# Supplementary material for: Physiological febrile heat stress increases cytoadhesion through increased protein trafficking of Plasmodium falciparum surface proteins into the red blood cell
Source: bioRxiv preprint, doi:10.1101/2025.05.14.653932, version 3 (2026-02-17)
Supplement: Supplementary Table 1 [file 653932_file03.xlsx]

## Sheet: README
Phosphoproteomes:
Column Name	Description
Leading proteins ID	Primary protein ID associated with the phosphopeptide source
Gene Name	Gene symbol corresponding to the protein
Product Description	Functional or annotated description of the protein product.
Log2FC [WT (Post Heat Stress) / WT (No Heat Stress)]	Log₂ fold change in phosphopeptide intensity between heat-stressed and control wild-type infected red blood cells (iRBCs), indicating differential phosphorylation.
Average WT (No Heat Stress)	Mean phosphopeptide intensity across biological replicates under baseline (non-heat stressed) wild-type iRBC conditions.
Average WT (Post Heat Stress)	Mean phosphopeptide intensity across replicates after exposure to heat stress in wild-type iRBCs.
WT iRBC Replicate 1 (No Heat Stress)	Raw or normalized intensity of the phosphopeptide in replicate 1 under control conditions.
WT iRBC Replicate 2 (No Heat Stress)	Same as above for replicate 2.
WT iRBC Replicate 1 (Post Heat Stress)	Intensity of the phosphopeptide in replicate 1 under heat stress conditions.
WT iRBC Replicate 2 (Post Heat Stress)	Same as above for replicate 2.
Possible Protein ID Matches	All protein IDs to which the phosphopeptide could be mapped (e.g., from homology or shared peptide sequences), separated by semicolons.
Positions within protein	Position(s) of the phosphorylated residue(s) within the full-length protein sequence.
Amino acid	The phosphorylated residue(s): S (Serine), T (Threonine), or Y (Tyrosine).
Multiplicity	Number of phosphorylation sites detected on the peptide.
Phospho (STY) Probabilities	Site localization probabilities indicating confidence in phosphorylation site assignment for each serine, threonine, or tyrosine.
Position in peptide	Position of the phosphorylated residue within the peptide sequence.
Sequence window	Amino acid sequence context surrounding the phosphorylation site
Predicted Host Exported? (Yes/No)	Indicates 'Yes' for P. falciparum proteins predicted to be exported beyond the parasite's plasma membrane.
Leading Protein Previous IDs	Lists identifiers that were previously used for this gene (P. falciparum genes only)
Proteomes:
Column Name	Description
Leading proteins ID	Primary identifier of the protein group
Gene Name	Gene symbol corresponding to the protein
Product Description	Functional or annotated description of the protein product.
Log2FC [WT iRBC (Post Heat Stress)/WT iRBC (No Heat Stress)]	Fold change in WT iRBCs following heat stress.
Log2FC [uRBC (Post Heat Stress)/uRBC (No Heat Stress)]	Log₂ fold change in protein abundance in uninfected red blood cells (uRBCs) following heat stress.
Average WT (No Heat Stress)	Mean protein intensity across WT iRBC replicates under non-stress conditions.
Average WT (Post Heat Stress)	Mean protein intensity across WT iRBC replicates following heat stress.
WT iRBC Replicate 1 (No Heat Stress)	Raw or normalized intensity for replicate 1, WT iRBC under control conditions.
WT iRBC Replicate 2 (No Heat Stress)	Same as above for replicate 2.
WT iRBC Replicate 1 (Post Heat Stress)	Intensity in replicate 1, WT iRBC following heat stress.
WT iRBC Replicate 2 (Post Heat Stress)	Same as above for replicate 2.
uRBC (No Heat Stress)	Protein intensity in uninfected RBCs under control conditions.
uRBC (Post Heat Stress)	Protein intensity in uninfected RBCs following heat stress.
Possible Protein ID Matches	All protein IDs to which the peptides could be mapped, separated by semicolons.
Intensity Proteome	Total measured protein abundance value, the sum of peptide intensities mapped to the protein group.
Razor + unique peptides Proteome	Number of razor peptides and unique peptides used for quantification.
Sequence coverage Proteome [%]	Percentage of the protein sequence covered by identified peptides.
Mol. weight [kDa]	Predicted molecular weight of the full-length protein in kilodaltons.
Predicted Host Exported? (Yes/No)	Indicates 'Yes' for P. falciparum proteins predicted to be exported beyond the parasite's plasma membrane.
Leading Protein Previous IDs	Lists identifiers that were previously used for this gene (P. falciparum genes only)

## Sheet: 1 Pf Phosphoproteome
Leading Protein ID	Gene Name	Product Description	Predicted Host Exported? (Yes/No)	Log2FC [WT (Post Heat Stress) /WT (No Heat Stress)]	Average WT (No Heat Stress)	Average WT (Post Heat Stress)	WT iRBC Replicate 1 (No Heat Stress)	WT iRBC Replicate 2 (No Heat Stress)	WT iRBC Replicate 1 (Post Heat Stress)	WT iRBC Replicate 2 (Post Heat Stress)	Possible Protein ID Matches	Positions within protein	Amino acid	Multiplicity	Phospho (STY) Probabilities	Position in peptide	Sequence window	Leading Protein Previous IDs
PF3D7_0402000		Plasmodium exported protein (PHISTa), unknown function	Yes	3.40641	0.535242	3.94165	0.44442	0.626064	3.74323	4.14007	PF3D7_0402000	224	S	___1	FGS(1)YEQVLISQPHEFNER	3	QKYGRCYEERPNRFGSYEQVLISQPHEFNER	MAL4P1.18;PFD0090c
PF3D7_0424700	FIKK4.2	serine/threonine protein kinase, FIKK family	Yes	2.61403	0.818248	3.43227	0.93367	0.702826	3.14098	3.72357	PF3D7_0424700	250	S	___1	VYS(1)WELGKEALTK	3	CKVENVENINYERVYSWELGKEALTKLLGCS	MAL4P1.230;PFD1175w
PF3D7_0702500		Plasmodium exported protein, unknown function	Yes	2.37659	-2.70628	-0.32969	-2.50655	-2.90602	-0.403839	-0.255541	PF3D7_0702500	206	S	___3	NY(0.004)S(0.996)LGNLS(0.007)T(0.006)GT(0.005)T(0.004)S(0.014)QGS(0.492)T(0.492)S(0.52)S(0.459)R	18	SLGNLSTGTTSQGSTSSRHYSLGGQPSSSGR	PF07_0008
PF3D7_0731100	PTP2	EMP1-trafficking protein	Yes	2.1387	-0.500012	1.63869	-0.561769	-0.438255	1.48379	1.79358	PF3D7_0731100	159	S	___1	APS(0.999)GS(0.001)LFNSPENFQGGYK	3	NKQDSFENEGYYRAPSGSLFNSPENFQGGYK	MAL7P1.172
PF3D7_0731100	PTP2	EMP1-trafficking protein	Yes	2.08597	-1.96981	0.116165	-1.95018	-1.98944	-0.16375	0.39608	PF3D7_0731100	165	S	___1	APSGS(0.001)LFNS(0.999)PENFQGGYK	9	ENEGYYRAPSGSLFNSPENFQGGYKNEENPR	MAL7P1.172
PF3D7_0731100	PTP2	EMP1-trafficking protein	Yes	2.08478	3.44183	5.52661	3.50299	3.38067	5.38701	5.66621	PF3D7_0731100	231	S	___1	IS(0.054)S(0.943)GS(0.003)FISRPENIQGIAK	3	NIQGAGKIEEGSRISSGSFISRPENIQGIAK	MAL7P1.172
PF3D7_0731100	PTP2	EMP1-trafficking protein	Yes	2.05589	-1.48323	0.57266	-1.28658	-1.67987	0.38245	0.762871	PF3D7_0731100	281	T	___1	MPS(0.039)GT(0.961)FFDGIENLQR	5	QGTLKNEENPRMPSGTFFDGIENLQRVHKTE	MAL7P1.172
PF3D7_1039000	FIKK10.2	serine/threonine protein kinase, FIKK family	Yes	2.04133	-2.19088	-0.149545	-2.24249	-2.13927	-0.44713	0.148041	PF3D7_1039000	249	Y	___1	DKGIY(0.918)Y(0.082)K	5	EKIELVNGNSKDKGIYYKNNLGNEKKNDYRT	PF10_0380
PF3D7_0935900	REX1	ring-exported protein 1	Yes	1.99844	-2.01027	-0.0118341	-1.856	-2.16455	-0.213209	0.189541	PF3D7_0935900	594	T	___1	GS(0.03)S(0.127)T(0.617)S(0.141)DKNT(0.042)T(0.042)ENQLNAEAQS(0.001)EVKPQWQK	4	DALAKKESEAPKGSSTSDKNTTENQLNAEAQ	PFI1735c
PF3D7_1149000	Pf332	antigen 332, DBL-like protein	Yes	1.97862	1.26048	3.23911	1.20839	1.31257	3.25828	3.21993	PF3D7_1149000	79	S	___1	S(1)LADYKDIFQGK	1	KHDESCDEFCDAWNRSLADYKDIFQGKDMWN	PF11_0506;PF11_0507
PF3D7_1016700		Plasmodium exported protein (PHISTc), unknown function	Yes	1.95299	0.631873	2.58487	0.654531	0.609215	2.44439	2.72534	PF3D7_1016700	321	S	___1	NT(0.002)S(0.998)QGNFQR	3	YDLNGYNHKMDGRNTSQGNFQRDLYVEENSR	PF10_0162
PF3D7_0702500		Plasmodium exported protein, unknown function	Yes	1.93557	2.63029	4.56586	2.62407	2.63651	4.1996	4.93211	PF3D7_0702500	217	S	___2	HYSLGGQPS(0.95)S(0.049)S(0.001)GR	9	QGSTSSRHYSLGGQPSSSGRSFSGSKYNTSN	PF07_0008
PF3D7_0702500		Plasmodium exported protein, unknown function	Yes	1.85082	4.99415	6.84497	5.00313	4.98516	6.74128	6.94865	PF3D7_0702500	180	S	___1	KEHS(0.992)T(0.008)HDLPAGR	4	VGSHSVSSQEHKKEHSTHDLPAGRNYSLGNL	PF07_0008
PF3D7_0702500		Plasmodium exported protein, unknown function	Yes	1.84647	2.78495	4.63142	2.79304	2.77687	4.27447	4.98837	PF3D7_0702500	211	S	___2	HYS(1)LGGQPSSSGR	3	STGTTSQGSTSSRHYSLGGQPSSSGRSFSGS	PF07_0008
PF3D7_0702500		Plasmodium exported protein, unknown function	Yes	1.8135	3.22302	5.03652	3.23388	3.21217	4.90929	5.16376	PF3D7_0702500	181	T	___1	KEHS(0.114)T(0.886)HDLPAGR	5	GSHSVSSQEHKKEHSTHDLPAGRNYSLGNLS	PF07_0008
PF3D7_0702400	SEMP1	small exported membrane protein 1	Yes	1.79687	6.41585	8.21272	6.4895	6.3422	7.99106	8.43437	PF3D7_0702400	31	S	___1	KFNPTRNPS(1)QSGPYR	9	AANTQEKKFNPTRNPSQSGPYRHHGPQGRTP	PF07_0007
PF3D7_0731100	PTP2	EMP1-trafficking protein	Yes	1.71212	-0.103951	1.60817	-0.145409	-0.0624943	1.50455	1.71178	PF3D7_0731100	719	T	___1	YNT(1)QQNSK	3	EKFNKTRDHSNNRYNTQQNSKGSNISEVRKK	MAL7P1.172
PF3D7_0801000		Plasmodium exported protein (PHISTc), unknown function	Yes	1.68887	2.34711	4.03597	2.43043	2.26378	3.85088	4.22107	PF3D7_0801000	501	S	___1	LQS(1)VEGK	3	PSKFNKKNLFEQRLQSVEGKNFFEGRSQNLE	PF08_0137
PF3D7_0731100	PTP2	EMP1-trafficking protein	Yes	1.64314	0.316194	1.95933	0.284801	0.347586	1.77092	2.14774	PF3D7_0731100	279	S	___1	MPS(1)GTFFDGIENLQR	3	NFQGTLKNEENPRMPSGTFFDGIENLQRVHK	MAL7P1.172
PF3D7_1325400		conserved Plasmodium protein, unknown function	No	1.64018	-5.12065	-3.48047	-4.71819	-5.5231	-3.72805	-3.23289	PF3D7_1325400	791	S	___2	RY(0.998)Y(0.447)S(0.555)INHK	4	VKEFDKVVNNMKRYYSINHKTNKKWNLSEYC	MAL13P1.137;PF13_0145
PF3D7_1325400		conserved Plasmodium protein, unknown function	No	1.64018	-5.12065	-3.48047	-4.71819	-5.5231	-3.72805	-3.23289	PF3D7_1325400	789	Y	___2	RY(0.998)Y(0.447)S(0.555)INHK	2	EGVKEFDKVVNNMKRYYSINHKTNKKWNLSE	MAL13P1.137;PF13_0145
PF3D7_0702500		Plasmodium exported protein, unknown function	Yes	1.62673	2.79725	4.42397	2.77923	2.81527	4.29187	4.55608	PF3D7_0702500	191	S	___2	NYS(1)LGNLSTGTTSQGSTSSR	3	KKEHSTHDLPAGRNYSLGNLSTGTTSQGSTS	PF07_0008
PF3D7_0731100	PTP2	EMP1-trafficking protein	Yes	1.62169	-1.20136	0.420335	-1.05938	-1.34333	0.25993	0.58074	PF3D7_0731100	448	S	___1	YT(0.11)S(0.89)GSFYNGNSNYQTSYK	3	NFSGSKITEENNRYTSGSFYNGNSNYQTSYK	MAL7P1.172
PF3D7_0702500		Plasmodium exported protein, unknown function	Yes	1.61665	-3.59889	-1.98224	-3.57377	-3.62401	-2.14958	-1.8149	PF3D7_0702500	200	T	___3	NYS(0.031)LGNLS(0.395)T(0.452)GT(0.534)T(0.537)S(0.065)QGS(0.826)T(0.146)S(0.01)S(0.003)R	12	PAGRNYSLGNLSTGTTSQGSTSSRHYSLGGQ	PF07_0008
PF3D7_0402000		Plasmodium exported protein (PHISTa), unknown function	Yes	1.58114	-0.248443	1.3327	-0.15917	-0.337715	1.08766	1.57773	PF3D7_0402000	151	S	___1	KLS(1)QDYNDVNKK	3	RGTQNTETKKSNKKLSQDYNDVNKKFTKEQM	MAL4P1.18;PFD0090c
PF3D7_1039000	FIKK10.2	serine/threonine protein kinase, FIKK family	Yes	1.54253	-1.10058	0.441951	-1.05168	-1.14948	0.248041	0.63586	PF3D7_1039000	509	T	___1	IPT(1)LGFCK	3	VNNIKYSEWNLERIPTLGFCKEDDRVQEMFK	PF10_0380
PF3D7_1353100		Plasmodium exported protein, unknown function	Yes	1.54226	-1.38318	0.159075	-1.47367	-1.2927	-0.0117397	0.329889	PF3D7_1353100	107	T	___2	AHHT(0.977)GERT(0.529)S(0.467)Y(0.024)T(0.003)EVK	4	DHHEETEDVNHKAHHTGERTSYTEVKHRRSS	PF13_0275
PF3D7_0922500	PGK	phosphoglycerate kinase	No	1.52828	0.943703	2.47198	0.68936	1.19805	2.28871	2.65526	PF3D7_0922500	7	S	___1	LS(1)ISDLK	2	_________MLGNKLSISDLKDIKNKKVLVR	PFI1105w
PF3D7_1353100		Plasmodium exported protein, unknown function	Yes	1.52235	-1.72106	-0.198714	-1.86919	-1.57294	-0.370539	-0.0268898	PF3D7_1353100	111	T	___2	T(0.991)S(0.009)YTEVK	1	ETEDVNHKAHHTGERTSYTEVKHRRSSSNSH	PF13_0275
PF3D7_0501200	PIESP2	parasite-infected erythrocyte surface protein	Yes	1.50865	-0.441037	1.06761	-0.311649	-0.570425	0.947561	1.18766	PF3D7_0501200	177	T	___1	GYYNVFFENYANDT(0.5)ES(0.5)NVHNKPEEVHK	14	LKGYYNVFFENYANDTESNVHNKPEEVHKHE	MAL5P1.13;PFE0060w
PF3D7_0113200		Plasmodium exported protein, unknown function	Yes	1.48808	0.230477	1.71856	0.33659	0.124365	1.6785	1.75862	PF3D7_0113200	396	S	___1	HES(1)LHS(0.998)Y(0.001)NIKET(0.001)PK	6	NDKIRKSNNRHESLHSYNIKETPKKNKKKSQ	MAL1P3.08;PFA0630c
PF3D7_0212800	MATE	multidrug efflux pump, putative	No	1.47442	-3.77335	-2.29892	-3.84431	-3.70238	-2.31267	-2.28518	PF3D7_0212800	177	T	___1	NFYS(0.092)NPT(0.773)EVNY(0.112)NS(0.022)LLS(0.001)NNLK	7	IHYHTKKNKNFYSNPTEVNYNSLLSNNLKHN	PF02_0120;PFB0580w
PF3D7_0922500	PGK	phosphoglycerate kinase	No	1.46232	-1.77026	-0.30794	-1.76074	-1.77979	-0.516579	-0.0993004	PF3D7_0922500	114	S	___1	ENS(1)VILLENLR	3	VGKEVEDKINAAKENSVILLENLRFHIEEEG	PFI1105w
PF3D7_0702500		Plasmodium exported protein, unknown function	Yes	1.45869	3.63216	5.09085	3.81613	3.44818	5.00067	5.18103	PF3D7_0702500	237	S	___1	YNTSNLASS(0.006)S(0.991)T(0.002)TESSVSGLNTNEAHV	10	SFSGSKYNTSNLASSSTTESSVSGLNTNEAH	PF07_0008
PF3D7_1106800	pTKL	protein kinase, putative	Yes	1.45414	0.375853	1.82999	0.36994	0.381765	1.91803	1.74195	PF3D7_1106800	508	S	___1	S(0.662)LQNS(0.338)NGEYYLINHLSK	1	EKKKKNIIKFIKNNKSLQNSNGEYYLINHLS	PF11_0079
PF3D7_0702500		Plasmodium exported protein, unknown function	Yes	1.4508	2.27902	3.72982	2.26311	2.29494	3.62241	3.83723	PF3D7_0702500	204	S	___2	NYS(0.977)LGNLS(0.023)TGTTS(0.002)QGS(0.987)T(0.01)SSR	16	NYSLGNLSTGTTSQGSTSSRHYSLGGQPSSS	PF07_0008
PF3D7_0702500		Plasmodium exported protein, unknown function	Yes	1.43675	0.610798	2.04755	0.61907	0.602526	1.94168	2.15342	PF3D7_0702500	161	S	___3	NS(0.153)S(0.825)QHS(0.968)VGS(0.107)HS(0.918)VS(0.026)S(0.004)QEHK	3	TENHLSGSNSDGRNSSQHSVGSHSVSSQEHK	PF07_0008
PF3D7_0702500		Plasmodium exported protein, unknown function	Yes	1.42652	1.00606	2.43258	1.046	0.966125	2.31204	2.55313	PF3D7_0702500	196	S	___2	NYS(0.001)LGNLS(0.958)T(0.03)GT(0.011)T(0.001)S(0.009)QGS(0.839)T(0.126)S(0.02)S(0.006)R	8	THDLPAGRNYSLGNLSTGTTSQGSTSSRHYS	PF07_0008
PF3D7_1039000	FIKK10.2	serine/threonine protein kinase, FIKK family	Yes	1.4265	-3.15322	-1.72671	-3.11235	-3.19409	-1.98083	-1.4726	PF3D7_1039000	303	Y	___1	IRENIY(1)HGLEK	6	EENIDYNKERIRENIYHGLEKIEEEIKERME	PF10_0380
PF3D7_0702500		Plasmodium exported protein, unknown function	Yes	1.4145	0.780363	2.19487	0.78087	0.779856	2.10006	2.28967	PF3D7_0702500	169	S	___3	NSSQHSVGS(0.008)HS(0.992)VSSQEHK	11	NSDGRNSSQHSVGSHSVSSQEHKKEHSTHDL	PF07_0008
PF3D7_0807200		conserved Plasmodium membrane protein, unknown function	No	1.41112	1.46087	2.87199	1.34362	1.57812	2.89717	2.84681	PF3D7_0807200	17	S	___1	LS(0.004)S(0.995)LITQNIK	3	KTMSMIHEVGLNKLSSLITQNIKQKIIKRKD	MAL8P1.130
PF3D7_0702400	SEMP1	small exported membrane protein 1	Yes	1.403	-2.05186	-0.648854	-2.13143	-1.97228	-0.80691	-0.490799	PF3D7_0702400	47	Y	___1	T(0.009)PY(0.991)MQLHK	3	QSGPYRHHGPQGRTPYMQLHKNQNNNMVNKI	PF07_0007
PF3D7_0932200	PFN	profilin	No	1.40213	-6.87337	-5.47124	-6.5221	-7.22464	-5.70008	-5.24241	PF3D7_0932200	5	Y	___1	AEEY(0.536)S(0.45)WDS(0.013)Y(0.002)LNDR	4	___________MAEEYSWDSYLNDRLLATNQ	PFI1565w
PF3D7_0702500		Plasmodium exported protein, unknown function	Yes	1.39239	0.203287	1.59568	0.19076	0.215815	1.46709	1.72427	PF3D7_0702500	167	S	___2	NS(0.534)S(0.491)QHS(0.957)VGS(0.854)HS(0.145)VS(0.016)S(0.004)QEHK	9	GSNSDGRNSSQHSVGSHSVSSQEHKKEHSTH	PF07_0008
PF3D7_0922500	PGK	phosphoglycerate kinase	No	1.38046	-1.67747	-0.297009	-1.78726	-1.56768	-0.42272	-0.171299	PF3D7_0922500	377	S	___1	KGAITIVGGGDT(0.021)AS(0.979)LVEQQNK	14	TKKGAITIVGGGDTASLVEQQNKKNEISHVS	PFI1105w
PF3D7_0500800	MESA	mature parasite-infected erythrocyte surface antigen	Yes	1.37235	2.53942	3.91177	2.61144	2.4674	3.84119	3.98234	PF3D7_0500800	547	S	___2	VIGS(1)EKT(1)QKEIK	4	DVKEKNDGKKDKVIGSEKTQKEIKEKVEKRV	MAL5P1.9;PFE0040c
PF3D7_0500800	MESA	mature parasite-infected erythrocyte surface antigen	Yes	1.37235	2.53942	3.91177	2.61144	2.4674	3.84119	3.98234	PF3D7_0500800	550	T	___2	VIGS(1)EKT(1)QKEIK	7	EKNDGKKDKVIGSEKTQKEIKEKVEKRVKKK	MAL5P1.9;PFE0040c
PF3D7_1149000	Pf332	antigen 332, DBL-like protein	Yes	1.37014	1.99111	3.36125	2.21081	1.77142	3.33722	3.38528	PF3D7_1149000	4498	S	___1	QVS(1)VTEDIVEK	3	LEEETATEEIVEKQVSVTEDIVEKEGSVNEE	PF11_0506;PF11_0507
PF3D7_1149000	Pf332	antigen 332, DBL-like protein	Yes	1.36647	2.07788	3.44436	2.2935	1.86226	3.46365	3.42506	PF3D7_1149000	4500	T	___1	QVS(0.277)VT(0.723)EDIVEK	5	EETATEEIVEKQVSVTEDIVEKEGSVNEEII	PF11_0506;PF11_0507
PF3D7_0702500		Plasmodium exported protein, unknown function	Yes	1.35437	0.989263	2.34364	0.96084	1.01768	2.22453	2.46274	PF3D7_0702500	169	S	___2	NSSQHSVGS(0.008)HS(0.992)VSSQEHK	11	NSDGRNSSQHSVGSHSVSSQEHKKEHSTHDL	PF07_0008
PF3D7_0424600		Plasmodium exported protein (PHISTb), unknown function	Yes	1.34326	0.697483	2.04074	0.538841	0.856125	1.94947	2.13201	PF3D7_0424600	157	S	___1	Y(0.002)NS(0.004)NY(0.011)S(0.982)PIPY(0.001)PEQYNPVDYNK	6	KLIDDINKFRYNSNYSPIPYPEQYNPVDYNK	MAL4P1.229;PFD1170c
PF3D7_1201000		Plasmodium exported protein (PHISTb), unknown function	Yes	1.34232	0.678178	2.0205	0.82773	0.528625	1.9375	2.1035	PF3D7_1201000	403	S	___1	AVPQNS(0.971)GS(0.029)NFDEFLDVK	6	KVSNIKNNLRAVPQNSGSNFDEFLDVKEANE	2277.t00010;MAL12P1.10;PFL0050c
PF3D7_1358700	YOP1L	YOP1-like protein, putative	No	1.33932	2.50058	3.8399	2.50941	2.49174	4.02449	3.6553	PF3D7_1358700	148	S	___1	SIVS(1)KKDLY	4	EKSNKKIHNKIKSIVSKKDLY__________	MAL13P1.288
PF3D7_1478600	PTP3	EMP1-trafficking protein	Yes	1.33362	-0.140132	1.19349	-0.139189	-0.141075	0.924141	1.46283	PF3D7_1478600;PF3D7_1477000	1162;913	S	___1	VKDIVS(1)K	6	GTKTKDGLNKVKDIVSKKCGIDVESDIDIET	PF14_0758
PF3D7_0922500	PGK	phosphoglycerate kinase	No	1.3296	-0.481028	0.84857	-0.65798	-0.304075	0.470221	1.22692	PF3D7_0922500	9	S	___1	LS(0.334)IS(0.666)DLK	4	_______MLGNKLSISDLKDIKNKKVLVRVD	PFI1105w
PF3D7_0731100	PTP2	EMP1-trafficking protein	Yes	1.32817	0.442122	1.7703	0.41272	0.471525	1.68112	1.85947	PF3D7_0731100	255	S	___1	NEES(0.001)S(0.001)RIPS(0.836)GS(0.162)FFNSPQNFQGTLK	9	NIQGIAKNEESSRIPSGSFFNSPQNFQGTLK	MAL7P1.172
PF3D7_0401800	PfD80	Plasmodium exported protein (PHISTb), unknown function	Yes	1.32618	1.85099	3.17718	1.93266	1.76933	3.05123	3.30312	PF3D7_0401800	282	S	___2	LPSTGS(0.979)T(0.021)IR	6	TGSTSGSTTRLPSTGSTIRFPSTGSSRLEDY	MAL4P1.16;PFD0080c
PF3D7_0501200	PIESP2	parasite-infected erythrocyte surface protein	Yes	1.32345	2.35573	3.67918	2.27312	2.43834	3.48186	3.8765	PF3D7_0501200	179	S	___1	GYYNVFFENYANDT(0.001)ES(0.999)NVHNKPEEVHK	16	GYYNVFFENYANDTESNVHNKPEEVHKHEEI	MAL5P1.13;PFE0060w
PF3D7_0702500		Plasmodium exported protein, unknown function	Yes	1.31897	1.08517	2.40414	1.0712	1.09914	2.30914	2.49914	PF3D7_0702500	164	S	___3	NS(0.458)S(0.542)QHS(1)VGSHSVSSQEHKK	6	HLSGSNSDGRNSSQHSVGSHSVSSQEHKKEH	PF07_0008
PF3D7_0402400	GEXP18	Plasmodium exported protein, unknown function	Yes	1.31265	0.0488033	1.36145	0.0742111	0.0233955	1.19706	1.52585	PF3D7_0402400	117	S	___1	DHIS(1)ENVK	4	EKYVDNYEYNVRDHISENVKLGNDSIGDNIS	MAL4P1.23;PFD0115c
PF3D7_0702500		Plasmodium exported protein, unknown function	Yes	1.30487	-2.21018	-0.90531	-2.14535	-2.27501	-1.06889	-0.74173	PF3D7_0702500	199	T	___3	NYS(0.002)LGNLS(0.523)T(0.57)GT(0.68)T(0.302)S(0.218)QGS(0.607)T(0.078)S(0.017)S(0.004)R	11	LPAGRNYSLGNLSTGTTSQGSTSSRHYSLGG	PF07_0008
PF3D7_0501000		Plasmodium exported protein, unknown function	Yes	1.2938	0.496713	1.79051	0.695921	0.297504	1.83	1.75103	PF3D7_0501000	136	S	___1	NPCAIPQDDLS(1)NEGIEIIDYVDKKEEEK	11	HNPEKNPCAIPQDDLSNEGIEIIDYVDKKEE	MAL5P1.11;PFE0050w
PF3D7_0401800	PfD80	Plasmodium exported protein (PHISTb), unknown function	Yes	1.27812	2.89663	4.17475	2.82411	2.96915	4.12654	4.22296	PF3D7_0401800	139	T	___1	S(0.002)AS(0.016)AAS(0.975)T(0.961)T(0.952)RS(0.092)AS(0.046)AAS(0.836)T(0.106)T(0.015)R	7	TASAASTTRSASAASTTRSASAASTTRSASA	MAL4P1.16;PFD0080c
PF3D7_0113200		Plasmodium exported protein, unknown function	Yes	1.27401	-0.190227	1.08378	-0.130339	-0.250114	1.14119	1.02637	PF3D7_0113200	188	S	___2	NQS(1)IS(0.531)S(0.469)NNNNNNNKEEEEECTK	3	KKDKRNISISNKRNQSISSNNNNNNNKEEEE	MAL1P3.08;PFA0630c
PF3D7_0113200		Plasmodium exported protein, unknown function	Yes	1.27309	0.119534	1.39262	0.188292	0.0507755	1.42688	1.35836	PF3D7_0113200	190	S	___2	NQS(0.002)IS(0.977)S(0.021)NNNNNNNKEEEEECTK	5	DKRNISISNKRNQSISSNNNNNNNKEEEEEC	MAL1P3.08;PFA0630c
PF3D7_1353100		Plasmodium exported protein, unknown function	Yes	1.27096	1.68545	2.9564	1.76669	1.6042	2.86532	3.04749	PF3D7_1353100	112	S	___1	T(0.025)S(0.975)YTEVK	2	TEDVNHKAHHTGERTSYTEVKHRRSSSNSHV	PF13_0275
PF3D7_0113200		Plasmodium exported protein, unknown function	Yes	1.26574	-2.25268	-0.98694	-2.14695	-2.3584	-1.04986	-0.924021	PF3D7_0113200	191	S	___2	NQS(0.083)IS(0.937)S(0.98)NNNNNNNKEEEEECTK	6	KRNISISNKRNQSISSNNNNNNNKEEEEECT	MAL1P3.08;PFA0630c
PF3D7_0220300		Plasmodium exported protein, unknown function	Yes	1.26253	0.750738	2.01327	0.991461	0.510015	1.92838	2.09815	PF3D7_0220300	76	S	___1	MLDISFDSSKAS(0.973)T(0.023)T(0.004)K	12	ATVKMLDISFDSSKASTTKTRRFIHDRYSTA	PF02_0190;PFB0923c
PF3D7_0708400	HSP90	heat shock protein 90	No	1.26228	1.8762	3.13848	1.83653	1.91587	2.97384	3.30312	PF3D7_0708400	489	S	___1	S(1)GDEMIGLK	1	NRTKITELLRFQTSKSGDEMIGLKEYVDRMK	PF07_0029
PF3D7_0702500		Plasmodium exported protein, unknown function	Yes	1.25864	2.83142	4.09006	2.86213	2.8007	3.98645	4.19366	PF3D7_0702500	164	S	___2	NS(0.458)S(0.542)QHS(1)VGSHSVSSQEHKK	6	HLSGSNSDGRNSSQHSVGSHSVSSQEHKKEH	PF07_0008
PF3D7_1201000		Plasmodium exported protein (PHISTb), unknown function	Yes	1.25672	-1.15476	0.101966	-1.12721	-1.1823	0.0905914	0.11334	PF3D7_1201000	405	S	___1	AVPQNS(0.436)GS(0.564)NFDEFLDVK	8	SNIKNNLRAVPQNSGSNFDEFLDVKEANEIV	2277.t00010;MAL12P1.10;PFL0050c
PF3D7_1353100		Plasmodium exported protein, unknown function	Yes	1.25093	-2.69536	-1.44443	-2.73937	-2.65135	-1.70085	-1.18801	PF3D7_1353100	121	S	___2	S(0.872)S(0.458)S(0.394)NS(0.276)HVESNTFQNK	1	HTGERTSYTEVKHRRSSSNSHVESNTFQNKE	PF13_0275
PF3D7_0524000	KASbeta	karyopherin beta	No	1.2456	-0.355337	0.89026	-0.254829	-0.455845	0.82243	0.95809	PF3D7_0524000	360	S	___1	EGKDDS(1)QELYDIGEESLDR	6	CFNEWMNSIKEGKDDSQELYDIGEESLDRVG	MAL5P1.239;PFE1195w
PF3D7_0401800	PfD80	Plasmodium exported protein (PHISTb), unknown function	Yes	1.24191	-1.79905	-0.557139	-1.72343	-1.87466	-0.637749	-0.47653	PF3D7_0401800	280	T	___2	LPS(0.164)T(0.815)GS(0.021)TIRFPSTGSSR	4	PSTGSTSGSTTRLPSTGSTIRFPSTGSSRLE	MAL4P1.16;PFD0080c
PF3D7_0702500		Plasmodium exported protein, unknown function	Yes	1.24164	0.294463	1.53611	0.29565	0.293276	1.46084	1.61137	PF3D7_0702500	160	S	___2	NS(0.683)S(0.611)QHS(0.611)VGS(0.083)HS(0.011)VSSQEHKK	2	STENHLSGSNSDGRNSSQHSVGSHSVSSQEH	PF07_0008
PF3D7_1002100	PTP5	EMP1-trafficking protein	Yes	1.23973	-1.49757	-0.257844	-1.46129	-1.53386	-0.378899	-0.136789	PF3D7_1002100	215	S	___1	SKPSQLDGNNHSET(0.001)S(0.214)S(0.785)HQGEKNNENETEK	16	SKPSQLDGNNHSETSSHQGEKNNENETEKKT	PF10_0025
PF3D7_1002100	PTP5	EMP1-trafficking protein	Yes	1.23839	-2.64662	-1.40823	-2.55694	-2.73631	-1.26616	-1.55031	PF3D7_1002100	400	S	___1	GS(0.134)S(0.775)EGET(0.03)S(0.03)S(0.03)NKES(0.001)NESNEPTK	3	SKYTMNLDSPLLKGSSEGETSSNKESNESNE	PF10_0025
PF3D7_1138500	PPM2	protein phosphatase PPM2	No	1.22516	-1.86197	-0.63681	-1.86286	-1.86107	-0.77223	-0.50139	PF3D7_1138500	10	T	___1	T(0.608)NKES(0.392)LDGGNLELDPSR	1	______MGAYLSSPKTNKESLDGGNLELDPS	PF11_0396
PF3D7_0532400	LyMP	lysine-rich membrane-associated PHISTb protein	Yes	1.21287	5.70682	6.91969	5.76014	5.6535	6.78594	7.05344	PF3D7_0532400	310	S	___1	RKS(1)NPNNEISLR	3	VSKLPKKKKLRNRRKSNPNNEISLRTYGQST	MAL5P1.315;PFE1605w
PF3D7_0905400	RhopH3	high molecular weight rhoptry protein 3	Yes	1.20691	-0.110632	1.09628	-0.0640087	-0.157255	0.991491	1.20106	PF3D7_0905400	854	S	___1	S(0.081)S(0.919)LKLDQLDK	2	EGTSNLKKGLEFYKSSLKLDQLDKEKPKKKK	PFI0265c
PF3D7_0702500		Plasmodium exported protein, unknown function	Yes	1.20643	-0.824812	0.381616	-0.822109	-0.827515	0.265631	0.497601	PF3D7_0702500	190	Y	___2	NY(0.731)S(0.219)LGNLS(0.05)T(0.001)GT(0.004)T(0.087)S(0.016)QGS(0.733)T(0.148)S(0.005)S(0.005)R	2	HKKEHSTHDLPAGRNYSLGNLSTGTTSQGST	PF07_0008
PF3D7_0702500		Plasmodium exported protein, unknown function	Yes	1.20585	-1.53485	-0.328995	-1.52227	-1.54742	-0.500849	-0.157141	PF3D7_0702500	197	T	___2	NYSLGNLS(0.941)T(0.941)GT(0.083)T(0.027)S(0.008)QGSTSSR	9	HDLPAGRNYSLGNLSTGTTSQGSTSSRHYSL	PF07_0008
PF3D7_0702500		Plasmodium exported protein, unknown function	Yes	1.19132	1.78881	2.98013	1.86764	1.70997	2.87981	3.08045	PF3D7_0702500	161	S	___2	NS(0.153)S(0.825)QHS(0.968)VGS(0.107)HS(0.918)VS(0.026)S(0.004)QEHK	3	TENHLSGSNSDGRNSSQHSVGSHSVSSQEHK	PF07_0008
PF3D7_0702500		Plasmodium exported protein, unknown function	Yes	1.1822	3.71348	4.89569	3.69438	3.73258	4.81685	4.97452	PF3D7_0702500	222	S	___1	S(0.764)FS(0.161)GS(0.076)K	1	SRHYSLGGQPSSSGRSFSGSKYNTSNLASSS	PF07_0008
PF3D7_0730900	PTP4	EMP1-trafficking protein	Yes	1.17181	0.0808229	1.25264	0.166321	-0.00467491	1.15304	1.35223	PF3D7_0730900	676	S	___1	KEVS(1)VPR	4	SEFKNNFDGGINKEVSVPRLSVNEFENNDDV	MAL7P1.171
PF3D7_0702500		Plasmodium exported protein, unknown function	Yes	1.17083	-0.878778	0.292055	-0.973829	-0.783726	0.20801	0.376101	PF3D7_0702500	242	S	___1	YNTSNLASSSTTES(0.033)S(0.967)VSGLNTNEAHV	15	KYNTSNLASSSTTESSVSGLNTNEAHV____	PF07_0008
PF3D7_1120100	PGM1	phosphoglycerate mutase, putative	No	1.16993	-1.74534	-0.575404	-1.80077	-1.68991	-0.597389	-0.553419	PF3D7_1120100	26	T	___1	FT(0.414)GWT(0.577)DVPLS(0.009)EKGEEEAIAAGK	5	HGESTWNKENKFTGWTDVPLSEKGEEEAIAA	PF11_0208
PF3D7_0401800	PfD80	Plasmodium exported protein (PHISTb), unknown function	Yes	1.16821	1.99717	3.16538	1.97352	2.02081	3.13334	3.19742	PF3D7_0401800	138	S	___1	SAS(0.001)AAS(0.98)T(0.019)TR	6	STASAASTTRSASAASTTRSASAASTTRSAS	MAL4P1.16;PFD0080c
PF3D7_1001500	ETRAMP10	early transcribed membrane protein 10.1	Yes	1.1611	1.43277	2.59387	1.6896	1.17594	2.71072	2.47701	PF3D7_1001500	99	S	___2	SQEGS(0.985)T(0.015)PLLTAKA	5	DKKGSNDSKNKSQEGSTPLLTAKA_______	PF10_0019
PF3D7_0424600		Plasmodium exported protein (PHISTb), unknown function	Yes	1.15616	2.15553	3.3117	2.23363	2.07743	3.22376	3.39963	PF3D7_0424600	124	T	___1	LNT(1)IGNLFEGEK	3	VIGSTFMLPNENRLNTIGNLFEGEKYNILED	MAL4P1.229;PFD1170c
PF3D7_0202000	KAHRP	knob-associated histidine-rich protein	Yes	1.15333	7.86153	9.01486	7.85863	7.86443	8.92377	9.10595	PF3D7_0202000	589	T	___1	EAS(0.002)T(0.995)T(0.003)EGATK	4	TKEASTSKGATKEASTTEGATKGASTTAGST	PF02_0020;PFB0100c
PF3D7_0113200		Plasmodium exported protein, unknown function	Yes	1.15315	1.82246	2.97561	1.89963	1.74529	3.01662	2.9346	PF3D7_0113200	342	S	___2	QDS(0.718)QT(0.369)S(0.908)Y(0.005)YGR	6	YTSRSNNPPRQDSQTSYYGRYTSRTNNQHRS	MAL1P3.08;PFA0630c
PF3D7_0702500		Plasmodium exported protein, unknown function	Yes	1.15241	-3.35875	-2.20634	-3.20269	-3.51482	-2.36079	-2.05189	PF3D7_0702500	236	S	___1	YNT(0.001)S(0.001)NLAS(0.004)S(0.57)S(0.363)T(0.024)T(0.037)ESSVSGLNTNEAHV	9	RSFSGSKYNTSNLASSSTTESSVSGLNTNEA	PF07_0008
PF3D7_0702500		Plasmodium exported protein, unknown function	Yes	1.15064	-1.45061	-0.299975	-1.40308	-1.49814	-0.43198	-0.167971	PF3D7_0702500	204	S	___3	NYS(0.977)LGNLS(0.023)TGTTS(0.002)QGS(0.987)T(0.01)SSR	16	NYSLGNLSTGTTSQGSTSSRHYSLGGQPSSS	PF07_0008
PF3D7_0702500		Plasmodium exported protein, unknown function	Yes	1.1435	-2.39623	-1.25272	-2.50263	-2.28983	-1.36038	-1.14507	PF3D7_0702500	169	S	___1	NSSQHSVGS(0.008)HS(0.992)VSSQEHK	11	NSDGRNSSQHSVGSHSVSSQEHKKEHSTHDL	PF07_0008
PF3D7_1149000	Pf332	antigen 332, DBL-like protein	Yes	1.14279	1.07663	2.21942	1.18292	0.970335	2.20461	2.23423	PF3D7_1149000	1379	S	___1	EGS(1)INEDIVK	3	EEEELVTEEVIEREGSINEDIVKEASITEEV	PF11_0506;PF11_0507
PF3D7_1478600	PTP3	EMP1-trafficking protein	Yes	1.14224	2.31101	3.45325	2.26022	2.3618	3.41312	3.49338	PF3D7_1478600;PF3D7_1477000	900;645	S	___1	SES(1)LKK	3	DMLNKNQKGKQLKSESLKKNELENKNTKNMD	PF14_0758
PF3D7_0113200		Plasmodium exported protein, unknown function	Yes	1.14049	1.54913	2.68963	1.72177	1.3765	2.7651	2.61415	PF3D7_0113200	415	T	___1	NNT(1)NNNKTDNYDFNK	3	KETPKKNKKKSQRNNTNNNKTDNYDFNKHTS	MAL1P3.08;PFA0630c
PF3D7_1004400		RNA-binding protein, putative	No	1.13876	2.79512	3.93388	3.35829	2.23195	4.27994	3.58782	PF3D7_1004400	5	S	___1	GKYS(0.999)VS(0.001)R	4	___________MGKYSVSRKGEYSAERRYHY	PF10_0047
PF3D7_0726100		Plasmodium exported protein, unknown function	Yes	1.13651	-0.159697	0.97681	-0.194899	-0.124495	0.955391	0.99823	PF3D7_0726100	487	S	___1	Y(0.002)S(0.99)NT(0.007)SSSIGSFSK	2	TYKHLLSNTKTRRKYSNTSSSIGSFSKSTTN	PF07_0107
PF3D7_0702500		Plasmodium exported protein, unknown function	Yes	1.13593	-0.325072	0.810855	-0.288319	-0.361826	0.711081	0.910629	PF3D7_0702500	191	S	___3	NYS(1)LGNLSTGTTSQGSTSSR	3	KKEHSTHDLPAGRNYSLGNLSTGTTSQGSTS	PF07_0008
PF3D7_1417800	MCM2	DNA replication licensing factor MCM2	No	1.13469	-1.99229	-0.857605	-1.66121	-2.32338	-0.691509	-1.0237	PF3D7_1417800	43	S	___1	QAELEGES(1)LFEEDEGFIFGADDEKK	8	GRLNEEERQAELEGESLFEEDEGFIFGADDE	PF14_0177
PF3D7_1149000	Pf332	antigen 332, DBL-like protein	Yes	1.13368	-0.0584879	1.07519	-0.0597	-0.0572758	1.0462	1.10418	PF3D7_1149000	3087	S	___1	QGS(1)VIEEVVEEEISTTEEK	3	VQDGSGTNDFVGKQGSVIEEVVEEEISTTEE	PF11_0506;PF11_0507
PF3D7_0220100		DnaJ protein, putative	Yes	1.131	0.278382	1.40938	0.32856	0.228205	1.35097	1.46779	PF3D7_0220100	568	S	___1	YDS(0.234)S(0.766)DEPENSK	4	NNDVLEIMDIIRYDSSDEPENSKNIGKKKKK	PF02_0188;PFB0920w
PF3D7_1371800		Plasmodium exported protein, unknown function	No	1.128	-1.7832	-0.655205	-1.68496	-1.88144	-0.68454	-0.62587	PF3D7_1371800	38	S	___1	S(1)YVPISSTPIKPLPEYYTFEFIR	1	HHIPPSKYGHNKYSRSYVPISSTPIKPLPEY	MAL13P1.110
PF3D7_0831700	HSP70x	heat shock protein 70	Yes	1.11934	2.09254	3.21189	2.19926	1.98582	3.13903	3.28474	PF3D7_0831700	110	T	___1	KFS(0.043)ET(0.812)T(0.145)VQSDMK	5	TVFDAKRLIGRKFSETTVQSDMKHWPFTVKG	MAL7P1.228
PF3D7_0424500	FIKK4.1	serine/threonine protein kinase, FIKK family	Yes	1.11824	-0.141203	0.97704	-0.0137901	-0.268616	0.98991	0.96417	PF3D7_0424500	163	S	___2	S(1)LS(1)IREDCNNK	1	HKENDVSLKKDQCKKSLSIREDCNNKNSKSY	MAL4P1.228;PFD1165w
PF3D7_0424500	FIKK4.1	serine/threonine protein kinase, FIKK family	Yes	1.11824	-0.141203	0.97704	-0.0137901	-0.268616	0.98991	0.96417	PF3D7_0424500	165	S	___2	S(1)LS(1)IREDCNNK	3	ENDVSLKKDQCKKSLSIREDCNNKNSKSYNE	MAL4P1.228;PFD1165w
PF3D7_1149000	Pf332	antigen 332, DBL-like protein	Yes	1.11578	4.37629	5.49207	4.47633	4.27625	5.44964	5.53449	PF3D7_1149000	4691	S	___1	QGS(1)VTEEK	3	EVDKSVIEEAVEKQGSVTEEKVQEGVSAIEE	PF11_0506;PF11_0507
PF3D7_0702500		Plasmodium exported protein, unknown function	Yes	1.11173	-4.08806	-2.97633	-3.98907	-4.18705	-2.82499	-3.12767	PF3D7_0702500	180	S	___2	KEHS(0.992)T(0.008)HDLPAGR	4	VGSHSVSSQEHKKEHSTHDLPAGRNYSLGNL	PF07_0008
PF3D7_1460700	RPL27	60S ribosomal protein L27	No	1.10872	0.566669	1.67539	0.655071	0.478266	1.62744	1.72334	PF3D7_1460700	95	S	___2	YQVANDFDIKS(1)LAS(1)DDVLK	11	ILPTRYQVANDFDIKSLASDDVLKSKNKKKE	PF14_0579
PF3D7_1460700	RPL27	60S ribosomal protein L27	No	1.10872	0.566669	1.67539	0.655071	0.478266	1.62744	1.72334	PF3D7_1460700	98	S	___2	YQVANDFDIKS(1)LAS(1)DDVLK	14	TRYQVANDFDIKSLASDDVLKSKNKKKEVKK	PF14_0579
PF3D7_0702500		Plasmodium exported protein, unknown function	Yes	1.10741	-3.06899	-1.96158	-3.09198	-3.04601	-2.19308	-1.73009	PF3D7_0702500	172	S	___2	NS(0.023)S(0.02)QHS(0.954)VGS(0.002)HS(0.001)VS(0.118)S(0.881)QEHK	14	GRNSSQHSVGSHSVSSQEHKKEHSTHDLPAG	PF07_0008
PF3D7_0936800		Plasmodium exported protein (PHISTc), unknown function	Yes	1.10381	-1.60843	-0.504624	-1.51134	-1.70552	-0.67569	-0.333559	PF3D7_0936800	75	T	___1	S(0.078)HS(0.182)T(0.737)S(0.003)DPKKNEEK	4	AEASPEEHNNLRSHSTSDPKKNEEKSLSDEI	PFI1780w
PF3D7_1133700		FHA domain-containing protein, putative	No	1.10379	-0.064477	1.03932	0.16711	-0.296064	1.06301	1.01562	PF3D7_1133700	820	S	___1	S(0.009)ES(0.975)KY(0.015)GR	3	SDESRIEKRREHRSESKYGRRSIRKSERSSE	PF11_0347
PF3D7_1353100		Plasmodium exported protein, unknown function	Yes	1.1018	0.483678	1.58548	0.535681	0.431675	1.49108	1.67987	PF3D7_1353100	111	T	___1	T(0.991)S(0.009)YTEVK	1	ETEDVNHKAHHTGERTSYTEVKHRRSSSNSH	PF13_0275
PF3D7_1106800	pTKL	protein kinase, putative	Yes	1.09721	-0.420967	0.676245	-0.461079	-0.380856	0.57774	0.77475	PF3D7_1106800	512	S	___1	S(0.146)LQNS(0.599)NGEY(0.038)Y(0.216)LINHLSK	5	KNIIKFIKNNKSLQNSNGEYYLINHLSKGIC	PF11_0079
PF3D7_1353100		Plasmodium exported protein, unknown function	Yes	1.09524	-1.22079	-0.125549	-1.19486	-1.24672	-0.125729	-0.12537	PF3D7_1353100	129	S	___1	SSSNS(0.005)HVES(0.992)NT(0.002)FQNK	9	TEVKHRRSSSNSHVESNTFQNKEETEVNADS	PF13_0275
PF3D7_1149000	Pf332	antigen 332, DBL-like protein	Yes	1.09477	1.93777	3.03254	1.98419	1.89134	3.08805	2.97702	PF3D7_1149000	2540	S	___1	IVEKEES(0.999)VT(0.001)EEIVRQEESTTEK	7	KEEESISEKIVEKEESVTEEIVRQEESTTEK	PF11_0506;PF11_0507
PF3D7_0708400	HSP90	heat shock protein 90	No	1.08711	-1.74059	-0.65348	-1.92647	-1.5547	-0.896269	-0.41069	PF3D7_0708400	198	S	___1	KHS(0.998)EFIS(0.002)FPIK	3	EYLEEKRIKDLVKKHSEFISFPIKLYCERQN	PF07_0029
PF3D7_0702500		Plasmodium exported protein, unknown function	Yes	1.08573	0.235973	1.3217	0.190601	0.281345	1.21398	1.42943	PF3D7_0702500	160	S	___3	NS(0.683)S(0.611)QHS(0.611)VGS(0.083)HS(0.011)VSSQEHKK	2	STENHLSGSNSDGRNSSQHSVGSHSVSSQEH	PF07_0008
PF3D7_1230800	WTAP	pre-mRNA-splicing regulator, putative	No	1.08441	0.650249	1.73466	0.611841	0.688656	1.63391	1.8354	PF3D7_1230800	312	S	___1	YGPHS(1)KYNK	5	DNNSKHEYSNKYGPHSKYNKHHSNKYDKYDQ	2277.t00297;MAL12P1.297;PFL1485w
PF3D7_1128600	NOT2	CCR4-NOT transcription complex subunit 2, putative	No	1.08436	0.145408	1.22977	0.16852	0.122295	1.1052	1.35434	PF3D7_1128600	313	T	___2	TIINDDVVYDINEEHT(1)S(1)ADEKIEK	16	TIINDDVVYDINEEHTSADEKIEKLRNDDIL	PF11_0297
PF3D7_0731100	PTP2	EMP1-trafficking protein	Yes	1.07471	2.58067	3.65539	2.58216	2.57919	3.58576	3.72501	PF3D7_0731100	496	S	___1	TSS(1)VSNSNR	3	NYRETDKKNNNLRTSSVSNSNRNENYLGASD	MAL7P1.172
PF3D7_0702500		Plasmodium exported protein, unknown function	Yes	1.07261	-2.90482	-1.83221	-2.81545	-2.99419	-1.99241	-1.67201	PF3D7_0702500	196	S	___3	NYS(0.001)LGNLS(0.958)T(0.03)GT(0.011)T(0.001)S(0.009)QGS(0.839)T(0.126)S(0.02)S(0.006)R	8	THDLPAGRNYSLGNLSTGTTSQGSTSSRHYS	PF07_0008
PF3D7_1039000	FIKK10.2	serine/threonine protein kinase, FIKK family	Yes	1.06158	-0.983122	0.078455	-0.959949	-1.00629	0.0915699	0.06534	PF3D7_1039000	354	S	___2	RFDGDQENIT(0.618)S(0.704)S(0.678)FER	11	DIKKRRFDGDQENITSSFERTQKSVKYDSDE	PF10_0380
PF3D7_1427900		conserved protein, unknown function	No	1.0518	1.84943	2.90123	1.95502	1.74384	2.79298	3.00948	PF3D7_1427900	31	S	___1	DATNEHAYES(1)LNELILDGK	10	HTIDGKDATNEHAYESLNELILDGKKLTSIK	PF14_0257
PF3D7_0113200		Plasmodium exported protein, unknown function	Yes	1.04947	-0.0656366	0.983829	0.0484314	-0.179705	0.95982	1.00784	PF3D7_0113200	191	S	___1	NQS(0.083)IS(0.937)S(0.98)NNNNNNNKEEEEECTK	6	KRNISISNKRNQSISSNNNNNNNKEEEEECT	MAL1P3.08;PFA0630c
PF3D7_0113200		Plasmodium exported protein, unknown function	Yes	1.04614	2.24353	3.28967	2.20638	2.28069	3.19821	3.38113	PF3D7_0113200	131	S	___1	NS(0.995)GLS(0.005)HMFSSEINK	2	SNVKKEEQKNKQTKNSGLSHMFSSEINKTQT	MAL1P3.08;PFA0630c
PF3D7_0702500		Plasmodium exported protein, unknown function	Yes	1.043	3.24761	4.29061	3.28663	3.20859	4.23269	4.34852	PF3D7_0702500	164	S	___1	NS(0.458)S(0.542)QHS(1)VGSHSVSSQEHKK	6	HLSGSNSDGRNSSQHSVGSHSVSSQEHKKEH	PF07_0008
PF3D7_1149000	Pf332	antigen 332, DBL-like protein	Yes	1.04267	-3.14193	-2.09925	-3.06225	-3.22161	-2.03715	-2.16136	PF3D7_1149000	1878	S	___1	IT(0.026)ENIPVERES(0.828)VT(0.146)EDIVQEPSLAQEVEQK	11	FQEEKITENIPVERESVTEDIVQEPSLAQEV	PF11_0506;PF11_0507
PF3D7_1149000	Pf332	antigen 332, DBL-like protein	Yes	1.03839	1.26205	2.30044	1.37958	1.14451	2.30525	2.29562	PF3D7_1149000	1532	T	___1	DQNVFEKEGS(0.057)VT(0.943)EQLVEEEK	12	DSVKDQNVFEKEGSVTEQLVEEEKGLINEDN	PF11_0506;PF11_0507
PF3D7_1224300	PABP1	polyadenylate-binding protein, putative	No	1.03792	-1.16675	-0.128829	-1.07523	-1.25828	-0.168829	-0.088829	PF3D7_1224300	156	S	___1	SYGFVHYEDEES(1)AKEAIEK	12	GKSKSYGFVHYEDEESAKEAIEKVNGVQLGS	2277.t00234;MAL12P1.234;PFL1170w
PF3D7_1001500	ETRAMP10	early transcribed membrane protein 10.1	Yes	1.03625	1.27559	2.31184	1.49511	1.05607	2.44292	2.18076	PF3D7_1001500	95	S	___2	NKS(1)QEGSTPLLTAK	3	DEGNDKKGSNDSKNKSQEGSTPLLTAKA___	PF10_0019
PF3D7_0702500		Plasmodium exported protein, unknown function	Yes	1.02778	-4.00372	-2.97594	-3.91397	-4.09348	-3.08407	-2.86781	PF3D7_0702500	171	S	___3	NS(0.046)S(0.044)QHS(0.845)VGS(0.187)HS(0.466)VS(0.54)S(0.873)QEHK	13	DGRNSSQHSVGSHSVSSQEHKKEHSTHDLPA	PF07_0008
PF3D7_0702500		Plasmodium exported protein, unknown function	Yes	1.02778	-4.00372	-2.97594	-3.91397	-4.09348	-3.08407	-2.86781	PF3D7_0702500	172	S	___3	NS(0.023)S(0.02)QHS(0.954)VGS(0.002)HS(0.001)VS(0.118)S(0.881)QEHK	14	GRNSSQHSVGSHSVSSQEHKKEHSTHDLPAG	PF07_0008
PF3D7_1039000	FIKK10.2	serine/threonine protein kinase, FIKK family	Yes	1.02776	-0.0535564	0.974206	-0.0409985	-0.0661144	0.888231	1.06018	PF3D7_1039000	355	S	___2	RFDGDQENITS(0.019)S(0.981)FER	12	IKKRRFDGDQENITSSFERTQKSVKYDSDES	PF10_0380
PF3D7_1246200	ACT1	actin I	No	1.02186	1.2977	2.31957	1.27242	1.32298	2.19292	2.44621	PF3D7_1246200	235	S	___1	LCYIALNFDEEMKTSEQS(0.146)S(0.854)DIEK	19	IALNFDEEMKTSEQSSDIEKSYELPDGNIIT	2277.t00443;MAL12P1.442;PFL2215w
PF3D7_0113200		Plasmodium exported protein, unknown function	Yes	1.01957	2.27523	3.2948	2.35475	2.19571	3.32453	3.26507	PF3D7_0113200	341	T	___2	SNNPPRQDS(0.454)QT(0.929)S(0.506)Y(0.108)Y(0.004)GR	11	RYTSRSNNPPRQDSQTSYYGRYTSRTNNQHR	MAL1P3.08;PFA0630c
PF3D7_0401800	PfD80	Plasmodium exported protein (PHISTb), unknown function	Yes	1.00678	2.80987	3.81666	2.85867	2.76107	3.54188	4.09143	PF3D7_0401800	68	S	___1	SSSCS(0.034)S(0.966)LAS(0.971)T(0.025)T(0.004)K	9	AEDDYKKSSSCSSLASTTKRSPSTASTSTSL	MAL4P1.16;PFD0080c
PF3D7_0500800	MESA	mature parasite-infected erythrocyte surface antigen	Yes	1.00622	-1.01963	-0.0134048	-1.04769	-0.991566	-0.0580101	0.0312004	PF3D7_0500800	342	S	___1	EGNKVS(1)GPYENSENSNVTSESEETK	6	VKITEESKDREGNKVSGPYENSENSNVTSES	MAL5P1.9;PFE0040c
PF3D7_1107300	PAIP1	polyadenylate-binding protein-interacting protein 1, putative	No	1.00612	-0.0194321	0.986691	-0.0606289	0.0217648	0.980871	0.99251	PF3D7_1107300	2622	S	___1	KS(1)DADKLK	2	INYNNSVSSNLEWRKSDADKLKGFFDSTRVV	PF11_0086
PF3D7_1039000	FIKK10.2	serine/threonine protein kinase, FIKK family	Yes	1.00336	0.417148	1.42051	0.439911	0.394384	1.35518	1.48584	PF3D7_1039000	353	T	___2	FDGDQENIT(0.997)S(0.141)S(0.861)FER	9	NDIKKRRFDGDQENITSSFERTQKSVKYDSD	PF10_0380
PF3D7_1353100		Plasmodium exported protein, unknown function	Yes	0.992188	0.913938	1.90613	0.9755	0.852375	1.75949	2.05276	PF3D7_1353100	123	S	___1	S(0.091)S(0.091)S(0.817)NS(0.001)HVESNTFQNK	3	GERTSYTEVKHRRSSSNSHVESNTFQNKEET	PF13_0275
PF3D7_0401800	PfD80	Plasmodium exported protein (PHISTb), unknown function	Yes	0.985268	5.202	6.18727	5.2977	5.10629	6.08053	6.294	PF3D7_0401800	279	S	___2	LPS(0.993)T(0.015)GS(0.971)T(0.02)IR	3	SPSTGSTSGSTTRLPSTGSTIRFPSTGSSRL	MAL4P1.16;PFD0080c
PF3D7_0708400	HSP90	heat shock protein 90	No	0.984938	1.12865	2.11359	1.24436	1.01294	1.85634	2.37083	PF3D7_0708400	349	S	___1	HFS(1)VEGQLEFK	3	SLTNDWEDHLAVKHFSVEGQLEFKALLFIPK	PF07_0029
PF3D7_0501300	SBP1	skeleton-binding protein 1	Yes	0.984118	-1.30977	-0.325655	-1.32251	-1.29704	-0.317579	-0.333731	PF3D7_0501300	325	T	___2	TQQNPQQNAQQNTQQNT(0.001)QQQS(0.444)T(0.538)T(0.509)KS(0.171)T(0.169)T(0.168)K	22	QNAQQNTQQNTQQQSTTKSTTKTVARET___	MAL5P1.14;PFE0065w
PF3D7_0501300	SBP1	skeleton-binding protein 1	Yes	0.984118	-1.30977	-0.325655	-1.32251	-1.29704	-0.317579	-0.333731	PF3D7_0501300	326	T	___2	TQQNPQQNAQQNTQQNT(0.001)QQQS(0.444)T(0.538)T(0.509)KS(0.171)T(0.169)T(0.168)K	23	NAQQNTQQNTQQQSTTKSTTKTVARET____	MAL5P1.14;PFE0065w
PF3D7_1149000	Pf332	antigen 332, DBL-like protein	Yes	0.983432	0.290443	1.27388	0.284231	0.296656	1.25519	1.29256	PF3D7_1149000	2176	S	___1	LINEVGETES(0.996)VT(0.003)EEIVQK	10	VVEEEKLINEVGETESVTEEIVQKEVSDAEE	PF11_0506;PF11_0507
PF3D7_0408300	ZRANB2	zinc finger Ran-binding domain-containing protein 2, putative	No	0.979468	0.580623	1.56009	0.80291	0.358335	1.62563	1.49455	PF3D7_0408300	201	S	___1	S(0.623)S(0.377)KYDDKYDR	1	EHIPDRGIEIKKYDRSSKYDDKYDRSSKYDD	MAL4P2.19;PFD0405c;PFD0405w
PF3D7_0311100		pre-mRNA splicing factor, putative	No	0.978667	-0.170192	0.808475	0.0507412	-0.391125	1.07631	0.54064	PF3D7_0311100	222	S	___1	KT(0.073)S(0.927)IER	3	KSDSYKKRPFNKRKTSIERSLSNKRYDEKTN	MAL3P4.20;PFC0465c
PF3D7_0113200		Plasmodium exported protein, unknown function	Yes	0.972147	1.34105	2.3132	1.40401	1.27809	2.29574	2.33065	PF3D7_0113200	339	S	___1	QDS(0.988)QT(0.01)S(0.002)YYGR	3	YSRYTSRSNNPPRQDSQTSYYGRYTSRTNNQ	MAL1P3.08;PFA0630c
PF3D7_0113200		Plasmodium exported protein, unknown function	Yes	0.970893	0.940058	1.91095	0.972391	0.907724	1.78272	2.03918	PF3D7_0113200	393	S	___2	HES(1)LHSYNIK	3	VVYNDKIRKSNNRHESLHSYNIKETPKKNKK	MAL1P3.08;PFA0630c
PF3D7_0113200		Plasmodium exported protein, unknown function	Yes	0.970893	0.940058	1.91095	0.972391	0.907724	1.78272	2.03918	PF3D7_0113200	396	S	___2	HES(1)LHS(0.998)Y(0.001)NIKET(0.001)PK	6	NDKIRKSNNRHESLHSYNIKETPKKNKKKSQ	MAL1P3.08;PFA0630c
PF3D7_0702500		Plasmodium exported protein, unknown function	Yes	0.970262	-2.98288	-2.01262	-3.09827	-2.86749	-1.98023	-2.045	PF3D7_0702500	167	S	___1	NS(0.534)S(0.491)QHS(0.957)VGS(0.854)HS(0.145)VS(0.016)S(0.004)QEHK	9	GSNSDGRNSSQHSVGSHSVSSQEHKKEHSTH	PF07_0008
PF3D7_1128600	NOT2	CCR4-NOT transcription complex subunit 2, putative	No	0.969398	0.679288	1.64869	0.668701	0.689875	1.53927	1.7581	PF3D7_1128600	314	S	___2	TIINDDVVYDINEEHT(1)S(1)ADEKIEK	17	IINDDVVYDINEEHTSADEKIEKLRNDDILK	PF11_0297
PF3D7_1246200	ACT1	actin I	No	0.968758	-1.59683	-0.62807	-2.00519	-1.18847	-0.718399	-0.537741	PF3D7_1246200	15	S	___1	GEEDVQALVVDNGS(1)GNVK	14	_MGEEDVQALVVDNGSGNVKAGVAGDDAPRS	2277.t00443;MAL12P1.442;PFL2215w
PF3D7_0401800	PfD80	Plasmodium exported protein (PHISTb), unknown function	Yes	0.964313	-3.3557	-2.39138	-3.29572	-3.41568	-2.41346	-2.36931	PF3D7_0401800	446	T	___1	LIDLEDGFT(0.996)DT(0.004)QYIR	9	DVELNKKLIDLEDGFTDTQYIRKLYSLINEN	MAL4P1.16;PFD0080c
PF3D7_0919800		TLD domain-containing protein	No	0.963818	-5.20236	-4.23854	-5.76462	-4.64009	-4.16422	-4.31286	PF3D7_0919800	943	S	___1	S(0.117)NS(0.117)S(0.117)DIHS(0.65)NNNNNK	8	ENTLNDHKSNSSDIHSNNNNNKNNYDNNNNY	PFI0970c
PF3D7_1238100		calcyclin binding protein, putative	No	0.963758	-2.35416	-1.3904	-2.53877	-2.16956	-1.49655	-1.28426	PF3D7_1238100	149	S	___1	KDS(0.998)VHVT(0.002)LVK	3	DKIIPNKCSFKVKKDSVHVTLVKQENKHWEN	2277.t00369;MAL12P1.367;PFL1845c
PF3D7_0517400	FACT-L	FACT complex subunit SPT16, putative	No	0.963408	-2.29161	-1.3282	-2.47444	-2.10877	-1.20691	-1.44949	PF3D7_0517400	2	S	___1	S(1)EALDIDNAK	1	______________MSEALDIDNAKAKIGLV	MAL5P1.174;PFE0870w
PF3D7_0801000		Plasmodium exported protein (PHISTc), unknown function	Yes	0.962478	6.57863	7.54111	6.53848	6.61877	7.41552	7.66669	PF3D7_0801000	158	S	___1	KGS(1)LGFDSFK	3	NDQNSRNNTPNLRKGSLGFDSFKKLELGTLN	PF08_0137
PF3D7_1140700		conserved Plasmodium protein, unknown function	No	0.957298	-2.08843	-1.13113	-1.95314	-2.22371	-1.08468	-1.17758	PF3D7_1140700	1107	Y	___1	LTES(0.004)EY(0.967)DS(0.025)VY(0.003)ET(0.001)LINR	6	NNIRKSYINKLTESEYDSVYETLINRYCKNT	PF11_0418
PF3D7_1136500.2-p1		casein kinase 1		0.954786	-2.17915	-1.22437	-2.15443	-2.20387	-1.18499	-1.26374	PF3D7_1136500.2-p1;PF3D7_1136500	19;19	S	___1	KLGS(0.118)GS(0.882)FGDIYVAK	6	RVANKYALGKKLGSGSFGDIYVAKDIVTMEE
PF3D7_1016700		Plasmodium exported protein (PHISTc), unknown function	Yes	0.947312	-1.35871	-0.4114	-1.29261	-1.42481	-0.40263	-0.42017	PF3D7_1016700	521	S	___1	IDLVDS(0.199)S(0.199)DEEFENRY(0.028)NS(0.525)NS(0.021)S(0.023)T(0.005)QK	17	DLVDSSDEEFENRYNSNSSTQKKKKKRSKVP	PF10_0162
PF3D7_0501300	SBP1	skeleton-binding protein 1	Yes	0.946592	-1.37049	-0.423895	-1.44135	-1.29963	-0.471689	-0.376101	PF3D7_0501300	328	S	___2	TQQNPQQNAQQNTQQNTQQQS(0.019)T(0.013)T(0.103)KS(0.851)T(0.013)T(0.002)K	25	QQNTQQNTQQQSTTKSTTKTVARET______	MAL5P1.14;PFE0065w
PF3D7_1478600	PTP3	EMP1-trafficking protein	Yes	0.945582	-0.714562	0.23102	-0.675129	-0.753996	0.12801	0.33403	PF3D7_1478600	216	S	___1	IDNLS(1)NKPTDLRR	5	ESGLYGPMKGKIDNLSNKPTDLRRTNNTDYG	PF14_0758
PF3D7_1362700		conserved Plasmodium protein, unknown function	No	0.945217	-1.33867	-0.393455	-1.24118	-1.43616	-0.31963	-0.467279	PF3D7_1362700	702	S	___1	NSLINSNIDDCT(0.001)EPYS(0.999)DVNKT(0.001)YQYK	16	NSLINSNIDDCTEPYSDVNKTYQYKNESIKN	MAL13P1.313;PF13_0332
PF3D7_0702500		Plasmodium exported protein, unknown function	Yes	0.944999	4.74086	5.68586	4.7976	4.68411	5.48503	5.88668	PF3D7_0702500	211	S	___1	HYS(1)LGGQPSSSGR	3	STGTTSQGSTSSRHYSLGGQPSSSGRSFSGS	PF07_0008
PF3D7_0922500	PGK	phosphoglycerate kinase	No	0.940207	-1.71584	-0.775635	-1.65706	-1.77463	-0.89724	-0.65403	PF3D7_0922500	319	S	___1	S(0.998)IENY(0.002)KDVILT(0.001)SK	1	EGIPDNWMGLDAGPKSIENYKDVILTSKTVI	PFI1105w
PF3D7_0220100		DnaJ protein, putative	Yes	0.938793	2.44752	3.38632	2.57188	2.32316	3.28629	3.48634	PF3D7_0220100	567	S	___1	YDS(0.994)S(0.006)DEPENSK	3	KNNDVLEIMDIIRYDSSDEPENSKNIGKKKK	PF02_0188;PFB0920w
PF3D7_0307200		60S ribosomal protein L7, putative	No	0.937102	0.069088	1.00619	0.0516415	0.0865345	0.9352	1.07718	PF3D7_0307200	66	S	___1	YEEEYES(1)ERKK	7	NDLRQRTLRYEEEYESERKKIIELKREARKN	MAL3P2.29;PFC0300c
PF3D7_0818900	HSP70	heat shock protein 70	No	0.936913	2.49395	3.43086	2.70938	2.27851	3.44152	3.4202	PF3D7_0818900	554	S	___1	NS(1)LENYCYGVK	2	KAEDEENRKRIEARNSLENYCYGVKSSLEDQ	PF08_0054
PF3D7_0936800		Plasmodium exported protein (PHISTc), unknown function	Yes	0.934477	4.08095	5.01542	4.1282	4.0337	4.86944	5.16141	PF3D7_0936800	318	S	___1	VQPPKS(1)QQQK	6	VQPPKVQQQKVQPPKSQQQKVQPPKSQQQKV	PFI1780w
PF3D7_0936800		Plasmodium exported protein (PHISTc), unknown function	Yes	0.931598	0.341892	1.27349	0.412251	0.271534	1.07604	1.47094	PF3D7_0936800	74	S	___1	SHS(0.985)T(0.014)SDPKKNEEK	3	LAEASPEEHNNLRSHSTSDPKKNEEKSLSDE	PFI1780w
PF3D7_0702500		Plasmodium exported protein, unknown function	Yes	0.931458	0.227728	1.15919	0.18741	0.268045	1.18723	1.13114	PF3D7_0702500	197	T	___3	NYSLGNLS(0.941)T(0.941)GT(0.083)T(0.027)S(0.008)QGSTSSR	9	HDLPAGRNYSLGNLSTGTTSQGSTSSRHYSL	PF07_0008
PF3D7_1466900		rhoptry protein, putative	No	0.931433	-1.48107	-0.54964	-1.40523	-1.55692	-0.675619	-0.42366	PF3D7_1466900	442	S	___1	QEEEYKS(1)LLDELENENNEWKEK	7	KEEQEIYIKQEEEYKSLLDELENENNEWKEK	PF14_0637
PF3D7_1149000	Pf332	antigen 332, DBL-like protein	Yes	0.931173	0.363092	1.29427	0.24576	0.480425	1.14623	1.4423	PF3D7_1149000	132	S	___1	GIKDET(0.114)FS(0.886)RENGLDVCK	8	TMLNEIEKGIKDETFSRENGLDVCKSQCEER	PF11_0506;PF11_0507
PF3D7_1107300	PAIP1	polyadenylate-binding protein-interacting protein 1, putative	No	0.930233	-0.469638	0.460595	-0.6553	-0.283976	0.598061	0.32313	PF3D7_1107300	1308	S	___1	RGS(1)NIK	3	LNNNKYHQNHSDRRGSNIKNAESNTNKMNEK	PF11_0086
PF3D7_0401800	PfD80	Plasmodium exported protein (PHISTb), unknown function	Yes	0.928807	5.11099	6.0398	5.21233	5.00965	5.9387	6.1409	PF3D7_0401800	288	S	___2	FPS(0.996)T(0.204)GS(0.785)S(0.015)RLEDYEK	3	STTRLPSTGSTIRFPSTGSSRLEDYEKEGSN	MAL4P1.16;PFD0080c
PF3D7_1357100		elongation factor 1-alpha	No	0.926443	-2.36366	-1.43722	-2.47628	-2.25105	-1.57276	-1.30168	PF3D7_1357100;PF3D7_1357000	192;192	S	___1	VGYQADKVDFIPIS(1)GFEGDNLIEK	14	KKVGYQADKVDFIPISGFEGDNLIEKSDKTP	PF13_0305
PF3D7_1460700	RPL27	60S ribosomal protein L27	No	0.925162	1.06888	1.99405	1.11513	1.02263	1.96893	2.01916	PF3D7_1460700	98	S	___1	YQVANDFDIKS(1)LAS(1)DDVLK	14	TRYQVANDFDIKSLASDDVLKSKNKKKEVKK	PF14_0579
PF3D7_1478600	PTP3	EMP1-trafficking protein	Yes	0.923058	1.55378	2.47684	1.4914	1.61616	2.3664	2.58727	PF3D7_1478600	680	S	___1	SIPNKLDS(1)QNGK	8	GKNEKNEKSIPNKLDSQNGKNEKNEKSIPNK	PF14_0758
PF3D7_1201100		RESA-like protein with PHIST and DnaJ domains	Yes	0.920444	-0.517258	0.403186	-0.45715	-0.577366	0.198792	0.60758	PF3D7_1201100	464	S	___1	YVFDYGSFEEKS(0.15)ES(0.85)EKSLDISK	14	SKYVFDYGSFEEKSESEKSLDISKNFIFSEE	2277.t00011;MAL12P1.11;PFL0055c
PF3D7_1002100	PTP5	EMP1-trafficking protein	Yes	0.916908	-4.40085	-3.48394	-4.40556	-4.39614	-3.66539	-3.30249	PF3D7_1002100	165	S	___1	TDITNEQGTSADNNTTENNVSTSQVDEQPEAS(0.747)T(0.189)S(0.064)GVER	32	ENNVSTSQVDEQPEASTSGVERMKERSNLFA	PF10_0025
PF3D7_0708400	HSP90	heat shock protein 90	No	0.916042	1.02077	1.93681	1.00658	1.03495	1.75997	2.11365	PF3D7_0708400	421	S	___1	GVVDSEDLPLNIS(0.039)RES(0.961)LQQNK	16	GVVDSEDLPLNISRESLQQNKILKVIKKNLI	PF07_0029
PF3D7_0113200		Plasmodium exported protein, unknown function	Yes	0.915873	3.73905	4.65492	3.77103	3.70707	4.64594	4.6639	PF3D7_0113200	393	S	___1	HES(1)LHSYNIK	3	VVYNDKIRKSNNRHESLHSYNIKETPKKNKK	MAL1P3.08;PFA0630c
PF3D7_1149000	Pf332	antigen 332, DBL-like protein	Yes	0.915812	1.1328	2.04862	1.1837	1.08191	2.08069	2.01654	PF3D7_1149000	1530	S	___1	EGS(1)VTEQLVEEEK	3	EEDSVKDQNVFEKEGSVTEQLVEEEKGLINE	PF11_0506;PF11_0507
PF3D7_1001500	ETRAMP10	early transcribed membrane protein 10.1	Yes	0.911742	2.85472	3.76647	3.00241	2.70704	3.88122	3.65171	PF3D7_1001500	95	S	___1	NKS(1)QEGSTPLLTAK	3	DEGNDKKGSNDSKNKSQEGSTPLLTAKA___	PF10_0019
PF3D7_1027300	nPrx	peroxiredoxin	No	0.910247	0.110768	1.02102	-0.197948	0.419485	1.11644	0.925591	PF3D7_1027300	323	S	___1	S(0.686)GKGS(0.306)VS(0.007)S(0.001)SNK	1	NKNQNLKDLKKKNVKSGKGSVSSSNKKLPKG	PF10_0268
PF3D7_0202000	KAHRP	erythrocyte membrane protein 1, PfEMP1	Yes	0.907488	2.78662	3.69411	2.63374	2.9395	3.84306	3.54516	PF3D7_0202000;PF3D7_1255200	550;1774	S	___1	EAS(0.262)T(0.88)S(0.85)KEAT(0.008)K	5	AAEGATKGATKEASTSKEATKEASTSKEATK	PF02_0020;PFB0100c
PF3D7_1401200		Plasmodium exported protein, unknown function	Yes	0.906282	-0.191332	0.714951	-0.22683	-0.155834	0.68568	0.744221	PF3D7_1401200	59	S	___1	INS(0.999)KY(0.001)DELR	3	HIRSLAESYKQYKINSKYDELRTLGASSPQK	PF14_0014
PF3D7_1224300	PABP1	polyadenylate-binding protein, putative	No	0.904511	0.214314	1.11882	0.210611	0.218016	1.10108	1.13657	PF3D7_1224300	56	S	___1	S(1)LGYAYVNYHNLADAER	1	HVSSIRVCRDSVTRKSLGYAYVNYHNLADAE	2277.t00234;MAL12P1.234;PFL1170w
PF3D7_0730900	PTP4	EMP1-trafficking protein	Yes	0.896702	3.25753	4.15423	3.41511	3.09995	3.98448	4.32398	PF3D7_0730900	1167	T	___1	HLT(1)DEENKVEK	3	ETKKDIPQNKNYKHLTDEENKVEKEMSIHDG	MAL7P1.171
PF3D7_0401800	PfD80	Plasmodium exported protein (PHISTb), unknown function	Yes	0.895898	1.89909	2.79498	1.84569	1.95248	2.70882	2.88115	PF3D7_0401800	279	S	___3	LPS(0.993)T(0.015)GS(0.971)T(0.02)IR	3	SPSTGSTSGSTTRLPSTGSTIRFPSTGSSRL	MAL4P1.16;PFD0080c
PF3D7_0831700	HSP70x	heat shock protein 70	Yes	0.895192	0.809573	1.70477	0.792921	0.826225	1.63713	1.7724	PF3D7_0831700	296	T	___1	LRT(1)QCEK	3	GKDVSKNSKSLRRLRTQCEKAKRVLSSSAQA	MAL7P1.228
PF3D7_1435600		conserved Plasmodium protein, unknown function	No	0.893842	-2.38592	-1.49207	-2.45079	-2.32104	-1.49701	-1.48714	PF3D7_1435600;PF3D7_1019300	1711;329	S	___1	S(1)LNVHK	1	IKHSRQVSSSVNSSKSLNVHKGYETNKNEKK	PF14_0337
PF3D7_0501400	FIRA	interspersed repeat antigen	Yes	0.891598	-3.24651	-2.35491	-3.1836	-3.30941	-2.47986	-2.22996	PF3D7_0501400	1192	S	___2	AS(0.043)EGDNHS(0.546)LS(0.622)S(0.748)LS(0.038)EET(0.004)EEK	10	HDDEKKASEGDNHSLSSLSEETEEKSHTKKK	MAL5P1.15;PFE0070w
PF3D7_0501400	FIRA	interspersed repeat antigen	Yes	0.891598	-3.24651	-2.35491	-3.1836	-3.30941	-2.47986	-2.22996	PF3D7_0501400	1193	S	___2	AS(0.043)EGDNHS(0.546)LS(0.622)S(0.748)LS(0.038)EET(0.004)EEK	11	DDEKKASEGDNHSLSSLSEETEEKSHTKKKK	MAL5P1.15;PFE0070w
PF3D7_0726100		Plasmodium exported protein, unknown function	Yes	0.891247	-1.37648	-0.485235	-1.32299	-1.42998	-0.54224	-0.42823	PF3D7_0726100	489	T	___1	YS(0.013)NT(0.761)S(0.222)S(0.002)S(0.001)IGSFSK	4	KHLLSNTKTRRKYSNTSSSIGSFSKSTTNIS	PF07_0107
PF3D7_0818200	14-3-3I	14-3-3 protein	No	0.891212	0.587092	1.4783	0.53459	0.639595	1.33297	1.62364	PF3D7_0818200	148	S	___1	YISEFS(1)CDEGK	6	YYKMKGDYYRYISEFSCDEGKKEASNCAQEA	MAL8P1.69
PF3D7_0202000	KAHRP	knob-associated histidine-rich protein	Yes	0.887842	6.1382	7.02605	6.14506	6.13135	6.9674	7.08469	PF3D7_0202000	598	S	___1	GAS(0.991)T(0.009)TAGSTTGATTGANAVQSK	3	ATKEASTTEGATKGASTTAGSTTGATTGANA	PF02_0020;PFB0100c
PF3D7_0113200		Plasmodium exported protein, unknown function	Yes	0.887218	2.45566	3.34288	2.57499	2.33633	3.49985	3.18591	PF3D7_0113200	180	S	___1	NIS(1)ISNKR	3	QTNKSKNNKKDKRNISISNKRNQSISSNNNN	MAL1P3.08;PFA0630c
PF3D7_1149000	Pf332	antigen 332, DBL-like protein	Yes	0.882878	-2.74287	-1.85999	-2.86975	-2.61598	-1.96973	-1.75025	PF3D7_1149000	4847	S	___1	STTQEILEET(0.022)QS(0.955)VNEEIVEEERDT(0.022)DEVLKEK	12	EEEKSTTQEILEETQSVNEEIVEEERDTDEV	PF11_0506;PF11_0507
PF3D7_1140700		conserved Plasmodium protein, unknown function	No	0.882447	-0.881217	0.00123024	-0.872509	-0.889925	-0.10117	0.10363	PF3D7_1140700	1615	S	___1	SEQDHINDDDNNINS(0.962)Y(0.038)DDES(1)DVNFNNKK	20	HINDDDNNINSYDDESDVNFNNKKNDYKGKR	PF11_0418
PF3D7_0309500	AS	asparagine synthetase [glutamine-hydrolyzing], putative	No	0.881903	-0.541912	0.339991	-0.896299	-0.187525	0.609921	0.0700607	PF3D7_0309500	591	S	___1	SVLGIHRHS(1)K	9	NADQSGRSVLGIHRHSKQFDDVKCIPLQNQE	MAL3P3.14;PFC0395w
PF3D7_0702500		Plasmodium exported protein, unknown function	Yes	0.878848	-0.714792	0.164056	-0.784069	-0.645515	0.0687714	0.25934	PF3D7_0702500	242	S	___2	YNTSNLASSSTTES(0.033)S(0.967)VSGLNTNEAHV	15	KYNTSNLASSSTTESSVSGLNTNEAHV____	PF07_0008
PF3D7_0401800	PfD80	Plasmodium exported protein (PHISTb), unknown function	Yes	0.878613	0.313353	1.19197	0.245371	0.381334	1.1052	1.27873	PF3D7_0401800	171	S	___3	S(0.001)AS(0.999)T(0.001)AS(0.979)T(0.02)AS(0.001)AASAASTTR	3	STTRSASTASTARSASTASTASAASAASTTR	MAL4P1.16;PFD0080c
PF3D7_0301700		Plasmodium exported protein, unknown function	Yes	0.877083	-1.03777	-0.160685	-1.03514	-1.0404	-0.203449	-0.11792	PF3D7_0301700	149	T	___1	VTVLEPQT(1)ENS(1)EDEENYEK	8	EYYNSTPRVTVLEPQTENSEDEENYEKTIVD	MAL3P8.15;PFC0085c
PF3D7_0702500		Plasmodium exported protein, unknown function	Yes	0.875522	-3.56922	-2.6937	-3.69767	-3.44077	-2.99455	-2.39285	PF3D7_0702500	211	S	___3	HYS(1)LGGQPSSSGR	3	STGTTSQGSTSSRHYSLGGQPSSSGRSFSGS	PF07_0008
PF3D7_0401800	PfD80	Plasmodium exported protein (PHISTb), unknown function	Yes	0.873618	-1.7563	-0.882685	-1.69792	-1.81469	-1.08078	-0.684589	PF3D7_0401800	169	S	___2	S(0.915)AS(0.064)T(0.019)AS(0.002)T(0.001)ASAASAAS(0.85)T(0.146)T(0.004)R	1	AASTTRSASTASTARSASTASTASAASAAST	MAL4P1.16;PFD0080c
PF3D7_1478600	PTP3	EMP1-trafficking protein	Yes	0.872957	3.42192	4.29488	3.53636	3.30749	4.27928	4.31048	PF3D7_1478600;PF3D7_1477000	1171;922	S	___1	CGIDVES(1)DIDIETETNPLK	7	KVKDIVSKKCGIDVESDIDIETETNPLKWHQ	PF14_0758
PF3D7_0424700	FIKK4.2	serine/threonine protein kinase, FIKK family	Yes	0.869498	0.541323	1.41082	0.621601	0.461044	1.31679	1.50485	PF3D7_0424700	139	S	___2	RNS(1)LY(1)K	3	EEIRKYLSDKTKKRNSLYKYKLKGSKGKSVK	MAL4P1.230;PFD1175w
PF3D7_0424700	FIKK4.2	serine/threonine protein kinase, FIKK family	Yes	0.869498	0.541323	1.41082	0.621601	0.461044	1.31679	1.50485	PF3D7_0424700	141	Y	___2	RNS(1)LY(1)K	5	IRKYLSDKTKKRNSLYKYKLKGSKGKSVKNI	MAL4P1.230;PFD1175w
PF3D7_1149000	Pf332	antigen 332, DBL-like protein	Yes	0.863578	0.716963	1.58054	0.752331	0.681595	1.55611	1.60497	PF3D7_1149000	209	S	___1	KDEYDIQS(1)R	8	FKDWLETKKDEYDIQSRVFEKKYANDNKSKH	PF11_0506;PF11_0507
PF3D7_1149000	Pf332	antigen 332, DBL-like protein	Yes	0.862898	1.47498	2.33788	1.61459	1.33537	2.28945	2.3863	PF3D7_1149000	1918	S	___1	IIPEVS(0.998)VT(0.002)ENVVEK	6	IEETKLANEKIIPEVSVTENVVEKEGLDTEE	PF11_0506;PF11_0507
PF3D7_1121100		conserved Plasmodium protein, unknown function	No	0.858972	-0.793647	0.0653248	-0.888988	-0.698305	0.0549202	0.0757294	PF3D7_1121100	1516	S	___1	RLS(1)FIESK	3	NDTISTVLDNLTKRLSFIESKIKEKDFGLDI	PF11_0218
PF3D7_0702500		Plasmodium exported protein, unknown function	Yes	0.858962	4.07632	4.93528	4.06249	4.09015	4.86669	5.00387	PF3D7_0702500	217	S	___1	HYSLGGQPS(0.95)S(0.049)S(0.001)GR	9	QGSTSSRHYSLGGQPSSSGRSFSGSKYNTSN	PF07_0008
PF3D7_0113200		Plasmodium exported protein, unknown function	Yes	0.858833	-2.79589	-1.93706	-2.89899	-2.69279	-1.91369	-1.96043	PF3D7_0113200	341	T	___1	SNNPPRQDS(0.454)QT(0.929)S(0.506)Y(0.108)Y(0.004)GR	11	RYTSRSNNPPRQDSQTSYYGRYTSRTNNQHR	MAL1P3.08;PFA0630c
PF3D7_0831700	HSP70x	heat shock protein 70	Yes	0.858753	3.36542	4.22417	3.46924	3.26159	4.19764	4.2507	PF3D7_0831700	108	S	___1	KFS(0.998)ET(0.001)T(0.001)VQSDMK	3	ENTVFDAKRLIGRKFSETTVQSDMKHWPFTV	MAL7P1.228
PF3D7_0401800	PfD80	Plasmodium exported protein (PHISTb), unknown function	Yes	0.858256	0.221398	1.07965	0.169611	0.273186	1.01087	1.14844	PF3D7_0401800	289	T	___2	LPS(0.877)T(0.122)GSTIRFPS(0.227)T(0.757)GS(0.014)S(0.002)R	13	TTRLPSTGSTIRFPSTGSSRLEDYEKEGSNV	MAL4P1.16;PFD0080c
PF3D7_0401800	PfD80	Plasmodium exported protein (PHISTb), unknown function	Yes	0.856607	1.80597	2.66258	1.86138	1.75056	2.48801	2.83714	PF3D7_0401800	183	S	___2	SASTASTASAASAAS(0.962)T(0.036)T(0.001)R	15	RSASTASTASAASAASTTRSASAASTTRSAS	MAL4P1.16;PFD0080c
PF3D7_1303400	LisH	LisH domain-containing protein, putative	No	0.856412	-2.9442	-2.08779	-2.8993	-2.98911	-1.94754	-2.22804	PF3D7_1303400	532	S	___1	RNS(1)KVESK	3	KKSVKGINKKDKKRNSKVESKKEQAFVKSVA	PF13_0018
PF3D7_1246200	ACT1	actin I	No	0.850562	-2.35344	-1.50288	-2.52438	-2.1825	-1.68841	-1.31734	PF3D7_1246200	34	S	___1	SVFPS(1)IVGRPK	5	KAGVAGDDAPRSVFPSIVGRPKNPGIMVGME	2277.t00443;MAL12P1.442;PFL2215w
PF3D7_0702400	SEMP1	small exported membrane protein 1	Yes	0.845843	-5.79694	-4.95109	-6.71559	-4.87829	-4.53923	-5.36296	PF3D7_0702400	33	S	___1	NPSQS(0.999)GPYRHHGPQGR	5	NTQEKKFNPTRNPSQSGPYRHHGPQGRTPYM	PF07_0007
PF3D7_0702500		Plasmodium exported protein, unknown function	Yes	0.845348	-3.17626	-2.33091	-3.30187	-3.05064	-2.42839	-2.23343	PF3D7_0702500	237	S	___2	YNTSNLASS(0.006)S(0.991)T(0.002)TESSVSGLNTNEAHV	10	SFSGSKYNTSNLASSSTTESSVSGLNTNEAH	PF07_0008
PF3D7_1246200	ACT1	actin I	No	0.843113	-2.33272	-1.48961	-2.28295	-2.3825	-1.65083	-1.32839	PF3D7_1246200	266	S	___1	CPEALFQPS(1)FLGK	9	VGNERFRCPEALFQPSFLGKEAAGIHTTTFN	2277.t00443;MAL12P1.442;PFL2215w
PF3D7_1410400	RAP1	rhoptry-associated protein 1	No	0.842272	3.85396	4.69623	3.91163	3.7963	4.62306	4.76941	PF3D7_1410400	104	S	___1	S(1)ASAAAILEEDDSK	1	SNKSSKKGHGRSRVRSASAAAILEEDDSKDD	PF14_0102
PF3D7_0202000	KAHRP	knob-associated histidine-rich protein	Yes	0.840668	0.713862	1.55453	0.70134	0.726385	1.67235	1.43671	PF3D7_0202000	590	T	___1	EAS(0.773)T(0.231)T(0.996)EGATK	5	KEASTSKGATKEASTTEGATKGASTTAGSTT	PF02_0020;PFB0100c
PF3D7_0702500		Plasmodium exported protein, unknown function	Yes	0.840177	-1.31247	-0.472295	-1.42831	-1.19663	-0.550779	-0.39381	PF3D7_0702500	167	S	___3	NS(0.534)S(0.491)QHS(0.957)VGS(0.854)HS(0.145)VS(0.016)S(0.004)QEHK	9	GSNSDGRNSSQHSVGSHSVSSQEHKKEHSTH	PF07_0008
PF3D7_1442900	ARFGEF	protein transport protein SEC7, putative	No	0.839149	-0.590578	0.24857	-0.52305	-0.658106	0.141571	0.35557	PF3D7_1442900	3296	S	___1	DSTQEKEDNIKDS(0.87)T(0.13)QDIEDNVEDLIEEK	13	NIKDSTQEKEDNIKDSTQDIEDNVEDLIEEK	PF14_0407
PF3D7_0500800	MESA	mature parasite-infected erythrocyte surface antigen	Yes	0.838772	-2.39893	-1.56015	-2.52449	-2.27337	-1.7002	-1.42011	PF3D7_0500800	348	S	___3	VS(0.001)GPY(0.004)ENS(0.931)ENS(0.851)NVT(0.172)S(0.04)ES(0.002)EETKK	8	SKDREGNKVSGPYENSENSNVTSESEETKKL	MAL5P1.9;PFE0040c
PF3D7_0500800	MESA	mature parasite-infected erythrocyte surface antigen	Yes	0.838772	-2.39893	-1.56015	-2.52449	-2.27337	-1.7002	-1.42011	PF3D7_0500800	351	S	___3	VSGPY(0.002)ENS(0.894)ENS(0.887)NVT(0.492)S(0.517)ES(0.105)EET(0.104)KK	11	REGNKVSGPYENSENSNVTSESEETKKLAEK	MAL5P1.9;PFE0040c
PF3D7_0500800	MESA	mature parasite-infected erythrocyte surface antigen	Yes	0.838772	-2.39893	-1.56015	-2.52449	-2.27337	-1.7002	-1.42011	PF3D7_0500800	355	S	___3	VSGPYENSENSNVT(0.001)S(0.999)ESEETK	15	KVSGPYENSENSNVTSESEETKKLAEKEENE	MAL5P1.9;PFE0040c
PF3D7_1401200		Plasmodium exported protein, unknown function	Yes	0.835423	0.771423	1.60685	0.785131	0.757715	1.58162	1.63207	PF3D7_1401200	135	S	___1	KMPS(1)KYDYLR	4	DLRRFGVPTQKKKMPSKYDYLRTLKEQNVNN	PF14_0014
PF3D7_0826700	RACK1	receptor for activated c kinase	No	0.834097	0.812213	1.64631	0.877541	0.746885	1.5772	1.71542	PF3D7_0826700	214	S	___1	NLEGHTGVLNTVTIS(0.003)PDGS(0.985)LCAS(0.012)GGK	19	GHTGVLNTVTISPDGSLCASGGKDGVAKLWD	PF08_0019
PF3D7_0113200		Plasmodium exported protein, unknown function	Yes	0.833648	-0.664767	0.16888	-0.507549	-0.821985	0.224831	0.11293	PF3D7_0113200	190	S	___1	NQS(0.002)IS(0.977)S(0.021)NNNNNNNKEEEEECTK	5	DKRNISISNKRNQSISSNNNNNNNKEEEEEC	MAL1P3.08;PFA0630c
PF3D7_0201900	EMP3	erythrocyte membrane protein 3	Yes	0.833162	2.19547	3.02864	2.23773	2.15322	2.95387	3.1034	PF3D7_0201900	1360	S	___1	NTPS(1)EGQQNTGLK	4	TPNERQQNTGLKNTPSEGQQNTGLKNTPSEG	PF02_0019;PFB0095c
PF3D7_1149000	Pf332	antigen 332, DBL-like protein	Yes	0.832967	-4.34655	-3.51358	-4.28015	-4.41294	-3.67298	-3.35418	PF3D7_1149000	5212	S	___1	S(0.979)IT(0.015)EEVS(0.006)VEEDIITDK	1	DVEEGSVAENVKETKSITEEVSVEEDIITDK	PF11_0506;PF11_0507
PF3D7_1442900	ARFGEF	protein transport protein SEC7, putative	No	0.832313	-1.00076	-0.168445	-1.31136	-0.690155	-0.12232	-0.214569	PF3D7_1442900	1117	S	___1	NS(0.5)S(0.5)NIHK	2	DEKISANDQKKNNKNSSNIHKNISDDHSVLN	PF14_0407
PF3D7_1149000	Pf332	antigen 332, DBL-like protein	Yes	0.828892	-0.902807	-0.0739155	-0.965969	-0.839645	-0.19087	0.0430393	PF3D7_1149000	407	S	___1	NIDVNGS(1)KDEYSPETESANSK	7	IPRGDNVPRNIDVNGSKDEYSPETESANSKI	PF11_0506;PF11_0507
PF3D7_1436300	PTEX150	translocon component PTEX150	No	0.827868	1.15968	1.98755	1.33502	0.984344	1.92575	2.04935	PF3D7_1436300	817	S	___1	KNS(1)EYDLYDDDDKEGGNFK	3	IYDTKENLIKFLKKNSEYDLYDDDDKEGGNF	PF14_0344;Pf112
PF3D7_1224300	PABP1	polyadenylate-binding protein, putative	No	0.822923	-2.08912	-1.26619	-1.78526	-2.39297	-1.2678	-1.26459	PF3D7_1224300	533	S	___1	EQRLS(1)R	5	KPLYVGLAEKREQRLSRLQQRFRMHPIRHHM	2277.t00234;MAL12P1.234;PFL1170w
PF3D7_0301600	GEXP21	Plasmodium exported protein (hyp1), unknown function	Yes	0.819292	-2.37484	-1.55554	-2.47742	-2.27225	-1.43669	-1.6744	PF3D7_0301600	620	S	___2	SYENEFNLSTDRRNS(0.999)ES(0.001)SSR	15	RSYENEFNLSTDRRNSESSSRIHVDDENYKR	MAL3P8.14;PFC0080c
PF3D7_0301600	GEXP21	Plasmodium exported protein (hyp1), unknown function	Yes	0.819292	-2.37484	-1.55554	-2.47742	-2.27225	-1.43669	-1.6744	PF3D7_0301600	622	S	___2	SYENEFNLST(0.001)DRRNS(0.993)ES(0.51)S(0.427)S(0.068)R	17	YENEFNLSTDRRNSESSSRIHVDDENYKRLK	MAL3P8.14;PFC0080c
PF3D7_0517300	SR1	serine/arginine-rich splicing factor 1	No	0.816737	-0.0336914	0.783046	-0.0765686	0.00918579	0.669111	0.89698	PF3D7_0517300	207	S	___2	S(0.354)Y(0.037)S(0.607)S(0.003)RS(0.992)Y(0.003)S(0.003)R	3	DDGGYGRYNSRHRSYSSRSYSRSGKRSYTRS	MAL5P1.173;PFE0865c
PF3D7_0517300	SR1	serine/arginine-rich splicing factor 1	No	0.816737	-0.0336914	0.783046	-0.0765686	0.00918579	0.669111	0.89698	PF3D7_0517300	210	S	___2	S(0.354)Y(0.037)S(0.607)S(0.003)RS(0.992)Y(0.003)S(0.003)R	6	GYGRYNSRHRSYSSRSYSRSGKRSYTRSRSR	MAL5P1.173;PFE0865c
PF3D7_1371500		probable protein, unknown function	No	0.816407	-1.5812	-0.764795	-1.65317	-1.50924	-0.84322	-0.686371	PF3D7_1371500	43	T	___1	NIAVNLIPLQT(0.976)LT(0.024)K	11	NKYSKNIAVNLIPLQTLTKMYKYNSQNEDII	MAL13P1.461
PF3D7_1149000	Pf332	antigen 332, DBL-like protein	Yes	0.815382	-2.57091	-1.75553	-2.6119	-2.52992	-1.84943	-1.66163	PF3D7_1149000	1065	S	___1	ELPVKEESVFEELT(0.001)EEDQS(0.969)VT(0.03)K	19	VKEESVFEELTEEDQSVTKEIPVEEHSVFKE	PF11_0506;PF11_0507
PF3D7_1478600	PTP3	EMP1-trafficking protein	Yes	0.810382	-0.316916	0.493465	-0.397429	-0.236404	0.537201	0.44973	PF3D7_1478600	402	S	___1	NPFIDNDLS(0.001)DKKS(0.999)NMQDNNK	13	EGKNPFIDNDLSDKKSNMQDNNKGLKVTTNK	PF14_0758
PF3D7_1007700	AP2-I	AP2 domain transcription factor, putative	No	0.808872	1.12232	1.93119	1.31487	0.929766	1.95537	1.90701	PF3D7_1007700	735	S	___1	KLS(1)EES(1)QMLLDDMEQTLCR	3	KGVKRGRGRPPKRKLSEESQMLLDDMEQTLC	PF10_0075
PF3D7_1353100		Plasmodium exported protein, unknown function	Yes	0.807287	5.08519	5.89248	5.06115	5.10924	5.78938	5.99558	PF3D7_1353100	273	S	___1	RYGS(0.989)GS(0.011)HDHEEEVVEA	4	DNKSKKKPKDNKRYGSGSHDHEEEVVEA___	PF13_0275
PF3D7_1036900		conserved Plasmodium protein, unknown function	No	0.806263	2.12335	2.92961	2.15904	2.08765	2.91845	2.94077	PF3D7_1036900	539	T	___2	LNYDMT(0.098)T(0.902)IT(1)EETNEFDHDVNKK	7	EYDPYTGQKLNYDMTTITEETNEFDHDVNKK	PF10_0361
PF3D7_0202000	KAHRP	erythrocyte membrane protein 1, PfEMP1	Yes	0.805403	9.21176	10.0172	9.17218	9.25134	10.1711	9.86327	PF3D7_0202000;PF3D7_1255200	549;1773	T	___1	GAT(1)KEAS(0.055)T(0.891)S(0.055)K	8	CAAEGATKGATKEASTSKEATKEASTSKEAT	PF02_0020;PFB0100c
PF3D7_0202000	KAHRP	knob-associated histidine-rich protein	Yes	0.804812	-0.277512	0.527301	-0.377789	-0.177235	0.300421	0.754181	PF3D7_0202000	343	Y	___1	Y(0.953)S(0.609)S(0.422)FS(0.013)S(0.002)VNKYGK	1	SAPYGVPHGAAHGSRYSSFSSVNKYGKHGDE	PF02_0020;PFB0100c
PF3D7_1307800		fork head domain protein, putative	No	0.804273	1.60709	2.41136	1.8402	1.37398	2.5125	2.31022	PF3D7_1307800	296	S	___1	ILVDKYS(0.906)S(0.094)DVENDK	7	ARKKSKSSKILVDKYSSDVENDKKGVEEKYK	PF13_0042
PF3D7_0113200		Plasmodium exported protein, unknown function	Yes	0.802612	2.08376	2.88638	2.13333	2.03419	2.8707	2.90205	PF3D7_0113200	299	S	___1	QDS(1)QTNHYGR	3	ENKNKNKIINYPRQDSQTNHYGRYTSRTNNQ	MAL1P3.08;PFA0630c
PF3D7_1442900	ARFGEF	protein transport protein SEC7, putative	No	0.801547	-0.193597	0.60795	-0.495529	0.108335	0.67882	0.537081	PF3D7_1442900	1118	S	___1	NS(0.109)S(0.891)NIHK	3	EKISANDQKKNNKNSSNIHKNISDDHSVLNN	PF14_0407
PF3D7_0610900	SPT5	transcription elongation factor SPT5, putative	No	0.800222	1.14161	1.94184	1.29845	0.984776	2.0003	1.88337	PF3D7_0610900	1121	S	___1	DS(0.5)S(0.5)NNIKHEEHK	3	DYLKKKHSINNFRDSSNNIKHEEHKNYVTHI	2270.t00205;MAL6P1.111;PFF0535c
PF3D7_0315100	eIF4E	eukaryotic translation initiation factor 4E	No	0.800183	-1.58414	-0.783955	-1.56377	-1.60451	-0.83149	-0.73642	PF3D7_0315100	223	S	___1	SLS(1)HIHR	3	RIDGSTIFPPRVKSLSHIHR___________	MAL3P5.13;PFC0635c
PF3D7_1107300	PAIP1	polyadenylate-binding protein-interacting protein 1, putative	No	0.797687	1.99918	2.79687	1.9583	2.04007	2.79177	2.80197	PF3D7_1107300	1449	S	___1	RNS(1)NFINEK	3	GSNNEKNQNVEDRRNSNFINEKINTQDNKTS	PF11_0086
PF3D7_0500800	MESA	mature parasite-infected erythrocyte surface antigen	Yes	0.795403	-3.43324	-2.63783	-3.45993	-3.40654	-2.76445	-2.51122	PF3D7_0500800	354	T	___3	VS(0.002)GPY(0.006)ENS(0.64)ENS(0.713)NVT(0.713)S(0.704)ES(0.175)EET(0.047)KK	14	NKVSGPYENSENSNVTSESEETKKLAEKEEN	MAL5P1.9;PFE0040c
PF3D7_0202000	KAHRP	knob-associated histidine-rich protein	Yes	0.794913	-2.92713	-2.13221	-2.85949	-2.99477	-2.06656	-2.19787	PF3D7_0202000	599	T	___1	GAS(0.967)T(0.972)T(0.06)AGS(0.974)T(0.021)T(0.004)GATTGANAVQSK	4	TKEASTTEGATKGASTTAGSTTGATTGANAV	PF02_0020;PFB0100c
PF3D7_0831000	GEXP09	Plasmodium exported protein (PHISTb), unknown function	Yes	0.792268	-1.13758	-0.345314	-1.08961	-1.18555	-0.349369	-0.341259	PF3D7_0831000	125	S	___1	S(0.014)LNGEY(0.022)S(0.941)DNPLFDY(0.023)K	7	NKWYEENKRSLNGEYSDNPLFDYKLFKYHDI	MAL8P1.2
PF3D7_1149000	Pf332	antigen 332, DBL-like protein	Yes	0.789513	-1.4072	-0.61769	-1.27104	-1.54337	-0.67697	-0.558411	PF3D7_1149000	4734	S	___1	QGS(0.953)VT(0.047)EEIVEEEELDTEEVLEDK	3	EEDKSVIEEAVEKQGSVTEEIVEEEELDTEE	PF11_0506;PF11_0507
PF3D7_0730900	PTP4	EMP1-trafficking protein	Yes	0.788078	0.655592	1.44367	0.75659	0.554594	1.29432	1.59302	PF3D7_0730900	978	S	___1	NNDDVS(1)LNKESYPR	6	VPRLSVSEFKNNDDVSLNKESYPRRKFVSEL	MAL7P1.171
PF3D7_0401800	PfD80	Plasmodium exported protein (PHISTb), unknown function	Yes	0.787813	3.46446	4.25227	3.47238	3.45654	4.18195	4.32259	PF3D7_0401800	288	S	___1	FPS(0.996)T(0.204)GS(0.785)S(0.015)RLEDYEK	3	STTRLPSTGSTIRFPSTGSSRLEDYEKEGSN	MAL4P1.16;PFD0080c
PF3D7_1206700	EIF5	eukaryotic translation initiation factor 5, putative	No	0.787051	0.0838337	0.870885	0.289412	-0.121744	1.01432	0.727449	PF3D7_1206700	204	S	___3	NGVIY(0.607)S(0.395)DDEENDDS(0.998)DDLLDS(0.996)DKS(0.869)IS(0.134)NGKK	23	DEENDDSDDLLDSDKSISNGKKENKKNKKKD	2277.t00068;MAL12P1.67;PFL0335c
PF3D7_1206700	EIF5	eukaryotic translation initiation factor 5, putative	No	0.787051	0.0838337	0.870885	0.289412	-0.121744	1.01432	0.727449	PF3D7_1206700	186	Y	___3	NGVIY(0.607)S(0.395)DDEENDDS(0.998)DDLLDS(0.996)DKS(0.869)IS(0.134)NGKK	5	EKTDKNEDNNRNGVIYSDDEENDDSDDLLDS	2277.t00068;MAL12P1.67;PFL0335c
PF3D7_0209800	UAP56	ATP-dependent RNA helicase UAP56	No	0.786497	0.742423	1.52892	0.746801	0.738045	1.48508	1.57276	PF3D7_0209800	240	S	___1	LDMRS(1)DVQK	5	VLDECDKCLEKLDMRSDVQKIFISTPLKKQV	PF02_0093;PFB0445c
PF3D7_0113200		Plasmodium exported protein, unknown function	Yes	0.785788	1.61004	2.39583	1.63908	1.58101	2.40115	2.39051	PF3D7_0113200	339	S	___2	QDS(0.988)QT(0.01)S(0.002)YYGR	3	YSRYTSRSNNPPRQDSQTSYYGRYTSRTNNQ	MAL1P3.08;PFA0630c
PF3D7_0702500		Plasmodium exported protein, unknown function	Yes	0.785742	4.79168	5.57742	4.90647	4.67689	5.60424	5.5506	PF3D7_0702500	224	S	___1	SFS(0.998)GS(0.002)K	3	HYSLGGQPSSSGRSFSGSKYNTSNLASSSTT	PF07_0008
PF3D7_1302100	G27/25	gamete antigen 27/25	No	0.783288	0.187452	0.97074	0.0706806	0.304224	0.928991	1.01249	PF3D7_1302100	8	S	___1	VQKDS(1)AKPLDK	5	________MSKVQKDSAKPLDKFGNIYDYHY	PF13_0011
PF3D7_1149000	Pf332	antigen 332, DBL-like protein	Yes	0.783273	-1.17846	-0.395185	-1.09512	-1.2618	-0.436909	-0.35346	PF3D7_1149000	757	S	___1	S(0.999)VS(0.001)EEIPVEEK	1	FKGQLINEEKPVEEKSVSEEIPVEEKSVSEE	PF11_0506;PF11_0507
PF3D7_0401800	PfD80	Plasmodium exported protein (PHISTb), unknown function	Yes	0.781117	-0.367072	0.414045	-0.213839	-0.520306	0.185511	0.64258	PF3D7_0401800	180	S	___2	SAS(0.002)T(0.002)AS(0.994)T(0.901)AS(0.101)AAS(1)AASTTR	12	STARSASTASTASAASAASTTRSASAASTTR	MAL4P1.16;PFD0080c
PF3D7_0401800	PfD80	Plasmodium exported protein (PHISTb), unknown function	Yes	0.779542	0.821223	1.60077	0.831121	0.811325	1.55147	1.65006	PF3D7_0401800	80	S	___1	SPST(0.001)AS(0.02)T(0.108)S(0.833)T(0.038)SLR	8	SLASTTKRSPSTASTSTSLRSASTASTASTL	MAL4P1.16;PFD0080c
PF3D7_1036900		conserved Plasmodium protein, unknown function	No	0.778978	-1.12126	-0.342279	-1.07279	-1.16973	-0.408939	-0.27562	PF3D7_1036900	538	T	___2	LNY(0.011)DMT(0.783)T(0.735)IT(0.735)EET(0.735)NEFDHDVNK	6	LEYDPYTGQKLNYDMTTITEETNEFDHDVNK	PF10_0361
PF3D7_1353100		Plasmodium exported protein, unknown function	Yes	0.777099	1.06861	1.84571	1.19298	0.944244	1.77315	1.91827	PF3D7_1353100	121	S	___1	S(0.872)S(0.458)S(0.394)NS(0.276)HVESNTFQNK	1	HTGERTSYTEVKHRRSSSNSHVESNTFQNKE	PF13_0275
PF3D7_0401800	PfD80	Plasmodium exported protein (PHISTb), unknown function	Yes	0.775188	2.23037	3.00556	2.19539	2.26535	2.92369	3.08743	PF3D7_0401800	288	S	___3	FPS(0.996)T(0.204)GS(0.785)S(0.015)RLEDYEK	3	STTRLPSTGSTIRFPSTGSSRLEDYEKEGSN	MAL4P1.16;PFD0080c
PF3D7_0220600		Plasmodium exported protein (hyp9), unknown function	Yes	0.775152	1.84993	2.62508	1.87523	1.82463	2.54298	2.70719	PF3D7_0220600	99	S	___1	MVEVDSES(1)VCPGTNEVNLK	8	GNMHPEIKMVEVDSESVCPGTNEVNLKVVTN	PF02_0193;PFB0930w
PF3D7_1466800		conserved Plasmodium protein, unknown function	No	0.774627	2.14694	2.92157	2.10724	2.18665	2.89835	2.94479	PF3D7_1466800	203	S	___1	NQES(1)HDEYNEEAVKK	4	HEDENVKYMNEKNQESHDEYNEEAVKKNFRY	PF14_0636
PF3D7_0318200	RPB1	DNA-directed RNA polymerase II subunit RPB1	No	0.774472	2.398	3.17247	2.54661	2.24939	3.19366	3.15128	PF3D7_0318200	2161	S	___2	LGGKFS(0.999)PT(0.01)QS(0.991)PK	6	KDINNLDTLKLGGKFSPTQSPKSPTSVMHSP	MAL3P6.20;PFC0805w
PF3D7_0419900		phosphatidylinositol 4-kinase, putative	No	0.773842	-1.48272	-0.708879	-1.44902	-1.51642	-0.569429	-0.84833	PF3D7_0419900	1797	S	___3	ENILY(1)S(1)LY(1)LLIDK	6	IYYIEGLRKKENILYSLYLLIDKNVYRDKYL	MAL4P1.188;PFD0965w
PF3D7_0419900		phosphatidylinositol 4-kinase, putative	No	0.773842	-1.48272	-0.708879	-1.44902	-1.51642	-0.569429	-0.84833	PF3D7_0419900	1796	Y	___3	ENILY(1)S(1)LY(1)LLIDK	5	IIYYIEGLRKKENILYSLYLLIDKNVYRDKY	MAL4P1.188;PFD0965w
PF3D7_0419900		phosphatidylinositol 4-kinase, putative	No	0.773842	-1.48272	-0.708879	-1.44902	-1.51642	-0.569429	-0.84833	PF3D7_0419900	1799	Y	___3	ENILY(1)S(1)LY(1)LLIDK	8	YIEGLRKKENILYSLYLLIDKNVYRDKYLHK	MAL4P1.188;PFD0965w
PF3D7_0601900		conserved Plasmodium protein, unknown function	Yes	0.772449	2.31833	3.09078	2.33936	2.2973	2.78336	3.3982	PF3D7_0601900	118	S	___1	SHS(0.003)S(0.006)S(0.037)S(0.917)S(0.037)VYASANAEN	6	TSSSSRQAARSHSSSSSVYASANAEN_____	2270.t00296;MAL6P1.22;PFF0090w
PF3D7_1149100.2-p1		Plasmodium exported protein, unknown function		0.772053	-0.999542	-0.227489	-0.8759	-1.12318	-0.32724	-0.127739	PF3D7_1149100.2-p1;PF3D7_1149100	186;187	T	___1	TETQEESLNKEVVEGCS(0.5)T(0.5)GMCPLK	18	TQEESLNKEVVEGCSTGMCPLKNNDTKKENC
PF3D7_0501400	FIRA	interspersed repeat antigen	Yes	0.771558	3.53686	4.30842	3.69145	3.38227	4.26673	4.3501	PF3D7_0501400	1333	S	___1	KAS(1)LGSVK	3	SWLSFGRKDKKDKKASLGSVKETYEKETQTE	MAL5P1.15;PFE0070w
PF3D7_0520000	RPS9	40S ribosomal protein S9, putative	No	0.771258	-3.3685	-2.59724	-3.24026	-3.49675	-2.72262	-2.47187	PF3D7_0520000	67	S	___1	YLLT(0.001)LDEKS(0.378)S(0.621)KR	10	IRSAARYLLTLDEKSSKRIFQGEALLRRMVR	MAL5P1.201;PFE1005w
PF3D7_0532300		Plasmodium exported protein (PHISTb), unknown function	Yes	0.770278	3.57255	4.34283	3.63356	3.51154	4.24335	4.4423	PF3D7_0532300	347	Y	___1	NYSTHENT(0.001)Y(0.999)PTLK	9	KNGKFLKNYSTHENTYPTLKTLLEKYAITDD	MAL5P1.314;PFE1600w
PF3D7_0102200	RESA	ring-infected erythrocyte surface antigen	Yes	0.770277	2.65322	3.4235	2.69723	2.60921	3.2933	3.55369	PF3D7_0102200	382	S	___1	AS(0.998)IT(0.002)NSAINYYDTVK	2	QQVNEYGDILPSLRASITNSAINYYDTVKDG	MAL1P1.13;PFA0110w
PF3D7_1120100	PGM1	phosphoglycerate mutase, putative	No	0.765841	1.9467	2.71254	2.00347	1.88993	2.86422	2.56086	PF3D7_1120100	94	S	___1	HYGS(1)LQGLNK	4	VPVVKTWRLNERHYGSLQGLNKSETAKKYGE	PF11_0208
PF3D7_1330800		RNA-binding protein, putative	No	0.761662	2.68048	3.44214	2.73569	2.62527	3.50137	3.38291	PF3D7_1330800	26	S	___1	ADDS(1)NVDNK	4	SKDKKEELKDIKADDSNVDNKATESTAVDSE	PF13_0165
PF3D7_0301700		Plasmodium exported protein, unknown function	Yes	0.761373	3.69347	4.45484	3.79148	3.59546	4.4203	4.48938	PF3D7_0301700	152	S	___1	VTVLEPQTENS(1)EDEENYEK	11	NSTPRVTVLEPQTENSEDEENYEKTIVDELN	MAL3P8.15;PFC0085c
PF3D7_1464600	UIS2	serine/threonine protein phosphatase UIS2, putative	No	0.759647	-3.21997	-2.46032	-3.16402	-3.27592	-2.42383	-2.49681	PF3D7_1464600	633	T	___1	DLGT(0.011)NT(0.989)LSAESIANFYNDK	6	KKKSEKQVHKDLGTNTLSAESIANFYNDKIK	PF14_0614
PF3D7_0611400	SWIB	SWIB/MDM2 domain-containing protein	No	0.758012	-1.93259	-1.17458	-1.83052	-2.03466	-1.17338	-1.17578	PF3D7_0611400	455	S	___2	ENLDNNS(0.994)EDIS(0.987)LS(0.019)NIK	7	ETEKDIMQKENLDNNSEDISLSNIKESNNLT	2270.t00200;MAL6P1.116;PFF0560c
PF3D7_0611400	SWIB	SWIB/MDM2 domain-containing protein	No	0.758012	-1.93259	-1.17458	-1.83052	-2.03466	-1.17338	-1.17578	PF3D7_0611400	459	S	___2	ENLDNNS(0.994)EDIS(0.987)LS(0.019)NIK	11	DIMQKENLDNNSEDISLSNIKESNNLTDVEN	2270.t00200;MAL6P1.116;PFF0560c
PF3D7_0401800	PfD80	Plasmodium exported protein (PHISTb), unknown function	Yes	0.757812	-0.340022	0.41779	-0.32391	-0.356134	0.281401	0.55418	PF3D7_0401800	327	S	___1	EAESVDDNNKEGNES(0.999)DNIY(0.001)CMLCSSNTR	15	KEAESVDDNNKEGNESDNIYCMLCSSNTRGF	MAL4P1.16;PFD0080c
PF3D7_1466900		rhoptry protein, putative	No	0.757283	-1.38481	-0.627524	-1.33589	-1.43373	-0.678829	-0.57622	PF3D7_1466900	246	S	___2	S(0.509)S(0.509)Y(0.474)S(0.509)EVNDEFNINNEEHHNK	1	DEQNNENVPMCLISKSSYSEVNDEFNINNEE	PF14_0637
PF3D7_1466900		rhoptry protein, putative	No	0.757283	-1.38481	-0.627524	-1.33589	-1.43373	-0.678829	-0.57622	PF3D7_1466900	247	S	___2	S(0.509)S(0.509)Y(0.474)S(0.509)EVNDEFNINNEEHHNK	2	EQNNENVPMCLISKSSYSEVNDEFNINNEEH	PF14_0637
PF3D7_1466900		rhoptry protein, putative	No	0.757283	-1.38481	-0.627524	-1.33589	-1.43373	-0.678829	-0.57622	PF3D7_1466900	249	S	___2	S(0.002)S(0.002)YS(0.996)EVNDEFNINNEEHHNK	4	NNENVPMCLISKSSYSEVNDEFNINNEEHHN	PF14_0637
PF3D7_0501400	FIRA	interspersed repeat antigen	Yes	0.757233	-2.35808	-1.60084	-2.36706	-2.34909	-1.77387	-1.42782	PF3D7_0501400	1190	S	___2	AS(0.002)EGDNHS(0.997)LS(0.001)SLSEETEEK	8	QEHDDEKKASEGDNHSLSSLSEETEEKSHTK	MAL5P1.15;PFE0070w
PF3D7_1001000	PfJ13	Plasmodium exported protein (hyp12), unknown function	Yes	0.753774	1.75632	2.5101	1.90325	1.60939	2.37931	2.64088	PF3D7_1001000	87	S	___1	S(0.976)LKGT(0.024)ELDVTSYNK	1	NNKNEDNHELQSKSRSLKGTELDVTSYNKSK	PF10_0013
PF3D7_0922100		ubiquitin-like protein, putative	No	0.753258	-1.93628	-1.18302	-1.9755	-1.89705	-1.1742	-1.19184	PF3D7_0922100	791	S	___1	RNS(1)AIR	3	ANMRSIQMTSNNRRNSAIRRSHMKCLNDVND	PFI1085w
PF3D7_0303100		conserved Plasmodium protein, unknown function	No	0.753193	1.41537	2.16856	1.48893	1.3418	2.21188	2.12524	PF3D7_0303100	400	S	___1	TLNNYYLLNDVET(0.015)KS(0.985)DTYINETISK	15	KTLNNYYLLNDVETKSDTYINETISKDVNYH	MAL3P1.11;PFC0145c
PF3D7_0318200	RPB1	DNA-directed RNA polymerase II subunit RPB1	No	0.751416	2.50324	3.25466	2.65062	2.35587	3.27397	3.23535	PF3D7_0318200	2165	S	___2	LGGKFS(0.999)PT(0.01)QS(0.991)PK	10	NLDTLKLGGKFSPTQSPKSPTSVMHSPFSPF	MAL3P6.20;PFC0805w
PF3D7_1478600	PTP3	EMP1-trafficking protein	Yes	0.749023	-0.809143	-0.0601196	-0.88257	-0.735716	-0.15045	0.0302105	PF3D7_1478600;PF3D7_1477000	1008;753	S	___1	LFTSDIMNNY(0.001)GNIKS(0.999)GLK	15	KLFTSDIMNNYGNIKSGLKHNTNKIAKTVLK	PF14_0758
PF3D7_1203700	NAPL	nucleosome assembly protein	No	0.748497	0.0369377	0.785435	0.10252	-0.0286446	0.60758	0.963289	PF3D7_1203700	33	T	___1	IDDDKMT(0.999)DLT(0.001)EEQKETLK	7	ISSLLESIKIDDDKMTDLTEEQKETLKKLKL	2277.t00037;MAL12P1.37;PFL0185c
PF3D7_1133700		FHA domain-containing protein, putative	No	0.747098	-3.28765	-2.54055	-3.20511	-3.3702	-2.54883	-2.53228	PF3D7_1133700	542	S	___2	DT(0.012)NNS(0.985)IES(0.992)IILT(0.01)K	5	AERYDTELTTKDTNNSIESIILTKGKGADKR	PF11_0347
PF3D7_1133700		FHA domain-containing protein, putative	No	0.747098	-3.28765	-2.54055	-3.20511	-3.3702	-2.54883	-2.53228	PF3D7_1133700	545	S	___2	DT(0.012)NNS(0.985)IES(0.992)IILT(0.01)K	8	YDTELTTKDTNNSIESIILTKGKGADKRSKY	PF11_0347
PF3D7_0424500	FIKK4.1	serine/threonine protein kinase, FIKK family	Yes	0.746737	2.74809	3.49483	2.78897	2.7072	3.49843	3.49122	PF3D7_0424500	525	T	___1	INDPYDYLKS(0.5)IT(0.5)NQEER	12	EKLKINDPYDYLKSITNQEERKSFYFNVSNA	MAL4P1.228;PFD1165w
PF3D7_1001500	ETRAMP10	early transcribed membrane protein 10.1	Yes	0.746627	0.0649586	0.811585	0.198751	-0.0688343	0.891531	0.73164	PF3D7_1001500	100	T	___2	NKS(0.948)QEGS(0.185)T(0.84)PLLT(0.027)AKA	8	KKGSNDSKNKSQEGSTPLLTAKA________	PF10_0019
PF3D7_1362700		conserved Plasmodium protein, unknown function	No	0.745613	1.9266	2.67221	2.00539	1.84781	2.59792	2.7465	PF3D7_1362700	1816	S	___1	EYDKT(0.5)S(0.5)DCDKNNTPLK	6	TQIKNEFNSKEYDKTSDCDKNNTPLKNGCNQ	MAL13P1.313;PF13_0332
PF3D7_1362700		conserved Plasmodium protein, unknown function	No	0.745613	1.9266	2.67221	2.00539	1.84781	2.59792	2.7465	PF3D7_1362700	1815	T	___1	EYDKT(0.5)S(0.5)DCDKNNTPLK	5	TTQIKNEFNSKEYDKTSDCDKNNTPLKNGCN	MAL13P1.313;PF13_0332
PF3D7_1002400.2-p1		RNA-binding protein, putative		0.744222	0.269458	1.01368	0.323421	0.215494	0.94887	1.07849	PF3D7_1002400.2-p1;PF3D7_1002400	71;71	S	___1	NFGFVTFNNS(1)EDAENAMNK	10	ITKESRNFGFVTFNNSEDAENAMNKANKMEI
PF3D7_0610900	SPT5	transcription elongation factor SPT5, putative	No	0.744198	1.45598	2.20018	1.60979	1.30216	2.26141	2.13894	PF3D7_0610900	1120	S	___1	DS(0.814)S(0.186)NNIKHEEHK	2	DDYLKKKHSINNFRDSSNNIKHEEHKNYVTH	2270.t00205;MAL6P1.111;PFF0535c
PF3D7_0215300	ACS8	acyl-CoA synthetase	Yes	0.744108	-0.164997	0.579111	-0.10397	-0.226025	0.511171	0.647051	PF3D7_0215300	859	S	___1	NT(0.396)LKS(0.602)T(0.007)DAS(0.995)LKIPEK	9	MSNITLKNTLKSTDASLKIPEKNKVQTNKSR	PF02_0144;PFB0695c
PF3D7_0702500		Plasmodium exported protein, unknown function	Yes	0.742012	-1.31962	-0.577605	-1.43257	-1.20667	-0.69779	-0.45742	PF3D7_0702500	224	S	___2	SFS(0.998)GS(0.002)K	3	HYSLGGQPSSSGRSFSGSKYNTSNLASSSTT	PF07_0008
PF3D7_0824400	NT2	nucleoside transporter 2	No	0.741858	-0.971787	-0.229929	-0.70664	-1.23693	0.0173512	-0.477209	PF3D7_0824400	292	S	___1	S(0.964)QNIS(0.036)YPININSIIYESK	1	RDDSYKYYESITEKKSQNISYPININSIIYE	MAL8P1.32
PF3D7_1206700	EIF5	eukaryotic translation initiation factor 5, putative	No	0.738169	0.179762	0.917931	0.36809	-0.0085659	1.05704	0.77882	PF3D7_1206700	195	S	___3	NGVIY(0.014)S(0.986)DDEENDDS(1)DDLLDSDKSISNGK	14	NRNGVIYSDDEENDDSDDLLDSDKSISNGKK	2277.t00068;MAL12P1.67;PFL0335c
PF3D7_1206700	EIF5	eukaryotic translation initiation factor 5, putative	No	0.738169	0.179762	0.917931	0.36809	-0.0085659	1.05704	0.77882	PF3D7_1206700	201	S	___3	NGVIY(0.607)S(0.395)DDEENDDS(0.998)DDLLDS(0.996)DKS(0.869)IS(0.134)NGKK	20	YSDDEENDDSDDLLDSDKSISNGKKENKKNK	2277.t00068;MAL12P1.67;PFL0335c
PF3D7_1365800		conserved Plasmodium protein, unknown function	No	0.737759	-0.858148	-0.120389	-0.671249	-1.04505	-0.0353489	-0.205429	PF3D7_1365800	13	S	___1	KS(0.551)S(0.445)ES(0.004)LKEDDEFFLER	2	___MKAFVNKIQFRKSSESLKEDDEFFLERK	MAL13P1.330
PF3D7_0702500		Plasmodium exported protein, unknown function	Yes	0.737412	2.67609	3.4135	2.71386	2.63832	3.35039	3.47661	PF3D7_0702500	191	S	___1	NYS(1)LGNLSTGTTSQGSTSSR	3	KKEHSTHDLPAGRNYSLGNLSTGTTSQGSTS	PF07_0008
PF3D7_0601900		conserved Plasmodium protein, unknown function	Yes	0.736712	-0.0606527	0.67606	-0.0354099	-0.0858955	0.42453	0.927589	PF3D7_0601900	118	S	___2	SHS(0.003)S(0.006)S(0.037)S(0.917)S(0.037)VYASANAEN	6	TSSSSRQAARSHSSSSSVYASANAEN_____	2270.t00296;MAL6P1.22;PFF0090w
PF3D7_1343300		conserved Plasmodium protein, unknown function	No	0.736153	-1.5263	-0.790145	-1.37369	-1.67891	-1.01692	-0.56337	PF3D7_1343300	439	S	___1	SDPCDLDS(1)IDYEVNPVLK	8	KVNSSSEKSDPCDLDSIDYEVNPVLKTDIKK	PF13_0237
PF3D7_1445700		conserved Plasmodium protein, unknown function	No	0.735158	-0.487368	0.24779	-0.587749	-0.386986	0.477711	0.0178699	PF3D7_1445700	306	S	___1	SYRS(1)FKK	4	GGRVDRLPGFRRSYRSFKKVDEGNWNNKYEK	PF14_0434
PF3D7_0401800	PfD80	Plasmodium exported protein (PHISTb), unknown function	Yes	0.733686	3.32559	4.05928	3.3865	3.26468	3.90774	4.21082	PF3D7_0401800	64	S	___1	S(0.288)S(0.341)S(0.407)CS(0.97)S(0.958)LAS(0.028)T(0.006)T(0.001)K	5	SEEKAEDDYKKSSSCSSLASTTKRSPSTAST	MAL4P1.16;PFD0080c
PF3D7_0702500		Plasmodium exported protein, unknown function	Yes	0.733238	-0.168347	0.564891	-0.169079	-0.167616	0.420671	0.70911	PF3D7_0702500	151	S	___2	NNSDGST(0.001)ENHLS(0.972)GS(0.011)NS(0.016)DGR	12	QLYKNNSDGSTENHLSGSNSDGRNSSQHSVG	PF07_0008
PF3D7_0702500		Plasmodium exported protein, unknown function	Yes	0.733238	-0.168347	0.564891	-0.169079	-0.167616	0.420671	0.70911	PF3D7_0702500	153	S	___2	NNSDGSTENHLS(0.971)GS(0.597)NS(0.432)DGR	14	YKNNSDGSTENHLSGSNSDGRNSSQHSVGSH	PF07_0008
PF3D7_0401800	PfD80	Plasmodium exported protein (PHISTb), unknown function	Yes	0.732422	2.85962	3.59204	2.9679	2.75134	3.50645	3.67763	PF3D7_0401800	279	S	___1	LPS(0.993)T(0.015)GS(0.971)T(0.02)IR	3	SPSTGSTSGSTTRLPSTGSTIRFPSTGSSRL	MAL4P1.16;PFD0080c
PF3D7_1358800	RPS15	40S ribosomal protein S15	No	0.731586	0.614768	1.34635	0.58724	0.642296	1.25301	1.4397	PF3D7_1358800	31	S	___1	QKPS(1)EIEDAIIK	4	LPYKRKQPSWLKQKPSEIEDAIIKLAKKGQT	PF13_0316
PF3D7_0923900	PABP2	RNA-binding protein, putative	No	0.730273	1.6745	2.40477	1.67299	1.676	2.27711	2.53243	PF3D7_0923900	36	S	___1	VQVDDINNIDKEFS(1)DLQK	14	FKVQVDDINNIDKEFSDLQKLKMMNEGAEIQ	PFI1175c
PF3D7_1110900		ES2 protein, putative	No	0.730112	0.104463	0.834575	0.170511	0.038414	0.79616	0.87299	PF3D7_1110900	239	Y	___1	YFEEDENYSLVNY(1)VHSDQEYIK	13	LLKYFEEDENYSLVNYVHSDQEYIKEKKKKK	PF11_0115
PF3D7_0113200		Plasmodium exported protein, unknown function	Yes	0.728152	0.028923	0.757075	0.115831	-0.0579853	0.838781	0.675369	PF3D7_0113200	188	S	___1	NQS(1)IS(0.531)S(0.469)NNNNNNNKEEEEECTK	3	KKDKRNISISNKRNQSISSNNNNNNNKEEEE	MAL1P3.08;PFA0630c
PF3D7_0702500		Plasmodium exported protein, unknown function	Yes	0.726643	2.40775	3.1344	2.48783	2.32767	3.0017	3.26709	PF3D7_0702500	155	S	___1	NNSDGSTENHLSGS(0.004)NS(0.995)DGR	16	NNSDGSTENHLSGSNSDGRNSSQHSVGSHSV	PF07_0008
PF3D7_1123400	ERF3	translation elongation factor EF-1, subunit alpha, putative	No	0.724442	1.22115	1.94559	1.39843	1.04387	1.86702	2.02416	PF3D7_1123400	66	S	___1	IKEEEDINGS(1)EIVEDENVNDIEEK	10	NNDLDKIKEEEDINGSEIVEDENVNDIEEKI	PF11_0245
PF3D7_0220300		Plasmodium exported protein, unknown function	Yes	0.724242	1.53094	2.25518	1.55411	1.50776	2.14475	2.36561	PF3D7_0220300	90	T	___1	Y(0.001)S(0.009)T(0.989)APYELIK	3	ASTTKTRRFIHDRYSTAPYELIKRKPKKKKS	PF02_0190;PFB0923c
PF3D7_0935900	REX1	ring-exported protein 1	Yes	0.723457	-0.0536118	0.669846	-0.172989	0.0657654	0.602821	0.73687	PF3D7_0935900	593	S	___1	KESEAPKGS(0.095)S(0.867)T(0.019)S(0.019)DK	10	KDALAKKESEAPKGSSTSDKNTTENQLNAEA	PFI1735c
PF3D7_0812500		RNA-binding protein, putative	No	0.722793	1.37902	2.10181	1.46103	1.297	2.19519	2.00843	PF3D7_0812500	727	S	___1	YS(1)NYNTYNNNDNYNNK	2	KHDLYDKEYYNKRKYSNYNTYNNNDNYNNKD	PF08_0086
PF3D7_0113000	GARP	glutamic acid-rich protein	Yes	0.722718	-2.7407	-2.01798	-2.66801	-2.8134	-2.22784	-1.80813	PF3D7_0113000	226	S	___1	EQGGCGIIS(0.57)S(0.43)VHETSNDTK	9	SSPYQYREQGGCGIISSVHETSNDTKDNDKE	MAL1P3.06;PFA0620c
PF3D7_1478600	PTP3	EMP1-trafficking protein	Yes	0.722223	-0.938723	-0.216499	-0.94673	-0.930716	-0.27636	-0.156639	PF3D7_1478600;PF3D7_1477000	1171;922	S	___2	CGIDVES(1)DIDIETETNPLK	7	KVKDIVSKKCGIDVESDIDIETETNPLKWHQ	PF14_0758
PF3D7_1478600	PTP3	EMP1-trafficking protein	Yes	0.722223	-0.938723	-0.216499	-0.94673	-0.930716	-0.27636	-0.156639	PF3D7_1478600;PF3D7_1477000	1177;928	T	___2	KCGIDVES(1)DIDIET(0.998)ET(0.002)NPLK	14	SKKCGIDVESDIDIETETNPLKWHQVVRNKY	PF14_0758
PF3D7_1338300	EF-1gamma	elongation factor 1-gamma, putative	No	0.720907	-0.0556221	0.665285	-0.0585785	-0.0526657	0.59968	0.73089	PF3D7_1338300	252	T	___1	KT(1)NPLDLLPPSNFSLDEWK	2	DLLSDDLAEKKQPKKTNPLDLLPPSNFSLDE	PF13_0214
PF3D7_1307800		fork head domain protein, putative	No	0.720473	-2.21834	-1.49787	-1.95315	-2.48354	-1.36563	-1.63011	PF3D7_1307800	242	S	___3	S(0.92)S(0.088)EHT(0.409)RT(0.304)S(0.262)KDNS(0.012)Y(0.002)YDSK	1	DKYDKQMDKIYILKKSSEHTRTSKDNSYYDS	PF13_0042
PF3D7_0914900		BSD-domain protein, putative	No	0.720304	-2.29831	-1.578	-2.16425	-2.43237	-1.57801	-1.578	PF3D7_0914900	556	S	___3	FLDEIS(1)EANRS(1)ACDLEEPK	6	FQKISEYNTKFLDEISEANRSACDLEEPKSD	PFI0730w
PF3D7_0914900		BSD-domain protein, putative	No	0.720304	-2.29831	-1.578	-2.16425	-2.43237	-1.57801	-1.578	PF3D7_0914900	561	S	___3	FLDEIS(1)EANRS(1)ACDLEEPK	11	EYNTKFLDEISEANRSACDLEEPKSDFFDSS	PFI0730w
PF3D7_0914900		BSD-domain protein, putative	No	0.720304	-2.29831	-1.578	-2.16425	-2.43237	-1.57801	-1.578	PF3D7_0914900	570	S	___3	SACDLEEPKS(1)DFFDSSNIK	10	ISEANRSACDLEEPKSDFFDSSNIKKELNEM	PFI0730w
PF3D7_1429600	GEXP03	conserved Plasmodium protein, unknown function	Yes	0.719413	0.129212	0.848625	0.17256	0.085865	0.94648	0.750771	PF3D7_1429600	190	S	___2	S(1)AAS(1)EECVHFK	1	KNYNDMSTNNDGTPRSAASEECVHFKEKSYL	PF14_0275
PF3D7_1429600	GEXP03	conserved Plasmodium protein, unknown function	Yes	0.719413	0.129212	0.848625	0.17256	0.085865	0.94648	0.750771	PF3D7_1429600	193	S	___2	S(1)AAS(1)EECVHFK	4	NDMSTNNDGTPRSAASEECVHFKEKSYLLDK	PF14_0275
PF3D7_1033200	ETRAMP10.2	early transcribed membrane protein 10.2	Yes	0.718922	1.34176	2.06068	1.31627	1.36724	2.03315	2.08821	PF3D7_1033200	312	S	___1	RIS(0.017)T(0.017)S(0.966)R	5	PNPNTHGPPSRRISTSRSSGSSNRSSSGTST	PF10_0323
PF3D7_1445700		conserved Plasmodium protein, unknown function	No	0.718382	-2.07555	-1.35717	-2.34879	-1.80231	-1.3647	-1.34963	PF3D7_1445700	237	S	___1	S(0.016)AES(0.984)NDKKK	4	RRQQEKKLNSNKSAESNDKKKKKNEENNTEK	PF14_0434
PF3D7_0305300		conserved Plasmodium membrane protein, unknown function	No	0.718342	-3.9769	-3.25855	-4.08103	-3.87277	-3.25561	-3.2615	PF3D7_0305300	21	S	___1	MDVY(0.014)KEENS(0.015)DLLNHQEEEIS(0.904)RNS(0.065)NINDEFS(0.001)ETQLR	20	KEENSDLLNHQEEEISRNSNINDEFSETQLR	MAL3P2.17;PFC0240c
PF3D7_1133700		FHA domain-containing protein, putative	No	0.718277	-1.64763	-0.929355	-1.65063	-1.64463	-0.92906	-0.929649	PF3D7_1133700	542	S	___1	DT(0.012)NNS(0.985)IES(0.992)IILT(0.01)K	5	AERYDTELTTKDTNNSIESIILTKGKGADKR	PF11_0347
PF3D7_0936800		Plasmodium exported protein (PHISTc), unknown function	Yes	0.717573	-0.707747	0.00982571	-0.65712	-0.758375	-0.0389595	0.0586109	PF3D7_0936800	277	T	___1	GYLGEVES(0.5)ET(0.5)IK	10	RGIFAKGYLGEVESETIKKKTEHHENVNEDN	PFI1780w
PF3D7_0813300		conserved Plasmodium protein, unknown function	No	0.713063	0.759382	1.47245	0.93688	0.581884	1.61665	1.32824	PF3D7_0813300	240	S	___1	RS(1)LDNKSDGPLK	2	VENKKKGGDKKKNKRSLDNKSDGPLKKSKID	MAL8P1.95
PF3D7_1120000		conserved Plasmodium protein, unknown function	No	0.711937	-0.0911922	0.620745	-0.0668392	-0.115545	0.75321	0.488279	PF3D7_1120000	755	S	___1	HLES(1)LKEEK	4	TSSTFIPSAKLKHLESLKEEKKKEVKTNIQP	PF11_0207
PF3D7_0708400	HSP90	heat shock protein 90	No	0.711062	1.90273	2.6138	1.93629	1.86917	2.50031	2.72728	PF3D7_0708400	573	S	___1	EGLDIDDS(1)EEAKK	8	KKLKCCTKEGLDIDDSEEAKKDFETLKAEYE	PF07_0029
PF3D7_0206300	AROM	pentafunctional AROM polypeptide, putative, pseudogene	No	0.710547	0.871408	1.58195	0.95944	0.783375	1.66543	1.49848	PF3D7_0206300	2508	S	___1	KVS(0.014)FS(0.89)DVCEIY(0.096)VDGPNFENK	5	QHTSTKKKIQKKVSFSDVCEIYVDGPNFENK	PF02_0059;PF02_0060;PF3D7_0206400;PFB0279w;PFB0280w
PF3D7_1230800	WTAP	pre-mRNA-splicing regulator, putative	No	0.709723	3.54062	4.25035	3.62063	3.46062	4.24041	4.26028	PF3D7_1230800	246	S	___1	NS(1)YSNINISK	2	YNESYNDIQKDYHKNSYSNINISKKKRNHNI	2277.t00297;MAL12P1.297;PFL1485w
PF3D7_1436300	PTEX150	translocon component PTEX150	No	0.708714	-1.24322	-0.534504	-1.20265	-1.28378	-0.662249	-0.406759	PF3D7_1436300	822	Y	___1	KNS(0.034)EY(0.004)DLY(0.962)DDDDKEGGNFK	8	ENLIKFLKKNSEYDLYDDDDKEGGNFKSPLY	PF14_0344;Pf112
PF3D7_1409600		conserved Plasmodium protein, unknown function	No	0.707663	0.764458	1.47212	0.878611	0.650305	1.3793	1.56494	PF3D7_1409600	705	S	___1	RNS(1)DNS(0.955)Y(0.011)EEEPS(0.015)NT(0.01)T(0.008)K	3	LHHVDNLQHIRHRRNSDNSYEEEPSNTTKAK	PF14_0094
PF3D7_0501400	FIRA	interspersed repeat antigen	Yes	0.706013	0.394928	1.10094	0.42654	0.363316	1.06607	1.13581	PF3D7_0501400	1336	S	___1	AS(0.25)LGS(0.75)VK	5	SFGRKDKKDKKASLGSVKETYEKETQTEEQE	MAL5P1.15;PFE0070w
PF3D7_0401800	PfD80	Plasmodium exported protein (PHISTb), unknown function	Yes	0.705897	-2.42152	-1.71562	-2.40697	-2.43607	-1.80782	-1.62342	PF3D7_0401800	283	T	___2	LPS(0.062)T(0.142)GS(0.871)T(0.935)IRFPS(0.51)T(0.424)GS(0.047)S(0.009)R	7	GSTSGSTTRLPSTGSTIRFPSTGSSRLEDYE	MAL4P1.16;PFD0080c
PF3D7_1347700	ECT	ethanolamine-phosphate cytidylyltransferase	No	0.704577	2.67043	3.37501	2.74602	2.59484	3.30408	3.44593	PF3D7_1347700	361	T	___1	NKDNPNILEITEEQIY(0.102)NS(0.871)ELGIS(0.284)DDNKT(0.743)K	28	EQIYNSELGISDDNKTKVSEQQHDIDTLPKN	PF13_0253
PF3D7_0202000	KAHRP	knob-associated histidine-rich protein	Yes	0.703841	1.23229	1.93613	0.888731	1.57585	1.91251	1.95975	PF3D7_0202000	472	S	___1	S(0.001)DGS(0.999)KAHEK	4	ENKNKEKTNNSKSDGSKAHEKKENETKNTAG	PF02_0020;PFB0100c
PF3D7_1466400	ApiAP2	AP2 domain transcription factor AP2-SP	No	0.703802	0.779663	1.48347	0.780781	0.778545	1.30663	1.6603	PF3D7_1466400	670	S	___1	HLS(0.98)QT(0.02)IDMNQK	3	NNNGTSSQSTNPKHLSQTIDMNQKQSSHTSQ	PF14_0633
PF3D7_1140700		conserved Plasmodium protein, unknown function	No	0.703253	-0.500077	0.203176	-0.441969	-0.558186	0.14723	0.259121	PF3D7_1140700	88	T	___1	NYDS(0.168)DENT(0.831)WEPFENLSPNLK	8	FEFYIKWKNYDSDENTWEPFENLSPNLKGQA	PF11_0418
PF3D7_1328500		alpha/beta-hydrolase, putative	No	0.702413	1.61804	2.32045	1.61673	1.61934	2.26333	2.37757	PF3D7_1328500	922	S	___1	FFENS(1)YIK	5	SEDYSNQTCNKFFENSYIKLSKSTLKNEKEL	PF13_0153
PF3D7_0706500		conserved Plasmodium protein, unknown function	No	0.702283	-3.17411	-2.47183	-3.45755	-2.89068	-2.55317	-2.39049	PF3D7_0706500	1519	S	___1	KDS(0.007)S(0.007)NKNDNS(0.536)S(0.449)NQGDK	10	KLNFNKKDSSNKNDNSSNQGDKKLSDRKNGN	MAL7P1.204
PF3D7_0305200		conserved Plasmodium protein, unknown function	No	0.698539	-1.38021	-0.681674	-1.25226	-1.50817	-0.676199	-0.687149	PF3D7_0305200	188	S	___1	S(0.008)T(0.008)S(0.505)INY(0.02)T(0.455)DNS(0.005)FVLNK	3	YENVLNDNFIKSRSTSINYTDNSFVLNKENL	MAL3P2.16;PFC0235w
PF3D7_0904600		ubiquitin specific protease, putative	No	0.698287	-2.29737	-1.59908	-2.39976	-2.19497	-1.5191	-1.67906	PF3D7_0904600	1151	S	___2	VCS(1)S(1)NCGEQQVTEK	3	HIKNAQNNTTNNRVCSSNCGEQQVTEKINNI	PFI0225w
PF3D7_0904600		ubiquitin specific protease, putative	No	0.698287	-2.29737	-1.59908	-2.39976	-2.19497	-1.5191	-1.67906	PF3D7_0904600	1152	S	___2	VCS(1)S(1)NCGEQQVTEK	4	IKNAQNNTTNNRVCSSNCGEQQVTEKINNIL	PFI0225w
PF3D7_0726100		Plasmodium exported protein, unknown function	Yes	0.698162	-0.303052	0.39511	-0.327299	-0.278805	0.323481	0.46674	PF3D7_0726100	170	S	___1	RIYS(1)NAEK	4	EKLKNKKLESPKRIYSNAEKKIKEEKFQGHK	PF07_0107
PF3D7_1229500	CCT3	T-complex protein 1 subunit gamma	No	0.697633	-2.41278	-1.71515	-2.45184	-2.37373	-1.75632	-1.67398	PF3D7_1229500	35	S	___1	AVS(1)DIVK	3	GRKTQLSNIQASRAVSDIVKTTLGPMAMLKM	2277.t00285;MAL12P1.285;PFL1425w
PF3D7_0708400	HSP90	heat shock protein 90	No	0.696418	2.5347	3.23112	2.62138	2.44802	3.21822	3.24401	PF3D7_0708400	218	T	___1	QNEKEIT(1)AS(1)EEEEGEGEGEREGEEEEEK	7	FPIKLYCERQNEKEITASEEEEGEGEGEREG	PF07_0029
PF3D7_1039000	FIKK10.2	serine/threonine protein kinase, FIKK family	Yes	0.695518	2.72951	3.42502	2.82378	2.63523	3.40558	3.44447	PF3D7_1039000	148	S	___1	GKS(1)NLYHNGK	3	YKKRRGKLREKKKGKSNLYHNGKNKKNVSNC	PF10_0380
PF3D7_1238800	ACS11	acyl-CoA synthetase	Yes	0.695518	-1.33749	-0.64197	-1.6297	-1.04527	-0.162319	-1.12162	PF3D7_1238800	339	S	___2	MNT(1)NNRS(1)IDER	7	NNNNNNIQKMNTNNRSIDERNNYLMKQIKKN	2277.t00376;MAL12P1.374;PFL1880w
PF3D7_1238800	ACS11	acyl-CoA synthetase	Yes	0.695518	-1.33749	-0.64197	-1.6297	-1.04527	-0.162319	-1.12162	PF3D7_1238800	335	T	___2	MNT(1)NNRS(1)IDER	3	NNNNNNNNNNIQKMNTNNRSIDERNNYLMKQ	2277.t00376;MAL12P1.374;PFL1880w
PF3D7_0831000	GEXP09	Plasmodium exported protein (PHISTb), unknown function	Yes	0.693406	-0.713696	-0.0202904	-0.690119	-0.737274	-0.0739403	0.0333595	PF3D7_0831000	119	S	___1	S(1)LNGEYSDNPLFDYK	1	KDDNISNKWYEENKRSLNGEYSDNPLFDYKL	MAL8P1.2
PF3D7_0730900	PTP4	EMP1-trafficking protein	Yes	0.693248	4.88732	5.58057	5.0175	4.75714	5.45257	5.70856	PF3D7_0730900	1178	S	___1	VEKEMS(1)IHDGMK	6	YKHLTDEENKVEKEMSIHDGMKGQKYGSKNV	MAL7P1.171
PF3D7_0922500	PGK	phosphoglycerate kinase	No	0.693177	-1.96854	-1.27536	-1.98544	-1.95164	-1.37734	-1.17339	PF3D7_0922500	351	S	___1	GS(1)IECLNLVVEVTK	2	NGPQGVFEMPNFAKGSIECLNLVVEVTKKGA	PFI1105w
PF3D7_0206300	AROM	pentafunctional AROM polypeptide, putative, pseudogene	No	0.693003	-1.82818	-1.13518	-1.85642	-1.79995	-0.99832	-1.27204	PF3D7_0206300	2506	S	___1	KVS(0.5)FS(0.5)DVCEIYVDGPNFENK	3	DNQHTSTKKKIQKKVSFSDVCEIYVDGPNFE	PF02_0059;PF02_0060;PF3D7_0206400;PFB0279w;PFB0280w
PF3D7_0215300	ACS8	acyl-CoA synthetase	Yes	0.692713	0.259208	0.951921	0.284191	0.234224	0.875521	1.02832	PF3D7_0215300	855	S	___2	S(0.955)T(0.044)DAS(0.001)LKIPEK	1	QQNNMSNITLKNTLKSTDASLKIPEKNKVQT	PF02_0144;PFB0695c
PF3D7_0818000	SNRNP27	conserved protein, unknown function	No	0.691758	1.1866	1.87836	1.25291	1.12029	1.8737	1.88301	PF3D7_0818000	292	S	___1	NQNQDKNQS(1)QDKYQNEEK	9	DHDNKNKNQNQDKNQSQDKYQNEEKNNDILN	MAL8P1.71
PF3D7_0220000	LSA3	liver stage antigen 3	No	0.691318	1.02422	1.71554	1.10874	0.939705	1.63674	1.79434	PF3D7_0220000	1222	S	___1	GDMELGDMDKES(1)LEDVTAK	12	DMLKGDMELGDMDKESLEDVTAKLGERVESL	PF02_0187;PFB0915w
PF3D7_1342000		40S ribosomal protein S6	No	0.691017	0.218073	0.90909	0.0356503	0.400496	0.89238	0.9258	PF3D7_1342000	15	S	___1	S(1)IEIDDEKK	1	_MKLNISNPLNNVQKSIEIDDEKKLLPFMEK	PF13_0228
PF3D7_1128600	NOT2	CCR4-NOT transcription complex subunit 2, putative	No	0.689682	-0.317872	0.37181	-0.214159	-0.421585	0.31114	0.43248	PF3D7_1128600	313	T	___1	TIINDDVVYDINEEHT(1)S(1)ADEKIEK	16	TIINDDVVYDINEEHTSADEKIEKLRNDDIL	PF11_0297
PF3D7_1039000	FIKK10.2	serine/threonine protein kinase, FIKK family	Yes	0.688972	2.05349	2.74247	2.11661	1.99038	2.70441	2.78052	PF3D7_1039000	353	T	___1	FDGDQENIT(0.997)S(0.141)S(0.861)FER	9	NDIKKRRFDGDQENITSSFERTQKSVKYDSD	PF10_0380
PF3D7_0702500		Plasmodium exported protein, unknown function	Yes	0.686519	0.257637	0.944156	0.24761	0.267664	0.836761	1.05155	PF3D7_0702500	155	S	___2	NNSDGSTENHLSGS(0.004)NS(0.995)DGR	16	NNSDGSTENHLSGSNSDGRNSSQHSVGSHSV	PF07_0008
PF3D7_0701600	MC-2TM	Pfmc-2TM Maurer's cleft two transmembrane protein	Yes	0.686293	-3.09932	-2.41302	-3.17305	-3.02559	-2.5653	-2.26075	PF3D7_0701600	86	S	___1	KNPDDQISDLVS(1)LVDNMNITQEK	12	GSKKKNPDDQISDLVSLVDNMNITQEKKNEI	MAL7P1.5
PF3D7_0916700	HoMu	RNA-binding protein musashi, putative	No	0.686192	-2.62861	-1.94242	-2.70759	-2.54963	-2.0005	-1.88433	PF3D7_0916700	82	S	___1	GDEEEHDEKS(1)LGEDNK	10	SNISIKGDEEEHDEKSLGEDNKSVKDDESEA	PFI0820c
PF3D7_1352400		conserved Plasmodium protein, unknown function	No	0.683908	-6.20595	-5.52204	-6.0631	-6.34879	-5.52204	NaN	PF3D7_1352400	8	Y	___1	MNDFS(0.462)EEY(0.538)DFMQR	8	________MNDFSEEYDFMQRIHKVEGYNEC	MAL13P1.266
PF3D7_0603600		conserved Plasmodium protein, unknown function	No	0.683632	-1.70747	-1.02384	-1.67088	-1.74406	-1.03035	-1.01733	PF3D7_0603600	1091	S	___1	EGRIS(0.988)NT(0.012)R	5	DNQENNNFFSKEGRISNTRDVIKNEEKHSKK	2270.t00333;MAL6P1.39;PFF0175c
PF3D7_0401800	PfD80	Plasmodium exported protein (PHISTb), unknown function	Yes	0.683358	-0.618692	0.0646658	-0.818769	-0.418615	0.0523014	0.0770302	PF3D7_0401800	166	T	___1	SASTAS(0.209)T(0.791)AR	7	SASAASTTRSASTASTARSASTASTASAASA	MAL4P1.16;PFD0080c
PF3D7_1010600	eIF2beta	eukaryotic translation initiation factor 2 subunit beta	No	0.683003	-1.99253	-1.30953	-1.97098	-2.01409	-1.39776	-1.2213	PF3D7_1010600	199	S	___1	RS(1)VTTIK	2	TRLFHQHCNACGAKRSVTTIKSGFHALGRGE	PF10_0103
PF3D7_0301600	GEXP21	Plasmodium exported protein (hyp1), unknown function	Yes	0.682873	-3.80463	-3.12176	-3.73402	-3.87525	-3.23789	-3.00563	PF3D7_0301600	598	S	___1	IS(0.802)T(0.156)S(0.041)SHSTR	2	DPSEYKNSPFKESKISTSSHSTRSYENEFNL	MAL3P8.14;PFC0080c
PF3D7_0401800	PfD80	Plasmodium exported protein (PHISTb), unknown function	Yes	0.682262	3.39952	4.08179	3.49	3.30905	3.96955	4.19402	PF3D7_0401800	65	S	___1	SSSCSS(1)LASTTK	6	EEKAEDDYKKSSSCSSLASTTKRSPSTASTS	MAL4P1.16;PFD0080c
PF3D7_0719700	RPS10	40S ribosomal protein S10, putative	No	0.681883	1.42913	2.11102	1.48384	1.37442	2.06326	2.15877	PF3D7_0719700	118	S	___1	MDEDIS(1)RDVR	6	SKKTVNRAPKMDEDISRDVRQPMGRGRAFDR	PF07_0080
PF3D7_0402100		Plasmodium exported protein (PHISTb), unknown function	Yes	0.681717	3.16071	3.84243	3.27484	3.04659	3.77197	3.91289	PF3D7_0402100	84	S	___1	LTDVINYGEGS(1)LLK	11	GKLYKLTDVINYGEGSLLKQVPKEESENSNN	MAL4P1.19;PFD0095c
PF3D7_0102200	RESA	ring-infected erythrocyte surface antigen	Yes	0.681337	2.40604	3.08738	2.56341	2.24867	2.94006	3.2347	PF3D7_0102200	384	T	___1	AS(0.151)IT(0.816)NS(0.033)AINYYDTVK	4	VNEYGDILPSLRASITNSAINYYDTVKDGVY	MAL1P1.13;PFA0110w
PF3D7_0401800	PfD80	Plasmodium exported protein (PHISTb), unknown function	Yes	0.681242	-0.0955973	0.585645	-0.082119	-0.109076	0.49589	0.6754	PF3D7_0401800	360	Y	___1	NLDLY(1)DEHEAKK	5	DCKDAANYILKNLDLYDEHEAKKHASDRTKT	MAL4P1.16;PFD0080c
PF3D7_1436300	PTEX150	translocon component PTEX150	No	0.681157	-1.53568	-0.854525	-1.44786	-1.6235	-0.89366	-0.81539	PF3D7_1436300	950	Y	___1	NNS(0.024)NDDDDMDNGY(0.964)VT(0.011)FDGK	13	NTKNNSNDDDDMDNGYVTFDGKNKVSENDDD	PF14_0344;Pf112
PF3D7_1131800		oxysterol-binding protein, putative	No	0.680547	-3.03925	-2.3587	-2.69674	-3.38175	-2.48067	-2.23673	PF3D7_1131800	807	S	___2	NT(0.018)VS(0.983)T(0.999)EDDIALGDVR	4	ILNNKNINETKRNTVSTEDDIALGDVRDGLI	PF11_0327
PF3D7_1131800		oxysterol-binding protein, putative	No	0.680547	-3.03925	-2.3587	-2.69674	-3.38175	-2.48067	-2.23673	PF3D7_1131800	808	T	___2	NT(0.018)VS(0.983)T(0.999)EDDIALGDVR	5	LNNKNINETKRNTVSTEDDIALGDVRDGLIT	PF11_0327
PF3D7_1431700		60S ribosomal protein L14, putative	No	0.680308	-0.895883	-0.215574	-0.928909	-0.862856	-0.346359	-0.0847893	PF3D7_1431700	124	T	___1	RDEAT(1)DFER	5	KLGKKMIIKKKRDEATDFERFQVYFAKRELK	PF14_0296
PF3D7_0532300		Plasmodium exported protein (PHISTb), unknown function	Yes	0.679213	0.912173	1.59139	0.924021	0.900326	1.49492	1.68785	PF3D7_0532300	346	T	___1	NYSTHENT(1)YPTLK	8	FKNGKFLKNYSTHENTYPTLKTLLEKYAITD	MAL5P1.314;PFE1600w
PF3D7_0401800	PfD80	Plasmodium exported protein (PHISTb), unknown function	Yes	0.678873	2.92939	3.60826	2.93347	2.92531	3.40123	3.8153	PF3D7_0401800	183	S	___1	SASTASTASAASAAS(0.962)T(0.036)T(0.001)R	15	RSASTASTASAASAASTTRSASAASTTRSAS	MAL4P1.16;PFD0080c
PF3D7_1466400	ApiAP2	AP2 domain transcription factor AP2-SP	No	0.678738	0.678238	1.35698	0.71422	0.642256	1.15965	1.5543	PF3D7_1466400	672	T	___1	HLS(0.448)QT(0.552)IDMNQK	5	NGTSSQSTNPKHLSQTIDMNQKQSSHTSQYS	PF14_0633
PF3D7_0801800		mannose-6-phosphate isomerase, putative	No	0.677517	-1.8732	-1.19568	-1.99184	-1.75456	-1.23718	-1.15419	PF3D7_0801800	118	S	___1	DNNKS(1)NDDDNNKNNNNNDK	5	NDINNVSKNIRDNNKSNDDDNNKNNNNNDKY	MAL8P1.156
PF3D7_1128600	NOT2	CCR4-NOT transcription complex subunit 2, putative	No	0.677338	0.734057	1.4114	0.78582	0.682295	1.35248	1.47031	PF3D7_1128600	314	S	___1	TIINDDVVYDINEEHT(1)S(1)ADEKIEK	17	IINDDVVYDINEEHTSADEKIEKLRNDDILK	PF11_0297
PF3D7_1329500		conserved Plasmodium protein, unknown function	No	0.677133	-0.741173	-0.0640402	-0.62904	-0.853306	-0.0725498	-0.0555305	PF3D7_1329500	1061	T	___1	Y(0.002)EIS(0.404)T(0.582)ENNES(0.004)T(0.004)T(0.004)LHLPMNDMDVGK	5	HNEYNEEIDVKYEISTENNESTTLHLPMNDM	PF13_0162
PF3D7_0202400	PTEF	gamete antigen 27/25, putative	No	0.675978	1.98545	2.66143	2.04726	1.92364	2.59831	2.72454	PF3D7_0202400	563	T	___1	DEEET(1)EEDEKETEVEK	5	ETKVEEKKTERDEEETEEDEKETEVEKKKTE	PF02_0024;PFB0115w
PF3D7_1128600	NOT2	CCR4-NOT transcription complex subunit 2, putative	No	0.675887	-1.01644	-0.340555	-1.10239	-0.930494	-0.4049	-0.276211	PF3D7_1128600	306	Y	___2	TIINDDVVY(0.982)DINEEHT(0.18)S(0.838)ADEKIEK	9	KNGNNQKTIINDDVVYDINEEHTSADEKIEK	PF11_0297
PF3D7_1011800	PREBP	PRE-binding protein	No	0.675877	1.70045	2.37633	1.5939	1.807	2.23852	2.51414	PF3D7_1011800	258	S	___1	KS(1)ENDLKK	2	DWKKEIKLKEDERKKSENDLKKKFVKLNKAD	PF10_0115
PF3D7_1407100	NOP1	rRNA 2'-O-methyltransferase fibrillarin, putative	No	0.675868	1.13566	1.81153	1.15884	1.11248	1.85766	1.7654	PF3D7_1407100	4	S	___1	T(0.003)DS(0.997)FRGGSGNFK	3	____________MTDSFRGGSGNFKRNSNNF	PF14_0068
PF3D7_1039000	FIKK10.2	serine/threonine protein kinase, FIKK family	Yes	0.674728	1.87331	2.54804	1.95084	1.79578	2.51551	2.58057	PF3D7_1039000	355	S	___1	RFDGDQENITS(0.019)S(0.981)FER	12	IKKRRFDGDQENITSSFERTQKSVKYDSDES	PF10_0380
PF3D7_0730900	PTP4	EMP1-trafficking protein	Yes	0.672792	3.66547	4.33826	3.75702	3.57392	4.27587	4.40065	PF3D7_0730900	1815	S	___1	IEKDANS(0.982)GS(0.018)ELKNTNNK	7	GTNVPDKLKIEKDANSGSELKNTNNKEKEVK	MAL7P1.171
PF3D7_0202000	KAHRP	erythrocyte membrane protein 1, PfEMP1	Yes	0.671779	6.76371	7.43549	6.63571	6.8917	7.56449	7.30648	PF3D7_0202000;PF3D7_1255200	548;1772	S	___1	EAS(0.991)T(0.007)S(0.002)KEAT(0.047)KEAS(0.774)T(0.152)S(0.026)K	3	QCAAEGATKGATKEASTSKEATKEASTSKEA	PF02_0020;PFB0100c
PF3D7_0911900	ICP	falstatin	Yes	0.671659	-2.20487	-1.53321	-2.06694	-2.34281	-1.69708	-1.36935	PF3D7_0911900	237	S	___1	IFS(0.395)EEENT(0.602)EVES(0.925)AENNHT(0.039)NS(0.039)LNPNESCDQIIK	12	LKARIFSEEENTEVESAENNHTNSLNPNESC	PFI0580c
PF3D7_1316500	PRP40	pre-mRNA-processing factor 40, putative	No	0.671612	-2.70694	-2.03533	-2.63823	-2.77565	-1.98761	-2.08305	PF3D7_1316500	906	S	___1	TIENAS(0.018)S(0.982)	7	SAQTIESLRTIENASS_______________	PF13_0091
PF3D7_1323400	RPL23	60S ribosomal protein L23	No	0.671267	1.03699	1.70826	1.0312	1.04279	1.68199	1.73453	PF3D7_1323400	175	S	___1	LS(1)GEHDALEVANK	2	VLNTLNGDKKAYVRLSGEHDALEVANKIGIL	PF13_0132
PF3D7_0215300	ACS8	acyl-CoA synthetase	Yes	0.669852	0.573823	1.24368	0.583691	0.563955	1.1882	1.29915	PF3D7_0215300	859	S	___2	NT(0.396)LKS(0.602)T(0.007)DAS(0.995)LKIPEK	9	MSNITLKNTLKSTDASLKIPEKNKVQTNKSR	PF02_0144;PFB0695c
PF3D7_0818900	HSP70	heat shock protein 70	No	0.669573	-2.78471	-2.11513	-2.73721	-2.8322	-2.21032	-2.01995	PF3D7_0818900	96	S	___1	FT(0.002)ES(0.003)S(0.021)VQS(0.974)DMKHWPFTVK	8	AKRLIGRKFTESSVQSDMKHWPFTVKSGVDE	PF08_0054
PF3D7_1403700	TRAM	translocation associated membrane protein, putative	No	0.668879	-0.451813	0.217066	-0.39332	-0.510305	0.361631	0.0725002	PF3D7_1403700	342	S	___1	IT(0.003)DIRS(0.997)DNEDDSTSTMESIKK	6	FIIKTMKNEKITDIRSDNEDDSTSTMESIKK	PF14_0034
PF3D7_0106300	ATP6	calcium-transporting ATPase	No	0.668372	1.22165	1.89002	1.08084	1.36246	1.99297	1.78707	PF3D7_0106300	482	S	___2	S(1)NENTIISR	1	SRSGAKRNIPLKEMKSNENTIISRGSKILED	MAL1P1.54;PFA0310c
PF3D7_0532400	LyMP	lysine-rich membrane-associated PHISTb protein	Yes	0.667098	-1.42862	-0.761519	-1.34478	-1.51245	-0.74836	-0.774679	PF3D7_0532400	338	S	___1	RPNYYPS(0.841)NS(0.159)APHVIDYIYK	7	QSTNPQVYRRPNYYPSNSAPHVIDYIYKVGY	MAL5P1.315;PFE1605w
PF3D7_0401800	PfD80	Plasmodium exported protein (PHISTb), unknown function	Yes	0.666082	2.96408	3.63017	3.09026	2.8379	3.5776	3.68273	PF3D7_0401800	292	S	___2	FPS(0.333)T(0.372)GS(0.441)S(0.854)RLEDYEK	7	LPSTGSTIRFPSTGSSRLEDYEKEGSNVDIT	MAL4P1.16;PFD0080c
PF3D7_0112200	MRP1	multidrug resistance-associated protein 1	No	0.665723	-3.62897	-2.96325	-3.47899	-3.77896	-2.81854	-3.10796	PF3D7_0112200	244	S	___2	KFS(0.678)S(0.129)QT(0.196)EIDEIS(0.997)R	12	NTYRKFSSQTEIDEISRDFLSIGKNASSSSS	MAL1P3.03;PFA0590w
PF3D7_0202000	KAHRP	knob-associated histidine-rich protein	Yes	0.664532	-3.2605	-2.59596	-3.06783	-3.45317	-2.53714	-2.65479	PF3D7_0202000	600	T	___1	GAS(0.757)T(0.835)T(0.864)AGS(0.271)T(0.268)T(0.005)GATTGANAVQSK	5	KEASTTEGATKGASTTAGSTTGATTGANAVQ	PF02_0020;PFB0100c
PF3D7_0802600	ACbeta	adenylyl cyclase beta	No	0.664523	0.120148	0.784671	0.23789	0.00240517	0.870071	0.69927	PF3D7_0802600	553	S	___1	RNS(1)LEDK	3	ENISKNNIKDNKRRNSLEDKIKKRFTLLSTD	MAL8P1.150
PF3D7_0111500		UMP-CMP kinase, putative	No	0.661552	0.487773	1.14933	0.278831	0.696714	0.99733	1.30132	PF3D7_0111500	212	S	___1	KDS(0.997)FS(0.003)FKK	3	ELNDQGESGVEKKKDSFSFKKLDENANIKNI	MAL1P2.40;PFA0555c
PF3D7_1027300	nPrx	peroxiredoxin	No	0.660623	0.0747128	0.735335	-0.25124	0.400665	0.72727	0.743401	PF3D7_1027300	290	S	___1	KNS(1)VVK	3	KSNAKGANKKGGKKNSVVKKEDNKKKGKNNK	PF10_0268
PF3D7_1344100		krox-like protein, putative	No	0.660568	0.172597	0.833165	0.3384	0.00679398	0.94725	0.71908	PF3D7_1344100	222	Y	___1	NSFDLVY(0.784)S(0.216)DSNVNTINK	7	DDNSLDKKRNSFDLVYSDSNVNTINKNNKKE	MAL13P1.395
PF3D7_1428300		proliferation-associated protein 2g4, putative	No	0.660188	0.534292	1.19448	0.5415	0.527084	1.16514	1.22382	PF3D7_1428300	359	S	___1	NILSLPLS(1)GK	8	SIQDETLKNILSLPLSGKKKKNKAKNNEEAN	PF14_0261
PF3D7_1140700		conserved Plasmodium protein, unknown function	No	0.659828	3.90997	4.5698	4.04307	3.77687	4.51904	4.62055	PF3D7_1140700	971	S	___1	SLS(1)DFIDEDKIFK	3	NSNSNIRNMIHNKSLSDFIDEDKIFKQKSGK	PF11_0418
PF3D7_0702500		Plasmodium exported protein, unknown function	Yes	0.659701	0.795033	1.45473	0.762741	0.827326	1.37266	1.53681	PF3D7_0702500	142	S	___2	NNS(1)DGS(0.961)T(0.039)ENHLSGSNSDGR	3	HNLDGQKESQLYKNNSDGSTENHLSGSNSDG	PF07_0008
PF3D7_0918900	gammaGCS	gamma-glutamylcysteine synthetase	No	0.658013	1.30961	1.96762	1.27466	1.34455	1.84122	2.09402	PF3D7_0918900	243	S	___1	ISSIEMVSYEMDENKSTNFVNS(0.999)DTVFAK	22	VSYEMDENKSTNFVNSDTVFAKNDEEGEVEE	PFI0925w
PF3D7_1227700	KIC2	conserved Plasmodium protein, unknown function	No	0.657509	1.79694	2.45445	1.81246	1.78141	2.37638	2.53251	PF3D7_1227700	212	T	___1	LEEIIEENESHT(1)ERTEGDNFMMSK	12	KIFKLEEIIEENESHTERTEGDNFMMSKMKS	2277.t00268;MAL12P1.268;PFL1340c
PF3D7_1343700	Kelch13	kelch protein K13	No	0.656718	-1.32336	-0.666644	-1.39768	-1.24904	-0.727989	-0.605299	PF3D7_1343700	97	S	___1	DFLPS(1)NLS(1)R	5	SVLDSNFDSKKDFLPSNLSRTFNNMSKDNIG	PF13_0238
PF3D7_0206300	AROM	pentafunctional AROM polypeptide, putative, pseudogene	No	0.656338	-3.50015	-2.84381	-3.39948	-3.60083	-2.93571	-2.75192	PF3D7_0206300	1449	S	___1	NDDS(0.445)AS(0.542)KGT(0.013)NEHMMQR	6	EEEGNNNIIKNDDSASKGTNEHMMQRINDAE	PF02_0059;PF02_0060;PF3D7_0206400;PFB0279w;PFB0280w
PF3D7_0614400	CWF7	pre-mRNA-splicing factor CWF7, putative	No	0.656118	0.248503	0.904621	0.372952	0.124054	0.898232	0.911011	PF3D7_0614400	8	S	___1	MDMQEQIS(0.999)DKGADDY(0.001)DDTLVELK	8	________MDMQEQISDKGADDYDDTLVELK	2270.t00034;MAL6P1.282;PFF0695w
PF3D7_0209800	UAP56	ATP-dependent RNA helicase UAP56	No	0.656068	-0.0389328	0.617135	-0.12187	0.0440044	0.45113	0.78314	PF3D7_0209800	48	S	___1	GGAMRGS(0.991)YAT(0.009)VHTGGFK	7	NNILNNNNKGGAMRGSYATVHTGGFKDFFLK	PF02_0093;PFB0445c
PF3D7_0206300	AROM	pentafunctional AROM polypeptide, putative, pseudogene	No	0.653624	-2.46719	-1.81357	-2.52088	-2.41351	-1.75415	-1.87299	PF3D7_0206300	2514	Y	___1	KVS(0.372)FS(0.063)DVCEIY(0.565)VDGPNFENK	11	KKIQKKVSFSDVCEIYVDGPNFENKNYDDNI	PF02_0059;PF02_0060;PF3D7_0206400;PFB0279w;PFB0280w
PF3D7_0813000	KIC7	conserved Plasmodium protein, unknown function	No	0.653342	1.30977	1.96311	1.31949	1.30005	1.8657	2.06052	PF3D7_0813000	338	S	___1	LNEDS(1)DINNK	5	KMNYPNNFNVKLNEDSDINNKMKYNNKMSMV	PF08_0083
PF3D7_0402400	GEXP18	Plasmodium exported protein, unknown function	Yes	0.652907	-1.84165	-1.18874	-1.74319	-1.94011	-1.2495	-1.12798	PF3D7_0402400	132	S	___1	LGNDS(0.001)IGDNIS(0.974)IVDFNGENNVEVT(0.024)FPDDNINEK	11	SENVKLGNDSIGDNISIVDFNGENNVEVTFP	MAL4P1.23;PFD0115c
PF3D7_1221900		conserved Plasmodium membrane protein, unknown function	No	0.652848	-2.76362	-2.11077	-2.93687	-2.59037	-2.2632	-1.95834	PF3D7_1221900	232	S	___1	FDLNANPET(0.075)LIINS(0.73)DINT(0.155)Y(0.032)EPS(0.008)QNNVGPEIK	14	FKFDLNANPETLIINSDINTYEPSQNNVGPE	2277.t00211;MAL12P1.211;PFL1055c
PF3D7_0708400	HSP90	heat shock protein 90	No	0.652798	-0.182007	0.470791	-0.240259	-0.123755	0.529371	0.41221	PF3D7_0708400	155	S	___1	NNDDEQYVWESAAGGS(0.958)FT(0.04)VT(0.002)KDETNEK	16	NNDDEQYVWESAAGGSFTVTKDETNEKLGRG	PF07_0029
PF3D7_1412500	ACT2	actin II	No	0.651744	-1.15913	-0.507384	-1.10663	-1.21163	-0.473299	-0.54147	PF3D7_1412500	230	S	___1	S(0.6)EEHS(0.4)DEIEEIYELPDGNLITVGSER	1	KLCYIAMDYDEELKRSEEHSDEIEEIYELPD	PF14_0124
PF3D7_0201900	EMP3	erythrocyte membrane protein 3	Yes	0.650967	3.10327	3.75424	3.13724	3.06931	3.6203	3.88818	PF3D7_0201900	2426	S	___2	NVKDDELS(1)DNES(0.911)S(0.088)DNEKSK	12	DGLKNVKDDELSDNESSDNEKSKKNLRGKKN	PF02_0019;PFB0095c
PF3D7_0631100		Plasmodium exported protein (PHISTb), unknown function	Yes	0.650693	-1.71759	-1.0669	-1.72216	-1.71303	-1.12298	-1.01082	PF3D7_0631100;PF3D7_0601500	91;91	S	___1	INS(1)ICKDNNEDIVFLDELR	3	YLMISRRLPKIKRINSICKDNNEDIVFLDEL	PFF1510w
PF3D7_0201900	EMP3	erythrocyte membrane protein 3	Yes	0.649893	3.21985	3.86974	3.26038	3.17932	3.74002	3.99946	PF3D7_0201900	2422	S	___2	NVKDDELS(1)DNESSDNEK	8	NKPTDGLKNVKDDELSDNESSDNEKSKKNLR	PF02_0019;PFB0095c
PF3D7_1237900		conserved Plasmodium protein, unknown function	Yes	0.648348	-0.473567	0.174781	-0.54884	-0.398294	0.100071	0.249491	PF3D7_1237900	378	S	___2	YEEEEDIS(1)EIYEEDR	8	EGEHITIRYEEEEDISEIYEEDRASRIYEED	2277.t00367;MAL12P1.365;PFL1835w
PF3D7_1237900		conserved Plasmodium protein, unknown function	Yes	0.648348	-0.473567	0.174781	-0.54884	-0.398294	0.100071	0.249491	PF3D7_1237900	387	S	___2	YEEEEDIS(1)EIYEEDRAS(1)R	17	EEEEDISEIYEEDRASRIYEEDRASGIYEEE	2277.t00367;MAL12P1.365;PFL1835w
PF3D7_0918900	gammaGCS	gamma-glutamylcysteine synthetase	No	0.647348	-0.298287	0.349061	-0.31443	-0.282145	0.424171	0.273951	PF3D7_0918900	309	T	___1	NKEKDNT(1)PR	7	VYDDEIENKNKEKDNTPRSCNDYNNVNDSSN	PFI0925w
PF3D7_1200700	ACS7	acyl-CoA synthetase	Yes	0.646812	0.625134	1.27195	0.638311	0.611956	1.45843	1.08546	PF3D7_1200700	755	S	___1	S(0.051)GS(0.948)KS(0.001)DIK	3	LSGNSTGSMNNGKSGSKSDIKGGSKDDIKSG	2277.t00007;MAL12P1.7;PFL0035c
PF3D7_1142100		conserved Plasmodium protein, unknown function	No	0.645817	-1.47318	-0.82736	-1.14392	-1.80243	-0.78046	-0.87426	PF3D7_1142100	507	S	___1	ENNCEY(0.231)T(0.769)DVDETSNVFNNLS(1)DNYIK	20	EYTDVDETSNVFNNLSDNYIKNKNIRKQKRK	PF11_0433
PF3D7_1438400	MCA2	metacaspase-like protein	No	0.644283	1.71616	2.36044	1.8566	1.57571	2.31904	2.40184	PF3D7_1438400	1312	S	___1	SVHYDMDEILS(1)LK	11	KKKIKSVHYDMDEILSLKCKVYDELDTCLKC	PF14_0362;PF14_0363
PF3D7_1039000	FIKK10.2	serine/threonine protein kinase, FIKK family	Yes	0.643422	-0.896517	-0.253095	-0.868979	-0.924055	-0.252119	-0.25407	PF3D7_1039000	354	S	___1	RFDGDQENIT(0.618)S(0.704)S(0.678)FER	11	DIKKRRFDGDQENITSSFERTQKSVKYDSDE	PF10_0380
PF3D7_1134600		zinc finger protein, putative	No	0.643292	1.4366	2.0799	1.38274	1.49047	2.02658	2.13321	PF3D7_1134600	42	S	___1	SYS(1)QGDNEK	3	KNNNLSTLEKDKRSYSQGDNEKLICVQLNIE	PF11_0357
PF3D7_0801000		Plasmodium exported protein (PHISTc), unknown function	Yes	0.642337	1.11794	1.76028	1.2069	1.02898	1.70698	1.81358	PF3D7_0801000	966	S	___1	RS(0.001)NS(0.999)IPEGR	4	YPEEERYNYNNKRSNSIPEGRNYEENAYERG	PF08_0137
PF3D7_0405700		lysine decarboxylase, putative	No	0.642082	0.330363	0.972445	0.453131	0.207596	0.852201	1.09269	PF3D7_0405700	1192	S	___1	RYVYDEYNES(1)VKEYSPNDDTNYDATYK	10	KDGSEKRYVYDEYNESVKEYSPNDDTNYDAT	MAL4P1.56;PFD0280c;PFD0285c
PF3D7_0702500		Plasmodium exported protein, unknown function	Yes	0.642062	2.49154	3.13361	2.51651	2.46658	3.10001	3.1672	PF3D7_0702500	204	S	___1	NYS(0.977)LGNLS(0.023)TGTTS(0.002)QGS(0.987)T(0.01)SSR	16	NYSLGNLSTGTTSQGSTSSRHYSLGGQPSSS	PF07_0008
PF3D7_0716000		RNA-binding protein, putative	No	0.641593	-1.40861	-0.767015	-1.39048	-1.42673	-0.947699	-0.58633	PF3D7_0716000	491	S	___1	FDS(1)PPHS(1)CDEEDNIK	7	ERERRKSYKFDSPPHSCDEEDNIKLSKTTIS	PF07_0066
PF3D7_1448600	VTI1	SNARE protein, putative	No	0.641453	2.7458	3.38726	2.71914	2.77246	3.40838	3.36613	PF3D7_1448600	117	S	___1	YVS(1)AKDIETK	3	KQAKENKKLLKVRYVSAKDIETKGDIIQDQT	PF14_0464
PF3D7_0721600		40S ribosomal protein S5, putative	No	0.640471	-0.569052	0.0714197	-0.436739	-0.701365	0.0043602	0.138479	PF3D7_0721600	175	S	___1	SISECLAEEIINCANES(0.848)S(0.131)S(0.02)SYAIKK	17	ISECLAEEIINCANESSSSYAIKKKDEIERV	PF07_0088
PF3D7_0623100	NAB2	nuclear polyadenylated RNA-binding protein NAB2, putative	No	0.640282	-0.337017	0.303265	-0.12595	-0.548084	0.31485	0.291679	PF3D7_0623100	269	S	___2	ISDS(1)ADEYNNS(1)EKK	11	ITYKRISDSADEYNNSEKKNKAVLKPNPRFV	2270.t00119;MAL6P1.198;PFF1110c
PF3D7_1149000	Pf332	antigen 332, DBL-like protein	Yes	0.639807	-1.71643	-1.07662	-1.65087	-1.78198	-1.07909	-1.07415	PF3D7_1149000	4891	T	___1	S(0.106)S(0.137)T(0.757)DEIVEVEDLFTEEVKER	3	EQASTTEEFVEERSSTDEIVEVEDLFTEEVK	PF11_0506;PF11_0507
PF3D7_0713900		conserved Plasmodium protein, unknown function	No	0.639682	-0.815601	-0.17592	-0.778028	-0.853174	-0.255989	-0.09585	PF3D7_0713900	164	T	___1	MNMDT(0.589)S(0.411)MDKNDLIIDDVTK	5	YNESNDNKFFKMNMDTSMDKNDLIIDDVTKN	PF07_0053
PF3D7_1233600	AARP1	asparagine and aspartate rich protein 1	No	0.639637	-5.29729	-4.65765	-4.98717	-5.6074	-4.44073	-4.87457	PF3D7_1233600	730	S	___3	S(1)Y(1)NKMY(1)NNNK	1	IPCDDNKNIPRDDNKSYNKMYNNNKMNKELT	2277.t00324;MAL12P1.323;PFL1620w
PF3D7_1233600	AARP1	asparagine and aspartate rich protein 1	No	0.639637	-5.29729	-4.65765	-4.98717	-5.6074	-4.44073	-4.87457	PF3D7_1233600	731	Y	___3	S(1)Y(1)NKMY(1)NNNK	2	PCDDNKNIPRDDNKSYNKMYNNNKMNKELTY	2277.t00324;MAL12P1.323;PFL1620w
PF3D7_1233600	AARP1	asparagine and aspartate rich protein 1	No	0.639637	-5.29729	-4.65765	-4.98717	-5.6074	-4.44073	-4.87457	PF3D7_1233600	735	Y	___3	S(1)Y(1)NKMY(1)NNNK	6	NKNIPRDDNKSYNKMYNNNKMNKELTYNDEY	2277.t00324;MAL12P1.323;PFL1620w
PF3D7_1436300	PTEX150	translocon component PTEX150	No	0.639207	-2.02921	-1.39	-1.75799	-2.30042	-1.3925	-1.3875	PF3D7_1436300	243	S	___1	DNLQSFLS(0.123)S(0.797)LT(0.08)GNK	9	IGKMMNKDNLQSFLSSLTGNKDGSGKNPLSD	PF14_0344;Pf112
PF3D7_0401800	PfD80	Plasmodium exported protein (PHISTb), unknown function	Yes	0.638983	-1.53938	-0.900399	-1.61485	-1.46391	-0.940079	-0.86072	PF3D7_0401800	165	S	___1	SAS(0.001)T(0.028)AS(0.956)T(0.015)AR	6	RSASAASTTRSASTASTARSASTASTASAAS	MAL4P1.16;PFD0080c
PF3D7_0201900	EMP3	erythrocyte membrane protein 3	Yes	0.638518	-0.469883	0.168635	-0.35141	-0.588356	0.0894604	0.24781	PF3D7_0201900	2427	S	___2	NVKDDELS(0.999)DNES(0.026)S(0.974)DNEK	13	GLKNVKDDELSDNESSDNEKSKKNLRGKKN_	PF02_0019;PFB0095c
PF3D7_1006800	GBP2	single-strand telomeric DNA-binding protein GBP2, putative	No	0.637994	-0.199338	0.438656	-0.0265102	-0.372166	0.332701	0.544611	PF3D7_1006800	205	S	___1	NEDNS(0.5)S(0.5)KELIGVVIMENEYEAK	5	KHGRVVRADLKNEDNSSKELIGVVIMENEYE	PF10_0068
PF3D7_1006800	GBP2	single-strand telomeric DNA-binding protein GBP2, putative	No	0.637994	-0.199338	0.438656	-0.0265102	-0.372166	0.332701	0.544611	PF3D7_1006800	206	S	___1	NEDNS(0.5)S(0.5)KELIGVVIMENEYEAK	6	HGRVVRADLKNEDNSSKELIGVVIMENEYEA	PF10_0068
PF3D7_1000600	RIF	rifin	Yes	0.636473	-0.695778	-0.0593052	-0.63718	-0.754375	-0.24375	0.125139	PF3D7_1000600	73	S	___1	QT(0.5)S(0.5)QRFEEYEQR	3	DENMKSLKENFDRQTSQRFEEYEQRMIRKRK	PF10_0006
PF3D7_1000600	RIF	rifin	Yes	0.636473	-0.695778	-0.0593052	-0.63718	-0.754375	-0.24375	0.125139	PF3D7_1000600	72	T	___1	QT(0.5)S(0.5)QRFEEYEQR	2	NDENMKSLKENFDRQTSQRFEEYEQRMIRKR	PF10_0006
PF3D7_0220600		Plasmodium exported protein (hyp9), unknown function	Yes	0.635828	-0.474607	0.161221	-0.4457	-0.503515	0.1028	0.219641	PF3D7_0220600	130	S	___1	VNATS(0.001)ENMS(0.998)VGQWDYIMQYYGQSTPK	9	IPPDMIKVNATSENMSVGQWDYIMQYYGQST	PF02_0193;PFB0930w
PF3D7_0601900		conserved Plasmodium protein, unknown function	Yes	0.635717	3.263	3.89872	3.05994	3.46606	3.04615	4.75129	PF3D7_0601900	115	S	___1	S(0.002)HS(0.978)S(0.02)SSSVYASANAEN	3	ERKTSSSSRQAARSHSSSSSVYASANAEN__	2270.t00296;MAL6P1.22;PFF0090w
PF3D7_0505000		conserved Plasmodium membrane protein, unknown function	No	0.633193	1.4787	2.11189	1.37777	1.57962	2.05663	2.16715	PF3D7_0505000	869	S	___1	NNMYGSDES(1)DKNIFTIIK	9	NTNEHNKNNMYGSDESDKNIFTIIKEKNEIE	MAL5P1.50;PFE0245c
PF3D7_0914900		BSD-domain protein, putative	No	0.632757	1.57317	2.20593	1.66084	1.4855	2.15638	2.25548	PF3D7_0914900	556	S	___2	FLDEIS(1)EANRS(1)ACDLEEPK	6	FQKISEYNTKFLDEISEANRSACDLEEPKSD	PFI0730w
PF3D7_0914900		BSD-domain protein, putative	No	0.632757	1.57317	2.20593	1.66084	1.4855	2.15638	2.25548	PF3D7_0914900	561	S	___2	FLDEIS(1)EANRS(1)ACDLEEPK	11	EYNTKFLDEISEANRSACDLEEPKSDFFDSS	PFI0730w
PF3D7_0905400	RhopH3	high molecular weight rhoptry protein 3	Yes	0.630337	0.374098	1.00443	0.344881	0.403315	0.93742	1.07145	PF3D7_0905400	736	S	___1	QDVLYETDKPQT(0.005)MDEAS(0.746)Y(0.223)EET(0.025)VDEDAHHVNEK	17	DVLYETDKPQTMDEASYEETVDEDAHHVNEK	PFI0265c
PF3D7_1416600		conserved Plasmodium protein, unknown function	No	0.629848	-1.32937	-0.69952	-1.29328	-1.36546	-0.66835	-0.73069	PF3D7_1416600	2931	S	___1	KFS(0.098)PS(0.902)FGNINNEDIK	5	KSENCINNNIRKFSPSFGNINNEDIKNNNYK	PF14_0165
PF3D7_0702500		Plasmodium exported protein, unknown function	Yes	0.628547	0.174713	0.80326	0.246861	0.102566	0.70286	0.90366	PF3D7_0702500	196	S	___1	NYS(0.001)LGNLS(0.958)T(0.03)GT(0.011)T(0.001)S(0.009)QGS(0.839)T(0.126)S(0.02)S(0.006)R	8	THDLPAGRNYSLGNLSTGTTSQGSTSSRHYS	PF07_0008
PF3D7_0500800	MESA	mature parasite-infected erythrocyte surface antigen	Yes	0.628009	0.766182	1.39419	0.65407	0.878294	1.42167	1.36671	PF3D7_0500800	386	S	___1	LGENVNDGAS(1)ENS(1)EDPKK	13	GEKLGENVNDGASENSEDPKKLTEQEENGTK	MAL5P1.9;PFE0040c
PF3D7_0906600		zinc finger protein, putative	No	0.627773	-0.307447	0.320326	-0.24551	-0.369385	0.361441	0.279211	PF3D7_0906600	588	S	___1	CS(0.001)S(0.073)T(0.073)S(0.849)NLLT(0.004)DINCTNK	5	EETTSGEKFGRCSSTSNLLTDINCTNKQDTT	PFI0325c
PF3D7_1303400	LisH	LisH domain-containing protein, putative	No	0.627743	1.19666	1.8244	1.23412	1.15919	1.79177	1.85703	PF3D7_1303400	864	S	___1	ES(0.117)DS(0.882)VY(0.001)DKEVEK	4	EFGDNICNLHNKESDSVYDKEVEKYGYNHDT	PF13_0018
PF3D7_1313800		conserved Plasmodium membrane protein, unknown function	No	0.627103	-2.38806	-1.76095	-2.30271	-2.47341	-1.60054	-1.92137	PF3D7_1313800	1887	S	___1	KGS(0.628)T(0.186)S(0.186)NINMIGNLSPQTYIK	3	SNEQIVELNSKVRKGSTSNINMIGNLSPQTY	MAL13P1.70
PF3D7_1033200	ETRAMP10.2	early transcribed membrane protein 10.2	Yes	0.626307	-0.537951	0.0883551	-0.547209	-0.528694	0.16733	0.00938034	PF3D7_1033200	193	S	___1	LAS(0.997)FS(0.003)LYDALADASEQNKNK	3	GNDSFKNINEPRKLASFSLYDALADASEQNK	PF10_0323
PF3D7_1357100		elongation factor 1-alpha	No	0.625682	1.61274	2.23842	1.31689	1.90858	2.19187	2.28497	PF3D7_1357100;PF3D7_1357000	385;385	S	___1	SGDS(1)ALVSLEPK	4	GKVVEENPKAIKSGDSALVSLEPKKPMVVET	PF13_0305
PF3D7_1412500	ACT2	actin II	No	0.624823	-0.576082	0.0487404	-0.69735	-0.454815	-0.0447292	0.14221	PF3D7_1412500	234	S	___1	S(0.015)EEHS(0.985)DEIEEIYELPDGNLITVGSER	5	IAMDYDEELKRSEEHSDEIEEIYELPDGNLI	PF14_0124
PF3D7_0113200		Plasmodium exported protein, unknown function	Yes	0.624629	4.40467	5.0293	4.4879	4.32143	5.0705	4.98809	PF3D7_0113200	156	S	___1	REIS(1)LTVK	4	INKTQTNESNNKREISLTVKNQKNQTNKSKN	MAL1P3.08;PFA0630c
PF3D7_1132400		conserved Plasmodium membrane protein, unknown function	No	0.624018	-0.776213	-0.152195	-0.870319	-0.682106	-0.17931	-0.12508	PF3D7_1132400	1139	S	___1	NKS(1)DLYR	3	NNSFEYDDDIHKKNKSDLYRKEKNNVHTFNM	PF11_0333
PF3D7_0810600	DBP1	ATP-dependent RNA helicase DBP1, putative	No	0.623933	-4.80469	-4.18075	-4.77971	-4.82967	-3.90347	-4.45804	PF3D7_0810600	75	S	___1	REMNHMVS(0.07)NS(0.909)NNGS(0.021)R	10	QIRNSKREMNHMVSNSNNGSRNYSVEHVNPN	PF08_0096
PF3D7_0815800	VPS9	vacuolar protein sorting-associated protein 9, putative	No	0.622897	-2.93181	-2.30892	-2.96884	-2.89478	-2.47102	-2.14681	PF3D7_0815800	899	S	___1	NNIT(0.002)LDDGS(0.856)Y(0.142)EEQSCAR	9	LKDDKSKNNITLDDGSYEEQSCARKRSLENI	MAL8P1.82
PF3D7_1127800		conserved Plasmodium protein, unknown function	No	0.621668	1.78595	2.40762	1.88289	1.689	2.34969	2.46554	PF3D7_1127800	359	T	___1	LYVVEQKDEENVT(1)NPDEFVTSER	13	LKKLYVVEQKDEENVTNPDEFVTSERTTDID	PF11_0289
PF3D7_0405400	PRPF8	pre-mRNA-processing-splicing factor 8, putative	No	0.621492	1.39011	2.0116	1.43857	1.34164	2.0427	1.9805	PF3D7_0405400	888	S	___1	NKS(1)DDDDNYKGDDNNDNNNK	3	NPYNDDNYKGDDKNKSDDDDNYKGDDNNDNN	MAL4P1.52;PFD0260w;PFD0265w
PF3D7_1416100	SEY1	protein SEY1, putative	No	0.621102	0.331358	0.95246	0.18453	0.478186	0.959251	0.945669	PF3D7_1416100	659	S	___1	NDDANLSKDENYNNKFS(0.82)FS(0.175)LT(0.005)NEK	17	DDANLSKDENYNNKFSFSLTNEKGIFQNINN	PF14_0159
PF3D7_0932200	PFN	profilin	No	0.619068	-5.06754	-4.44847	-5.23887	-4.8962	-4.60777	-4.28917	PF3D7_0932200	6	S	___1	AEEY(0.026)S(0.966)WDS(0.008)YLNDR	5	__________MAEEYSWDSYLNDRLLATNQV	PFI1565w
PF3D7_1140700		conserved Plasmodium protein, unknown function	No	0.617892	-0.822777	-0.204885	-0.793329	-0.852224	-0.16012	-0.249649	PF3D7_1140700	1109	S	___1	LTESEYDS(1)VYETLINR	8	IRKSYINKLTESEYDSVYETLINRYCKNTTN	PF11_0418
PF3D7_1149000	Pf332	antigen 332, DBL-like protein	Yes	0.617553	1.47385	2.0914	1.47623	1.47146	2.03207	2.15073	PF3D7_1149000	275	S	___1	NSNNLKDLDS(0.965)NS(0.035)DKDGIVSESYK	10	EGAGNKNSNNLKDLDSNSDKDGIVSESYKAT	PF11_0506;PF11_0507
PF3D7_0202600.2-p1		conserved Plasmodium protein, unknown function		0.616282	-2.04134	-1.42505	-2.02234	-2.06034	-1.50801	-1.3421	PF3D7_0202600.2-p1;PF3D7_0202600	514;514	S	___1	NVDEIIDS(1)GVEGNCDVEEK	8	FFWDDKNKNVDEIIDSGVEGNCDVEEKLDKE
PF3D7_1436300	PTEX150	translocon component PTEX150	No	0.616106	0.913609	1.52971	0.899801	0.927416	1.50342	1.55601	PF3D7_1436300	549	S	___1	MS(0.002)VS(0.98)T(0.018)HNKK	4	SSSQFDNNKKNKMSVSTHNKKSKNLMDSLDL	PF14_0344;Pf112
PF3D7_1307800		fork head domain protein, putative	No	0.615627	0.0113478	0.626975	0.154341	-0.131645	0.70985	0.5441	PF3D7_1307800	253	S	___3	T(0.447)S(0.553)KDNS(0.996)Y(0.003)YDSK	6	ILKKSSEHTRTSKDNSYYDSKRKYRNITSED	PF13_0042
PF3D7_0516400	PhLP1	phosducin-like protein, putative	No	0.614918	-3.55071	-2.93579	-3.28256	-3.81886	-2.93525	-2.93633	PF3D7_0516400	270	Y	___1	DNNS(0.093)DNY(0.907)DDEDELNKK	7	CHNNMYNSKDNNSDNYDDEDELNKKNIRTQK	MAL5P1.164;PFE0820c
PF3D7_1468700	eIF4A	eukaryotic initiation factor 4A	No	0.614412	-2.92074	-2.30633	-2.90008	-2.94141	-2.47038	-2.14228	PF3D7_1468700	47	S	___1	GIYS(0.077)YGFEKPS(0.923)AIQQR	11	EKLLRGIYSYGFEKPSAIQQRGIKPILNGYD	PF14_0655
PF3D7_1136500.2-p1		casein kinase 1		0.614287	1.19693	1.81122	0.691961	1.7019	2.27248	1.34996	PF3D7_1136500.2-p1;PF3D7_1136500	17;17	S	___1	KLGS(0.98)GS(0.02)FGDIYVAK	4	EIRVANKYALGKKLGSGSFGDIYVAKDIVTM
PF3D7_1415400		conserved Plasmodium protein, unknown function	No	0.613927	2.60391	3.21784	2.75685	2.45098	3.1772	3.25848	PF3D7_1415400	682	S	___1	EYNNIYDEEDNKS(1)DKYR	13	YKKEYNNIYDEEDNKSDKYRNDRDVRDRRKG	PF14_0152
PF3D7_0401800	PfD80	Plasmodium exported protein (PHISTb), unknown function	Yes	0.612943	0.287012	0.899955	0.24761	0.326414	0.92095	0.87896	PF3D7_0401800	133	S	___2	S(1)AS(1)AASTTR	1	TASTASTASAASTTRSASAASTTRSASAAST	MAL4P1.16;PFD0080c
PF3D7_1342900	ApiAP2	AP2 domain transcription factor, putative	No	0.612782	0.245703	0.858485	0.36842	0.122986	0.773071	0.943899	PF3D7_1342900	1831	S	___1	DFVGEYIS(1)DREER	8	KYTSMDNKDFVGEYISDREERYYDINILNDE	PF13_0235
PF3D7_0219600	RFC1	replication factor C subunit 1, putative	No	0.612747	0.120793	0.733541	0.252121	-0.0105343	0.68317	0.783911	PF3D7_0219600	14	S	___1	NLFS(1)DDES(1)DDGRKK	8	__MSSKDKNLFSDDESDDGRKKKRLKKVSSS	PF02_0183;PFB0895c
PF3D7_1205800	HMGB3	high mobility group protein B3, putative	No	0.610538	-0.631662	-0.0211248	-0.470299	-0.793026	0.0797997	-0.122049	PF3D7_1205800	1877	T	___1	ENQHIYYDT(1)DLDKPER	9	FSQTIGKENQHIYYDTDLDKPERTLQDTEIV	2277.t00059;MAL12P1.58;PFL0290w
PF3D7_0202000	KAHRP	knob-associated histidine-rich protein	Yes	0.610282	-1.83164	-1.22136	-1.71606	-1.94722	-0.96175	-1.48096	PF3D7_0202000	485	T	___1	KENET(0.001)KNT(0.999)AGENK	8	DGSKAHEKKENETKNTAGENKKVDSTSADNK	PF02_0020;PFB0100c
PF3D7_1021500	ROK1	ATP-dependent RNA helicase ROK1, putative	No	0.609622	-4.9158	-4.30617	-4.69392	-5.13768	-3.81622	-4.79613	PF3D7_1021500	98	S	___1	NIVPIRS(1)FHDIIEYLK	7	NVEYENINRNIVPIRSFHDIIEYLKIINNER	PF10_0209
PF3D7_0716000		RNA-binding protein, putative	No	0.609017	-1.86793	-1.25891	-1.86202	-1.87384	-1.31026	-1.20757	PF3D7_0716000	113	S	___1	NNDNDDQDDEHNS(0.999)KY(0.001)NDCK	13	DNKNNDNDDQDDEHNSKYNDCKRKHKSNSKI	PF07_0066
PF3D7_1442400	KIC9	conserved Plasmodium protein, unknown function	No	0.608487	1.73879	2.34727	1.78775	1.68983	2.26358	2.43097	PF3D7_1442400	325	S	___1	MYNLDFEEEKS(0.981)ES(0.019)NNLLLNYPHEEK	11	ELENRMYNLDFEEEKSESNNLLLNYPHEEKE	PF14_0402
PF3D7_0702500		Plasmodium exported protein, unknown function	Yes	0.608478	1.73895	2.34743	1.74003	1.73787	2.28675	2.4081	PF3D7_0702500	151	S	___1	NNSDGST(0.001)ENHLS(0.972)GS(0.011)NS(0.016)DGR	12	QLYKNNSDGSTENHLSGSNSDGRNSSQHSVG	PF07_0008
PF3D7_0500800	MESA	mature parasite-infected erythrocyte surface antigen	Yes	0.608427	2.66832	3.27675	2.54634	2.7903	3.05147	3.50203	PF3D7_0500800	383	S	___2	LGENVNDGAS(1)ENS(1)EDPKK	10	ENEGEKLGENVNDGASENSEDPKKLTEQEEN	MAL5P1.9;PFE0040c
PF3D7_0500800	MESA	mature parasite-infected erythrocyte surface antigen	Yes	0.608427	2.66832	3.27675	2.54634	2.7903	3.05147	3.50203	PF3D7_0500800	386	S	___2	LGENVNDGAS(1)ENS(1)EDPKK	13	GEKLGENVNDGASENSEDPKKLTEQEENGTK	MAL5P1.9;PFE0040c
PF3D7_0301600	GEXP21	Plasmodium exported protein (hyp1), unknown function	Yes	0.607613	-1.72301	-1.1154	-1.68918	-1.75685	-1.0004	-1.2304	PF3D7_0301600	606	S	___1	S(0.998)Y(0.002)ENEFNLSTDRR	1	PFKESKISTSSHSTRSYENEFNLSTDRRNSE	MAL3P8.14;PFC0080c
PF3D7_0424500	FIKK4.1	serine/threonine protein kinase, FIKK family	Yes	0.607237	4.40956	5.0168	4.41114	4.40799	4.99692	5.03668	PF3D7_0424500	523	S	___1	LKINDPYDYLKS(0.999)IT(0.001)NQEER	12	IHEKLKINDPYDYLKSITNQEERKSFYFNVS	MAL4P1.228;PFD1165w
PF3D7_0710600	RPL34	60S ribosomal protein L34	No	0.606928	-1.22885	-0.621924	-1.10796	-1.34974	-0.722559	-0.52129	PF3D7_0710600	79	S	___1	AYGGS(1)ICAR	5	RARRKNRTVARAYGGSICARCIRERIMRAFL	PF07_0043
PF3D7_0702500		Plasmodium exported protein, unknown function	Yes	0.606112	-0.725482	-0.11937	-0.795469	-0.655495	-0.141809	-0.0969296	PF3D7_0702500	145	S	___2	NNS(1)DGS(0.961)T(0.039)ENHLSGSNSDGR	6	DGQKESQLYKNNSDGSTENHLSGSNSDGRNS	PF07_0008
PF3D7_0916700	HoMu	RNA-binding protein musashi, putative	No	0.605323	0.605533	1.21086	0.730431	0.480635	1.20128	1.22043	PF3D7_0916700	18	S	___1	TSEENINYNS(0.001)NNS(0.999)NENS(1)VQDK	17	SEENINYNSNNSNENSVQDKKSVEEHNIDDK	PFI0820c
PF3D7_1149000	Pf332	antigen 332, DBL-like protein	Yes	0.605313	-1.32883	-0.723515	-1.34351	-1.31415	-0.946699	-0.50033	PF3D7_1149000	437	S	___1	IS(1)IETSEIDRDKEPFR	2	IKPTYEENDEDKSKISIETSEIDRDKEPFRI	PF11_0506;PF11_0507
PF3D7_1351400		60S ribosomal protein L17, putative	No	0.604858	-2.29653	-1.69167	-2.29105	-2.30202	-1.81809	-1.56526	PF3D7_1351400	160	S	___2	KS(1)LLS(1)NAEK	2	HIQIIAREINKPAKKSLLSNAEKQKKLPFKV	PF13_0268
PF3D7_1351400		60S ribosomal protein L17, putative	No	0.604858	-2.29653	-1.69167	-2.29105	-2.30202	-1.81809	-1.56526	PF3D7_1351400	163	S	___2	KS(1)LLS(1)NAEK	5	IIAREINKPAKKSLLSNAEKQKKLPFKVTLK	PF13_0268
PF3D7_0617200		conserved Plasmodium protein, unknown function	No	0.602842	0.162152	0.764995	0.22497	0.0993347	0.71122	0.818769	PF3D7_0617200	79	S	___1	S(1)ILDDIEKK	1	DCFQSDIDKLENERRSILDDIEKKQKHKKEL	2270.t00061;MAL6P1.254;PFF0835w
PF3D7_1149000	Pf332	antigen 332, DBL-like protein	Yes	0.602363	-0.168217	0.434146	-0.105999	-0.230434	0.399761	0.468531	PF3D7_1149000	1449	S	___1	ASVNDEKVEVAS(0.999)IT(0.001)EEVEEEEK	12	VAQRASVNDEKVEVASITEEVEEEEKSVSEE	PF11_0506;PF11_0507
PF3D7_1303400	LisH	LisH domain-containing protein, putative	No	0.602178	-1.39458	-0.792405	-1.28517	-1.504	-0.66213	-0.92268	PF3D7_1303400	706	S	___1	EHSHSISYISS(0.002)LENS(0.998)PDKLK	15	KEHSHSISYISSLENSPDKLKGQKQNDTNEV	PF13_0018
PF3D7_0623100	NAB2	nuclear polyadenylated RNA-binding protein NAB2, putative	No	0.602048	2.27612	2.87817	2.38698	2.16525	2.94433	2.812	PF3D7_0623100	203	S	___1	GKDS(1)DMFR	4	DKNKSRNKRSDRGKDSDMFRLRDKYRRLGKS	2270.t00119;MAL6P1.198;PFF1110c
PF3D7_1120100	PGM1	phosphoglycerate mutase, putative	No	0.600798	-2.65225	-2.05145	-2.65475	-2.64974	-2.04554	-2.05736	PF3D7_1120100	23	T	___1	FT(0.792)GWT(0.197)DVPLS(0.011)EKGEEEAIAAGK	2	LLRHGESTWNKENKFTGWTDVPLSEKGEEEA	PF11_0208
PF3D7_1002400.2-p1		RNA-binding protein, putative		0.600783	1.77558	2.37637	1.76658	1.78458	2.26899	2.48374	PF3D7_1002400.2-p1;PF3D7_1002400	8;8	S	___1	EAHS(1)ES(1)EEPVHK	4	________MSSKEAHSESEEPVHKNDGSTLY
PF3D7_0905800		conserved Plasmodium protein, unknown function	No	0.600358	-0.961567	-0.361209	-0.845909	-1.07722	-0.477749	-0.244669	PF3D7_0905800	152	S	___2	LNSILPQDNS(1)DDNK	10	NNNNNKLNSILPQDNSDDNKSINICEDGNIN	PFI0285w
PF3D7_0905800		conserved Plasmodium protein, unknown function	No	0.600358	-0.961567	-0.361209	-0.845909	-1.07722	-0.477749	-0.244669	PF3D7_0905800	157	S	___2	LNS(0.009)ILPQDNS(0.995)DDNKS(0.995)INICEDGNINNENKK	15	KLNSILPQDNSDDNKSINICEDGNINNENKK	PFI0285w
PF3D7_0801800		mannose-6-phosphate isomerase, putative	No	0.600142	-0.864388	-0.264245	-0.6961	-1.03267	-0.27379	-0.2547	PF3D7_0801800	196	S	___2	KFS(0.642)T(0.784)KS(0.574)EDIINK	3	KVENTKNKYMNKKKFSTKSEDIINKNNNTTK	MAL8P1.156
PF3D7_0801800		mannose-6-phosphate isomerase, putative	No	0.600142	-0.864388	-0.264245	-0.6961	-1.03267	-0.27379	-0.2547	PF3D7_0801800	199	S	___2	S(1)EDIINK	1	NTKNKYMNKKKFSTKSEDIINKNNNTTKGST	MAL8P1.156
PF3D7_0801800		mannose-6-phosphate isomerase, putative	No	0.600142	-0.864388	-0.264245	-0.6961	-1.03267	-0.27379	-0.2547	PF3D7_0801800	197	T	___2	KFS(0.642)T(0.784)KS(0.574)EDIINK	4	VENTKNKYMNKKKFSTKSEDIINKNNNTTKG	MAL8P1.156
PF3D7_0409800		zinc finger protein, putative	No	0.599992	1.8777	2.47769	1.92557	1.82982	2.51046	2.44492	PF3D7_0409800	117	S	___1	S(1)EWHKYNLK	1	NIQIYNYSFFRYHFKSEWHKYNLKRKLLNLH	MAL4P2.34;PFD0485w
PF3D7_0106100		V-type proton ATPase subunit C, putative	No	0.599652	-0.963417	-0.363765	-1.13355	-0.793285	-0.14814	-0.57939	PF3D7_0106100	262	S	___1	S(1)FKYDEK	1	EDFKKEAKVKKFVVKSFKYDEKQYNDMMESR	MAL1P1.52;PFA0300c
PF3D7_0818000	SNRNP27	conserved protein, unknown function	No	0.598828	1.72873	2.32756	1.82362	1.63383	2.35204	2.30307	PF3D7_0818000	316	S	___1	NNDILNDNILNEELS(1)EGEMIKR	15	KNNDILNDNILNEELSEGEMIKRIMGISEFS	MAL8P1.71
PF3D7_1027300	nPrx	peroxiredoxin	No	0.598759	1.04262	1.64138	0.79439	1.29084	1.71506	1.56769	PF3D7_1027300	143	S	___1	KS(0.001)VS(0.999)PGK	4	VLKNDFTVSYVKKSVSPGKSATQVLNFLVNG	PF10_0268
PF3D7_1129500		A/G-specific adenine glycosylase, putative	No	0.597473	-3.99855	-3.40108	-3.70948	-4.28763	-3.26566	-3.5365	PF3D7_1129500	125	S	___1	EHNELS(1)LER	6	KGTKIMKIKKEHNELSLERCKRLKKEDKDEE	PF11_0306
PF3D7_0708400	HSP90	heat shock protein 90	No	0.597423	2.66189	3.25932	2.6839	2.63988	3.23648	3.28215	PF3D7_0708400	220	S	___1	QNEKEIT(1)AS(1)EEEEGEGEGEREGEEEEEK	9	IKLYCERQNEKEITASEEEEGEGEGEREGEE	PF07_0029
PF3D7_1473700	NUP116	nucleoporin NUP116/NSP116, putative	No	0.597353	1.53198	2.12933	1.59045	1.47351	2.16952	2.08914	PF3D7_1473700	6	S	___1	LS(1)NVITSNK	2	__________MSRKLSNVITSNKGNSMELFV	PF14_0706
PF3D7_0912600		conserved Plasmodium protein, unknown function	No	0.595782	-1.97091	-1.37513	-1.90025	-2.04157	-1.2768	-1.47346	PF3D7_0912600	667	S	___1	S(0.103)KS(0.859)DS(0.038)LLDFLK	3	KEKDEIFQKCLLRSKSDSLLDFLKMSKLKKT	PFI0615w
PF3D7_1409900	CDS	cytidine diphosphate-diacylglycerol synthase	No	0.595563	-1.86632	-1.27075	-1.809	-1.92364	-1.23284	-1.30867	PF3D7_1409900	60	S	___1	S(0.002)LDDS(0.998)NGGIENMDK	5	GDIIKRRSKSKSLDDSNGGIENMDKVKVSNN	PF14_0097
PF3D7_1336800	NUDC	nuclear movement protein, putative	No	0.595428	0.0444031	0.639831	0.0253716	0.0634346	0.543751	0.73591	PF3D7_1336800	326	S	___1	MEDLDAET(0.038)RS(0.962)VVEK	10	VPENSRMEDLDAETRSVVEKMIYDQKQKAMN	PF13_0204
PF3D7_1416600		conserved Plasmodium protein, unknown function	No	0.595212	-2.94524	-2.35003	-2.96236	-2.92811	-2.3605	-2.33955	PF3D7_1416600	731	S	___1	IVT(0.002)HEFGS(0.998)DKEK	8	NKFIDKNKIVTHEFGSDKEKYIEQNEPSIYN	PF14_0165
PF3D7_0113200		Plasmodium exported protein, unknown function	Yes	0.595058	-0.436937	0.158121	-0.42436	-0.449514	0.156921	0.159321	PF3D7_0113200	367	Y	___1	SENENDDES(0.283)DY(0.717)DDDEELQGHSVVYNDK	11	NNQHRSENENDDESDYDDDEELQGHSVVYND	MAL1P3.08;PFA0630c
PF3D7_0629400	PABP3	RNA-binding protein, putative	No	0.594792	-2.65052	-2.05573	-2.6226	-2.67844	-1.96653	-2.14493	PF3D7_0629400	627	S	___1	MNDCT(0.002)YMS(0.96)DMS(0.031)T(0.007)IYSENNR	8	DESILNCKMNDCTYMSDMSTIYSENNRNNMN	2270.t00182;MAL6P1.134;PFF1425w
PF3D7_1347500	ALBA4	DNA/RNA-binding protein Alba 4	No	0.594648	-0.481647	0.113001	-0.48205	-0.481245	0.154011	0.071991	PF3D7_1347500	114	S	___1	IS(1)PGYVSFHEK	2	KIYMEKHPEFKGSRISPGYVSFHEKTDSFTP	MAL13P1.237
PF3D7_1027300	nPrx	peroxiredoxin	No	0.592323	-0.502282	0.0900412	-0.536699	-0.467865	0.0259914	0.154091	PF3D7_1027300	205	T	___1	T(0.712)ADT(0.288)DKEKPK	1	VQGEGEGEGEGDEEKTADTDKEKPKKSSTST	PF10_0268
PF3D7_0916700	HoMu	RNA-binding protein musashi, putative	No	0.592298	1.08056	1.67286	1.12075	1.04037	1.61704	1.72868	PF3D7_0916700	24	S	___2	S(1)VEEHNIDDKS(1)LRDEDNK	1	YNSNNSNENSVQDKKSVEEHNIDDKSLRDED	PFI0820c
PF3D7_0916700	HoMu	RNA-binding protein musashi, putative	No	0.592298	1.08056	1.67286	1.12075	1.04037	1.61704	1.72868	PF3D7_0916700	34	S	___2	SVEEHNIDDKS(1)LRDEDNK	11	VQDKKSVEEHNIDDKSLRDEDNKSIKEGNNN	PFI0820c
PF3D7_1362700		conserved Plasmodium protein, unknown function	No	0.592153	-1.0363	-0.444144	-0.926119	-1.14647	-0.487259	-0.40103	PF3D7_1362700	309	S	___1	ETEYGQNKDVHVFEES(0.952)VRDY(0.001)T(0.048)NNYIK	16	ETEYGQNKDVHVFEESVRDYTNNYIKERKKY	MAL13P1.313;PF13_0332
PF3D7_1354300		large subunit rRNA methyltransferase, putative	No	0.591938	-2.28522	-1.69328	-2.50544	-2.065	-1.67863	-1.70794	PF3D7_1354300	247	S	___1	QESYLDNNENYFS(1)DEESNDEEKVGEK	13	ETKQESYLDNNENYFSDEESNDEEKVGEKID	PF13_0286
PF3D7_0406500		NYN domain-containing protein, putative	No	0.590963	1.07323	1.66419	1.13987	1.00658	1.62498	1.7034	PF3D7_0406500	2618	S	___1	NVEMDDKEELITNEQS(0.999)NNES(0.001)SPNK	16	NVEMDDKEELITNEQSNNESSPNKKKNKKKN	MAL4P1.63;PFD0320c
PF3D7_1036900		conserved Plasmodium protein, unknown function	No	0.590192	2.99125	3.58144	3.02225	2.96025	3.51036	3.65252	PF3D7_1036900	541	T	___1	LNYDMT(0.098)T(0.902)IT(1)EETNEFDHDVNKK	9	DPYTGQKLNYDMTTITEETNEFDHDVNKKVI	PF10_0361
PF3D7_0807800	RPN10	26S proteasome regulatory subunit RPN10, putative	No	0.588778	-0.432133	0.156645	-0.32468	-0.539585	0.2605	0.0527897	PF3D7_0807800	474	S	___1	EGDS(1)DKEK	4	KINPNVNVFDKKEGDSDKEKNKE________	PF08_0109
PF3D7_0402100		Plasmodium exported protein (PHISTb), unknown function	Yes	0.588727	-0.980477	-0.39175	-0.999439	-0.961515	-0.55295	-0.230551	PF3D7_0402100	121	S	___2	QHDENNFS(0.944)DKS(0.528)GS(0.528)MVLNEK	8	KTLFNNVRQHDENNFSDKSGSMVLNEKDIQL	MAL4P1.19;PFD0095c
PF3D7_0402100		Plasmodium exported protein (PHISTb), unknown function	Yes	0.588727	-0.980477	-0.39175	-0.999439	-0.961515	-0.55295	-0.230551	PF3D7_0402100	124	S	___2	QHDENNFS(0.008)DKS(0.952)GS(0.039)MVLNEK	11	FNNVRQHDENNFSDKSGSMVLNEKDIQLEKK	MAL4P1.19;PFD0095c
PF3D7_0402100		Plasmodium exported protein (PHISTb), unknown function	Yes	0.588727	-0.980477	-0.39175	-0.999439	-0.961515	-0.55295	-0.230551	PF3D7_0402100	126	S	___2	S(0.002)GS(0.998)MVLNEK	3	NVRQHDENNFSDKSGSMVLNEKDIQLEKKIE	MAL4P1.19;PFD0095c
PF3D7_1335400	RH2a	reticulocyte binding protein 2 homologue a	No	0.588168	1.8784	2.46657	1.86414	1.89266	2.58035	2.35279	PF3D7_1335400;PF3D7_1335300	1254;1254	S	___1	KS(1)DTIK	2	LIDDICEQITNEAKKSDTIKEKIESYKKDID	PF13_0198
PF3D7_0808300		ubiquitin regulatory protein, putative	No	0.587623	5.10488	5.6925	5.18766	5.02209	5.6919	5.6931	PF3D7_0808300	8	S	___1	S(0.001)LS(0.999)DLKK	3	________MSNIRSLSDLKKDDKKNNERVAH	MAL8P1.122
PF3D7_1334300	MSRP5	MSP7-like protein	Yes	0.587583	3.11058	3.69816	3.19543	3.02572	3.64956	3.74676	PF3D7_1334300	303	S	___1	S(0.003)NS(0.968)T(0.029)SNQLITQLQSEK	3	GNTPTKLSTQNTKSNSTSNQLITQLQSEKSS	PF13_0191
PF3D7_1334700	MSRP7	MSP7-like protein	Yes	0.587553	0.225567	0.81312	0.16029	0.290844	0.77932	0.84692	PF3D7_1334700	179	T	___1	GT(0.5)S(0.5)QNDSDYLHSVYDK	2	ALCGHTKDNHNNLRGTSQNDSDYLHSVYDKA	PF13_0194
PF3D7_1307800		fork head domain protein, putative	No	0.587302	-0.336367	0.250936	-0.226559	-0.446175	0.31912	0.182751	PF3D7_1307800	246	T	___3	S(0.235)S(0.262)EHT(0.512)RT(0.495)S(0.495)KDNS(0.991)Y(0.008)Y(0.002)DSK	5	KQMDKIYILKKSSEHTRTSKDNSYYDSKRKY	PF13_0042
PF3D7_1340200		conserved Plasmodium protein, unknown function	No	0.587078	1.01249	1.59957	1.24918	0.775795	1.81869	1.38044	PF3D7_1340200	56	S	___1	KELGEYHKY(0.008)Y(0.075)S(0.917)DN	11	YRDVKKELGEYHKYYSDN_____________	PF13_0218a
PF3D7_1407100	NOP1	rRNA 2'-O-methyltransferase fibrillarin, putative	No	0.586839	-0.888118	-0.301279	-0.85446	-0.921776	-0.341839	-0.260719	PF3D7_1407100	131	T	___1	RYEVMT(1)EDEKIEYR	6	VPGESVYGEKRYEVMTEDEKIEYRVWNPFRS	PF14_0068
PF3D7_0729100		conserved Plasmodium protein, unknown function	No	0.586762	0.381078	0.96784	0.482351	0.279804	1.00028	0.9354	PF3D7_0729100	1073	S	___2	IQNMEEHEYIPCAS(0.884)NKS(0.895)IS(0.101)NNY(0.121)HVLSK	14	ERIQNMEEHEYIPCASNKSISNNYHVLSKSE	PF07_0120
PF3D7_0729100		conserved Plasmodium protein, unknown function	No	0.586762	0.381078	0.96784	0.482351	0.279804	1.00028	0.9354	PF3D7_0729100	1076	S	___2	IQNMEEHEYIPCAS(0.884)NKS(0.895)IS(0.101)NNY(0.121)HVLSK	17	QNMEEHEYIPCASNKSISNNYHVLSKSEYDK	PF07_0120
PF3D7_0711500		regulator of chromosome condensation, putative	No	0.586613	-0.959392	-0.372779	-0.960999	-0.957785	-0.365269	-0.380289	PF3D7_0711500	667	S	___1	VKS(0.99)VGS(0.01)R	3	NLKEAQSPSGKRKVKSVGSRRESLSAPISKK	MAL7P1.38
PF3D7_1438400	MCA2	metacaspase-like protein	No	0.586438	1.68553	2.27197	1.71556	1.65549	2.20435	2.33958	PF3D7_1438400	499	S	___1	LQVIEDKEKNS(1)NR	11	KKKQKLQVIEDKEKNSNRAVVMPLKNKIIYI	PF14_0362;PF14_0363
PF3D7_1342000		40S ribosomal protein S6	No	0.586133	-1.40288	-0.816745	-1.4333	-1.37246	-0.94577	-0.687719	PF3D7_1342000	150	S	___1	LFNLDKS(1)DDVRK	7	PKRASKIRKLFNLDKSDDVRKYVIGRAITKN	PF13_0228
PF3D7_1349200		glutamate--tRNA ligase, putative	No	0.585993	-1.65252	-1.06652	-1.65427	-1.65076	-1.29486	-0.83819	PF3D7_1349200	428	S	___1	NNS(1)IEKNLELFNEMR	3	RNQRGEGIESINRNNSIEKNLELFNEMRKGT	PF13_0257
PF3D7_0202000	KAHRP	knob-associated histidine-rich protein	Yes	0.585742	6.88453	7.47027	6.90331	6.86575	7.44496	7.49558	PF3D7_0202000	403	S	___1	KHKDNEDAES(1)VK	10	EKKKSKKHKDNEDAESVKSKKHKSHDCEKKK	PF02_0020;PFB0100c
PF3D7_1033200	ETRAMP10.2	early transcribed membrane protein 10.2	Yes	0.585397	4.11329	4.69868	4.2366	3.98997	4.79682	4.60055	PF3D7_1033200	255	S	___1	NS(0.001)S(0.999)EDKPTSESK	3	DMDPLNPYGSSKRNSSEDKPTSESKGTTPES	PF10_0323
PF3D7_0401800	PfD80	Plasmodium exported protein (PHISTb), unknown function	Yes	0.585103	-1.35127	-0.76617	-1.29669	-1.40586	-0.88884	-0.643499	PF3D7_0401800	375	T	___1	T(0.922)FS(0.078)KELSK	1	YDEHEAKKHASDRTKTFSKELSKLFKKLRTK	MAL4P1.16;PFD0080c
PF3D7_1115800		conserved Plasmodium protein, unknown function	No	0.585082	-2.75599	-2.17091	-2.91534	-2.59663	-2.23659	-2.10522	PF3D7_1115800	165	S	___2	T(0.123)T(0.156)S(0.713)NVS(0.937)T(0.071)NNTTNDHAR	3	NFKKPTGGEATIKTTSNVSTNNTTNDHARKT	PF11_0166
PF3D7_1244100		N-alpha-acetyltransferase 15, NatA auxiliary subunit, putative	No	0.584566	-0.115767	0.4688	0.0122414	-0.243774	0.43425	0.503349	PF3D7_1244100	688	S	___1	NDKVDEEEDDDENIPS(1)ELNDKDLEK	16	NDKVDEEEDDDENIPSELNDKDLEKLIEKNV	2277.t00424;MAL12P1.422;PFL2120w
PF3D7_0730300	ApiAP2	AP2 domain transcription factor AP2-L, putative	No	0.583158	-1.73438	-1.15122	-1.7008	-1.76796	-1.20248	-1.09996	PF3D7_0730300	891	S	___1	CNQDS(0.022)YS(0.808)T(0.17)NEEPLS(0.001)NHSINDPGK	7	NNKNHIENRCNQDSYSTNEEPLSNHSINDPG	PF07_0126
PF3D7_1149100.2-p1		Plasmodium exported protein, unknown function		0.581923	-0.310633	0.271291	-0.25469	-0.366575	0.182051	0.360531	PF3D7_1149100.2-p1;PF3D7_1149100	185;186	S	___1	TETQEESLNKEVVEGCS(0.861)T(0.139)GMCPLKNNDTK	17	ETQEESLNKEVVEGCSTGMCPLKNNDTKKEN
PF3D7_0808300		ubiquitin regulatory protein, putative	No	0.580821	4.7491	5.32992	4.76533	4.73288	5.28101	5.37884	PF3D7_0808300	37	S	___1	SGLEVQNS(1)DDDFVQNLFK	8	AHYTGGQKSGLEVQNSDDDFVQNLFKSKLPE	MAL8P1.122
PF3D7_0401800	PfD80	Plasmodium exported protein (PHISTb), unknown function	Yes	0.580217	5.30359	5.88381	5.40305	5.20412	5.73599	6.03162	PF3D7_0401800	65	S	___2	SSSCSS(1)LASTTK	6	EEKAEDDYKKSSSCSSLASTTKRSPSTASTS	MAL4P1.16;PFD0080c
PF3D7_1110900		ES2 protein, putative	No	0.580127	-0.494226	0.0859003	-0.494719	-0.493734	0.106041	0.0657597	PF3D7_1110900	429	T	___1	NNDNYEYVNT(1)PLIQAGK	10	KFNLLKNNDNYEYVNTPLIQAGKGVDQSPII	PF11_0115
PF3D7_0401800	PfD80	Plasmodium exported protein (PHISTb), unknown function	Yes	0.580028	4.90175	5.48178	4.96892	4.83459	5.33865	5.62491	PF3D7_0401800	68	S	___2	SSSCS(0.034)S(0.966)LAS(0.971)T(0.025)T(0.004)K	9	AEDDYKKSSSCSSLASTTKRSPSTASTSTSL	MAL4P1.16;PFD0080c
PF3D7_0402100		Plasmodium exported protein (PHISTb), unknown function	Yes	0.577478	3.25259	3.83007	3.28109	3.22408	3.77978	3.88035	PF3D7_0402100	94	S	___2	QVPKEES(1)ENS(1)NNDIFEYYK	7	NYGEGSLLKQVPKEESENSNNDIFEYYKTLF	MAL4P1.19;PFD0095c
PF3D7_0402100		Plasmodium exported protein (PHISTb), unknown function	Yes	0.577478	3.25259	3.83007	3.28109	3.22408	3.77978	3.88035	PF3D7_0402100	97	S	___2	QVPKEES(1)ENS(1)NNDIFEYYK	10	EGSLLKQVPKEESENSNNDIFEYYKTLFNNV	MAL4P1.19;PFD0095c
PF3D7_1416600		conserved Plasmodium protein, unknown function	No	0.576428	-1.35748	-0.781054	-1.29982	-1.41515	-0.765949	-0.79616	PF3D7_1416600	2179	S	___1	SYNS(0.999)EDLLY(0.001)K	4	NYKKCSDTIKGKSYNSEDLLYKGNFYKNVRR	PF14_0165
PF3D7_0921600		tetratricopeptide repeat protein, putative	No	0.576408	-2.6007	-2.02429	-2.62586	-2.57553	-1.97957	-2.06901	PF3D7_0921600	1619	S	___1	NIINVEEENS(0.991)S(0.991)FEES(0.018)R	10	PTPSNKNIINVEEENSSFEESRNYESSDNSS	PFI1060w
PF3D7_0202000	KAHRP	knob-associated histidine-rich protein	Yes	0.575832	3.94721	4.52304	3.89736	3.99706	4.48245	4.56363	PF3D7_0202000	603	S	___1	GAS(0.967)T(0.031)T(0.001)AGS(0.998)T(0.001)TGATTGANAVQSK	8	STTEGATKGASTTAGSTTGATTGANAVQSKD	PF02_0020;PFB0100c
PF3D7_1409900	CDS	cytidine diphosphate-diacylglycerol synthase	No	0.575422	-2.55003	-1.9746	-2.54502	-2.55503	-1.91219	-2.03702	PF3D7_1409900	39	S	___2	KS(0.002)T(0.002)ES(0.112)S(0.869)T(0.015)VDEKGDIIK	6	DKVLDDKKRKKSTESSTVDEKGDIIKRRSKS	PF14_0097
PF3D7_1409900	CDS	cytidine diphosphate-diacylglycerol synthase	No	0.575422	-2.55003	-1.9746	-2.54502	-2.55503	-1.91219	-2.03702	PF3D7_1409900	40	T	___2	S(0.044)T(0.044)ES(0.638)S(0.638)T(0.638)VDEKGDIIK	6	KVLDDKKRKKSTESSTVDEKGDIIKRRSKSK	PF14_0097
PF3D7_1026600		conserved Plasmodium protein, unknown function	No	0.574862	1.46122	2.03608	1.55017	1.37226	1.99438	2.07778	PF3D7_1026600	1279	S	___1	S(1)DEEEKINDLK	1	STSIISDGKIDSIHKSDEEEKINDLKEDSNV	PF10_0262
PF3D7_1138700	KIC5	conserved Plasmodium protein, unknown function	No	0.574733	-1.37308	-0.798349	-1.18237	-1.5638	-0.713339	-0.88336	PF3D7_1138700	1591	S	___1	T(0.002)Y(0.001)KLDT(0.236)S(0.761)NVTK	7	HSSMTNKQKTYKLDTSNVTKDISSTDNNNNN	PF11_0398
PF3D7_0619000		conserved protein, unknown function	No	0.574078	-1.03752	-0.463445	-0.922899	-1.15215	-0.563799	-0.363091	PF3D7_0619000;PF3D7_0619000.2-p1	883;884	S	___1	ILS(1)NELK	3	IFGEQINECFLHKILSNELKDPYFYAYFFDA	2270.t00077;MAL6P1.237;PF3D7_0619000.1;PF3D7_0619000.2;PFF0920c
PF3D7_0916400		conserved Plasmodium protein, unknown function	No	0.573858	1.32991	1.90377	1.2717	1.38812	1.9635	1.84404	PF3D7_0916400	1894	S	___1	S(0.975)MFY(0.025)FKNK	1	MNKKEKLFVNSNTKKSMFYFKNKYVSLIYKH	PFI0805w
PF3D7_1426000	RPL21	60S ribosomal protein L21	No	0.573602	-2.64161	-2.06801	-2.79142	-2.49181	-2.24172	-1.8943	PF3D7_1426000	47	S	___1	LNYGDYVDIVCDS(0.5)T(0.5)QQK	13	LEKLNYGDYVDIVCDSTQQKGMPFNYYHGKT	PF14_0240
PF3D7_1426000	RPL21	60S ribosomal protein L21	No	0.573602	-2.64161	-2.06801	-2.79142	-2.49181	-2.24172	-1.8943	PF3D7_1426000	48	T	___1	LNYGDYVDIVCDS(0.5)T(0.5)QQK	14	EKLNYGDYVDIVCDSTQQKGMPFNYYHGKTG	PF14_0240
PF3D7_1149000	Pf332	antigen 332, DBL-like protein	Yes	0.572068	-1.40861	-0.836539	-1.23653	-1.58068	-0.892029	-0.78105	PF3D7_1149000	1491	S	___1	GSSTEVVVEEQGS(0.5)VT(0.5)ENLLEEESASQGIVEK	13	VVKGSSTEVVVEEQGSVTENLLEEESASQGI	PF11_0506;PF11_0507
PF3D7_1149000	Pf332	antigen 332, DBL-like protein	Yes	0.572068	-1.40861	-0.836539	-1.23653	-1.58068	-0.892029	-0.78105	PF3D7_1149000	1493	T	___1	GSSTEVVVEEQGS(0.5)VT(0.5)ENLLEEESASQGIVEK	15	KGSSTEVVVEEQGSVTENLLEEESASQGIVE	PF11_0506;PF11_0507
PF3D7_1343000	PMT	phosphoethanolamine N-methyltransferase	No	0.571282	0.350793	0.922075	0.502451	0.199135	1.05361	0.790541	PF3D7_1343000	12	T	___1	T(0.006)LIENLNS(0.331)DKT(0.63)FLENNQY(0.025)T(0.008)DEGVK	11	____MTLIENLNSDKTFLENNQYTDEGVKVY	MAL13P1.214
PF3D7_1219600	ATPase2	aminophospholipid-transporting P-ATPase	No	0.571017	-0.253907	0.31711	-0.356249	-0.151566	0.32073	0.31349	PF3D7_1219600	621	S	___1	EIS(1)S(1)RVIS(0.966)FKDS(0.034)K	3	SSSLGIISNAPKREISSRVISFKDSKEKNYI	2277.t00190;MAL12P1.190;PFL0950c
PF3D7_1332400		nucleotidyltransferase, putative	No	0.570539	-0.585683	-0.0151443	-0.44433	-0.727036	-0.0772285	0.0469398	PF3D7_1332400	294	S	___1	YS(0.027)KDS(0.973)NNIIIEGSGYNMK	5	KNINETCYSNKYSKDSNNIIIEGSGYNMKKK	MAL13P1.170
PF3D7_0313000		conserved Plasmodium protein, unknown function	No	0.569464	1.9291	2.49856	1.91506	1.94313	2.55359	2.44353	PF3D7_0313000	153	S	___1	LT(0.087)S(0.913)YNECPVDLYR	3	KNVEGEKKNTYKKLTSYNECPVDLYRDNNKT	MAL3P4.29;PFC0545c
PF3D7_1423200	CYP52	peptidyl-prolyl cis-trans isomerase	No	0.568937	-4.16281	-3.59387	-3.98015	-4.34548	-3.68689	-3.50086	PF3D7_1423200	2	S	___1	S(0.923)EVY(0.068)S(0.009)IEPK	1	______________MSEVYSIEPKTHGKVII	2298.t00770;PF14_0223
PF3D7_1212700	EIF3A	eukaryotic translation initiation factor 3 subunit A, putative	No	0.568452	-0.567167	0.0012846	-0.59688	-0.537455	-0.00325012	0.00581932	PF3D7_1212700	1284	T	___1	AKHET(0.959)S(0.04)EENT(0.002)K	5	AWNLKEDDDSKAKHETSEENTKSWRNNNKVI	2277.t00126;MAL12P1.125;PFL0625c
PF3D7_0104800	NPT1	novel putative transporter 1, putative	No	0.567178	0.050313	0.617491	-0.134779	0.235405	0.792391	0.442591	PF3D7_0104800	357	S	___1	DKS(0.197)IDS(0.803)NK	6	KISDQSTVKKDKSIDSNKNILHDEEDFHKKS	MAL1P1.40;PFA0245w
PF3D7_0606000	KIC1	conserved Plasmodium protein, unknown function	No	0.567068	-3.29879	-2.73172	-3.21668	-3.38089	-2.81445	-2.64899	PF3D7_0606000	346	S	___1	KFITFNTFDNHS(1)EGS(1)VIFPMEK	15	KKFITFNTFDNHSEGSVIFPMEKYRNFTLPS	2270.t00255;MAL6P1.63;PFF0295c
PF3D7_0812700	SNRPC	U1 small nuclear ribonucleoprotein C, putative	No	0.565942	1.33156	1.8975	1.36768	1.29543	2.03755	1.75745	PF3D7_0812700	232	S	___1	KPSFLNPENSKEHIES(1)DIS(1)	16	KPSFLNPENSKEHIESDIS____________	PF08_0084
PF3D7_0106300	ATP6	calcium-transporting ATPase	No	0.565866	-1.43216	-0.86629	-1.65208	-1.21223	-0.80537	-0.92721	PF3D7_0106300	492	S	___2	GS(1)KILEDK	2	LKEMKSNENTIISRGSKILEDKINKYCYSEY	MAL1P1.54;PFA0310c
PF3D7_0319600	EF-1delta	elongation factor 1-delta, putative	No	0.565758	-1.83227	-1.26651	-1.89493	-1.76962	-1.29682	-1.23621	PF3D7_0319600	44	S	___1	S(0.5)S(0.5)LIIDIKPYGENTDLDEVLK	1	QANTKKPKKKEVINKSSLIIDIKPYGENTDL	MAL3P7.3;PFC0870w
PF3D7_0319600	EF-1delta	elongation factor 1-delta, putative	No	0.565758	-1.83227	-1.26651	-1.89493	-1.76962	-1.29682	-1.23621	PF3D7_0319600	45	S	___1	S(0.5)S(0.5)LIIDIKPYGENTDLDEVLK	2	ANTKKPKKKEVINKSSLIIDIKPYGENTDLD	MAL3P7.3;PFC0870w
PF3D7_1340900	PiT	sodium-dependent phosphate transporter	No	0.565578	-1.73725	-1.17167	-1.91416	-1.56034	-1.18217	-1.16118	PF3D7_1340900	375	S	___1	DNGS(0.994)EDKS(0.006)HENMLK	4	GSVEAHHVVHIKDNGSEDKSHENMLKKNLDK	MAL13P1.206
PF3D7_0922500	PGK	phosphoglycerate kinase	No	0.565263	-0.870373	-0.30511	-0.87604	-0.864706	-0.28985	-0.32037	PF3D7_0922500	173	S	___1	AHS(0.5)S(0.5)MVGVK	3	DVFINDAFGTAHRAHSSMVGVKLNVKASGFL	PFI1105w
PF3D7_0922500	PGK	phosphoglycerate kinase	No	0.565263	-0.870373	-0.30511	-0.87604	-0.864706	-0.28985	-0.32037	PF3D7_0922500	174	S	___1	AHS(0.5)S(0.5)MVGVK	4	VFINDAFGTAHRAHSSMVGVKLNVKASGFLM	PFI1105w
PF3D7_0113000	GARP	glutamic acid-rich protein	Yes	0.564963	-1.06883	-0.503864	-1.11998	-1.01768	-0.667139	-0.34059	PF3D7_0113000	227	S	___1	EQGGCGIIS(0.382)S(0.618)VHETSNDTK	10	SPYQYREQGGCGIISSVHETSNDTKDNDKEN	MAL1P3.06;PFA0620c
PF3D7_0201800	KAHsp40	knob associated heat shock protein 40	Yes	0.564808	-2.52323	-1.95842	-2.37117	-2.67529	-1.97991	-1.93694	PF3D7_0201800	144	S	___1	SISEAYEVLS(1)DEEKR	10	ADNMFKSISEAYEVLSDEEKRDIYDKYGEEG	PF02_0018;PFB0090c
PF3D7_0532300		Plasmodium exported protein (PHISTb), unknown function	Yes	0.564792	2.90376	3.46855	2.96212	2.84541	3.47349	3.46362	PF3D7_0532300	459	S	___1	LAENQVEKEFQEVNERFS(1)EVAK	18	ENQVEKEFQEVNERFSEVAKRFKLTEKTVNF	MAL5P1.314;PFE1600w
PF3D7_0706500		conserved Plasmodium protein, unknown function	No	0.564692	1.60068	2.16538	1.78506	1.41631	2.11695	2.2138	PF3D7_0706500	728	S	___1	ADDKVLS(1)NEEVEK	7	QNIDMHEPKADDKVLSNEEVEKNIDRDKNVD	MAL7P1.204
PF3D7_1149000	Pf332	antigen 332, DBL-like protein	Yes	0.564532	1.27819	1.84272	1.26772	1.28865	1.8591	1.82634	PF3D7_1149000	142	S	___1	ENGLDVCKS(1)QCEER	9	KDETFSRENGLDVCKSQCEERSRDDTEDQFL	PF11_0506;PF11_0507
PF3D7_0210900		conserved Plasmodium protein, unknown function	No	0.564377	-0.632262	-0.0678854	-0.494719	-0.769806	-0.0268803	-0.108891	PF3D7_0210900	13	S	___1	IMDYLS(1)CPLDDVVDREK	6	___MKEKNEKIMDYLSCPLDDVVDREKKSGK	PF02_0102;PFB0490c
PF3D7_0218500	SNRPD2	small nuclear ribonucleoprotein Sm D2, putative	No	0.564282	-1.15422	-0.589934	-1.18123	-1.1272	-0.543869	-0.636	PF3D7_0218500	3	S	___1	MKS(1)EVT(1)IEENRDNPEDGPLGLLSECVK	3	_____________MKSEVTIEENRDNPEDGP	PF02_0175;PFB0865w
PF3D7_1120100	PGM1	phosphoglycerate mutase, putative	No	0.564168	-0.595468	-0.0312996	-0.457729	-0.733206	0.0571499	-0.119749	PF3D7_1120100	92	Y	___1	HY(1)GSLQGLNK	2	LHVPVVKTWRLNERHYGSLQGLNKSETAKKY	PF11_0208
PF3D7_1149000	Pf332	antigen 332, DBL-like protein	Yes	0.563972	-1.18972	-0.625745	-1.11647	-1.26296	-0.57151	-0.679979	PF3D7_1149000	803	S	___1	NVS(1)EEIPVEEK	3	EKSVSEEIPVEEKNVSEEIPVEEKNVSEEIP	PF11_0506;PF11_0507
PF3D7_1462400		conserved Plasmodium protein, unknown function	No	0.563797	0.367418	0.931215	0.509981	0.224855	0.95208	0.910351	PF3D7_1462400	2928	S	___1	NT(0.026)LS(0.947)S(0.026)IEDEEKFEEREPK	4	EGNKMKECSDLKNTLSSIEDEEKFEEREPKR	PF14_0594
PF3D7_0221200		Plasmodium exported protein (hyp15), unknown function	Yes	0.563684	0.973002	1.53669	0.950001	0.996004	1.51719	1.55618	PF3D7_0221200	70	T	___1	NET(1)ILNDKLRK	3	EFMKHTLTNSSLRNETILNDKLRKRNDGINN	PF02_0198;PFB0953w
PF3D7_1346300	ALBA2	DNA/RNA-binding protein Alba 2	No	0.563523	2.04504	2.60857	2.30682	1.78326	2.74314	2.47399	PF3D7_1346300	4	S	___1	PGS(1)T(1)KS(0.996)DT(0.004)KLENEIR	3	____________MPGSTKSDTKLENEIRISY	MAL13P1.233
PF3D7_0729100		conserved Plasmodium protein, unknown function	No	0.563377	-1.3243	-0.76092	-1.30124	-1.34735	-0.771959	-0.74988	PF3D7_0729100	1078	S	___2	S(0.5)IS(0.5)NNY(0.001)HVLSK	3	MEEHEYIPCASNKSISNNYHVLSKSEYDKSS	PF07_0120
PF3D7_1421100		conserved Plasmodium protein, unknown function	No	0.563027	-1.81575	-1.25272	-1.7644	-1.86711	-1.26193	-1.24352	PF3D7_1421100	1012	S	___1	DNHS(1)DHNNNNNDNYCK	4	NNNDNNNDNYCKDNHSDHNNNNNDNYCKDNH	PF14_0204
PF3D7_1140700		conserved Plasmodium protein, unknown function	No	0.562142	0.419394	0.981536	0.498281	0.340506	0.916971	1.0461	PF3D7_1140700	84	S	___1	NY(0.002)DS(0.988)DENT(0.01)WEPFENLSPNLK	4	NLDDFEFYIKWKNYDSDENTWEPFENLSPNL	PF11_0418
PF3D7_1107800	ApiAP2	AP2 domain transcription factor, putative	No	0.561948	1.67837	2.24032	1.70305	1.65369	2.1499	2.33074	PF3D7_1107800	270	S	___1	LNENNNLYLNCLS(0.011)DS(0.989)YDENNVIK	15	KLNENNNLYLNCLSDSYDENNVIKKKDATSG	PF11_0091
PF3D7_0607000		translation initiation factor IF-2, putative	No	0.561447	-0.283812	0.277636	-0.134909	-0.432714	0.21368	0.341591	PF3D7_0607000	296	S	___1	LNEEDELQGS(1)QKVDEK	10	SNSSLKLNEEDELQGSQKVDEKDIVLDNWED	2270.t00246;MAL6P1.73;PFF0345w
PF3D7_0215300	ACS8	acyl-CoA synthetase	Yes	0.560098	0.0396976	0.599795	0.106501	-0.0271053	0.599861	0.59973	PF3D7_0215300	856	T	___1	NTLKS(0.355)T(0.645)DASLK	6	QNNMSNITLKNTLKSTDASLKIPEKNKVQTN	PF02_0144;PFB0695c
PF3D7_0930600	CYP72	peptidyl-prolyl cis-trans isomerase	No	0.559937	1.08884	1.64878	0.98695	1.19073	1.70576	1.59179	PF3D7_0930600	427	S	___1	FKETLMNENS(1)DNDS(1)DIAIK	10	EKRIQKFKETLMNENSDNDSDIAIKYIKYND	PFI1490c
PF3D7_1215400		conserved Plasmodium protein, unknown function	No	0.559563	-3.29876	-2.73919	-3.46529	-3.13223	-2.70265	-2.77574	PF3D7_1215400	292	S	___1	KIS(0.893)DEINNEHILDY(0.107)INNIDNINNNMNYYNK	3	DKITDSGEYVDLKKISDEINNEHILDYINNI	2277.t00150;MAL12P1.149;PFL0745c
PF3D7_1308200	cpsSII	carbamoyl phosphate synthetase	No	0.559508	0.025362	0.58487	0.0949497	-0.0442257	0.50127	0.66847	PF3D7_1308200	317	S	___2	MNLIT(0.008)S(0.991)S(0.884)EEY(0.117)LK	6	VINHTLLRDKMNLITSSEEYLKDLHNCNFSN	PF13_0044
PF3D7_1308200	cpsSII	carbamoyl phosphate synthetase	No	0.559508	0.025362	0.58487	0.0949497	-0.0442257	0.50127	0.66847	PF3D7_1308200	318	S	___2	MNLIT(0.018)S(0.957)S(0.98)EEY(0.045)LK	7	INHTLLRDKMNLITSSEEYLKDLHNCNFSNS	PF13_0044
PF3D7_1140700		conserved Plasmodium protein, unknown function	No	0.559117	-1.27227	-0.71315	-1.13169	-1.41285	-0.7136	-0.7127	PF3D7_1140700	2217	S	___1	DLS(0.817)LT(0.17)S(0.013)YEMEER	3	DDDNNNNNNNIIKDLSLTSYEMEERLSSMSV	PF11_0418
PF3D7_0401800	PfD80	Plasmodium exported protein (PHISTb), unknown function	Yes	0.558603	-1.37021	-0.811604	-1.36611	-1.37431	-0.819359	-0.80385	PF3D7_0401800	163	T	___1	SAS(0.192)T(0.807)ASTAR	4	TTRSASAASTTRSASTASTARSASTASTASA	MAL4P1.16;PFD0080c
PF3D7_0606000	KIC1	conserved Plasmodium protein, unknown function	No	0.558318	1.3072	1.86552	1.28313	1.33126	1.90793	1.8231	PF3D7_0606000	542	S	___1	RQES(1)VSK	4	NSIYDNICDSFKRQESVSKSLLFSDKNKQIE	2270.t00255;MAL6P1.63;PFF0295c
PF3D7_1123400	ERF3	translation elongation factor EF-1, subunit alpha, putative	No	0.558223	-3.84361	-3.28538	-3.65189	-4.03533	-3.25061	-3.32016	PF3D7_1123400	33	S	___1	GAGAEEDDENNS(0.5)NLDNT(0.5)NNENNINMNNDVNNDLDK	12	MKYKGAGAEEDDENNSNLDNTNNENNINMNN	PF11_0245
PF3D7_1123400	ERF3	translation elongation factor EF-1, subunit alpha, putative	No	0.558223	-3.84361	-3.28538	-3.65189	-4.03533	-3.25061	-3.32016	PF3D7_1123400	38	T	___1	GAGAEEDDENNS(0.5)NLDNT(0.5)NNENNINMNNDVNNDLDK	17	AGAEEDDENNSNLDNTNNENNINMNNDVNND	PF11_0245
PF3D7_0521000		conserved Plasmodium protein, unknown function	No	0.556111	-1.1638	-0.607685	-1.07962	-1.24797	-0.55542	-0.65995	PF3D7_0521000	33	S	___1	WDNIHS(0.999)LT(0.001)K	6	NEEELKKHRKWDNIHSLTKEKKNSKHENEEE	MAL5P1.211;PFE1055c
PF3D7_0319700	ABCI3	ABC transporter I family member 1, putative	No	0.555813	-1.6154	-1.05958	-1.69192	-1.53888	-1.09619	-1.02298	PF3D7_0319700	2714	T	___1	GEGIYT(1)NDENQFDDYIDKYSLYDLR	6	VYEQDIQLYKGEGIYTNDENQFDDYIDKYSL	MAL3P7.4;PFC0875w
PF3D7_0504000	ATPase3	cation transporting P-ATPase	No	0.555138	-3.29659	-2.74145	-3.25084	-3.34235	-2.7996	-2.68331	PF3D7_0504000	735	S	___2	YQEGEEEEEY(0.236)EEDHS(0.882)S(0.882)IHIDK	15	RYQEGEEEEEYEEDHSSIHIDKKKNKKKKNN	MAL5P1.40;PFE0195w
PF3D7_0504000	ATPase3	cation transporting P-ATPase	No	0.555138	-3.29659	-2.74145	-3.25084	-3.34235	-2.7996	-2.68331	PF3D7_0504000	736	S	___2	YQEGEEEEEY(0.236)EEDHS(0.882)S(0.882)IHIDK	16	YQEGEEEEEYEEDHSSIHIDKKKNKKKKNNK	MAL5P1.40;PFE0195w
PF3D7_1004400		RNA-binding protein, putative	No	0.555007	-1.96312	-1.40811	-1.85	-2.07623	-1.48015	-1.33607	PF3D7_1004400	659	S	___1	S(0.452)S(0.548)EEVGEHTNS(1)IINEDINKDQTDIIDEK	11	KRILKSSEEVGEHTNSIINEDINKDQTDIID	PF10_0047
PF3D7_0814000		60S ribosomal protein L13-2, putative	No	0.554728	-1.29071	-0.735985	-1.37189	-1.20954	-0.975939	-0.496031	PF3D7_0814000	121	S	___1	NS(1)LVMIPLK	2	ESLTKNVERLLKYKNSLVMIPLKKNKAKKGI	PF08_0075
PF3D7_1219000	FRM2	formin 2	No	0.553952	-2.1823	-1.62834	-2.08007	-2.28452	-1.57706	-1.67963	PF3D7_1219000	1650	S	___1	KGHS(1)FNK	4	LEEKEELMNTYKKGHSFNKVKELYEQESLDI	2277.t00185;MAL12P1.186;PFL0925w
PF3D7_0914900		BSD-domain protein, putative	No	0.553787	-0.035902	0.517885	0.0480614	-0.119865	0.57634	0.459431	PF3D7_0914900	556	S	___1	FLDEIS(1)EANRS(1)ACDLEEPK	6	FQKISEYNTKFLDEISEANRSACDLEEPKSD	PFI0730w
PF3D7_0532400	LyMP	lysine-rich membrane-associated PHISTb protein	Yes	0.553317	-0.263572	0.289745	-0.274069	-0.253075	0.27327	0.306221	PF3D7_0532400	317	S	___1	SNPNNEIS(1)LR	8	KKLRNRRKSNPNNEISLRTYGQSTNPQVYRR	MAL5P1.315;PFE1605w
PF3D7_1436300	PTEX150	translocon component PTEX150	No	0.552857	0.744637	1.29749	0.8001	0.689175	1.31122	1.28377	PF3D7_1436300	940	S	___1	NNS(1)NDDDDMDNGYVTFDGK	3	SRKENPFVPTNTKNNSNDDDDMDNGYVTFDG	PF14_0344;Pf112
PF3D7_0906600		zinc finger protein, putative	No	0.552432	0.480173	1.03261	0.825121	0.135225	1.24917	0.81604	PF3D7_0906600	3	T	___2	S(0.439)T(0.561)NT(0.561)S(0.439)KKGYNK	2	_____________MSTNTSKKGYNKYMDKRM	PFI0325c
PF3D7_0906600		zinc finger protein, putative	No	0.552432	0.480173	1.03261	0.825121	0.135225	1.24917	0.81604	PF3D7_0906600	5	T	___2	S(0.439)T(0.561)NT(0.561)S(0.439)KKGYNK	4	___________MSTNTSKKGYNKYMDKRMYV	PFI0325c
PF3D7_0719300	ARP6	actin-related protein, putative	No	0.551968	0.551718	1.10369	0.597631	0.505804	1.03401	1.17336	PF3D7_0719300	801	S	___1	YSDDS(0.001)NKYS(0.999)DDNNKYNIDK	9	NNNNNNKYSDDSNKYSDDNNKYNIDKCNGRK	PF07_0077
PF3D7_1104200	SNF2L	chromatin remodeling protein	No	0.551528	-0.419292	0.132236	-0.17638	-0.662205	0.320601	-0.0561295	PF3D7_1104200	814	S	___1	TQDISS(0.003)IS(0.997)DEDIDIILADAEKR	8	FGAPEVYKTQDISSISDEDIDIILADAEKRT	PF11_0053
PF3D7_0305200		conserved Plasmodium protein, unknown function	No	0.550467	-0.177952	0.372516	-0.229229	-0.126675	0.48525	0.259781	PF3D7_0305200	186	S	___1	S(0.768)T(0.111)S(0.111)INY(0.003)T(0.006)DNSFVLNK	1	VSYENVLNDNFIKSRSTSINYTDNSFVLNKE	MAL3P2.16;PFC0235w
PF3D7_1334700	MSRP7	MSP7-like protein	Yes	0.550384	0.630932	1.18132	0.58091	0.680954	1.15318	1.20945	PF3D7_1334700	180	S	___1	GT(0.144)S(0.837)QNDS(0.019)DYLHSVYDK	3	LCGHTKDNHNNLRGTSQNDSDYLHSVYDKAL	PF13_0194
PF3D7_0404600		conserved Plasmodium membrane protein, unknown function	No	0.550363	-2.55955	-2.00919	-2.67287	-2.44624	-1.97613	-2.04225	PF3D7_0404600	2039	S	___1	FS(0.128)DDS(0.872)DHVDEK	5	ISLNNYLKNFKFSDDSDHVDEKHMDDTSDDE	MAL4P1.44;PFD0220c;PFD0220w;PFD0225w
PF3D7_0627800	ACS	acetyl-CoA synthetase, putative	No	0.550227	-0.826742	-0.276515	-0.76433	-0.889154	-0.32243	-0.2306	PF3D7_0627800	456	S	___2	ISYSEKS(0.999)YS(0.001)K	7	TKNNPINHKISYSEKSYSKELINTDMVNNDN	2270.t00165;MAL6P1.150;PFF1350c
PF3D7_1116800	HSP101	heat shock protein 101	Yes	0.548998	3.10686	3.65586	3.21937	2.99434	3.6775	3.63421	PF3D7_1116800	356	S	___1	FIESCS(1)AFER	6	GATTIAEYRKFIESCSAFERRFEKILVEPPS	PF11_0175
PF3D7_1334500	MSRP6	MSP7-like protein	Yes	0.548878	0.895818	1.4447	0.9062	0.885435	1.51649	1.3729	PF3D7_1334500	49	S	___1	NEVFNALNEHLES(1)ISNIVK	13	VKKNEVFNALNEHLESISNIVKVNIMDALSN	PF13_0192
PF3D7_1023900	CHD1	chromodomain-helicase-DNA-binding protein 1 homolog, putative	No	0.548858	-0.687012	-0.138154	-0.564219	-0.809805	-0.135239	-0.141069	PF3D7_1023900	2028	S	___3	T(1)S(1)T(1)HIT(1)EK	2	DKNSKHLKKKRQRRTSTHITEKDKFRLYRSL	PF10_0232
PF3D7_1023900	CHD1	chromodomain-helicase-DNA-binding protein 1 homolog, putative	No	0.548858	-0.687012	-0.138154	-0.564219	-0.809805	-0.135239	-0.141069	PF3D7_1023900	2027	T	___3	T(1)S(1)T(1)HIT(1)EK	1	NDKNSKHLKKKRQRRTSTHITEKDKFRLYRS	PF10_0232
PF3D7_1023900	CHD1	chromodomain-helicase-DNA-binding protein 1 homolog, putative	No	0.548858	-0.687012	-0.138154	-0.564219	-0.809805	-0.135239	-0.141069	PF3D7_1023900	2029	T	___3	T(1)S(1)T(1)HIT(1)EK	3	KNSKHLKKKRQRRTSTHITEKDKFRLYRSLL	PF10_0232
PF3D7_1023900	CHD1	chromodomain-helicase-DNA-binding protein 1 homolog, putative	No	0.548858	-0.687012	-0.138154	-0.564219	-0.809805	-0.135239	-0.141069	PF3D7_1023900	2032	T	___3	T(1)S(1)T(1)HIT(1)EK	6	KHLKKKRQRRTSTHITEKDKFRLYRSLLKFG	PF10_0232
PF3D7_0202000	KAHRP	knob-associated histidine-rich protein	Yes	0.548208	-0.237738	0.310471	-0.22196	-0.253515	0.287291	0.333651	PF3D7_0202000	560	S	___2	EAS(0.701)T(0.283)S(0.016)KEATKEAS(0.016)T(0.283)S(0.701)K	15	KEASTSKEATKEASTSKEATKEASTSKEATK	PF02_0020;PFB0100c
PF3D7_1478600	PTP3	EMP1-trafficking protein	Yes	0.547878	3.58849	4.13637	3.56645	3.61053	4.06347	4.20927	PF3D7_1478600	673	S	___1	NEKS(1)IPNK	4	SKLDTQNGKNEKNEKSIPNKLDSQNGKNEKN	PF14_0758
PF3D7_1248500		bax inhibitor 1, putative	No	0.546652	2.30218	2.84883	2.34772	2.25665	2.85788	2.83979	PF3D7_1248500	38	S	___1	DKENYDKS(0.992)NS(0.008)GQK	8	GYNYSQNKDKENYDKSNSGQKGYYYDARTNI	2277.t00465;MAL12P1.464;PFL2325c
PF3D7_1307800		fork head domain protein, putative	No	0.546373	-0.607537	-0.0611639	-0.444489	-0.770586	0.0839615	-0.206289	PF3D7_1307800	242	S	___2	S(0.92)S(0.088)EHT(0.409)RT(0.304)S(0.262)KDNS(0.012)Y(0.002)YDSK	1	DKYDKQMDKIYILKKSSEHTRTSKDNSYYDS	PF13_0042
PF3D7_0923400		conserved Plasmodium protein, unknown function	No	0.545663	0.407793	0.953456	0.45499	0.360596	0.867071	1.03984	PF3D7_0923400	424	S	___1	NSFKEEFKENS(0.981)S(0.019)K	11	GDIKKNSFKEEFKENSSKRKSYSVNKISRKS	PFI1150w
PF3D7_0918900	gammaGCS	gamma-glutamylcysteine synthetase	No	0.545232	-2.57275	-2.02752	-2.73294	-2.41257	-2.12516	-1.92988	PF3D7_0918900	1042	T	___2	T(0.967)IY(0.033)EES(0.998)MDNT(0.002)VEFAK	1	EVLKDDQDYCTCTRRTIYEESMDNTVEFAKK	PFI0925w
PF3D7_0922200	SAMS	S-adenosylmethionine synthetase	No	0.544713	-3.18302	-2.6383	-3.23368	-3.13235	-2.86498	-2.41163	PF3D7_0922200	373	S	___1	T(0.418)S(0.582)AYGHFGR	2	IIQELKLTEPVFSKTSAYGHFGREGDTFTWE	PFI1090w
PF3D7_0302500	CLAG3.1	cytoadherence linked asexual protein 3.1	Yes	0.544248	-1.96377	-1.41953	-1.88393	-2.04362	-1.5152	-1.32385	PF3D7_0302500;PF3D7_0302200	533;535	S	___1	QIS(0.087)KDS(0.913)NLLNNITK	6	IEKCHSDQARQISKDSNLLNNITKCDLCKGA	MAL3P1.5;PFC0120w
PF3D7_1443100		conserved Plasmodium protein, unknown function	No	0.543688	-1.23931	-0.695624	-1.30686	-1.17176	-0.542759	-0.84849	PF3D7_1443100	217	S	___1	FNRS(0.708)S(0.292)K	4	NNNNNINNRSFKFNRSSKNKYDENDFNNHKK	PF14_0409
PF3D7_1142100		conserved Plasmodium protein, unknown function	No	0.542338	-3.1309	-2.58856	-2.94731	-3.3145	-2.44428	-2.73285	PF3D7_1142100	538	S	___2	AT(0.139)S(0.84)DLS(0.277)S(0.744)IHNK	3	KNKKKTTLSDNEKATSDLSSIHNKKINNNMN	PF11_0433
PF3D7_1142100		conserved Plasmodium protein, unknown function	No	0.542338	-3.1309	-2.58856	-2.94731	-3.3145	-2.44428	-2.73285	PF3D7_1142100	542	S	___2	AT(0.139)S(0.84)DLS(0.277)S(0.744)IHNK	7	KTTLSDNEKATSDLSSIHNKKINNNMNNMDN	PF11_0433
PF3D7_1333600	UTP4	U3 small nucleolar RNA-associated protein 4, putative	No	0.541852	-5.24862	-4.70676	-5.23676	-5.26048	-4.91762	-4.49591	PF3D7_1333600	239	S	___1	LS(0.823)T(0.177)DIDHLVDQYDER	2	VNNNIEYITNKRMRLSTDIDHLVDQYDEREN	PF13_0184
PF3D7_1219600	ATPase2	aminophospholipid-transporting P-ATPase	No	0.540638	2.27598	2.81662	2.28434	2.26763	2.82836	2.80488	PF3D7_1219600	622	S	___1	EIS(1)S(1)RVIS(0.966)FKDS(0.034)K	4	SSLGIISNAPKREISSRVISFKDSKEKNYIY	2277.t00190;MAL12P1.190;PFL0950c
PF3D7_1410400	RAP1	rhoptry-associated protein 1	No	0.540558	2.06154	2.6021	2.16439	1.95869	2.57834	2.62586	PF3D7_1410400	149	S	___2	S(0.002)S(0.002)S(0.002)PS(0.429)S(0.502)T(0.091)KS(0.934)S(0.033)S(0.005)PS(0.001)NVK	6	PSGTQTSGLKSSSPSSTKSSSPSNVKSASPH	PF14_0102
PF3D7_1410400	RAP1	rhoptry-associated protein 1	No	0.540558	2.06154	2.6021	2.16439	1.95869	2.57834	2.62586	PF3D7_1410400	152	S	___2	S(0.002)S(0.002)S(0.002)PS(0.429)S(0.502)T(0.091)KS(0.934)S(0.033)S(0.005)PS(0.001)NVK	9	TQTSGLKSSSPSSTKSSSPSNVKSASPHGES	PF14_0102
PF3D7_0420300	ApiAP2	AP2 domain transcription factor, putative	No	0.540302	-0.829752	-0.28945	-0.72139	-0.938114	-0.46002	-0.118879	PF3D7_0420300	728	S	___1	NECNANNGS(1)DKEHLKEEDVCNK	9	NFFGLFKNECNANNGSDKEHLKEEDVCNKNT	MAL4P1.192;PFD0985w
PF3D7_1117700	RAN	GTP-binding nuclear protein RAN/TC4	No	0.540257	0.818938	1.3592	0.760441	0.877436	1.21197	1.50642	PF3D7_1117700	168	S	___1	RLS(1)NQPNLVFVGEHAK	3	NYNFEKPFLWLARRLSNQPNLVFVGEHAKAP	PF11_0183
PF3D7_0317300		conserved Plasmodium protein, unknown function	No	0.539712	1.37952	1.91923	1.34245	1.41658	1.94043	1.89803	PF3D7_0317300	22	S	___1	NEKDDYDKVNEEEYS(1)LENFR	15	KNEKDDYDKVNEEEYSLENFRGIDMNNNVDI	MAL3P6.11;PFC0760c
PF3D7_0502600		conserved Plasmodium protein, unknown function	No	0.538978	-2.85015	-2.31117	-2.89565	-2.80465	-2.42891	-2.19343	PF3D7_0502600	252	S	___3	IY(1)LS(1)S(1)WLY(1)INERIIDLGGK	4	DYIMKMGYKFIKIYLSSWLYINERIIDLGGK	PFE0127c
PF3D7_0502600		conserved Plasmodium protein, unknown function	No	0.538978	-2.85015	-2.31117	-2.89565	-2.80465	-2.42891	-2.19343	PF3D7_0502600	253	S	___3	IY(1)LS(1)S(1)WLY(1)INERIIDLGGK	5	YIMKMGYKFIKIYLSSWLYINERIIDLGGKN	PFE0127c
PF3D7_0502600		conserved Plasmodium protein, unknown function	No	0.538978	-2.85015	-2.31117	-2.89565	-2.80465	-2.42891	-2.19343	PF3D7_0502600	250	Y	___3	IY(1)LS(1)S(1)WLY(1)INERIIDLGGK	2	IYDYIMKMGYKFIKIYLSSWLYINERIIDLG	PFE0127c
PF3D7_0502600		conserved Plasmodium protein, unknown function	No	0.538978	-2.85015	-2.31117	-2.89565	-2.80465	-2.42891	-2.19343	PF3D7_0502600	256	Y	___3	IY(1)LS(1)S(1)WLY(1)INERIIDLGGK	8	KMGYKFIKIYLSSWLYINERIIDLGGKNKIK	PFE0127c
PF3D7_1360400		conserved Plasmodium protein, unknown function	No	0.538487	0.156623	0.69511	0.12516	0.188086	0.743481	0.64674	PF3D7_1360400	179	S	___1	THNDNDNT(0.06)S(0.94)ETSK	9	SNEVFLKTHNDNDNTSETSKIINMDDDIIKN	PF13_0319
PF3D7_1110900		ES2 protein, putative	No	0.537168	3.36804	3.90521	3.31521	3.42088	3.9706	3.83982	PF3D7_1110900	242	S	___1	YFEEDENYSLVNYVHS(1)DQEYIK	16	YFEEDENYSLVNYVHSDQEYIKEKKKKKYKK	PF11_0115
PF3D7_1218900		conserved Plasmodium protein, unknown function	No	0.536872	-2.19694	-1.66007	-2.17268	-2.2212	-1.62615	-1.69399	PF3D7_1218900	221	Y	___1	MNS(0.192)Y(0.696)NWDS(0.054)Y(0.047)FT(0.01)QDKEIYK	4	LYNTNNVTHKVRMNSYNWDSYFTQDKEIYKK	2277.t00184;MAL12P1.184;PFL0920c
PF3D7_0924100		conserved Plasmodium protein, unknown function	No	0.536848	1.08111	1.61796	1.07942	1.08279	1.6629	1.57301	PF3D7_0924100	331	S	___1	KGDS(1)NHELK	4	EEEMKQNMESIKKGDSNHELKGKNSQKTDDS	PFI1185c
PF3D7_0922100		ubiquitin-like protein, putative	No	0.534627	-2.48545	-1.95082	-2.60684	-2.36407	-1.9386	-1.96305	PF3D7_0922100	514	S	___1	KY(0.001)Y(0.007)DS(0.629)NS(0.547)S(0.981)IS(0.836)PNEDAYVER	8	ITNKHKKKKYYDSNSSISPNEDAYVERIRRD	PFI1085w
PF3D7_0702500		Plasmodium exported protein, unknown function	Yes	0.534543	-3.10482	-2.57028	-3.20407	-3.00558	-2.70361	-2.43695	PF3D7_0702500	199	T	___2	NYS(0.002)LGNLS(0.523)T(0.57)GT(0.68)T(0.302)S(0.218)QGS(0.607)T(0.078)S(0.017)S(0.004)R	11	LPAGRNYSLGNLSTGTTSQGSTSSRHYSLGG	PF07_0008
PF3D7_1428700		conserved protein, unknown function	No	0.534328	-1.11091	-0.576584	-1.03926	-1.18257	-0.592669	-0.560499	PF3D7_1428700	183	S	___1	YYKDNDS(1)NDNNKDNDNNNNNNNNNNNNNNK	7	NDTLLKEHKYYKDNDSNDNNKDNDNNNNNNN	PF14_0266
PF3D7_0401800	PfD80	Plasmodium exported protein (PHISTb), unknown function	Yes	0.534012	-0.308931	0.22508	-0.270988	-0.346874	0.10663	0.343531	PF3D7_0401800	280	T	___1	LPS(0.164)T(0.815)GS(0.021)TIRFPSTGSSR	4	PSTGSTSGSTTRLPSTGSTIRFPSTGSSRLE	MAL4P1.16;PFD0080c
PF3D7_0108300	ARP	conserved Plasmodium protein, unknown function	No	0.532792	-2.13346	-1.60067	-1.92913	-2.3378	-1.58701	-1.61433	PF3D7_0108300	1643	T	___1	T(0.881)S(0.119)LLKNDNIK	1	HGEHNIDNIVNKNVRTSLLKNDNIKTTTTER	MAL1P2.10;PFA0410w
PF3D7_0630300		DNA polymerase epsilon catalytic subunit A, putative	No	0.532698	-2.01906	-1.48636	-2.01446	-2.02365	-1.31793	-1.65479	PF3D7_0630300	1537	S	___1	KNS(0.964)IS(0.036)FK	3	IKKIRIEDKKQKKKNSISFKEQEDEETNKEK	2270.t00191;MAL6P1.125;PFF1470c
PF3D7_1328300		conserved Plasmodium protein, unknown function	No	0.532643	2.27495	2.80759	2.18779	2.3621	2.82147	2.79371	PF3D7_1328300	328	T	___1	YNTYDKDICS(1)DIELT(1)DIDN	15	KYNTYDKDICSDIELTDIDN___________	PF13_0154
PF3D7_1467900		rab GTPase activator, putative	No	0.532272	-0.646792	-0.11452	-0.605129	-0.688456	-0.102409	-0.126631	PF3D7_1467900	1012	S	___1	HYS(1)CNVQR	3	SVDNYYHTLERLRHYSCNVQRNTENEDEVIQ	PF14_0647
PF3D7_1235100		conserved Plasmodium protein, unknown function	No	0.532232	1.07768	1.60992	1.25043	0.904936	1.52514	1.69469	PF3D7_1235100	60	S	___1	YNWGNSIDSTAAESKPIDEKDPMYDS(1)EIEK	26	AAESKPIDEKDPMYDSEIEKINKYLKK____	2277.t00339;MAL12P1.337;PFL1695c
PF3D7_0702400	SEMP1	small exported membrane protein 1	Yes	0.532078	-1.83161	-1.29953	-1.86328	-1.79995	-1.34453	-1.25454	PF3D7_0702400	19	T	___1	QQNEEGAATAANT(1)QEK	13	PQKQQNEEGAATAANTQEKKFNPTRNPSQSG	PF07_0007
PF3D7_1330200		conserved Plasmodium protein, unknown function	No	0.531753	-1.32225	-0.790495	-1.24996	-1.39454	-0.807819	-0.77317	PF3D7_1330200	179	T	___2	VFY(1)T(1)AELFWNQEK	4	YLTWVIEYEDRRVFYTAELFWNQEKSKMIKG	MAL13P1.161
PF3D7_1330200		conserved Plasmodium protein, unknown function	No	0.531753	-1.32225	-0.790495	-1.24996	-1.39454	-0.807819	-0.77317	PF3D7_1330200	178	Y	___2	VFY(1)T(1)AELFWNQEK	3	YYLTWVIEYEDRRVFYTAELFWNQEKSKMIK	MAL13P1.161
PF3D7_0628200	PK4	eukaryotic translation initiation factor 2-alpha kinase	No	0.531219	-1.73913	-1.20791	-1.63928	-1.83898	-1.13339	-1.28243	PF3D7_0628200	2120	S	___1	NLS(0.943)LIQT(0.028)S(0.028)HIPYDAPLADFLENGR	3	HEKLGNNKSSSARNLSLIQTSHIPYDAPLAD	2270.t00170;MAL6P1.146;PFF1370w
PF3D7_0905800		conserved Plasmodium protein, unknown function	No	0.531197	-1.18384	-0.652645	-1.14153	-1.22615	-0.73617	-0.56912	PF3D7_0905800	824	T	___1	FT(0.5)YDES(0.5)PFDNNINVK	2	NYKPSKFSTKRTNKFTYDESPFDNNINVKDA	PFI0285w
PF3D7_1021100		conserved Plasmodium protein, unknown function	No	0.530909	-0.615388	-0.0844793	-0.6961	-0.534676	-0.00272942	-0.166229	PF3D7_1021100	1338	S	___1	KNS(1)IDNMEHMK	3	EKDVVCMYNMNKKKNSIDNMEHMKNMKDVNN	PF10_0205
PF3D7_1116400	SEC12	guanine nucleotide-exchange factor SEC12	No	0.530787	1.31299	1.84378	1.29749	1.3285	1.79535	1.89221	PF3D7_1116400	200	T	___1	KDNDNKT(1)DDDNYIAVNNNLYLDK	7	DNKTNEDKKKDNDNKTDDDNYIAVNNNLYLD	PF11_0171
PF3D7_0812500		RNA-binding protein, putative	No	0.530503	0.297217	0.827721	0.3612	0.233234	0.742651	0.91279	PF3D7_0812500	886	S	___1	S(0.231)FS(0.678)ES(0.083)RY(0.001)DY(0.001)S(0.006)NK	3	NFNKKDTRRNHSKSFSESRYDYSNKYNDRKK	PF08_0086
PF3D7_0708800	HSP110c	heat shock protein 110	No	0.530472	-2.16574	-1.63527	-2.20184	-2.12963	-1.71932	-1.55121	PF3D7_0708800	863	T	___1	NNEEKENS(0.389)T(0.611)KNENS(1)ANPEE	9	EQNNEAKNNEEKENSTKNENSANPEE_____	PF07_0033
PF3D7_0818900	HSP70	heat shock protein 70	No	0.530273	-3.08026	-2.54999	-3.57579	-2.58473	-2.29832	-2.80166	PF3D7_0818900	278	T	___1	LRT(1)QCER	3	GKDLSKNSRALRRLRTQCERAKRTLSSSTQA	PF08_0054
PF3D7_0320000	I2	protein phosphatase inhibitor 2	No	0.530011	2.18665	2.71666	2.18846	2.18484	2.68281	2.75051	PF3D7_0320000	117	T	___1	S(0.016)GT(0.984)LDDIDEEYKPDNK	3	HYNEYKMLQKLRKSGTLDDIDEEYKPDNKDS	PFC0886w
PF3D7_0730900	PTP4	EMP1-trafficking protein	Yes	0.528852	3.77042	4.29928	3.79519	3.74566	4.21769	4.38086	PF3D7_0730900	2097	S	___1	GVNVQS(0.736)S(0.263)NT(0.001)NK	6	TLGKHKHHEKGVNVQSSNTNKHMPRKMLR__	MAL7P1.171
PF3D7_0507800		conserved Plasmodium protein, unknown function	No	0.528848	1.92052	2.44937	2.17331	1.66773	2.4348	2.46394	PF3D7_0507800	30	S	___1	YEENS(1)DDHIIFDDLSEYSPSIISNNDNIHVEK	5	IEMEEIKKITRYEENSDDHIIFDDLSEYSPS	MAL5P1.79;PFE0385w
PF3D7_0202000	KAHRP	knob-associated histidine-rich protein	Yes	0.528644	5.13663	5.66527	5.13789	5.13536	5.62791	5.70263	PF3D7_0202000	634	S	___1	NAANNGEQVMS(1)RGQAQLQEAGKK	11	ETADKNAANNGEQVMSRGQAQLQEAGKKKKK	PF02_0020;PFB0100c
PF3D7_1013600		conserved Plasmodium protein, unknown function	No	0.528088	-0.967327	-0.43924	-1.08216	-0.852495	-0.449589	-0.42889	PF3D7_1013600	244	S	___1	ENT(0.001)QEDS(0.569)S(0.427)Y(0.002)KNY(0.001)NYER	7	NTYDAYNERENTQEDSSYKNYNYERDKNNDI	PF10_0133
PF3D7_1149000	Pf332	antigen 332, DBL-like protein	Yes	0.527753	-2.43921	-1.91146	-2.34038	-2.53805	-2.08479	-1.73813	PF3D7_1149000	2572	S	___1	DVSPTEDFVEQT(0.019)DS(0.962)VT(0.019)EK	14	VKDVSPTEDFVEQTDSVTEKVIEQEGSNTEV	PF11_0506;PF11_0507
PF3D7_0218500	SNRPD2	small nuclear ribonucleoprotein Sm D2, putative	No	0.527392	1.18699	1.71438	1.23251	1.14146	1.7742	1.65456	PF3D7_0218500	3	S	___2	MKS(1)EVT(1)IEENRDNPEDGPLGLLSECVK	3	_____________MKSEVTIEENRDNPEDGP	PF02_0175;PFB0865w
PF3D7_0218500	SNRPD2	small nuclear ribonucleoprotein Sm D2, putative	No	0.527392	1.18699	1.71438	1.23251	1.14146	1.7742	1.65456	PF3D7_0218500	6	T	___2	MKS(1)EVT(1)IEENRDNPEDGPLGLLSECVK	6	__________MKSEVTIEENRDNPEDGPLGL	PF02_0175;PFB0865w
PF3D7_0905800		conserved Plasmodium protein, unknown function	No	0.526947	-2.62128	-2.09434	-2.6211	-2.62146	-2.18103	-2.00764	PF3D7_0905800	715	S	___1	QPFPQY(0.006)GPINT(0.372)PPS(0.622)INKK	14	NRQPFPQYGPINTPPSINKKNAHSNNNNNNN	PFI0285w
PF3D7_1442900	ARFGEF	protein transport protein SEC7, putative	No	0.526702	-5.33848	-4.81177	-5.06926	-5.60769	-4.55948	-5.06407	PF3D7_1442900	809	S	___1	KHSNSNNNNNDGNDY(0.111)DNDGS(0.883)LHQHNT(0.006)DNR	20	SNNNNNDGNDYDNDGSLHQHNTDNRRRTSFC	PF14_0407
PF3D7_0905800		conserved Plasmodium protein, unknown function	No	0.525813	-5.22761	-4.70179	-5.28337	-5.17185	-4.17207	-5.23152	PF3D7_0905800	666	S	___1	NVHS(1)QNYTR	4	DGMASSYNHMNKNVHSQNYTRMGDHSMDSPN	PFI0285w
PF3D7_1468800	U2AF2	splicing factor U2AF large subunit, putative	No	0.525123	0.225072	0.750195	0.21534	0.234804	0.71542	0.784969	PF3D7_1468800	18	S	___1	NS(0.376)NCKS(0.624)DVS(1)NIEENDKK	9	KKLTSLKNSNCKSDVSNIEENDKKNVKKSDT	PF14_0656
PF3D7_0401800	PfD80	Plasmodium exported protein (PHISTb), unknown function	Yes	0.524077	5.99076	6.51484	5.99897	5.98255	6.52601	6.50366	PF3D7_0401800	133	S	___1	S(1)AS(1)AASTTR	1	TASTASTASAASTTRSASAASTTRSASAAST	MAL4P1.16;PFD0080c
PF3D7_1409600		conserved Plasmodium protein, unknown function	No	0.523602	-2.65717	-2.13356	-2.6685	-2.64583	-1.90395	-2.36318	PF3D7_1409600	330	S	___1	KNKNS(0.973)IS(0.026)NYNK	5	DLYKLSKKKLKKNKNSISNYNKKQENNDILT	PF14_0094
PF3D7_0500800	MESA	mature parasite-infected erythrocyte surface antigen	Yes	0.523244	-2.0596	-1.53635	-1.95784	-2.16136	-1.57837	-1.49434	PF3D7_0500800	448	T	___2	NIET(1)DDEEET(1)LVVKDDAK	4	FQMLGCNFLCNKNIETDDEEETLVVKDDAKK	MAL5P1.9;PFE0040c
PF3D7_0500800	MESA	mature parasite-infected erythrocyte surface antigen	Yes	0.523244	-2.0596	-1.53635	-1.95784	-2.16136	-1.57837	-1.49434	PF3D7_0500800	454	T	___2	NIET(1)DDEEET(1)LVVKDDAK	10	NFLCNKNIETDDEEETLVVKDDAKKKHKFLR	MAL5P1.9;PFE0040c
PF3D7_1033600	CEF1	myb2 transcription factor, putative	No	0.523018	-1.65864	-1.13562	-1.68272	-1.63456	-1.05826	-1.21298	PF3D7_1033600	517	S	___2	NIS(1)LYAHSIISYK	3	KNKIISDIKSFKKNISLYAHSIISYKNLKND	PF10_0327
PF3D7_1033600	CEF1	myb2 transcription factor, putative	No	0.523018	-1.65864	-1.13562	-1.68272	-1.63456	-1.05826	-1.21298	PF3D7_1033600	522	S	___2	NIS(0.997)LY(0.003)AHS(1)IISYK	8	SDIKSFKKNISLYAHSIISYKNLKNDQSMMD	PF10_0327
PF3D7_1123100	CDPK7	calcium-dependent protein kinase 7	No	0.522968	-4.6856	-4.16263	-4.46159	-4.90961	-4.21269	-4.11257	PF3D7_1123100	1330	T	___2	AEEHVT(0.958)DES(0.346)S(0.318)FEY(0.378)NQNGVFR	6	KDEKNEEINKAEEHVTDESSFEYNQNGVFRN	PF11_0242
PF3D7_1366300		conserved Plasmodium protein, unknown function	No	0.522948	-2.61776	-2.09481	-2.59681	-2.63871	-2.03951	-2.15012	PF3D7_1366300	404	S	___1	HYRES(1)K	5	NDEISNNQEEKHYRESKNVSENIQEESITKE	MAL13P1.333;MAL13P1.334
PF3D7_0731100	PTP2	EMP1-trafficking protein	Yes	0.522643	-1.60374	-1.0811	-1.58271	-1.62477	-1.0938	-1.0684	PF3D7_0731100	477	S	___1	GSFFS(1)DPENYRETDKK	5	YKKEENPQMPKGSFFSDPENYRETDKKNNNL	MAL7P1.172
PF3D7_1347700	ECT	ethanolamine-phosphate cytidylyltransferase	No	0.521998	-0.313747	0.208251	-0.24987	-0.377625	0.127531	0.288971	PF3D7_1347700	166	S	___1	LGDIVVVGINS(1)DEDALNSK	11	RQAKKLGDIVVVGINSDEDALNSKGVKPIYT	PF13_0253
PF3D7_1353400		Ran-binding protein, putative	No	0.521708	-1.04054	-0.51883	-0.96891	-1.11217	-0.49831	-0.539351	PF3D7_1353400	1037	S	___1	NKDNISDINIIEKQS(1)NDDHNNK	15	KNKDNISDINIIEKQSNDDHNNKQRIDNSSY	PF13_0278
PF3D7_0814200	ALBA1	DNA/RNA-binding protein Alba 1	No	0.521338	3.29042	3.81176	3.42868	3.15215	3.86694	3.75657	PF3D7_0814200	88	S	___1	CGSTVITDQYVS(1)GQDNS(1)EHVVQEK	17	GSTVITDQYVSGQDNSEHVVQEKTVSFIEIL	PF08_0074
PF3D7_1473200		DnaJ protein, putative	No	0.521203	-0.426087	0.0951157	-0.34738	-0.504795	0.084301	0.10593	PF3D7_1473200	211	S	___1	NQEEGS(0.854)T(0.145)NCS(0.001)NVVEEEMTLEK	6	VVEQLNDQERNQEEGSTNCSNVVEEEMTLEK	PF14_0700
PF3D7_0624000	HK	hexokinase	No	0.521132	2.12387	2.64501	1.93053	2.31721	3.02697	2.26304	PF3D7_0624000	18	T	___1	LDT(1)IECDIPINEELSWR	3	EYDIAKNDVTYTKLDTIECDIPINEELSWRI	2270.t00126;MAL6P1.189;PFF1155w
PF3D7_0401800	PfD80	Plasmodium exported protein (PHISTb), unknown function	Yes	0.521122	0.993228	1.51435	1.02293	0.963526	1.44292	1.58578	PF3D7_0401800	64	S	___2	S(0.288)S(0.341)S(0.407)CS(0.97)S(0.958)LAS(0.028)T(0.006)T(0.001)K	5	SEEKAEDDYKKSSSCSSLASTTKRSPSTAST	MAL4P1.16;PFD0080c
PF3D7_1408200	ApiAP2	AP2 domain transcription factor AP2-G2, putative	No	0.521087	0.0384331	0.55952	0.0390415	0.0378246	0.63158	0.487459	PF3D7_1408200	933	S	___1	NNLSNNDPIDKS(1)VEKDIFTDQYK	12	LDEKNNLSNNDPIDKSVEKDIFTDQYKTNKN	PF14_0079
PF3D7_1107300	PAIP1	polyadenylate-binding protein-interacting protein 1, putative	No	0.520477	-1.60832	-1.08784	-1.27486	-1.94179	-0.94031	-1.23538	PF3D7_1107300	1430	S	___2	KEKLS(0.297)VS(0.731)S(0.875)IY(0.097)EGSNNEK	8	NNNNNNKKKEKLSVSSIYEGSNNEKNQNVED	PF11_0086
PF3D7_0519700		FoP domain-containing protein, putative	No	0.519012	2.37183	2.89084	2.24938	2.49427	3.0131	2.76858	PF3D7_0519700	145	S	___1	LT(0.151)S(0.849)KDLDDELDKYMGSSNVK	3	FRKNQNLHDKIGKLTSKDLDDELDKYMGSSN	MAL5P1.198;PFE0990w
PF3D7_0202400	PTEF	gamete antigen 27/25, putative	No	0.518667	-1.41122	-0.89255	-1.31577	-1.50666	-0.865519	-0.91958	PF3D7_0202400	505	T	___1	GEYGEGT(1)DDEEDKEK	7	TDVDEKKEKGEYGEGTDDEEDKEKEEDDEET	PF02_0024;PFB0115w
PF3D7_0301700		Plasmodium exported protein, unknown function	Yes	0.518608	1.03749	1.5561	1.02863	1.04635	1.53222	1.57998	PF3D7_0301700	152	S	___2	VTVLEPQTENS(1)EDEENYEK	11	NSTPRVTVLEPQTENSEDEENYEKTIVDELN	MAL3P8.15;PFC0085c
PF3D7_1011800	PREBP	PRE-binding protein	No	0.518353	0.239228	0.757581	0.209541	0.268915	0.73068	0.784481	PF3D7_1011800	647	S	___1	NS(1)DIEEAEEKLNEILK	2	AKTFDASATIKGSKNSDIEEAEEKLNEILKN	PF10_0115
PF3D7_1250400		conserved Plasmodium protein, unknown function	No	0.517913	2.01384	2.53176	2.12362	1.90406	2.50497	2.55854	PF3D7_1250400	46	S	___1	S(0.004)DMS(0.004)LIIS(0.991)EQLRK	8	IKMFENIKSDMSLIISEQLRKRSRTTFKLKN	2277.t00484;MAL12P1.482;PFL2420w
PF3D7_1001500	ETRAMP10	early transcribed membrane protein 10.1	Yes	0.517823	2.96957	3.4874	3.04122	2.89792	3.54246	3.43233	PF3D7_1001500	99	S	___1	SQEGS(0.985)T(0.015)PLLTAKA	5	DKKGSNDSKNKSQEGSTPLLTAKA_______	PF10_0019
PF3D7_0708800	HSP110c	heat shock protein 110	No	0.517458	2.40485	2.92231	2.41518	2.39451	2.91198	2.93263	PF3D7_0708800	862	S	___1	NNEEKENS(0.986)T(0.014)KNENSANPEE	8	EEQNNEAKNNEEKENSTKNENSANPEE____	PF07_0033
PF3D7_1466900		rhoptry protein, putative	No	0.517207	0.145082	0.66229	0.0837402	0.206425	0.61685	0.707729	PF3D7_1466900	104	S	___1	NNS(1)LENNEINKYDYQNEYNK	3	FDLPNNLEDITSKNNSLENNEINKYDYQNEY	PF14_0637
PF3D7_0401800	PfD80	Plasmodium exported protein (PHISTb), unknown function	Yes	0.516962	1.20688	1.72384	1.29896	1.11481	1.6985	1.74919	PF3D7_0401800	291	S	___2	LPS(0.004)T(0.004)GS(0.003)T(0.003)IRFPS(0.154)T(0.154)GS(0.835)S(0.835)RLEDY(0.008)EK	15	RLPSTGSTIRFPSTGSSRLEDYEKEGSNVDI	MAL4P1.16;PFD0080c
PF3D7_0401800	PfD80	Plasmodium exported protein (PHISTb), unknown function	Yes	0.515988	1.30391	1.8199	1.28562	1.3222	1.80935	1.83044	PF3D7_0401800	302	S	___2	LEDYEKEGS(1)NVDITEEEEK	9	PSTGSSRLEDYEKEGSNVDITEEEEKEAESV	MAL4P1.16;PFD0080c
PF3D7_0401800	PfD80	Plasmodium exported protein (PHISTb), unknown function	Yes	0.515988	1.30391	1.8199	1.28562	1.3222	1.80935	1.83044	PF3D7_0401800	307	T	___2	LEDYEKEGS(1)NVDIT(1)EEEEK	14	SRLEDYEKEGSNVDITEEEEKEAESVDDNNK	MAL4P1.16;PFD0080c
PF3D7_1438400	MCA2	metacaspase-like protein	No	0.515513	-1.41003	-0.894514	-1.16409	-1.65597	-0.990108	-0.79892	PF3D7_1438400	712	S	___1	LITNIYQFTGGQS(1)QK	13	HEKLITNIYQFTGGQSQKSCNIKNQNVKEEK	PF14_0362;PF14_0363
PF3D7_0519400	RPS24	40S ribosomal protein S24	No	0.515488	-2.79707	-2.28158	-2.7934	-2.80074	-2.41584	-2.14732	PF3D7_0519400	34	S	___1	QFALEILHPNKGS(1)VAK	13	RRKQFALEILHPNKGSVAKKEVKERLAKMYK	MAL5P1.195;PFE0975c
PF3D7_0202000	KAHRP	knob-associated histidine-rich protein	Yes	0.515028	-0.136553	0.378475	-0.41976	0.146654	0.52244	0.23451	PF3D7_0202000	544	T	___1	GAT(1)KEAS(0.975)T(0.011)S(0.014)K	3	TNKGQCAAEGATKGATKEASTSKEATKEAST	PF02_0020;PFB0100c
PF3D7_1021700		conserved Plasmodium membrane protein, unknown function	No	0.513638	1.68431	2.19795	1.76987	1.59875	2.15755	2.23835	PF3D7_1021700	2091	S	___1	S(1)KEQFEDIINSNTK	1	NHHVKITNKQIKRSKSKEQFEDIINSNTKKT	PF10_0211;PF10_0212
PF3D7_0420300	ApiAP2	AP2 domain transcription factor, putative	No	0.512997	3.2859	3.7989	3.47626	3.09554	3.84379	3.75401	PF3D7_0420300	1281	S	___1	NEKCES(1)ESYLPNKLK	6	HDKYNELFVKNEKCESESYLPNKLKNKKKVS	MAL4P1.192;PFD0985w
PF3D7_0606000	KIC1	conserved Plasmodium protein, unknown function	No	0.512958	-0.372337	0.14062	-0.31572	-0.428955	0.0805511	0.200689	PF3D7_0606000	550	S	___1	SLLFS(1)DKNK	5	DSFKRQESVSKSLLFSDKNKQIEPIEISKND	2270.t00255;MAL6P1.63;PFF0295c
PF3D7_0529800		conserved Plasmodium protein, unknown function	No	0.512888	2.46185	2.97474	2.41699	2.50672	2.97577	2.97371	PF3D7_0529800	1065	S	___1	KYNS(1)YEK	4	AAYNNFHLEAQKKYNSYEKVIDNLKKEIDEL	MAL5P1.294;PFE1485w
PF3D7_0606000	KIC1	conserved Plasmodium protein, unknown function	No	0.512753	0.178878	0.69163	0.27775	0.0800056	0.65221	0.73105	PF3D7_0606000	735	S	___1	IEDVCS(0.977)LS(0.023)KEEEDALINIDR	6	SGHEKKKEIKIEDVCSLSKEEEDALINIDRN	2270.t00255;MAL6P1.63;PFF0295c
PF3D7_0815800	VPS9	vacuolar protein sorting-associated protein 9, putative	No	0.512678	0.373247	0.885925	0.52338	0.223114	0.805441	0.96641	PF3D7_0815800	1725	S	___1	TTFLNIS(1)DDEYKEK	7	IEFIKELGKTTFLNISDDEYKEKVANAEKSY	MAL8P1.82
PF3D7_0820000	SRCAP	Snf2-related CBP activator, putative	No	0.512653	-3.49393	-2.98128	-3.44439	-3.54348	-3.0311	-2.93146	PF3D7_0820000	316	S	___1	S(0.013)GDNS(0.987)IGEDDNNNDEK	5	NVIETSHNDEKSGDNSIGEDDNNNDEKGGDN	PF08_0048
PF3D7_0905400	RhopH3	high molecular weight rhoptry protein 3	Yes	0.512507	-4.10882	-3.59631	-4.2803	-3.93734	-3.47327	-3.71935	PF3D7_0905400	798	S	___1	S(0.007)T(0.007)S(0.007)AAS(0.776)T(0.153)S(0.032)DEIS(0.004)GS(0.004)EGPS(0.004)T(0.004)ES(0.001)T(0.001)STGNQGEDK	6	YMGPLKEQSKSTSAASTSDEISGSEGPSTES	PFI0265c
PF3D7_1222300	GRP94	endoplasmin, putative	No	0.512418	1.0916	1.60402	1.08711	1.09608	1.52361	1.68442	PF3D7_1222300	542	S	___1	S(0.973)IS(0.027)LDTYIEHMKPDQK	1	KIAKLLLFKTMQYPKSISLDTYIEHMKPDQK	2277.t00214;MAL12P1.214;PFL1070c
PF3D7_1022400	SRSF4	serine/arginine-rich splicing factor 4	No	0.512178	1.17261	1.68479	1.06627	1.27894	1.62485	1.74472	PF3D7_1022400	213	S	___1	RY(0.002)S(0.998)NES(1)GLS(1)DR	9	PKYKKRRRYSNESGLSDRDRSRSRRYSKSSN	PF10_0217
PF3D7_1339600		conserved Plasmodium protein, unknown function	No	0.511443	-0.365453	0.14599	-0.24725	-0.483656	0.14925	0.142731	PF3D7_1339600	443	Y	___1	QQGLAQIQKY(1)LNK	10	EENYYKQQGLAQIQKYLNKINSTYFLGKKKN	MAL13P1.201
PF3D7_1230200		vacuolar transporter chaperone, putative, pseudogene	No	0.510198	-0.729522	-0.219324	-0.619999	-0.839045	-0.0996189	-0.339029	PF3D7_1230200	937	S	___2	FNKYS(1)NNFKDIS(1)IK	5	IYSNNNNNINKFNKYSNNFKDISIKNTSLIY	2277.t00291;MAL12P1.291;PFL1455w
PF3D7_1230200		vacuolar transporter chaperone, putative, pseudogene	No	0.510198	-0.729522	-0.219324	-0.619999	-0.839045	-0.0996189	-0.339029	PF3D7_1230200	944	S	___2	YSNNFKDIS(1)IK	9	NINKFNKYSNNFKDISIKNTSLIYDNNLYEP	2277.t00291;MAL12P1.291;PFL1455w
PF3D7_1227700	KIC2	conserved Plasmodium protein, unknown function	No	0.509732	0.0386629	0.548395	-0.0441399	0.121466	0.48843	0.60836	PF3D7_1227700	238	S	___1	SILISQNEEIAS(1)LNEELKK	12	SKMKSILISQNEEIASLNEELKKKSKEIFYL	2277.t00268;MAL12P1.268;PFL1340c
PF3D7_1149000	Pf332	antigen 332, DBL-like protein	Yes	0.509652	2.16115	2.6708	2.15688	2.16542	2.62108	2.72053	PF3D7_1149000	277	S	___1	DLDS(0.003)NS(0.997)DKDGIVSESYK	6	AGNKNSNNLKDLDSNSDKDGIVSESYKATKK	PF11_0506;PF11_0507
PF3D7_0813300		conserved Plasmodium protein, unknown function	No	0.509238	-2.32167	-1.81243	-2.41	-2.23334	-1.80432	-1.82054	PF3D7_0813300	130	S	___1	NT(0.005)LKNS(0.992)LS(0.003)NGISK	6	NDEVRMLTKKNTLKNSLSNGISKRKKNLENN	MAL8P1.95
PF3D7_1027300	nPrx	peroxiredoxin	No	0.509203	0.571632	1.08084	0.520941	0.622324	1.06921	1.09246	PF3D7_1027300	53	T	___1	ANT(1)PGCTK	3	ENNEGIVVFTYPKANTPGCTKQAELFKEKHE	PF10_0268
PF3D7_0221200		Plasmodium exported protein (hyp15), unknown function	Yes	0.509182	-3.13171	-2.62253	-3.19592	-3.0675	-2.5972	-2.64786	PF3D7_0221200	60	T	___1	HT(0.995)LT(0.005)NSSLR	2	TRSLAEYGKEEFMKHTLTNSSLRNETILNDK	PF02_0198;PFB0953w
PF3D7_0517300	SR1	serine/arginine-rich splicing factor 1	No	0.508892	1.24817	1.75706	1.18445	1.31189	1.80787	1.70625	PF3D7_0517300	253	T	___1	RDT(1)YDK	3	SSSRSRSRSMDRRRDTYDKKRSYSRSLSYQE	MAL5P1.173;PFE0865c
PF3D7_1347500	ALBA4	DNA/RNA-binding protein Alba 4	No	0.507897	-1.31221	-0.804315	-1.28395	-1.34048	-0.72666	-0.881969	PF3D7_1347500	114	S	___2	IS(1)PGYVSFHEK	2	KIYMEKHPEFKGSRISPGYVSFHEKTDSFTP	MAL13P1.237
PF3D7_1347500	ALBA4	DNA/RNA-binding protein Alba 4	No	0.507897	-1.31221	-0.804315	-1.28395	-1.34048	-0.72666	-0.881969	PF3D7_1347500	119	S	___2	ISPGYVS(1)FHEK	7	KHPEFKGSRISPGYVSFHEKTDSFTPIYDEN	MAL13P1.237
PF3D7_0905400	RhopH3	high molecular weight rhoptry protein 3	Yes	0.507783	4.54299	5.05078	4.68601	4.39997	4.95828	5.14327	PF3D7_0905400	754	S	___1	QHS(1)AHFLDAIAEKDILEEK	3	ETVDEDAHHVNEKQHSAHFLDAIAEKDILEE	PFI0265c
PF3D7_0820200	PGPS	phosphatidylglycerophosphate synthase	No	0.507762	-1.13079	-0.623025	-1.08871	-1.17286	-0.5599	-0.68615	PF3D7_0820200	275	S	___1	MLNS(0.959)FS(0.021)T(0.021)DIFDKDTYNNK	4	NNKYSYTSNEFRMLNSFSTDIFDKDTYNNKN	MAL8P1.58
PF3D7_1362700		conserved Plasmodium protein, unknown function	No	0.507582	1.16143	1.66901	1.14367	1.1792	1.56913	1.7689	PF3D7_1362700	935	S	___1	IFVKS(1)CDENIMK	5	EENTGANNKEKIFVKSCDENIMKNYQHPENI	MAL13P1.313;PF13_0332
PF3D7_1036900		conserved Plasmodium protein, unknown function	No	0.507447	3.55248	4.05993	3.61774	3.48722	4.01964	4.10021	PF3D7_1036900	541	T	___2	LNYDMT(0.098)T(0.902)IT(1)EETNEFDHDVNKK	9	DPYTGQKLNYDMTTITEETNEFDHDVNKKVI	PF10_0361
PF3D7_1134600		zinc finger protein, putative	No	0.506883	-2.19302	-1.68614	-2.13838	-2.24767	-1.71275	-1.65953	PF3D7_1134600	1193	S	___1	NS(0.594)S(0.405)NNKNQNGTGNISK	2	LGYKSCSCVHNIIRNSSNNKNQNGTGNISKK	PF11_0357
PF3D7_1227700	KIC2	conserved Plasmodium protein, unknown function	No	0.506748	-2.77184	-2.26509	-2.69902	-2.84467	-2.26751	-2.26268	PF3D7_1227700	106	S	___1	ECNDS(1)HKDIS(0.984)LS(0.016)R	10	ILPIVKECNDSHKDISLSRNENSIHNISENS	2277.t00268;MAL12P1.268;PFL1340c
PF3D7_0706500		conserved Plasmodium protein, unknown function	No	0.506324	-0.141208	0.365116	-0.23353	-0.0488853	0.267431	0.462801	PF3D7_0706500	707	S	___1	KS(0.076)S(0.914)NDY(0.01)EK	3	ITGEDVVLKDENKKSSNDYEKQNIDMHEPKA	MAL7P1.204
PF3D7_1132400		conserved Plasmodium membrane protein, unknown function	No	0.506143	-0.900123	-0.39398	-0.98151	-0.818735	-0.37921	-0.408751	PF3D7_1132400	444	S	___1	KENFEENMS(1)GLVK	9	LDFSEGKKENFEENMSGLVKNNYTDYNYYED	PF11_0333
PF3D7_0501200	PIESP2	parasite-infected erythrocyte surface protein	Yes	0.505928	-1.98029	-1.47436	-1.91691	-2.04366	-1.47759	-1.47113	PF3D7_0501200	269	T	___1	QES(0.119)RT(0.88)LILGS(0.001)FPQAGEILR	5	VGQAPPEKEIRQESRTLILGSFPQAGEILRE	MAL5P1.13;PFE0060w
PF3D7_1356000		conserved Plasmodium protein, unknown function	No	0.504778	0.304203	0.808981	0.37421	0.234196	0.731571	0.886391	PF3D7_1356000	1236	S	___1	YDNDIHYYS(1)DCTYEK	9	LSAYTNKYDNDIHYYSDCTYEKMIDIKKNKK	PF13_0298
PF3D7_1357100		elongation factor 1-alpha	No	0.504563	-0.0118628	0.492701	-0.14242	0.118694	0.476421	0.50898	PF3D7_1357100;PF3D7_1357000	46;46	S	___1	FEKES(1)AEMGK	5	LGGIDRRTIEKFEKESAEMGKGSFKYAWVLD	PF13_0305
PF3D7_0320000	I2	protein phosphatase inhibitor 2	No	0.504247	-2.24872	-1.74448	-2.22985	-2.2676	-1.62158	-1.86737	PF3D7_0320000	48	S	___1	ILEPNTPFNFILMDS(1)AS(0.999)EDEAS(0.001)K	15	KILEPNTPFNFILMDSASEDEASKYGDVKGS	PFC0886w
PF3D7_0212800	MATE	multidrug efflux pump, putative	No	0.503882	-0.940277	-0.436395	-0.943159	-0.937395	-0.410749	-0.46204	PF3D7_0212800	387	S	___1	S(0.175)S(0.823)YNIT(0.001)T(0.001)K	2	GHIRNNSIYPLSHKSSYNITTKGHTNQLEDE	PF02_0120;PFB0580w
PF3D7_0708800	HSP110c	heat shock protein 110	No	0.503852	0.442293	0.946145	0.45437	0.430216	0.90509	0.9872	PF3D7_0708800	862	S	___2	NNEEKENS(0.986)T(0.014)KNENSANPEE	8	EEQNNEAKNNEEKENSTKNENSANPEE____	PF07_0033
PF3D7_0812500		RNA-binding protein, putative	No	0.503708	-2.32344	-1.81973	-2.25159	-2.39528	-1.86449	-1.77497	PF3D7_0812500	26	T	___2	LEEERS(0.451)NT(0.557)CEET(0.986)EQVEET(0.005)S(0.001)NNK	12	SEERLEEERSNTCEETEQVEETSNNKRGRKQ	PF08_0086
PF3D7_1346300	ALBA2	DNA/RNA-binding protein Alba 2	No	0.503704	5.30365	5.80735	5.47933	5.12796	5.92236	5.69234	PF3D7_1346300	7	S	___1	S(0.999)DT(0.001)KLENEIR	1	_________MPGSTKSDTKLENEIRISYKSD	MAL13P1.233
PF3D7_1229000		conserved Plasmodium membrane protein, unknown function	No	0.503143	1.25911	1.76226	1.33019	1.18803	1.83146	1.69305	PF3D7_1229000	664	S	___1	IRNS(1)CEEDEENEK	4	DNINNNNLNDNKIRNSCEEDEENEKKKKKRK	2277.t00281;MAL12P1.281;PFL1405w
PF3D7_1360400		conserved Plasmodium protein, unknown function	No	0.503132	-2.5726	-2.06947	-2.62434	-2.52086	-2.01131	-2.12763	PF3D7_1360400	178	T	___1	THNDNDNT(0.983)S(0.015)ET(0.002)SK	8	SSNEVFLKTHNDNDNTSETSKIINMDDDIIK	PF13_0319
PF3D7_0322900	RPS3A	40S ribosomal protein S3A, putative	No	0.503088	1.11871	1.6218	1.21411	1.0233	1.61023	1.63336	PF3D7_0322900	87	S	___1	LS(1)CDHIINR	2	DLNNDEDQAHKKIKLSCDHIINRDCYTDFCG	MAL3P7.35;PFC1020c
PF3D7_1225800	UBA1	ubiquitin-activating enzyme E1	No	0.502923	-0.0372524	0.465671	-0.0156593	-0.0588455	0.448931	0.48241	PF3D7_1225800	384	S	___1	GLPENS(1)DEDALEK	6	LKWYELQNEKGLPENSDEDALEKIYNYAVTL	2277.t00249;MAL12P1.249;PFL1245w
PF3D7_1127800		conserved Plasmodium protein, unknown function	No	0.502478	0.770908	1.27339	0.769251	0.772566	1.14366	1.40311	PF3D7_1127800	836	S	___2	AIS(1)DDNQNK	3	NIMEDQNVVASEKAISDDNQNKNISKNIKKK	PF11_0289
PF3D7_1127800		conserved Plasmodium protein, unknown function	No	0.502478	0.770908	1.27339	0.769251	0.772566	1.14366	1.40311	PF3D7_1127800	831	S	___2	ISDITNIMEDQNVVAS(1)EKAIS(1)DDNQNK	16	ISDITNIMEDQNVVASEKAISDDNQNKNISK	PF11_0289
PF3D7_1227200	K1	potassium channel	Yes	0.502373	-1.36562	-0.86325	-1.26992	-1.46132	-0.727119	-0.99938	PF3D7_1227200	345	S	___1	DS(0.5)AS(0.5)LDNIQIFLGHR	2	FNINMNKDDDLMMKDSASLDNIQIFLGHRSS	2277.t00263;MAL12P1.263;PFL1315w
PF3D7_1138500	PPM2	protein phosphatase PPM2	No	0.502118	-2.08868	-1.58656	-1.93554	-2.24182	-1.64018	-1.53294	PF3D7_1138500	780	S	___1	FEEIPDDPNNSLDNT(0.132)ENS(0.732)EHMNT(0.132)NNNS(0.005)DQNEK	18	EIPDDPNNSLDNTENSEHMNTNNNSDQNEKL	PF11_0396
PF3D7_0624600	ISWI	SNF2 helicase, putative	No	0.502117	-1.86666	-1.36454	-1.4854	-2.24792	-1.18317	-1.54591	PF3D7_0624600	2102	S	___1	LTHFLSNQPLT(0.013)IS(0.221)S(0.762)DY(0.001)S(0.003)DT(0.001)KDIIEIR	14	AKLTHFLSNQPLTISSDYSDTKDIIEIRSDL	2270.t00132;MAL6P1.183;PFF1185w
PF3D7_0812500		RNA-binding protein, putative	No	0.501873	0.0413675	0.543241	0.22451	-0.141775	0.532721	0.553761	PF3D7_0812500	22	T	___2	LEEERS(1)NT(1)CEETEQVEETSNNK	8	RKKKSEERLEEERSNTCEETEQVEETSNNKR	PF08_0086
PF3D7_1471100	EXP2	exported protein 2	No	0.501587	3.98172	4.4833	4.03869	3.92475	4.54109	4.42552	PF3D7_1471100	216	S	___1	LKS(1)MESK	3	CTLKHLSSYMEEKLKSMESKKNIESGKYEFD	PF14_0678
PF3D7_1478600	PTP3	EMP1-trafficking protein	Yes	0.501468	-2.36728	-1.86581	-2.34226	-2.3923	-1.81639	-1.91523	PF3D7_1478600	481	T	___1	KGT(1)NPFMDEDELEELLR	3	DKTKLEDNTKQIKKGTNPFMDEDELEELLRL	PF14_0758
PF3D7_1460700	RPL27	60S ribosomal protein L27	No	0.500287	-2.16666	-1.66637	-2.15723	-2.17608	-1.75038	-1.58236	PF3D7_1460700	95	S	___1	YQVANDFDIKS(1)LAS(1)DDVLK	11	ILPTRYQVANDFDIKSLASDDVLKSKNKKKE	PF14_0579
PF3D7_1340600	DBR1	RNA lariat debranching enzyme, putative	No	0.499813	0.489673	0.989486	0.521311	0.458035	0.906931	1.07204	PF3D7_1340600	325	S	___1	TNTCNNNDHHNDDS(1)INLDYDHEK	14	TKTNTCNNNDHHNDDSINLDYDHEKALYELD	PF13_0222
PF3D7_1200700	ACS7	acyl-CoA synthetase	Yes	0.499263	3.87765	4.37691	3.92709	3.82821	4.44426	4.30957	PF3D7_1200700	771	S	___1	S(0.016)GS(0.984)KDDIK	3	KSDIKGGSKDDIKSGSKDDIKSGSKADIKSG	2277.t00007;MAL12P1.7;PFL0035c
PF3D7_1227700	KIC2	conserved Plasmodium protein, unknown function	No	0.498508	-0.517697	-0.0191889	-0.473989	-0.561405	-0.0474987	0.00912094	PF3D7_1227700	678	T	___2	NIT(0.534)IGS(0.466)LADT(1)EKR	3	ENSVYTSKKSYDKNITIGSLADTEKRSIKIK	2277.t00268;MAL12P1.268;PFL1340c
PF3D7_0500800	MESA	mature parasite-infected erythrocyte surface antigen	Yes	0.498437	2.09471	2.59315	2.20085	1.98857	2.53582	2.65048	PF3D7_0500800	355	S	___1	VSGPYENSENSNVT(0.001)S(0.999)ESEETK	15	KVSGPYENSENSNVTSESEETKKLAEKEENE	MAL5P1.9;PFE0040c
PF3D7_0815800	VPS9	vacuolar protein sorting-associated protein 9, putative	No	0.498397	2.5059	3.0043	2.58203	2.42978	2.9192	3.0894	PF3D7_0815800	303	S	___1	S(0.004)S(0.006)S(0.989)DFIQNEY(0.001)FK	3	NINNNNNSNNKQRSSSDFIQNEYFKTHNKTY	MAL8P1.82
PF3D7_1227700	KIC2	conserved Plasmodium protein, unknown function	No	0.498003	0.740402	1.23841	0.7332	0.747604	1.19677	1.28004	PF3D7_1227700	54	S	___1	ETNENIS(1)HLNYNEACPNSIIEK	7	EENIIDMKKETNENISHLNYNEACPNSIIEK	2277.t00268;MAL12P1.268;PFL1340c
PF3D7_1004400		RNA-binding protein, putative	No	0.497787	-2.54063	-2.04284	-2.48054	-2.60071	-2.14353	-1.94215	PF3D7_1004400	657	T	___2	S(0.469)S(0.531)EEVGEHT(0.562)NS(0.438)IINEDINK	9	NKKRILKSSEEVGEHTNSIINEDINKDQTDI	PF10_0047
PF3D7_0935900	REX1	ring-exported protein 1	Yes	0.497232	-1.29436	-0.797124	-1.27523	-1.31348	-0.862019	-0.732229	PF3D7_0935900	569	S	___1	TENQS(1)GELLTQAEK	5	KPQAEKDALAKTENQSGELLTQAEKDALAKK	PFI1735c
PF3D7_1110400		RNA-binding protein, putative	No	0.496392	-2.0321	-1.5357	-1.91624	-2.14795	-1.60334	-1.46807	PF3D7_1110400	1039	S	___1	KTTDETENNNVENNEANGDS(1)NANAASGK	20	ETENNNVENNEANGDSNANAASGKSQKIDIL	PF11_0111
PF3D7_1411500		conserved Plasmodium protein, unknown function	No	0.496302	-3.62361	-3.12731	-3.44221	-3.80501	-3.42499	-2.82962	PF3D7_1411500	458	S	___2	IET(0.247)QS(0.75)INS(0.999)VNDT(0.004)Y(0.001)LLNR	5	IVERENEMNNKIETQSINSVNDTYLLNRKNE	PF14_0113
PF3D7_1411500		conserved Plasmodium protein, unknown function	No	0.496302	-3.62361	-3.12731	-3.44221	-3.80501	-3.42499	-2.82962	PF3D7_1411500	461	S	___2	IET(0.247)QS(0.75)INS(0.999)VNDT(0.004)Y(0.001)LLNR	8	RENEMNNKIETQSINSVNDTYLLNRKNENNM	PF14_0113
PF3D7_1339300		conserved Plasmodium protein, unknown function	No	0.496017	0.0728273	0.568845	0.0881805	0.0574741	0.62998	0.50771	PF3D7_1339300	115	T	___1	S(0.024)FS(0.025)Y(0.022)S(0.099)EES(0.202)KT(0.664)CS(0.716)DNT(0.245)HNEDGS(0.004)K	10	IKKELKSFSYSEESKTCSDNTHNEDGSKKQN	PF13_0215
PF3D7_0716000		RNA-binding protein, putative	No	0.495837	-2.71183	-2.21599	-2.63176	-2.79189	-2.16363	-2.26835	PF3D7_0716000	90	S	___1	NS(1)QNEEMNNDNKNNDNDDQDDEHNSK	2	YNNEDGNIIKKKKKNSQNEEMNNDNKNNDND	PF07_0066
PF3D7_0606000	KIC1	conserved Plasmodium protein, unknown function	No	0.495502	0.615728	1.11123	0.743052	0.488405	1.11908	1.10338	PF3D7_0606000	737	S	___1	IEDVCS(0.002)LS(0.998)KEEEDALINIDR	8	HEKKKEIKIEDVCSLSKEEEDALINIDRNHV	2270.t00255;MAL6P1.63;PFF0295c
PF3D7_1140700		conserved Plasmodium protein, unknown function	No	0.495428	1.15869	1.65412	1.22145	1.09592	1.60036	1.70787	PF3D7_1140700	82	Y	___1	NY(0.579)DS(0.421)DENTWEPFENLSPNLK	2	DENLDDFEFYIKWKNYDSDENTWEPFENLSP	PF11_0418
PF3D7_0921600		tetratricopeptide repeat protein, putative	No	0.495043	-3.55431	-3.05927	-3.3489	-3.75973	-3.01632	-3.10222	PF3D7_0921600	1620	S	___1	NIINVEEENS(0.991)S(0.991)FEES(0.018)R	11	TPSNKNIINVEEENSSFEESRNYESSDNSSD	PFI1060w
PF3D7_1149000	Pf332	antigen 332, DBL-like protein	Yes	0.494682	0.424377	0.91906	0.54401	0.304745	0.99012	0.848	PF3D7_1149000	3066	S	___1	EGS(0.987)AT(0.013)EEIVQDGSGTNDFVGK	3	IRDETNVEEVLEKEGSATEEIVQDGSGTNDF	PF11_0506;PF11_0507
PF3D7_1345400		conserved Plasmodium protein, unknown function	No	0.494553	-0.779757	-0.285205	-0.65481	-0.904705	-0.45985	-0.110559	PF3D7_1345400	244	S	___2	HQNS(1)DDKNDDDS(1)LNDNPDNDYGANDDKENNR	4	SDDDINNIYDEKHQNSDDKNDDDSLNDNPDN	MAL13P1.226
PF3D7_1345400		conserved Plasmodium protein, unknown function	No	0.494553	-0.779757	-0.285205	-0.65481	-0.904705	-0.45985	-0.110559	PF3D7_1345400	252	S	___2	HQNS(1)DDKNDDDS(1)LNDNPDNDYGANDDKENNR	12	YDEKHQNSDDKNDDDSLNDNPDNDYGANDDK	MAL13P1.226
PF3D7_0500800	MESA	mature parasite-infected erythrocyte surface antigen	Yes	0.494409	-1.43325	-0.938839	-1.46373	-1.40277	-0.896639	-0.981039	PF3D7_0500800	348	S	___2	VS(0.001)GPY(0.004)ENS(0.931)ENS(0.851)NVT(0.172)S(0.04)ES(0.002)EETKK	8	SKDREGNKVSGPYENSENSNVTSESEETKKL	MAL5P1.9;PFE0040c
PF3D7_0500800	MESA	mature parasite-infected erythrocyte surface antigen	Yes	0.494409	-1.43325	-0.938839	-1.46373	-1.40277	-0.896639	-0.981039	PF3D7_0500800	351	S	___2	VSGPY(0.002)ENS(0.894)ENS(0.887)NVT(0.492)S(0.517)ES(0.105)EET(0.104)KK	11	REGNKVSGPYENSENSNVTSESEETKKLAEK	MAL5P1.9;PFE0040c
PF3D7_0110400	RPB9	DNA-directed RNA polymerase II subunit RPB9, putative	No	0.494292	-3.0603	-2.566	-3.21525	-2.90534	-2.63113	-2.50088	PF3D7_0110400	130	S	___1	EAQQINDDNY(0.003)FNS(0.997)EK	13	WEKEAQQINDDNYFNSEKSSDISEDQDLLNN	MAL1P2.30;PFA0505c
PF3D7_0500800	MESA	mature parasite-infected erythrocyte surface antigen	Yes	0.493937	-3.41305	-2.91911	-3.1615	-3.66459	-2.94536	-2.89286	PF3D7_0500800	431	S	___1	KS(1)FFQMLGCNFLCNK	2	EKKADNKKKSKKKKKSFFQMLGCNFLCNKNI	MAL5P1.9;PFE0040c
PF3D7_1308200	cpsSII	carbamoyl phosphate synthetase	No	0.493798	-1.22769	-0.733894	-1.05986	-1.39552	-0.7335	-0.734289	PF3D7_1308200	1373	S	___2	EEKS(1)IGS(0.995)DDT(0.006)NILSAQNSNNNFSCNNENMNK	4	SERAGSHHIYGKEEKSIGSDDTNILSAQNSN	PF13_0044
PF3D7_1308200	cpsSII	carbamoyl phosphate synthetase	No	0.493798	-1.22769	-0.733894	-1.05986	-1.39552	-0.7335	-0.734289	PF3D7_1308200	1376	S	___2	EEKS(1)IGS(0.995)DDT(0.006)NILSAQNSNNNFSCNNENMNK	7	AGSHHIYGKEEKSIGSDDTNILSAQNSNNNF	PF13_0044
PF3D7_0209100	PATPL1	phospholipase A2, putative	No	0.493773	-3.33557	-2.84179	-3.1837	-3.48744	-2.71861	-2.96498	PF3D7_0209100	218	S	___2	YNLDQTDILLDDS(1)NS(1)ERRR	13	ICKYNLDQTDILLDDSNSERRRNSKFKIKNT	PF02_0087;PFB0410c
PF3D7_0209100	PATPL1	phospholipase A2, putative	No	0.493773	-3.33557	-2.84179	-3.1837	-3.48744	-2.71861	-2.96498	PF3D7_0209100	220	S	___2	YNLDQTDILLDDS(1)NS(1)ERRR	15	KYNLDQTDILLDDSNSERRRNSKFKIKNTNY	PF02_0087;PFB0410c
PF3D7_0936800		Plasmodium exported protein (PHISTc), unknown function	Yes	0.493354	1.94149	2.43485	2.03413	1.84885	2.34937	2.52032	PF3D7_0936800	87	S	___1	SLS(1)DEINK	3	SHSTSDPKKNEEKSLSDEINKCDMKKYTAEE	PFI1780w
PF3D7_0402400	GEXP18	Plasmodium exported protein, unknown function	Yes	0.493027	1.62043	2.11345	1.5591	1.68176	2.16703	2.05988	PF3D7_0402400	166	S	___1	LDELKS(1)YINTNDDENQK	6	INEKNRNNDKLDELKSYINTNDDENQKKLWN	MAL4P1.23;PFD0115c
PF3D7_1445700		conserved Plasmodium protein, unknown function	No	0.492188	-2.89029	-2.3981	-3.01133	-2.76925	-2.04839	-2.74782	PF3D7_1445700	303	S	___1	S(0.516)Y(0.394)RS(0.09)FKK	1	LEEGGRVDRLPGFRRSYRSFKKVDEGNWNNK	PF14_0434
PF3D7_0825500	KRI1	protein KRI1, putative	No	0.492048	-1.72636	-1.23431	-1.71581	-1.73691	-1.22824	-1.24038	PF3D7_0825500	215	S	___1	EGS(1)QAFEKEEEELLNK	3	LNYSEYYKDILLKEGSQAFEKEEEELLNKEK	PF08_0026
PF3D7_1115800		conserved Plasmodium protein, unknown function	No	0.491807	-0.00771713	0.48409	0.155521	-0.170956	0.56296	0.40522	PF3D7_1115800	241	S	___1	NVVS(0.999)EEQS(0.001)INKDTK	4	TDASIKKNEKVKNVVSEEQSINKDTKKTDTK	PF11_0166
PF3D7_0610200	RBM25	RNA-binding protein 25, putative	No	0.490948	-3.94217	-3.45122	-3.86098	-4.02336	-3.4491	-3.45334	PF3D7_0610200	780	T	___1	NFHSEYLQNINDQSTLNILDT(0.995)NDEYT(0.004)YLEEK	21	YLQNINDQSTLNILDTNDEYTYLEEKGKKTN	2270.t00212;MAL6P1.105;PFF0505c
PF3D7_1466900		rhoptry protein, putative	No	0.489887	-1.70864	-1.21875	-1.60484	-1.81244	-1.2496	-1.18791	PF3D7_1466900	1176	S	___1	NLNIS(0.971)QNDEVS(0.028)ENKNIY(0.001)FNLFFGK	5	NVNVVSNEQFKNLNISQNDEVSENKNIYFNL	PF14_0637
PF3D7_0934800	PKAc	cAMP-dependent protein kinase catalytic subunit	No	0.489463	-3.23817	-2.74871	-3.39553	-3.08082	-2.65325	-2.84417	PF3D7_0934800	266	S	___1	LLS(1)HDLTK	3	KFLDNNCKHLMKKLLSHDLTKRYGNLKKGAQ	PFI1685w
PF3D7_0215300	ACS8	acyl-CoA synthetase	Yes	0.488442	-0.200413	0.28803	-0.2286	-0.172226	0.37756	0.1985	PF3D7_0215300	855	S	___1	S(0.955)T(0.044)DAS(0.001)LKIPEK	1	QQNNMSNITLKNTLKSTDASLKIPEKNKVQT	PF02_0144;PFB0695c
PF3D7_1312800		conserved Plasmodium protein, unknown function	No	0.487957	-3.69002	-3.20206	-3.57777	-3.80227	-3.34901	-3.05512	PF3D7_1312800	1870	S	___2	S(0.001)VQGIY(0.037)T(0.036)NDIILHS(0.634)FS(0.634)DES(0.634)DLEEGY(0.024)EQK	14	NKSVQGIYTNDIILHSFSDESDLEEGYEQKN	PF13_0072
PF3D7_1312800		conserved Plasmodium protein, unknown function	No	0.487957	-3.69002	-3.20206	-3.57777	-3.80227	-3.34901	-3.05512	PF3D7_1312800	1872	S	___2	S(0.001)VQGIY(0.037)T(0.036)NDIILHS(0.634)FS(0.634)DES(0.634)DLEEGY(0.024)EQK	16	SVQGIYTNDIILHSFSDESDLEEGYEQKNKT	PF13_0072
PF3D7_1312800		conserved Plasmodium protein, unknown function	No	0.487957	-3.69002	-3.20206	-3.57777	-3.80227	-3.34901	-3.05512	PF3D7_1312800	1875	S	___2	S(0.001)VQGIY(0.037)T(0.036)NDIILHS(0.634)FS(0.634)DES(0.634)DLEEGY(0.024)EQK	19	GIYTNDIILHSFSDESDLEEGYEQKNKTYNN	PF13_0072
PF3D7_0511300		MORN repeat protein, putative	No	0.487742	-1.24187	-0.754129	-1.13524	-1.34851	-0.67141	-0.836849	PF3D7_0511300	705	S	___1	ENYS(1)EELNFIKDR	4	DDEDDIYIINLKENYSEELNFIKDRERLESY	MAL5P1.113;PFE0560c
PF3D7_1328000		conserved Plasmodium protein, unknown function	No	0.487652	-1.66107	-1.17342	-1.68794	-1.6342	-1.23671	-1.11013	PF3D7_1328000	1914	S	___1	NDDS(0.5)ES(0.5)NHNCYNNYK	4	DEKYKNNNNNYRNDDSESNHNCYNNYKGYNN	MAL13P1.151
PF3D7_1328000		conserved Plasmodium protein, unknown function	No	0.487652	-1.66107	-1.17342	-1.68794	-1.6342	-1.23671	-1.11013	PF3D7_1328000	1916	S	___1	NDDS(0.5)ES(0.5)NHNCYNNYK	6	KYKNNNNNYRNDDSESNHNCYNNYKGYNNDT	MAL13P1.151
PF3D7_1356000		conserved Plasmodium protein, unknown function	No	0.487528	-0.871227	-0.383699	-0.80225	-0.940205	-0.295099	-0.4723	PF3D7_1356000	1127	S	___1	T(0.001)CS(0.999)LNVIGGFLK	3	TFVKNKRGHILRKTCSLNVIGGFLKSKEKFI	PF13_0298
PF3D7_1125800		kelch domain-containing protein, putative	No	0.487178	-0.741922	-0.254745	-0.91844	-0.565405	0.18329	-0.69278	PF3D7_1125800	591	S	___1	LETSNVLMKHDS(1)I	12	RIRKLETSNVLMKHDSI______________	PF11_0268
PF3D7_1123900	SNU13	splicing factor, putative	No	0.486913	-2.55104	-2.06413	-2.78367	-2.31841	-2.27749	-1.85077	PF3D7_1123900	10	S	___1	S(0.02)NT(0.02)LIS(0.052)NES(0.934)VHNS(0.974)EVEEEEEEINAK	9	______MSNTLISNESVHNSEVEEEEEEINA	PF11_0250
PF3D7_0702500		Plasmodium exported protein, unknown function	Yes	0.486903	-2.79747	-2.31056	-2.79415	-2.80079	-2.36334	-2.25779	PF3D7_0702500	146	T	___2	NNS(0.059)DGS(0.416)T(0.525)ENHLSGSNSDGR	7	GQKESQLYKNNSDGSTENHLSGSNSDGRNSS	PF07_0008
PF3D7_0209800	UAP56	ATP-dependent RNA helicase UAP56	No	0.486543	-1.62109	-1.13455	-1.62839	-1.61379	-1.09731	-1.17179	PF3D7_0209800	73	S	___1	AIS(0.157)ES(0.746)GFEHPS(0.098)EVQQETIPAAITGTDILCQAK	5	KDFFLKPELLRAISESGFEHPSEVQQETIPA	PF02_0093;PFB0445c
PF3D7_1442400	KIC9	conserved Plasmodium protein, unknown function	No	0.485433	-2.69728	-2.21184	-2.53378	-2.86077	-2.36276	-2.06093	PF3D7_1442400	1794	S	___2	FLY(0.008)FAVPLMS(0.902)QDKS(0.904)CDY(0.186)NINDEEKNK	10	FSNNQKFLYFAVPLMSQDKSCDYNINDEEKN	PF14_0402
PF3D7_1442400	KIC9	conserved Plasmodium protein, unknown function	No	0.485433	-2.69728	-2.21184	-2.53378	-2.86077	-2.36276	-2.06093	PF3D7_1442400	1798	S	___2	FLY(0.008)FAVPLMS(0.902)QDKS(0.904)CDY(0.186)NINDEEKNK	14	QKFLYFAVPLMSQDKSCDYNINDEEKNKEIK	PF14_0402
PF3D7_1447900	MDR2	multidrug resistance protein 2	No	0.485387	-0.193077	0.29231	-0.398849	0.0126953	0.41477	0.169849	PF3D7_1447900	300	S	___1	RYGS(1)NK	4	NKIDVKESFLNKRYGSNKRSSKIYDNNNNNN	PF14_0455
PF3D7_1140700		conserved Plasmodium protein, unknown function	No	0.485052	-0.474707	0.0103455	-0.622019	-0.327394	-0.01017	0.0308609	PF3D7_1140700	1000	S	___1	SYS(1)NNSAYVNR	3	GKNIVKNLFCNKKSYSNNSAYVNRGISEYAE	PF11_0418
PF3D7_1039000	FIKK10.2	serine/threonine protein kinase, FIKK family	Yes	0.484776	-0.443892	0.040885	-0.382769	-0.505014	-0.0826893	0.164459	PF3D7_1039000	151	Y	___1	KGKS(0.001)NLY(0.999)HNGK	7	RRGKLREKKKGKSNLYHNGKNKKNVSNCKKH	PF10_0380
PF3D7_0401800	PfD80	Plasmodium exported protein (PHISTb), unknown function	Yes	0.483723	-1.44612	-0.962399	-1.40564	-1.4866	-1.14132	-0.78348	PF3D7_0401800	316	S	___1	EAES(1)VDDNNKEGNES(0.98)DNIY(0.004)CMLCS(0.006)S(0.006)NT(0.005)R	4	GSNVDITEEEEKEAESVDDNNKEGNESDNIY	MAL4P1.16;PFD0080c
PF3D7_1365800		conserved Plasmodium protein, unknown function	No	0.483657	0.133958	0.617615	0.248781	0.0191345	0.61944	0.615789	PF3D7_1365800	14	S	___1	KS(0.049)S(0.902)ES(0.049)LKEDDEFFLER	3	__MKAFVNKIQFRKSSESLKEDDEFFLERKQ	MAL13P1.330
PF3D7_1004400		RNA-binding protein, putative	No	0.483633	-2.24803	-1.76439	-2.10799	-2.38807	-1.46714	-2.06165	PF3D7_1004400	421	S	___1	SHFHLKVS(1)R	8	YGYKNDNRSHFHLKVSRNYSPPNFSNESIER	PF10_0047
PF3D7_1248700		conserved Plasmodium protein, unknown function	No	0.482168	0.108482	0.590651	0.20957	0.00739479	0.562141	0.61916	PF3D7_1248700	1159	S	___1	NAQKGS(1)VDDLEAWK	6	NDRSFRLAARNAQKGSVDDLEAWKLNEGSLG	2277.t00467;MAL12P1.466;PFL2335w
PF3D7_1333800		conserved Plasmodium protein, unknown function	No	0.482147	-2.0734	-1.59125	-2.13974	-2.00706	-1.55595	-1.62655	PF3D7_1333800	29	S	___1	GDFEPVLY(0.009)KGS(0.933)DIEFIY(0.058)NK	11	ISLEKGDFEPVLYKGSDIEFIYNKLNLGEGK	PF13_0186
PF3D7_0708400	HSP90	heat shock protein 90	No	0.481732	6.03512	6.51685	6.0638	6.00644	6.49421	6.53949	PF3D7_0708400	220	S	___2	QNEKEIT(1)AS(1)EEEEGEGEGEREGEEEEEK	9	IKLYCERQNEKEITASEEEEGEGEGEREGEE	PF07_0029
PF3D7_0708400	HSP90	heat shock protein 90	No	0.481732	6.03512	6.51685	6.0638	6.00644	6.49421	6.53949	PF3D7_0708400	218	T	___2	QNEKEIT(1)AS(1)EEEEGEGEGEREGEEEEEK	7	FPIKLYCERQNEKEITASEEEEGEGEGEREG	PF07_0029
PF3D7_1033700	BDP1	bromodomain protein 1	No	0.481717	1.54246	2.02418	1.47886	1.60607	2.01047	2.03789	PF3D7_1033700	19	S	___1	S(0.006)IREDS(0.994)LDDVLK	6	EDFNTLPLIKSIREDSLDDVLKFLENNYKDY	PF10_0328
PF3D7_1438400	MCA2	metacaspase-like protein	No	0.480727	0.994923	1.47565	1.10203	0.887815	1.5289	1.4224	PF3D7_1438400	1302	S	___2	IKS(0.999)VHY(0.001)DMDEILS(1)LK	3	CLDINNKEKKKKKIKSVHYDMDEILSLKCKV	PF14_0362;PF14_0363
PF3D7_1438400	MCA2	metacaspase-like protein	No	0.480727	0.994923	1.47565	1.10203	0.887815	1.5289	1.4224	PF3D7_1438400	1312	S	___2	SVHYDMDEILS(1)LK	11	KKKIKSVHYDMDEILSLKCKVYDELDTCLKC	PF14_0362;PF14_0363
PF3D7_1149000	Pf332	antigen 332, DBL-like protein	Yes	0.480567	1.51673	1.9973	1.60117	1.43229	2.00639	1.9882	PF3D7_1149000	759	S	___1	SVS(1)EEIPVEEK	3	GQLINEEKPVEEKSVSEEIPVEEKSVSEEIP	PF11_0506;PF11_0507
PF3D7_1134600		zinc finger protein, putative	No	0.479737	-3.03353	-2.5538	-2.78359	-3.28347	-2.45355	-2.65404	PF3D7_1134600	1164	S	___1	KILET(0.089)LS(0.911)HGK	7	KEKYNEKEKKILETLSHGKMEKHKKNKIVLG	PF11_0357
PF3D7_1342900	ApiAP2	AP2 domain transcription factor, putative	No	0.478184	2.24254	2.72073	2.25465	2.23043	2.65618	2.78527	PF3D7_1342900	3536	S	___1	KSIPLCFS(1)DDEEAKEINDK	8	ITYKKNDKKSIPLCFSDDEEAKEINDKIKKK	PF13_0235
PF3D7_1140700		conserved Plasmodium protein, unknown function	No	0.477558	-0.158117	0.319441	-0.0917492	-0.224485	0.301071	0.337811	PF3D7_1140700	1610	S	___1	SEQDHINDDDNNINS(0.999)Y(0.001)DDESDVNFNNKK	15	RSEQDHINDDDNNINSYDDESDVNFNNKKND	PF11_0418
PF3D7_0708800	HSP110c	heat shock protein 110	No	0.477458	0.758798	1.23626	0.79426	0.723335	1.19309	1.27942	PF3D7_0708800	868	S	___2	NNEEKENSTKNENS(1)ANPEE	14	AKNNEEKENSTKNENSANPEE__________	PF07_0033
PF3D7_1107300	PAIP1	polyadenylate-binding protein-interacting protein 1, putative	No	0.477023	3.55962	4.03665	3.67855	3.44069	4.02146	4.05183	PF3D7_1107300	2060	S	___2	VS(1)DYS(1)NEKNNVR	2	KDEKNLDNYTYNEKVSDYSNEKNNVREDLHE	PF11_0086
PF3D7_0606000	KIC1	conserved Plasmodium protein, unknown function	No	0.476924	1.29352	1.77044	1.2607	1.32633	1.67862	1.86226	PF3D7_0606000	863	S	___1	NDS(1)VMGYREEIK	3	HPDFVEKYLQNKKNDSVMGYREEIKISDEQK	2270.t00255;MAL6P1.63;PFF0295c
PF3D7_0702500		Plasmodium exported protein, unknown function	Yes	0.476868	-0.317448	0.15942	-0.34321	-0.291685	0.20558	0.11326	PF3D7_0702500	145	S	___1	NNS(1)DGS(0.961)T(0.039)ENHLSGSNSDGR	6	DGQKESQLYKNNSDGSTENHLSGSNSDGRNS	PF07_0008
PF3D7_0801000		Plasmodium exported protein (PHISTc), unknown function	Yes	0.476703	-0.727653	-0.25095	-0.65136	-0.803946	-0.390289	-0.11161	PF3D7_0801000	525	S	___1	SNFDERS(1)QIVEQR	7	GRSQNLEGRSNFDERSQIVEQRRNFDDRDQN	PF08_0137
PF3D7_0202000	KAHRP	knob-associated histidine-rich protein	Yes	0.476668	-1.29861	-0.821944	-1.40799	-1.18924	-0.732969	-0.910919	PF3D7_0202000	469	S	___1	S(0.833)DGS(0.167)KAHEK	1	TNEENKNKEKTNNSKSDGSKAHEKKENETKN	PF02_0020;PFB0100c
PF3D7_1473700	NUP116	nucleoporin NUP116/NSP116, putative	No	0.476638	1.16231	1.63895	1.17378	1.15084	1.63249	1.64541	PF3D7_1473700	10	T	___1	LS(0.071)NVIT(0.848)S(0.081)NK	6	______MSRKLSNVITSNKGNSMELFVNVLN	PF14_0706
PF3D7_1107800	ApiAP2	AP2 domain transcription factor, putative	No	0.476192	1.74208	2.21828	1.80816	1.676	2.19082	2.24573	PF3D7_1107800	889	S	___1	KS(0.001)CNYS(0.999)DENILNK	6	SAVSSGAYHKKSCNYSDENILNKLNVSIDYS	PF11_0091
PF3D7_1107300	PAIP1	polyadenylate-binding protein-interacting protein 1, putative	No	0.475657	3.60346	4.07912	3.71964	3.48729	4.06479	4.09345	PF3D7_1107300	2063	S	___2	VSDYS(1)NEKNNVR	5	KNLDNYTYNEKVSDYSNEKNNVREDLHEDLH	PF11_0086
PF3D7_1248500		bax inhibitor 1, putative	No	0.475628	0.632612	1.10824	0.57019	0.695034	1.07387	1.14261	PF3D7_1248500	27	S	___1	NSIVGQNYGAAYNQGGYNYS(1)QNKDKENYDK	20	GQNYGAAYNQGGYNYSQNKDKENYDKSNSGQ	2277.t00465;MAL12P1.464;PFL2325c
PF3D7_1356000		conserved Plasmodium protein, unknown function	No	0.474507	0.639668	1.11417	0.56587	0.713465	1.09292	1.13543	PF3D7_1356000	1217	S	___1	MYS(1)HEALSAYTNK	3	MLNNNKTKPLGHKMYSHEALSAYTNKYDNDI	PF13_0298
PF3D7_1022400	SRSF4	serine/arginine-rich splicing factor 4	No	0.474427	-0.694992	-0.220565	-0.68372	-0.706264	-0.164919	-0.276211	PF3D7_1022400	294	S	___1	SGDRS(0.999)YR	5	VSRSRSDHGSRSGDRSYRKKKNKNESSSDVL	PF10_0217
PF3D7_0404600		conserved Plasmodium membrane protein, unknown function	No	0.474147	-1.57266	-1.09852	-1.58109	-1.56424	-1.09679	-1.10024	PF3D7_0404600	2036	S	___1	FS(0.55)DDS(0.45)DHVDEK	2	RIFISLNNYLKNFKFSDDSDHVDEKHMDDTS	MAL4P1.44;PFD0220c;PFD0220w;PFD0225w
PF3D7_0730900	PTP4	EMP1-trafficking protein	Yes	0.473962	2.13682	2.61078	2.22829	2.04535	2.55666	2.66491	PF3D7_0730900	1677	S	___1	S(0.002)FS(0.979)S(0.018)QGIREDFPYENENNK	3	GMKGQKYGSKNIRSFSSQGIREDFPYENENN	MAL7P1.171
PF3D7_1468100		conserved Plasmodium protein, unknown function	No	0.473778	-1.40883	-0.935055	-1.45366	-1.36401	-1.0174	-0.852711	PF3D7_1468100	2432	S	___2	NAQS(1)PNNDNDQNEVVGANEREDDSTNR	4	ENAQSEKEGKGKNAQSPNNDNDQNEVVGANE	PF14_0649
PF3D7_1468100		conserved Plasmodium protein, unknown function	No	0.473778	-1.40883	-0.935055	-1.45366	-1.36401	-1.0174	-0.852711	PF3D7_1468100	2452	S	___2	NAQSPNNDNDQNEVVGANEREDDS(0.959)T(0.041)NR	24	NDQNEVVGANEREDDSTNRNYNNGKSSNEEE	PF14_0649
PF3D7_1118600	MYST	histone acetyltransferase	No	0.473723	-2.01459	-1.54087	-1.57637	-2.45282	-1.35023	-1.73151	PF3D7_1118600	110	S	___1	S(0.005)DNNNNKS(0.981)DNNNNKS(0.014)DNYNNK	8	NDNNNNNKSDNNNNKSDNNNNKSDNYNNKIG	PF11_0192
PF3D7_1123900	SNU13	splicing factor, putative	No	0.472618	1.63727	2.10989	1.74798	1.52655	2.03852	2.18125	PF3D7_1123900	14	S	___1	SNTLIS(0.128)NES(0.873)VHNS(0.999)EVEEEEEEINAK	13	__MSNTLISNESVHNSEVEEEEEEINAKIFP	PF11_0250
PF3D7_0401800	PfD80	Plasmodium exported protein (PHISTb), unknown function	Yes	0.472288	0.729608	1.2019	0.791361	0.667854	1.12914	1.27465	PF3D7_0401800	183	S	___3	SASTASTASAASAAS(0.962)T(0.036)T(0.001)R	15	RSASTASTASAASAASTTRSASAASTTRSAS	MAL4P1.16;PFD0080c
PF3D7_1359400	CELF1	CUGBP Elav-like family member 1	No	0.472232	1.86955	2.34178	2.05406	1.68504	2.3188	2.36476	PF3D7_1359400	59	S	___2	S(0.628)S(0.668)S(0.633)DKDENT(0.065)IDY(0.005)GNHDFPCNPAPPVPIK	1	ENLKSSKGKQENNTKSSSDKDENTIDYGNHD	PF13_0315
PF3D7_1359400	CELF1	CUGBP Elav-like family member 1	No	0.472232	1.86955	2.34178	2.05406	1.68504	2.3188	2.36476	PF3D7_1359400	60	S	___2	S(0.628)S(0.668)S(0.633)DKDENT(0.065)IDY(0.005)GNHDFPCNPAPPVPIK	2	NLKSSKGKQENNTKSSSDKDENTIDYGNHDF	PF13_0315
PF3D7_1359400	CELF1	CUGBP Elav-like family member 1	No	0.472232	1.86955	2.34178	2.05406	1.68504	2.3188	2.36476	PF3D7_1359400	61	S	___2	S(0.628)S(0.668)S(0.633)DKDENT(0.065)IDY(0.005)GNHDFPCNPAPPVPIK	3	LKSSKGKQENNTKSSSDKDENTIDYGNHDFP	PF13_0315
PF3D7_1347700	ECT	ethanolamine-phosphate cytidylyltransferase	No	0.471778	3.62628	4.09806	3.61906	3.6335	4.00756	4.18856	PF3D7_1347700	364	S	___1	VS(1)EQQHDIDTLPK	2	YNSELGISDDNKTKVSEQQHDIDTLPKNLLN	PF13_0253
PF3D7_0106300	ATP6	calcium-transporting ATPase	No	0.471738	3.70375	4.17549	3.71908	3.68843	4.17261	4.17837	PF3D7_0106300	492	S	___1	GS(1)KILEDK	2	LKEMKSNENTIISRGSKILEDKINKYCYSEY	MAL1P1.54;PFA0310c
PF3D7_1303800		conserved Plasmodium protein, unknown function	No	0.471377	-2.39641	-1.92503	-2.37111	-2.42171	-1.89277	-1.95729	PF3D7_1303800	1607	S	___2	YMSPYECLLS(0.01)IS(0.2)S(0.594)S(0.616)S(0.579)K	13	KYKYMSPYECLLSISSSSKVKKCNIIDLHEK	MAL13P1.19
PF3D7_1303800		conserved Plasmodium protein, unknown function	No	0.471377	-2.39641	-1.92503	-2.37111	-2.42171	-1.89277	-1.95729	PF3D7_1303800	1608	S	___2	YMSPYECLLS(0.01)IS(0.2)S(0.594)S(0.616)S(0.579)K	14	YKYMSPYECLLSISSSSKVKKCNIIDLHEKN	MAL13P1.19
PF3D7_1303800		conserved Plasmodium protein, unknown function	No	0.471377	-2.39641	-1.92503	-2.37111	-2.42171	-1.89277	-1.95729	PF3D7_1303800	1609	S	___2	YMSPYECLLS(0.01)IS(0.2)S(0.594)S(0.616)S(0.579)K	15	KYMSPYECLLSISSSSKVKKCNIIDLHEKNN	MAL13P1.19
PF3D7_0501400	FIRA	interspersed repeat antigen	Yes	0.471337	0.718113	1.18945	0.821171	0.615055	1.1084	1.2705	PF3D7_0501400	685	S	___2	KAS(0.014)EGDNIS(0.983)LS(0.947)S(0.949)LS(0.106)EET(0.001)QEK	11	HADEKKASEGDNISLSSLSEETQEKSHTKKK	MAL5P1.15;PFE0070w
PF3D7_1027100	MPP10	U3 small nucleolar ribonucleoprotein protein MPP10, putative	No	0.470512	-1.03037	-0.559855	-0.910589	-1.15014	-0.602789	-0.51692	PF3D7_1027100	409	S	___2	LS(0.999)DNEKDS(0.87)LS(0.131)NEFNDNKK	2	IEQDIYEINQFDSRLSDNEKDSLSNEFNDNK	PF10_0266
PF3D7_1027100	MPP10	U3 small nucleolar ribonucleoprotein protein MPP10, putative	No	0.470512	-1.03037	-0.559855	-0.910589	-1.15014	-0.602789	-0.51692	PF3D7_1027100	415	S	___2	LS(0.999)DNEKDS(0.87)LS(0.131)NEFNDNKK	8	EINQFDSRLSDNEKDSLSNEFNDNKKTDDVQ	PF10_0266
PF3D7_1219600	ATPase2	aminophospholipid-transporting P-ATPase	No	0.470372	0.812938	1.28331	0.799631	0.826244	1.25872	1.3079	PF3D7_1219600	325	S	___1	LS(0.019)S(0.981)VDLSK	3	KKTTEEIEYRKKRLSSVDLSKSSSAIGSNLC	2277.t00190;MAL12P1.190;PFL0950c
PF3D7_1119300	U2AF1	splicing factor U2AF small subunit, putative	No	0.470303	2.16678	2.63709	2.1752	2.15837	2.59719	2.67698	PF3D7_1119300	240	S	___2	S(1)DNEDDDDDEER	1	DRRSSHHYSSKRKNRSDNEDDDDDEERSYKH	PF11_0200
PF3D7_1119300	U2AF1	splicing factor U2AF small subunit, putative	No	0.470303	2.16678	2.63709	2.1752	2.15837	2.59719	2.67698	PF3D7_1119300	252	S	___2	NRS(1)DNEDDDDDEERS(1)YK	15	KNRSDNEDDDDDEERSYKHARRENSAERREK	PF11_0200
PF3D7_1011800	PREBP	PRE-binding protein	No	0.470197	1.91452	2.38472	1.91895	1.91009	2.33135	2.43808	PF3D7_1011800	644	S	___1	GS(0.932)KNS(0.068)DIEEAEEKLNEILK	2	NYDAKTFDASATIKGSKNSDIEEAEEKLNEI	PF10_0115
PF3D7_1006100	NOT5	CCR4-NOT transcription complex subunit 5, putative	No	0.469947	-1.67202	-1.20208	-1.72228	-1.62177	-1.23633	-1.16782	PF3D7_1006100	22	S	___1	KDNET(0.104)MS(0.896)LAAENMLENNFFK	7	NSYKKDKKKKDNETMSLAAENMLENNFFKLQ	PF10_0062
PF3D7_0401800	PfD80	Plasmodium exported protein (PHISTb), unknown function	Yes	0.469778	2.25098	2.72076	2.26977	2.23219	2.62374	2.81778	PF3D7_0401800	147	S	___3	S(0.002)AS(0.016)AAS(0.975)T(0.961)T(0.952)RS(0.092)AS(0.046)AAS(0.836)T(0.106)T(0.015)R	15	RSASAASTTRSASAASTTRSASAASTTRSAS	MAL4P1.16;PFD0080c
PF3D7_0704600	UT	E3 ubiquitin-protein ligase	No	0.469228	0.570713	1.03994	0.756981	0.384445	1.22273	0.857151	PF3D7_0704600	3335	S	___2	NINS(1)DKGEDSEKNVSK	4	QKGKLKKSTIKKNINSDKGEDSEKNVSKLNE	MAL7P1.19
PF3D7_0704600	UT	E3 ubiquitin-protein ligase	No	0.469228	0.570713	1.03994	0.756981	0.384445	1.22273	0.857151	PF3D7_0704600	3341	S	___2	NINSDKGEDS(1)EKNVSK	10	KSTIKKNINSDKGEDSEKNVSKLNETKEKEV	MAL7P1.19
PF3D7_1033600	CEF1	myb2 transcription factor, putative	No	0.468518	-0.950727	-0.482209	-1.09422	-0.807236	-0.570259	-0.394159	PF3D7_1033600	732	S	___1	DDSNIDGCDEKS(1)DNIDGCDEK	12	NNTKDDSNIDGCDEKSDNIDGCDEKSDTTNK	PF10_0327
PF3D7_1365700		SNARE associated Golgi protein, putative	No	0.468457	-0.558892	-0.090435	-0.567879	-0.549906	-0.0949993	-0.0858707	PF3D7_1365700	39	S	___1	ETELLNQHYNS(0.998)GINY(0.001)NYDTSVK	11	NPNEKETELLNQHYNSGINYNYDTSVKHGDN	MAL13P1.329
PF3D7_1473200		DnaJ protein, putative	No	0.468438	-1.26192	-0.793479	-1.34979	-1.17405	-1.02366	-0.563299	PF3D7_1473200	121	S	___1	AEQSENS(0.001)GKS(0.999)ENSGK	10	VEKVEKAEQSENSGKSENSGKSEISGKSEIS	PF14_0700
PF3D7_0422400	RPS19	40S ribosomal protein S19	No	0.467437	-1.37455	-0.90711	-1.34155	-1.40755	-1.08894	-0.725281	PF3D7_0422400	6	T	___1	AEQFT(1)EDIGVVNK	5	__________MAEQFTEDIGVVNKRLLEPVP	MAL4P1.206;PFD1055w
PF3D7_1209400	CIA1	cytosolic iron-sulfur protein assembly protein 1, putative	No	0.466937	2.64148	3.10842	2.77196	2.51101	3.04052	3.17632	PF3D7_1209400	237	S	___1	NGDS(1)VKNDDIYK	4	NGDSVKNGDSVKNGDSVKNDDIYKNDDRVKN	2277.t00095;MAL12P1.94;PFL0470w
PF3D7_1004400		RNA-binding protein, putative	No	0.466857	-4.43957	-3.97271	-4.48507	-4.39408	-4.15506	-3.79037	PF3D7_1004400	282	S	___1	HEGYLS(1)RDHAHK	6	HEGYRHEGYRHEGYLSRDHAHKEFHHNENPY	PF10_0047
PF3D7_0221200		Plasmodium exported protein (hyp15), unknown function	Yes	0.466847	-2.55093	-2.08408	-2.53763	-2.56423	-2.00457	-2.1636	PF3D7_0221200	65	S	___1	HTLT(0.004)NS(0.307)S(0.689)LR	7	EYGKEEFMKHTLTNSSLRNETILNDKLRKRN	PF02_0198;PFB0953w
PF3D7_1107300	PAIP1	polyadenylate-binding protein-interacting protein 1, putative	No	0.466778	3.47228	3.93906	3.59425	3.35031	3.90213	3.97598	PF3D7_1107300	2027	S	___1	KETDKADDIS(1)VCDTISVIEK	10	SVQNKKKETDKADDISVCDTISVIEKKEDFE	PF11_0086
PF3D7_0202000	KAHRP	erythrocyte membrane protein 1, PfEMP1	Yes	0.466753	0.106897	0.57365	0.03512	0.178675	0.66078	0.486521	PF3D7_0202000;PF3D7_1255200	549;1773	T	___2	GAT(1)KEAS(0.055)T(0.891)S(0.055)K	8	CAAEGATKGATKEASTSKEATKEASTSKEAT	PF02_0020;PFB0100c
PF3D7_1224300	PABP1	polyadenylate-binding protein, putative	No	0.466227	-1.18675	-0.72052	-1.08126	-1.29223	-0.653219	-0.787821	PF3D7_1224300	51	S	___1	VCRDS(0.999)VT(0.001)R	5	FNTVGHVSSIRVCRDSVTRKSLGYAYVNYHN	2277.t00234;MAL12P1.234;PFL1170w
PF3D7_1426000	RPL21	60S ribosomal protein L21	No	0.466223	-4.60398	-4.13775	-4.57888	-4.62908	-4.26778	-4.00773	PF3D7_1426000	161	Y	___1	IITIEPLPFY(0.001)EEY(0.999)	13	PSKIITIEPLPFYEEY_______________	PF14_0240
PF3D7_0704600	UT	E3 ubiquitin-protein ligase	No	0.466184	-0.627283	-0.161099	-0.67506	-0.579506	-0.0670795	-0.255119	PF3D7_0704600	3259	S	___1	LQTLDKES(1)DKAK	8	DENQEDIKLQTLDKESDKAKENLEEEQIQCE	MAL7P1.19
PF3D7_1149000	Pf332	antigen 332, DBL-like protein	Yes	0.466063	0.202753	0.668816	0.242561	0.162945	0.639421	0.69821	PF3D7_1149000	2337	T	___1	S(0.004)AT(0.996)EDLVEEEASVTEK	3	ERSVTEKPVEVERSATEDLVEEEASVTEKVS	PF11_0506;PF11_0507
PF3D7_1004300		E3 ubiquitin-protein ligase, putative	No	0.465722	-3.99907	-3.53335	-3.93171	-4.06643	-3.48156	-3.58514	PF3D7_1004300	981	S	___1	S(1)RDS(0.996)DNEKEGS(0.004)R	1	TTYSNASNSNNSTRRSRDSDNEKEGSRKKSK	PF10_0046
PF3D7_1436100		conserved Plasmodium membrane protein, unknown function	No	0.465592	-2.10633	-1.64074	-2.0892	-2.12346	-1.67147	-1.61001	PF3D7_1436100	373	S	___1	MIGS(1)FLHEK	4	SLMHYKKKDTKKMIGSFLHEKIYLDDENDLS	PF14_0342
PF3D7_0517300	SR1	serine/arginine-rich splicing factor 1	No	0.465448	0.493837	0.959286	0.51355	0.474125	0.998501	0.920071	PF3D7_0517300	265	S	___1	SLS(1)YQER	3	RRDTYDKKRSYSRSLSYQERRRNNRTISKSR	MAL5P1.173;PFE0865c
PF3D7_1445900	DDX5	ATP-dependent RNA helicase DDX5, putative	No	0.465137	-2.49601	-2.03088	-2.50765	-2.48438	-2.10561	-1.95614	PF3D7_1445900	456	S	___1	AGS(0.989)HGAS(0.01)FT(0.001)FLTADKYR	3	IEDYVHRIGRTGRAGSHGASFTFLTADKYRL	PF14_0436;PF14_0437
PF3D7_1207100		small subunit rRNA processing factor, putative	No	0.464997	0.779509	1.24451	0.814692	0.744326	1.16532	1.32369	PF3D7_1207100	488	S	___1	IIDDNCS(1)LDDYKIK	7	FCINYLDLRIIDDNCSLDDYKIKESCDHIPE	2277.t00072;MAL12P1.71;PFL0355c
PF3D7_1022400	SRSF4	serine/arginine-rich splicing factor 4	No	0.464678	-0.391877	0.0728006	-0.408039	-0.375715	0.0422611	0.10334	PF3D7_1022400	210	S	___2	RY(0.002)S(0.998)NES(1)GLS(1)DR	6	DYSPKYKKRRRYSNESGLSDRDRSRSRRYSK	PF10_0217
PF3D7_1478600	PTP3	EMP1-trafficking protein	Yes	0.464208	0.771908	1.23612	0.753981	0.789835	1.14619	1.32604	PF3D7_1478600	453	S	___1	KDNLQDS(1)NKGLNVTTNK	7	FIENDVSDKKDNLQDSNKGLNVTTNKTNDKT	PF14_0758
PF3D7_1307800		fork head domain protein, putative	No	0.464143	0.956478	1.42062	1.07648	0.836475	1.43183	1.40941	PF3D7_1307800	249	S	___2	SSEHT(0.006)RT(0.16)S(0.834)KDNSYYDSK	8	DKIYILKKSSEHTRTSKDNSYYDSKRKYRNI	PF13_0042
PF3D7_1307800		fork head domain protein, putative	No	0.464143	0.956478	1.42062	1.07648	0.836475	1.43183	1.40941	PF3D7_1307800	253	S	___2	T(0.447)S(0.553)KDNS(0.996)Y(0.003)YDSK	6	ILKKSSEHTRTSKDNSYYDSKRKYRNITSED	PF13_0042
PF3D7_0815800	VPS9	vacuolar protein sorting-associated protein 9, putative	No	0.464002	-1.20312	-0.73912	-1.14247	-1.26377	-0.62417	-0.854071	PF3D7_0815800	408	S	___1	NYS(0.42)DS(0.58)CNHMINHISSENIIK	5	NINNDMKETMKNYSDSCNHMINHISSENIIK	MAL8P1.82
PF3D7_1139300	ApiAP2	AP2 domain transcription factor, putative	No	0.463643	0.664158	1.1278	0.80455	0.523766	1.11983	1.13577	PF3D7_1139300	1794	S	___2	S(0.005)FDKCS(0.989)NENS(0.557)VCINKS(0.45)NEK	10	NSKILRSFDKCSNENSVCINKSNEKLENILD	PF11_0404
PF3D7_1359400	CELF1	CUGBP Elav-like family member 1	No	0.463587	-2.81257	-2.34898	-3.15224	-2.4729	-2.36796	-2.33001	PF3D7_1359400	137	S	___1	MAS(0.405)IS(0.595)EADNAIR	5	TNVHKSSAFVKMASISEADNAIRLLNNQKTL	PF13_0315
PF3D7_1138800		WD repeat-containing protein, putative	No	0.462973	-1.96506	-1.50209	-1.95956	-1.97057	-1.36914	-1.63504	PF3D7_1138800	1787	S	___1	ENMGININS(1)FDELK	9	FVEVEQKENMGININSFDELKYADNIRKSID	PF11_0399;PF11_0400;PF11_0401
PF3D7_0619400		cell division cycle protein 48 homologue, putative	No	0.462548	-1.9763	-1.51375	-1.89321	-2.05939	-1.42073	-1.60678	PF3D7_0619400	40	S	___1	LIVEEAT(0.016)NDDNS(0.984)VVALNTK	12	NLSRLIVEEATNDDNSVVALNTKRMEELNFF	2270.t00082;MAL6P1.232;PFF0940c
PF3D7_0501400	FIRA	interspersed repeat antigen	Yes	0.461828	0.834602	1.29643	0.88694	0.782265	1.22167	1.37119	PF3D7_0501400	677	S	___3	AS(1)EGDNISLSSLSEETQEK	2	QESIATQEHADEKKASEGDNISLSSLSEETQ	MAL5P1.15;PFE0070w
PF3D7_1311900	vapA	V-type proton ATPase catalytic subunit A	No	0.461627	-2.76265	-2.30102	-2.98265	-2.54264	-2.26472	-2.33732	PF3D7_1311900	283	S	___1	GNEMAEILS(0.993)DFPELT(0.003)T(0.004)K	9	YVGCGERGNEMAEILSDFPELTTKVDNEDVG	PF13_0065
PF3D7_1462400		conserved Plasmodium protein, unknown function	No	0.461603	-2.84539	-2.38379	-2.78564	-2.90514	-2.32907	-2.43851	PF3D7_1462400	852	S	___3	NDLY(1)EKQT(1)FS(1)IS(1)NINEK	10	LLNSKRNDLYEKQTFSISNINEKTKININKE	PF14_0594
PF3D7_1462400		conserved Plasmodium protein, unknown function	No	0.461603	-2.84539	-2.38379	-2.78564	-2.90514	-2.32907	-2.43851	PF3D7_1462400	854	S	___3	NDLY(1)EKQT(1)FS(1)IS(1)NINEK	12	NSKRNDLYEKQTFSISNINEKTKININKEKN	PF14_0594
PF3D7_1462400		conserved Plasmodium protein, unknown function	No	0.461603	-2.84539	-2.38379	-2.78564	-2.90514	-2.32907	-2.43851	PF3D7_1462400	850	T	___3	NDLY(1)EKQT(1)FS(1)IS(1)NINEK	8	DYLLNSKRNDLYEKQTFSISNINEKTKININ	PF14_0594
PF3D7_1462400		conserved Plasmodium protein, unknown function	No	0.461603	-2.84539	-2.38379	-2.78564	-2.90514	-2.32907	-2.43851	PF3D7_1462400	846	Y	___3	NDLY(1)EKQT(1)FS(1)IS(1)NINEK	4	QKKEDYLLNSKRNDLYEKQTFSISNINEKTK	PF14_0594
PF3D7_1326300		RNA-binding protein, putative	No	0.461298	-1.21226	-0.750964	-1.26222	-1.16231	-0.685379	-0.816549	PF3D7_1326300	171	S	___1	NLTS(0.011)S(0.989)HER	5	RKKRRHSNLNRNLTSSHERSRSRERRRRRIQ	PF13_0147
PF3D7_1459000	DBP5	ATP-dependent RNA helicase DBP5	No	0.461218	1.02781	1.48903	1.06516	0.990456	1.50158	1.47647	PF3D7_1459000	189	S	___1	EEKNEDNIS(0.871)T(0.114)S(0.015)DTQNVSNNIITK	9	PSELITKEEKNEDNISTSDTQNVSNNIITKS	PF14_0563
PF3D7_1401300	EH2	epoxide hydrolase 2	Yes	0.460968	1.86173	2.3227	1.82493	1.89853	2.32824	2.31715	PF3D7_1401300	111	T	___1	QRT(1)NNEQDNNYKDDER	3	DGIGANNLKKNIRQRTNNEQDNNYKDDERFI	PF14_0015
PF3D7_1111200		conserved Plasmodium protein, unknown function	No	0.459948	-0.132257	0.32769	-0.0801601	-0.184355	0.333561	0.321819	PF3D7_1111200	53	S	___1	QQS(0.987)DNS(0.013)KEHLDFNKYDNLSK	3	DQEGVDHNNLLCKQQSDNSKEHLDFNKYDNL	PF11_0118
PF3D7_0521000		conserved Plasmodium protein, unknown function	No	0.459322	-0.134871	0.32445	-0.101068	-0.168674	0.14328	0.505621	PF3D7_0521000	370	S	___1	HY(0.113)S(0.443)S(0.443)DVS(1)LNDEDLKYK	7	RKDTNYKRRHYSSDVSLNDEDLKYKDRKYHR	MAL5P1.211;PFE1055c
PF3D7_0922100		ubiquitin-like protein, putative	No	0.459222	-1.02873	-0.569505	-0.865389	-1.19206	-0.54796	-0.591049	PF3D7_0922100	931	S	___1	YPGS(1)INHEFLR	4	FYYQNFTNSYNRYPGSINHEFLRQIRNLYFS	PFI1085w
PF3D7_0730300	ApiAP2	AP2 domain transcription factor AP2-L, putative	No	0.459193	-2.15945	-1.70025	-2.06295	-2.25595	-1.79414	-1.60637	PF3D7_0730300	892	T	___2	CNQDS(0.06)Y(0.214)S(0.746)T(0.746)NEEPLS(0.222)NHS(0.013)INDPGK	8	NKNHIENRCNQDSYSTNEEPLSNHSINDPGK	PF07_0126
PF3D7_1004400		RNA-binding protein, putative	No	0.459191	1.52694	1.98613	1.84225	1.21164	2.25161	1.72066	PF3D7_1004400	7	S	___1	GKY(0.013)S(0.987)VS(0.999)R	6	_________MGKYSVSRKGEYSAERRYHYRD	PF10_0047
PF3D7_1036900		conserved Plasmodium protein, unknown function	No	0.458733	-1.18497	-0.726234	-1.12116	-1.24878	-0.692669	-0.7598	PF3D7_1036900	246	S	___1	HQGEHNVNDNVT(0.02)S(0.98)QK	13	VEKHQGEHNVNDNVTSQKSKKKKGTSTHNDI	PF10_0361
PF3D7_1429600	GEXP03	conserved Plasmodium protein, unknown function	Yes	0.458653	1.62919	2.08785	1.65926	1.59912	2.05634	2.11935	PF3D7_1429600	193	S	___1	S(1)AAS(1)EECVHFK	4	NDMSTNNDGTPRSAASEECVHFKEKSYLLDK	PF14_0275
PF3D7_1308200	cpsSII	carbamoyl phosphate synthetase	No	0.458462	-3.80778	-3.34932	-3.72333	-3.89223	-3.33266	-3.36598	PF3D7_1308200	1345	S	___2	VT(0.001)INNS(0.609)NNS(0.695)IS(0.695)NNENVETNLNCVSER	11	NKNIKVTINNSNNSISNNENVETNLNCVSER	PF13_0044
PF3D7_1447000		40S ribosomal protein S5	No	0.458288	-3.78776	-3.32947	-3.63247	-3.94306	-3.20658	-3.45237	PF3D7_1447000	147	S	___1	LS(1)LIPVR	2	EVATAIRGAIISAKLSLIPVRRGYWGNKIGD	PF14_0448
PF3D7_1002400.2-p1		RNA-binding protein, putative		0.457948	0.668403	1.12635	0.63006	0.706745	1.02882	1.22388	PF3D7_1002400.2-p1;PF3D7_1002400	224;226	S	___1	S(0.001)T(0.012)S(0.983)VS(0.004)NSER	3	DSKRKKRYDRVRKSTSVSNSERRRYRNSPDR
PF3D7_1343700	Kelch13	kelch protein K13	No	0.457852	-1.54628	-1.08842	-1.58781	-1.50475	-1.19293	-0.983919	PF3D7_1343700	66	S	___1	T(0.001)ENNS(0.377)FLLNNS(0.526)S(0.089)Y(0.008)GNVK	11	DKNEKTENNSFLLNNSSYGNVKDSLLESIDM	PF13_0238
PF3D7_0530900	FRM1	formin 1	No	0.457813	-2.90874	-2.45092	-2.85558	-2.96189	-2.45994	-2.44191	PF3D7_0530900	1604	S	___3	NNS(1)NNIY(1)S(1)IKALNK	3	ELDSNLLNNKYKKNNSNNIYSIKALNKKTDH	MAL5P1.306;PFE1545c
PF3D7_0530900	FRM1	formin 1	No	0.457813	-2.90874	-2.45092	-2.85558	-2.96189	-2.45994	-2.44191	PF3D7_0530900	1609	S	___3	NNS(1)NNIY(1)S(1)IKALNK	8	LLNNKYKKNNSNNIYSIKALNKKTDHQSNIE	MAL5P1.306;PFE1545c
PF3D7_0530900	FRM1	formin 1	No	0.457813	-2.90874	-2.45092	-2.85558	-2.96189	-2.45994	-2.44191	PF3D7_0530900	1608	Y	___3	NNS(1)NNIY(1)S(1)IKALNK	7	NLLNNKYKKNNSNNIYSIKALNKKTDHQSNI	MAL5P1.306;PFE1545c
PF3D7_1013900		translation initiation factor eIF-2B subunit delta, putative	No	0.457672	-0.356452	0.10122	-0.476189	-0.236715	0.216511	-0.0140705	PF3D7_1013900	177	S	___2	TLNSCLLNECPHFS(1)DS(0.528)S(0.471)NLEYRDEER	14	AKTLNSCLLNECPHFSDSSNLEYRDEERKKN	PF10_0136
PF3D7_0704600	UT	E3 ubiquitin-protein ligase	No	0.457603	-0.565698	-0.108094	-0.55274	-0.578655	-0.164919	-0.0512695	PF3D7_0704600	3241	S	___1	INNKEDDEKS(1)ALDENQEDIK	10	KKGSLKINNKEDDEKSALDENQEDIKLQTLD	MAL7P1.19
PF3D7_1231600	PRP2	pre-mRNA-splicing factor ATP-dependent RNA helicase PRP2, putative	No	0.456948	1.54149	1.99844	1.67021	1.41278	2.01504	1.98184	PF3D7_1231600	11	S	___1	S(1)IEFTDNDESKK	1	_____MNEKSDLHKRSIEFTDNDESKKKIKT	2277.t00305;MAL12P1.305;PFL1525c
PF3D7_0112200	MRP1	multidrug resistance-associated protein 1	No	0.456593	1.91805	2.37464	1.94454	1.89156	2.49279	2.25649	PF3D7_0112200	1523	S	___2	NVS(0.994)LS(0.018)S(0.988)IINSSQDDESKK	3	NISDKISAIVEYKNVSLSSIINSSQDDESKK	MAL1P3.03;PFA0590w
PF3D7_0731300	PfG174	Plasmodium exported protein (PHISTb), unknown function	Yes	0.456193	3.16017	3.61637	3.23039	3.08995	3.58109	3.65164	PF3D7_0731300	78	S	___1	NVKDGNDS(0.995)S(0.868)S(0.136)EELDNTNVPTSKPK	8	SNYSEVMKNVKDGNDSSSEELDNTNVPTSKP	MAL7P1.174
PF3D7_0801800		mannose-6-phosphate isomerase, putative	No	0.455937	-1.69135	-1.23541	-1.59385	-1.78885	-1.19312	-1.27771	PF3D7_0801800	716	T	___1	ECATGCS(0.074)NEY(0.391)T(0.527)NVY(0.008)DNLNK	11	KVCEKECATGCSNEYTNVYDNLNKQNDPYFI	MAL8P1.156
PF3D7_0309500	AS	asparagine synthetase [glutamine-hydrolyzing], putative	No	0.455487	-0.535412	-0.0799246	-0.871519	-0.199305	0.376041	-0.535891	PF3D7_0309500	607	S	___1	CIPLQNQES(1)INY	9	KQFDDVKCIPLQNQESINY____________	MAL3P3.14;PFC0395w
PF3D7_1107800	ApiAP2	AP2 domain transcription factor, putative	No	0.455438	1.32133	1.77677	1.4198	1.22286	1.71603	1.83751	PF3D7_1107800	268	S	___1	LNENNNLYLNCLS(0.987)DS(0.013)YDENNVIKK	13	NEKLNENNNLYLNCLSDSYDENNVIKKKDAT	PF11_0091
PF3D7_1467900		rab GTPase activator, putative	No	0.455367	3.38702	3.84239	3.44383	3.33022	3.83604	3.84874	PF3D7_1467900	1058	S	___1	NQMKNEES(1)DNEQKEK	8	ENNNDDYRNQMKNEESDNEQKEKNMDNENND	PF14_0647
PF3D7_1212700	EIF3A	eukaryotic translation initiation factor 3 subunit A, putative	No	0.455217	1.17551	1.63073	1.0815	1.26953	1.64573	1.61573	PF3D7_1212700	1285	S	___1	HET(0.018)S(0.982)EENTK	4	WNLKEDDDSKAKHETSEENTKSWRNNNKVID	2277.t00126;MAL12P1.125;PFL0625c
PF3D7_0415300	CRK3	cdc2-related protein kinase 3	No	0.454933	-2.73163	-2.2767	-2.70502	-2.75825	-2.27185	-2.28155	PF3D7_0415300	1089	S	___1	S(0.998)AT(0.002)ISR	1	HKLNSNKSDIDKTRKSATISRDGSLRRNERK	MAL4P1.143;PFD0740w
PF3D7_0501400	FIRA	interspersed repeat antigen	Yes	0.454358	0.891447	1.34581	0.95504	0.827854	1.22447	1.46714	PF3D7_0501400	683	S	___3	ASEGDNIS(1)LS(0.629)S(0.365)LS(0.006)EETQEK	8	QEHADEKKASEGDNISLSSLSEETQEKSHTK	MAL5P1.15;PFE0070w
PF3D7_0818900	HSP70	heat shock protein 70	No	0.453837	-0.663392	-0.209555	-0.679449	-0.647335	-0.201149	-0.21796	PF3D7_0818900	92	S	___1	KFT(0.09)ES(0.821)S(0.09)VQSDMK	5	TVFDAKRLIGRKFTESSVQSDMKHWPFTVKS	PF08_0054
PF3D7_0918900	gammaGCS	gamma-glutamylcysteine synthetase	No	0.453743	-1.64917	-1.19542	-1.57441	-1.72392	-1.3905	-1.00035	PF3D7_0918900	1037	T	___1	YISGEDYTQYLLLNEVLKDDQDYCT(0.5)CT(0.5)RR	25	YLLLNEVLKDDQDYCTCTRRTIYEESMDNTV	PFI0925w
PF3D7_0918900	gammaGCS	gamma-glutamylcysteine synthetase	No	0.453743	-1.64917	-1.19542	-1.57441	-1.72392	-1.3905	-1.00035	PF3D7_0918900	1039	T	___1	YISGEDYTQYLLLNEVLKDDQDYCT(0.5)CT(0.5)RR	27	LLNEVLKDDQDYCTCTRRTIYEESMDNTVEF	PFI0925w
PF3D7_1438400	MCA2	metacaspase-like protein	No	0.453341	2.42722	2.88056	2.54806	2.30639	2.88719	2.87394	PF3D7_1438400	559	S	___1	S(0.004)FS(0.975)S(0.021)FDVK	3	TNYMNKDSTKNVRSFSSFDVKERISPRVIRN	PF14_0362;PF14_0363
PF3D7_1438400	MCA2	metacaspase-like protein	No	0.452996	0.203758	0.656754	0.210871	0.196646	0.64304	0.670469	PF3D7_1438400	58	S	___1	ILVKES(1)ENDRNES(1)IQK	13	KGRILVKESENDRNESIQKKQMLSSMDNRKT	PF14_0362;PF14_0363
PF3D7_1473700	NUP116	nucleoporin NUP116/NSP116, putative	No	0.452918	-1.80397	-1.35105	-1.6203	-1.98763	-1.42471	-1.27739	PF3D7_1473700	741	T	___1	IIHT(0.576)S(0.424)DAIKEIVQPHQR	4	NQIQKLPFKRSRIIHTSDAIKEIVQPHQRKK	PF14_0706
PF3D7_1001500	ETRAMP10	early transcribed membrane protein 10.1	Yes	0.452887	0.626389	1.07928	0.643951	0.608826	1.09905	1.0595	PF3D7_1001500	100	T	___1	NKS(0.948)QEGS(0.185)T(0.84)PLLT(0.027)AKA	8	KKGSNDSKNKSQEGSTPLLTAKA________	PF10_0019
PF3D7_1136600		conserved Plasmodium protein, unknown function	No	0.452682	-2.82513	-2.37245	-2.6989	-2.95135	-2.32345	-2.42144	PF3D7_1136600	1109	S	___2	ENIDENIT(0.489)T(0.537)DY(0.018)ES(0.809)S(0.147)KNIR	13	KEKENIDENITTDYESSKNIREGKKIKINEI	PF11_0378
PF3D7_1413000		conserved Plasmodium protein, unknown function	No	0.452637	-1.6338	-1.18116	-2.23899	-1.0286	-0.969259	-1.39306	PF3D7_1413000	125	S	___3	S(0.846)T(0.852)NY(0.234)NKFNS(0.079)LVVS(0.392)KS(0.315)FS(0.283)MK	1	TQRSNISLNRITKCKSTNYNKFNSLVVSKSF	PF14_0129
PF3D7_1138500	PPM2	protein phosphatase PPM2	No	0.452302	-2.6381	-2.1858	-2.61513	-2.66107	-2.01105	-2.36055	PF3D7_1138500	257	S	___1	SDENYDS(0.983)S(0.017)NLNLGDNQDRK	7	GTNGENILRSDENYDSSNLNLGDNQDRKNYD	PF11_0396
PF3D7_0506800	TCF25	transcription factor 25, putative	No	0.452072	2.03763	2.48971	2.10894	1.96633	2.48701	2.4924	PF3D7_0506800	133	S	___1	NVDDEIS(1)DILNEINKEEKK	7	KKKKKKKKKNVDDEISDILNEINKEEKKNNK	MAL5P1.69;PFE0335w
PF3D7_1212900	BDP2	bromodomain protein 2, putative	No	0.451718	-1.45678	-1.00506	-1.49831	-1.41525	-1.03379	-0.976339	PF3D7_1212900	435	S	___1	NVHGGSTNLGTNNS(0.993)T(0.977)PT(0.028)HNNS(0.001)NTGK	14	NKNVHGGSTNLGTNNSTPTHNNSNTGKGKGS	2277.t00128;MAL12P1.127;PFL0635c
PF3D7_0501400	FIRA	interspersed repeat antigen	Yes	0.451492	1.16128	1.61277	1.22585	1.09671	1.53236	1.69319	PF3D7_0501400	686	S	___3	KAS(0.014)EGDNIS(0.983)LS(0.947)S(0.949)LS(0.106)EET(0.001)QEK	12	ADEKKASEGDNISLSSLSEETQEKSHTKKKK	MAL5P1.15;PFE0070w
PF3D7_0804300		zinc finger protein, putative	No	0.451422	1.88811	2.33953	2.04445	1.73177	2.14076	2.5383	PF3D7_0804300	411	S	___1	NIDNVNYDS(0.977)S(0.023)YEEDMKIK	9	FKKCSSRNIDNVNYDSSYEEDMKIKNLHHKE	MAL8P1.141
PF3D7_1417200		NOT family protein, putative	No	0.451273	-2.67688	-2.22561	-2.65631	-2.69746	-2.21071	-2.24051	PF3D7_1417200	2936	S	___1	INT(0.045)PNS(0.955)IHGNNIECNENNNMYLK	6	NQKFIHKDSKINTPNSIHGNNIECNENNNMY	PF14_0170
PF3D7_0817300		conserved Plasmodium protein, unknown function	No	0.451167	-3.2773	-2.82613	-3.25854	-3.29605	-2.8747	-2.77756	PF3D7_0817300	29	S	___2	NNSSNSSNENNNNDENVS(1)LHAER	18	SSNSSNENNNNDENVSLHAERNNETNCTKGN	PF08_0060
PF3D7_1339300		conserved Plasmodium protein, unknown function	No	0.450942	-0.262992	0.18795	-0.25042	-0.275564	0.253561	0.122339	PF3D7_1339300	120	T	___1	T(0.421)CS(0.583)DNT(0.994)HNEDGS(0.003)K	6	KSFSYSEESKTCSDNTHNEDGSKKQNFSRTL	PF13_0215
PF3D7_1362700		conserved Plasmodium protein, unknown function	No	0.450653	0.398723	0.849376	0.42894	0.368505	0.66785	1.0309	PF3D7_1362700	913	S	___2	EGS(1)NVNS(0.901)CT(0.099)EENTGANNKEK	3	NDNSMNSSNNHFREGSNVNSCTEENTGANNK	MAL13P1.313;PF13_0332
PF3D7_1362700		conserved Plasmodium protein, unknown function	No	0.450653	0.398723	0.849376	0.42894	0.368505	0.66785	1.0309	PF3D7_1362700	917	S	___2	EGSNVNS(0.996)CT(0.004)EENTGANNK	7	MNSSNNHFREGSNVNSCTEENTGANNKEKIF	MAL13P1.313;PF13_0332
PF3D7_1453900		conserved Plasmodium protein, unknown function	No	0.450647	1.42997	1.88062	1.39663	1.4633	1.85965	1.90158	PF3D7_1453900	136	S	___1	CYDVCTMSLDES(1)EHEIVMDNDNER	12	ENKKCYDVCTMSLDESEHEIVMDNDNERKGV	PF14_0512
PF3D7_0322400		regulator of initiation factor 2 (eIF2)	No	0.450017	-2.51113	-2.06111	-2.53969	-2.48256	-2.08119	-2.04103	PF3D7_0322400	445	T	___1	INNQCEDNS(0.5)EGDT(0.5)HMEGK	13	TNRINNQCEDNSEGDTHMEGKKIKNKNNNNN	MAL3P7.30;PFC1000w
PF3D7_0703200		conserved Plasmodium protein, unknown function	No	0.449943	-3.81227	-3.36232	-3.6246	-3.99994	-3.1466	-3.57805	PF3D7_0703200	1456	S	___1	QNFLT(0.049)Y(0.45)QS(0.501)DDDDKCS(0.001)KPK	8	NLSYDLTKQNFLTYQSDDDDKCSKPKYVKDR	PF07_0012
PF3D7_0801000		Plasmodium exported protein (PHISTc), unknown function	Yes	0.449562	0.332483	0.782045	0.355631	0.309336	0.757221	0.80687	PF3D7_0801000	307	S	___1	DNYAS(1)EQEYFDRGEQLNDVSADNNTSNK	5	PTQHDVPVQLRDNYASEQEYFDRGEQLNDVS	PF08_0137
PF3D7_1410300		WD repeat-containing protein, putative	No	0.449537	0.0295782	0.479115	-0.0313091	0.0904655	0.407721	0.55051	PF3D7_1410300	2482	S	___1	KKNEES(1)EQNIEEYFCSK	6	NKEDDIRDDKKKNEESEQNIEEYFCSKNNES	PF14_0101
PF3D7_0601900		conserved Plasmodium protein, unknown function	Yes	0.449512	-2.19274	-1.74323	-2.26005	-2.12543	-1.8081	-1.67836	PF3D7_0601900	123	S	___2	SHSSSSSVY(0.014)AS(0.986)ANAEN	11	RQAARSHSSSSSVYASANAEN__________	2270.t00296;MAL6P1.22;PFF0090w
PF3D7_0511000	TCTP	translationally-controlled tumor protein homolog	No	0.448982	-0.521817	-0.072835	-0.76342	-0.280214	-0.192699	0.0470295	PF3D7_0511000	15	S	___1	VFKDVFT(0.001)NDEVCS(0.997)DS(0.003)YVQQDPFEVPEFR	13	_MKVFKDVFTNDEVCSDSYVQQDPFEVPEFR	MAL5P1.110;PFE0545c
PF3D7_0301700		Plasmodium exported protein, unknown function	Yes	0.448452	1.36043	1.80888	1.36946	1.3514	1.77607	1.8417	PF3D7_0301700	149	T	___2	VTVLEPQT(1)ENS(1)EDEENYEK	8	EYYNSTPRVTVLEPQTENSEDEENYEKTIVD	MAL3P8.15;PFC0085c
PF3D7_1433900		protein kinase, putative	No	0.448388	-0.714272	-0.265884	-0.54085	-0.887695	-0.21707	-0.314699	PF3D7_1433900	777	S	___3	NIIY(0.975)PT(0.971)LFS(0.997)T(0.996)KMVVDY(0.061)LNK	9	CIFSFKRNIIYPTLFSTKMVVDYLNKNVKEK	PF14_0320
PF3D7_1433900		protein kinase, putative	No	0.448388	-0.714272	-0.265884	-0.54085	-0.887695	-0.21707	-0.314699	PF3D7_1433900	774	T	___3	NIIY(0.975)PT(0.971)LFS(0.997)T(0.996)KMVVDY(0.061)LNK	6	CTHCIFSFKRNIIYPTLFSTKMVVDYLNKNV	PF14_0320
PF3D7_1433900		protein kinase, putative	No	0.448388	-0.714272	-0.265884	-0.54085	-0.887695	-0.21707	-0.314699	PF3D7_1433900	778	T	___3	NIIY(0.975)PT(0.971)LFS(0.997)T(0.996)KMVVDY(0.061)LNK	10	IFSFKRNIIYPTLFSTKMVVDYLNKNVKEKN	PF14_0320
PF3D7_1433900		protein kinase, putative	No	0.448388	-0.714272	-0.265884	-0.54085	-0.887695	-0.21707	-0.314699	PF3D7_1433900	772	Y	___3	NIIY(0.975)PT(0.971)LFS(0.997)T(0.996)KMVVDY(0.061)LNK	4	FKCTHCIFSFKRNIIYPTLFSTKMVVDYLNK	PF14_0320
PF3D7_0503300	SRSF12	serine/arginine-rich splicing factor 12	No	0.448148	-0.669997	-0.221849	-0.570629	-0.769365	-0.125639	-0.31806	PF3D7_0503300	76	S	___1	EMNGS(1)EIDGSR	5	YDAKDAEQALKEMNGSEIDGSRIEVFVAQKG	MAL5P1.33;PFE0160c
PF3D7_0801800		mannose-6-phosphate isomerase, putative	No	0.447942	-0.884402	-0.43646	-0.81686	-0.951944	-0.39134	-0.481581	PF3D7_0801800	225	S	___2	RYS(1)DIEFASLNNDSTK	3	TKGSTLGGENDLKRYSDIEFASLNNDSTKEK	MAL8P1.156
PF3D7_0801800		mannose-6-phosphate isomerase, putative	No	0.447942	-0.884402	-0.43646	-0.81686	-0.951944	-0.39134	-0.481581	PF3D7_0801800	231	S	___2	RY(0.016)S(0.984)DIEFAS(0.999)LNNDS(0.001)T(0.001)KEK	9	GGENDLKRYSDIEFASLNNDSTKEKEDMNEQ	MAL8P1.156
PF3D7_1142100		conserved Plasmodium protein, unknown function	No	0.447658	-0.970278	-0.52262	-0.81958	-1.12098	-0.43799	-0.60725	PF3D7_1142100	2170	S	___1	FIPS(0.087)DS(0.913)QTK	6	DYTNDNINNRFIPSDSQTKEDYNYDKYRKNE	PF11_0433
PF3D7_1459000	DBP5	ATP-dependent RNA helicase DBP5	No	0.447423	0.635283	1.08271	0.776411	0.494154	1.11926	1.04615	PF3D7_1459000	190	T	___1	EEKNEDNIS(0.075)T(0.819)S(0.106)DTQNVSNNIITK	10	SELITKEEKNEDNISTSDTQNVSNNIITKSE	PF14_0563
PF3D7_1362700		conserved Plasmodium protein, unknown function	No	0.447383	2.27701	2.7244	2.21189	2.34213	2.62757	2.82122	PF3D7_1362700	798	S	___1	NEKDT(0.001)HS(0.999)DNNMK	7	SNHINDTTKNEKDTHSDNNMKSVPNNKNKNK	MAL13P1.313;PF13_0332
PF3D7_0821100	PK1	protein kinase 1	No	0.447268	-0.825858	-0.37859	-0.73122	-0.920496	-0.425508	-0.331671	PF3D7_0821100	712	Y	___1	YFSY(1)VCSR	4	FNTSIKLKENYKYFSYVCSRYYRAPELLFGS	PF08_0044
PF3D7_0824400	NT2	nucleoside transporter 2	No	0.447237	3.9479	4.39513	3.99158	3.90421	4.38966	4.40061	PF3D7_0824400	27	S	___1	IINEDDES(1)LLNMKK	8	MDGITENKIINEDDESLLNMKKEEIILNGKF	MAL8P1.32
PF3D7_1004400		RNA-binding protein, putative	No	0.446637	1.24239	1.68903	1.27423	1.21055	1.69405	1.68401	PF3D7_1004400	650	S	___2	S(0.403)S(0.596)EEVGEHT(0.001)NS(1)IINEDINKDQTDIIDEK	2	EEKMINGNKKRILKSSEEVGEHTNSIINEDI	PF10_0047
PF3D7_0501400	FIRA	interspersed repeat antigen	Yes	0.446259	-0.115088	0.331171	0.0181503	-0.248325	0.292791	0.369551	PF3D7_0501400	1231	S	___1	NEKKPS(1)LEGVK	6	RGDKNDKKSKNEKKPSLEGVKQNAEEQKEQP	MAL5P1.15;PFE0070w
PF3D7_0730900	PTP4	EMP1-trafficking protein	Yes	0.446129	0.848447	1.29458	0.84952	0.847374	1.2258	1.36335	PF3D7_0730900	1486	S	___1	S(0.002)FS(0.143)S(0.855)QGIREDFPYK	4	MKGQKYGSKNVRSFSSQGIREDFPYKNENNH	MAL7P1.171
PF3D7_1305000		conserved Plasmodium protein, unknown function	No	0.445652	1.25611	1.70176	1.34262	1.1696	1.70121	1.70231	PF3D7_1305000	564	S	___1	IFSDDDES(1)EESFLSSYK	8	NVKRRKKKIFSDDDESEESFLSSYKNVEKDI	PF13_0024
PF3D7_1227700	KIC2	conserved Plasmodium protein, unknown function	No	0.445437	-0.0275469	0.417891	0.00921059	-0.0643044	0.393711	0.44207	PF3D7_1227700	685	T	___2	NIT(0.013)IGS(0.987)LADT(1)EKR	10	KKSYDKNITIGSLADTEKRSIKIKNIIPHSH	2277.t00268;MAL12P1.268;PFL1340c
PF3D7_0812700	SNRPC	U1 small nuclear ribonucleoprotein C, putative	No	0.444742	0.682293	1.12704	0.74155	0.623035	1.11557	1.1385	PF3D7_0812700	235	S	___1	EHIESDIS(1)	8	FLNPENSKEHIESDIS_______________	PF08_0084
PF3D7_1328500		alpha/beta-hydrolase, putative	No	0.444504	1.70043	2.14493	1.69664	1.70421	2.11418	2.17568	PF3D7_1328500	259	S	___1	YT(0.002)S(0.045)T(0.284)S(0.836)S(0.833)LNKVNGNNNIECENLR	5	IEVKSEVNIPKYTSTSSLNKVNGNNNIECEN	PF13_0153
PF3D7_1234800	SF3B3	splicing factor 3B subunit 3, putative	No	0.443222	-0.175158	0.268064	0.0294609	-0.379776	0.33717	0.198959	PF3D7_1234800	210	S	___1	QINEELENENDDEDKS(1)DEER	16	QINEELENENDDEDKSDEERKDNNDIINDKN	2277.t00336;MAL12P1.335;PFL1680w
PF3D7_0301600	GEXP21	Plasmodium exported protein (hyp1), unknown function	Yes	0.442623	-3.23496	-2.79233	-3.28147	-3.18845	-2.84301	-2.74166	PF3D7_0301600	599	T	___1	IS(0.3)T(0.687)S(0.013)SHSTR	3	PSEYKNSPFKESKISTSSHSTRSYENEFNLS	MAL3P8.14;PFC0080c
PF3D7_0815800	VPS9	vacuolar protein sorting-associated protein 9, putative	No	0.442493	2.71589	3.15839	2.75514	2.67665	3.15696	3.15981	PF3D7_0815800	258	S	___1	S(1)Y(1)HAGS(1)PINK	6	NNNINTHVDKSYHAGSPINKKKIPPMQNINN	MAL8P1.82
PF3D7_0731300	PfG174	Plasmodium exported protein (PHISTb), unknown function	Yes	0.442263	1.80912	2.25138	1.86266	1.75558	2.20678	2.29598	PF3D7_0731300	80	S	___2	NVKDGNDS(0.014)S(0.11)S(0.876)EELDNTNVPTSKPK	10	YSEVMKNVKDGNDSSSEELDNTNVPTSKPKK	MAL7P1.174
PF3D7_1004400		RNA-binding protein, putative	No	0.442258	1.13356	1.57582	1.16318	1.10394	1.58949	1.56215	PF3D7_1004400	659	S	___2	S(0.452)S(0.548)EEVGEHTNS(1)IINEDINKDQTDIIDEK	11	KRILKSSEEVGEHTNSIINEDINKDQTDIID	PF10_0047
PF3D7_0112200	MRP1	multidrug resistance-associated protein 1	No	0.441917	2.12161	2.56353	2.15982	2.0834	2.66921	2.45784	PF3D7_0112200	1526	S	___2	NVS(0.994)LS(0.018)S(0.988)IINSSQDDESKK	6	DKISAIVEYKNVSLSSIINSSQDDESKKKYG	MAL1P3.03;PFA0590w
PF3D7_1466400	ApiAP2	AP2 domain transcription factor AP2-SP	No	0.441837	1.12805	1.56989	1.16608	1.09002	1.58976	1.55002	PF3D7_1466400	553	T	___1	T(0.943)T(0.057)SNINNR	1	DHSLKGQMELSKRKKTTSNINNRKNDLLEDS	PF14_0633
PF3D7_1438400	MCA2	metacaspase-like protein	No	0.441832	-1.05414	-0.61231	-1.11095	-0.997335	-0.59321	-0.631411	PF3D7_1438400	76	S	___1	T(0.046)NKS(0.954)EKHNISSYYK	4	KKQMLSSMDNRKTNKSEKHNISSYYKMRKKA	PF14_0362;PF14_0363
PF3D7_1351000		phosphatidylinositol transfer protein, putative	No	0.441653	-2.14939	-1.70774	-2.06052	-2.23827	-1.66931	-1.74617	PF3D7_1351000	913	S	___1	FVES(0.632)AVNNY(0.368)WDNK	4	GLKMKTQDDKNKFVESAVNNYWDNKMDKNFN	MAL13P1.256
PF3D7_0614300	MFR1	major facilitator superfamily-related transporter, putative	No	0.441322	1.11994	1.56126	1.18606	1.05383	1.81835	1.30418	PF3D7_0614300	558	S	___1	S(0.587)YS(0.413)KDKR	1	KAYGNDELYLNPAQRSYSKDKRDKFLEIEIE	2270.t00033;MAL6P1.283;PFF0690c
PF3D7_0206000	RAD2	DNA repair protein RAD2, putative	No	0.440207	-0.373267	0.0669403	-0.302	-0.444534	0.00599098	0.12789	PF3D7_0206000	1057	S	___1	DYIS(1)DVDKNHVNNIYNIER	4	DNDDELEKNLSKDYISDVDKNHVNNIYNIER	PF02_0056;PFB0265c
PF3D7_1358800	RPS15	40S ribosomal protein S15	No	0.440022	-0.699437	-0.259415	-0.619349	-0.779526	-0.0669193	-0.45191	PF3D7_1358800	24	S	___1	KQPS(1)WLK	4	KGISSSTLPYKRKQPSWLKQKPSEIEDAIIK	PF13_0316
PF3D7_1442700		conserved Plasmodium protein, unknown function	No	0.439898	-1.10791	-0.668015	-1.05032	-1.1655	-0.607969	-0.72806	PF3D7_1442700	1449	S	___1	S(1)LDIKDDIK	1	PLRKNKLNHSYNSIKSLDIKDDIKLEENNKE	PF14_0405
PF3D7_0202000	KAHRP	knob-associated histidine-rich protein	Yes	0.439673	2.79284	3.23252	2.84923	2.73645	3.17121	3.29382	PF3D7_0202000	554	T	___2	EAT(1)KEAS(0.322)T(0.356)S(0.322)K	3	ATKGATKEASTSKEATKEASTSKEATKEAST	PF02_0020;PFB0100c
PF3D7_0729100		conserved Plasmodium protein, unknown function	No	0.439402	-1.87838	-1.43898	-1.72483	-2.03193	-1.51532	-1.36263	PF3D7_0729100	1129	S	___2	PVFNDRES(0.999)EIS(0.952)VNKHILGNS(0.049)NK	8	SSPLILAKPVFNDRESEISVNKHILGNSNKN	PF07_0120
PF3D7_0729100		conserved Plasmodium protein, unknown function	No	0.439402	-1.87838	-1.43898	-1.72483	-2.03193	-1.51532	-1.36263	PF3D7_0729100	1132	S	___2	ES(0.041)EIS(0.959)VNKHILGNSNK	5	LILAKPVFNDRESEISVNKHILGNSNKNLFR	PF07_0120
PF3D7_1013500	PI-PLC	phosphoinositide-specific phospholipase C	No	0.439252	-1.26395	-0.8247	-1.31558	-1.21233	-0.83642	-0.812981	PF3D7_1013500	921	S	___1	NDNNMDNDS(1)S(1)DNNNNNNVK	9	ILNIIKKNDNNMDNDSSDNNNNNNVKIPKNS	PF10_0132
PF3D7_0708400	HSP90	heat shock protein 90	No	0.439223	0.500293	0.939516	0.471731	0.528854	0.787271	1.09176	PF3D7_0708400	49	S	___1	YES(0.998)IT(0.002)DTQK	3	LISNASDALDKIRYESITDTQKLSAEPEFFI	PF07_0029
PF3D7_1138700	KIC5	conserved Plasmodium protein, unknown function	No	0.438993	-1.06268	-0.623685	-0.94569	-1.17966	-0.7157	-0.53167	PF3D7_1138700	227	S	___1	DFDNNIQDT(0.002)NLFS(0.168)S(0.83)EFDEELNEYRHEK	14	NKDFDNNIQDTNLFSSEFDEELNEYRHEKFN	PF11_0398
PF3D7_1134600		zinc finger protein, putative	No	0.438828	-2.03198	-1.59315	-1.96638	-2.09757	-1.78708	-1.39922	PF3D7_1134600	4	S	___1	S(0.143)QS(0.857)KPNQEISSR	3	____________MSQSKPNQEISSRNLHEKH	PF11_0357
PF3D7_1329500		conserved Plasmodium protein, unknown function	No	0.438732	-0.597367	-0.158635	-0.540009	-0.654726	-0.19738	-0.11989	PF3D7_1329500	1715	S	___1	NS(0.999)Y(0.001)NNMDK	2	LANFAKMEDDFMPRNSYNNMDKKSKNNGMPP	PF13_0162
PF3D7_1009400	ZNF2	zinc finger protein, putative	No	0.438627	-2.19229	-1.75366	-2.09844	-2.28613	-1.86347	-1.64385	PF3D7_1009400	313	S	___1	WDVPEPS(0.994)EGDPS(0.006)ILK	7	IQQKRPSTKWDVPEPSEGDPSILKHNKEDST	PF10_0091
PF3D7_1426100	BTF3	basic transcription factor 3b, putative	No	0.438553	-1.73599	-1.29744	-1.70583	-1.76616	-1.32273	-1.27215	PF3D7_1426100	43	S	___1	VHKNS(0.978)IS(0.022)NEK	5	GKGSARRKIKKVHKNSISNEKKINIILKKIG	PF14_0241
PF3D7_0827300		conserved Plasmodium protein, unknown function	No	0.438387	-0.276147	0.16224	-0.162498	-0.389795	0.1399	0.18458	PF3D7_0827300	456	S	___2	INQEDKS(1)DISLSTCCMQSEK	7	NSAEMETGRINQEDKSDISLSTCCMQSEKNK	PF08_0016
PF3D7_0827300		conserved Plasmodium protein, unknown function	No	0.438387	-0.276147	0.16224	-0.162498	-0.389795	0.1399	0.18458	PF3D7_0827300	461	S	___2	INQEDKS(0.986)DIS(0.022)LS(0.704)T(0.288)CCMQSEK	12	ETGRINQEDKSDISLSTCCMQSEKNKENEKY	PF08_0016
PF3D7_1453900		conserved Plasmodium protein, unknown function	No	0.438048	3.67091	4.10896	3.72098	3.62085	4.04777	4.17015	PF3D7_1453900	352	S	___1	S(1)HNDVEEGK	1	NKDNANLNDAYEDRRSHNDVEEGKISELLID	PF14_0512
PF3D7_0812500		RNA-binding protein, putative	No	0.437283	0.150973	0.588256	0.316351	-0.0144043	0.571981	0.60453	PF3D7_0812500	20	S	___2	LEEERS(1)NT(1)CEETEQVEETSNNK	6	FSRKKKSEERLEEERSNTCEETEQVEETSNN	PF08_0086
PF3D7_0818900	HSP70	heat shock protein 70	No	0.437222	-2.31945	-1.88223	-2.40654	-2.23236	-1.9324	-1.83206	PF3D7_0818900	442	T	___1	KS(0.358)QIFT(0.513)T(0.129)YADNQPGVLIQVYEGER	6	IERNTTIPAKKSQIFTTYADNQPGVLIQVYE	PF08_0054
PF3D7_1223400		phospholipid-transporting ATPase, putative	No	0.436748	2.42895	2.86569	2.37245	2.48545	2.89135	2.84004	PF3D7_1223400	412	S	___1	TTENNNHSLNDNQLLNYS(1)FDMAKEDEGR	18	ENNNHSLNDNQLLNYSFDMAKEDEGRVQDDE	2277.t00225;MAL12P1.225;PFL1125w
PF3D7_0617200		conserved Plasmodium protein, unknown function	No	0.436522	0.0195179	0.45604	0.0562515	-0.0172157	0.32057	0.591511	PF3D7_0617200	25	S	___1	LGS(0.361)IS(0.634)QS(0.004)IDEIKK	5	EKPDFDAYNEKLGSISQSIDEIKKKIDNLQK	2270.t00061;MAL6P1.254;PFF0835w
PF3D7_1302100	G27/25	gamete antigen 27/25	No	0.435962	-1.27599	-0.840025	-1.20692	-1.34505	-0.751249	-0.928801	PF3D7_1302100	208	T	___1	PIPALPVT(1)PDEPHHNNI	8	VVDSYIIKPIPALPVTPDEPHHNNI______	PF13_0011
PF3D7_0202000	KAHRP	knob-associated histidine-rich protein	Yes	0.435808	4.65097	5.08678	4.61948	4.68246	4.99265	5.18091	PF3D7_0202000	559	T	___1	EAS(0.004)T(0.011)S(0.012)KEAT(0.969)KEAS(0.165)T(0.728)S(0.111)K	14	TKEASTSKEATKEASTSKEATKEASTSKEAT	PF02_0020;PFB0100c
PF3D7_0709700	PARE	prodrug activation and resistance esterase	No	0.435747	-0.923177	-0.48743	-1.02497	-0.821384	-0.52681	-0.44805	PF3D7_0709700	309	S	___1	KDS(0.999)VCFYGGTLK	3	IPENTPILFAHSKKDSVCFYGGTLKFYNKLK	PF07_0040
PF3D7_0406500		NYN domain-containing protein, putative	No	0.435713	-1.96132	-1.52561	-2.46928	-1.45337	-1.19945	-1.85177	PF3D7_0406500	2946	T	___1	T(0.522)AT(0.476)NENIIY(0.001)DLY(0.001)EQEKPLNIPK	1	KNGDKKDIKREVIIKTATNENIIYDLYEQEK	MAL4P1.63;PFD0320c
PF3D7_1146000	RSA4	ribosome assembly protein 4, putative	No	0.435668	-2.96365	-2.52798	-2.7324	-3.19491	-2.46754	-2.58843	PF3D7_1146000	308	T	___1	NIS(0.017)PNNT(0.758)QNNT(0.173)T(0.04)S(0.009)T(0.002)NCSYFVR	7	NNSKNNSKRNISPNNTQNNTTSTNCSYFVRS	PF11_0471
PF3D7_1343400	RAD5	DNA repair protein RAD5, putative	No	0.435312	-2.16849	-1.73318	-2.24284	-2.09414	-1.8443	-1.62206	PF3D7_1343400	621	S	___1	LEES(0.011)S(0.989)DYENADDDIR	5	IKCKETMDNVKLEESSDYENADDDIRNREPL	MAL13P1.216
PF3D7_1138500	PPM2	protein phosphatase PPM2	No	0.435087	-1.3027	-0.867615	-1.16608	-1.43933	-0.928829	-0.8064	PF3D7_1138500	797	S	___1	LKS(1)EDQNNINNEQENILNTSNNDFQK	3	HMNTNNNSDQNEKLKSEDQNNINNEQENILN	PF11_0396
PF3D7_0904600		ubiquitin specific protease, putative	No	0.434933	0.308713	0.743646	0.416361	0.201065	0.87606	0.611231	PF3D7_0904600	277	T	___1	KNNNINSTVNYDNTNTEENIT(0.609)S(0.391)DHCNIKDDTR	21	NSTVNYDNTNTEENITSDHCNIKDDTRLEKD	PFI0225w
PF3D7_1417600		conserved Plasmodium protein, unknown function	No	0.434659	1.74333	2.17799	1.82819	1.65847	2.21844	2.13754	PF3D7_1417600	3746	S	___1	KNVS(0.908)S(0.092)NIR	4	MGNIKNDNIEEKKNVSSNIRSIADNSQRLQN	PF14_0175
PF3D7_1141300		conserved Plasmodium protein, unknown function	No	0.434218	-2.31264	-1.87842	-2.2217	-2.40358	-1.70046	-2.05638	PF3D7_1141300	75	Y	___2	VY(0.027)S(0.522)S(0.687)NDEY(0.513)Y(0.203)Y(0.048)DEK	8	LDTEKSEKVYSSNDEYYYDEKNKLNHNDNKD	PF11_0424
PF3D7_0521000		conserved Plasmodium protein, unknown function	No	0.434078	-4.12258	-3.6885	-4.03888	-4.20629	-3.81172	-3.56529	PF3D7_0521000	456	S	___1	ENDS(0.009)VNNEQNNS(0.503)S(0.433)GNT(0.055)K	12	DIKKENDSVNNEQNNSSGNTKQIDNIQKDNN	MAL5P1.211;PFE1055c
PF3D7_0517300	SR1	serine/arginine-rich splicing factor 1	No	0.433517	-1.33455	-0.901034	-1.36065	-1.30845	-0.907419	-0.89465	PF3D7_0517300	263	S	___1	S(0.027)Y(0.003)S(0.971)RS(0.998)LS(0.97)Y(0.032)QER	5	DRRRDTYDKKRSYSRSLSYQERRRNNRTISK	MAL5P1.173;PFE0865c
PF3D7_1333600	UTP4	U3 small nucleolar RNA-associated protein 4, putative	No	0.433397	-1.25761	-0.824215	-1.23254	-1.28268	-0.85832	-0.79011	PF3D7_1333600	1105	S	___1	GTCENDS(0.996)S(0.037)S(0.965)ET(0.002)EEKSNTNK	7	LMNLNKEYKGTCENDSSSETEEKSNTNKANI	PF13_0184
PF3D7_1460500		conserved Plasmodium protein, unknown function	No	0.433243	-0.383847	0.0493956	-0.325359	-0.442335	-0.00392914	0.10272	PF3D7_1460500	555	T	___1	AYTENDNDT(0.102)T(0.876)S(0.018)CS(0.003)KENVAFYEHNNNNLK	10	NDKKNRAYTENDNDTTSCSKENVAFYEHNNN	PF14_0577
PF3D7_0501400	FIRA	interspersed repeat antigen	Yes	0.433023	1.67121	2.10424	1.70944	1.63298	1.97302	2.23545	PF3D7_0501400	422	S	___2	KGS(1)EGDNIS(1)LS(0.944)S(0.055)LS(0.001)EETQEK	11	HIDEKKGSEGDNISLSSLSEETQEKSHTKKK	MAL5P1.15;PFE0070w
PF3D7_1445400	CLK1	protein serine/threonine kinase-1	No	0.432748	1.97631	2.40906	2.03704	1.91558	2.39272	2.42539	PF3D7_1445400	271	S	___2	DIYQPSS(0.119)S(0.88)LHK	8	WEDNYTYKDIYQPSSSLHKYKRRSNFTRDDN	PF14_0431
PF3D7_0106300	ATP6	calcium-transporting ATPase	No	0.432673	0.876048	1.30872	0.83242	0.919676	1.30164	1.3158	PF3D7_0106300	482	S	___1	S(1)NENTIISR	1	SRSGAKRNIPLKEMKSNENTIISRGSKILED	MAL1P1.54;PFA0310c
PF3D7_1330800		RNA-binding protein, putative	No	0.432123	2.08159	2.51371	2.12238	2.04079	2.494	2.53342	PF3D7_1330800	35	S	___1	ATES(0.991)T(0.009)AVDSEAK	4	DIKADDSNVDNKATESTAVDSEAKMEISSKV	PF13_0165
PF3D7_0621200	PDX1	pyridoxine biosynthesis protein PDX1	No	0.431791	3.01833	3.45012	3.10858	2.92809	3.41695	3.4833	PF3D7_0621200	284	S	___1	VS(1)DKWK	2	VSMNLGKAMCGSTRVSDKWKNKNEEHTKFLT	2270.t00102;MAL6P1.215;PFF1025c
PF3D7_1445400	CLK1	conserved Plasmodium protein, unknown function	No	0.431757	-0.149247	0.28251	-0.307009	0.0085144	0.40736	0.15766	PF3D7_1445400;PF3D7_1412200;PF3D7_0518700	404;354;1888	S	___1	KYS(1)NESK	3	DDVKRELKKRKKKKYSNESKVYDSLKRDETN	PF14_0431
PF3D7_0401800	PfD80	Plasmodium exported protein (PHISTb), unknown function	Yes	0.431217	2.50165	2.93287	2.51792	2.48537	2.84429	3.02144	PF3D7_0401800	142	S	___3	S(0.022)AS(0.393)AAS(0.393)T(0.084)T(0.109)RS(0.994)AS(0.005)AASTTR	10	AASTTRSASAASTTRSASAASTTRSASAAST	MAL4P1.16;PFD0080c
PF3D7_1303500	NHE	sodium/hydrogen exchanger, Na+, H+ antiporter	No	0.431183	-1.63115	-1.19996	-1.7256	-1.5367	-1.22983	-1.1701	PF3D7_1303500	1304	S	___1	NKDLIMS(1)DNFIVK	7	REMLNLDERNKDLIMSDNFIVKIPVDISNDD	PF13_0019
PF3D7_0401800	PfD80	Plasmodium exported protein (PHISTb), unknown function	Yes	0.431038	-2.77725	-2.34621	-2.65745	-2.89705	-2.40733	-2.2851	PF3D7_0401800	184	T	___2	SASTASTASAAS(0.002)AAS(0.875)T(0.875)T(0.249)R	16	SASTASTASAASAASTTRSASAASTTRSASA	MAL4P1.16;PFD0080c
PF3D7_1124300		conserved Plasmodium protein, unknown function	No	0.430987	2.18255	2.61353	2.27073	2.09436	2.631	2.59607	PF3D7_1124300	289	S	___1	VRS(1)YDK	3	VDKVLLDDIDIEKVRSYDKIMDAEERDKLEL	PF11_0254
PF3D7_1320900		RNA-binding protein, putative	No	0.430747	2.11943	2.55018	2.09924	2.13963	2.49577	2.60459	PF3D7_1320900	120	S	___1	MKELEEDEENLNDDS(1)LKGDS(1)	15	KMKELEEDEENLNDDSLKGDS__________	PF13_0122
PF3D7_1111600		endonuclease/exonuclease/phosphatase family protein, putative	No	0.430613	0.552708	0.98332	0.697851	0.407564	0.882721	1.08392	PF3D7_1111600	348	S	___1	NDKS(1)QLDNIK	4	NNQYYKEINLTRNDKSQLDNIKSKEYNILQV	PF11_0122
PF3D7_0416200		conserved protein, unknown function	No	0.430533	-1.60387	-1.17333	-1.55898	-1.64876	-1.18864	-1.15803	PF3D7_0416200	13	S	___1	VLDDEIMLS(1)DGR	9	___MDMKVLDDEIMLSDGRIIKMPVKNEEDK	MAL4P1.152;PFD0785c
PF3D7_1334500	MSRP6	MSP7-like protein	Yes	0.430303	-0.400593	0.0297098	-0.33774	-0.463446	0.0846004	-0.0251808	PF3D7_1334500	405	S	___1	NHSNYNYKPINQENLS(1)MYFNNNNKK	16	NHSNYNYKPINQENLSMYFNNNNKKKNKKNS	PF13_0192
PF3D7_1454400	APP	aminopeptidase P	No	0.429328	-1.06415	-0.634819	-0.920849	-1.20745	-0.573719	-0.695919	PF3D7_1454400	585	T	___3	T(1)T(1)HFGEPT(1)AEEK	1	DSGGQYLHGTTDVTRTTHFGEPTAEEKRIYT	PF14_0517
PF3D7_1454400	APP	aminopeptidase P	No	0.429328	-1.06415	-0.634819	-0.920849	-1.20745	-0.573719	-0.695919	PF3D7_1454400	586	T	___3	T(1)T(1)HFGEPT(1)AEEK	2	SGGQYLHGTTDVTRTTHFGEPTAEEKRIYTL	PF14_0517
PF3D7_1454400	APP	aminopeptidase P	No	0.429328	-1.06415	-0.634819	-0.920849	-1.20745	-0.573719	-0.695919	PF3D7_1454400	592	T	___3	T(1)T(1)HFGEPT(1)AEEK	8	HGTTDVTRTTHFGEPTAEEKRIYTLVLKGHL	PF14_0517
PF3D7_1011800	PREBP	PRE-binding protein	No	0.429168	-3.93896	-3.50979	-4.35154	-3.52639	-3.57205	-3.44754	PF3D7_1011800	604	S	___1	LDS(1)ILAR	3	KNLLNKNISKNIKLDSILARGFNKSILKEIE	PF10_0115
PF3D7_1002400.2-p1		RNA-binding protein, putative		0.429132	2.78424	3.21337	2.78226	2.78621	3.22158	3.20516	PF3D7_1002400.2-p1;PF3D7_1002400	240;242	S	___1	YRNS(1)PDRS(1)PR	8	VSNSERRRYRNSPDRSPRYRRK_________
PF3D7_0708400	HSP90	heat shock protein 90	No	0.429063	1.07353	1.5026	1.22502	0.922045	1.3564	1.64879	PF3D7_0708400	281	T	___1	VEDVT(1)EELENAEK	5	EEDDNKTDHPKVEDVTEELENAEKKKKEKRK	PF07_0029
PF3D7_0219700	GEXP20	Plasmodium exported protein (PHISTc), unknown function	Yes	0.428743	0.705692	1.13444	0.72142	0.689964	1.02715	1.24172	PF3D7_0219700	161	S	___1	INEEQYDRLS(1)DEEINDK	10	TDEMNKINEEQYDRLSDEEINDKLDNLDESV	PF02_0184;PFB0900c
PF3D7_0424700	FIKK4.2	serine/threonine protein kinase, FIKK family	Yes	0.428722	0.203353	0.632075	0.291721	0.114985	0.44623	0.817921	PF3D7_0424700	285	T	___1	S(0.066)IPT(0.6)VGFS(0.334)KDGDRLQEMYK	4	VNNVKYSDWKFKSIPTVGFSKDGDRLQEMYK	MAL4P1.230;PFD1175w
PF3D7_1438400	MCA2	metacaspase-like protein	No	0.428608	-0.418178	0.0104303	-0.35343	-0.482925	-0.0208092	0.0416698	PF3D7_1438400	395	T	___1	T(0.55)LS(0.45)NILK	1	VLLKSSPNTENTFNKTLSNILKEQPKRSSMF	PF14_0362;PF14_0363
PF3D7_1366900		conserved Plasmodium protein, unknown function	No	0.428564	6.93832	7.36689	7.06164	6.815	7.30893	7.42484	PF3D7_1366900	338	S	___1	EHS(1)NHTVNR	3	GPRNNVNNSEHMREHSNHTVNRFAPMGQYAN	MAL13P1.336
PF3D7_0503300	SRSF12	serine/arginine-rich splicing factor 12	No	0.427943	1.05565	1.48359	0.956711	1.15458	1.4723	1.49488	PF3D7_0503300	255	S	___2	S(0.04)IS(0.964)FNS(0.996)EKDDAK	3	NSSKHSRKEHVSRSISFNSEKDDAKKKNDNT	MAL5P1.33;PFE0160c
PF3D7_0503300	SRSF12	serine/arginine-rich splicing factor 12	No	0.427943	1.05565	1.48359	0.956711	1.15458	1.4723	1.49488	PF3D7_0503300	258	S	___2	S(0.04)IS(0.964)FNS(0.996)EKDDAK	6	KHSRKEHVSRSISFNSEKDDAKKKNDNTSER	MAL5P1.33;PFE0160c
PF3D7_0919000	NAPS	nucleosome assembly protein	No	0.427857	0.174672	0.60253	0.21686	0.132484	0.60656	0.598499	PF3D7_0919000	170	T	___1	NPIAAVT(0.5)HNRS(0.5)DLDNEIPK	7	TRIKWKEGKNPIAAVTHNRSDLDNEIPKWSI	PFI0930c
PF3D7_1200700	ACS7	acyl-CoA synthetase	Yes	0.427847	3.11761	3.54545	3.22421	3.01101	3.54178	3.54913	PF3D7_1200700	779	S	___1	S(0.073)GS(0.927)KADIK	3	KDDIKSGSKDDIKSGSKADIKSGSKDDIKSG	2277.t00007;MAL12P1.7;PFL0035c
PF3D7_1473200		DnaJ protein, putative	No	0.427638	-2.82836	-2.40072	-2.92115	-2.73557	-2.58857	-2.21288	PF3D7_1473200	100	S	___2	MENQNTGNDVNSGNSENAEKS(0.999)EQS(0.001)EK	21	TGNDVNSGNSENAEKSEQSEKVEKVEKAEQS	PF14_0700
PF3D7_1473200		DnaJ protein, putative	No	0.427638	-2.82836	-2.40072	-2.92115	-2.73557	-2.58857	-2.21288	PF3D7_1473200	103	S	___2	MENQNT(0.012)GNDVNS(0.298)GNS(0.298)ENAEKS(0.696)EQS(0.696)EKVEK	24	DVNSGNSENAEKSEQSEKVEKVEKAEQSENS	PF14_0700
PF3D7_1201500		XPA binding protein 1, putative	No	0.427582	2.43319	2.86077	2.52142	2.34496	2.82085	2.90069	PF3D7_1201500	114	S	___1	REVSDLNT(0.002)YS(0.998)DNDVNVNINNSSNNIEK	10	ESSNEKREVSDLNTYSDNDVNVNINNSSNNI	2277.t00015;MAL12P1.15;PFL0075w
PF3D7_1438400	MCA2	metacaspase-like protein	No	0.427427	0.938718	1.36615	0.909842	0.967594	1.32422	1.40807	PF3D7_1438400	1536	S	___1	NNINISDKYFLS(0.998)ET(0.002)DSPYIGK	12	EKIKNNINISDKYFLSETDSPYIGKKKALMI	PF14_0362;PF14_0363
PF3D7_1438400	MCA2	metacaspase-like protein	No	0.427368	-1.94402	-1.51665	-1.85418	-2.03386	-1.5596	-1.47371	PF3D7_1438400	708	T	___1	LITNIY(0.003)QFT(0.724)GGQS(0.273)QK	9	HHTYHEKLITNIYQFTGGQSQKSCNIKNQNV	PF14_0362;PF14_0363
PF3D7_1205500		zinc finger protein, putative	No	0.427263	-2.28375	-1.85648	-2.20056	-2.36694	-1.88639	-1.82658	PF3D7_1205500	1258	S	___1	NHNNSGSIDYLNDNEES(1)DNNNNNNNNNNSSTK	17	HNNSGSIDYLNDNEESDNNNNNNNNNNSSTK	2277.t00056;MAL12P1.55;PFL0275w
PF3D7_0606000	KIC1	conserved Plasmodium protein, unknown function	No	0.426257	2.67964	3.1059	2.73023	2.62905	3.08362	3.12817	PF3D7_0606000	343	S	___1	FITFNTFDNHS(1)EGSVIFPMEK	11	KSDKKFITFNTFDNHSEGSVIFPMEKYRNFT	2270.t00255;MAL6P1.63;PFF0295c
PF3D7_0517700	EIF3B	eukaryotic translation initiation factor 3 subunit B, putative	No	0.425579	-2.73506	-2.30948	-2.75338	-2.71673	-2.36334	-2.25562	PF3D7_0517700	19	S	___1	VRVS(1)DNELS(1)DKELVDFLS(1)EDS(1)DNGDENLLNK	18	VSDNELSDKELVDFLSEDSDNGDENLLNKKY	MAL5P1.177;PFE0885w
PF3D7_0517700	EIF3B	eukaryotic translation initiation factor 3 subunit B, putative	No	0.425579	-2.73506	-2.30948	-2.75338	-2.71673	-2.36334	-2.25562	PF3D7_0517700	22	S	___1	VRVS(1)DNELS(1)DKELVDFLS(1)EDS(1)DNGDENLLNK	21	NELSDKELVDFLSEDSDNGDENLLNKKYSDK	MAL5P1.177;PFE0885w
PF3D7_1033200	ETRAMP10.2	early transcribed membrane protein 10.2	Yes	0.425492	1.86624	2.29174	1.93941	1.79308	2.3184	2.26507	PF3D7_1033200	254	S	___1	RNS(0.984)S(0.016)EDKPTSESK	3	NDMDPLNPYGSSKRNSSEDKPTSESKGTTPE	PF10_0323
PF3D7_0110400	RPB9	DNA-directed RNA polymerase II subunit RPB9, putative	No	0.424977	-1.49285	-1.06787	-1.47217	-1.51353	-1.19816	-0.93758	PF3D7_0110400	232	S	___1	KSNDKLQNEVQS(1)EGENDYDINVEEYFCEE	12	LNEKKSNDKLQNEVQSEGENDYDINVEEYFC	MAL1P2.30;PFA0505c
PF3D7_1253100		Plasmodium exported protein (PHISTa), unknown function	Yes	0.424247	0.627608	1.05186	0.643751	0.611465	0.98513	1.11858	PF3D7_1253100	286	S	___1	DT(0.013)LS(0.987)LK	4	KLINNFCNKYKKDTLSLK_____________	2277.t00509;MAL12P1.506;PFL2555w
PF3D7_0918900	gammaGCS	gamma-glutamylcysteine synthetase	No	0.424198	-1.12315	-0.698955	-1.07979	-1.16652	-0.655369	-0.74254	PF3D7_0918900	316	Y	___1	S(0.077)CNDY(0.669)NNVNDS(0.124)S(0.124)NT(0.005)QDIFISSLKK	5	NKNKEKDNTPRSCNDYNNVNDSSNTQDIFIS	PFI0925w
PF3D7_1022400	SRSF4	serine/arginine-rich splicing factor 4	No	0.423948	-3.04261	-2.61866	-3.07442	-3.01081	-2.44663	-2.7907	PF3D7_1022400	245	S	___1	YESHS(0.001)QS(0.085)LS(0.915)DNR	9	SNKRNNKYESHSQSLSDNRNSYRNRSKGKKR	PF10_0217
PF3D7_0202000	KAHRP	knob-associated histidine-rich protein	Yes	0.423537	1.84353	2.26707	1.82645	1.86061	2.24681	2.28732	PF3D7_0202000	604	T	___2	GASTTAGS(0.012)T(0.867)T(0.867)GAT(0.214)T(0.04)GANAVQSK	9	TTEGATKGASTTAGSTTGATTGANAVQSKDE	PF02_0020;PFB0100c
PF3D7_1149000	Pf332	antigen 332, DBL-like protein	Yes	0.423407	-1.87618	-1.45277	-1.7242	-2.02815	-1.39555	-1.50999	PF3D7_1149000	3076	S	___1	EGSAT(0.022)EEIVQDGS(0.715)GT(0.263)NDFVGK	13	LEKEGSATEEIVQDGSGTNDFVGKQGSVIEE	PF11_0506;PF11_0507
PF3D7_0404300		conserved Plasmodium protein, unknown function	No	0.423307	1.29806	1.72136	1.19796	1.39816	1.75214	1.69059	PF3D7_0404300	3	S	___1	MKS(0.997)DVS(0.003)K	3	_____________MKSDVSKTKETDSKIANS	MAL4P1.41b;PFD0207c
PF3D7_1033600	CEF1	myb2 transcription factor, putative	No	0.422762	-3.6585	-3.23574	-3.55855	-3.75846	-3.08153	-3.38995	PF3D7_1033600	517	S	___3	NIS(1)LYAHSIISYK	3	KNKIISDIKSFKKNISLYAHSIISYKNLKND	PF10_0327
PF3D7_1033600	CEF1	myb2 transcription factor, putative	No	0.422762	-3.6585	-3.23574	-3.55855	-3.75846	-3.08153	-3.38995	PF3D7_1033600	522	S	___3	NIS(0.997)LY(0.003)AHS(1)IISYK	8	SDIKSFKKNISLYAHSIISYKNLKNDQSMMD	PF10_0327
PF3D7_1033600	CEF1	myb2 transcription factor, putative	No	0.422762	-3.6585	-3.23574	-3.55855	-3.75846	-3.08153	-3.38995	PF3D7_1033600	525	S	___3	NIS(0.993)LY(0.038)AHS(0.969)IIS(0.992)Y(0.009)K	11	KSFKKNISLYAHSIISYKNLKNDQSMMDNQT	PF10_0327
PF3D7_0916700	HoMu	RNA-binding protein musashi, putative	No	0.422727	3.97412	4.39684	4.02109	3.92715	4.37384	4.41985	PF3D7_0916700	34	S	___1	SVEEHNIDDKS(1)LRDEDNK	11	VQDKKSVEEHNIDDKSLRDEDNKSIKEGNNN	PFI0820c
PF3D7_0202000	KAHRP	knob-associated histidine-rich protein	Yes	0.422662	1.66127	2.08393	1.75645	1.5661	2.08758	2.08029	PF3D7_0202000	540	T	___1	GQCAAEGAT(1)KGATK	9	TNAATNKGQCAAEGATKGATKEASTSKEATK	PF02_0020;PFB0100c
PF3D7_1478600	PTP3	EMP1-trafficking protein	Yes	0.422563	2.843	3.26556	2.97788	2.70812	3.30954	3.22159	PF3D7_1478600	356	S	___1	LNS(0.999)KS(0.001)NNMNGVK	3	MTKPKTDTTQQIRLNSKSNNMNGVKSNVTTS	PF14_0758
PF3D7_0202000	KAHRP	knob-associated histidine-rich protein	Yes	0.422093	2.57485	2.99694	2.5298	2.61989	2.97511	3.01877	PF3D7_0202000	604	T	___1	GASTTAGS(0.012)T(0.867)T(0.867)GAT(0.214)T(0.04)GANAVQSK	9	TTEGATKGASTTAGSTTGATTGANAVQSKDE	PF02_0020;PFB0100c
PF3D7_0202000	KAHRP	knob-associated histidine-rich protein	Yes	0.422038	2.62651	3.04855	2.5352	2.71782	3.00764	3.08946	PF3D7_0202000	559	T	___2	EAS(0.004)T(0.011)S(0.012)KEAT(0.969)KEAS(0.165)T(0.728)S(0.111)K	14	TKEASTSKEATKEASTSKEATKEASTSKEAT	PF02_0020;PFB0100c
PF3D7_0927600		RNA-binding protein, putative	No	0.421957	0.498953	0.92091	0.45561	0.542295	1.09341	0.748409	PF3D7_0927600	302	S	___1	NKEENCQS(1)R	8	LQNPVSNKNKEENCQSRDSSKRRNSVSKSSK	PFI1355w
PF3D7_0923400		conserved Plasmodium protein, unknown function	No	0.421953	0.127197	0.54915	0.165421	0.088974	0.431671	0.66663	PF3D7_0923400	72	T	___2	GKT(0.997)QS(0.944)Y(0.067)RS(0.978)Y(0.014)EYK	3	NDEHDIYEDNYSRGKTQSYRSYEYKLEHIMK	PFI1150w
PF3D7_1442900	ARFGEF	protein transport protein SEC7, putative	No	0.421859	-0.423428	-0.00156879	-0.37644	-0.470415	-0.0323486	0.029211	PF3D7_1442900	1989	S	___1	SDVHHHS(1)FLK	7	NVSAHHTNKSDVHHHSFLKSHTLSHHHNNNY	PF14_0407
PF3D7_1026000		conserved Plasmodium protein, unknown function	No	0.421638	-0.451452	-0.0298147	-0.45657	-0.446335	-0.00895882	-0.0506706	PF3D7_1026000	218	S	___1	NNIHDNKENS(1)PCNIIDVNNDDKLK	10	DENCYKNNIHDNKENSPCNIIDVNNDDKLKK	PF10_0257
PF3D7_1313000	NEDD8	ubiquitin-like protein nedd8 homologue, putative	No	0.421558	-0.962757	-0.541199	-1.16185	-0.763664	-0.492208	-0.590189	PF3D7_1313000	14	S	___1	RQS(1)FNFEPSSSVFQIK	3	__MQILVKTLTGKRQSFNFEPSSSVFQIKMA	MAL13P1.64
PF3D7_1142100		conserved Plasmodium protein, unknown function	No	0.420928	-2.20719	-1.78626	-2.04213	-2.37226	-1.78777	-1.78476	PF3D7_1142100	493	Y	___1	ENNCEY(0.535)T(0.465)DVDETSNVFNNLSDNYIK	6	YYANEFSHVKENNCEYTDVDETSNVFNNLSD	PF11_0433
PF3D7_1139300	ApiAP2	AP2 domain transcription factor, putative	No	0.420883	1.16443	1.58531	1.30772	1.02114	1.58282	1.5878	PF3D7_1139300	1790	S	___2	S(0.005)FDKCS(0.989)NENS(0.557)VCINKS(0.45)NEK	6	NNTDNSKILRSFDKCSNENSVCINKSNEKLE	PF11_0404
PF3D7_0500800	MESA	mature parasite-infected erythrocyte surface antigen	Yes	0.420513	-1.55999	-1.13947	-1.73225	-1.38773	-1.31205	-0.9669	PF3D7_0500800	351	S	___1	VSGPY(0.002)ENS(0.894)ENS(0.887)NVT(0.492)S(0.517)ES(0.105)EET(0.104)KK	11	REGNKVSGPYENSENSNVTSESEETKKLAEK	MAL5P1.9;PFE0040c
PF3D7_1445400	CLK1	protein serine/threonine kinase-1	No	0.420188	2.03204	2.45223	2.09392	1.97017	2.44638	2.45808	PF3D7_1445400	269	S	___2	DIY(0.012)QPS(0.663)S(0.663)S(0.663)LHKYK	6	SRWEDNYTYKDIYQPSSSLHKYKRRSNFTRD	PF14_0431
PF3D7_1445400	CLK1	protein serine/threonine kinase-1	No	0.420188	2.03204	2.45223	2.09392	1.97017	2.44638	2.45808	PF3D7_1445400	270	S	___2	DIYQPS(0.507)S(0.765)S(0.729)LHK	7	RWEDNYTYKDIYQPSSSLHKYKRRSNFTRDD	PF14_0431
PF3D7_1212700	EIF3A	eukaryotic translation initiation factor 3 subunit A, putative	No	0.419748	0.166142	0.585891	0.0289707	0.303314	0.568851	0.60293	PF3D7_1212700	458	S	___1	KKS(1)EDFTK	3	VLAVLSIPVIGNKKKSEDFTKQFEAHKKMSQ	2277.t00126;MAL12P1.125;PFL0625c
PF3D7_0831700	HSP70x	heat shock protein 70	Yes	0.419657	-0.367052	0.0526047	-0.3174	-0.416704	-0.13533	0.24054	PF3D7_0831700	111	T	___1	FS(0.034)ET(0.287)T(0.679)VQSDMK	5	VFDAKRLIGRKFSETTVQSDMKHWPFTVKGG	MAL7P1.228
PF3D7_0401800	PfD80	Plasmodium exported protein (PHISTb), unknown function	Yes	0.419563	0.895018	1.31458	0.98073	0.809305	1.25381	1.37535	PF3D7_0401800	175	T	___2	SAST(0.002)AS(0.998)T(0.999)AS(0.999)AAS(0.001)AASTTR	7	SASTASTARSASTASTASAASAASTTRSASA	MAL4P1.16;PFD0080c
PF3D7_0807600		conserved Plasmodium protein, unknown function	No	0.419497	-2.04436	-1.62486	-2.00002	-2.0887	-1.70921	-1.54051	PF3D7_0807600	433	S	___1	DVNLINSSDINLEDNNEDIS(1)NHDKEK	20	INSSDINLEDNNEDISNHDKEKDNNNKKDDD	MAL8P1.127
PF3D7_0501400	FIRA	interspersed repeat antigen	Yes	0.419393	-0.260972	0.158421	-0.168119	-0.353825	0.158751	0.158091	PF3D7_0501400	685	S	___3	KAS(0.014)EGDNIS(0.983)LS(0.947)S(0.949)LS(0.106)EET(0.001)QEK	11	HADEKKASEGDNISLSSLSEETQEKSHTKKK	MAL5P1.15;PFE0070w
PF3D7_0729100		conserved Plasmodium protein, unknown function	No	0.419067	-2.27806	-1.85899	-2.28505	-2.27107	-1.91104	-1.80695	PF3D7_0729100	1076	S	___1	IQNMEEHEYIPCAS(0.884)NKS(0.895)IS(0.101)NNY(0.121)HVLSK	17	QNMEEHEYIPCASNKSISNNYHVLSKSEYDK	PF07_0120
PF3D7_0501400	FIRA	interspersed repeat antigen	Yes	0.418867	1.35062	1.76949	1.46956	1.23169	1.59189	1.94709	PF3D7_0501400	420	S	___3	KGS(1)EGDNIS(1)LS(0.944)S(0.055)LS(0.001)EETQEK	9	EEHIDEKKGSEGDNISLSSLSEETQEKSHTK	MAL5P1.15;PFE0070w
PF3D7_1022400	SRSF4	serine/arginine-rich splicing factor 4	No	0.418863	-0.155703	0.263161	-0.223989	-0.0874157	0.215961	0.31036	PF3D7_1022400	349	S	___1	T(1)VS(1)EDRS(1)ER	7	DNRSHSRRRTVSEDRSERRRSLSEDRSNSRK	PF10_0217
PF3D7_1013200		conserved Plasmodium protein, unknown function	No	0.418848	-2.27973	-1.86088	-2.2568	-2.30267	-1.90788	-1.81389	PF3D7_1013200	321	S	___1	KPNNIENNEES(0.073)NCDNNS(0.927)VNKENSNGVK	17	PNNIENNEESNCDNNSVNKENSNGVKDASKE	PF10_0129
PF3D7_1127800		conserved Plasmodium protein, unknown function	No	0.418498	2.78873	3.20723	2.84128	2.73618	3.24533	3.16912	PF3D7_1127800	969	S	___1	LQEEEEEYS(1)FYEDMKK	9	NEMVNIKLQEEEEEYSFYEDMKKYQDEDIVE	PF11_0289
PF3D7_1473700	NUP116	nucleoporin NUP116/NSP116, putative	No	0.418008	1.1506	1.56861	1.17914	1.12206	1.60774	1.52948	PF3D7_1473700	983	S	___2	GREEDDNKY(0.07)S(0.965)S(0.964)DS(0.001)FIK	10	KMKRKRGREEDDNKYSSDSFIKRKKCSKMNP	PF14_0706
PF3D7_1473700	NUP116	nucleoporin NUP116/NSP116, putative	No	0.418008	1.1506	1.56861	1.17914	1.12206	1.60774	1.52948	PF3D7_1473700	984	S	___2	GREEDDNKY(0.07)S(0.965)S(0.964)DS(0.001)FIK	11	MKRKRGREEDDNKYSSDSFIKRKKCSKMNPH	PF14_0706
PF3D7_0316500	NUF2	kinetochore protein NUF2, putative	No	0.417898	1.90982	2.32772	1.96464	1.85501	2.26999	2.38545	PF3D7_0316500	258	S	___1	KEDLEDQIVPS(1)PEK	11	RYRQKKEDLEDQIVPSPEKLQKYNEELKDHL	MAL3P6.5;PFC0720w
PF3D7_0507100	RPL4	60S ribosomal protein L4	No	0.417892	0.482573	0.900465	0.44873	0.516415	0.90761	0.89332	PF3D7_0507100	318	S	___1	LQNKNS(1)LTNFAVR	6	LAKKKPCKKRLQNKNSLTNFAVRCRLNPAYK	MAL5P1.72;PFE0350c
PF3D7_1334500	MSRP6	MSP7-like protein	Yes	0.417687	0.586793	1.00448	0.76358	0.410006	1.00048	1.00848	PF3D7_1334500	99	S	___1	YGEGS(1)IFYDESK	5	VLEYVGDSTGKYGEGSIFYDESKKYNYRKYL	PF13_0192
PF3D7_0401800	PfD80	Plasmodium exported protein (PHISTb), unknown function	Yes	0.417638	1.02898	1.44662	1.01181	1.04615	1.38578	1.50746	PF3D7_0401800	307	T	___1	LEDYEKEGS(1)NVDIT(1)EEEEK	14	SRLEDYEKEGSNVDITEEEEKEAESVDDNNK	MAL4P1.16;PFD0080c
PF3D7_0306800	CCT2	T-complex protein 1 subunit beta	No	0.417348	-0.843967	-0.42662	-0.86335	-0.824585	-0.42149	-0.431749	PF3D7_0306800	335	S	___1	LANCLDAEIAS(0.971)T(0.029)FEK	11	DGMERLANCLDAEIASTFEKDLNIKLGYCDK	MAL3P2.26;PFC0285c
PF3D7_0303200		HAD superfamily protein, putative	No	0.417182	-2.50093	-2.08375	-2.51634	-2.48552	-2.02718	-2.14031	PF3D7_0303200	316	S	___1	NLS(0.405)ES(0.595)HVR	5	SKDDPVYIPKRNLSESHVRKTGKKKKLIKDR	MAL3P1.12;PFC0150w
PF3D7_0813300		conserved Plasmodium protein, unknown function	No	0.417158	2.20655	2.62371	2.24507	2.16802	2.64355	2.60386	PF3D7_0813300	245	S	___1	SLDNKS(1)DGPLK	6	KGGDKKKNKRSLDNKSDGPLKKSKIDDEGQF	MAL8P1.95
PF3D7_0401800	PfD80	Plasmodium exported protein (PHISTb), unknown function	Yes	0.417068	2.83286	3.24993	2.85468	2.81104	3.23056	3.26929	PF3D7_0401800	302	S	___1	LEDYEKEGS(1)NVDITEEEEK	9	PSTGSSRLEDYEKEGSNVDITEEEEKEAESV	MAL4P1.16;PFD0080c
PF3D7_0714300	DHHC4	palmitoyltransferase DHHC4, putative	No	0.416588	-0.883793	-0.467205	-0.91407	-0.853516	-0.46847	-0.46594	PF3D7_0714300	485	S	___1	KGS(0.291)DS(0.658)ENVT(0.051)CDIEETNQVPVKK	5	RYSKIKLPKVKKGSDSENVTCDIEETNQVPV	MAL7P1.68
PF3D7_1007900	EIF3D	eukaryotic translation initiation factor 3 subunit D, putative	No	0.416389	1.1859	1.60229	1.17853	1.19326	1.56993	1.63464	PF3D7_1007900	542	S	___1	LYCTHEDS(1)N	8	DPLKPLLRLYCTHEDSN______________	PF10_0077
PF3D7_1246600	BUD13	pre-mRNA-splicing factor CWC26, putative	No	0.416348	-2.20441	-1.78806	-2.0726	-2.33622	-1.74392	-1.8322	PF3D7_1246600	306	Y	___1	NIINYEFDS(0.44)DY(0.56)DIELK	11	LIKKKNIINYEFDSDYDIELKMKKRKDDPMN	2277.t00447;MAL12P1.446;PFL2235w
PF3D7_0307700		conserved Plasmodium protein, unknown function	No	0.415993	-3.12064	-2.70464	-3.11603	-3.12525	-2.57457	-2.83472	PF3D7_0307700	80	S	___1	KKEDYNNDNNNVDNMNNS(0.089)NNQS(0.089)DS(0.821)ICGIY(0.001)R	24	NNNVDNMNNSNNQSDSICGIYRLNSSQLLNE	MAL3P3.1;PFC0325c
PF3D7_1002400.2-p1		RNA-binding protein, putative		0.415848	-0.469242	-0.0533943	-0.456509	-0.481976	-0.0695992	-0.0371895	PF3D7_1002400.2-p1;PF3D7_1002400	228;230	S	___1	STSVSNS(1)ER	7	KKRYDRVRKSTSVSNSERRRYRNSPDRSPRY
PF3D7_1140700		conserved Plasmodium protein, unknown function	No	0.415817	-2.07048	-1.65466	-2.1098	-2.03116	-1.76187	-1.54746	PF3D7_1140700	2118	T	___1	IDHNINNCINNGGVLT(1)DNDIENIDYIK	16	IDHNINNCINNGGVLTDNDIENIDYIKKDFN	PF11_0418
PF3D7_1206800		conserved Plasmodium protein, unknown function	No	0.415557	-2.65445	-2.23889	-2.62446	-2.68443	-2.13852	-2.33926	PF3D7_1206800	406	Y	___1	Y(0.5)CDES(0.5)DDEDIYTDNIIFSQIHGLK	1	YNTDIQLKLDKQFNRYCDESDDEDIYTDNII	2277.t00069;MAL12P1.68;PFL0340w
PF3D7_1207000		conserved Plasmodium protein, unknown function	No	0.414747	1.40682	1.82156	1.44355	1.37008	1.80958	1.83355	PF3D7_1207000	486	S	___1	DKYES(1)EQKFNISNEK	5	LNNLLNNRNVKDKYESEQKFNISNEKEMQDT	2277.t00071;MAL12P1.70;PFL0350c
PF3D7_1142100		conserved Plasmodium protein, unknown function	No	0.414437	-0.572397	-0.15796	-0.478119	-0.666676	-0.14974	-0.16618	PF3D7_1142100	507	S	___2	ENNCEY(0.231)T(0.769)DVDETSNVFNNLS(1)DNYIK	20	EYTDVDETSNVFNNLSDNYIKNKNIRKQKRK	PF11_0433
PF3D7_0801800		mannose-6-phosphate isomerase, putative	No	0.414308	1.56954	1.98385	1.60992	1.52917	1.95258	2.01512	PF3D7_0801800	592	S	___1	FNTDLT(1)ES(1)DMDEVDEDEKDEK	8	QNSLSENKFNTDLTESDMDEVDEDEKDEKTI	MAL8P1.156
PF3D7_1410400	RAP1	rhoptry-associated protein 1	No	0.413987	1.98191	2.3959	2.02049	1.94333	2.3797	2.41209	PF3D7_1410400	106	S	___1	S(0.156)AS(0.844)AAAILEEDDSKDDMEFK	3	KSSKKGHGRSRVRSASAAAILEEDDSKDDME	PF14_0102
PF3D7_0519700		FoP domain-containing protein, putative	No	0.413973	1.32879	1.74276	1.27362	1.38396	1.85844	1.62708	PF3D7_0519700	144	T	___1	LT(0.68)S(0.32)KDLDDELDKYMGSSNVK	2	FFRKNQNLHDKIGKLTSKDLDDELDKYMGSS	MAL5P1.198;PFE0990w
PF3D7_1445400	CLK1	protein serine/threonine kinase-1	No	0.413877	-0.728152	-0.314275	-0.920269	-0.536036	-0.209499	-0.41905	PF3D7_1445400	64	Y	___1	NNS(0.009)NNNNNGY(0.551)Y(0.431)Y(0.009)HNYNNGYQIR	10	YYYDTRNNSNNNNNGYYYHNYNNGYQIRNKR	PF14_0431
PF3D7_1237200		conserved Plasmodium protein, unknown function	No	0.413809	-0.771208	-0.357399	-0.79286	-0.749556	-0.434309	-0.280489	PF3D7_1237200	1506	S	___1	IQNHHNNLDDNYS(1)KR	13	DERIQNHHNNLDDNYSKRNSEQSDAEESSEG	2277.t00360;MAL12P1.358;PFL1800w
PF3D7_0824800		conserved Plasmodium membrane protein, unknown function	No	0.413413	0.920563	1.33398	0.989311	0.851814	1.26158	1.40637	PF3D7_0824800	638	S	___1	NFITPYHENNNDNLS(1)DT(1)LQDER	15	KNFITPYHENNNDNLSDTLQDERSIKSDINM	PF08_0028
PF3D7_0110700	CAF1C	chromatin assembly factor 1 protein WD40 domain, putative	No	0.413033	0.380218	0.79325	0.303961	0.456474	0.8242	0.7623	PF3D7_0110700	12	S	___1	RKS(1)NALDEACLELSEEVENDVSHEK	3	____MSSPKESKKRKSNALDEACLELSEEVE	MAL1P2.33;PFA0520c
PF3D7_0808300		ubiquitin regulatory protein, putative	No	0.412932	0.153553	0.566485	0.173931	0.133175	0.419891	0.713079	PF3D7_0808300	6	S	___1	S(0.5)LS(0.5)DLKKDDK	1	__________MSNIRSLSDLKKDDKKNNERV	MAL8P1.122
PF3D7_0825000		conserved Plasmodium protein, unknown function	No	0.412787	0.877958	1.29075	0.914331	0.841585	1.24093	1.34056	PF3D7_0825000	390	S	___2	YEKDHNIYNDLS(1)DDGKS(1)IDR	12	KYNKYEKDHNIYNDLSDDGKSIDRTNVYDNN	MAL8P1.29
PF3D7_0825000		conserved Plasmodium protein, unknown function	No	0.412787	0.877958	1.29075	0.914331	0.841585	1.24093	1.34056	PF3D7_0825000	395	S	___2	YEKDHNIYNDLS(1)DDGKS(1)IDR	17	EKDHNIYNDLSDDGKSIDRTNVYDNNSSSHN	MAL8P1.29
PF3D7_1466100	PPKL	protein phosphatase containing kelch-like domains	No	0.412783	-0.100307	0.312475	-0.0983391	-0.102276	0.28948	0.33547	PF3D7_1466100	368	S	___1	HS(0.004)S(0.989)S(0.007)DLR	3	SLKQKQLTNDNLKHSSSDLRNVNSYNLNSQD	PF14_0630
PF3D7_0219600	RFC1	replication factor C subunit 1, putative	No	0.412746	-0.235601	0.177145	-0.197779	-0.273424	0.1444	0.20989	PF3D7_0219600	310	T	___1	LLPQTDQT(0.022)QENDKT(0.552)YAS(0.417)DT(0.008)IK	14	LKLLPQTDQTQENDKTYASDTIKTENKDKNY	PF02_0183;PFB0895c
PF3D7_1238300	CWC22	pre-mRNA-splicing factor CWC22, putative	No	0.412457	3.13557	3.54803	3.2221	3.04905	3.47964	3.61642	PF3D7_1238300	688	S	___1	HISEELLFGDDS(1)ADEK	12	NEWKHISEELLFGDDSADEKKNKKTKKQKKK	2277.t00371;MAL12P1.369;PFL1855w
PF3D7_0606000	KIC1	conserved Plasmodium protein, unknown function	No	0.412372	-1.13855	-0.72618	-1.02922	-1.24788	-0.7635	-0.68886	PF3D7_0606000	536	S	___1	NNSIYDNICDS(1)FKR	11	KKGDRNNSIYDNICDSFKRQESVSKSLLFSD	2270.t00255;MAL6P1.63;PFF0295c
PF3D7_0818900	HSP70	heat shock protein 70	No	0.412067	-4.48285	-4.07078	-4.24578	-4.71992	-3.83851	-4.30306	PF3D7_0818900	7	S	___1	GS(0.959)KPNLPES(0.032)NIAIGIDLGT(0.005)T(0.001)Y(0.001)S(0.001)CVGVWR	2	_________MASAKGSKPNLPESNIAIGIDL	PF08_0054
PF3D7_1103700	CK2beta1	casein kinase II beta chain	No	0.411838	1.70562	2.11746	1.65043	1.76081	2.10472	2.13019	PF3D7_1103700	18	S	___1	SDKS(0.969)T(0.023)S(0.008)WVK	4	NSDSNKDLQDSKSDKSTSWVKWFNNRALSNF	PF11_0048
PF3D7_1107300	PAIP1	polyadenylate-binding protein-interacting protein 1, putative	No	0.411668	0.417838	0.829506	0.29178	0.543896	0.829731	0.829281	PF3D7_1107300	233	S	___1	S(1)YNESK	1	NNNYSNNNSSSNSSRSYNESKKSSKDENNNN	PF11_0086
PF3D7_1357700	UTP21	U3 small nucleolar RNA-associated protein 21, putative	No	0.411633	-0.854797	-0.443165	-0.75174	-0.957855	-0.44795	-0.438379	PF3D7_1357700	1060	S	___1	T(0.002)S(0.002)EQES(0.996)QQQDEQEENQESNVESK	6	QNVTNNLENKTSEQESQQQDEQEENQESNVE	PF13_0309
PF3D7_1436300	PTEX150	translocon component PTEX150	No	0.411403	0.964948	1.37635	0.98502	0.944876	1.32133	1.43137	PF3D7_1436300	550	T	___1	MSVS(0.205)T(0.795)HNK	5	SSQFDNNKKNKMSVSTHNKKSKNLMDSLDLE	PF14_0344;Pf112
PF3D7_1362700		conserved Plasmodium protein, unknown function	No	0.411338	-0.0679474	0.34339	-0.0502796	-0.0856152	0.218161	0.46862	PF3D7_1362700	917	S	___1	EGSNVNS(0.996)CT(0.004)EENTGANNK	7	MNSSNNHFREGSNVNSCTEENTGANNKEKIF	MAL13P1.313;PF13_0332
PF3D7_0831700	HSP70x	heat shock protein 70	Yes	0.410953	-0.606427	-0.195475	-0.44944	-0.763414	-0.350899	-0.0400505	PF3D7_0831700	663	S	___1	GRNS(1)ENKEAQNNGPTVEEVN	4	QEPQKAEATNLRGRNSENKEAQNNGPTVEEV	MAL7P1.228
PF3D7_1149000	Pf332	antigen 332, DBL-like protein	Yes	0.410728	-2.46404	-2.05332	-2.31925	-2.60884	-1.99316	-2.11347	PF3D7_1149000	1460	S	___1	S(0.544)VS(0.456)EEVLEEEGSTTEK	1	VEVASITEEVEEEEKSVSEEVLEEEGSTTEK	PF11_0506;PF11_0507
PF3D7_0319700	ABCI3	ABC transporter I family member 1, putative	No	0.410262	3.1539	3.56417	3.23162	3.07619	3.65045	3.47788	PF3D7_0319700	2441	S	___1	GQS(1)DDDNDEEKNFNK	3	MLYKETEIDKYYKGQSDDDNDEEKNFNKISQ	MAL3P7.4;PFC0875w
PF3D7_1241200		conserved Plasmodium protein, unknown function	No	0.410103	-0.497707	-0.0876045	-0.62612	-0.369295	-0.0949097	-0.0802994	PF3D7_1241200	1400	S	___1	NNS(1)HINNK	3	YSEHVNTDRSYIKNNSHINNKLSICMDNNKK	2277.t00396;MAL12P1.394;PFL1980c
PF3D7_0206300	AROM	pentafunctional AROM polypeptide, putative, pseudogene	No	0.410088	4.36338	4.77347	4.37587	4.35089	4.75766	4.78927	PF3D7_0206300	1953	T	___1	GS(0.001)T(0.999)PDEKYK	3	NLLHCTKKKRPQRGSTPDEKYKGGEIKGNDI	PF02_0059;PF02_0060;PF3D7_0206400;PFB0279w;PFB0280w
PF3D7_1238300	CWC22	pre-mRNA-splicing factor CWC22, putative	No	0.409978	1.10413	1.51411	0.933401	1.27485	1.48537	1.54284	PF3D7_1238300	202	S	___1	RKGS(1)YEGK	4	SVYNMKRNKKDKRKGSYEGKNVYIRRSVSSR	2277.t00371;MAL12P1.369;PFL1855w
PF3D7_1418200		conserved Plasmodium protein, unknown function	No	0.409922	0.629893	1.03981	0.548851	0.710936	1.08741	0.99222	PF3D7_1418200	2	S	___1	S(0.949)ET(0.051)NKQNDNKK	1	______________MSETNKQNDNKKNKITR	PF14_0180
PF3D7_1227700	KIC2	conserved Plasmodium protein, unknown function	No	0.408962	1.6009	2.00986	1.65657	1.54523	1.97669	2.04304	PF3D7_1227700	101	S	___2	ECNDS(1)HKDISLSR	5	CNTNIILPIVKECNDSHKDISLSRNENSIHN	2277.t00268;MAL12P1.268;PFL1340c
PF3D7_1227700	KIC2	conserved Plasmodium protein, unknown function	No	0.408962	1.6009	2.00986	1.65657	1.54523	1.97669	2.04304	PF3D7_1227700	106	S	___2	ECNDS(1)HKDIS(0.984)LS(0.016)R	10	ILPIVKECNDSHKDISLSRNENSIHNISENS	2277.t00268;MAL12P1.268;PFL1340c
PF3D7_1425900		conserved Plasmodium protein, unknown function	Yes	0.408897	-0.0657225	0.343175	0.0185699	-0.150015	0.229071	0.457279	PF3D7_1425900	362	S	___1	LIEGSNS(1)R	7	NDIENVTNKLIEGSNSREAIAT_________	PF14_0239
PF3D7_1207000		conserved Plasmodium protein, unknown function	No	0.408857	-0.211017	0.197841	-0.189878	-0.232155	0.113201	0.28248	PF3D7_1207000	905	S	___1	VEMLS(1)DKEKEIEK	5	MKKRKDNFEKKVEMLSDKEKEIEKIHSQIKE	2277.t00071;MAL12P1.70;PFL0350c
PF3D7_0905800		conserved Plasmodium protein, unknown function	No	0.408837	3.51324	3.92208	3.57761	3.44888	4.03628	3.80788	PF3D7_0905800	828	S	___1	FTYDES(1)PFDNNINVK	6	SKFSTKRTNKFTYDESPFDNNINVKDAKQNI	PFI0285w
PF3D7_0503300	SRSF12	serine/arginine-rich splicing factor 12	No	0.408607	-0.481977	-0.07337	-0.459959	-0.503996	-0.22979	0.0830498	PF3D7_0503300	235	S	___1	SKYNHSNDDYS(1)DETR	11	NENYKSKYNHSNDDYSDETRNSSKHSRKEHV	MAL5P1.33;PFE0160c
PF3D7_0302500	CLAG3.1	cytoadherence linked asexual protein 3.1	Yes	0.408553	-0.00555229	0.403001	-0.13974	0.128635	0.321911	0.484091	PF3D7_0302500;PF3D7_0302200	530;532	S	___1	QIS(0.989)KDS(0.011)NLLNNITK	3	IQCIEKCHSDQARQISKDSNLLNNITKCDLC	MAL3P1.5;PFC0120w
PF3D7_1466800		conserved Plasmodium protein, unknown function	No	0.408513	1.69305	2.10156	1.65546	1.73063	2.11252	2.0906	PF3D7_1466800	625	S	___1	Y(0.001)S(0.397)T(0.602)DS(1)DDIERR	5	LYNSMKNDAYKYSTDSDDIERRLTKGIENEK	PF14_0636
PF3D7_0511500		RNA pseudouridylate synthase, putative	No	0.408413	1.84657	2.25499	1.76624	1.9269	2.34686	2.16311	PF3D7_0511500	9907	S	___1	S(0.007)S(0.007)S(0.985)NIR	3	NTSGNMKNSSNIRSSSNIRSSNNIKSSSNIK	MAL5P1.115;PFE0570w
PF3D7_1473700	NUP116	nucleoporin NUP116/NSP116, putative	No	0.408373	-0.215407	0.192966	-0.19981	-0.231005	0.121141	0.26479	PF3D7_1473700	984	S	___1	GREEDDNKY(0.07)S(0.965)S(0.964)DS(0.001)FIK	11	MKRKRGREEDDNKYSSDSFIKRKKCSKMNPH	PF14_0706
PF3D7_0316700	YOP1	protein YOP1, putative	No	0.407659	3.07042	3.47808	2.99148	3.14936	3.64185	3.31431	PF3D7_0316700	28	S	___1	IS(0.006)S(0.994)NVFGEK	3	EDRPNTSLNSLKRISSNVFGEKLNNLDVSRV	MAL3P6.7;PFC0730w
PF3D7_1013900		translation initiation factor eIF-2B subunit delta, putative	No	0.407413	0.114747	0.52216	0.0363998	0.193094	0.61784	0.426479	PF3D7_1013900	179	S	___2	T(0.027)LNS(0.973)CLLNECPHFS(0.002)DS(0.634)S(0.364)NLEYRDEER	16	TLNSCLLNECPHFSDSSNLEYRDEERKKNDG	PF10_0136
PF3D7_0702300	STARP	sporozoite threonine and asparagine-rich protein	Yes	0.407258	-0.927888	-0.52063	-0.74662	-1.10916	-0.482	-0.559259	PF3D7_0702300	95	S	___1	YNSENTNTNNNIPES(0.048)S(0.948)S(0.004)T(0.001)YTNTR	16	YNSENTNTNNNIPESSSTYTNTRLAANNSTT	PF07_0006
PF3D7_1007700	AP2-I	AP2 domain transcription factor, putative	No	0.406919	-0.065093	0.341825	0.0448399	-0.175026	0.42893	0.254721	PF3D7_1007700	738	S	___1	KLS(1)EES(1)QMLLDDMEQTLCR	6	KRGRGRPPKRKLSEESQMLLDDMEQTLCRNN	PF10_0075
PF3D7_0318200	RPB1	DNA-directed RNA polymerase II subunit RPB1	No	0.406472	-1.32646	-0.919985	-1.19521	-1.4577	-0.932949	-0.907021	PF3D7_0318200	2163	T	___2	LGGKFS(0.281)PT(0.729)QS(0.99)PK	8	INNLDTLKLGGKFSPTQSPKSPTSVMHSPFS	MAL3P6.20;PFC0805w
PF3D7_0202000	KAHRP	knob-associated histidine-rich protein	Yes	0.406463	-1.32614	-0.919675	-1.24263	-1.40965	-0.90802	-0.93133	PF3D7_0202000	590	T	___3	EAS(0.773)T(0.231)T(0.996)EGATK	5	KEASTSKGATKEASTTEGATKGASTTAGSTT	PF02_0020;PFB0100c
PF3D7_0504000	ATPase3	cation transporting P-ATPase	No	0.406447	4.11134	4.51779	4.12575	4.09694	4.55083	4.48475	PF3D7_0504000	1016	S	___1	SISNSVNNIYPNKLLS(1)DDDLK	16	SISNSVNNIYPNKLLSDDDLKQIKNQTSLLN	MAL5P1.40;PFE0195w
PF3D7_0601900		conserved Plasmodium protein, unknown function	Yes	0.406432	1.16053	1.56696	1.14063	1.18043	1.32677	1.80715	PF3D7_0601900	119	S	___2	S(0.004)HS(0.04)S(0.04)S(0.394)S(0.547)S(0.975)VY(0.001)ASANAEN	7	SSSSRQAARSHSSSSSVYASANAEN______	2270.t00296;MAL6P1.22;PFF0090w
PF3D7_0904900	CuTP	copper-transporting ATPase	Yes	0.406378	-2.70577	-2.29939	-2.71474	-2.6968	-2.29129	-2.30749	PF3D7_0904900	361	S	___1	NY(0.001)NNS(0.007)NDNY(0.022)NS(0.843)NNNY(0.126)Y(0.001)YDYNEEK	11	NVENKNYNNSNDNYNSNNNYYYDYNEEKLKK	PFI0240c
PF3D7_1303500	NHE	sodium/hydrogen exchanger, Na+, H+ antiporter	No	0.406102	-0.989647	-0.583545	-1.11329	-0.866005	-0.77339	-0.3937	PF3D7_1303500	996	S	___2	IS(1)IDNSYKGEMR	2	IHNRYRSLNVISRKISIDNSYKGEMRINVIR	PF13_0019
PF3D7_0925400		protein phosphatase-beta	No	0.405792	-0.974147	-0.568355	-0.832788	-1.11551	-0.519669	-0.617041	PF3D7_0925400	100	S	___1	ELS(1)DEEVSSENEYNK	3	EDNYNIYDNLSVKELSDEEVSSENEYNKKIK	PFI1245c
PF3D7_1473200		DnaJ protein, putative	No	0.405428	-1.92609	-1.52066	-1.95905	-1.89314	-1.45074	-1.59059	PF3D7_1473200	91	S	___1	MENQNTGNDVNS(1)GNS(1)ENAEK	12	NTAKMENQNTGNDVNSGNSENAEKSEQSEKV	PF14_0700
PF3D7_1442400	KIC9	conserved Plasmodium protein, unknown function	No	0.405107	-1.53345	-1.12834	-1.39962	-1.66727	-1.0187	-1.23798	PF3D7_1442400	853	S	___1	NFDDY(0.023)S(0.531)KCS(0.446)PNKQNK	6	NLNTLITNVKNFDDYSKCSPNKQNKNNKILT	PF14_0402
PF3D7_1129400	NOP2	rRNA (cytosine-C(5))-methyltransferase, putative	No	0.405033	4.64718	5.05222	4.74835	4.54601	5.01412	5.09031	PF3D7_1129400	2	S	___1	S(1)NAEALNDNKNDEDEYKEK	1	______________MSNAEALNDNKNDEDEY	PF11_0305
PF3D7_1322100	SET2	histone-lysine N-methyltransferase SET2	No	0.404878	-3.94748	-3.5426	-4.08594	-3.80902	-3.5294	-3.5558	PF3D7_1322100	1738	S	___1	HNEQDS(1)INNAK	6	NEQGSINNAKHNEQDSINNAKQNEQDSINNA	MAL13P1.122
PF3D7_1326300		RNA-binding protein, putative	No	0.404768	-3.22774	-2.82297	-3.05649	-3.399	-2.77313	-2.87282	PF3D7_1326300	147	S	___1	S(1)GRDDKYDR	1	DRDRDRERRSIREERSGRDDKYDRRKKRRHS	PF13_0147
PF3D7_1341200		60S ribosomal protein L18, putative	No	0.404572	-0.376897	0.0276756	-0.357079	-0.396715	-0.00698853	0.0623398	PF3D7_1341200	129	S	___1	AS(0.003)S(0.997)INIIR	3	QLYSEMAGRHRARASSINIIRISEISSSLVR	PF13_0224
PF3D7_1016700		Plasmodium exported protein (PHISTc), unknown function	Yes	0.404037	0.135978	0.540015	0.1196	0.152355	0.54435	0.535681	PF3D7_1016700	181	S	___1	CLDY(0.001)DLS(0.999)LLEK	7	GNTSQSNTKCLDYDLSLLEKSFQGMSFNTHS	PF10_0162
PF3D7_0202000	KAHRP	knob-associated histidine-rich protein	Yes	0.403937	1.70106	2.10499	1.67239	1.72972	2.06584	2.14415	PF3D7_0202000	605	T	___2	GASTTAGS(0.01)T(0.099)T(0.888)GAT(0.003)TGANAVQSK	10	TEGATKGASTTAGSTTGATTGANAVQSKDET	PF02_0020;PFB0100c
PF3D7_1312900	EIF4G	eukaryotic translation initation factor 4 gamma	No	0.403492	-0.633862	-0.23037	-0.547829	-0.719894	-0.22707	-0.233669	PF3D7_1312900	306	S	___1	NS(1)NVEEHLR	2	FDENMNNSNTMHSRNSNVEEHLRNNSIDMNN	MAL13P1.63
PF3D7_0923400		conserved Plasmodium protein, unknown function	No	0.402857	2.96632	3.36918	3.00125	2.93139	3.35787	3.38049	PF3D7_0923400	107	S	___1	EYS(1)QDK	3	YDNNTYWEKKKYKEYSQDKKYNKEYYNKDSS	PFI1150w
PF3D7_1466400	ApiAP2	AP2 domain transcription factor AP2-SP	No	0.402748	1.06225	1.465	1.03783	1.08668	1.52027	1.40973	PF3D7_1466400	554	T	___1	T(0.153)T(0.847)SNINNRK	2	HSLKGQMELSKRKKTTSNINNRKNDLLEDSV	PF14_0633
PF3D7_1445400	CLK1	protein serine/threonine kinase-1	No	0.402564	-0.263653	0.138911	-0.24996	-0.277346	0.269361	0.008461	PF3D7_1445400	254	S	___1	NKS(0.262)IS(0.738)R	5	HNIYRYHNGNKNKSISRWEDNYTYKDIYQPS	PF14_0431
PF3D7_1223400		phospholipid-transporting ATPase, putative	No	0.402247	0.711848	1.1141	0.617811	0.805885	1.33491	0.89328	PF3D7_1223400	1034	S	___1	NKKENNS(1)DNVK	7	NRKKKDVQKNKKENNSDNVKSSTQNKKKKHF	2277.t00225;MAL12P1.225;PFL1125w
PF3D7_1330800		RNA-binding protein, putative	No	0.402182	1.63889	2.04107	1.73887	1.53892	1.99498	2.08717	PF3D7_1330800	26	S	___2	ADDS(1)NVDNK	4	SKDKKEELKDIKADDSNVDNKATESTAVDSE	PF13_0165
PF3D7_1126800	SR-MG	RNA-binding protein, putative	No	0.402032	-0.168957	0.233075	-0.120699	-0.217215	0.18251	0.28364	PF3D7_1126800	750	S	___1	DMLSHNS(1)FEKNNLIQK	7	YDSPYYSPRDMLSHNSFEKNNLIQKKNEDNI	PF11_0279
PF3D7_1307800		fork head domain protein, putative	No	0.401447	-0.649407	-0.24796	-0.586649	-0.712166	-0.26371	-0.23221	PF3D7_1307800	257	S	___2	T(0.45)S(0.499)KDNS(0.091)Y(0.201)Y(0.227)DS(0.532)K	10	SSEHTRTSKDNSYYDSKRKYRNITSEDEEMK	PF13_0042
PF3D7_0730900	PTP4	EMP1-trafficking protein	Yes	0.401038	2.23983	2.64087	2.37058	2.10909	2.58623	2.69551	PF3D7_0730900	1091	S	___1	SMS(1)VANTK	3	NINSENKQNAHTRSMSVANTKSHVQQNVKTF	MAL7P1.171
PF3D7_1359400	CELF1	CUGBP Elav-like family member 1	No	0.400982	-2.89446	-2.49348	-3.17782	-2.6111	-2.36645	-2.62051	PF3D7_1359400	135	S	___1	MAS(1)ISEADNAIR	3	KITNVHKSSAFVKMASISEADNAIRLLNNQK	PF13_0315
PF3D7_1107800	ApiAP2	AP2 domain transcription factor, putative	No	0.400948	-0.211647	0.189301	-0.228729	-0.194565	0.118261	0.26034	PF3D7_1107800	286	S	___2	KDAT(0.003)S(0.019)GS(0.978)LLYKDDIIGS(0.999)DAY(0.001)NK	7	YDENNVIKKKDATSGSLLYKDDIIGSDAYNK	PF11_0091
PF3D7_1107800	ApiAP2	AP2 domain transcription factor, putative	No	0.400948	-0.211647	0.189301	-0.228729	-0.194565	0.118261	0.26034	PF3D7_1107800	296	S	___2	KDATSGSLLYKDDIIGS(1)DAYNK	17	DATSGSLLYKDDIIGSDAYNKKHEKTLDFNE	PF11_0091
PF3D7_1142100		conserved Plasmodium protein, unknown function	No	0.400798	1.82629	2.22709	1.95751	1.69506	2.24715	2.20702	PF3D7_1142100	2168	S	___1	FIPS(0.998)DS(0.002)QTKEDYNYDKYR	4	TNDYTNDNINNRFIPSDSQTKEDYNYDKYRK	PF11_0433
PF3D7_0500800	MESA	mature parasite-infected erythrocyte surface antigen	Yes	0.400558	1.51225	1.91281	1.6215	1.40299	1.92321	1.9024	PF3D7_0500800	454	T	___1	NIET(1)DDEEET(1)LVVKDDAK	10	NFLCNKNIETDDEEETLVVKDDAKKKHKFLR	MAL5P1.9;PFE0040c
PF3D7_0922100		ubiquitin-like protein, putative	No	0.400307	-1.76024	-1.35993	-1.83093	-1.68954	-1.45908	-1.26078	PF3D7_0922100	1214	S	___2	SAS(0.001)HS(0.077)FS(0.922)DAT(0.023)S(0.853)S(0.125)HQEKQEK	11	SYKSKSASHSFSDATSSHQEKQEKKNNLHNE	PFI1085w
PF3D7_0501400	FIRA	interspersed repeat antigen	Yes	0.400272	1.98346	2.38373	2.02751	1.93941	2.25371	2.51375	PF3D7_0501400	420	S	___2	KGS(1)EGDNIS(1)LS(0.944)S(0.055)LS(0.001)EETQEK	9	EEHIDEKKGSEGDNISLSSLSEETQEKSHTK	MAL5P1.15;PFE0070w
PF3D7_0730900	PTP4	EMP1-trafficking protein	Yes	0.400137	-3.60199	-3.20185	-3.51785	-3.68612	-3.17152	-3.23218	PF3D7_0730900	1144	S	___1	RAS(0.5)VS(0.5)EINENVEETK	5	PKIDRTKINTRRASVSEINENVEETKKDIPQ	MAL7P1.171
PF3D7_1314700		pinin/SDK/MemA domain-containing protein, putative	No	0.400084	-0.272238	0.127846	-0.3162	-0.228275	0.10745	0.148241	PF3D7_1314700	497	S	___1	SYEGEENT(0.001)GKS(0.999)NEGEENTGK	11	ENTGKSYEGEENTGKSNEGEENTGKSYEDEE	MAL13P1.75
PF3D7_1411200	ROM8	rhomboid protease ROM8	No	0.399978	-3.41165	-3.01167	-3.36261	-3.46068	-3.14628	-2.87706	PF3D7_1411200	212	S	___2	DDLNDDNENS(0.086)CS(0.638)S(0.638)FT(0.638)RR	12	KKTRDDLNDDNENSCSSFTRRGKYNKTKTIK	PF14_0110
PF3D7_1411200	ROM8	rhomboid protease ROM8	No	0.399978	-3.41165	-3.01167	-3.36261	-3.46068	-3.14628	-2.87706	PF3D7_1411200	213	S	___2	DDLNDDNENS(0.086)CS(0.638)S(0.638)FT(0.638)RR	13	KTRDDLNDDNENSCSSFTRRGKYNKTKTIKK	PF14_0110
PF3D7_1411200	ROM8	rhomboid protease ROM8	No	0.399978	-3.41165	-3.01167	-3.36261	-3.46068	-3.14628	-2.87706	PF3D7_1411200	215	T	___2	DDLNDDNENS(0.086)CS(0.638)S(0.638)FT(0.638)RR	15	RDDLNDDNENSCSSFTRRGKYNKTKTIKKSN	PF14_0110
PF3D7_1022400	SRSF4	serine/arginine-rich splicing factor 4	No	0.399786	-1.37131	-0.97152	-1.44881	-1.2938	-1.01659	-0.926451	PF3D7_1022400	479	S	___1	TEENHDS(1)KS(1)VS(1)NDR	9	GSKKGAKTEENHDSKSVSNDRNKSDKSEEKE	PF10_0217
PF3D7_1132400		conserved Plasmodium membrane protein, unknown function	No	0.399117	1.5117	1.91082	1.56119	1.46222	1.91028	1.91136	PF3D7_1132400	791	S	___1	KS(0.566)S(0.434)MDNIKDDITGK	2	YHVDDDNIYYKEIRKSSMDNIKDDITGKYNM	PF11_0333
PF3D7_0731300	PfG174	Plasmodium exported protein (PHISTb), unknown function	Yes	0.398942	2.47542	2.87436	2.55004	2.40079	2.795	2.95372	PF3D7_0731300	86	T	___2	NVKDGNDS(0.115)S(0.846)S(0.04)EELDNT(0.884)NVPT(0.101)S(0.015)KPK	16	NVKDGNDSSSEELDNTNVPTSKPKKKLSAVF	MAL7P1.174
PF3D7_0501400	FIRA	interspersed repeat antigen	Yes	0.398853	1.61478	2.01364	1.73575	1.49381	1.8508	2.17647	PF3D7_0501400	414	S	___3	KGS(1)EGDNIS(1)LS(0.944)S(0.055)LS(0.001)EETQEK	3	QEPVTVEEHIDEKKGSEGDNISLSSLSEETQ	MAL5P1.15;PFE0070w
PF3D7_0812500		RNA-binding protein, putative	No	0.398831	0.263028	0.66186	0.304581	0.221476	0.65745	0.666269	PF3D7_0812500	745	S	___1	DFKS(1)YREEK	4	NTYNNNDNYNNKDFKSYREEKNTNYHRTDDN	PF08_0086
PF3D7_0905800		conserved Plasmodium protein, unknown function	No	0.398772	4.43694	4.83571	4.44044	4.43344	4.80027	4.87115	PF3D7_0905800	775	S	___1	YGNVS(1)PHINDPLINK	5	NLHTKQFQNEKYGNVSPHINDPLINKNNYER	PFI0285w
PF3D7_0806100		conserved Plasmodium protein, unknown function	No	0.398503	-3.16507	-2.76656	-2.85028	-3.47986	-2.81411	-2.71902	PF3D7_0806100	470	S	___1	KDES(0.95)Y(0.004)IDS(0.029)Y(0.018)IDLIK	4	KAKKKKKKKKEKKDESYIDSYIDLIKNVKVF	PF08_0116
PF3D7_0521000		conserved Plasmodium protein, unknown function	No	0.398447	1.19757	1.59602	1.2311	1.16405	1.5557	1.63634	PF3D7_0521000	81	S	___1	T(0.213)S(0.894)T(0.894)ES(1)EDDDVTK	5	NEKGFYLKKRKTSTESEDDDVTKNIQKKRKE	MAL5P1.211;PFE1055c
PF3D7_0501400	FIRA	interspersed repeat antigen	Yes	0.398314	1.55695	1.95526	1.67952	1.43438	1.7869	2.12362	PF3D7_0501400	422	S	___3	KGS(1)EGDNIS(1)LS(0.944)S(0.055)LS(0.001)EETQEK	11	HIDEKKGSEGDNISLSSLSEETQEKSHTKKK	MAL5P1.15;PFE0070w
PF3D7_0401800	PfD80	Plasmodium exported protein (PHISTb), unknown function	Yes	0.398108	1.47351	1.87162	1.45991	1.48711	1.76869	1.97455	PF3D7_0401800	138	S	___3	SAS(0.001)AAS(0.98)T(0.019)TR	6	STASAASTTRSASAASTTRSASAASTTRSAS	MAL4P1.16;PFD0080c
PF3D7_0932800	CSE1	importin alpha re-exporter, putative	No	0.397898	0.271507	0.669405	0.0212402	0.521774	1.13167	0.20714	PF3D7_0932800	736	S	___1	DALLTLS(0.001)S(0.999)DGMDITNK	8	LECKILTKDALLTLSSDGMDITNKSSGSILN	PFI1590c
PF3D7_1219000	FRM2	formin 2	No	0.396882	2.67474	3.07162	2.81427	2.53522	2.98612	3.15713	PF3D7_1219000	1606	S	___1	HYCDHS(1)DIEKNK	6	TNVYESIVEKHYCDHSDIEKNKGQKIDIQYS	2277.t00185;MAL12P1.186;PFL0925w
PF3D7_1407800	PM4	plasmepsin IV	Yes	0.396703	0.239548	0.63625	0.387041	0.0920544	0.671551	0.60095	PF3D7_1407800	4	T	___1	ALT(1)VKEEEFSNTLIK	3	____________MALTVKEEEFSNTLIKNAS	PF14_0075
PF3D7_0904600		ubiquitin specific protease, putative	No	0.396568	0.274278	0.670846	0.36063	0.187925	0.651981	0.689711	PF3D7_0904600	1270	S	___1	SNNHENKNDVEDNMEMDET(0.003)NNNS(0.997)MDPQQR	23	NDVEDNMEMDETNNNSMDPQQRCNLISVFNK	PFI0225w
PF3D7_0922100		ubiquitin-like protein, putative	No	0.396478	-2.95229	-2.55581	-3.29799	-2.60659	-2.68637	-2.42525	PF3D7_0922100	511	S	___2	KY(0.009)Y(0.066)DS(0.826)NS(0.316)S(0.339)IS(0.442)PNEDAY(0.002)VER	5	KIKITNKHKKKKYYDSNSSISPNEDAYVERI	PFI1085w
PF3D7_0202000	KAHRP	knob-associated histidine-rich protein	Yes	0.395907	5.04806	5.44397	5.01606	5.08006	5.39493	5.49301	PF3D7_0202000	406	S	___1	HKDNEDAES(1)VKS(1)K	12	KSKKHKDNEDAESVKSKKHKSHDCEKKKSKK	PF02_0020;PFB0100c
PF3D7_1205500		zinc finger protein, putative	No	0.395798	0.152523	0.548321	0.168791	0.136255	0.553881	0.542761	PF3D7_1205500	1670	T	___1	KT(0.01)NVS(0.126)PT(0.864)NNIIECNSDLK	7	INNLNINNKKTNVSPTNNIIECNSDLKLENN	2277.t00056;MAL12P1.55;PFL0275w
PF3D7_1202600	NEMF	conserved protein, unknown function	No	0.395738	-1.85374	-1.458	-1.75969	-1.9478	-1.36532	-1.55069	PF3D7_1202600	1889	S	___1	EGLNKS(0.998)GDDNS(0.002)YVEDIYGNNK	6	NYDNHNVNDKEGLNKSGDDNSYVEDIYGNNK	2277.t00026;MAL12P1.26;PFL0130c
PF3D7_1022400	SRSF4	serine/arginine-rich splicing factor 4	No	0.395488	-1.93697	-1.54148	-2.05859	-1.81536	-1.55984	-1.52313	PF3D7_1022400	481	S	___1	TEENHDS(1)KS(1)VS(1)NDR	11	KKGAKTEENHDSKSVSNDRNKSDKSEEKEKP	PF10_0217
PF3D7_1246600	BUD13	pre-mRNA-splicing factor CWC26, putative	No	0.395482	-2.00237	-1.60688	-2.12371	-1.88103	-1.55312	-1.66065	PF3D7_1246600	127	S	___2	RES(1)DS(1)DMS(1)ICR	3	SYDKKKKKKKSKKRESDSDMSICRNKHNDKS	2277.t00447;MAL12P1.446;PFL2235w
PF3D7_1246600	BUD13	pre-mRNA-splicing factor CWC26, putative	No	0.395482	-2.00237	-1.60688	-2.12371	-1.88103	-1.55312	-1.66065	PF3D7_1246600	129	S	___2	RES(1)DS(1)DMS(1)ICR	5	DKKKKKKKSKKRESDSDMSICRNKHNDKSDS	2277.t00447;MAL12P1.446;PFL2235w
PF3D7_0202000	KAHRP	knob-associated histidine-rich protein	Yes	0.395468	4.0243	4.41977	3.9991	4.0495	4.38183	4.4577	PF3D7_0202000	598	S	___2	GAS(0.991)T(0.009)TAGSTTGATTGANAVQSK	3	ATKEASTTEGATKGASTTAGSTTGATTGANA	PF02_0020;PFB0100c
PF3D7_1326700		conserved Apicomplexan protein, unknown function	No	0.394504	1.83258	2.22709	1.69557	1.96959	2.19694	2.25723	PF3D7_1326700	170	S	___3	T(0.005)DS(0.996)VVKS(0.999)DIS(1)LKNDLNR	7	IKEIDNHQKTDSVVKSDISLKNDLNRKSNTS	MAL13P1.360
PF3D7_1326700		conserved Apicomplexan protein, unknown function	No	0.394504	1.83258	2.22709	1.69557	1.96959	2.19694	2.25723	PF3D7_1326700	173	S	___3	SDIS(1)LKNDLNR	4	IDNHQKTDSVVKSDISLKNDLNRKSNTSQKS	MAL13P1.360
PF3D7_1326700		conserved Apicomplexan protein, unknown function	No	0.394504	1.83258	2.22709	1.69557	1.96959	2.19694	2.25723	PF3D7_1326700	166	S	___3	T(0.005)DS(0.996)VVKS(0.999)DIS(1)LKNDLNR	3	NEKNIKEIDNHQKTDSVVKSDISLKNDLNRK	MAL13P1.360
PF3D7_0936800		Plasmodium exported protein (PHISTc), unknown function	Yes	0.394319	1.43031	1.82463	1.47637	1.38424	1.73672	1.91253	PF3D7_0936800	275	S	___1	GYLGEVES(1)ETIKKK	8	HSRGIFAKGYLGEVESETIKKKTEHHENVNE	PFI1780w
PF3D7_1004400		RNA-binding protein, putative	No	0.394168	-1.16178	-0.767614	-1.23535	-1.08821	-0.812799	-0.722429	PF3D7_1004400	614	S	___3	VS(1)HRDGHMK	2	SMSMIDRDNTYDERVSHRDGHMKDDRDDDMC	PF10_0047
PF3D7_1004400		RNA-binding protein, putative	No	0.394168	-1.16178	-0.767614	-1.23535	-1.08821	-0.812799	-0.722429	PF3D7_1004400	599	S	___3	S(1)MS(0.999)MIDRDNT(0.001)Y(0.001)DER	1	NKSEVDDSKYKKSTRSMSMIDRDNTYDERVS	PF10_0047
PF3D7_1004400		RNA-binding protein, putative	No	0.394168	-1.16178	-0.767614	-1.23535	-1.08821	-0.812799	-0.722429	PF3D7_1004400	601	S	___3	S(1)MS(0.999)MIDRDNT(0.001)Y(0.001)DER	3	SEVDDSKYKKSTRSMSMIDRDNTYDERVSHR	PF10_0047
PF3D7_1004400		RNA-binding protein, putative	No	0.394168	-1.16178	-0.767614	-1.23535	-1.08821	-0.812799	-0.722429	PF3D7_1004400	608	T	___3	DNT(1)YDER	3	YKKSTRSMSMIDRDNTYDERVSHRDGHMKDD	PF10_0047
PF3D7_0305500		conserved Plasmodium protein, unknown function	No	0.393942	-2.01698	-1.62304	-2.19135	-1.84262	-1.59836	-1.64772	PF3D7_0305500	2184	S	___1	YNDVS(0.865)S(0.135)CGAR	5	HISQHTNNNIRYNDVSSCGARGHNINSNENV	MAL3P2.18;PFC0245c
PF3D7_0806800		V-type proton ATPase subunit a, putative	No	0.393137	1.69922	2.09236	1.70885	1.68959	2.0905	2.09422	PF3D7_0806800	274	S	___1	QHDTFS(1)DKLDGK	6	DTNNMYKNNKQHDTFSDKLDGKDKNDKKKKK	PF08_0113
PF3D7_1359900		conserved Plasmodium membrane protein, unknown function	No	0.392673	0.743573	1.13625	0.812981	0.674166	1.10518	1.16731	PF3D7_1359900	1472	S	___1	NLNES(1)YGNFNTPTISPTNIK	5	RIIGTIGNKMRNLNESYGNFNTPTISPTNIK	MAL13P1.298
PF3D7_0918900	gammaGCS	gamma-glutamylcysteine synthetase	No	0.392468	0.877607	1.27008	0.969931	0.785284	1.31718	1.22297	PF3D7_0918900	312	S	___2	DNT(1)PRS(0.998)CNDY(0.002)NNVNDSSNTQDIFISSLKK	6	DEIENKNKEKDNTPRSCNDYNNVNDSSNTQD	PFI0925w
PF3D7_1149100.2-p1		Plasmodium exported protein, unknown function		0.392347	0.393038	0.785385	0.46134	0.324736	0.74202	0.828751	PF3D7_1149100.2-p1;PF3D7_1149100	416;417	S	___1	NS(0.533)T(0.478)NDS(0.903)IKT(0.086)PKK	6	EESLNKLSTKNSTNDSIKTPKKKSNNKNTKE
PF3D7_0730800.2-p1		Plasmodium exported protein, unknown function, unspecified product		0.392062	2.98082	3.37289	3.04024	2.92141	3.41451	3.33126	PF3D7_0730800.2-p1;PF3D7_0730800	124;124	S	___1	YVNEDGTTKPNAPTAQS(1)LTSIVK	17	VNEDGTTKPNAPTAQSLTSIVKGVMHDIKPQ
PF3D7_1467900		rab GTPase activator, putative	No	0.391052	0.118733	0.509786	0.088541	0.148926	0.549261	0.47031	PF3D7_1467900	1171	S	___1	ES(0.122)S(0.878)GGEDVKNDMNEK	3	EDNKENIVDNIMKESSGGEDVKNDMNEKNIT	PF14_0647
PF3D7_1148700	GEXP12	Plasmodium exported protein (PHISTc), unknown function	Yes	0.390483	-1.53477	-1.14429	-1.53329	-1.53625	-1.18226	-1.10632	PF3D7_1148700	254	S	___1	T(0.015)ECNPKES(0.97)IKNES(0.015)IPK	8	NYKKINNKTECNPKESIKNESIPKECIPNEN	PF11_0503
PF3D7_0624600	ISWI	SNF2 helicase, putative	No	0.389897	-1.3062	-0.916305	-1.51101	-1.10139	-0.794559	-1.03805	PF3D7_0624600	2101	S	___1	LTHFLS(0.004)NQPLT(0.788)IS(0.625)S(0.483)DY(0.036)S(0.063)DT(0.002)KDIIEIR	13	KAKLTHFLSNQPLTISSDYSDTKDIIEIRSD	2270.t00132;MAL6P1.183;PFF1185w
PF3D7_0404300		conserved Plasmodium protein, unknown function	No	0.389883	-2.34611	-1.95623	-2.15147	-2.54075	-1.81034	-2.10212	PF3D7_0404300	130	T	___1	VT(1)S(1)DENVR	2	KEKKRKKELKKNKKVTSDENVRNAEDEEEEE	MAL4P1.41b;PFD0207c
PF3D7_1121100		conserved Plasmodium protein, unknown function	No	0.389862	-2.44315	-2.05329	-2.50371	-2.3826	-2.26428	-1.8423	PF3D7_1121100	256	S	___1	TFNDNIS(1)NENNNFGYSK	7	PNKNNNLDKTFNDNISNENNNFGYSKNEESK	PF11_0218
PF3D7_1343300		conserved Plasmodium protein, unknown function	No	0.389852	-0.742307	-0.352455	-0.635439	-0.849174	-0.25771	-0.447201	PF3D7_1343300	432	S	___2	VNS(0.375)S(0.418)S(0.445)EKS(0.761)DPCDLDSIDYEVNPVLK	8	NNIMKKRKVNSSSEKSDPCDLDSIDYEVNPV	PF13_0237
PF3D7_1140700		conserved Plasmodium protein, unknown function	No	0.389332	0.604083	0.993415	0.622311	0.585855	0.77364	1.21319	PF3D7_1140700	969	S	___1	S(0.857)LS(0.143)DFIDEDK	1	NNNSNSNIRNMIHNKSLSDFIDEDKIFKQKS	PF11_0418
PF3D7_1139300	ApiAP2	AP2 domain transcription factor, putative	No	0.389052	-0.333492	0.0555601	-0.29092	-0.376064	-0.0919189	0.203039	PF3D7_1139300	2448	S	___1	LSIES(1)IEQIK	5	VIRRGVKEAYKLSIESIEQIKRQTQTNNFNN	PF11_0404
PF3D7_1328500		alpha/beta-hydrolase, putative	No	0.388978	3.00676	3.39574	3.07637	2.93715	3.4043	3.38718	PF3D7_1328500	243	S	___1	GKS(1)IEVK	3	EDINNDIEKTHERGKSIEVKSEVNIPKYTST	PF13_0153
PF3D7_1344100		krox-like protein, putative	No	0.388828	0.0741119	0.46294	0.21958	-0.0713558	0.45569	0.47019	PF3D7_1344100	225	S	___2	RNS(1)FDLVY(0.215)S(0.078)DS(0.701)NVNT(0.007)INK	11	SLDKKRNSFDLVYSDSNVNTINKNNKKERNY	MAL13P1.395
PF3D7_0401800	PfD80	Plasmodium exported protein (PHISTb), unknown function	Yes	0.388522	-1.81766	-1.42914	-1.93187	-1.70345	-1.42342	-1.43485	PF3D7_0401800	316	S	___2	EAES(1)VDDNNKEGNES(0.98)DNIY(0.004)CMLCS(0.006)S(0.006)NT(0.005)R	4	GSNVDITEEEEKEAESVDDNNKEGNESDNIY	MAL4P1.16;PFD0080c
PF3D7_0401800	PfD80	Plasmodium exported protein (PHISTb), unknown function	Yes	0.388522	-1.81766	-1.42914	-1.93187	-1.70345	-1.42342	-1.43485	PF3D7_0401800	327	S	___2	EAESVDDNNKEGNES(0.999)DNIY(0.001)CMLCSSNTR	15	KEAESVDDNNKEGNESDNIYCMLCSSNTRGF	MAL4P1.16;PFD0080c
PF3D7_0922100		ubiquitin-like protein, putative	No	0.388278	0.201397	0.589675	0.29719	0.105604	0.58555	0.5938	PF3D7_0922100	1197	T	___1	KSSNENNLFKDT(0.609)NS(0.389)Y(0.002)K	12	HHKKKSSNENNLFKDTNSYKSKSASHSFSDA	PFI1085w
PF3D7_1126800	SR-MG	RNA-binding protein, putative	No	0.387972	-0.698042	-0.31007	-0.556709	-0.839375	-0.25079	-0.36935	PF3D7_1126800	88	S	___1	RKS(1)PDTMK	3	DGNEIRIIIAQNRRKSPDTMKFYHNEYLYNY	PF11_0279
PF3D7_0401800	PfD80	Plasmodium exported protein (PHISTb), unknown function	Yes	0.387907	1.81363	2.20154	1.85585	1.77142	2.08239	2.32069	PF3D7_0401800	174	S	___3	SAST(0.002)AS(0.998)T(0.999)AS(0.999)AAS(0.001)AASTTR	6	RSASTASTARSASTASTASAASAASTTRSAS	MAL4P1.16;PFD0080c
PF3D7_1149600		DnaJ protein, putative	Yes	0.387672	3.59616	3.98384	3.61349	3.57883	3.94267	4.025	PF3D7_1149600	180	S	___1	NDS(0.999)NT(0.001)NIQEK	3	SNVSSTITKSLERNDSNTNIQEKVPKESKNT	PF11_0513
PF3D7_1222300	GRP94	endoplasmin, putative	No	0.387517	-0.0328522	0.354665	0.0757809	-0.141485	0.34454	0.36479	PF3D7_1222300	544	S	___1	S(0.415)IS(0.583)LDT(0.002)YIEHMKPDQK	3	AKLLLFKTMQYPKSISLDTYIEHMKPDQKFI	2277.t00214;MAL12P1.214;PFL1070c
PF3D7_1004300		E3 ubiquitin-protein ligase, putative	No	0.387463	3.42867	3.81614	3.48522	3.37213	3.88193	3.75034	PF3D7_1004300	984	S	___1	SRDS(1)DNEKEGSR	4	SNASNSNNSTRRSRDSDNEKEGSRKKSKNYK	PF10_0046
PF3D7_1022000		RNA-binding protein, putative	No	0.387418	1.18843	1.57585	1.0642	1.31266	1.61089	1.54081	PF3D7_1022000	893	S	___1	SNYS(0.994)DS(0.005)K	4	CDNNNNNNNNSKSNYSDSKKVTPNSNSNSNS	PF10_0214
PF3D7_1126500		conserved Plasmodium protein, unknown function	No	0.387202	-1.79495	-1.40775	-1.86933	-1.72058	-1.10409	-1.71141	PF3D7_1126500	9	S	___1	LYVS(1)KECMPLK	4	_______MEGSKLYVSKECMPLKILRDTKAN	PF11_0275
PF3D7_0817300		conserved Plasmodium protein, unknown function	No	0.386903	1.28796	1.67486	1.39579	1.18012	1.64253	1.70719	PF3D7_0817300	127	S	___2	SQDENFLHAEVS(1)S(1)NEYK	12	CEFKSQDENFLHAEVSSNEYKDANNDSSDEE	PF08_0060
PF3D7_0817300		conserved Plasmodium protein, unknown function	No	0.386903	1.28796	1.67486	1.39579	1.18012	1.64253	1.70719	PF3D7_0817300	128	S	___2	SQDENFLHAEVS(1)S(1)NEYK	13	EFKSQDENFLHAEVSSNEYKDANNDSSDEED	PF08_0060
PF3D7_1227200	K1	potassium channel	Yes	0.386817	1.10274	1.48956	1.09912	1.10636	1.61298	1.36613	PF3D7_1227200	295	S	___1	NDTGGNS(1)FKR	7	EKRIVVFPRNDTGGNSFKRESIYIDDCNMWM	2277.t00263;MAL12P1.263;PFL1315w
PF3D7_0215400		conserved Plasmodium protein, unknown function	No	0.386748	-1.18693	-0.800179	-1.06139	-1.31247	-0.88019	-0.720169	PF3D7_0215400	283	S	___1	RVS(1)DASDIYAR	3	VDINQTKDYKEKKRVSDASDIYARTDSVNSN	PF02_0145;PFB0700c
PF3D7_1466900		rhoptry protein, putative	No	0.386707	0.521313	0.90802	0.47562	0.567005	0.930941	0.885099	PF3D7_1466900	1216	S	___1	NNS(1)NNLNSK	3	NNNNNNNISSSSRNNSNNLNSKNEILGSQNS	PF14_0637
PF3D7_1004400		RNA-binding protein, putative	No	0.386493	-2.3349	-1.9484	-2.34253	-2.32726	-1.89745	-1.99936	PF3D7_1004400	614	S	___2	VS(1)HRDGHMK	2	SMSMIDRDNTYDERVSHRDGHMKDDRDDDMC	PF10_0047
PF3D7_0113200		Plasmodium exported protein, unknown function	Yes	0.386247	1.97896	2.3652	1.97656	1.98136	2.33309	2.39732	PF3D7_0113200	365	S	___1	SENENDDES(1)DYDDDEELQGHSVVYNDK	9	RTNNQHRSENENDDESDYDDDEELQGHSVVY	MAL1P3.08;PFA0630c
PF3D7_1108600	ERC	endoplasmic reticulum-resident calcium binding protein	No	0.385643	0.951367	1.33701	1.07225	0.830484	1.24115	1.43287	PF3D7_1108600	322	T	___1	AFEDDDMDADNT(1)EDDKDEADDASQQK	12	ARSRAFEDDDMDADNTEDDKDEADDASQQKS	PF11_0098
PF3D7_1134600		zinc finger protein, putative	No	0.385608	-0.747822	-0.362214	-0.691299	-0.804344	-0.341429	-0.382999	PF3D7_1134600	922	S	___1	GEEGEIS(0.546)S(0.454)PKER	7	YNILINNVRGEEGEISSPKERNIPKKDIEII	PF11_0357
PF3D7_0603600		conserved Plasmodium protein, unknown function	No	0.385113	1.15225	1.53736	1.17687	1.12762	1.49776	1.57696	PF3D7_0603600	785	S	___1	KIHILS(1)EDDNKR	6	SNNMISNKMKKIHILSEDDNKRNINVDKRKG	2270.t00333;MAL6P1.39;PFF0175c
PF3D7_0729100		conserved Plasmodium protein, unknown function	No	0.384898	1.32574	1.71064	1.27744	1.37404	1.65783	1.76345	PF3D7_0729100	1626	S	___1	NGPMDGVS(1)FDDDKYK	8	EWKFNDIRNGPMDGVSFDDDKYKNRKYYHKE	PF07_0120
PF3D7_0923400		conserved Plasmodium protein, unknown function	No	0.384843	1.90547	2.29031	2.02297	1.78797	2.34236	2.23826	PF3D7_0923400	184	S	___1	YKLS(1)EK	4	MERGDGYKNSRKYKLSEKKYSPYDNERMKKY	PFI1150w
PF3D7_0907200		GTPase-activating protein, putative	No	0.384777	-2.49517	-2.1104	-2.53566	-2.45469	-2.09214	-2.12865	PF3D7_0907200	2	S	___1	S(0.998)ELKPLELEY(0.002)LDK	1	______________MSELKPLELEYLDKNVK	PFI0345w
PF3D7_1409900	CDS	cytidine diphosphate-diacylglycerol synthase	No	0.384728	-0.229692	0.155036	-0.15823	-0.301155	0.115461	0.194611	PF3D7_1409900	52	S	___2	S(0.602)KS(0.699)KS(0.617)LDDS(0.081)NGGIENMDK	1	ESSTVDEKGDIIKRRSKSKSLDDSNGGIENM	PF14_0097
PF3D7_1409900	CDS	cytidine diphosphate-diacylglycerol synthase	No	0.384728	-0.229692	0.155036	-0.15823	-0.301155	0.115461	0.194611	PF3D7_1409900	54	S	___2	S(0.975)KS(0.025)LDDSNGGIENMDKVK	1	STVDEKGDIIKRRSKSKSLDDSNGGIENMDK	PF14_0097
PF3D7_1409900	CDS	cytidine diphosphate-diacylglycerol synthase	No	0.384728	-0.229692	0.155036	-0.15823	-0.301155	0.115461	0.194611	PF3D7_1409900	56	S	___2	S(0.602)KS(0.699)KS(0.617)LDDS(0.081)NGGIENMDK	5	VDEKGDIIKRRSKSKSLDDSNGGIENMDKVK	PF14_0097
PF3D7_0520700		CDC73 domain-containing protein, putative	No	0.384652	-0.498477	-0.113825	-0.406399	-0.590555	-0.157169	-0.0704803	PF3D7_0520700	616	S	___1	ISYENEGHKS(1)DNEFDDNDDDDNMFEICK	10	CLAPQKISYENEGHKSDNEFDDNDDDDNMFE	MAL5P1.208;PFE1040c
PF3D7_0501400	FIRA	interspersed repeat antigen	Yes	0.384624	0.819512	1.20414	0.87849	0.760534	1.13519	1.27308	PF3D7_0501400	677	S	___2	AS(1)EGDNISLSSLSEETQEK	2	QESIATQEHADEKKASEGDNISLSSLSEETQ	MAL5P1.15;PFE0070w
PF3D7_0730900	PTP4	EMP1-trafficking protein	Yes	0.384573	2.21377	2.59835	2.33002	2.09752	2.60267	2.59402	PF3D7_0730900	2098	S	___1	GVNVQS(0.058)S(0.914)NT(0.029)NKHMPR	7	LGKHKHHEKGVNVQSSNTNKHMPRKMLR___	MAL7P1.171
PF3D7_0110500	BDP3	bromodomain protein, putative	No	0.384542	3.38305	3.76759	3.47993	3.28617	3.86686	3.66832	PF3D7_0110500	1626	S	___1	NLHEFIDDKS(0.996)T(0.004)EGNDEKR	10	YKNIFRNLHEFIDDKSTEGNDEKRSSHQNGT	MAL1P2.31;PFA0510w
PF3D7_1412300	NTF2	nuclear transport factor 2, putative	No	0.383862	-0.474273	-0.0904102	-0.35146	-0.597086	-0.16371	-0.0171108	PF3D7_1412300	51	S	___1	GT(0.009)S(0.991)QIIER	3	DISMMSFENDQCRGTSQIIERLNKLPPTVVH	PF14_0122
PF3D7_0305300		conserved Plasmodium membrane protein, unknown function	No	0.382903	1.21309	1.59599	1.18785	1.23833	1.60603	1.58595	PF3D7_0305300	10	S	___1	MDVYKEENS(1)DLLNHQEEEISR	9	______MMDVYKEENSDLLNHQEEEISRNSN	MAL3P2.17;PFC0240c
PF3D7_0516200	RPS11	40S ribosomal protein S11	No	0.382803	-2.42953	-2.04672	-2.43785	-2.42121	-2.13403	-1.95942	PF3D7_0516200	139	S	___1	IEDVT(0.001)PIPT(0.192)DS(0.656)T(0.152)R	11	LKIGRIEDVTPIPTDSTRKKSGRRGRRL___	MAL5P1.162;PFE0810c
PF3D7_1349500		conserved Plasmodium protein, unknown function	No	0.382563	-2.99812	-2.61555	-3.06625	-2.92999	-2.7306	-2.50051	PF3D7_1349500	2011	S	___1	GLYEEES(0.758)S(0.166)Y(0.067)EDS(0.008)R	7	KEIHFKMLKGLYEEESSYEDSRNSYYFLFGS	MAL13P1.249
PF3D7_1447900	MDR2	multidrug resistance protein 2	No	0.382402	1.4739	1.8563	1.55622	1.39157	1.92617	1.78643	PF3D7_1447900	269	S	___1	S(0.928)S(0.072)NFAYLNFFHK	1	NMDYNDIHNFQKKKKSSNFAYLNFFHKESKD	PF14_0455
PF3D7_1307800		fork head domain protein, putative	No	0.382373	3.99385	4.37622	4.11505	3.87264	4.40314	4.3493	PF3D7_1307800	297	S	___1	YS(0.001)S(0.999)DVENDK	3	RKKSKSSKILVDKYSSDVENDKKGVEEKYKD	PF13_0042
PF3D7_1343300		conserved Plasmodium protein, unknown function	No	0.382318	3.09638	3.4787	3.16968	3.02308	3.47568	3.48172	PF3D7_1343300	719	T	___1	T(0.998)PQES(0.002)NADDFIVIQDSPIK	1	SVTLEENKVLAHLARTPQESNADDFIVIQDS	PF13_0237
PF3D7_1227200	K1	potassium channel	Yes	0.382303	-1.03699	-0.654684	-0.93746	-1.13651	-0.491419	-0.817949	PF3D7_1227200	347	S	___1	DS(0.038)AS(0.962)LDNIQIFLGHR	4	INMNKDDDLMMKDSASLDNIQIFLGHRSSKF	2277.t00263;MAL12P1.263;PFL1315w
PF3D7_1441300		serine/threonine protein kinase, putative	No	0.382153	2.66116	3.04332	2.7776	2.54473	3.0183	3.06833	PF3D7_1441300	1540	S	___3	KY(0.022)S(0.993)S(0.993)LY(0.992)GKNEK	3	IETSNYFNKEHIKKYSSLYGKNEKKNDIINI	PF14_0392
PF3D7_1441300		serine/threonine protein kinase, putative	No	0.382153	2.66116	3.04332	2.7776	2.54473	3.0183	3.06833	PF3D7_1441300	1541	S	___3	KY(0.022)S(0.993)S(0.993)LY(0.992)GKNEK	4	ETSNYFNKEHIKKYSSLYGKNEKKNDIINIR	PF14_0392
PF3D7_1441300		serine/threonine protein kinase, putative	No	0.382153	2.66116	3.04332	2.7776	2.54473	3.0183	3.06833	PF3D7_1441300	1543	Y	___3	KY(0.127)S(0.895)S(0.982)LY(0.996)GKNEK	6	SNYFNKEHIKKYSSLYGKNEKKNDIINIRNF	PF14_0392
PF3D7_1466800		conserved Plasmodium protein, unknown function	No	0.381797	-3.06451	-2.68271	-3.16794	-2.96107	-2.61448	-2.75094	PF3D7_1466800	622	S	___1	NDAY(0.004)KY(0.063)S(0.968)T(0.971)DS(0.994)DDIERR	7	NSDLYNSMKNDAYKYSTDSDDIERRLTKGIE	PF14_0636
PF3D7_1110900		ES2 protein, putative	No	0.381592	2.50721	2.8888	2.54628	2.46815	2.90494	2.87267	PF3D7_1110900	441	S	___1	GVDQS(1)PIITWGK	5	YVNTPLIQAGKGVDQSPIITWGKIICTPKLV	PF11_0115
PF3D7_1416100	SEY1	protein SEY1, putative	No	0.381537	-2.20355	-1.82201	-2.23766	-2.16944	-1.9175	-1.72652	PF3D7_1416100	89	T	___1	GLWLSYDKFDDET(0.523)NNS(0.447)S(0.015)S(0.015)FFK	13	TTKGLWLSYDKFDDETNNSSSFFKLKKKNKP	PF14_0159
PF3D7_0922100		ubiquitin-like protein, putative	No	0.381107	0.382143	0.76325	0.596251	0.168036	0.735931	0.790569	PF3D7_0922100	1213	T	___2	SASHS(0.075)FS(0.925)DAT(0.577)S(0.385)S(0.038)HQEKQEK	10	NSYKSKSASHSFSDATSSHQEKQEKKNNLHN	PFI1085w
PF3D7_1478600	PTP3	EMP1-trafficking protein	Yes	0.380998	1.88129	2.26229	1.84322	1.91936	2.22941	2.29517	PF3D7_1478600;PF3D7_1477000	1031;776	S	___1	GIDDEES(0.162)S(0.838)NKGKNENK	8	KIAKTVLKGIDDEESSNKGKNENKKKKKKDK	PF14_0758
PF3D7_0401800	PfD80	Plasmodium exported protein (PHISTb), unknown function	Yes	0.380758	1.20087	1.58163	1.27885	1.12289	1.42661	1.73665	PF3D7_0401800	180	S	___1	SAS(0.002)T(0.002)AS(0.994)T(0.901)AS(0.101)AAS(1)AASTTR	12	STARSASTASTASAASAASTTRSASAASTTR	MAL4P1.16;PFD0080c
PF3D7_0922100		ubiquitin-like protein, putative	No	0.380708	0.680943	1.06165	0.842291	0.519594	1.02091	1.10239	PF3D7_0922100	1210	S	___2	SASHS(0.009)FS(0.991)DATSSHQEKQEK	7	KDTNSYKSKSASHSFSDATSSHQEKQEKKNN	PFI1085w
PF3D7_0729300	NMD3	60S ribosomal export protein NMD3, putative	No	0.380423	0.330832	0.711255	0.24872	0.412945	0.87499	0.54752	PF3D7_0729300	21	S	___1	MKS(1)PGK	3	DDELIIEGEHNDKMKSPGKSLIPCIKEKFNE	PF07_0121
PF3D7_1361800	GAC	glideosome-associated connector	No	0.380198	-3.44034	-3.06014	-3.34325	-3.53744	-2.8889	-3.23139	PF3D7_1361800	1399	S	___1	KY(0.007)NGS(0.988)MGNLIDQT(0.005)ITVMNLNR	5	NDEEGSKLLYKKYNGSMGNLIDQTITVMNLN	MAL13P1.308
PF3D7_1447900	MDR2	multidrug resistance protein 2	No	0.379968	-0.162592	0.217376	0.00518036	-0.330364	0.346621	0.088131	PF3D7_1447900	210	S	___1	SDENSGLLGT(0.017)DS(0.114)NS(0.756)T(0.114)IMNNEYLNLDYK	14	YKSDENSGLLGTDSNSTIMNNEYLNLDYKNL	PF14_0455
PF3D7_1330800		RNA-binding protein, putative	No	0.379922	2.29323	2.67315	2.32887	2.25759	2.63229	2.71401	PF3D7_1330800	40	S	___2	ATES(0.966)T(0.034)AVDS(1)EAK	9	DSNVDNKATESTAVDSEAKMEISSKVSEKKK	PF13_0165
PF3D7_1301400	HYP12	Plasmodium exported protein (hyp12), unknown function	Yes	0.379903	-0.388167	-0.00826454	-0.28545	-0.490885	-0.15633	0.139801	PF3D7_1301400	212	S	___1	KNY(0.008)ADS(0.992)IIDNMDLTENVK	6	KTFKNLNAAKKNYADSIIDNMDLTENVKNIF	PF13_0073
PF3D7_1321700	SF1	splicing factor 1	No	0.379678	0.109503	0.489181	0.12417	0.0948353	0.518511	0.45985	PF3D7_1321700	29	S	___2	EDKINGS(0.667)S(0.667)S(0.667)NKDELIENK	9	FEIKNSKEDKINGSSSNKDELIENKELKNDN	MAL13P1.120
PF3D7_0523900		conserved Plasmodium membrane protein, unknown function	No	0.379587	-0.239772	0.139815	-0.274439	-0.205105	0.14448	0.135151	PF3D7_0523900	181	S	___2	T(0.803)IS(0.013)AS(0.794)S(0.39)NNGNK	5	CNEDHHDHHNRTISASSNNGNKYYMNYDKNE	MAL5P1.238;PFE1190c
PF3D7_1140700		conserved Plasmodium protein, unknown function	No	0.379573	-1.1629	-0.783324	-1.10008	-1.22572	-0.845089	-0.72156	PF3D7_1140700	1610	S	___2	SEQDHINDDDNNINS(0.999)Y(0.001)DDESDVNFNNKK	15	RSEQDHINDDDNNINSYDDESDVNFNNKKND	PF11_0418
PF3D7_1140700		conserved Plasmodium protein, unknown function	No	0.379573	-1.1629	-0.783324	-1.10008	-1.22572	-0.845089	-0.72156	PF3D7_1140700	1615	S	___2	SEQDHINDDDNNINS(0.962)Y(0.038)DDES(1)DVNFNNKK	20	HINDDDNNINSYDDESDVNFNNKKNDYKGKR	PF11_0418
PF3D7_1223100	PKAr	cAMP-dependent protein kinase regulatory subunit	No	0.379277	-0.223192	0.156085	-0.25074	-0.195644	0.15008	0.16209	PF3D7_1223100	81	T	___1	T(0.5)DS(0.5)EILDGLDYSEMSK	1	SLSKKPSKTKIPITKTDSEILDGLDYSEMSK	2277.t00222;MAL12P1.222;PFL1110c
PF3D7_0731300	PfG174	Plasmodium exported protein (PHISTb), unknown function	Yes	0.379273	4.93256	5.31183	5.02474	4.84037	5.2273	5.39636	PF3D7_0731300	79	S	___2	NVKDGNDS(0.878)S(0.899)S(0.22)EELDNT(0.001)NVPTSKPK	9	NYSEVMKNVKDGNDSSSEELDNTNVPTSKPK	MAL7P1.174
PF3D7_0915400	PFK9	ATP-dependent 6-phosphofructokinase	No	0.379217	-1.98046	-1.60124	-1.99559	-1.96532	-1.59436	-1.60812	PF3D7_0915400	749	S	___2	S(0.507)NT(0.507)S(0.507)DVLS(0.185)S(0.185)EPVNQGFY(0.11)EQHASSYK	1	YNVNGDGMNTLNCQKSNTSDVLSSEPVNQGF	PFI0755c
PF3D7_0915400	PFK9	ATP-dependent 6-phosphofructokinase	No	0.379217	-1.98046	-1.60124	-1.99559	-1.96532	-1.59436	-1.60812	PF3D7_0915400	752	S	___2	S(0.005)NT(0.132)S(0.849)DVLS(0.013)SEPVNQGFYEQHASSYK	4	NGDGMNTLNCQKSNTSDVLSSEPVNQGFYEQ	PFI0755c
PF3D7_0915400	PFK9	ATP-dependent 6-phosphofructokinase	No	0.379217	-1.98046	-1.60124	-1.99559	-1.96532	-1.59436	-1.60812	PF3D7_0915400	751	T	___2	S(0.143)NT(0.71)S(0.143)DVLS(0.002)S(0.002)EPVNQGFYEQHASSYK	3	VNGDGMNTLNCQKSNTSDVLSSEPVNQGFYE	PFI0755c
PF3D7_1149000	Pf332	antigen 332, DBL-like protein	Yes	0.379052	-0.359032	0.0200205	-0.353039	-0.365025	-0.0731392	0.11318	PF3D7_1149000	148	S	___1	S(0.002)QCEERS(0.998)RDDTEDQFLR	7	RENGLDVCKSQCEERSRDDTEDQFLRFFAEW	PF11_0506;PF11_0507
PF3D7_0529800		conserved Plasmodium protein, unknown function	No	0.378757	0.0774136	0.45617	0.0759315	0.0788956	0.49543	0.41691	PF3D7_0529800	1366	S	___2	VENKINT(0.965)DDDLS(0.745)NS(0.29)K	12	NKSKVENKINTDDDLSNSKKSKNEKADKNDY	MAL5P1.294;PFE1485w
PF3D7_0529800		conserved Plasmodium protein, unknown function	No	0.378757	0.0774136	0.45617	0.0759315	0.0788956	0.49543	0.41691	PF3D7_0529800	1368	S	___2	INT(0.305)DDDLS(0.695)NS(1)KK	10	SKVENKINTDDDLSNSKKSKNEKADKNDYYD	MAL5P1.294;PFE1485w
PF3D7_1149000	Pf332	antigen 332, DBL-like protein	Yes	0.378707	-1.16027	-0.781565	-1.05088	-1.26966	-0.67045	-0.892679	PF3D7_1149000	3068	T	___1	EGS(0.011)AT(0.988)EEIVQDGSGTNDFVGK	5	DETNVEEVLEKEGSATEEIVQDGSGTNDFVG	PF11_0506;PF11_0507
PF3D7_1123100	CDPK7	calcium-dependent protein kinase 7	No	0.378622	1.80994	2.18857	1.86732	1.75257	2.25656	2.12057	PF3D7_1123100	1447	S	___1	S(1)QDGIEADVIKQGELNNEK	1	IFHNKVDEKRGSFSKSQDGIEADVIKQGELN	PF11_0242
PF3D7_1030300		conserved Plasmodium protein, unknown function	No	0.378617	-0.622447	-0.24383	-0.555229	-0.689665	-0.32148	-0.16618	PF3D7_1030300	462	S	___1	LNSTNGNIS(0.998)DNT(0.002)IATMHIDGNYK	9	SSNYYMKLNSTNGNISDNTIATMHIDGNYKY	PF10_0296
PF3D7_0302800		conserved Plasmodium protein, unknown function	No	0.378592	0.518888	0.89748	0.655611	0.382164	0.99543	0.79953	PF3D7_0302800	386	S	___1	NMPKS(1)DNDKR	5	KNDFSYNKKNKNMPKSDNDKRNNNNNNSSFN	MAL3P1.8;PFC0130c
PF3D7_1022400	SRSF4	serine/arginine-rich splicing factor 4	No	0.378442	-0.508177	-0.129735	-0.468319	-0.548035	-0.13405	-0.12542	PF3D7_1022400	354	S	___1	S(0.553)LS(0.447)EDRSNSR	1	SRRRTVSEDRSERRRSLSEDRSNSRKRNASS	PF10_0217
PF3D7_1429600	GEXP03	conserved Plasmodium protein, unknown function	Yes	0.378338	0.182498	0.560836	0.18758	0.177416	0.615831	0.50584	PF3D7_1429600	187	T	___1	NYNDMSTNNDGT(1)PRS(1)AAS(1)EECVHFK	12	TFLKNYNDMSTNNDGTPRSAASEECVHFKEK	PF14_0275
PF3D7_1202600	NEMF	conserved protein, unknown function	No	0.378268	-3.34812	-2.96985	-3.2694	-3.42684	-3.22152	-2.71818	PF3D7_1202600	2082	S	___1	LT(0.051)NS(0.949)PNEGDNLSFAIPMCAPYSAIQTHK	4	DDMDIKLNEIHKLTNSPNEGDNLSFAIPMCA	2277.t00026;MAL12P1.26;PFL0130c
PF3D7_0319700	ABCI3	ABC transporter I family member 1, putative	No	0.378072	1.2488	1.62687	1.2783	1.2193	1.63455	1.61919	PF3D7_0319700	1524	T	___1	DDTELT(1)DIEENISSK	6	NNNNSFYNMRDDTELTDIEENISSKKKKNKF	MAL3P7.4;PFC0875w
PF3D7_0801800		mannose-6-phosphate isomerase, putative	No	0.377583	5.58651	5.9641	5.61802	5.555	6.01517	5.91302	PF3D7_0801800	225	S	___1	RYS(1)DIEFASLNNDSTK	3	TKGSTLGGENDLKRYSDIEFASLNNDSTKEK	MAL8P1.156
PF3D7_0916700	HoMu	RNA-binding protein musashi, putative	No	0.377502	0.239613	0.617115	0.33305	0.146175	0.517811	0.716419	PF3D7_0916700	82	S	___2	GDEEEHDEKS(1)LGEDNK	10	SNISIKGDEEEHDEKSLGEDNKSVKDDESEA	PFI0820c
PF3D7_0916700	HoMu	RNA-binding protein musashi, putative	No	0.377502	0.239613	0.617115	0.33305	0.146175	0.517811	0.716419	PF3D7_0916700	89	S	___2	SLGEDNKS(1)VKDDESEAEK	8	DEEEHDEKSLGEDNKSVKDDESEAEKLRRLI	PFI0820c
PF3D7_1105400	RPS4	40S ribosomal protein S4, putative	No	0.377342	-0.696777	-0.319435	-0.507109	-0.886446	-0.37624	-0.26263	PF3D7_1105400	223	S	___1	LS(1)NVFVIGDNTKPYISLPR	2	IHVKDSRNKVFATRLSNVFVIGDNTKPYISL	PF11_0065
PF3D7_1442900	ARFGEF	protein transport protein SEC7, putative	No	0.377172	-2.33732	-1.96015	-2.40284	-2.2718	-2.02754	-1.89276	PF3D7_1442900	1125	S	___3	NIS(0.999)DDHS(0.001)VLNNNS(1)K	3	QKKNNKNSSNIHKNISDDHSVLNNNSKNSVA	PF14_0407
PF3D7_1442900	ARFGEF	protein transport protein SEC7, putative	No	0.377172	-2.33732	-1.96015	-2.40284	-2.2718	-2.02754	-1.89276	PF3D7_1442900	1129	S	___3	NIS(0.846)DDHS(0.993)VLNNNS(0.283)KNS(0.876)VAHY(0.003)ER	7	NKNSSNIHKNISDDHSVLNNNSKNSVAHYER	PF14_0407
PF3D7_1442900	ARFGEF	protein transport protein SEC7, putative	No	0.377172	-2.33732	-1.96015	-2.40284	-2.2718	-2.02754	-1.89276	PF3D7_1442900	1138	S	___3	NS(1)VAHYER	2	NISDDHSVLNNNSKNSVAHYERNDEGKKIDK	PF14_0407
PF3D7_0603400	TEX1	trophozoite exported protein 1	No	0.377028	3.18241	3.55943	3.24617	3.11864	3.57098	3.54789	PF3D7_0603400	804	S	___1	DNSFNEES(0.003)KS(0.997)EEGKIQLR	10	SGIHIKDNSFNEESKSEEGKIQLRDIQNDND	2270.t00281;MAL6P1.37;PFF0165c
PF3D7_1206800		conserved Plasmodium protein, unknown function	No	0.376872	3.86473	4.2416	3.95805	3.77142	4.32806	4.15515	PF3D7_1206800	410	S	___1	YCDES(1)DDEDIYTDNIIFSQIHGLK	5	IQLKLDKQFNRYCDESDDEDIYTDNIIFSQI	2277.t00069;MAL12P1.68;PFL0340w
PF3D7_1361800	GAC	glideosome-associated connector	No	0.376753	-0.998853	-0.6221	-1.59782	-0.399885	-0.32604	-0.918159	PF3D7_1361800	604	S	___1	IES(1)LKNILESK	3	AYKTLAAISGLSRIESLKNILESKGADTSIF	MAL13P1.308
PF3D7_0913300		conserved Plasmodium protein, unknown function	No	0.376383	-1.30765	-0.931265	-1.19371	-1.42159	-1.02994	-0.83259	PF3D7_0913300	323	S	___1	CMDTDPCDDIS(0.774)S(0.184)S(0.042)ENIDNKEISSQQELCSFR	11	LDINRCMDTDPCDDISSSENIDNKEISSQQE	PFI0650c
PF3D7_0731300	PfG174	Plasmodium exported protein (PHISTb), unknown function	Yes	0.376363	4.65349	5.02986	4.75007	4.55692	4.94535	5.11436	PF3D7_0731300	78	S	___2	NVKDGNDS(0.995)S(0.868)S(0.136)EELDNTNVPTSKPK	8	SNYSEVMKNVKDGNDSSSEELDNTNVPTSKP	MAL7P1.174
PF3D7_0306800	CCT2	T-complex protein 1 subunit beta	No	0.376297	-1.32408	-0.94778	-1.41785	-1.2303	-0.7938	-1.10176	PF3D7_0306800	262	S	___1	VNVHS(1)FEDVQDLENEER	5	DTDKIKIYGTKVNVHSFEDVQDLENEERLKM	MAL3P2.26;PFC0285c
PF3D7_1365000		conserved Plasmodium protein, unknown function	No	0.376244	-0.905448	-0.529204	-0.9622	-0.848696	-0.522839	-0.53557	PF3D7_1365000	22	T	___1	NKNGDT(1)DIDNDTR	6	FNKNKENKNRNKNGDTDIDNDTRNNKSYKEN	PF13_0342
PF3D7_1478600	PTP3	EMP1-trafficking protein	Yes	0.376158	-0.879772	-0.503614	-0.71784	-1.0417	-0.626019	-0.38121	PF3D7_1478600	444	S	___1	QGANPFIENDVS(1)DKKDNLQDSNK	12	KQIKQGANPFIENDVSDKKDNLQDSNKGLNV	PF14_0758
PF3D7_1466400	ApiAP2	AP2 domain transcription factor AP2-SP	No	0.376148	-2.02033	-1.64418	-2.11189	-1.92878	-1.63371	-1.65466	PF3D7_1466400	813	S	___1	SNSYDNS(0.355)ES(0.645)	9	MNLNGNKSNSYDNSES_______________	PF14_0633
PF3D7_1139300	ApiAP2	AP2 domain transcription factor, putative	No	0.375989	0.233242	0.609231	0.23543	0.231054	0.563341	0.655121	PF3D7_1139300	1777	T	___1	NDDDEDDGNNT(1)DNS(1)KILR	11	SQYHKNDDDEDDGNNTDNSKILRSFDKCSNE	PF11_0404
PF3D7_1445700		conserved Plasmodium protein, unknown function	No	0.375916	0.395708	0.771625	0.415001	0.376415	0.78249	0.760759	PF3D7_1445700	24	S	___1	FSVFDS(1)DDNS(1)EEEIENK	10	VHTTNKFSVFDSDDNSEEEIENKDLNESPKN	PF14_0434
PF3D7_0614300	MFR1	major facilitator superfamily-related transporter, putative	No	0.375712	-0.682097	-0.306385	-0.89867	-0.465525	-0.0615597	-0.55121	PF3D7_0614300	467	S	___1	KS(1)NMVAAIYEEDAVFR	2	SDHKLYNENFKLNKKSNMVAAIYEEDAVFRN	2270.t00033;MAL6P1.283;PFF0690c
PF3D7_1312800		conserved Plasmodium protein, unknown function	No	0.375689	-0.282838	0.0928507	-0.33687	-0.228806	0.0591507	0.126551	PF3D7_1312800	2	S	___1	S(1)FLLALNESK	1	______________MSFLLALNESKKSAEGS	PF13_0072
PF3D7_1149000	Pf332	antigen 332, DBL-like protein	Yes	0.375607	-1.80745	-1.43184	-1.93913	-1.67578	-1.42106	-1.44263	PF3D7_1149000	1462	S	___2	S(0.007)VS(0.993)EEVLEEEGS(0.879)T(0.108)T(0.014)EK	3	VASITEEVEEEEKSVSEEVLEEEGSTTEKVV	PF11_0506;PF11_0507
PF3D7_0627800	ACS	acetyl-CoA synthetase, putative	No	0.375058	1.04667	1.42173	1.09414	0.999195	1.41009	1.43336	PF3D7_0627800	453	S	___2	ISYS(0.994)EKS(0.005)YS(0.001)K	4	KKITKNNPINHKISYSEKSYSKELINTDMVN	2270.t00165;MAL6P1.150;PFF1350c
PF3D7_1140700		conserved Plasmodium protein, unknown function	No	0.374908	-3.22532	-2.85041	-3.41367	-3.03697	-2.90503	-2.79579	PF3D7_1140700	2220	S	___2	DLS(0.015)LT(0.799)S(0.811)Y(0.375)EMEER	6	NNNNNNNIIKDLSLTSYEMEERLSSMSVINK	PF11_0418
PF3D7_1140700		conserved Plasmodium protein, unknown function	No	0.374908	-3.22532	-2.85041	-3.41367	-3.03697	-2.90503	-2.79579	PF3D7_1140700	2219	T	___2	DLS(0.015)LT(0.799)S(0.811)Y(0.375)EMEER	5	DNNNNNNNIIKDLSLTSYEMEERLSSMSVIN	PF11_0418
PF3D7_0807900	TyrRS	tyrosine--tRNA ligase	No	0.374882	3.03773	3.41261	3.08116	2.9943	3.4018	3.42342	PF3D7_0807900	264	S	___1	SDENSAIFMDDSES(1)DVNRK	14	SKSDENSAIFMDDSESDVNRKIKKAYCPPNV	MAL8P1.125
PF3D7_0322900	RPS3A	40S ribosomal protein S3A, putative	No	0.374778	-1.50195	-1.12717	-1.55546	-1.44843	-1.22299	-1.03135	PF3D7_0322900	106	T	___1	DCY(0.002)T(0.013)DFCGLS(0.38)IT(0.606)R	12	IINRDCYTDFCGLSITRDKLCSLIRKGYTLI	MAL3P7.35;PFC1020c
PF3D7_0606000	KIC1	conserved Plasmodium protein, unknown function	No	0.374748	1.61032	1.98507	1.69878	1.52185	1.99378	1.97635	PF3D7_0606000	470	S	___2	NTDVDKS(1)DESPLSEQNAEIDNHNVLINR	7	SVMSEIYNRNTDVDKSDESPLSEQNAEIDNH	2270.t00255;MAL6P1.63;PFF0295c
PF3D7_0730900	PTP4	EMP1-trafficking protein	Yes	0.374483	3.46226	3.83674	3.4914	3.43312	3.83489	3.83859	PF3D7_0730900	1197	S	___1	SFS(0.992)S(0.008)QGIRQDFPYK	3	GMKGQKYGSKNVRSFSSQGIRQDFPYKNENN	MAL7P1.171
PF3D7_0319700	ABCI3	ABC transporter I family member 1, putative	No	0.374393	2.73406	3.10845	2.70737	2.76074	3.03711	3.17979	PF3D7_0319700	839	S	___1	DNSNDFMLEGS(1)DEDDTCYELDTLHK	11	THQLKDNSNDFMLEGSDEDDTCYELDTLHKK	MAL3P7.4;PFC0875w
PF3D7_0401800	PfD80	Plasmodium exported protein (PHISTb), unknown function	Yes	0.374377	1.43709	1.81147	1.4444	1.42978	1.72502	1.89791	PF3D7_0401800	82	S	___1	S(0.018)PS(0.03)T(0.037)AS(0.791)T(0.129)S(0.446)T(0.56)S(0.99)LR	10	ASTTKRSPSTASTSTSLRSASTASTASTLRS	MAL4P1.16;PFD0080c
PF3D7_0106400		pre-rRNA-processing protein TSR2, putative	No	0.373922	1.25023	1.62416	1.20805	1.29242	1.53747	1.71084	PF3D7_0106400	118	S	___1	NIQIYDIS(0.002)CS(0.998)QEK	10	ILEKIKNIQIYDISCSQEKNLIQNYEQGDEE	MAL1P1.55;PFA0315w
PF3D7_1110400		RNA-binding protein, putative	No	0.373652	-0.720182	-0.34653	-0.368849	-1.07152	-0.0446491	-0.648411	PF3D7_1110400	1299	S	___1	TYDKHS(0.974)S(0.024)S(0.002)R	6	SYDYNNRKHRTYDKHSSSRNNYDRKRNSRYS	PF11_0111
PF3D7_1022400	SRSF4	serine/arginine-rich splicing factor 4	No	0.373487	0.0458574	0.419345	0.0125008	0.0792141	0.359631	0.479059	PF3D7_1022400	213	S	___2	RY(0.002)S(0.998)NES(1)GLS(1)DR	9	PKYKKRRRYSNESGLSDRDRSRSRRYSKSSN	PF10_0217
PF3D7_0212500		conserved Plasmodium protein, unknown function	No	0.373442	-1.17442	-0.800975	-1.17164	-1.17719	-0.73657	-0.865379	PF3D7_0212500	35	S	___1	DSSHSNINS(1)DLDVDR	9	FENDYSKDSSHSNINSDLDVDRKKHSDNVYE	PF02_0117;PFB0560w
PF3D7_0830500	TryThrA	sporozoite and liver stage tryptophan-rich protein, putative	Yes	0.373413	-2.79555	-2.42213	-2.93038	-2.66072	-2.4368	-2.40747	PF3D7_0830500	105	S	___3	ELADAET(0.453)T(0.733)DT(0.717)S(0.182)DS(0.915)EDEDHIINKK	13	ASKELADAETTDTSDSEDEDHIINKKVKRRK	PF08_0003
PF3D7_0830500	TryThrA	sporozoite and liver stage tryptophan-rich protein, putative	Yes	0.373413	-2.79555	-2.42213	-2.93038	-2.66072	-2.4368	-2.40747	PF3D7_0830500	100	T	___3	ELADAET(0.003)T(0.997)DT(0.039)S(0.958)DS(0.003)EDEDHIINKK	8	ITAAIASKELADAETTDTSDSEDEDHIINKK	PF08_0003
PF3D7_0830500	TryThrA	sporozoite and liver stage tryptophan-rich protein, putative	Yes	0.373413	-2.79555	-2.42213	-2.93038	-2.66072	-2.4368	-2.40747	PF3D7_0830500	102	T	___3	ELADAET(0.453)T(0.733)DT(0.717)S(0.182)DS(0.915)EDEDHIINKK	10	AAIASKELADAETTDTSDSEDEDHIINKKVK	PF08_0003
PF3D7_1212700	EIF3A	eukaryotic translation initiation factor 3 subunit A, putative	No	0.373407	4.54304	4.91645	4.42846	4.65763	5.01077	4.82213	PF3D7_1212700	1242	S	___1	S(1)GKPENEKK	1	DRDDKLDRDSRRRERSGKPENEKKRENDISK	2277.t00126;MAL12P1.125;PFL0625c
PF3D7_0801000		Plasmodium exported protein (PHISTc), unknown function	Yes	0.373397	-0.232777	0.14062	-0.157709	-0.307844	0.0945702	0.18667	PF3D7_0801000	393	S	___1	LKDEPVDDNT(0.5)S(0.5)NILKDEPVDDHAGK	11	NTINKLKDEPVDDNTSNILKDEPVDDHAGKH	PF08_0137
PF3D7_0801000		Plasmodium exported protein (PHISTc), unknown function	Yes	0.373397	-0.232777	0.14062	-0.157709	-0.307844	0.0945702	0.18667	PF3D7_0801000	392	T	___1	LKDEPVDDNT(0.5)S(0.5)NILKDEPVDDHAGK	10	NNTINKLKDEPVDDNTSNILKDEPVDDHAGK	PF08_0137
PF3D7_1140700		conserved Plasmodium protein, unknown function	No	0.373322	0.278928	0.65225	0.227612	0.330244	0.680801	0.623699	PF3D7_1140700	1000	S	___2	SYS(1)NNSAYVNR	3	GKNIVKNLFCNKKSYSNNSAYVNRGISEYAE	PF11_0418
PF3D7_1140700		conserved Plasmodium protein, unknown function	No	0.373322	0.278928	0.65225	0.227612	0.330244	0.680801	0.623699	PF3D7_1140700	1003	S	___2	S(0.01)Y(0.001)S(0.989)NNS(1)AYVNR	6	IVKNLFCNKKSYSNNSAYVNRGISEYAEENI	PF11_0418
PF3D7_0723800		conserved Plasmodium protein, unknown function	No	0.373012	1.49131	1.86432	1.5344	1.44823	1.82436	1.90429	PF3D7_0723800	531	S	___1	IVGDNFLEDLDKS(1)PIDK	13	NDKIVGDNFLEDLDKSPIDKLLYKSNNRINN	PF07_0101
PF3D7_0322900	RPS3A	40S ribosomal protein S3A, putative	No	0.372708	-0.0663328	0.306376	0.0118504	-0.144516	0.38294	0.229811	PF3D7_0322900	112	S	___1	DKLCS(1)LIR	5	YTDFCGLSITRDKLCSLIRKGYTLIEGHTDV	MAL3P7.35;PFC1020c
PF3D7_0424700	FIKK4.2	serine/threonine protein kinase, FIKK family	Yes	0.372637	2.06602	2.43865	2.11679	2.01525	2.35885	2.51846	PF3D7_0424700	123	S	___1	KTEENS(1)EEIRK	6	RCSNLLKEKKKTEENSEEIRKYLSDKTKKRN	MAL4P1.230;PFD1175w
PF3D7_0812500		RNA-binding protein, putative	No	0.372512	-3.59389	-3.22138	-3.47611	-3.71167	-3.25183	-3.19093	PF3D7_0812500	11	S	___3	KS(1)EERLEEER	2	_____MFFNFSRKKKSEERLEEERSNTCEET	PF08_0086
PF3D7_0812500		RNA-binding protein, putative	No	0.372512	-3.59389	-3.22138	-3.47611	-3.71167	-3.25183	-3.19093	PF3D7_0812500	20	S	___3	LEEERS(1)NT(1)CEETEQVEETSNNK	6	FSRKKKSEERLEEERSNTCEETEQVEETSNN	PF08_0086
PF3D7_0812500		RNA-binding protein, putative	No	0.372512	-3.59389	-3.22138	-3.47611	-3.71167	-3.25183	-3.19093	PF3D7_0812500	22	T	___3	LEEERS(1)NT(1)CEETEQVEETSNNK	8	RKKKSEERLEEERSNTCEETEQVEETSNNKR	PF08_0086
PF3D7_0812500		RNA-binding protein, putative	No	0.372512	-3.59389	-3.22138	-3.47611	-3.71167	-3.25183	-3.19093	PF3D7_0812500	26	T	___3	LEEERS(0.451)NT(0.557)CEET(0.986)EQVEET(0.005)S(0.001)NNK	12	SEERLEEERSNTCEETEQVEETSNNKRGRKQ	PF08_0086
PF3D7_1249100		conserved Plasmodium protein, unknown function	No	0.372413	-1.63249	-1.26007	-1.77044	-1.49454	-1.1557	-1.36445	PF3D7_1249100	104	S	___1	KENS(1)DYIR	4	SNVEKQLNEEIRKENSDYIRFAPLRNIIKNF	2277.t00471;MAL12P1.470;PFL2355w
PF3D7_1427600	MIT3	CorA-like Mg2+ transporter protein, putative	No	0.372192	2.73123	3.10342	2.69181	2.77065	3.16417	3.04267	PF3D7_1427600	76	S	___1	RNSS(1)EEYR	4	SSYMNYIKRGFKRNSSEEYRIHNNISDEEHI	PF14_0255
PF3D7_1022000		RNA-binding protein, putative	No	0.371983	-2.48139	-2.10941	-2.38729	-2.57549	-2.18497	-2.03385	PF3D7_1022000	719	S	___1	NKFPLNNS(0.998)NNCDS(0.001)VPSIYPK	8	SLLENEYKNKFPLNNSNNCDSVPSIYPKMFT	PF10_0214
PF3D7_1002400.2-p1		RNA-binding protein, putative		0.371958	0.234723	0.606681	0.0583611	0.411085	0.575451	0.637911	PF3D7_1002400.2-p1;PF3D7_1002400	8;8	S	___3	EAHS(1)ES(1)EEPVHK	4	________MSSKEAHSESEEPVHKNDGSTLY
PF3D7_0302100	SRPK1	serine/threonine protein kinase	No	0.371952	2.59406	2.96601	2.66261	2.52551	2.92585	3.00618	PF3D7_0302100	400	S	___1	INDCHS(1)PNENKNK	6	IKNNISIKEKINDCHSPNENKNKDNHNQCED	MAL3P1.1;PFC0105w
PF3D7_1414500	ABCk2	atypical protein kinase, ABC-1 family, putative	No	0.371747	-2.26749	-1.89575	-2.44304	-2.09195	-1.95747	-1.83402	PF3D7_1414500	1259	T	___1	S(0.004)NKDT(0.643)ES(0.353)NPNK	5	HHHHHDNNINKSNKDTESNPNKSINIYPNIS	PF14_0143
PF3D7_0411800		conserved Plasmodium protein, unknown function	No	0.371433	-0.178118	0.193316	-0.0146103	-0.341625	0.26016	0.126471	PF3D7_0411800	838	S	___1	IKS(1)DDDTFSLGMNENNCYIISK	3	YEGSEGVVIHKNKIKSDDDTFSLGMNENNCY	MAL4P2.50;PFD0585c
PF3D7_1104200	SNF2L	chromatin remodeling protein	No	0.371378	-2.73273	-2.36135	-2.63859	-2.82687	-2.2291	-2.4936	PF3D7_1104200	812	S	___1	T(0.008)QDIS(0.172)S(0.779)IS(0.042)DEDIDIILADAEKR	6	LNFGAPEVYKTQDISSISDEDIDIILADAEK	PF11_0053
PF3D7_1448300		conserved Plasmodium protein, unknown function	No	0.370703	-3.92394	-3.55323	-3.88501	-3.96286	-3.8079	-3.29857	PF3D7_1448300	169	S	___1	NTEGYDENILNDEGNLS(1)DEGEEVEEENVDER	17	TEGYDENILNDEGNLSDEGEEVEEENVDERD	PF14_0461
PF3D7_1119300	U2AF1	splicing factor U2AF small subunit, putative	No	0.370608	-2.41838	-2.04777	-2.63717	-2.19958	-1.87773	-2.21781	PF3D7_1119300	228	S	___1	S(0.778)S(0.222)HHY(0.041)S(0.79)S(0.169)K	1	ESYREGKDKYKRDRRSSHHYSSKRKNRSDNE	PF11_0200
PF3D7_1445400	CLK1	protein serine/threonine kinase-1	No	0.370598	0.345583	0.716181	0.458031	0.233135	0.777802	0.65456	PF3D7_1445400	412	S	___1	VYDS(1)LKR	4	KRKKKKYSNESKVYDSLKRDETNHHTNNNSY	PF14_0431
PF3D7_0401800	PfD80	Plasmodium exported protein (PHISTb), unknown function	Yes	0.370078	4.62246	4.99254	4.72271	4.52221	4.89671	5.08837	PF3D7_0401800	135	S	___1	S(1)AS(1)AASTTR	3	STASTASAASTTRSASAASTTRSASAASTTR	MAL4P1.16;PFD0080c
PF3D7_1305000		conserved Plasmodium protein, unknown function	No	0.369827	0.997443	1.36727	1.1591	0.835785	1.30391	1.43063	PF3D7_1305000	630	S	___1	QNINLNDDNTKDDAS(1)NYNYEESAECTMKK	15	KQNINLNDDNTKDDASNYNYEESAECTMKKL	PF13_0024
PF3D7_1222000		tRNA-splicing ligase RtcB, putative	No	0.369473	0.904898	1.27437	0.937721	0.872074	1.25892	1.28982	PF3D7_1222000	457	T	___2	EYMYVT(1)RKGAT(0.531)S(0.429)S(0.04)K	6	MYLDNNEIKKEYMYVTRKGATSSKKNQYGII	2277.t00212;MAL12P1.212;PFL1060c
PF3D7_1222000		tRNA-splicing ligase RtcB, putative	No	0.369473	0.904898	1.27437	0.937721	0.872074	1.25892	1.28982	PF3D7_1222000	462	T	___2	EYMYVT(1)RKGAT(0.531)S(0.429)S(0.04)K	11	NEIKKEYMYVTRKGATSSKKNQYGIIPGNMK	2277.t00212;MAL12P1.212;PFL1060c
PF3D7_0302500	CLAG3.1	cytoadherence linked asexual protein 3.1	Yes	0.369409	-1.31001	-0.940604	-1.22846	-1.39157	-0.883059	-0.99815	PF3D7_0302500	1326	T	___1	MS(0.051)T(0.945)Y(0.003)VDDFAFFDDCGKNEQFLNER	3	LRRYDMENAFKNKMSTYVDDFAFFDDCGKNE	MAL3P1.5;PFC0120w
PF3D7_0625200		conserved Plasmodium protein, unknown function	No	0.369317	-0.132622	0.236695	0.0157509	-0.280994	0.282921	0.19047	PF3D7_0625200	376	S	___1	ELFENS(1)IDKDIFSDT	6	KKERAKGKGKELFENSIDKDIFSDT______	2270.t00139;MAL6P1.176;PFF1220w
PF3D7_0509800	PI4K	phosphatidylinositol 4-kinase	No	0.369232	0.564418	0.93365	0.545971	0.582865	0.8822	0.9851	PF3D7_0509800	1181	S	___1	KNS(1)NNEFIDYNEHMVK	3	NIEKNETFEEMKRKNSNNEFIDYNEHMVKLS	MAL5P1.99;PFE0485w
PF3D7_1149000	Pf332	antigen 332, DBL-like protein	Yes	0.369062	-1.25171	-0.882649	-1.20888	-1.29454	-0.80271	-0.962589	PF3D7_1149000	1391	T	___1	EAS(0.073)IT(0.927)EEVEQIEPVTGK	5	REGSINEDIVKEASITEEVEQIEPVTGKVEK	PF11_0506;PF11_0507
PF3D7_0415200		conserved Plasmodium protein, unknown function	No	0.369013	-1.09531	-0.726299	-1.18009	-1.01053	-0.576399	-0.8762	PF3D7_0415200	1605	S	___2	KY(0.005)EY(0.016)LDFS(0.914)EKS(0.511)T(0.474)EY(0.081)NNK	8	INNKLNDKKYEYLDFSEKSTEYNNKCLKVDN	MAL4P1.142;PFD0735c
PF3D7_0415200		conserved Plasmodium protein, unknown function	No	0.369013	-1.09531	-0.726299	-1.18009	-1.01053	-0.576399	-0.8762	PF3D7_0415200	1608	S	___2	KY(0.005)EY(0.016)LDFS(0.914)EKS(0.511)T(0.474)EY(0.081)NNK	11	KLNDKKYEYLDFSEKSTEYNNKCLKVDNVNI	MAL4P1.142;PFD0735c
PF3D7_0416800	SAR1	small GTP-binding protein sar1	No	0.368923	-0.432583	-0.0636597	-0.44323	-0.421936	-0.05019	-0.0771294	PF3D7_0416800	138	S	___1	IDKPDAAS(1)EDELR	8	PFVVLGNKIDKPDAASEDELRQHLNLFSNIT	MAL4P1.157;PFD0810w
PF3D7_0613700		syntaxin binding protein, putative	No	0.368592	-1.5495	-1.18091	-1.50815	-1.59085	-1.09329	-1.26852	PF3D7_0613700	104	S	___3	Y(1)KNIHILFT(1)S(1)NISK	10	DEKCAKYKNIHILFTSNISKDNQILDLIASN	2270.t00027;MAL6P1.288;PFF0665c
PF3D7_0613700		syntaxin binding protein, putative	No	0.368592	-1.5495	-1.18091	-1.50815	-1.59085	-1.09329	-1.26852	PF3D7_0613700	103	T	___3	Y(1)KNIHILFT(1)S(1)NISK	9	KDEKCAKYKNIHILFTSNISKDNQILDLIAS	2270.t00027;MAL6P1.288;PFF0665c
PF3D7_0613700		syntaxin binding protein, putative	No	0.368592	-1.5495	-1.18091	-1.50815	-1.59085	-1.09329	-1.26852	PF3D7_0613700	95	Y	___3	Y(1)KNIHILFT(1)S(1)NISK	1	VDIMINDFKDEKCAKYKNIHILFTSNISKDN	2270.t00027;MAL6P1.288;PFF0665c
PF3D7_0708800	HSP110c	heat shock protein 110	No	0.368573	-1.58904	-1.22046	-1.458	-1.72008	-1.27311	-1.16782	PF3D7_0708800	863	T	___2	NNEEKENS(0.389)T(0.611)KNENS(1)ANPEE	9	EQNNEAKNNEEKENSTKNENSANPEE_____	PF07_0033
PF3D7_0826500	UBE4B	ubiquitin conjugation factor E4 B, putative	No	0.368247	1.9588	2.32705	1.99874	1.91887	2.37677	2.27733	PF3D7_0826500	726	S	___1	NGS(1)LDEDLNRDER	3	GVVENNQMNESGRNGSLDEDLNRDEREGINI	PF08_0020
PF3D7_0730300	ApiAP2	AP2 domain transcription factor AP2-L, putative	No	0.367978	-3.35024	-2.98226	-3.29409	-3.40639	-2.88895	-3.07557	PF3D7_0730300	901	S	___1	CNQDS(0.054)Y(0.001)S(0.729)T(0.217)NEEPLS(0.098)NHS(0.902)INDPGK	17	NQDSYSTNEEPLSNHSINDPGKIKDGIMYDG	PF07_0126
PF3D7_0912900	RPN8	26S proteasome regulatory subunit RPN8, putative	No	0.367863	0.809618	1.17748	0.86499	0.754246	1.12351	1.23145	PF3D7_0912900	302	S	___1	S(1)LENDIEKDK	1	INNKIENKLNSEKKKSLENDIEKDKIKDKEK	PFI0630w
PF3D7_1345400		conserved Plasmodium protein, unknown function	No	0.367718	1.12425	1.49197	1.21487	1.03362	1.38113	1.6028	PF3D7_1345400	1395	S	___2	FHQNLS(1)DVT(1)VT(1)EEEKLDEYEK	6	IVIKKKRKIRFHQNLSDVTVTEEEKLDEYEK	MAL13P1.226
PF3D7_1345400		conserved Plasmodium protein, unknown function	No	0.367718	1.12425	1.49197	1.21487	1.03362	1.38113	1.6028	PF3D7_1345400	1400	T	___2	FHQNLS(1)DVT(1)VT(1)EEEKLDEYEK	11	KRKIRFHQNLSDVTVTEEEKLDEYEKTKKKQ	MAL13P1.226
PF3D7_0922100		ubiquitin-like protein, putative	No	0.367667	1.13461	1.50228	1.21156	1.05766	1.51579	1.48877	PF3D7_0922100	1199	S	___1	SSNENNLFKDT(0.018)NS(0.982)YK	13	KKKSSNENNLFKDTNSYKSKSASHSFSDATS	PFI1085w
PF3D7_1123100	CDPK7	calcium-dependent protein kinase 7	No	0.367553	0.678272	1.04583	0.81505	0.541494	1.00679	1.08486	PF3D7_1123100	883	S	___2	NANS(1)S(1)FES(1)EHEDLKR	4	EYSIHKDKDDKKNANSSFESEHEDLKRQFIN	PF11_0242
PF3D7_1123100	CDPK7	calcium-dependent protein kinase 7	No	0.367553	0.678272	1.04583	0.81505	0.541494	1.00679	1.08486	PF3D7_1123100	887	S	___2	NANS(1)S(1)FES(1)EHEDLKR	8	HKDKDDKKNANSSFESEHEDLKRQFINMKEK	PF11_0242
PF3D7_1223100	PKAr	cAMP-dependent protein kinase regulatory subunit	No	0.367258	1.22395	1.59121	1.08634	1.36156	1.8354	1.34701	PF3D7_1223100	66	S	___1	GFS(0.975)LS(0.025)K	3	NNDGEDDRYKFSRGFSLSKKPSKTKIPITKT	2277.t00222;MAL12P1.222;PFL1110c
PF3D7_1442900	ARFGEF	protein transport protein SEC7, putative	No	0.366802	-0.782137	-0.415335	-0.724899	-0.839375	-0.4816	-0.34907	PF3D7_1442900	1828	S	___1	NNENLKHEDRENENHS(1)DGHNAER	16	NNENLKHEDRENENHSDGHNAERNDIDEEDS	PF14_0407
PF3D7_0923400		conserved Plasmodium protein, unknown function	No	0.366713	0.135192	0.501904	0.11607	0.154314	0.445	0.558809	PF3D7_0923400	324	T	___2	RS(0.391)T(0.647)DT(0.962)VDNYK	3	VISHYEFDKPCEKRSTDTVDNYKNNIRYKKE	PFI1150w
PF3D7_0201900	EMP3	erythrocyte membrane protein 3	Yes	0.366657	3.26618	3.63284	3.37058	3.16178	3.57888	3.68679	PF3D7_0201900	2422	S	___1	NVKDDELS(1)DNESSDNEK	8	NKPTDGLKNVKDDELSDNESSDNEKSKKNLR	PF02_0019;PFB0095c
PF3D7_0914500		conserved Plasmodium protein, unknown function	No	0.366623	0.360622	0.727245	0.456961	0.264284	0.65852	0.795971	PF3D7_0914500	1027	S	___1	MDVSYY(0.047)S(0.929)DNS(0.023)VQIK	7	DKNPYKNYKMDVSYYSDNSVQIKEKRKKSSI	PFI0710c
PF3D7_1021700		conserved Plasmodium membrane protein, unknown function	No	0.366343	-2.86834	-2.50199	-2.9542	-2.78248	-2.50765	-2.49634	PF3D7_1021700	2017	S	___1	SYS(0.5)T(0.5)HQSYR	3	DNHMNENIRGSHRSYSTHQSYRTHQSYKRHA	PF10_0211;PF10_0212
PF3D7_1021700		conserved Plasmodium membrane protein, unknown function	No	0.366343	-2.86834	-2.50199	-2.9542	-2.78248	-2.50765	-2.49634	PF3D7_1021700	2018	T	___1	SYS(0.5)T(0.5)HQSYR	4	NHMNENIRGSHRSYSTHQSYRTHQSYKRHAN	PF10_0211;PF10_0212
PF3D7_1430300		acid phosphatase, putative	No	0.365743	2.30724	2.67299	2.49031	2.12417	2.77021	2.57576	PF3D7_1430300	1215	S	___1	DT(0.079)S(0.921)KNFNMCK	3	DELQKKDKDQHQRDTSKNFNMCKYDTKQNFL	PF14_0282
PF3D7_0723900		RNA-binding protein, putative	No	0.365619	-2.07872	-1.7131	-2.15192	-2.00553	-1.72289	-1.70332	PF3D7_0723900	421	S	___1	VNTNNS(1)AYR	6	NNNFSYNNSRVNTNNSAYRGKNNNMQNEKNN	MAL7P1.126
PF3D7_0601900		conserved Plasmodium protein, unknown function	Yes	0.365592	5.1347	5.50029	5.21763	5.05177	5.45385	5.54673	PF3D7_0601900	96	S	___1	HS(0.001)S(0.999)LPNER	3	EDDDDDDDYQPPRHSSLPNERKTSSSSRQAA	2270.t00296;MAL6P1.22;PFF0090w
PF3D7_1314700		pinin/SDK/MemA domain-containing protein, putative	No	0.365512	0.731138	1.09665	0.818241	0.644035	1.15981	1.03349	PF3D7_1314700	58	S	___1	IS(0.175)S(0.825)NENLDKLPEFK	3	HNVEDIKKIKQKRISSNENLDKLPEFKIEKR	MAL13P1.75
PF3D7_0104300	UBP1	ubiquitin carboxyl-terminal hydrolase 1, putative	No	0.365294	-1.62984	-1.26454	-1.4426	-1.81708	-1.43452	-1.09457	PF3D7_0104300	1105	S	___2	YS(0.006)PS(0.994)DHEK	4	IHTYIVETRKDKYSPSDHEKQNSFIKERVLH	MAL1P1.34b;PFA0215w;PFA0220w
PF3D7_0104300	UBP1	ubiquitin carboxyl-terminal hydrolase 1, putative	No	0.365294	-1.62984	-1.26454	-1.4426	-1.81708	-1.43452	-1.09457	PF3D7_0104300	1112	S	___2	YS(0.09)PS(0.91)DHEKQNS(1)FIK	11	TRKDKYSPSDHEKQNSFIKERVLHSKKKIKG	MAL1P1.34b;PFA0215w;PFA0220w
PF3D7_0105800		conserved Plasmodium protein, unknown function	No	0.365203	2.77013	3.13533	2.92901	2.61124	3.20665	3.06401	PF3D7_0105800	136	S	___1	DS(0.5)S(0.5)YIRNENK	3	RSIVNNTIKNKTRDSSYIRNENKSCYIGDKN	MAL1P1.48;PFA0285c
PF3D7_0624600	ISWI	SNF2 helicase, putative	No	0.365197	-2.41998	-2.05478	-2.49111	-2.34884	-1.98667	-2.12289	PF3D7_0624600	1243	S	___1	LVVQTQDDEDMLDNFEEKLS(0.5)S(0.5)DEIRK	20	TQDDEDMLDNFEEKLSSDEIRKLMLHGKAAI	2270.t00132;MAL6P1.183;PFF1185w
PF3D7_0624600	ISWI	SNF2 helicase, putative	No	0.365197	-2.41998	-2.05478	-2.49111	-2.34884	-1.98667	-2.12289	PF3D7_0624600	1244	S	___1	LVVQTQDDEDMLDNFEEKLS(0.5)S(0.5)DEIRK	21	QDDEDMLDNFEEKLSSDEIRKLMLHGKAAIQ	2270.t00132;MAL6P1.183;PFF1185w
PF3D7_1241900		tetratricopeptide repeat protein, putative	No	0.364979	-0.395493	-0.0305138	-0.391649	-0.399336	0.0186214	-0.079649	PF3D7_1241900	362	T	___1	TQNEYPVEEHT(1)S(1)NEVEKNK	11	ECVNKTQNEYPVEEHTSNEVEKNKKDIDSTN	2277.t00403;MAL12P1.401;PFL2015w
PF3D7_1224500	ASF1	histone chaperone ASF1, putative	No	0.364867	2.43719	2.80206	2.46082	2.41356	2.77566	2.82845	PF3D7_1224500	248	S	___1	NNELS(1)S(1)DLDKCEIFNANINGISR	6	NNFNQNNFLKNNELSSDLDKCEIFNANINGI	2277.t00236;MAL12P1.236;PFL1180w
PF3D7_0906600		zinc finger protein, putative	No	0.364778	2.16881	2.53359	2.21172	2.12589	2.51887	2.5483	PF3D7_0906600	744	S	___1	ESS(1)NNEDMLNNK	3	DDINNNTAPSTGRESSNNEDMLNNKMVMNND	PFI0325c
PF3D7_0727400		proteasome subunit alpha type-5, putative	No	0.364477	-2.47371	-2.10923	-2.57021	-2.37721	-2.01894	-2.19953	PF3D7_0727400	55	S	___1	RIS(0.751)S(0.102)T(0.146)LIEK	3	ICVNDGVILASERRISSTLIEKDSVEKLLSI	PF07_0112
PF3D7_0728000	eIF2alpha	eukaryotic translation initiation factor 2 subunit alpha, putative	No	0.364283	0.370118	0.734401	0.393631	0.346605	0.695261	0.77354	PF3D7_0728000	59	S	___1	IEDMGAYVSILEYNDMEGMILMS(0.5)ELS(0.5)KRR	26	LEYNDMEGMILMSELSKRRFRSVNKLIRVGR	PF07_0117
PF3D7_0424500	FIKK4.1	serine/threonine protein kinase, FIKK family	Yes	0.364007	3.09401	3.45802	3.16516	3.02286	3.47103	3.445	PF3D7_0424500	265	S	___1	DWTLNTIPDIGYS(1)QNNRR	13	SYKDWTLNTIPDIGYSQNNRRSQEVFKTEVK	MAL4P1.228;PFD1165w
PF3D7_1324600		conserved Plasmodium protein, unknown function	No	0.363953	-2.38053	-2.01657	-2.33285	-2.42821	-2.03469	-1.99846	PF3D7_1324600	1355	S	___1	RDINS(1)EHDQR	5	MVKRYIRRNRKRDINSEHDQRDGSKNKVEMK	PF13_0139
PF3D7_1027800	RPL3	60S ribosomal protein L3	No	0.363803	1.38595	1.74976	1.32976	1.44214	1.72066	1.77885	PF3D7_1027800	293	T	___1	TDKNS(0.003)AS(0.12)T(0.877)DADITEKK	8	KIYRIGLKTDKNSASTDADITEKKITPMGGF	PF10_0272
PF3D7_0918900	gammaGCS	gamma-glutamylcysteine synthetase	No	0.363624	-0.652818	-0.289194	-0.76211	-0.543526	-0.177769	-0.40062	PF3D7_0918900	338	S	___1	KT(0.019)DS(0.981)LFECEVFKPEQTNK	4	SNTQDIFISSLKKTDSLFECEVFKPEQTNKY	PFI0925w
PF3D7_1139300	ApiAP2	AP2 domain transcription factor, putative	No	0.363192	2.06819	2.43139	2.14157	1.99482	2.4631	2.39967	PF3D7_1139300	1669	S	___1	VYS(0.021)S(0.979)DCEK	4	NDYTNDDNHSSKVYSSDCEKNTNHNKKTEDK	PF11_0404
PF3D7_1449500	ApiAP2	AP2 domain transcription factor, putative	No	0.363013	-2.99465	-2.63163	-3.21629	-2.77301	-2.76985	-2.49342	PF3D7_1449500	31	S	___3	NT(0.019)S(0.02)YEKAS(0.96)EIVES(0.562)DMY(0.532)ES(0.886)NEDS(0.018)NT(0.003)K	8	ENDSHLVKNTSYEKASEIVESDMYESNEDSN	PF14_0471
PF3D7_1449500	ApiAP2	AP2 domain transcription factor, putative	No	0.363013	-2.99465	-2.63163	-3.21629	-2.77301	-2.76985	-2.49342	PF3D7_1449500	36	S	___3	ASEIVES(1)DMYESNEDSNTK	7	LVKNTSYEKASEIVESDMYESNEDSNTKNKG	PF14_0471
PF3D7_1449500	ApiAP2	AP2 domain transcription factor, putative	No	0.363013	-2.99465	-2.63163	-3.21629	-2.77301	-2.76985	-2.49342	PF3D7_1449500	41	S	___3	ASEIVESDMYES(1)NEDSNTK	12	SYEKASEIVESDMYESNEDSNTKNKGVWYNA	PF14_0471
PF3D7_1449500	ApiAP2	AP2 domain transcription factor, putative	No	0.363013	-2.99465	-2.63163	-3.21629	-2.77301	-2.76985	-2.49342	PF3D7_1449500	39	Y	___3	ASEIVES(0.036)DMY(0.977)ES(0.984)NEDS(0.003)NTK	10	NTSYEKASEIVESDMYESNEDSNTKNKGVWY	PF14_0471
PF3D7_1139300	ApiAP2	AP2 domain transcription factor, putative	No	0.362713	3.15125	3.51397	3.33806	2.96445	3.50596	3.52197	PF3D7_1139300	1800	S	___1	S(1)NEKLENILDGGVNMR	1	SFDKCSNENSVCINKSNEKLENILDGGVNMR	PF11_0404
PF3D7_1214900		conserved Plasmodium membrane protein, unknown function	No	0.362348	-0.297192	0.065156	-0.314669	-0.279715	0.0686111	0.0617008	PF3D7_1214900	239	T	___1	QQSEAYKIENVT(1)EFDDEV	12	EVFRQQSEAYKIENVTEFDDEV_________	2277.t00145;MAL12P1.144;PFL0720w
PF3D7_0501200	PIESP2	parasite-infected erythrocyte surface protein	Yes	0.362179	-2.18362	-1.82144	-2.17053	-2.1967	-1.93362	-1.70926	PF3D7_0501200	274	S	___1	T(0.009)LILGS(0.991)FPQAGEILREDLWNKEDNK	6	PEKEIRQESRTLILGSFPQAGEILREDLWNK	MAL5P1.13;PFE0060w
PF3D7_0617200		conserved Plasmodium protein, unknown function	No	0.361923	1.12451	1.48643	1.24481	1.00421	1.45674	1.51612	PF3D7_0617200	23	S	___1	LGS(1)ISQSIDEIKK	3	KIEKPDFDAYNEKLGSISQSIDEIKKKIDNL	2270.t00061;MAL6P1.254;PFF0835w
PF3D7_0904600		ubiquitin specific protease, putative	No	0.361748	0.778933	1.14068	0.62479	0.933075	1.28028	1.00108	PF3D7_0904600	1033	S	___1	S(0.003)Y(0.001)NS(0.942)S(0.027)S(0.027)NKK	4	SANEMNINNFNKSYNSSSNKKNSIPCNSSNG	PFI0225w
PF3D7_0904800	RPA1	replication protein A1, small fragment	No	0.361668	-1.4042	-1.04253	-1.61994	-1.18847	-1.01797	-1.0671	PF3D7_0904800	476	T	___1	RS(0.242)LNDDT(0.729)NDS(0.029)K	7	NNDNSHRAKRSLNDDTNDSKKQKL_______	PFI0235w
PF3D7_0823200		RNA-binding protein, putative	No	0.361412	0.693058	1.05447	0.704571	0.681545	1.1213	0.98764	PF3D7_0823200	45	S	___1	YGTITQVYYVPAT(0.265)AQS(0.735)PR	16	YGTITQVYYVPATAQSPRGWAFITYEQRSEA	MAL8P1.40
PF3D7_0501400	FIRA	interspersed repeat antigen	Yes	0.361138	0.0101929	0.371331	0.19482	-0.174435	0.386992	0.355671	PF3D7_0501400	414	S	___2	KGS(1)EGDNIS(1)LS(0.944)S(0.055)LS(0.001)EETQEK	3	QEPVTVEEHIDEKKGSEGDNISLSSLSEETQ	MAL5P1.15;PFE0070w
PF3D7_1139300	ApiAP2	AP2 domain transcription factor, putative	No	0.361097	4.86592	5.22702	4.97959	4.75225	5.31027	5.14377	PF3D7_1139300	1972	S	___1	TSS(1)NIYDYFLDK	3	SSGLYYSFNVKGKTSSNIYDYFLDKKEHDYF	PF11_0404
PF3D7_0801800		mannose-6-phosphate isomerase, putative	No	0.360957	-1.26105	-0.900089	-1.2518	-1.27029	-0.850279	-0.9499	PF3D7_0801800	606	T	___1	T(1)IS(1)DDGVVDSYDVSKK	1	ESDMDEVDEDEKDEKTISDDGVVDSYDVSKK	MAL8P1.156
PF3D7_0606000	KIC1	conserved Plasmodium protein, unknown function	No	0.360623	-2.41966	-2.05903	-2.46879	-2.37053	-2.16641	-1.95166	PF3D7_0606000	528	S	___2	NNS(0.971)IY(0.029)DNICDS(0.999)FKR	3	NMNDLYINKKGDRNNSIYDNICDSFKRQESV	2270.t00255;MAL6P1.63;PFF0295c
PF3D7_0606000	KIC1	conserved Plasmodium protein, unknown function	No	0.360623	-2.41966	-2.05903	-2.46879	-2.37053	-2.16641	-1.95166	PF3D7_0606000	536	S	___2	NNSIYDNICDS(1)FKR	11	KKGDRNNSIYDNICDSFKRQESVSKSLLFSD	2270.t00255;MAL6P1.63;PFF0295c
PF3D7_1326700		conserved Apicomplexan protein, unknown function	No	0.360467	2.90055	3.26102	2.92546	2.87564	3.2344	3.28764	PF3D7_1326700	222	S	___1	S(0.023)T(0.004)S(0.974)DLLNDLTNK	3	INSMNNVTHTNRKSTSDLLNDLTNKNNTNYI	MAL13P1.360
PF3D7_1468100		conserved Plasmodium protein, unknown function	No	0.360283	-2.53553	-2.17525	-2.52478	-2.54629	-2.13594	-2.21456	PF3D7_1468100	2557	T	___1	YNKNNS(1)DDVNEDNKS(1)LEDAEEEDT(1)I	24	VNEDNKSLEDAEEEDTI______________	PF14_0649
PF3D7_1223400		phospholipid-transporting ATPase, putative	No	0.360217	-0.670802	-0.310585	-0.790659	-0.550945	-0.371679	-0.249491	PF3D7_1223400	875	S	___1	S(0.202)LS(0.163)NYS(0.633)DT(0.001)SYGDVHLK	6	DEKNYNDDQRSLSNYSDTSYGDVHLKNYKQN	2277.t00225;MAL12P1.225;PFL1125w
PF3D7_0111800		eukaryotic translation initiation factor 4E, putative	No	0.360073	-0.501698	-0.141624	-0.34606	-0.657335	0.0470314	-0.33028	PF3D7_0111800	89	S	___1	RNS(1)KNDNMEK	3	ENDSKVFKTYRNKRNSKNDNMEKHKNDVTKN	MAL1P2.43;PFA0570w
PF3D7_1139300	ApiAP2	AP2 domain transcription factor, putative	No	0.360033	1.54032	1.90036	1.59058	1.49006	1.91973	1.88098	PF3D7_1139300	618	S	___1	TDNS(1)PFNKQDEEFLLNSK	4	DIKVLNGIKRLKTDNSPFNKQDEEFLLNSKN	PF11_0404
PF3D7_0717500	CDPK4	calcium-dependent protein kinase 4	No	0.359902	-2.9804	-2.62049	-3.243	-2.7178	-2.60973	-2.63126	PF3D7_0717500	219	S	___1	IIDFGLS(0.844)T(0.156)HFEYSK	7	KNKEDMIIKIIDFGLSTHFEYSKKMKDKIGT	PF07_0072
PF3D7_1107300	PAIP1	polyadenylate-binding protein-interacting protein 1, putative	No	0.359571	-1.36921	-1.00963	-1.34625	-1.39216	-1.05393	-0.96534	PF3D7_1107300	1973	S	___1	NDHKDESSVHS(0.998)FNS(0.973)S(0.028)RLNK	14	KKNDHKDESSVHSFNSSRLNKKDNKNDARHK	PF11_0086
PF3D7_0914900		BSD-domain protein, putative	No	0.359192	1.49274	1.85193	1.50602	1.47945	1.86549	1.83837	PF3D7_0914900	570	S	___1	SACDLEEPKS(1)DFFDSSNIK	10	ISEANRSACDLEEPKSDFFDSSNIKKELNEM	PFI0730w
PF3D7_1466200	EGXP	conserved Plasmodium protein, unknown function	No	0.358938	-1.14494	-0.786004	-1.1893	-1.10059	-0.919859	-0.652149	PF3D7_1466200	1326	S	___1	NIEEDLADLDEDS(0.79)T(0.21)ENINEPNHLDGQNNK	13	NFRNIEEDLADLDEDSTENINEPNHLDGQNN	PF14_0631
PF3D7_0922700	PRP18	pre-mRNA-splicing factor 18, putative	No	0.358418	-1.25782	-0.8994	-1.43476	-1.08088	-0.83078	-0.968019	PF3D7_0922700	146	S	___1	LKEDS(1)LDLIEDNIEDEIEK	5	QNIFGDVLRGRLKEDSLDLIEDNIEDEIEKG	PFI1115c
PF3D7_0305500		conserved Plasmodium protein, unknown function	No	0.358363	-0.785913	-0.427549	-0.76643	-0.805395	-0.352329	-0.502769	PF3D7_0305500	3702	S	___1	S(0.711)VHFY(0.289)PQHLDGNTLKK	1	ENNSVKIIDVDERKRSVHFYPQHLDGNTLKK	MAL3P2.18;PFC0245c
PF3D7_0628200	PK4	eukaryotic translation initiation factor 2-alpha kinase	No	0.358253	1.28777	1.64603	1.33062	1.24492	1.64227	1.64978	PF3D7_0628200	2345	S	___2	NFS(0.998)DS(0.002)IYKK	3	NPEKNHNPFLSDKNFSDSIYKKKKSHDYNSS	2270.t00170;MAL6P1.146;PFF1370w
PF3D7_0628200	PK4	eukaryotic translation initiation factor 2-alpha kinase	No	0.358253	1.28777	1.64603	1.33062	1.24492	1.64227	1.64978	PF3D7_0628200	2340	S	___2	NHNPFLS(1)DKNFS(0.89)DS(0.11)IYK	7	SKNKENPEKNHNPFLSDKNFSDSIYKKKKSH	2270.t00170;MAL6P1.146;PFF1370w
PF3D7_1423700		conserved Plasmodium protein, unknown function	No	0.358187	-2.16636	-1.80817	-1.95905	-2.37366	-1.85157	-1.76477	PF3D7_1423700	1508	S	___1	FSTYSNNNNNNNNNNNNNNNNNNGS(0.934)VS(0.066)FK	25	NNNNNNNNNNNNNNGSVSFKTKDDKYKNSYN	PF14_0228
PF3D7_0418600		regulator of chromosome condensation, putative	No	0.358083	-1.3326	-0.974515	-1.22566	-1.43954	-1.0016	-0.94743	PF3D7_0418600	925	S	___1	LY(0.003)FS(0.994)DACS(0.002)S(0.002)NEKK	4	HKNHETDEGSNRLYFSDACSSNEKKKSKKQN	MAL4P1.175;PFD0900w
PF3D7_1345400		conserved Plasmodium protein, unknown function	No	0.357843	1.61226	1.97011	1.72924	1.49529	1.97547	1.96474	PF3D7_1345400	1395	S	___3	FHQNLS(1)DVT(1)VT(1)EEEKLDEYEK	6	IVIKKKRKIRFHQNLSDVTVTEEEKLDEYEK	MAL13P1.226
PF3D7_1345400		conserved Plasmodium protein, unknown function	No	0.357843	1.61226	1.97011	1.72924	1.49529	1.97547	1.96474	PF3D7_1345400	1398	T	___3	FHQNLS(1)DVT(1)VT(1)EEEKLDEYEK	9	KKKRKIRFHQNLSDVTVTEEEKLDEYEKTKK	MAL13P1.226
PF3D7_1345400		conserved Plasmodium protein, unknown function	No	0.357843	1.61226	1.97011	1.72924	1.49529	1.97547	1.96474	PF3D7_1345400	1400	T	___3	FHQNLS(1)DVT(1)VT(1)EEEKLDEYEK	11	KRKIRFHQNLSDVTVTEEEKLDEYEKTKKKQ	MAL13P1.226
PF3D7_0500800	MESA	mature parasite-infected erythrocyte surface antigen	Yes	0.357773	5.60119	5.95896	5.65395	5.54843	5.96349	5.95443	PF3D7_0500800	448	T	___1	NIET(1)DDEEET(1)LVVKDDAK	4	FQMLGCNFLCNKNIETDDEEETLVVKDDAKK	MAL5P1.9;PFE0040c
PF3D7_0711400	SAP18	histone deacetylase complex subunit SAP18, putative	No	0.357733	-1.08245	-0.724714	-0.9571	-1.20779	-0.641489	-0.80794	PF3D7_0711400	380	S	___1	NEKHEDT(0.158)S(0.842)KDFFYNK	8	KEKKRTWKNEKHEDTSKDFFYNKEKTHSLEG	MAL7P1.37
PF3D7_0702500		Plasmodium exported protein, unknown function	Yes	0.357148	0.250168	0.607316	0.106071	0.394264	0.620241	0.594391	PF3D7_0702500	66	S	___1	S(0.033)S(0.005)S(0.914)VT(0.047)K	3	RSYKKRKGMRILKSSSVTKGRLYRGTVFDED	PF07_0008
PF3D7_1466200	EGXP	conserved Plasmodium protein, unknown function	No	0.357058	-3.1751	-2.81804	-3.3789	-2.9713	-2.93277	-2.70332	PF3D7_1466200	1327	T	___1	NIEEDLADLDEDS(0.5)T(0.5)ENINEPNHLDGQNNK	14	FRNIEEDLADLDEDSTENINEPNHLDGQNNK	PF14_0631
PF3D7_1421800		conserved Plasmodium protein, unknown function	No	0.356914	0.571902	0.928816	0.640141	0.503664	0.900381	0.957251	PF3D7_1421800	119	S	___1	KDIEFHTLYES(1)DEKNNMVSR	11	CDGRKKDIEFHTLYESDEKNNMVSRRSSVES	PF14_0210
PF3D7_1346300	ALBA2	DNA/RNA-binding protein Alba 2	No	0.356749	4.14444	4.50119	4.24593	4.04294	4.51299	4.48938	PF3D7_1346300	5	T	___2	PGS(1)T(1)KS(0.996)DT(0.004)KLENEIR	4	___________MPGSTKSDTKLENEIRISYK	MAL13P1.233
PF3D7_1317000	USP39	U4/U6.U5 tri-snRNP-associated protein 2, putative	No	0.356712	3.32788	3.68459	3.40294	3.25282	3.69473	3.67445	PF3D7_1317000	413	S	___2	FNES(1)DNDS(1)KDYLK	4	GNEESQENMELKFNESDNDSKDYLKNINEEE	PF13_0096
PF3D7_1317000	USP39	U4/U6.U5 tri-snRNP-associated protein 2, putative	No	0.356712	3.32788	3.68459	3.40294	3.25282	3.69473	3.67445	PF3D7_1317000	417	S	___2	FNES(1)DNDS(1)KDYLK	8	SQENMELKFNESDNDSKDYLKNINEEEVEEE	PF13_0096
PF3D7_0801800		mannose-6-phosphate isomerase, putative	No	0.356558	-1.72683	-1.37027	-1.68211	-1.77155	-1.27747	-1.46307	PF3D7_0801800	715	Y	___1	VCEKECATGCS(0.006)NEY(0.786)T(0.208)NVYDNLNK	14	TKVCEKECATGCSNEYTNVYDNLNKQNDPYF	MAL8P1.156
PF3D7_1332900	cyto-IRS	isoleucine--tRNA ligase, putative	No	0.356423	2.96226	3.31869	3.02026	2.90426	3.30444	3.33293	PF3D7_1332900	346	S	___1	HADEDIYS(1)DHINVNK	8	KCDTSNEKHADEDIYSDHINVNKNNNKNNNS	PF13_0179
PF3D7_0607000		translation initiation factor IF-2, putative	No	0.356382	-0.628167	-0.271785	-0.522499	-0.733835	-0.297909	-0.245661	PF3D7_0607000	234	S	___1	EKS(0.5)KS(0.5)EYINLDINK	3	KQLKESGMLIEPREKSKSEYINLDINKTKLL	2270.t00246;MAL6P1.73;PFF0345w
PF3D7_0607000		translation initiation factor IF-2, putative	No	0.356382	-0.628167	-0.271785	-0.522499	-0.733835	-0.297909	-0.245661	PF3D7_0607000	236	S	___1	EKS(0.5)KS(0.5)EYINLDINK	5	LKESGMLIEPREKSKSEYINLDINKTKLLLK	2270.t00246;MAL6P1.73;PFF0345w
PF3D7_0419900		phosphatidylinositol 4-kinase, putative	No	0.356343	-0.563128	-0.206784	-0.519119	-0.607136	-0.175009	-0.23856	PF3D7_0419900	2070	S	___1	IRS(1)FEK	3	YKMDNVDVISSHRIRSFEKESICLSDEHMVD	MAL4P1.188;PFD0965w
PF3D7_1426400		MORN repeat protein, putative	No	0.355762	2.57014	2.9259	2.71932	2.42096	2.9309	2.9209	PF3D7_1426400	2	S	___3	MS(1)RIIY(1)S(1)DEK	2	______________MSRIIYSDEKKTKGKYI	PF14_0243;PF14_0243b
PF3D7_1426400		MORN repeat protein, putative	No	0.355762	2.57014	2.9259	2.71932	2.42096	2.9309	2.9209	PF3D7_1426400	7	S	___3	MS(1)RIIY(1)S(1)DEK	7	_________MSRIIYSDEKKTKGKYIYANGN	PF14_0243;PF14_0243b
PF3D7_1426400		MORN repeat protein, putative	No	0.355762	2.57014	2.9259	2.71932	2.42096	2.9309	2.9209	PF3D7_1426400	6	Y	___3	MS(1)RIIY(1)S(1)DEK	6	__________MSRIIYSDEKKTKGKYIYANG	PF14_0243;PF14_0243b
PF3D7_1107300	PAIP1	polyadenylate-binding protein-interacting protein 1, putative	No	0.355474	-1.39062	-1.03515	-1.39941	-1.38184	-1.18172	-0.88858	PF3D7_1107300	3036	S	___1	KLS(1)LNLMK	3	GNMKNMDQNKNMKKLSLNLMKNKNNLQQSKM	PF11_0086
PF3D7_0815800	VPS9	vacuolar protein sorting-associated protein 9, putative	No	0.355272	1.9866	2.34188	2.05703	1.91618	2.33912	2.34463	PF3D7_0815800	406	S	___1	NYS(1)DSCNHMINHISSENIIK	3	NNNINNDMKETMKNYSDSCNHMINHISSENI	MAL8P1.82
PF3D7_0916400		conserved Plasmodium protein, unknown function	No	0.355098	0.474503	0.8296	0.454151	0.494854	0.831371	0.827829	PF3D7_0916400	1788	S	___1	T(0.025)IES(0.975)DDKNGK	4	HEHISNNNSLDKTIESDDKNGKIGILLTNIE	PFI0805w
PF3D7_0812500		RNA-binding protein, putative	No	0.355028	-0.809123	-0.454095	-0.58086	-1.03739	-0.344629	-0.56356	PF3D7_0812500	731	T	___1	KYS(0.071)NY(0.002)NT(0.903)Y(0.024)NNNDNYNNKDFK	7	YDKEYYNKRKYSNYNTYNNNDNYNNKDFKSY	PF08_0086
PF3D7_0606000	KIC1	conserved Plasmodium protein, unknown function	No	0.354958	1.07474	1.4297	1.13859	1.01089	1.42822	1.43117	PF3D7_0606000	473	S	___2	NTDVDKS(0.007)DES(0.993)PLS(1)EQNAEIDNHNVLINR	10	SEIYNRNTDVDKSDESPLSEQNAEIDNHNVL	2270.t00255;MAL6P1.63;PFF0295c
PF3D7_0718100	EST	exported serine/threonine protein kinase	Yes	0.354948	-0.388092	-0.033144	-0.308578	-0.467606	-0.0236988	-0.0425892	PF3D7_0718100	1126	S	___1	LEEDS(1)EEMER	5	THEHMVEKKVKLEEDSEEMERNTNNNKINYD	MAL7P1.91
PF3D7_0214400		conserved Plasmodium protein, unknown function	No	0.354757	1.99554	2.3503	2.02524	1.96584	2.32217	2.37842	PF3D7_0214400	194	S	___1	NKS(1)EQNFFEIQPNNEEEKELFK	3	HLKPISKNFIEIKNKSEQNFFEIQPNNEEEK	PF02_0135;PFB0655c
PF3D7_0827300		conserved Plasmodium protein, unknown function	No	0.354738	-0.925603	-0.570865	-0.86293	-0.988276	-0.600969	-0.54076	PF3D7_0827300	459	S	___1	INQEDKS(0.426)DIS(0.568)LS(0.003)T(0.003)CCMQSEK	10	EMETGRINQEDKSDISLSTCCMQSEKNKENE	PF08_0016
PF3D7_0500800	MESA	mature parasite-infected erythrocyte surface antigen	Yes	0.354662	1.82048	2.17515	1.82688	1.81409	2.19817	2.15212	PF3D7_0500800	1276	S	___1	NT(0.046)S(0.954)GLVHR	3	SEEESEEESDEEKNTSGLVHRRNCKKEKKYN	MAL5P1.9;PFE0040c
PF3D7_0708800	HSP110c	heat shock protein 110	No	0.354583	-0.191822	0.162761	-0.463789	0.0801449	0.186041	0.139481	PF3D7_0708800	455	S	___1	LYTRDS(1)LKK	6	NDASKSNVEKLYTRDSLKKKVKKIVIPEKGH	PF07_0033
PF3D7_0609700	KIC6	conserved Plasmodium protein, unknown function	No	0.354553	-1.59732	-1.24276	-1.6005	-1.59414	-1.27806	-1.20747	PF3D7_0609700	22	S	___1	KS(0.049)LNS(0.951)PHNNNNDNYNNNYTYDENSLVK	5	KNSFLLQSYFKKSLNSPHNNNNDNYNNNYTY	2270.t00217;MAL6P1.100;PFF0480w
PF3D7_0730900	PTP4	EMP1-trafficking protein	Yes	0.354444	-1.53632	-1.18187	-1.38624	-1.6864	-1.30284	-1.06091	PF3D7_0730900	1765	S	___1	LKS(1)DIGNFK	3	GKEKNNTQNETHKLKSDIGNFKNSLHKEEKN	MAL7P1.171
PF3D7_1328500		alpha/beta-hydrolase, putative	No	0.354237	-1.29704	-0.942805	-1.25732	-1.33677	-0.93272	-0.95289	PF3D7_1328500	259	S	___2	YT(0.002)S(0.045)T(0.284)S(0.836)S(0.833)LNKVNGNNNIECENLR	5	IEVKSEVNIPKYTSTSSLNKVNGNNNIECEN	PF13_0153
PF3D7_1328500		alpha/beta-hydrolase, putative	No	0.354237	-1.29704	-0.942805	-1.25732	-1.33677	-0.93272	-0.95289	PF3D7_1328500	260	S	___2	YT(0.002)S(0.045)T(0.284)S(0.836)S(0.833)LNKVNGNNNIECENLR	6	EVKSEVNIPKYTSTSSLNKVNGNNNIECENL	PF13_0153
PF3D7_0728000	eIF2alpha	eukaryotic translation initiation factor 2 subunit alpha, putative	No	0.353938	0.432782	0.78672	0.46126	0.404305	0.743391	0.83005	PF3D7_0728000	56	S	___1	IEDMGAYVSILEYNDMEGMILMS(0.536)ELS(0.464)KRR	23	VSILEYNDMEGMILMSELSKRRFRSVNKLIR	PF07_0117
PF3D7_1445400	CLK1	protein serine/threonine kinase-1	No	0.353892	-1.15839	-0.804495	-1.03308	-1.2837	-0.93755	-0.67144	PF3D7_1445400	266	Y	___2	DIY(0.631)QPS(0.326)S(0.203)S(0.84)LHKYK	3	KSISRWEDNYTYKDIYQPSSSLHKYKRRSNF	PF14_0431
PF3D7_0103300		conserved Plasmodium protein, unknown function	No	0.353857	-1.78625	-1.43239	-1.75291	-1.8196	-1.49441	-1.37038	PF3D7_0103300	472	S	___1	SEEYEES(0.416)S(0.583)VKGDT(0.001)K	8	SLLKVKVKSEEYEESSVKGDTKDHFNYLNMF	MAL1P1.74;PFA0165c
PF3D7_1201100		RESA-like protein with PHIST and DnaJ domains	Yes	0.353717	-1.18668	-0.83296	-1.14076	-1.2326	-0.868299	-0.797621	PF3D7_1201100	462	S	___1	S(0.542)ES(0.45)EKS(0.008)LDISK	1	NNSKYVFDYGSFEEKSESEKSLDISKNFIFS	2277.t00011;MAL12P1.11;PFL0055c
PF3D7_0606000	KIC1	conserved Plasmodium protein, unknown function	No	0.353513	1.13078	1.4843	1.2151	1.04646	1.48351	1.48508	PF3D7_0606000	476	S	___2	NTDVDKS(0.007)DES(0.993)PLS(1)EQNAEIDNHNVLINR	13	YNRNTDVDKSDESPLSEQNAEIDNHNVLINR	2270.t00255;MAL6P1.63;PFF0295c
PF3D7_1107300	PAIP1	polyadenylate-binding protein-interacting protein 1, putative	No	0.353468	0.822078	1.17555	0.88884	0.755316	1.24824	1.10285	PF3D7_1107300	1075	T	___1	REGYNS(0.032)EDNDNT(0.937)AGNY(0.026)Y(0.005)LK	12	KGVKREGYNSEDNDNTAGNYYLKNGNPIMNV	PF11_0086
PF3D7_1242700		40S ribosomal protein S17, putative	No	0.353427	0.660488	1.01392	0.757961	0.563015	0.99225	1.03558	PF3D7_1242700	89	S	___1	RLDFVPEKS(1)QIDVSVIYVEPDTLR	9	QEEERERRLDFVPEKSQIDVSVIYVEPDTLR	2277.t00411;MAL12P1.409;PFL2055w
PF3D7_0702500		Plasmodium exported protein, unknown function	Yes	0.353308	-0.793933	-0.440625	-0.71175	-0.876116	-0.45842	-0.422831	PF3D7_0702500	124	S	___1	NGFDLNDDTT(0.004)NS(0.004)NNLGEGT(0.222)HS(0.769)AVHNLDGQK	21	NDDTTNSNNLGEGTHSAVHNLDGQKESQLYK	PF07_0008
PF3D7_0627800	ACS	acetyl-CoA synthetase, putative	No	0.352828	1.54763	1.90046	1.55648	1.53878	1.91623	1.88469	PF3D7_0627800	456	S	___1	ISYSEKS(0.999)YS(0.001)K	7	TKNNPINHKISYSEKSYSKELINTDMVNNDN	2270.t00165;MAL6P1.150;PFF1350c
PF3D7_1471400		diacylglycerol kinase, putative	No	0.352392	-0.306911	0.0454807	-0.0866985	-0.527124	0.0468006	0.0441608	PF3D7_1471400	83	S	___1	S(0.003)FS(0.996)MT(0.002)NDKITCGNEK	3	ESKGFSASSLNNKSFSMTNDKITCGNEKKEM	PF14_0681
PF3D7_0923400		conserved Plasmodium protein, unknown function	No	0.352273	1.6854	2.03768	1.67795	1.69286	1.94032	2.13503	PF3D7_0923400	77	S	___2	TQS(0.005)YRS(0.995)YEYK	6	IYEDNYSRGKTQSYRSYEYKLEHIMKKKEEY	PFI1150w
PF3D7_1107800	ApiAP2	AP2 domain transcription factor, putative	No	0.351627	1.3621	1.71373	1.44666	1.27753	1.62498	1.80247	PF3D7_1107800	1363	S	___2	VS(0.005)MNDS(0.996)ELS(1)LNNHDNNNDVIINNNMHGGK	6	YDYNTDYNSKVSMNDSELSLNNHDNNNDVII	PF11_0091
PF3D7_1107800	ApiAP2	AP2 domain transcription factor, putative	No	0.351627	1.3621	1.71373	1.44666	1.27753	1.62498	1.80247	PF3D7_1107800	1366	S	___2	VS(0.01)MNDS(0.99)ELS(1)LNNHDNNNDVIINNNMHGGK	9	NTDYNSKVSMNDSELSLNNHDNNNDVIINNN	PF11_0091
PF3D7_1141400	PIGH	phosphatidylinositol N-acetylglucosaminyltransferase subunit H, putative	No	0.351583	-0.672942	-0.32136	-0.70677	-0.639114	-0.27713	-0.365589	PF3D7_1141400	319	S	___1	LLNFS(0.078)S(0.887)Y(0.036)ENIK	6	CSSSEENIFKLLNFSSYENIKINKRSKKLRK	PF11_0425
PF3D7_0918900	gammaGCS	gamma-glutamylcysteine synthetase	No	0.351377	0.258927	0.610305	0.22633	0.291525	0.63571	0.5849	PF3D7_0918900	309	T	___2	NKEKDNT(1)PR	7	VYDDEIENKNKEKDNTPRSCNDYNNVNDSSN	PFI0925w
PF3D7_0619400		cell division cycle protein 48 homologue, putative	No	0.351377	-0.205643	0.145735	-0.27071	-0.140575	0.10623	0.18524	PF3D7_0619400	773	S	___1	S(0.993)VS(0.007)QADLIK	1	ITRHHFKEGLAGARRSVSQADLIKYDNFRIK	2270.t00082;MAL6P1.232;PFF0940c
PF3D7_0401800	PfD80	Plasmodium exported protein (PHISTb), unknown function	Yes	0.351333	3.30211	3.65344	3.41901	3.18521	3.55683	3.75005	PF3D7_0401800	62	S	___2	SS(0.001)S(0.998)CS(0.001)S(0.001)LASTTK	3	NLSEEKAEDDYKKSSSCSSLASTTKRSPSTA	MAL4P1.16;PFD0080c
PF3D7_1142100		conserved Plasmodium protein, unknown function	No	0.351263	-0.288287	0.0629759	-0.16613	-0.410444	0.093111	0.0328407	PF3D7_1142100	494	T	___2	ENNCEY(0.001)T(0.995)DVDET(0.014)S(0.013)NVFNNLS(0.977)DNYIK	7	YANEFSHVKENNCEYTDVDETSNVFNNLSDN	PF11_0433
PF3D7_0504700	CEP120	centrosomal protein CEP120, putative	No	0.351102	-2.46157	-2.11047	-2.29604	-2.6271	-2.18853	-2.0324	PF3D7_0504700	513	S	___2	S(1)IS(1)PEQVEDQQNDIIDKIK	1	EINESERYLTFQTSRSISPEQVEDQQNDIID	MAL5P1.47;PFE0230w
PF3D7_0504700	CEP120	centrosomal protein CEP120, putative	No	0.351102	-2.46157	-2.11047	-2.29604	-2.6271	-2.18853	-2.0324	PF3D7_0504700	515	S	___2	S(1)IS(1)PEQVEDQQNDIIDKIK	3	NESERYLTFQTSRSISPEQVEDQQNDIIDKI	MAL5P1.47;PFE0230w
PF3D7_1408200	ApiAP2	AP2 domain transcription factor AP2-G2, putative	No	0.351089	-0.361953	-0.0108643	-0.37459	-0.349316	-0.0446892	0.0229607	PF3D7_1408200	45	S	___1	NLCENNS(1)DIVEK	7	DIESNDDKKNLCENNSDIVEKMKGNYEYKDD	PF14_0079
PF3D7_1022400	SRSF4	serine/arginine-rich splicing factor 4	No	0.351028	-0.0944529	0.256576	-0.17507	-0.0138359	0.161871	0.35128	PF3D7_1022400	415	S	___1	SNDRLS(1)ESK	6	SSRELKSQDKSNDRLSESKKSYKSQSASVRY	PF10_0217
PF3D7_0702400	SEMP1	small exported membrane protein 1	Yes	0.350988	1.39359	1.74458	1.38859	1.39858	1.68909	1.80006	PF3D7_0702400	2	S	___1	S(1)QPQKQQNEEGAATAANTQEK	1	______________MSQPQKQQNEEGAATAA	PF07_0007
PF3D7_1468800	U2AF2	splicing factor U2AF large subunit, putative	No	0.350862	2.66172	3.01258	2.74924	2.57421	3.04154	2.98363	PF3D7_1468800	246	S	___1	TIEVHS(1)NS(1)EENKQEK	8	DRYLNKRKTIEVHSNSEENKQEKRRTKSRER	PF14_0656
PF3D7_0104800	NPT1	novel putative transporter 1, putative	No	0.350758	-3.6403	-3.28954	-3.47916	-3.80144	-3.33824	-3.24084	PF3D7_0104800	262	S	___1	S(0.545)RS(0.72)S(0.676)NNIY(0.017)T(0.042)NEEDEFHFK	4	NETTKHTNAEGRSRSSNNIYTNEEDEFHFKN	MAL1P1.40;PFA0245w
PF3D7_0708400	HSP90	heat shock protein 90	No	0.350528	-4.78591	-4.43538	-5.09079	-4.48104	-4.3567	-4.51407	PF3D7_0708400	733	T	___1	LGLS(0.002)IDEEENNDIDLPPLEET(0.916)VDAT(0.067)DS(0.014)K	21	DEEENNDIDLPPLEETVDATDSKMEEVD___	PF07_0029
PF3D7_1321700	SF1	splicing factor 1	No	0.350388	1.69737	2.04776	1.71462	1.68011	2.01355	2.08196	PF3D7_1321700	27	S	___2	EDKINGS(0.961)S(0.02)S(0.02)NKDELIENK	7	KLFEIKNSKEDKINGSSSNKDELIENKELKN	MAL13P1.120
PF3D7_1321700	SF1	splicing factor 1	No	0.350388	1.69737	2.04776	1.71462	1.68011	2.01355	2.08196	PF3D7_1321700	28	S	___2	EDKINGS(0.667)S(0.667)S(0.667)NKDELIENK	8	LFEIKNSKEDKINGSSSNKDELIENKELKND	MAL13P1.120
PF3D7_0506500		conserved Plasmodium protein, unknown function	No	0.350318	-2.37965	-2.02933	-2.48414	-2.27516	-2.07463	-1.98403	PF3D7_0506500	3740	S	___1	GS(1)MKGDEMVGSIK	2	KNNIKNEQLNGIYKGSMKGDEMVGSIKKPGR	MAL5P1.65;PFE0320w;PFE0325w
PF3D7_0520900	SAHH	adenosylhomocysteinase	No	0.350248	0.845442	1.19569	0.62896	1.06192	1.52083	0.87055	PF3D7_0520900	474	S	___1	S(0.998)NEY(0.002)RY	1	NQCQFLGVNKSGPFKSNEYRY__________	MAL5P1.210;PFE1050w
PF3D7_0517300	SR1	serine/arginine-rich splicing factor 1	No	0.350037	-2.41472	-2.06468	-2.43662	-2.39281	-1.9503	-2.17906	PF3D7_0517300	121	S	___1	YVVEVTGLPIS(0.5)GS(0.5)WQDLKDHLR	11	SRRGRYVVEVTGLPISGSWQDLKDHLREAGE	MAL5P1.173;PFE0865c
PF3D7_0517300	SR1	serine/arginine-rich splicing factor 1	No	0.350037	-2.41472	-2.06468	-2.43662	-2.39281	-1.9503	-2.17906	PF3D7_0517300	123	S	___1	YVVEVTGLPIS(0.5)GS(0.5)WQDLKDHLR	13	RGRYVVEVTGLPISGSWQDLKDHLREAGECG	MAL5P1.173;PFE0865c
PF3D7_1415600		conserved Plasmodium protein, unknown function	No	0.350008	-0.338472	0.0115356	-0.34454	-0.332405	-0.0386295	0.0617008	PF3D7_1415600	523	S	___2	Y(0.007)NS(0.993)EDS(0.923)IT(0.078)CEDDKHILK	3	IYKGVTCFDDILKYNSEDSITCEDDKHILKN	PF14_0154
PF3D7_1415600		conserved Plasmodium protein, unknown function	No	0.350008	-0.338472	0.0115356	-0.34454	-0.332405	-0.0386295	0.0617008	PF3D7_1415600	526	S	___2	Y(0.209)NS(0.792)EDS(0.995)IT(0.004)CEDDKHILK	6	GVTCFDDILKYNSEDSITCEDDKHILKNLNN	PF14_0154
PF3D7_0408500	FEN1	flap endonuclease 1	No	0.350007	-0.128157	0.22185	-0.0554485	-0.200865	0.15015	0.29355	PF3D7_0408500	606	S	___2	S(0.033)NS(0.23)PLKEDS(0.774)PNS(0.822)Y(0.141)NNIK	12	DTLKSNSPLKEDSPNSYNNIKNNNHTININS	MAL4P2.21;PFD0420c
PF3D7_1225200		conserved Plasmodium protein, unknown function	No	0.349723	-3.24814	-2.89841	-3.30088	-3.1954	-2.88688	-2.90995	PF3D7_1225200	784	S	___1	ES(1)IRHNSK	2	NKLEWNNNEHIQTKESIRHNSKSPNYYNNYN	2277.t00243;MAL12P1.243;PFL1215c
PF3D7_0102200	RESA	ring-infected erythrocyte surface antigen	Yes	0.349516	-2.53312	-2.18361	-2.50065	-2.56559	-2.37364	-1.99357	PF3D7_0102200	313	S	___1	HINELKS(1)LEHR	7	MNSDISSFKHINELKSLEHRAAKAAEAEMKK	MAL1P1.13;PFA0110w
PF3D7_0903700		alpha tubulin 1	No	0.349087	-0.249442	0.0996447	-0.452869	-0.0460148	0.12801	0.0712795	PF3D7_0903700	287	S	___1	AYHEQLS(0.965)VS(0.035)EITNSAFEPANMMAK	7	YAPVVSAEKAYHEQLSVSEITNSAFEPANMM	PFI0180w
PF3D7_0817300		conserved Plasmodium protein, unknown function	No	0.349068	-2.76875	-2.41968	-2.66192	-2.87559	-2.51669	-2.32268	PF3D7_0817300	131	Y	___2	SQDENFLHAEVS(0.722)S(0.514)NEY(0.764)K	16	SQDENFLHAEVSSNEYKDANNDSSDEEDDEY	PF08_0060
PF3D7_1033600	CEF1	myb2 transcription factor, putative	No	0.348963	-1.03169	-0.682725	-0.94257	-1.12081	-0.59988	-0.76557	PF3D7_1033600	517	S	___1	NIS(1)LYAHSIISYK	3	KNKIISDIKSFKKNISLYAHSIISYKNLKND	PF10_0327
PF3D7_1326700		conserved Apicomplexan protein, unknown function	No	0.348302	-0.319072	0.0292301	-0.170069	-0.468075	-0.00412941	0.0625896	PF3D7_1326700	193	S	___2	S(0.001)DIS(0.026)IS(0.816)S(0.157)EINK	6	LNRKSNTSQKSDISISSEINKSGSTSRININ	MAL13P1.360
PF3D7_1136600		conserved Plasmodium protein, unknown function	No	0.348268	-3.00539	-2.65712	-2.88838	-3.1224	-2.62481	-2.68943	PF3D7_1136600	1156	S	___1	KDVEDVFS(0.73)DLDIES(0.067)S(0.067)NNS(0.067)T(0.067)NQLDNK	8	NNNISKGKKDVEDVFSDLDIESSNNSTNQLD	PF11_0378
PF3D7_1212400		tetratricopeptide repeat protein, putative	No	0.348248	0.621067	0.969316	0.67462	0.567514	1.05222	0.88641	PF3D7_1212400	131	S	___1	NLNNNITDIKLS(1)DDDKETK	12	INKKNLNNNITDIKLSDDDKETKDDANEKYN	2277.t00124;MAL12P1.123;PFL0615w
PF3D7_1219000	FRM2	formin 2	No	0.348168	-0.319423	0.0287457	-0.30744	-0.331406	-0.0374794	0.0949707	PF3D7_1219000	1020	S	___1	VSS(0.001)VFS(0.999)PR	6	NFPLKNQIKKVSSVFSPRTINSNSSCKSISF	2277.t00185;MAL12P1.186;PFL0925w
PF3D7_0209100	PATPL1	phospholipase A2, putative	No	0.348037	0.933873	1.28191	0.966581	0.901165	1.27751	1.28631	PF3D7_0209100	36	S	___2	QVYS(0.983)GS(0.017)ETQNAENEYSK	4	DDEKDDSYEREKQVYSGSETQNAENEYSKLR	PF02_0087;PFB0410c
PF3D7_1004200		WD repeat-containing protein, putative	No	0.347803	-2.23372	-1.88591	-2.14913	-2.31831	-1.91277	-1.85906	PF3D7_1004200	2075	S	___1	SNYNNNDDDKNS(0.5)S(0.5)KEK	13	KSKSNYNNNDDDKNSSKEKNNTCIDMITNKD	PF10_0045
PF3D7_1004400		RNA-binding protein, putative	No	0.347782	-0.00421238	0.34357	0.0260601	-0.0344849	0.3556	0.331539	PF3D7_1004400	737	S	___2	TKDELYDDIS(1)EIKLQEGS(1)VCR	10	NEKKGKTKDELYDDISEIKLQEGSVCRSTKD	PF10_0047
PF3D7_1430300		acid phosphatase, putative	No	0.347768	2.34849	2.69626	2.52478	2.1722	2.67166	2.72086	PF3D7_1430300	2216	S	___1	NNINCVITTNNCYS(1)DREEK	14	DKNNINCVITTNNCYSDREEKGNFVSAEGVS	PF14_0282
PF3D7_1002200	PArt	tryptophan-rich antigen 3	No	0.347672	1.00256	1.35023	1.09886	0.906256	1.31035	1.39011	PF3D7_1002200	720	S	___1	RYS(1)ILTNR	3	KPRTFEKKIEKCRRYSILTNRENRTYLSNWN	PF10_0026
PF3D7_1445700		conserved Plasmodium protein, unknown function	No	0.347652	1.15434	1.502	1.12908	1.17961	1.39101	1.61298	PF3D7_1445700	350	S	___1	AFPS(0.003)LT(0.135)S(0.862)K	7	DPPNINDTRAFPSLTSK______________	PF14_0434
PF3D7_0515700	GAP40	glideosome-associated protein 40, putative	No	0.347593	-4.86736	-4.51976	-4.6352	-5.09951	-4.40059	-4.63894	PF3D7_0515700	420	S	___2	GTSHMDSSSNQTSHGVIS(1)ADEGRGEHSR	18	SHMDSSSNQTSHGVISADEGRGEHSRAATFK	MAL5P1.157;PFE0785c
PF3D7_1227700	KIC2	conserved Plasmodium protein, unknown function	No	0.347498	0.998628	1.34613	0.943771	1.05348	1.30746	1.38479	PF3D7_1227700	681	S	___1	NITIGS(1)LADTEK	6	VYTSKKSYDKNITIGSLADTEKRSIKIKNII	2277.t00268;MAL12P1.268;PFL1340c
PF3D7_1347200	NT1	nucleoside transporter 1	No	0.347458	-0.987157	-0.639699	-0.980509	-0.993805	-0.743189	-0.536209	PF3D7_1347200	16	S	___2	AYADIES(1)R	7	MSTGKESSKAYADIESRGDYKDDGKKGSTLS	PF13_0252
PF3D7_1142300		conserved Plasmodium membrane protein, unknown function	No	0.347447	-2.22162	-1.87417	-2.07958	-2.36366	-1.88126	-1.86708	PF3D7_1142300	916	S	___1	ET(0.007)MGNQS(0.993)MENNNK	7	SVCSENSLKETMGNQSMENNNKINNENNNDV	PF11_0435
PF3D7_0113000	GARP	glutamic acid-rich protein	Yes	0.347357	5.70683	6.05419	5.82209	5.59158	5.9776	6.13078	PF3D7_0113000	172	S	___1	KKEENSEVMS(1)LYK	10	KHKKDKKKEENSEVMSLYKTGQHKPKNATEH	MAL1P3.06;PFA0620c
PF3D7_0904600		ubiquitin specific protease, putative	No	0.347233	-3.94763	-3.60039	-3.66735	-4.22791	-3.59649	-3.6043	PF3D7_0904600	278	S	___2	NNNINSTVNYDNTNTEENIT(0.131)S(0.869)DHCNIKDDTR	21	STVNYDNTNTEENITSDHCNIKDDTRLEKDM	PFI0225w
PF3D7_1466800		conserved Plasmodium protein, unknown function	No	0.347183	-0.799067	-0.451884	-0.84598	-0.752155	-0.462219	-0.441549	PF3D7_1466800	867	S	___1	NPVNTSSNTNDS(0.001)T(0.002)NNES(0.819)S(0.178)YELTVK	17	PVNTSSNTNDSTNNESSYELTVKDLIYVTYS	PF14_0636
PF3D7_0529400		conserved Plasmodium protein, unknown function	No	0.347148	-2.26325	-1.9161	-2.23977	-2.28673	-1.98947	-1.84273	PF3D7_0529400;PF3D7_0529400.2-p1	1048;968	S	___1	HEDIPNIAS(0.988)CVVPLS(0.019)DES(0.992)LKES(0.001)LEK	18	DIPNIASCVVPLSDESLKESLEKSKESLSGG	MAL5P1.291;PF3D7_0529400.1;PF3D7_0529400.2;PFE1465w
PF3D7_0206300	AROM	pentafunctional AROM polypeptide, putative, pseudogene	No	0.347097	1.28265	1.62975	1.3339	1.2314	1.62485	1.63464	PF3D7_0206300	741	S	___1	TNIININENSIYLIDS(0.58)S(0.42)DKENDRPMSSK	16	TNIININENSIYLIDSSDKENDRPMSSKRKR	PF02_0059;PF02_0060;PF3D7_0206400;PFB0279w;PFB0280w
PF3D7_0803100	UTP14	U3 small nucleolar RNA-associated protein 14, putative	No	0.346932	-1.57969	-1.23276	-1.44166	-1.71773	-1.11915	-1.34637	PF3D7_0803100	883	S	___3	LS(0.794)DY(0.163)S(0.042)HKELS(0.001)K	2	KNDEESHILFSNNKLSDYSHKELSKAKKELK	PF08_0127
PF3D7_0803100	UTP14	U3 small nucleolar RNA-associated protein 14, putative	No	0.346932	-1.57969	-1.23276	-1.44166	-1.71773	-1.11915	-1.34637	PF3D7_0803100	886	S	___3	LS(0.027)DY(0.002)S(0.971)HKELSK	5	EESHILFSNNKLSDYSHKELSKAKKELKNDI	PF08_0127
PF3D7_0803100	UTP14	U3 small nucleolar RNA-associated protein 14, putative	No	0.346932	-1.57969	-1.23276	-1.44166	-1.71773	-1.11915	-1.34637	PF3D7_0803100	891	S	___3	NDEES(0.671)HILFS(0.717)NNKLS(0.717)DY(0.947)S(0.95)HKELS(0.997)K	23	LFSNNKLSDYSHKELSKAKKELKNDIDFVNS	PF08_0127
PF3D7_0803100	UTP14	U3 small nucleolar RNA-associated protein 14, putative	No	0.346932	-1.57969	-1.23276	-1.44166	-1.71773	-1.11915	-1.34637	PF3D7_0803100	878	S	___3	NDEES(0.671)HILFS(0.717)NNKLS(0.717)DY(0.947)S(0.95)HKELS(0.997)K	10	SDEIIKNDEESHILFSNNKLSDYSHKELSKA	PF08_0127
PF3D7_0803100	UTP14	U3 small nucleolar RNA-associated protein 14, putative	No	0.346932	-1.57969	-1.23276	-1.44166	-1.71773	-1.11915	-1.34637	PF3D7_0803100	885	Y	___3	NDEES(0.671)HILFS(0.717)NNKLS(0.717)DY(0.947)S(0.95)HKELS(0.997)K	17	DEESHILFSNNKLSDYSHKELSKAKKELKND	PF08_0127
PF3D7_1212700	EIF3A	eukaryotic translation initiation factor 3 subunit A, putative	No	0.346908	0.717288	1.0642	0.692591	0.741985	1.11131	1.01708	PF3D7_1212700	1050	S	___1	GGSQNGDDS(1)YRR	9	TWRRGDKGGSQNGDDSYRRHDDHHDGTHRDR	2277.t00126;MAL12P1.125;PFL0625c
PF3D7_1328500		alpha/beta-hydrolase, putative	No	0.346753	0.445698	0.792451	0.446321	0.445074	0.807571	0.77733	PF3D7_1328500	907	S	___1	ADYTQANLY(0.002)NS(0.995)EDY(0.003)SNQTCNK	11	QSYEKADYTQANLYNSEDYSNQTCNKFFENS	PF13_0153
PF3D7_1401500		esterase, putative	No	0.346437	-0.550297	-0.203859	-0.608599	-0.491995	-0.0388794	-0.368839	PF3D7_1401500	71	S	___1	QNVEVIS(1)NDKAILK	7	GHVRLQYLRQNVEVISNDKAILKDQDNYYVY	PF14_0017
PF3D7_1238500		conserved Plasmodium protein, unknown function	No	0.346416	0.203979	0.550395	0.283241	0.124716	0.57217	0.52862	PF3D7_1238500	966	S	___2	TISDNRS(0.999)DNMS(1)DYVQK	7	VDMSDNMARTISDNRSDNMSDYVQKETLKEE	2277.t00373;MAL12P1.371;PFL1865w
PF3D7_1238500		conserved Plasmodium protein, unknown function	No	0.346416	0.203979	0.550395	0.283241	0.124716	0.57217	0.52862	PF3D7_1238500	970	S	___2	TISDNRS(0.999)DNMS(1)DYVQK	11	DNMARTISDNRSDNMSDYVQKETLKEERRDI	2277.t00373;MAL12P1.371;PFL1865w
PF3D7_0603400	TEX1	trophozoite exported protein 1	No	0.346329	-0.568783	-0.222454	-0.49493	-0.642635	-0.264479	-0.180429	PF3D7_0603400	7	S	___1	RS(0.821)KNENDES(0.06)T(0.06)S(0.06)LPLENSELLIEYIHNLK	2	_________MSNKKRSKNENDESTSLPLENS	2270.t00281;MAL6P1.37;PFF0165c
PF3D7_1106800	pTKL	protein kinase, putative	Yes	0.346283	1.00404	1.35033	1.05929	0.948795	1.29754	1.40311	PF3D7_1106800	528	S	___1	GICS(0.986)DS(0.014)IFYK	4	NGEYYLINHLSKGICSDSIFYKSSQSKSSSQ	PF11_0079
PF3D7_1132600	PRP38A	pre-mRNA-splicing factor 38A, putative	No	0.346257	2.6769	3.02316	2.69599	2.65781	2.98819	3.05813	PF3D7_1132600	193	S	___1	ALLNIS(1)S(1)DNELFK	7	QRKNLEYYKALLNISSDNELFKNNEDTTHNK	PF11_0336
PF3D7_1445900	DDX5	ATP-dependent RNA helicase DDX5, putative	No	0.346192	-1.25351	-0.907314	-1.50344	-1.00357	-0.551949	-1.26268	PF3D7_1445900	88	T	___1	LS(0.244)T(0.756)KEVK	3	EKNFYKEHEDISKLSTKEVKEIRDKHKITIL	PF14_0436;PF14_0437
PF3D7_0923400		conserved Plasmodium protein, unknown function	No	0.346073	0.473773	0.819846	0.529041	0.418505	0.898401	0.741291	PF3D7_0923400	298	S	___1	EYIS(0.004)Y(0.016)ES(0.589)S(0.695)T(0.695)KR	8	KNYIMSRKEYISYESSTKRRRSNNNNVISHY	PFI1150w
PF3D7_1321700	SF1	splicing factor 1	No	0.345618	-3.98388	-3.63826	-4.04339	-3.92438	-3.80684	-3.46969	PF3D7_1321700	5	S	___1	MEENS(0.546)Y(0.454)FEAVEK	5	___________MEENSYFEAVEKLFEIKNSK	MAL13P1.120
PF3D7_1004400		RNA-binding protein, putative	No	0.345563	4.65703	5.00259	4.7717	4.54236	5.02646	4.97873	PF3D7_1004400	685	S	___1	GGDENIS(1)LK	7	TDIIDEKEKGGDENISLKNYKNKKENVDHDY	PF10_0047
PF3D7_1219600	ATPase2	aminophospholipid-transporting P-ATPase	No	0.345463	3.23543	3.5809	3.41597	3.0549	3.5315	3.63029	PF3D7_1219600	548	S	___1	EIPNIPKDDIS(1)S(1)DADVIK	12	GEQKEIPNIPKDDISSDADVIKRMRTKKIAD	2277.t00190;MAL12P1.190;PFL0950c
PF3D7_0303100		conserved Plasmodium protein, unknown function	No	0.345358	0.420833	0.766191	0.46833	0.373335	0.706741	0.82564	PF3D7_0303100	1119	S	___1	DDQNLKS(1)EGEEK	7	EEEIKNMDKDDQNLKSEGEEKNLLSPLSNNV	MAL3P1.11;PFC0145c
PF3D7_1334300	MSRP5	MSP7-like protein	Yes	0.345237	-1.9887	-1.64346	-1.9036	-2.0738	-1.56126	-1.72566	PF3D7_1334300	80	S	___1	RKS(0.994)DNT(0.006)LGK	3	IELLKKKVDDLEKRKSDNTLGKRQKKEDDDD	PF13_0191
PF3D7_1223100	PKAr	cAMP-dependent protein kinase regulatory subunit	No	0.345073	3.23456	3.57964	3.10992	3.35921	3.79503	3.36424	PF3D7_1223100	83	S	___1	TDS(1)EILDGLDYSEMSK	3	SKKPSKTKIPITKTDSEILDGLDYSEMSKQV	2277.t00222;MAL12P1.222;PFL1110c
PF3D7_1410400	RAP1	rhoptry-associated protein 1	No	0.345057	1.10563	1.45069	1.00302	1.20823	1.46136	1.44001	PF3D7_1410400	181	S	___1	RS(0.594)AS(0.406)VAGIVGADEEAPPAPK	2	ESNSSEESTTKSSKRSASVAGIVGADEEAPP	PF14_0102
PF3D7_1308200	cpsSII	carbamoyl phosphate synthetase	No	0.344443	-1.60816	-1.26372	-1.60907	-1.60726	-1.19871	-1.32873	PF3D7_1308200	1544	S	___1	QKS(0.938)IS(0.056)NKNPGNS(0.006)YYVVDSVYNNEYK	3	IGNNKNMDMYLSKQKSISNKNPGNSYYVVDS	PF13_0044
PF3D7_1366300		conserved Plasmodium protein, unknown function	No	0.344294	-0.713118	-0.368824	-0.66843	-0.757805	-0.340519	-0.397129	PF3D7_1366300	404	S	___2	HYRES(1)K	5	NDEISNNQEEKHYRESKNVSENIQEESITKE	MAL13P1.333;MAL13P1.334
PF3D7_1366300		conserved Plasmodium protein, unknown function	No	0.344294	-0.713118	-0.368824	-0.66843	-0.757805	-0.340519	-0.397129	PF3D7_1366300	408	S	___2	NVS(1)ENIQEESITK	3	SNNQEEKHYRESKNVSENIQEESITKEHISS	MAL13P1.333;MAL13P1.334
PF3D7_1243400		conserved Plasmodium protein, unknown function	No	0.344248	-2.40539	-2.06114	-2.5825	-2.22828	-2.05244	-2.06984	PF3D7_1243400	287	S	___1	NS(1)YQS(1)ICNNYTEHLNFK	2	DMMLKKYTHKKKKKNSYQSICNNYTEHLNFK	2277.t00417;MAL12P1.415;PFL2085w
PF3D7_1478600	PTP3	EMP1-trafficking protein	Yes	0.343483	2.82639	3.16987	2.77467	2.87811	3.08163	3.25811	PF3D7_1478600;PF3D7_1477000	1030;775	S	___1	GIDDEES(0.682)S(0.318)NKGK	7	NKIAKTVLKGIDDEESSNKGKNENKKKKKKD	PF14_0758
PF3D7_0603500	CAX	cation/H+ antiporter	No	0.343058	0.239303	0.58236	0.208941	0.269665	0.577761	0.58696	PF3D7_0603500	10	S	___1	AT(0.001)S(0.999)YVR	3	______MVMGRVRATSYVRRTISQPLNKNVP	2270.t00280;MAL6P1.38;PFF0170w
PF3D7_1224400		conserved Plasmodium protein, unknown function	No	0.342967	-0.341317	0.00164986	-0.145069	-0.537565	-0.0729694	0.0762691	PF3D7_1224400	198	S	___2	FHS(1)DDS(1)NEFNYVDEKEDENLIR	6	TYGNYLNEEKFHSDDSNEFNYVDEKEDENLI	2277.t00235;MAL12P1.235;PFL1175w
PF3D7_1225700		VAC14 domain-containing protein, putative	No	0.342802	-0.942212	-0.59941	-0.896229	-0.988195	-0.68512	-0.5137	PF3D7_1225700	786	S	___1	NES(0.91)S(0.09)IIK	3	LVNKHENISNKGRNESSIIKSKHDEDNENDY	2277.t00248;MAL12P1.248;PFL1240c
PF3D7_0507600	CAF40	cell differentiation protein, putative	No	0.342562	-1.31588	-0.97332	-1.28	-1.35176	-1.08689	-0.859751	PF3D7_0507600	566	S	___2	TDTHTNIHNINDNIENS(0.527)S(0.527)S(0.527)QS(0.42)FNNK	17	DTHTNIHNINDNIENSSSQSFNNKINDTNLK	MAL5P1.77;PFE0375w
PF3D7_0507600	CAF40	cell differentiation protein, putative	No	0.342562	-1.31588	-0.97332	-1.28	-1.35176	-1.08689	-0.859751	PF3D7_0507600	567	S	___2	TDTHTNIHNINDNIENS(0.527)S(0.527)S(0.527)QS(0.42)FNNK	18	THTNIHNINDNIENSSSQSFNNKINDTNLKC	MAL5P1.77;PFE0375w
PF3D7_0903500	NUP138	conserved Plasmodium protein, unknown function	No	0.342442	-0.678206	-0.335765	-0.657309	-0.699104	-0.357599	-0.313931	PF3D7_0903500	1109	T	___1	NIS(0.105)PT(0.799)Y(0.096)NQQLNK	5	LFLQGNFFNSKNISPTYNQQLNKDQDKMTKN	PFI0170w
PF3D7_0812500		RNA-binding protein, putative	No	0.341408	1.37407	1.71548	1.4343	1.31384	1.66088	1.77007	PF3D7_0812500	921	S	___1	NHDS(1)PYER	4	DKYDKKVKTNNKNHDSPYERNSVSISKDSYT	PF08_0086
PF3D7_1414500	ABCk2	atypical protein kinase, ABC-1 family, putative	No	0.341173	-1.41508	-1.0739	-1.47185	-1.3583	-1.13832	-1.00949	PF3D7_1414500	468	S	___1	SFSFVDY(0.005)S(0.027)LNQDVDS(0.938)DKMNQEDY(0.03)EY(0.001)ILK	15	KSFSFVDYSLNQDVDSDKMNQEDYEYILKEN	PF14_0143
PF3D7_0729100		conserved Plasmodium protein, unknown function	No	0.340472	-1.10365	-0.763175	-1.10008	-1.10722	-0.78418	-0.74217	PF3D7_0729100	1169	S	___1	YNEVEINGS(1)EKNNFVDNTK	9	DFNKKQKYNEVEINGSEKNNFVDNTKEMFEY	PF07_0120
PF3D7_0609700	KIC6	conserved Plasmodium protein, unknown function	No	0.340222	2.49441	2.83463	2.59882	2.39	2.75884	2.91042	PF3D7_0609700	1103	S	___2	Y(0.036)EKKS(0.964)DVS(1)DFTFNK	8	SNSVVNIKYEKKSDVSDFTFNKYKNVRDDEE	2270.t00217;MAL6P1.100;PFF0480w
PF3D7_0922500	PGK	phosphoglycerate kinase	No	0.339978	-2.04306	-1.70308	-2.20676	-1.87937	-1.89845	-1.50772	PF3D7_0922500	255	S	___1	IGT(0.173)S(0.823)LFDEAGS(0.004)K	4	AYTFKKVLNNMKIGTSLFDEAGSKIVGEIME	PFI1105w
PF3D7_1120000		conserved Plasmodium protein, unknown function	No	0.339852	-0.884168	-0.544315	-0.86623	-0.902105	-0.69656	-0.392071	PF3D7_1120000	1047	S	___1	NIS(1)DVS(1)DIEKNVPK	3	EEEIDELDDTEEKNISDVSDIEKNVPKNFIF	PF11_0207
PF3D7_0904100		AP-4 complex subunit epsilon, putative	No	0.339593	-2.75708	-2.41748	-2.91075	-2.6034	-2.39783	-2.43714	PF3D7_0904100	602	S	___1	NDDVNNS(1)DMQIDLQK	7	IKHEQKKNKNDDVNNSDMQIDLQKKKKNKMN	PFI0200c
PF3D7_1359900		conserved Plasmodium membrane protein, unknown function	No	0.339453	0.284018	0.62347	0.3668	0.201235	0.620241	0.626699	PF3D7_1359900	41	S	___1	DIS(0.991)KENILFLY(0.009)DK	3	TKSSNTTNFKKLRDISKENILFLYDKKVEHL	MAL13P1.298
PF3D7_1303500	NHE	sodium/hydrogen exchanger, Na+, H+ antiporter	No	0.339437	-1.82654	-1.4871	-1.96171	-1.69136	-1.59086	-1.38334	PF3D7_1303500	1337	S	___1	T(0.109)IS(0.891)VDALYNDDDKKK	3	IIKKNMKSNENIKTISVDALYNDDDKKKKIS	PF13_0019
PF3D7_0616900		conserved Plasmodium protein, unknown function	No	0.339387	2.81848	3.15787	2.90968	2.72729	3.15134	3.1644	PF3D7_0616900	580	S	___1	NKEYS(1)DDDLFSLSR	5	NNEPKEEEHVKNKEYSDDDLFSLSREKDKEL	2270.t00057;MAL6P1.257;PFF0820w
PF3D7_0614300	MFR1	major facilitator superfamily-related transporter, putative	No	0.338742	2.04025	2.37899	2.02154	2.05897	2.39744	2.36055	PF3D7_0614300	32	S	___2	KYEGEFLKS(1)NTTEMK	9	LRKNESKKYEGEFLKSNTTEMKGRKVVSKID	2270.t00033;MAL6P1.283;PFF0690c
PF3D7_0614300	MFR1	major facilitator superfamily-related transporter, putative	No	0.338742	2.04025	2.37899	2.02154	2.05897	2.39744	2.36055	PF3D7_0614300	35	T	___2	KY(0.001)EGEFLKS(0.871)NT(0.232)T(0.896)EMK	12	NESKKYEGEFLKSNTTEMKGRKVVSKIDENI	2270.t00033;MAL6P1.283;PFF0690c
PF3D7_0113000	GARP	glutamic acid-rich protein	Yes	0.338597	1.72118	2.05978	1.83804	1.60432	1.94251	2.17705	PF3D7_0113000	82	T	___1	DEKDDVPT(0.123)T(0.78)S(0.097)NDNLK	9	TLLKEEKDEKDDVPTTSNDNLKNAHNNNEIS	MAL1P3.06;PFA0620c
PF3D7_1438400	MCA2	metacaspase-like protein	No	0.338527	3.44974	3.78827	3.45612	3.44336	3.71567	3.86086	PF3D7_1438400	51	S	___2	ILVKES(1)ENDRNES(1)IQK	6	ANISCDSKGRILVKESENDRNESIQKKQMLS	PF14_0362;PF14_0363
PF3D7_1438400	MCA2	metacaspase-like protein	No	0.338527	3.44974	3.78827	3.45612	3.44336	3.71567	3.86086	PF3D7_1438400	58	S	___2	ILVKES(1)ENDRNES(1)IQK	13	KGRILVKESENDRNESIQKKQMLSSMDNRKT	PF14_0362;PF14_0363
PF3D7_1321700	SF1	splicing factor 1	No	0.338443	-3.11165	-2.77321	-3.35142	-2.87189	-2.79709	-2.74933	PF3D7_1321700	172	S	___3	ADT(1)LKEES(1)DVS(1)DNHHNNRK	8	HENIPKNKADTLKEESDVSDNHHNNRKSKNI	MAL13P1.120
PF3D7_1321700	SF1	splicing factor 1	No	0.338443	-3.11165	-2.77321	-3.35142	-2.87189	-2.79709	-2.74933	PF3D7_1321700	175	S	___3	ADT(1)LKEES(1)DVS(1)DNHHNNRK	11	IPKNKADTLKEESDVSDNHHNNRKSKNIKNS	MAL13P1.120
PF3D7_1321700	SF1	splicing factor 1	No	0.338443	-3.11165	-2.77321	-3.35142	-2.87189	-2.79709	-2.74933	PF3D7_1321700	167	T	___3	ADT(1)LKEES(1)DVS(1)DNHHNNRK	3	SDEDKHENIPKNKADTLKEESDVSDNHHNNR	MAL13P1.120
PF3D7_1346400		conserved Plasmodium protein, unknown function	No	0.338423	-2.10118	-1.76276	-2.15923	-2.04313	-1.74151	-1.78401	PF3D7_1346400	3544	S	___1	CDS(0.98)GS(0.02)VELEYK	3	TSEQMNSLNDFSRCDSGSVELEYKNMSVKSK	MAL13P1.234
PF3D7_0108300	ARP	conserved Plasmodium protein, unknown function	No	0.338278	-3.0899	-2.75162	-3.31687	-2.86294	-2.73089	-2.77236	PF3D7_0108300	1217	S	___2	GHT(0.003)VDS(0.997)ELT(0.001)TEDPVIQK	6	NNDNINNVARGHTVDSELTTEDPVIQKKGVC	MAL1P2.10;PFA0410w
PF3D7_0108300	ARP	conserved Plasmodium protein, unknown function	No	0.338278	-3.0899	-2.75162	-3.31687	-2.86294	-2.73089	-2.77236	PF3D7_0108300	1220	T	___2	GHT(0.228)VDS(0.756)ELT(0.877)T(0.139)EDPVIQK	9	NINNVARGHTVDSELTTEDPVIQKKGVCKDK	MAL1P2.10;PFA0410w
PF3D7_0302100	SRPK1	serine/threonine protein kinase	No	0.337712	-0.993962	-0.65625	-1.048	-0.939924	-0.6681	-0.6444	PF3D7_0302100	32	S	___2	LQYT(0.004)ES(0.996)DDEGSDEYCEGGYHPVK	6	SSSEDATSGKLQYTESDDEGSDEYCEGGYHP	MAL3P1.1;PFC0105w
PF3D7_0415900		60S ribosomal protein L15, putative	No	0.337573	-1.01118	-0.67361	-0.9893	-1.03307	-0.646059	-0.70116	PF3D7_0415900	109	S	___1	VGKS(1)ICGNLR	4	STRNLKSVAEGKVGKSICGNLRVLNSYWVGQ	MAL4P1.149;PFD0770c
PF3D7_1202500	TGS1	trimethylguanosine synthase, putative	No	0.337373	1.71876	2.05613	1.95174	1.48577	2.03207	2.08019	PF3D7_1202500	90	T	___1	NT(0.983)Y(0.009)RY(0.009)KMPVIFK	2	CRELHMLKSWELLKNTYRYKMPVIFKNLKDF	2277.t00025;MAL12P1.25;PFL0125c
PF3D7_0830500	TryThrA	sporozoite and liver stage tryptophan-rich protein, putative	Yes	0.337268	-0.311462	0.0258055	-0.371689	-0.251236	0.00292015	0.0486908	PF3D7_0830500	100	T	___2	ELADAET(0.003)T(0.997)DT(0.039)S(0.958)DS(0.003)EDEDHIINKK	8	ITAAIASKELADAETTDTSDSEDEDHIINKK	PF08_0003
PF3D7_1241200		conserved Plasmodium protein, unknown function	No	0.337148	-0.946322	-0.609175	-0.86104	-1.0316	-0.69611	-0.52224	PF3D7_1241200	2078	S	___1	ITNDTSEEKES(1)GNVQEDEEQLSCR	11	DNYIKITNDTSEEKESGNVQEDEEQLSCRNI	2277.t00396;MAL12P1.394;PFL1980c
PF3D7_1002100	PTP5	EMP1-trafficking protein	Yes	0.336772	1.98701	2.32378	1.96128	2.01274	2.37005	2.27751	PF3D7_1002100	508	S	___1	GSS(0.999)EGETS(0.001)SNEK	3	SKYTMNLDSPLLKGSSEGETSSNEKQEESNV	PF10_0025
PF3D7_0935900	REX1	ring-exported protein 1	Yes	0.336597	1.80434	2.14094	1.80728	1.8014	2.11778	2.1641	PF3D7_0935900	106	S	___1	MIEGNKS(1)GNGEEHNKHK	7	NEVNFEDKKMIEGNKSGNGEEHNKHKRRQVD	PFI1735c
PF3D7_0316600	FNT	formate-nitrite transporter	No	0.336578	-2.40072	-2.06414	-2.09692	-2.70452	-2.17266	-1.95563	PF3D7_0316600	17	S	___1	S(1)VCGGEESYIR	1	PPNNSKYVLDPVSIKSVCGGEESYIRCVEYG	MAL3P6.6;PFC0725c
PF3D7_1353200	MAHRP2	membrane associated histidine-rich protein	Yes	0.336533	-1.88078	-1.54425	-2.04161	-1.71996	-1.49058	-1.59792	PF3D7_1353200	133	T	___2	S(0.004)T(0.005)S(0.005)DS(0.277)S(0.277)T(0.29)S(0.428)T(0.715)QQTL	9	ASKEQSKSTSDSSTSTQQTL___________	PF13_0276
PF3D7_0401800	PfD80	Plasmodium exported protein (PHISTb), unknown function	Yes	0.336418	2.36523	2.70165	2.33217	2.39829	2.66069	2.74261	PF3D7_0401800	135	S	___2	S(1)AS(1)AASTTR	3	STASTASAASTTRSASAASTTRSASAASTTR	MAL4P1.16;PFD0080c
PF3D7_0617200		conserved Plasmodium protein, unknown function	No	0.336143	-1.80097	-1.46482	-1.77955	-1.82239	-1.52025	-1.4094	PF3D7_0617200	410	T	___1	DES(0.28)VKNVET(0.72)R	9	DMYEQKRDESVKNVETRREDLTNKIKEIDEK	2270.t00061;MAL6P1.254;PFF0835w
PF3D7_1447900	MDR2	multidrug resistance protein 2	No	0.335988	3.97627	4.31226	3.99995	3.95259	4.34768	4.27683	PF3D7_1447900	231	S	___1	NLLDMNIS(1)YNKLNEK	8	EYLNLDYKNLLDMNISYNKLNEKINNDIINN	PF14_0455
PF3D7_0714200		conserved Plasmodium protein, unknown function	No	0.335942	2.5305	2.86644	2.64223	2.41876	2.79944	2.93344	PF3D7_0714200	695	S	___2	S(0.001)IES(0.999)VAS(1)ENFEEWKK	4	QELNILKKRGSKSIESVASENFEEWKKNEEQ	PF07_0056
PF3D7_0714200		conserved Plasmodium protein, unknown function	No	0.335942	2.5305	2.86644	2.64223	2.41876	2.79944	2.93344	PF3D7_0714200	698	S	___2	S(0.001)IES(0.999)VAS(1)ENFEEWKK	7	NILKKRGSKSIESVASENFEEWKKNEEQYPT	PF07_0056
PF3D7_1107300	PAIP1	polyadenylate-binding protein-interacting protein 1, putative	No	0.335318	1.11971	1.45503	1.12479	1.11464	1.43968	1.47038	PF3D7_1107300	1967	S	___3	NDHKDES(0.066)S(0.934)VHS(0.962)FNS(0.033)S(0.005)R	8	YSKDSRKKNDHKDESSVHSFNSSRLNKKDNK	PF11_0086
PF3D7_1107300	PAIP1	polyadenylate-binding protein-interacting protein 1, putative	No	0.335318	1.11971	1.45503	1.12479	1.11464	1.43968	1.47038	PF3D7_1107300	1970	S	___3	DESSVHS(1)FNSSR	7	DSRKKNDHKDESSVHSFNSSRLNKKDNKNDA	PF11_0086
PF3D7_1107300	PAIP1	polyadenylate-binding protein-interacting protein 1, putative	No	0.335318	1.11971	1.45503	1.12479	1.11464	1.43968	1.47038	PF3D7_1107300	1973	S	___3	NDHKDESSVHS(0.998)FNS(0.973)S(0.028)RLNK	14	KKNDHKDESSVHSFNSSRLNKKDNKNDARHK	PF11_0086
PF3D7_1238500		conserved Plasmodium protein, unknown function	No	0.335177	-1.08202	-0.74684	-1.18246	-0.981575	-0.67767	-0.81601	PF3D7_1238500	721	S	___1	NNS(1)FVHDNNK	3	ILLNLNNEGSTNKNNSFVHDNNKINECDNNG	2277.t00373;MAL12P1.371;PFL1865w
PF3D7_0936800		Plasmodium exported protein (PHISTc), unknown function	Yes	0.335013	1.14802	1.48303	1.05847	1.23756	1.34903	1.61703	PF3D7_0936800	85	S	___1	NEEKS(1)LSDEINK	5	LRSHSTSDPKKNEEKSLSDEINKCDMKKYTA	PFI1780w
PF3D7_0730900	PTP4	EMP1-trafficking protein	Yes	0.334903	0.370513	0.705416	0.429811	0.311214	0.696081	0.71475	PF3D7_0730900	1198	S	___1	S(0.166)FS(0.166)S(0.668)QGIR	4	MKGQKYGSKNVRSFSSQGIRQDFPYKNENNH	MAL7P1.171
PF3D7_0905900	SEC27	coatomer subunit beta, putative	No	0.334892	0.0342731	0.369165	0.0120411	0.0565052	0.465731	0.2726	PF3D7_0905900	1004	S	___1	NINSYSINS(0.003)NQS(0.997)MDEELL	12	EDNKNINSYSINSNQSMDEELL_________	PFI0290c
PF3D7_0501400	FIRA	interspersed repeat antigen	Yes	0.334873	3.2701	3.60498	3.28731	3.2529	3.53118	3.67877	PF3D7_0501400	683	S	___1	ASEGDNIS(1)LS(0.629)S(0.365)LS(0.006)EETQEK	8	QEHADEKKASEGDNISLSSLSEETQEKSHTK	MAL5P1.15;PFE0070w
PF3D7_1368600	TIM9	mitochondrial import inner membrane translocase subunit TIM9, putative	No	0.334764	-0.902058	-0.567294	-0.83857	-0.965546	-0.601389	-0.533199	PF3D7_1368600	13	S	___1	SLDLSAFNKS(1)DRDK	10	___MEKSLDLSAFNKSDRDKILKKINKAEYE	PF13_0358
PF3D7_0401800	PfD80	Plasmodium exported protein (PHISTb), unknown function	Yes	0.334747	0.219823	0.55457	0.23871	0.200935	0.515991	0.593149	PF3D7_0401800	177	S	___3	SAST(0.002)AS(0.998)T(0.999)AS(0.999)AAS(0.001)AASTTR	9	STASTARSASTASTASAASAASTTRSASAAS	MAL4P1.16;PFD0080c
PF3D7_0525000		zinc finger protein, putative	No	0.334682	-0.234802	0.0998802	-0.1999	-0.269705	0.0263805	0.17338	PF3D7_0525000	658	S	___1	NQDNNMNDFKS(0.994)NENLQNAY(0.006)NK	11	IETTKNQDNNMNDFKSNENLQNAYNKLNNNS	MAL5P1.249;PFE1245w
PF3D7_0110600	PIP5K	phosphatidylinositol-4-phosphate 5-kinase	No	0.334677	0.306898	0.641575	0.450111	0.163685	0.65262	0.630529	PF3D7_0110600	1012	S	___1	DVPNIHNNNDDDGINCCTNLFKDDDT(0.025)LS(0.975)ALEK	28	GINCCTNLFKDDDTLSALEKNVTNNNLIKIM	MAL1P2.32;PFA0515w
PF3D7_1201000		Plasmodium exported protein (PHISTb), unknown function	Yes	0.334653	1.37401	1.70866	1.35845	1.38956	1.67775	1.73957	PF3D7_1201000	433	S	___1	IS(1)EEEDKQK	2	EIVQDVLQEFVEGKISEEEDKQKYAENLDDD	2277.t00010;MAL12P1.10;PFL0050c
PF3D7_1438400	MCA2	metacaspase-like protein	No	0.334478	-0.573273	-0.238794	-0.63736	-0.509186	-0.326939	-0.15065	PF3D7_1438400	397	S	___1	TLS(1)NILK	3	LKSSPNTENTFNKTLSNILKEQPKRSSMFSF	PF14_0362;PF14_0363
PF3D7_0500800	MESA	mature parasite-infected erythrocyte surface antigen	Yes	0.334332	-1.54184	-1.20751	-1.58978	-1.49391	-1.38872	-1.0263	PF3D7_0500800	354	T	___1	VS(0.002)GPY(0.006)ENS(0.64)ENS(0.713)NVT(0.713)S(0.704)ES(0.175)EET(0.047)KK	14	NKVSGPYENSENSNVTSESEETKKLAEKEEN	MAL5P1.9;PFE0040c
PF3D7_1205900		conserved protein, unknown function	No	0.334233	4.08288	4.41711	4.12961	4.03614	4.43528	4.39894	PF3D7_1205900	11	S	___1	NNFNPDIS(1)DDDYVSEK	8	_____MLKNNFNPDISDDDYVSEKQIFQGSN	2277.t00060;MAL12P1.59;PFL0295c
PF3D7_1410200	CTPS	cytidine triphosphate synthetase	No	0.333928	1.9315	2.26543	2.01258	1.85041	2.22787	2.30298	PF3D7_1410200	396	S	___2	YSYENFHENS(0.995)S(0.81)T(0.194)EK	10	KKKARKYSYENFHENSSTEKIIFVDDTTSDE	PF14_0100
PF3D7_0728000	eIF2alpha	eukaryotic translation initiation factor 2 subunit alpha, putative	No	0.333793	-0.173722	0.16007	-0.240719	-0.106726	0.17717	0.142971	PF3D7_0728000	98	S	___1	RVS(1)PKDIIK	3	VDSQKGYIDLSKRRVSPKDIIKCEEKFSKSK	PF07_0117
PF3D7_0619500	ACS12	acyl-CoA synthetase	Yes	0.333743	-2.56184	-2.2281	-2.63372	-2.48997	-1.81315	-2.64305	PF3D7_0619500	576	S	___1	ILSSYNDDYNKNNTNNIYINKS(0.5)S(0.5)HEQK	22	DDYNKNNTNNIYINKSSHEQKNMSLSPFDEN	2270.t00084;MAL6P1.231;PFF0945c
PF3D7_0619500	ACS12	acyl-CoA synthetase	Yes	0.333743	-2.56184	-2.2281	-2.63372	-2.48997	-1.81315	-2.64305	PF3D7_0619500	577	S	___1	ILSSYNDDYNKNNTNNIYINKS(0.5)S(0.5)HEQK	23	DYNKNNTNNIYINKSSHEQKNMSLSPFDENL	2270.t00084;MAL6P1.231;PFF0945c
PF3D7_1321100		conserved Plasmodium protein, unknown function	No	0.333114	1.63725	1.97036	1.76408	1.51041	1.95877	1.98195	PF3D7_1321100	942	S	___1	EGS(0.862)T(0.069)T(0.069)LK	3	VPSDENTINDKTKEGSTTLKTAMGYITKFKD	MAL13P1.114
PF3D7_0501300	SBP1	skeleton-binding protein 1	Yes	0.333112	6.32711	6.66022	6.36708	6.28715	6.58851	6.73194	PF3D7_0501300	324	S	___1	TQQNPQQNAQQNTQQNTQQQS(0.996)T(0.004)TK	21	QQNAQQNTQQNTQQQSTTKSTTKTVARET__	MAL5P1.14;PFE0065w
PF3D7_0415300	CRK3	cdc2-related protein kinase 3	No	0.333043	-0.668053	-0.33501	-0.53603	-0.800076	-0.25939	-0.410629	PF3D7_0415300	1124	S	___1	MKEYNHNRS(1)PSHAK	9	IKYYDHKMKEYNHNRSPSHAKKYNNEKREKE	MAL4P1.143;PFD0740w
PF3D7_0707600	MED10	conserved Plasmodium protein, unknown function	No	0.332852	-0.118917	0.213935	-0.10165	-0.136185	0.16036	0.267509	PF3D7_0707600	57	S	___2	FKDLDNS(0.987)Y(0.026)AS(0.987)DRK	7	DDNDESIEKFKDLDNSYASDRKQKEDNDLEK	PF07_0025
PF3D7_0707600	MED10	conserved Plasmodium protein, unknown function	No	0.332852	-0.118917	0.213935	-0.10165	-0.136185	0.16036	0.267509	PF3D7_0707600	60	S	___2	FKDLDNS(0.001)YAS(0.999)DR	10	DESIEKFKDLDNSYASDRKQKEDNDLEKKII	PF07_0025
PF3D7_0606000	KIC1	conserved Plasmodium protein, unknown function	No	0.332643	2.24539	2.57804	2.45549	2.0353	2.57418	2.58189	PF3D7_0606000	625	S	___1	S(0.5)KIS(0.5)DHGLNNDNVEQNICNLK	1	EDEDDNDNDNCRGQKSKISDHGLNNDNVEQN	2270.t00255;MAL6P1.63;PFF0295c
PF3D7_0320000	I2	protein phosphatase inhibitor 2	No	0.332598	-1.56665	-1.23405	-1.55274	-1.58056	-1.36635	-1.10176	PF3D7_0320000	115	S	___1	S(0.5)GT(0.5)LDDIDEEYKPDNK	1	KKHYNEYKMLQKLRKSGTLDDIDEEYKPDNK	PFC0886w
PF3D7_0817300		conserved Plasmodium protein, unknown function	No	0.332136	-0.293696	0.0384398	-0.319859	-0.267534	-0.0571404	0.13402	PF3D7_0817300	166	S	___1	NIIVIDDSLPNNS(0.013)NS(0.879)T(0.108)FDDKEK	15	KNIIVIDDSLPNNSNSTFDDKEKTETNNRIN	PF08_0060
PF3D7_0815800	VPS9	vacuolar protein sorting-associated protein 9, putative	No	0.332128	-0.686712	-0.354585	-0.72426	-0.649164	-0.49362	-0.215549	PF3D7_0815800	775	S	___1	DDDS(0.003)ILS(0.997)NEKLK	7	KKDLLNMSKDDDSILSNEKLKEKKKNLLKQD	MAL8P1.82
PF3D7_1312800		conserved Plasmodium protein, unknown function	No	0.331862	-2.25352	-1.92165	-2.07091	-2.43612	-1.83114	-2.01217	PF3D7_1312800	91	S	___1	GGS(0.048)IKNS(0.952)FMK	7	NGEKEGEEKGGSIKNSFMKIFQKKKKKKKKK	PF13_0072
PF3D7_0112200	MRP1	multidrug resistance-associated protein 1	No	0.331858	-3.41424	-3.08238	-3.28956	-3.53893	-3.08689	-3.07788	PF3D7_0112200	1531	S	___2	NVS(0.001)LS(0.008)S(0.007)IINS(0.432)S(0.552)QDDES(0.001)KK	11	IVEYKNVSLSSIINSSQDDESKKKYGIKFEN	MAL1P3.03;PFA0590w
PF3D7_0602600		conserved Plasmodium protein, unknown function	No	0.331807	-1.75887	-1.42706	-1.74863	-1.76911	-1.53248	-1.32164	PF3D7_0602600	467	S	___2	SIS(0.001)DAVS(0.999)EVS(1)DLS(1)DDNKNEK	7	RYLNNKNNKSISDAVSEVSDLSDDNKNEKGK	2270.t00289;MAL6P1.29;PFF0125c
PF3D7_0602600		conserved Plasmodium protein, unknown function	No	0.331807	-1.75887	-1.42706	-1.74863	-1.76911	-1.53248	-1.32164	PF3D7_0602600	473	S	___2	SIS(0.001)DAVS(0.999)EVS(1)DLS(1)DDNKNEK	13	NNKSISDAVSEVSDLSDDNKNEKGKEKVRNN	2270.t00289;MAL6P1.29;PFF0125c
PF3D7_0606000	KIC1	conserved Plasmodium protein, unknown function	No	0.331637	1.37835	1.70999	1.42628	1.33042	1.65834	1.76163	PF3D7_0606000	361	S	___1	NFTLPS(1)EEKITSYNFLK	6	SVIFPMEKYRNFTLPSEEKITSYNFLKKHNS	2270.t00255;MAL6P1.63;PFF0295c
PF3D7_0904800	RPA1	replication protein A1, small fragment	No	0.331633	0.0739479	0.405581	-0.368999	0.516895	0.807501	0.0036602	PF3D7_0904800	123	S	___1	KIS(1)LVNLR	3	HEVKDDGEIKIQKKISLVNLRDIKIATKETP	PFI0235w
PF3D7_1442400	KIC9	conserved Plasmodium protein, unknown function	No	0.331622	2.46144	2.79306	2.55654	2.36633	2.71127	2.87485	PF3D7_1442400	456	S	___2	ENNEY(0.001)KS(0.999)MMNS(0.997)FET(0.003)LK	7	GNENVIHLKENNEYKSMMNSFETLKIYEQDE	PF14_0402
PF3D7_1442400	KIC9	conserved Plasmodium protein, unknown function	No	0.331622	2.46144	2.79306	2.55654	2.36633	2.71127	2.87485	PF3D7_1442400	460	S	___2	SMMNS(1)FETLK	5	VIHLKENNEYKSMMNSFETLKIYEQDENNKQ	PF14_0402
PF3D7_0309600	PfP2	60S acidic ribosomal protein P2	No	0.331522	-4.84241	-4.51089	-4.83415	-4.85067	-4.80824	-4.21354	PF3D7_0309600	109	S	___1	KEEEEEEEDDLGFS(1)LFG	14	EKKEEEEEEEDDLGFSLFG____________	MAL3P3.19;PFC0400w
PF3D7_1342600	MyoA	myosin A	No	0.331283	2.77073	3.10201	2.4857	3.05576	3.58843	2.61559	PF3D7_1342600	19	S	___1	RVS(1)NVEAFDK	3	TNEEIKTASKIVRRVSNVEAFDKSGSVFKGY	PF13_0233
PF3D7_1110900		ES2 protein, putative	No	0.331217	-2.3042	-1.97298	-2.21604	-2.39235	-2.07814	-1.86782	PF3D7_1110900	4	T	___2	S(0.401)DT(0.585)S(0.065)S(0.943)IKIT(0.006)R	3	____________MSDTSSIKITRDEDIGYAE	PF11_0115
PF3D7_1423700		conserved Plasmodium protein, unknown function	No	0.331003	-0.176377	0.154626	-0.170069	-0.182686	0.196241	0.11301	PF3D7_1423700	284	T	___1	NVVVPYNDIGNKNEEKHNT(1)NEDYFNFGK	19	VPYNDIGNKNEEKHNTNEDYFNFGKDMGNPS	PF14_0228
PF3D7_1302000	PTP6	EMP1-trafficking protein	Yes	0.330453	3.05649	3.38694	3.04085	3.07212	3.47345	3.30043	PF3D7_1302000	302	S	___1	KDTNDNTTNNKS(1)ATK	12	KNIKKDTNDNTTNNKSATKTNVTKTS_____	PF13_0076
PF3D7_0104800	NPT1	novel putative transporter 1, putative	No	0.330377	-3.47365	-3.14327	-3.65577	-3.29152	-3.05357	-3.23297	PF3D7_0104800	253	T	___1	NNET(0.002)T(0.002)KHT(0.996)NAEGR	8	ALDYYLEKNNETTKHTNAEGRSRSSNNIYTN	MAL1P1.40;PFA0245w
PF3D7_1121000	DHHC3	palmitoyltransferase DHHC3	No	0.330303	-3.21139	-2.88109	-3.23375	-3.18904	-2.96498	-2.7972	PF3D7_1121000	12	T	___1	DDT(0.5)RS(0.5)KEADEFVR	3	____MNNHICAFRDDTRSKEADEFVRKNGFT	PF11_0217
PF3D7_0409600	RPA1	replication protein A1, large subunit	No	0.329453	1.78908	2.11854	1.76987	1.80829	2.16632	2.07075	PF3D7_0409600	290	S	___1	QNS(1)EHIMKENNNK	3	NNGKAYNHNVHNRQNSEHIMKENNNKNFTTP	MAL4P2.32;PFD0470c;PFD0475c
PF3D7_1006100	NOT5	CCR4-NOT transcription complex subunit 5, putative	No	0.329412	-2.32468	-1.99527	-2.26083	-2.38853	-1.96398	-2.02656	PF3D7_1006100	20	T	___1	KDNET(0.829)MS(0.171)LAAENMLENNFFK	5	NNNSYKKDKKKKDNETMSLAAENMLENNFFK	PF10_0062
PF3D7_1451200		conserved Plasmodium protein, unknown function	No	0.329368	-2.78209	-2.45272	-2.8219	-2.74228	-2.52582	-2.37962	PF3D7_1451200	1002	S	___1	RYENIS(1)ER	6	ETDGSNAFGRRYENISERTLYKDYVSTNLYR	PF14_0487
PF3D7_0606700		coatomer alpha subunit, putative	No	0.329308	0.159853	0.489161	0.122931	0.196775	0.47809	0.500231	PF3D7_0606700	1167	S	___1	SDFS(1)DENDIWK	4	SYNSEVNKFEGKSDFSDENDIWKNDVNDEDI	2270.t00249;MAL6P1.70;PFF0330w
PF3D7_0904600		ubiquitin specific protease, putative	No	0.329277	0.365948	0.695225	0.43672	0.295176	0.64563	0.74482	PF3D7_0904600	278	S	___1	NNNINSTVNYDNTNTEENIT(0.131)S(0.869)DHCNIKDDTR	21	STVNYDNTNTEENITSDHCNIKDDTRLEKDM	PFI0225w
PF3D7_1462400		conserved Plasmodium protein, unknown function	No	0.329177	-2.66352	-2.33434	-2.71799	-2.60905	-2.36484	-2.30384	PF3D7_1462400	575	S	___1	S(0.015)DYS(0.985)EDNNLLNNPYDNK	4	LKENRNKVKSSRSDYSEDNNLLNNPYDNKTR	PF14_0594
PF3D7_0202000	KAHRP	erythrocyte membrane protein 1, PfEMP1	Yes	0.328878	-1.10516	-0.776279	-1.07255	-1.13777	-0.751249	-0.80131	PF3D7_0202000;PF3D7_1255200	550;1774	S	___2	EAS(0.262)T(0.88)S(0.85)KEAT(0.008)K	5	AAEGATKGATKEASTSKEATKEASTSKEATK	PF02_0020;PFB0100c
PF3D7_0401800	PfD80	Plasmodium exported protein (PHISTb), unknown function	Yes	0.328798	3.04921	3.37801	3.09541	3.003	3.32569	3.43032	PF3D7_0401800	75	S	___2	RS(0.009)PS(0.987)T(0.004)ASTSTSLR	4	SSSCSSLASTTKRSPSTASTSTSLRSASTAS	MAL4P1.16;PFD0080c
PF3D7_1423200	CYP52	peptidyl-prolyl cis-trans isomerase	No	0.328777	-0.315618	0.0131598	-0.28771	-0.343525	-0.06106	0.0873795	PF3D7_1423200	220	S	___2	KEQNLLSFDYDQEIS(1)DDS(0.856)ET(0.145)FFR	15	KKEQNLLSFDYDQEISDDSETFFRGDKDQTV	2298.t00770;PF14_0223
PF3D7_1423200	CYP52	peptidyl-prolyl cis-trans isomerase	No	0.328777	-0.315618	0.0131598	-0.28771	-0.343525	-0.06106	0.0873795	PF3D7_1423200	223	S	___2	EQNLLS(0.001)FDY(0.146)DQEIS(0.869)DDS(0.869)ET(0.114)FFRGDKDQTVK	17	QNLLSFDYDQEISDDSETFFRGDKDQTVKQK	2298.t00770;PF14_0223
[truncated: 10,948 more rows]

## Sheet: 2 Human Phosphoproteome
Leading Protein ID	Gene Name	Product Description	Log2FC [WT iRBC (Post Heat Stress)/WT iRBC (No Heat Stress)]	Log2FC [uRBC (Post Heat Stress)/uRBC (No Heat Stress)]	Average WT (No Heat Stress)	Average WT (Post Heat Stress)	uRBC (No Heat Stress)	uRBC (Post Heat Stress)	WT iRBC Replicate 1 (No Heat Stress)	WT iRBC Replicate 2 (No Heat Stress)	WT iRBC Replicate 1 (Post Heat Stress)	WT iRBC Replicate 2 (Post Heat Stress)	Positions within protein	Amino acid	Possible Protein ID Matches	Multiplicity	Phospho (STY) Probabilities	Position in peptide	Sequence window
[truncated: 1,858 more rows]

[truncated: 2 more sheets: 3 Pf Proteome, 4 Human Proteome]
