# Supplementary material for: Physiological febrile heat stress increases cytoadhesion through increased protein trafficking of Plasmodium falciparum surface proteins into the red blood cell
Source: bioRxiv preprint, doi:10.1101/2025.05.14.653932, version 3 (2026-02-17)
Supplement: Supplementary Table 3 [file 653932_file05.xlsx]

## Sheet: README
Phosphoproteomes:
Column Name	Description
Leading proteins ID	Primary protein ID associated with the phosphopeptide source
Gene Name	Gene symbol corresponding to the protein
Product Description	Functional or annotated description of the protein product.
og2FC NF54 WT Heat Stress / NF54 WT Control	Log2 fold change in phosphopeptide abundance between conditions following heat stress and non-heat-stressed control in wild-type (NF54) parasites.
Log2FC FIKK1 KO Heat Stress / FIKK1 KO Control	Log2 fold change in phosphopeptide abundance for the FIKK1 knockout line following heat stress vs. non-heat-stressed control.
Log2FC FIKK4.1 KO Heat Stress / FIKK4.1 KO Control	Log2 fold change for FIKK4.1 knockout following heat stress compared to its non-heat-stressed control.
Log2FC FIKK4.2 KO Heat Stress / FIKK4.2 KO Control	Log2 fold change for FIKK4.2 knockout following heat stress vs. non-heat-stressed control.
Log2FC FIKK9's KO Heat Stress / FIKK9's KO Control	Log2 fold change for FIKK9s knockout following heat stress compared to its non-heat-stressed control.
Log2FC FIKK10.1 KO Heat Stress / FIKK10.1 KO Control	Log2 fold change for FIKK10.1 knockout following heat stress vs. non-heat-stressed control.
Log2FC FIKK10.2 KO Heat Stress / FIKK10.2 KO Control	Log2 fold change for FIKK10.2 knockout following heat stress vs. non-heat-stressed control.
Log2FC uRBC Heat Stress / uRBC Control	Log2 fold change in phosphopeptide abundance in uninfected red blood cells (uRBCs) following heat stress vs. non-heat-stressed control.
Log2 NF54	Log2-transformed phosphopeptide intensity for wild-type NF54 in non-heat-stressed control conditions.
Log2 NF54 Heat Stressed	Log2-transformed intensity for NF54 following heat stress.
Log2 KO FIKK1	Phosphopeptide intensity (log2) for FIKK1 KO in non-heat-stressed control conditions.
Log2 KO FIKK1 Heat Stressed	Same as above following heat stress.
Log2 KO FIKK4.1	Phosphopeptide intensity for FIKK4.1 KO in non-heat-stressed control conditions.
Log2 KO FIKK4.1 Heat Stressed	Same as above following heat stress.
Log2 KO FIKK4.2	Log2 intensity for FIKK4.2 KO in non-heat-stressed control condition.
Log2 KO FIKK4.2 Heat Stressed	Same as above following heat stress.
Log2 KO FIKK9s	Log2 intensity for FIKK9s KO in non-heat-stressed control conditions.
Log2 KO FIKK9s Heat Stressed	Same as above following heat stress.
Log2 KO FIKK10.1	Log2 intensity for FIKK10.1 KO in non-heat-stressed control.
Log2 KO FIKK10.1 Heat Stressed	Same as above following heat stress.
Log2 KO FIKK10.2	Log2 intensity for FIKK10.2 KO in non-heat-stressed control conditions.
Log2 KO FIKK10.2 Heat Stressed	Same as above following heat stress.
Log2 uRBC	Log2 intensity for uninfected red blood cells in non-heat-stressed control.
Log2 uRBC Heat Stressed	Same as above following heat stress.
Possible Protein ID Matches	All protein IDs to which the peptides could be mapped, separated by semicolons.
Positions within protein	Position(s) of the phosphorylated residue(s) within the full-length protein sequence.
Amino acid	The phosphorylated residue(s): S (Serine), T (Threonine), or Y (Tyrosine).
Multiplicity	Number of phosphorylation sites detected on the peptide.
Phospho (STY) Probabilities	Site localization probabilities indicating confidence in phosphorylation site assignment for each serine, threonine, or tyrosine.
Position in peptide	Position of the phosphorylated residue within the peptide sequence.
Sequence window	Amino acid sequence context surrounding the phosphorylation site
Predicted Host Exported? (Yes/No)	Indicates 'Yes' for P. falciparum proteins predicted to be exported beyond the parasite's plasma membrane.
Leading Protein Previous IDs	Lists identifiers that were previously used for this gene (P. falciparum genes only)
Proteomes:
Column Name	Description
Leading proteins ID	Primary identifier of the protein group
Gene Name	Gene symbol corresponding to the protein
Product Description	Functional or annotated description of the protein product.
Log2FC NF54 WT Heat Stressed / NF54 WT Control	Log2 fold change in protein abundance in wild-type NF54 parasites following heat stress vs. non-heat-stressed control.
Log2FC FIKK1 KO Heat Stressed / FIKK1 KO Control	Log2 fold change in protein abundance in FIKK1 knockout following heat stress compared to its non-heat-stressed control.
Log2FC FIKK4.1 KO Heat Stressed / FIKK4.1 KO Control	Log2 fold change for FIKK4.1 knockout following heat stress vs. its non-heat-stressed control.
Log2FC FIKK4.2 KO Heat Stressed / FIKK4.2 KO Control	Log2 fold change for FIKK4.2 knockout following heat stress compared to non-heat-stressed control.
Log2FC FIKK9's KO Heat Stressed / FIKK9's KO Control	Log2 fold change for FIKK9s knockout following heat stress vs. non-heat-stressed control.
Log2FC FIKK10.1 KO Heat Stressed / FIKK10.1 KO Control	Log2 fold change for FIKK10.1 knockout following heat stress vs. non-heat-stressed control.
Log2FC FIKK10.2 KO Heat Stressed / FIKK10.2 KO Control	Log2 fold change for FIKK10.2 knockout following heat stress vs. non-heat-stressed control.
Log2FC uRBC Heat Stress / uRBC Control	Log2 fold change for uninfected red blood cells following heat stress vs. non-heat-stressed control.
Log2 NF54	Log2-transformed protein abundance in wild-type NF54 under non-heat-stressed control conditions.
Log2 NF54 Heat Stressed	Log2-transformed protein abundance in NF54 following heat stress.
Log2 KO FIKK1	Log2 protein abundance in FIKK1 knockout under non-heat-stressed control conditions.
Log2 KO FIKK1 Heat Stressed	Same as above following heat stress.
Log2 KO FIKK4.1	Protein abundance (log2) in FIKK4.1 KO under non-heat-stressed control.
Log2 KO FIKK4.1 Heat Stressed	Same as above following heat stress.
Log2 KO FIKK4.2	Log2 protein abundance for FIKK4.2 KO in non-heat-stressed control.
Log2 KO FIKK4.2 Heat Stressed	Same as above following heat stress.
Log2 KO FIKK9s	Log2 protein abundance for FIKK9s KO in non-heat-stressed control.
Log2 KO FIKK9s Heat Stressed	Same as above following heat stress.
Log2 KO FIKK10.1	Log2 protein abundance for FIKK10.1 KO in non-heat-stressed control.
Log2 KO FIKK10.1 Heat Stressed	Same as above following heat stress.
Log2 KO FIKK10.2	Log2 protein abundance for FIKK10.2 KO in non-heat-stressed control.
Log2 KO FIKK10.2 Heat Stressed	Same as above following heat stress.
Log2 uRBC	Log2 protein abundance for uninfected red blood cells in non-heat-stressed control.
Log2 uRBC Heat Stressed	Same as above following heat stress.
Possible Protein ID Matches	All protein IDs to which the peptides could be mapped, separated by semicolons.
Intensity Proteome	Total measured protein abundance value, the sum of peptide intensities mapped to the protein group.
Razor + unique peptides Proteome	Number of razor peptides and unique peptides used for quantification.
Sequence coverage Proteome [%]	Percentage of the protein sequence covered by identified peptides.
Mol. weight [kDa]	Predicted molecular weight of the full-length protein in kilodaltons.
Predicted Host Exported? (Yes/No)	Indicates 'Yes' for P. falciparum proteins predicted to be exported beyond the parasite's plasma membrane.
Leading Protein Previous IDs	Lists identifiers that were previously used for this gene (P. falciparum genes only)

## Sheet: 1_16PLEX_Phospho_Pf
Leading Protein ID	Gene Name	Product Description	Predicted Host Exported? (Yes/No)	Log2FC NF54 WT Heat Stress / NF54 WT Control	Log2FC FIKK1 KO Heat Stress / FIKK1 KO Control	Log2FC FIKK4.1 KO Heat Stress / FIKK4.1 KO Control	Log2FC FIKK4.2 KO Heat Stress / FIKK4.2 KO Control	Log2FC FIKK9's KO Heat Stress / FIKK9's KO Control	Log2FC FIKK10.1 KO Heat Stress / FIKK10.1 KO Control	Log2FC FIKK10.2 KO Heat Stress / FIKK10.2 KO Control	Log2 NF54	Log2 NF54 Heat Stressed	Log2 KO FIKK1	Log2 KO FIKK1 Heat Stressed	Log2 KO FIKK4.1	Log2 KO FIKK4.1 Heat Stressed	Log2 KO FIKK4.2	Log2 KO FIKK4.2 Heat Stressed	Log2 KO FIKK9s	Log2 KO FIKK9s Heat Stressed	Log2 KO FIKK10.1	Log2 KO FIKK10.1 Heat Stressed	Log2 KO FIKK10.2	Log2 KO FIKK10.2 Heat Stressed	Possible Protein ID Matches	Positions within proteins	Amino acid	Phosphosite Multiplicity	Phospho (STY) Probabilities	Position in peptide	Sequence window	Leading Protein Previous IDs
PF3D7_0705100		conserved Plasmodium protein, unknown function	No	NaN	0.08953	1.6233	1.29434	-1.71559	0.50742	0.35823	-5.00051	NaN	-6.31118	-6.22165	-7.21415	-5.59085	-6.04467	-4.75033	-5.06444	-6.78003	-5.64461	-5.13719	-5.71079	-5.35256	PF3D7_0705100	6	S	___1	S(1)IHIS(1)DEEAEGR	5	__________MSIHISDEEAEGRNFDQKNKI	PF07_0021
PF3D7_1149000	Pf332	antigen 332, DBL-like protein	Yes	NaN	1.28609	0.1738	NaN	NaN	NaN	NaN	-6.2536	NaN	-6.83488	-5.54879	-5.6038	-5.43	-6.12938	NaN	NaN	-5.9712	NaN	NaN	NaN	NaN	PF3D7_1149000	3528	S	___1	EGSVNEEIIEEVGS(0.007)IT(0.007)EEMVEQDVS(0.985)DNEEIVEER	25	EEVGSITEEMVEQDVSDNEEIVEERSVIEEA	PF11_0506;PF11_0507
PF3D7_1429800		coatomer subunit beta, putative	No	NaN	0.51372	-0.52866	0.08443	-0.37001	-0.92588	0.08919	-4.91885	NaN	-5.46306	-4.94934	-4.97449	-5.50315	-5.1364	-5.05197	-4.86699	-5.237	-4.97445	-5.90033	-4.92096	-4.83177	PF3D7_1429800	1053	S	___2	NILNMLDEET(0.667)S(0.667)S(0.667)VCINENLEK	11	LKEKKNILNMLDEETSSVCINENLEKLKLKY	PF14_0277
PF3D7_1429800		coatomer subunit beta, putative	No	NaN	0.51372	-0.52866	0.08443	-0.37001	-0.92588	0.08919	-4.91885	NaN	-5.46306	-4.94934	-4.97449	-5.50315	-5.1364	-5.05197	-4.86699	-5.237	-4.97445	-5.90033	-4.92096	-4.83177	PF3D7_1429800	1054	S	___2	NILNMLDEET(0.021)S(0.112)S(0.867)VCINENLEK	12	KEKKNILNMLDEETSSVCINENLEKLKLKYT	PF14_0277
PF3D7_1429800		coatomer subunit beta, putative	No	NaN	0.51372	-0.52866	0.08443	-0.37001	-0.92588	0.08919	-4.91885	NaN	-5.46306	-4.94934	-4.97449	-5.50315	-5.1364	-5.05197	-4.86699	-5.237	-4.97445	-5.90033	-4.92096	-4.83177	PF3D7_1429800	1052	T	___2	NILNMLDEET(0.667)S(0.667)S(0.667)VCINENLEK	10	VLKEKKNILNMLDEETSSVCINENLEKLKLK	PF14_0277
PF3D7_1149000	Pf332	antigen 332, DBL-like protein	Yes	NaN	0.90955	NaN	NaN	NaN	NaN	NaN	-6.64824	NaN	-7.07951	-6.16996	NaN	NaN	NaN	NaN	NaN	NaN	NaN	-5.34569	NaN	NaN	PF3D7_1149000	3416	S	___1	EGSVSEEIVEEMGS(0.859)LT(0.141)EEIVDEER	14	EKEGSVSEEIVEEMGSLTEEIVDEERSTSED	PF11_0506;PF11_0507
PF3D7_1149000	Pf332	antigen 332, DBL-like protein	Yes	NaN	-0.01804	1.43918	NaN	NaN	-0.52053	NaN	NaN	-4.75459	-4.87504	-4.89308	-6.48802	-5.04884	NaN	-4.71512	NaN	NaN	-5.09992	-5.62045	NaN	-5.69414	PF3D7_1149000	4870	S	___2	VS(0.005)PS(0.995)EEVIEEQASTTEEFVEER	4	EERDTDEVLKEKVSPSEEVIEEQASTTEEFV	PF11_0506;PF11_0507
PF3D7_0423500	GAPM2	glideosome associated protein with multiple membrane spans 2	No	NaN	NaN	NaN	NaN	NaN	NaN	NaN	NaN	NaN	NaN	-6.57988	NaN	NaN	NaN	NaN	NaN	NaN	NaN	NaN	NaN	NaN	PF3D7_0423500	4	Y	___2	GS(0.029)Y(0.971)GMDVDDAYLHQGQYAAPYDNQYQQDDDT(0.005)PS(0.995)PR	3	____________MGSYGMDVDDAYLHQGQYA	MAL4P1.217;PFD1110w
PF3D7_1302100	G27/25	gamete antigen 27/25	No	4.33056	2.19447	1.28945	NaN	2.99241	2.71801	1.97232	-6.06233	-1.73177	-4.97166	-2.77719	-4.10276	-2.81331	NaN	-1.44162	-5.9013	-2.90889	-5.56347	-2.84546	-5.40329	-3.43097	PF3D7_1302100	208	T	___1	ISQFLIDVVDSYIIKPIPALPVT(1)PDEPHHNNI	23	VVDSYIIKPIPALPVTPDEPHHNNI______	PF13_0011
PF3D7_1302100	G27/25	gamete antigen 27/25	No	2.67747	1.33738	2.16586	3.04868	1.31828	1.09661	1.81622	-2.7412	-0.0637302	-2.68247	-1.34509	-3.1102	-0.94434	-2.68645	0.36223	-3.05085	-1.73257	-2.48288	-1.38627	-3.7172	-1.90098	PF3D7_1302100	8	S	___1	DS(1)AKPLDK	2	________MSKVQKDSAKPLDKFGNIYDYHY	PF13_0011
PF3D7_0402000		Plasmodium exported protein (PHISTa), unknown function	Yes	1.6807	0.641258	0.179819	1.93857	1.40842	1.21464	0.96435	-0.0901051	1.59059	-0.11516	0.526098	-0.494749	-0.31493	0.540525	2.47909	0.28952	1.69794	0.509941	1.72458	0.28157	1.24592	PF3D7_0402000	224	S	___1	FGS(1)YEQVLISQPHEFNER	3	QKYGRCYEERPNRFGSYEQVLISQPHEFNER	MAL4P1.18;PFD0090c
PF3D7_1134600		zinc finger protein, putative	No	1.66646	0.466489	0.561229	1.38407	0.94818	0.6139	0.375372	-0.719776	0.94668	0.970001	1.43649	0.408501	0.96973	0.328325	1.71239	0.14518	1.09336	0.40279	1.01669	0.417889	0.793261	PF3D7_1134600	1194	S	___1	NS(0.134)S(0.866)NNKNQNGTGNISK	3	GYKSCSCVHNIIRNSSNNKNQNGTGNISKKE	PF11_0357
PF3D7_0927200		zinc finger protein, putative	No	1.62497	0.775007	1.19112	1.72633	0.765138	1.0053	0.535791	-0.631716	0.99325	-0.414589	0.360418	-0.776539	0.414581	-0.541725	1.18461	-0.5683	0.196838	-0.69301	0.31229	-0.516861	0.0189304	PF3D7_0927200	901	T	___1	NCS(0.209)AT(0.791)INDHLIK	5	NKYNNQYIISRNCSATINDHLIKNHEMKNNY	PFI1335w
PF3D7_0702500		Plasmodium exported protein, unknown function	Yes	1.6038	0.571358	0.898011	1.04814	0.630419	0.82864	0.44036	-1.94496	-0.34116	-1.48964	-0.918282	-1.27344	-0.375429	-1.27055	-0.222408	-1.20961	-0.579191	-1.74209	-0.91345	-3.62886	-3.1885	PF3D7_0702500	171	S	___3	NS(0.023)S(0.109)QHS(0.867)VGS(0.008)HS(0.451)VS(0.65)S(0.891)QEHK	13	DGRNSSQHSVGSHSVSSQEHKKEHSTHDLPA	PF07_0008
PF3D7_0927200		zinc finger protein, putative	No	1.56223	0.59435	1.30509	1.78319	0.69195	1.02081	0.64672	-2.37037	-0.80814	-1.74795	-1.1536	-2.46699	-1.1619	-2.14548	-0.362289	-2.36444	-1.67249	-2.4216	-1.40079	-2.27992	-1.6332	PF3D7_0927200	761	T	___1	KNNT(1)NENIQMNNLIYNMSK	4	DIYKNDKKNIEKKNNTNENIQMNNLIYNMSK	PFI1335w
PF3D7_0604500		conserved Plasmodium protein, unknown function	No	1.55921	-0.01349	-0.23193	0.539415	0.840659	0.131588	-0.41466	-1.38085	0.17836	1.17926	1.16577	0.0137501	-0.21818	0.158026	0.697441	-0.17528	0.665379	-0.304089	-0.172501	0.66811	0.25345	PF3D7_0604500	1097	S	___1	NDNQLNS(1)KDGNNS(0.958)PS(0.042)K	13	GEKNDNQLNSKDGNNSPSKLNSNQNNNNNNN	2270.t00268;MAL6P1.48;PFF0220w
PF3D7_0927200		zinc finger protein, putative	No	1.5576	0.84489	0.77621	2.0244	0.85291	0.91712	0.65403	-2.01836	-0.46076	-1.96733	-1.12244	-1.94693	-1.17072	-1.89575	0.128651	-2.06018	-1.20727	-2.03632	-1.1192	-2.15477	-1.50074	PF3D7_0927200	1129	S	___1	NIS(1)NIINNNVILNNCSNK	3	NHMMNGKEGTSKKNISNIINNNVILNNCSNK	PFI1335w
PF3D7_0927200		zinc finger protein, putative	No	1.5234	0.999438	0.97383	1.5436	0.76218	0.95677	0.4859	-1.73993	-0.21653	-1.51147	-0.512032	-1.74495	-0.77112	-1.50187	0.0417309	-1.60651	-0.84433	-1.63475	-0.67798	-1.59428	-1.10838	PF3D7_0927200	899	S	___1	NCS(0.753)AT(0.247)INDHLIK	3	NANKYNNQYIISRNCSATINDHLIKNHEMKN	PFI1335w
PF3D7_0935900	REX1	ring-exported protein 1	Yes	1.43769	0.66995	0.90579	0.84866	0.39313	0.4399	0.016472	0.916775	2.35446	1.44654	2.11649	1.26539	2.17118	1.55355	2.40221	1.64907	2.0422	1.43462	1.87452	-0.785971	-0.769499	PF3D7_0935900	593	S	___1	GS(0.018)S(0.978)T(0.001)S(0.002)DK	3	KDALAKKESEAPKGSSTSDKNTTENQLNAEA	PFI1735c
PF3D7_0401800	PfD80	Plasmodium exported protein (PHISTb), unknown function	Yes	1.42047	0.37386	0.13615	1.31245	0.78682	0.86895	0.23191	2.37475	3.79522	2.54721	2.92107	4.11084	4.24699	2.02618	3.33863	2.18032	2.96714	2.10325	2.9722	1.40759	1.6395	PF3D7_0401800	283	T	___2	LPS(0.007)T(0.035)GS(0.962)T(0.996)IRFPSTGSSR	7	GSTSGSTTRLPSTGSTIRFPSTGSSRLEDYE	MAL4P1.16;PFD0080c
PF3D7_1437900	HSP40	HSP40, subfamily A	No	1.41084	0.25555	0.37334	0.59421	2.40058	1.03077	-0.06176	-7.03472	-5.62388	-4.79991	-4.54436	-4.518	-4.14466	-6.43559	-5.84138	-6.76548	-4.3649	-5.47744	-4.44667	-4.43857	-4.50033	PF3D7_1437900	11	S	___1	MFFS(0.001)S(0.011)GFPFDS(0.988)MGGQQAR	11	_____MFFSSGFPFDSMGGQQARRKREVNNN	PF14_0359
PF3D7_1362700		conserved Plasmodium protein, unknown function	No	1.39851	0.59937	0.746599	1.50585	0.65939	0.843809	0.27015	0.838045	2.23656	1.17779	1.77716	0.996901	1.7435	1.22142	2.72727	0.98144	1.64083	0.849691	1.6935	1.01054	1.28069	PF3D7_1362700	1816	S	___1	EY(0.003)DKT(0.432)S(0.565)DCDKNNTPLK	6	TQIKNEFNSKEYDKTSDCDKNNTPLKNGCNQ	MAL13P1.313;PF13_0332
PF3D7_0702500		Plasmodium exported protein, unknown function	Yes	1.39609	0.892559	0.905859	1.25879	0.58745	0.728039	-0.01726	-0.458965	0.93712	-0.0375195	0.85504	0.244181	1.15004	0.352095	1.61088	0.41954	1.00699	0.260061	0.9881	-1.72246	-1.73972	PF3D7_0702500	172	S	___3	NS(0.118)S(0.634)QHS(0.245)VGS(0.005)HS(0.002)VS(0.081)S(0.915)QEHK	14	GRNSSQHSVGSHSVSSQEHKKEHSTHDLPAG	PF07_0008
PF3D7_1407300	PRP38B	pre-mRNA-splicing factor 38B, putative	No	1.39178	0.623309	-0.117671	0.185526	0.088801	-0.30503	-0.086979	-1.37415	0.0176296	-1.24067	-0.617361	-0.984949	-1.10262	-0.988556	-0.80303	-0.907471	-0.81867	-0.341019	-0.646049	-0.586891	-0.67387	PF3D7_1407300	610	S	___2	S(0.474)S(0.547)LS(0.98)LKVDNIPVR	2	ATGKDYARRPTSYKSSLSLKVDNIPVRRRSR	PF14_0070
PF3D7_1407300	PRP38B	pre-mRNA-splicing factor 38B, putative	No	1.39178	0.623309	-0.117671	0.185526	0.088801	-0.30503	-0.086979	-1.37415	0.0176296	-1.24067	-0.617361	-0.984949	-1.10262	-0.988556	-0.80303	-0.907471	-0.81867	-0.341019	-0.646049	-0.586891	-0.67387	PF3D7_1407300	612	S	___2	S(0.474)S(0.547)LS(0.98)LKVDNIPVR	4	GKDYARRPTSYKSSLSLKVDNIPVRRRSRSR	PF14_0070
PF3D7_1039000	FIKK10.2	serine/threonine protein kinase, FIKK family	Yes	1.386	0.708099	0.951472	1.19674	0.965879	0.88792	-0.24803	-0.842886	0.54311	-0.82188	-0.113781	-1.34359	-0.392118	-0.551035	0.6457	-0.63311	0.332769	-1.21595	-0.32803	-2.68417	-2.9322	PF3D7_1039000	354	S	___2	FDGDQENIT(0.008)S(0.873)S(0.118)FER	10	DIKKRRFDGDQENITSSFERTQKSVKYDSDE	PF10_0380
PF3D7_0927200		zinc finger protein, putative	No	1.376	0.671257	0.968691	1.80146	0.7293	0.806901	0.989921	-0.874155	0.50185	-0.944569	-0.273312	-1.06955	-0.100859	-1.00681	0.794651	-1.14893	-0.41963	-1.12176	-0.314859	-1.51366	-0.523739	PF3D7_0927200	895	S	___1	YNNQYIIS(1)R	8	YLIENANKYNNQYIISRNCSATINDHLIKNH	PFI1335w
PF3D7_0500800	MESA	mature parasite-infected erythrocyte surface antigen	Yes	1.37125	0.630398	0.96169	1.12801	0.917188	1.18344	0.64891	-0.731146	0.6401	-0.90811	-0.277712	-1.21116	-0.24947	-0.515884	0.612122	-0.861389	0.0557995	-1.20992	-0.0264797	-0.92399	-0.27508	PF3D7_0500800	547	S	___2	VIGS(1)EKT(1)QK	4	DVKEKNDGKKDKVIGSEKTQKEIKEKVEKRV	MAL5P1.9;PFE0040c
PF3D7_0500800	MESA	mature parasite-infected erythrocyte surface antigen	Yes	1.37125	0.630398	0.96169	1.12801	0.917188	1.18344	0.64891	-0.731146	0.6401	-0.90811	-0.277712	-1.21116	-0.24947	-0.515884	0.612122	-0.861389	0.0557995	-1.20992	-0.0264797	-0.92399	-0.27508	PF3D7_0500800	550	T	___2	VIGS(1)EKT(1)QK	7	EKNDGKKDKVIGSEKTQKEIKEKVEKRVKKK	MAL5P1.9;PFE0040c
PF3D7_1039000	FIKK10.2	serine/threonine protein kinase, FIKK family	Yes	1.34554	0.640089	0.85584	1.18593	0.89434	1.02544	-0.03522	0.515585	1.86113	0.479721	1.11981	0.1471	1.00294	0.670244	1.85617	0.74342	1.63776	-0.0351105	0.99033	-1.4149	-1.45012	PF3D7_1039000	353	T	___2	FDGDQENIT(0.997)S(0.003)SFER	9	NDIKKRRFDGDQENITSSFERTQKSVKYDSD	PF10_0380
PF3D7_1140700		conserved Plasmodium protein, unknown function	No	1.34116	0.53589	0.348	-0.13984	0.24992	1.05497	0.06206	-4.28012	-2.93896	-3.68229	-3.1464	-4.24413	-3.89613	-3.58	-3.71984	-3.89894	-3.64902	-4.42791	-3.37294	-3.962	-3.89994	PF3D7_1140700	84	S	___2	NYDS(1)DENTWEPFENLSPNLK	4	NLDDFEFYIKWKNYDSDENTWEPFENLSPNL	PF11_0418
PF3D7_1039000	FIKK10.2	serine/threonine protein kinase, FIKK family	Yes	1.31905	0.591749	0.800129	1.17776	0.84764	1.12535	0.09866	-0.197525	1.12152	-0.27095	0.320799	-0.487379	0.31275	-0.137945	1.03981	0.0417404	0.88938	-0.87442	0.250931	-2.18807	-2.08941	PF3D7_1039000	355	S	___2	RFDGDQENITS(0.024)S(0.976)FER	12	IKKRRFDGDQENITSSFERTQKSVKYDSDES	PF10_0380
PF3D7_0202000	KAHRP	knob-associated histidine-rich protein	Yes	1.2982	-0.21524	-0.05597	0.59814	0.32562	0.03736	-0.6507	-0.0966053	1.20159	2.14317	1.92793	1.46336	1.40739	1.34591	1.94405	1.38506	1.71068	1.33417	1.37153	1.38403	0.73333	PF3D7_0202000	608	T	___2	GAS(0.148)T(0.846)T(0.835)AGS(0.287)T(0.697)T(0.225)GAT(0.783)T(0.179)GANAVQSK	13	ATKGASTTAGSTTGATTGANAVQSKDETADK	PF02_0020;PFB0100c
PF3D7_0702500		Plasmodium exported protein, unknown function	Yes	1.2777	0.948708	0.80801	1.22728	0.841599	1.01564	-0.64519	-0.863455	0.41424	-0.43195	0.516758	-0.566059	0.241951	-0.874775	0.352501	-1.29369	-0.452091	-2.23979	-1.22415	-3.14794	-3.79313	PF3D7_0702500	242	S	___2	YNTSNLAS(0.003)S(0.037)S(0.655)T(0.28)T(0.025)ES(0.049)S(0.95)VS(0.001)GLNTNEAHV	15	KYNTSNLASSSTTESSVSGLNTNEAHV____	PF07_0008
PF3D7_0731100	PTP2	EMP1-trafficking protein	Yes	1.27327	0.37723	0.2735	1.33049	0.540149	0.21726	0.25865	-1.34488	-0.0716095	-1.39305	-1.01582	-3.05441	-2.78091	-1.53448	-0.203989	-1.45016	-0.910011	-1.62972	-1.41246	-1.72896	-1.47031	PF3D7_0731100	279	S	___1	MPS(0.978)GT(0.022)FFDGIENLQR	3	NFQGTLKNEENPRMPSGTFFDGIENLQRVHK	MAL7P1.172
PF3D7_1362700		conserved Plasmodium protein, unknown function	No	1.27311	0.374269	0.750041	1.36388	0.820459	0.83176	0.03043	-1.34604	-0.0729294	-1.117	-0.742731	-1.38412	-0.634079	-1.23286	0.131021	-1.51217	-0.691711	-1.32405	-0.49229	-1.15694	-1.12651	PF3D7_1362700	798	S	___1	NEKDT(0.024)HS(0.976)DNNMK	7	SNHINDTTKNEKDTHSDNNMKSVPNNKNKNK	MAL13P1.313;PF13_0332
PF3D7_1126800	SR-MG	RNA-binding protein, putative	No	1.27135	0.62489	0.65794	1.43883	0.73895	0.57943	0.65737	-3.41691	-2.14556	-3.58167	-2.95678	-3.40214	-2.7442	-3.24345	-1.80462	-3.39612	-2.65717	-3.40104	-2.82161	-3.47795	-2.82058	PF3D7_1126800	909	S	___1	HS(0.989)NS(0.01)RYE	2	YGEHKYKGYRKEAKHSNSRYE__________	PF11_0279
PF3D7_0731100	PTP2	EMP1-trafficking protein	Yes	1.26523	0.46071	-0.11373	1.20667	0.51065	0.494899	0.257181	0.645815	1.91104	1.12291	1.58362	-1.22196	-1.33569	1.04963	2.2563	0.89011	1.40076	0.769241	1.26414	0.770979	1.02816	PF3D7_0731100	231	S	___1	IS(0.2)S(0.8)GSFISRPENIQGIAK	3	NIQGAGKIEEGSRISSGSFISRPENIQGIAK	MAL7P1.172
PF3D7_1362700		conserved Plasmodium protein, unknown function	No	1.26426	0.728008	0.922401	1.93403	0.682889	0.757451	0.77635	-1.11736	0.1469	-1.3477	-0.619692	-1.3211	-0.398699	-1.46342	0.470612	-1.14685	-0.463961	-1.17994	-0.422489	-1.45878	-0.68243	PF3D7_1362700	917	S	___1	EGSNVNS(0.979)CT(0.021)EENTGANNKEK	7	MNSSNNHFREGSNVNSCTEENTGANNKEKIF	MAL13P1.313;PF13_0332
PF3D7_0731100	PTP2	EMP1-trafficking protein	Yes	1.25502	0.55037	0.35914	1.30734	0.70718	0.46028	0.32738	-2.62438	-1.36936	-2.11776	-1.56739	-6.21482	-5.85568	-2.18524	-0.877899	-2.44861	-1.74143	-2.2135	-1.75322	-2.42428	-2.0969	PF3D7_0731100	230	S	___1	IS(0.501)S(0.433)GS(0.057)FIS(0.009)RPENIQGIAK	2	ENIQGAGKIEEGSRISSGSFISRPENIQGIA	MAL7P1.172
PF3D7_1128600	NOT2	CCR4-NOT transcription complex subunit 2, putative	No	1.245	0.704919	1.10162	1.31881	1.12554	0.923889	0.560049	0.114225	1.35923	0.593781	1.2987	-0.0391197	1.0625	0.165405	1.48421	0.058279	1.18382	-0.0981598	0.825729	0.25687	0.816919	PF3D7_1128600	314	S	___1	TIINDDVVYDINEEHT(0.019)S(0.981)ADEK	17	IINDDVVYDINEEHTSADEKIEKLRNDDILK	PF11_0297
PF3D7_0702500		Plasmodium exported protein, unknown function	Yes	1.2353	1.05432	0.780821	1.2306	0.795851	0.820999	0.35282	-0.715506	0.519791	-0.26058	0.793739	-0.02882	0.752001	0.219154	1.44975	-0.301571	0.49428	-0.146719	0.67428	-2.02392	-1.6711	PF3D7_0702500	160	S	___3	NS(0.776)S(0.748)QHS(0.474)VGS(0.008)HS(0.959)VS(0.023)S(0.014)QEHK	2	STENHLSGSNSDGRNSSQHSVGSHSVSSQEH	PF07_0008
PF3D7_0702500		Plasmodium exported protein, unknown function	Yes	1.21559	0.99459	0.92421	1.18615	0.61773	0.81125	0.14588	2.4642	3.67979	2.86185	3.85644	3.08236	4.00657	3.2914	4.47755	2.90278	3.52051	2.95286	3.76411	1.44238	1.58826	PF3D7_0702500	164	S	___3	NS(0.108)S(0.892)QHS(1)VGS(0.989)HS(0.009)VS(0.001)S(0.001)QEHK	6	HLSGSNSDGRNSSQHSVGSHSVSSQEHKKEH	PF07_0008
PF3D7_1149000	Pf332	antigen 332, DBL-like protein	Yes	1.21499	-0.15095	0.1527	0.44198	0.1373	0.0932	-0.29959	-3.61334	-2.39835	-3.65801	-3.80896	-3.5519	-3.3992	-3.74683	-3.30485	-3.58972	-3.45242	-4.50643	-4.41323	-3.5977	-3.89729	PF3D7_1149000	3538	S	___1	S(1)VIEEAEENVWIEK	1	VEQDVSDNEEIVEERSVIEEAEENVWIEKEV	PF11_0506;PF11_0507
PF3D7_1149000	Pf332	antigen 332, DBL-like protein	Yes	1.21183	0.82802	0.66187	1.05525	1.25353	1.17476	-0.25743	0.832674	2.0445	0.18152	1.00954	0.78791	1.44978	0.888266	1.94352	0.0547295	1.30826	0.00827026	1.18303	-1.93882	-2.19625	PF3D7_1149000	2542	T	___1	EES(0.246)VT(0.724)EEIVRQEES(0.009)T(0.009)T(0.011)EK	5	EESISEKIVEKEESVTEEIVRQEESTTEKIV	PF11_0506;PF11_0507
PF3D7_1149000	Pf332	antigen 332, DBL-like protein	Yes	1.2109	0.00026	0.53384	0.38502	1.84388	0.59116	1.13474	-4.52184	-3.31094	-3.64621	-3.64595	-3.75901	-3.22517	-3.5801	-3.19508	-7.10237	-5.25849	-4.10788	-3.51672	-4.48225	-3.34751	PF3D7_1149000	3098	S	___1	QGSVIEEVVEEEIS(0.844)T(0.134)T(0.022)EEK	14	GKQGSVIEEVVEEEISTTEEKLKEEASAIEE	PF11_0506;PF11_0507
PF3D7_0702500		Plasmodium exported protein, unknown function	Yes	1.21012	0.70656	0.79386	1.16036	0.71837	1.06991	-0.02012	4.26052	5.47064	4.54301	5.24957	4.57623	5.37009	4.35917	5.51953	3.53146	4.24983	3.67835	4.74826	1.50455	1.48443	PF3D7_0702500	211	S	___2	HYS(1)LGGQPSSSGR	3	STGTTSQGSTSSRHYSLGGQPSSSGRSFSGS	PF07_0008
PF3D7_0702500		Plasmodium exported protein, unknown function	Yes	1.207	0.76581	0.691481	0.757196	0.886559	0.969831	0.08695	-0.530445	0.67655	-0.42967	0.33614	-0.27149	0.419991	-0.218065	0.539131	-1.38682	-0.500261	-1.0841	-0.114269	-2.77075	-2.6838	PF3D7_0702500	200	T	___3	NYSLGNLS(0.617)T(0.329)GT(0.049)T(0.631)S(0.374)QGS(0.895)T(0.093)S(0.011)S(0.001)R	12	PAGRNYSLGNLSTGTTSQGSTSSRHYSLGGQ	PF07_0008
PF3D7_0603600		conserved Plasmodium protein, unknown function	No	1.20045	0.700098	0.68833	1.49164	0.47166	0.946651	0.44208	-1.55774	-0.35729	-1.57337	-0.873272	-1.44504	-0.75671	-1.75216	-0.260519	-1.47893	-1.00727	-1.76333	-0.816679	-1.53493	-1.09285	PF3D7_0603600	1269	T	___1	NFT(0.974)Y(0.024)PLINGT(0.001)FDDISIK	3	DKGVNNGFTNCRRNFTYPLINGTFDDISIKC	2270.t00333;MAL6P1.39;PFF0175c
PF3D7_0702500		Plasmodium exported protein, unknown function	Yes	1.20016	0.69308	0.76639	1.17889	0.68366	1.06051	-0.00635	4.0102	5.21036	4.28701	4.98009	4.32472	5.09111	4.08369	5.26258	3.29453	3.97819	3.42867	4.48918	1.3992	1.39285	PF3D7_0702500	217	S	___2	HYSLGGQPS(0.978)S(0.022)S(0.001)GR	9	QGSTSSRHYSLGGQPSSSGRSFSGSKYNTSN	PF07_0008
PF3D7_1362700		conserved Plasmodium protein, unknown function	No	1.19052	0.541679	0.729401	2.03746	0.66429	0.758481	0.28089	-1.26048	-0.0699596	-1.16889	-0.627211	-1.32412	-0.594719	-1.47853	0.558931	-1.23507	-0.57078	-1.36119	-0.602709	-1.26372	-0.98283	PF3D7_1362700	917	S	___2	EGSNVNS(0.979)CT(0.021)EENTGANNKEK	7	MNSSNNHFREGSNVNSCTEENTGANNKEKIF	MAL13P1.313;PF13_0332
PF3D7_1362700		conserved Plasmodium protein, unknown function	No	1.19052	0.541679	0.729401	2.03746	0.66429	0.758481	0.28089	-1.26048	-0.0699596	-1.16889	-0.627211	-1.32412	-0.594719	-1.47853	0.558931	-1.23507	-0.57078	-1.36119	-0.602709	-1.26372	-0.98283	PF3D7_1362700	919	T	___2	EGS(0.09)NVNS(0.793)CT(0.787)EENT(0.329)GANNKEK	9	SSNNHFREGSNVNSCTEENTGANNKEKIFVK	MAL13P1.313;PF13_0332
PF3D7_0702500		Plasmodium exported protein, unknown function	Yes	1.18656	0.65983	1.03679	1.2135	0.98165	0.419949	-0.04528	-1.39822	-0.21166	-1.0256	-0.36577	-1.11721	-0.0804195	-1.09056	0.12294	-1.97086	-0.98921	-1.09735	-0.677401	-2.47566	-2.52094	PF3D7_0702500	217	S	___3	HYSLGGQPS(0.978)S(0.022)S(0.001)GR	9	QGSTSSRHYSLGGQPSSSGRSFSGSKYNTSN	PF07_0008
PF3D7_1149000	Pf332	antigen 332, DBL-like protein	Yes	1.17882	0.9812	0.99677	1.23379	0.49959	0.87074	0.56786	1.19571	2.37453	1.11183	2.09303	1.51381	2.51058	1.1786	2.41239	1.10725	1.60684	1.01229	1.88303	1.13406	1.70192	PF3D7_1149000	437	S	___1	IS(1)IETSEIDRDKEPFR	2	IKPTYEENDEDKSKISIETSEIDRDKEPFRI	PF11_0506;PF11_0507
PF3D7_1353100		Plasmodium exported protein, unknown function	Yes	1.16617	0.91425	1.27937	1.17859	0.1548	0.746271	-0.12052	-1.67989	-0.51372	-0.81263	0.10162	-1.14105	0.138321	-0.824606	0.353981	-1.42897	-1.27417	-1.12532	-0.379049	-1.96943	-2.08995	PF3D7_1353100	107	T	___2	AHHT(0.985)GERT(0.47)S(0.4)Y(0.144)T(0.001)EVK	4	DHHEETEDVNHKAHHTGERTSYTEVKHRRSS	PF13_0275
PF3D7_0702500		Plasmodium exported protein, unknown function	Yes	1.15404	0.96935	0.92644	1.17555	0.5602	0.77812	0.12725	2.38396	3.538	2.74319	3.71254	2.9454	3.87184	3.15278	4.32833	2.76637	3.32657	2.84601	3.62413	1.37711	1.50436	PF3D7_0702500	161	S	___3	NS(0.108)S(0.892)QHS(1)VGS(0.989)HS(0.009)VS(0.001)S(0.001)QEHK	3	TENHLSGSNSDGRNSSQHSVGSHSVSSQEHK	PF07_0008
PF3D7_1362700		conserved Plasmodium protein, unknown function	No	1.15192	0.46446	1.09336	1.36089	0.6196	0.66067	0.47948	-1.91247	-0.76055	-2.17594	-1.71148	-2.23766	-1.1443	-1.84369	-0.4828	-1.92082	-1.30122	-1.91392	-1.25325	-2.09409	-1.61461	PF3D7_1362700	727	T	___1	NEIGT(0.212)DMCNHT(0.788)NDEK	11	NESIKNEIGTDMCNHTNDEKYVNEDNVGNLK	MAL13P1.313;PF13_0332
PF3D7_1334500	MSRP6	MSP7-like protein	Yes	1.15019	0.839529	0.95318	1.13129	-0.32765	0.92915	0.781611	0.121185	1.27137	0.661451	1.50098	0.48875	1.44193	0.500345	1.63164	-1.29768	-1.62533	0.52124	1.45039	0.433979	1.21559	PF3D7_1334500	49	S	___1	NEVFNALNEHLES(0.999)IS(0.001)NIVK	13	VKKNEVFNALNEHLESISNIVKVNIMDALSN	PF13_0192
PF3D7_1468100		conserved Plasmodium protein, unknown function	No	1.14692	0.13983	0.93051	0.56927	0.20188	-0.05777	0.51437	-4.92548	-3.77856	-4.44311	-4.30328	-5.0267	-4.09619	-4.86983	-4.30056	-4.30979	-4.10791	-3.81632	-3.87409	-4.51846	-4.00409	PF3D7_1468100	1231	S	___1	NS(0.999)VFGDAWLLS(0.001)LTGENPLR	2	NPVPCVFIQGGFKKNSVFGDAWLLSLTGENP	PF14_0649
PF3D7_0202000	KAHRP	erythrocyte membrane protein 1, PfEMP1	Yes	1.14237	0.2244	0.19088	0.34703	0.07354	-0.31468	-0.38946	6.28681	7.42918	6.67922	6.90362	6.83774	7.02862	6.72309	7.07012	7.0739	7.14744	6.8082	6.49352	4.95048	4.56102	PF3D7_0202000;PF3D7_1255200	548;1772	S	___1	EAS(0.987)T(0.011)S(0.002)KEATK	3	QCAAEGATKGATKEASTSKEATKEASTSKEA	PF02_0020;PFB0100c
PF3D7_0500800	MESA	mature parasite-infected erythrocyte surface antigen	Yes	1.14196	0.989509	1.07967	1.3321	0.52208	0.993909	0.826059	0.0485344	1.19049	0.497391	1.4869	0.1861	1.26577	0.525194	1.85729	-0.6085	-0.0864201	0.521151	1.51506	0	0.826059	PF3D7_0500800	448	T	___2	NIET(1)DDEEET(1)LVVKDDAK	4	FQMLGCNFLCNKNIETDDEEETLVVKDDAKK	MAL5P1.9;PFE0040c
PF3D7_0500800	MESA	mature parasite-infected erythrocyte surface antigen	Yes	1.14196	0.989509	1.07967	1.3321	0.52208	0.993909	0.826059	0.0485344	1.19049	0.497391	1.4869	0.1861	1.26577	0.525194	1.85729	-0.6085	-0.0864201	0.521151	1.51506	0	0.826059	PF3D7_0500800	454	T	___2	NIET(1)DDEEET(1)LVVKDDAK	10	NFLCNKNIETDDEEETLVVKDDAKKKHKFLR	MAL5P1.9;PFE0040c
PF3D7_0927200		zinc finger protein, putative	No	1.14151	0.76695	1.10488	1.88604	0.70104	0.7508	0.80759	-2.22768	-1.08617	-1.9323	-1.16535	-2.31516	-1.21028	-2.41329	-0.527248	-2.13797	-1.43693	-2.02056	-1.26976	-2.2452	-1.43761	PF3D7_0927200	1475	S	___1	LLYDENFENNS(0.999)DPT(0.001)YFFDDYNK	11	KIKNRLLYDENFENNSDPTYFFDDYNKSVAS	PFI1335w
PF3D7_0702500		Plasmodium exported protein, unknown function	Yes	1.13619	0.90137	0.94995	1.16724	0.4965	0.78125	-0.00013	1.85241	2.9886	2.17722	3.07859	2.34919	3.29914	2.47088	3.63812	2.17687	2.67337	2.20318	2.98443	0.820299	0.820169	PF3D7_0702500	169	S	___3	NS(0.149)S(0.853)QHS(0.972)VGS(0.032)HS(0.994)VS(0.464)S(0.537)QEHK	11	NSDGRNSSQHSVGSHSVSSQEHKKEHSTHDL	PF07_0008
PF3D7_0702500		Plasmodium exported protein, unknown function	Yes	1.13524	1.05347	0.90008	1.17751	0.6381	0.78663	0.191311	1.7347	2.86994	2.09866	3.15213	2.35164	3.25172	2.64511	3.82262	2.18723	2.82533	2.28204	3.06867	0.772749	0.96406	PF3D7_0702500	167	S	___3	NS(0.168)S(0.832)QHS(1)VGS(0.998)HS(0.002)VSSQEHK	9	GSNSDGRNSSQHSVGSHSVSSQEHKKEHSTH	PF07_0008
PF3D7_0500800	MESA	mature parasite-infected erythrocyte surface antigen	Yes	1.13378	0.58127	0.78995	1.04472	0.66775	0.68446	0.72747	5.70687	6.84065	5.98783	6.5691	6.16513	6.95508	6.16845	7.21317	6.00512	6.67287	6.07806	6.76252	5.72716	6.45463	PF3D7_0500800	383	S	___2	LGENVNDGAS(1)ENS(1)EDPKK	10	ENEGEKLGENVNDGASENSEDPKKLTEQEEN	MAL5P1.9;PFE0040c
PF3D7_0500800	MESA	mature parasite-infected erythrocyte surface antigen	Yes	1.13378	0.58127	0.78995	1.04472	0.66775	0.68446	0.72747	5.70687	6.84065	5.98783	6.5691	6.16513	6.95508	6.16845	7.21317	6.00512	6.67287	6.07806	6.76252	5.72716	6.45463	PF3D7_0500800	386	S	___2	LGENVNDGAS(1)ENS(1)EDPKK	13	GEKLGENVNDGASENSEDPKKLTEQEENGTK	MAL5P1.9;PFE0040c
PF3D7_0401800	PfD80	Plasmodium exported protein (PHISTb), unknown function	Yes	1.12578	0.48962	0.28182	1.24942	0.65381	0.87	0.04775	4.13903	5.26481	3.92322	4.41284	4.77592	5.05774	3.6039	4.85332	3.74241	4.39622	3.56441	4.43441	3.05744	3.10519	PF3D7_0401800	279	S	___2	LPS(0.983)T(0.017)GSTIR	3	SPSTGSTSGSTTRLPSTGSTIRFPSTGSSRL	MAL4P1.16;PFD0080c
PF3D7_1149000	Pf332	antigen 332, DBL-like protein	Yes	1.12504	0.58899	0.23687	0.37115	-0.11214	1.26324	1.08812	-3.71102	-2.58598	-3.72715	-3.13816	-3.49633	-3.25946	-3.31567	-2.94452	-5.0551	-5.16724	-4.76712	-3.50388	-4.23339	-3.14527	PF3D7_1149000	3255	S	___1	IVEEEKS(0.886)VT(0.114)EEVEEK	7	IDEKSLTEKIVEEEKSVTEEVEEKESVKEEV	PF11_0506;PF11_0507
PF3D7_1362700		conserved Plasmodium protein, unknown function	No	1.11275	0.359238	0.929809	1.08294	0.72177	0.68976	0.36581	-0.423985	0.688761	-0.2491	0.110138	-0.530609	0.3992	-0.132444	0.9505	-0.61212	0.10965	-0.50292	0.18684	-0.427971	-0.0621605	PF3D7_1362700	702	S	___1	NSLINSNIDDCT(0.001)EPYS(0.999)DVNK	16	NSLINSNIDDCTEPYSDVNKTYQYKNESIKN	MAL13P1.313;PF13_0332
PF3D7_0702500		Plasmodium exported protein, unknown function	Yes	1.10487	0.85065	0.80382	1.08387	0.798679	0.89875	-0.074719	0.945654	2.05052	1.05621	1.90686	1.20335	2.00717	1.24174	2.32561	0.466101	1.26478	0.65707	1.55582	-0.677881	-0.7526	PF3D7_0702500	196	S	___3	NYSLGNLS(0.994)T(0.184)GT(0.015)T(0.453)S(0.349)QGS(0.004)T(0.001)SSR	8	THDLPAGRNYSLGNLSTGTTSQGSTSSRHYS	PF07_0008
PF3D7_0702500		Plasmodium exported protein, unknown function	Yes	1.10487	0.85065	0.80382	1.08387	0.798679	0.89875	-0.074719	0.945654	2.05052	1.05621	1.90686	1.20335	2.00717	1.24174	2.32561	0.466101	1.26478	0.65707	1.55582	-0.677881	-0.7526	PF3D7_0702500	204	S	___3	NYSLGNLSTGTTSQGS(0.993)T(0.005)S(0.001)S(0.001)R	16	NYSLGNLSTGTTSQGSTSSRHYSLGGQPSSS	PF07_0008
PF3D7_1126800	SR-MG	RNA-binding protein, putative	No	1.08944	0.687818	0.88458	1.24042	0.78536	0.87685	0.512961	-0.120245	0.969191	-0.13796	0.549858	-0.0977592	0.786821	-0.128475	1.11194	-0.27256	0.5128	-0.23168	0.64517	-0.0369396	0.476021	PF3D7_1126800	750	S	___1	DMLSHNS(1)FEK	7	YDSPYYSPRDMLSHNSFEKNNLIQKKNEDNI	PF11_0279
PF3D7_0923000	RPB3	DNA-directed RNA polymerase II subunit RPB3, putative	No	1.08539	0.23302	-0.63471	-0.04738	0.49108	-0.76359	-0.99891	-4.74357	-3.65818	-4.04472	-3.8117	-3.95365	-4.58836	-3.83584	-3.88322	-4.35369	-3.86261	-3.78419	-4.54778	-3.99225	-4.99116	PF3D7_0923000	326	S	___1	EQGVS(0.996)LY(0.004)GIQLDLE	5	YSIDEVAKQLKEQGVSLYGIQLDLE______	PFI1130c
PF3D7_0702500		Plasmodium exported protein, unknown function	Yes	1.08054	0.81514	0.92512	1.01842	0.69295	0.82248	0.24799	1.78691	2.86745	2.00754	2.82268	2.1739	3.09902	2.2443	3.26272	1.43721	2.13016	1.71193	2.53441	0.47788	0.72587	PF3D7_0702500	181	T	___1	KEHS(0.081)T(0.919)HDLPAGR	5	GSHSVSSQEHKKEHSTHDLPAGRNYSLGNLS	PF07_0008
PF3D7_0702500		Plasmodium exported protein, unknown function	Yes	1.07806	0.981258	0.9493	1.28223	0.793381	0.77314	-0.20514	-0.300606	0.777451	-0.13706	0.844198	0.0130997	0.9624	0.115086	1.39732	-0.511801	0.28158	-0.24958	0.52356	-1.55687	-1.76201	PF3D7_0702500	197	T	___3	NY(0.016)S(0.049)LGNLS(0.964)T(0.939)GT(0.038)T(0.005)S(0.006)QGS(0.856)T(0.109)S(0.015)S(0.002)R	9	HDLPAGRNYSLGNLSTGTTSQGSTSSRHYSL	PF07_0008
PF3D7_1362700		conserved Plasmodium protein, unknown function	No	1.07027	0.41593	0.63103	1.53204	0.19673	0.46867	0.59366	-1.86226	-0.79199	-1.77528	-1.35935	-1.60579	-0.97476	-1.91848	-0.386438	-1.54909	-1.35236	-1.75295	-1.28428	-2.04291	-1.44925	PF3D7_1362700	935	S	___1	IFVKS(1)CDENIMK	5	EENTGANNKEKIFVKSCDENIMKNYQHPENI	MAL13P1.313;PF13_0332
PF3D7_0401800	PfD80	Plasmodium exported protein (PHISTb), unknown function	Yes	1.06841	1.10476	1.37736	1.62841	1.36506	1.43468	1.0389	0.777435	1.84584	0.307541	1.4123	-1.04747	0.329891	-0.393705	1.23471	-0.0180302	1.34703	-0.368099	1.06658	-0.6595	0.3794	PF3D7_0401800	302	S	___2	EGS(1)NVDIT(1)EEEEK	3	PSTGSSRLEDYEKEGSNVDITEEEEKEAESV	MAL4P1.16;PFD0080c
PF3D7_1478600	PTP3	EMP1-trafficking protein	Yes	1.06805	-0.00235	0.5044	0.700256	0.390389	0.206719	0.231989	-1.43711	-0.369059	-1.59877	-1.60112	-0.919729	-0.415329	-0.583475	0.116781	-0.77376	-0.383371	-0.501219	-0.2945	-0.83112	-0.599131	PF3D7_1478600	680	S	___1	S(0.001)IPNKLDS(0.999)QNGK	8	GKNEKNEKSIPNKLDSQNGKNEKNEKSIPNK	PF14_0758
PF3D7_0831700	HSP70x	heat shock protein 70	Yes	1.06129	0.42425	0.0006408	0.95457	0.59334	0.79973	0.50535	1.19074	2.25203	1.32226	1.74651	0.0100899	0.0107307	1.45037	2.40494	1.26663	1.85997	1.22412	2.02385	1.21703	1.72238	PF3D7_0831700	110	T	___1	FS(0.116)ET(0.668)T(0.216)VQSDMK	4	TVFDAKRLIGRKFSETTVQSDMKHWPFTVKG	MAL7P1.228
PF3D7_1128600	NOT2	CCR4-NOT transcription complex subunit 2, putative	No	1.0599	0.7241	0.867981	0.947735	0.673519	1.11758	0.624081	-0.204124	0.85578	-0.19202	0.53208	-0.34721	0.520771	-0.248144	0.699591	-0.32135	0.352169	-0.65798	0.4596	-0.403351	0.22073	PF3D7_1128600	313	T	___1	TIINDDVVYDINEEHT(0.938)S(0.062)ADEK	16	TIINDDVVYDINEEHTSADEKIEKLRNDDIL	PF11_0297
PF3D7_1416600		conserved Plasmodium protein, unknown function	No	1.05432	0.593	0.901111	0.95835	0.743198	1.10864	0.54041	-1.46616	-0.41184	-1.59833	-1.00533	-1.65932	-0.758209	-1.44925	-0.4909	-1.61549	-0.872292	-1.93657	-0.82793	-1.58557	-1.04516	PF3D7_1416600	731	S	___1	IVTHEFGS(1)DKEK	8	NKFIDKNKIVTHEFGSDKEKYIEQNEPSIYN	PF14_0165
PF3D7_1149000	Pf332	antigen 332, DBL-like protein	Yes	1.04727	0.582039	0.732789	0.815006	0.857627	0.952459	0.510221	1.2756	2.32287	0.614231	1.19627	0.873821	1.60661	0.836584	1.65159	0.00250053	0.860128	-0.1607	0.791759	0.504549	1.01477	PF3D7_1149000	2176	S	___1	LINEVGET(0.002)ES(0.998)VTEEIVQK	10	VVEEEKLINEVGETESVTEEIVQKEVSDAEE	PF11_0506;PF11_0507
PF3D7_0501200	PIESP2	parasite-infected erythrocyte surface protein	Yes	1.04564	-0.01608	0.66002	-0.10425	0.57311	-0.03666	0.24451	-4.06605	-3.02041	-3.35192	-3.368	-4.11912	-3.4591	-3.77147	-3.87572	-4.00365	-3.43054	-4.11287	-4.14953	-3.82323	-3.57872	PF3D7_0501200	269	T	___1	QES(0.5)RT(0.5)LILGSFPQAGEILR	5	VGQAPPEKEIRQESRTLILGSFPQAGEILRE	MAL5P1.13;PFE0060w
PF3D7_0731100	PTP2	EMP1-trafficking protein	Yes	1.04436	0.46185	0.06841	1.35592	0.20191	0.386391	0.40885	-0.995806	0.0485497	-0.12365	0.3382	-2.12288	-2.05447	-0.442724	0.9132	-0.66148	-0.45957	-0.07341	0.312981	-0.91634	-0.50749	PF3D7_0731100	255	S	___1	NEESSRIPS(0.865)GS(0.132)FFNS(0.003)PQNFQGTLK	9	NIQGIAKNEESSRIPSGSFFNSPQNFQGTLK	MAL7P1.172
PF3D7_0702400	SEMP1	small exported membrane protein 1	Yes	1.04175	0.25399	0.00015	0.35739	0.32739	0.127991	-0.22297	-0.262985	0.778761	1.92421	2.1782	1.11479	1.11494	1.47101	1.8284	1.28518	1.61257	-0.69606	-0.568069	1.1631	0.94013	PF3D7_0702400	2	S	___1	S(1)QPQKQQNEEGAATAANTQEK	1	______________MSQPQKQQNEEGAATAA	PF07_0007
PF3D7_1149000	Pf332	antigen 332, DBL-like protein	Yes	1.0375	0.96717	0.67195	1.09413	1.01833	0.99988	-0.07774	1.46837	2.50587	1.06284	2.03001	1.82163	2.49358	1.6391	2.73323	1.03247	2.0508	1.22855	2.22843	-0.85733	-0.93507	PF3D7_1149000	2540	S	___1	IVEKEES(1)VTEEIVRQEESTTEK	7	KEEESISEKIVEKEESVTEEIVRQEESTTEK	PF11_0506;PF11_0507
PF3D7_1149000	Pf332	antigen 332, DBL-like protein	Yes	1.03574	0.8076	0.77059	0.94955	0.79808	0.91293	0.69355	3.10134	4.13708	3.25062	4.05822	3.44494	4.21553	3.80226	4.75181	3.33758	4.13566	3.23776	4.15069	3.45598	4.14953	PF3D7_1149000	759	S	___1	SVS(1)EEIPVEEK	3	GQLINEEKPVEEKSVSEEIPVEEKSVSEEIP	PF11_0506;PF11_0507
PF3D7_1149000	Pf332	antigen 332, DBL-like protein	Yes	1.03436	0.74108	0.66203	0.49517	0.45064	0.42922	0.47405	1.42681	2.46117	1.86795	2.60903	2.20717	2.8692	2.17723	2.6724	2.09411	2.54475	1.87588	2.3051	1.45269	1.92674	PF3D7_1149000	209	S	___1	KDEYDIQS(1)R	8	FKDWLETKKDEYDIQSRVFEKKYANDNKSKH	PF11_0506;PF11_0507
PF3D7_0617200		conserved Plasmodium protein, unknown function	No	1.02335	0.61926	0.64321	-0.07218	-0.69809	-0.14643	-0.21755	-4.59041	-3.56706	-4.30667	-3.68741	-4.11364	-3.47043	-3.672	-3.74418	-4.01937	-4.71746	-3.78688	-3.93331	-3.99044	-4.20799	PF3D7_0617200	431	S	___1	LT(0.002)T(0.008)FKS(0.99)GEHHNK	6	TNKIKEIDEKLTTFKSGEHHNKGTKANKVKA	2270.t00061;MAL6P1.254;PFF0835w
PF3D7_1149000	Pf332	antigen 332, DBL-like protein	Yes	1.01624	0.996448	0.908241	1.19762	0.45365	0.81031	0.854821	-2.36548	-1.34924	-0.906139	0.0903091	-0.74295	0.165291	-0.832075	0.365541	-1.12521	-0.67156	-0.269739	0.540571	-1.31379	-0.458969	PF3D7_1149000	770	S	___1	SVSEEIPVEEKS(0.032)VS(0.968)EEIPVEEK	14	EKSVSEEIPVEEKSVSEEIPVEEKSVSEEIP	PF11_0506;PF11_0507
PF3D7_0702500		Plasmodium exported protein, unknown function	Yes	1.01216	0.73498	0.63878	1.02465	0.61879	0.844509	0.1992	-0.487135	0.52503	-0.36516	0.36982	-0.155439	0.483341	-0.297094	0.727551	-0.648411	-0.0296211	-0.649279	0.19523	-2.8201	-2.6209	PF3D7_0702500	172	S	___2	NS(0.118)S(0.634)QHS(0.245)VGS(0.005)HS(0.002)VS(0.081)S(0.915)QEHK	14	GRNSSQHSVGSHSVSSQEHKKEHSTHDLPAG	PF07_0008
PF3D7_0731100	PTP2	EMP1-trafficking protein	Yes	0.996426	0.389617	-0.67251	1.11315	0.35882	0.54561	0.0016518	0.118694	1.11512	0.332541	0.722158	-1.53474	-2.20725	0.192755	1.3059	0.185579	0.544399	0.12719	0.6728	0.0626392	0.064291	PF3D7_0731100	448	S	___1	YT(0.086)S(0.891)GS(0.02)FY(0.002)NGNSNYQTSYK	3	NFSGSKITEENNRYTSGSFYNGNSNYQTSYK	MAL7P1.172
PF3D7_0702500		Plasmodium exported protein, unknown function	Yes	0.99557	0.7979	0.7967	1.043	0.69397	0.81162	0.186512	1.24417	2.23974	1.55324	2.35114	1.4819	2.2786	1.6916	2.7346	1.15192	1.84589	1.29124	2.10286	-0.801851	-0.615339	PF3D7_0702500	160	S	___2	NS(0.776)S(0.748)QHS(0.474)VGS(0.008)HS(0.959)VS(0.023)S(0.014)QEHK	2	STENHLSGSNSDGRNSSQHSVGSHSVSSQEH	PF07_0008
PF3D7_0702500		Plasmodium exported protein, unknown function	Yes	0.994836	0.796669	0.74199	1.10641	0.346408	0.73624	0.007452	0.0512543	1.04609	0.269201	1.06587	0.41267	1.15466	0.345205	1.45161	-0.00349045	0.342918	0.10854	0.84478	-0.966581	-0.959129	PF3D7_0702500	191	S	___3	NYS(1)LGNLSTGTTSQGSTSSR	3	KKEHSTHDLPAGRNYSLGNLSTGTTSQGSTS	PF07_0008
PF3D7_1200700	ACS7	acyl-CoA synthetase	Yes	0.988385	0.16405	-0.14724	0.54311	0.60237	0.07941	-0.22313	0.665245	1.65363	2.87622	3.04027	1.893	1.74576	2.38021	2.92332	2.02989	2.63226	2.42135	2.50076	2.33645	2.11332	PF3D7_1200700	777	S	___1	S(0.476)GS(0.523)KDDIKS(0.903)GS(0.098)K	9	GSKDDIKSGSKDDIKSGSKADIKSGSKDDIK	2277.t00007;MAL12P1.7;PFL0035c
PF3D7_0527200	USP14	ubiquitin carboxyl-terminal hydrolase 14	No	0.98089	0.00697	0.35834	0.7799	0.55313	0.35256	0.00115	-4.03254	-3.05165	-2.86862	-2.86165	-3.22747	-2.86913	-3.3433	-2.5634	-3.21526	-2.66213	-3.35043	-2.99787	-3.07333	-3.07218	PF3D7_0527200	415	S	___1	KVS(1)FPDTFDMYDFCSEK	3	NSGVSVVTAKICRKVSFPDTFDMYDFCSEKI	MAL5P1.271;PFE1355c
PF3D7_0603600		conserved Plasmodium protein, unknown function	No	0.975336	0.539808	0.65958	0.940767	0.443798	0.609178	0.354589	-0.530205	0.445131	-0.47143	0.0683784	-0.572689	0.0868912	-0.286976	0.653791	-0.527189	-0.0833912	-0.488119	0.121059	-0.57094	-0.216351	PF3D7_0603600	1229	S	___1	NYT(0.28)FS(0.72)LLEYEK	5	YGKYWKKGGKKNYTFSLLEYEKISNDPRGIY	2270.t00333;MAL6P1.39;PFF0175c
PF3D7_1466200	EGXP	conserved Plasmodium protein, unknown function	No	0.97415	0.4114	0.49796	0.93482	0.94675	0.41647	0.20686	-2.29734	-1.32319	-2.30849	-1.89709	-2.28896	-1.791	-2.316	-1.38118	-2.56041	-1.61366	-2.45653	-2.04006	-2.22512	-2.01826	PF3D7_1466200	1326	S	___1	NIEEDLADLDEDS(0.5)T(0.5)ENINEPNHLDGQNNK	13	NFRNIEEDLADLDEDSTENINEPNHLDGQNN	PF14_0631
PF3D7_1466200	EGXP	conserved Plasmodium protein, unknown function	No	0.97415	0.4114	0.49796	0.93482	0.94675	0.41647	0.20686	-2.29734	-1.32319	-2.30849	-1.89709	-2.28896	-1.791	-2.316	-1.38118	-2.56041	-1.61366	-2.45653	-2.04006	-2.22512	-2.01826	PF3D7_1466200	1327	T	___1	NIEEDLADLDEDS(0.5)T(0.5)ENINEPNHLDGQNNK	14	FRNIEEDLADLDEDSTENINEPNHLDGQNNK	PF14_0631
PF3D7_1006100	NOT5	CCR4-NOT transcription complex subunit 5, putative	No	0.97377	0.94597	0.75181	1.33529	0.71732	0.89313	0.55404	-3.30125	-2.32748	-3.26847	-2.3225	-3.17483	-2.42302	-3.56081	-2.22552	-3.17021	-2.45289	-3.05867	-2.16554	-3.2767	-2.72266	PF3D7_1006100	22	S	___1	KDNET(0.168)MS(0.832)LAAENMLENNFFK	7	NSYKKDKKKKDNETMSLAAENMLENNFFKLQ	PF10_0062
PF3D7_0702500		Plasmodium exported protein, unknown function	Yes	0.972606	0.7838	0.52444	1.47133	0.713269	0.37252	-0.18848	0.0299339	1.00254	1.1878	1.9716	1.09013	1.61457	0.548876	2.02021	-0.0303497	0.682919	1.24124	1.61376	-2.48161	-2.67009	PF3D7_0702500	237	S	___2	S(0.011)FS(0.767)GS(0.212)KYNT(0.01)SNLAS(0.002)S(0.052)S(0.823)T(0.103)T(0.02)ESSVSGLNTNEAHV	16	SFSGSKYNTSNLASSSTTESSVSGLNTNEAH	PF07_0008
PF3D7_0401800	PfD80	Plasmodium exported protein (PHISTb), unknown function	Yes	0.97032	1.03389	1.02107	1.40666	1.30482	1.38034	0.981771	1.08765	2.05797	0.58816	1.62205	-0.301859	0.719212	0.0286045	1.43526	0.27043	1.57525	0.0272007	1.40754	-0.270731	0.71104	PF3D7_0401800	307	T	___2	EGS(1)NVDIT(1)EEEEK	8	SRLEDYEKEGSNVDITEEEEKEAESVDDNNK	MAL4P1.16;PFD0080c
PF3D7_0936800		Plasmodium exported protein (PHISTc), unknown function	Yes	0.96585	0.455	0.55408	1.04597	0.58312	0.55589	0.43341	1.29392	2.25977	1.11902	1.57402	1.31443	1.86851	1.35365	2.39962	1.4441	2.02722	1.26862	1.82451	1.18058	1.61399	PF3D7_0936800	318	S	___1	VQPPKS(1)QQQK	6	VQPPKVQQQKVQPPKSQQQKVQPPKSQQQKV	PFI1780w
PF3D7_1149000	Pf332	antigen 332, DBL-like protein	Yes	0.964287	0.826689	0.89024	0.687445	0.582769	0.7474	0.579831	-0.141356	0.822931	-0.4396	0.387089	-0.0897598	0.80048	-0.00665474	0.68079	-0.9013	-0.318531	-0.472429	0.274971	-0.166901	0.41293	PF3D7_1149000	1065	S	___1	ELPVKEESVFEELTEEDQS(1)VTK	19	VKEESVFEELTEEDQSVTKEIPVEEHSVFKE	PF11_0506;PF11_0507
PF3D7_0113200		Plasmodium exported protein, unknown function	Yes	0.956165	-0.107892	0.99712	0.482786	0.09566	0.27617	-0.042731	-0.797985	0.15818	-0.0361404	-0.144032	-2.84571	-1.84859	-0.835825	-0.353039	-1.30302	-1.20736	-1.28115	-1.00498	-0.55953	-0.602261	PF3D7_0113200	190	S	___1	NQS(0.052)IS(0.91)S(0.038)NNNNNNNKEEEEECTK	5	DKRNISISNKRNQSISSNNNNNNNKEEEEEC	MAL1P3.08;PFA0630c
PF3D7_1134600		zinc finger protein, putative	No	0.953426	0.338108	0.805279	0.905805	0.71749	0.842319	0.411201	-0.174625	0.778801	-0.09902	0.239088	-0.538109	0.26717	-0.314575	0.59123	-0.506741	0.210749	-0.76861	0.0737095	-0.597761	-0.18656	PF3D7_1134600	923	S	___1	GEEGEIS(0.017)S(0.983)PKER	8	NILINNVRGEEGEISSPKERNIPKKDIEIIP	PF11_0357
PF3D7_0927200		zinc finger protein, putative	No	0.950306	0.756277	0.73793	0.975256	0.56567	0.81526	0.672791	-0.608576	0.34173	-0.769249	-0.0129719	-0.693279	0.044651	-0.387054	0.588202	-0.618681	-0.0530109	-0.620979	0.194281	-0.80925	-0.136459	PF3D7_0927200	1528	S	___1	SEGGLS(0.999)NDIY(0.001)NNEK	6	NLDIYEFSCKSEGGLSNDIYNNEKDILDTRR	PFI1335w
PF3D7_1451800	SORTLR	sortilin	No	0.946466	-0.44328	-0.54966	0.33157	0.61488	-0.12137	-1.06618	0.777014	1.72348	3.53166	3.08838	1.95118	1.40152	2.1615	2.49307	1.90447	2.51935	1.51606	1.39469	2.93569	1.86951	PF3D7_1451800	885	S	___1	NIS(0.13)PS(0.87)KNYADNIELL	5	RTNQNNNITSRNISPSKNYADNIELL_____	PF14_0493
PF3D7_1005100	UTP25	U3 small nucleolar RNA-associated protein 25, putative	No	0.9435	0.13255	0.07613	0.28099	0.62342	-0.03312	0.43951	-2.69958	-1.75608	-1.80954	-1.67699	-1.90618	-1.83005	-2.17126	-1.89027	-2.54603	-1.92261	-1.90151	-1.93463	-2.41975	-1.98024	PF3D7_1005100	520	T	___1	KDS(0.019)CDDEDVT(0.679)DS(0.197)Y(0.087)MINNVQNDES(0.018)IEISK	10	VKDENKKDSCDDEDVTDSYMINNVQNDESIE	PF10_0054
PF3D7_1149000	Pf332	antigen 332, DBL-like protein	Yes	0.94349	0.662239	0.521611	0.548807	0.25913	0.44371	0.25746	-1.59855	-0.65506	-1.31344	-0.651201	-1.10319	-0.581579	-0.885715	-0.336908	-2.40248	-2.14335	-1.22215	-0.77844	-1.48642	-1.22896	PF3D7_1149000	2124	S	___1	HDEVDRS(0.837)T(0.139)T(0.024)EEIVEK	7	HEEVSTTEKHDEVDRSTTEEIVEKVGSVSEE	PF11_0506;PF11_0507
PF3D7_1362700		conserved Plasmodium protein, unknown function	No	0.941177	0.41441	0.82311	0.892305	0.502041	0.453071	0.247051	-0.877676	0.0635014	-0.90975	-0.49534	-0.887409	-0.0642986	-0.812454	0.0798512	-0.987341	-0.4853	-0.58736	-0.134289	-0.75407	-0.507019	PF3D7_1362700	1910	S	___1	IEIY(0.001)ES(0.999)DKCNHNGVSK	6	NIQNNSLEDKIEIYESDKCNHNGVSKCDINN	MAL13P1.313;PF13_0332
PF3D7_1149000	Pf332	antigen 332, DBL-like protein	Yes	0.940657	0.835949	0.776821	0.710966	0.625691	0.710459	0.65254	-0.347466	0.593191	0.15185	0.987799	0.268909	1.04573	0.626024	1.33699	0.118429	0.74412	0.225981	0.93644	0.164089	0.816629	PF3D7_1149000	814	S	___1	NVSEEIPVEEKNVS(1)EEIPVEEK	14	EKNVSEEIPVEEKNVSEEIPVEEKNVSEEIP	PF11_0506;PF11_0507
PF3D7_1338700		conserved Plasmodium protein, unknown function	No	0.93442	0.05314	-0.5156	0.72982	-0.61338	0.21857	-0.22553	-4.35602	-3.4216	-4.07831	-4.02517	-3.6257	-4.1413	-3.97449	-3.24467	-4.00239	-4.61577	-4.45784	-4.23927	-3.79086	-4.01639	PF3D7_1338700	231	S	___1	WLMNESNMNELPENIKDEY(0.001)VS(0.86)Y(0.015)LCS(0.124)PLK	21	SNMNELPENIKDEYVSYLCSPLKRSERLIKS	MAL13P1.194
PF3D7_0221200		Plasmodium exported protein (hyp15), unknown function	Yes	0.93362	-0.35325	0.63367	0.484938	0.51436	0.51301	0.56552	1.08788	2.0215	-3.03608	-3.38933	0.76951	1.40318	0.468584	0.953522	1.1684	1.68276	1.16709	1.6801	1.07259	1.63811	PF3D7_0221200	128	S	___1	S(0.018)T(0.014)S(0.968)GIIR	3	EFEKCFIKNNSLKSTSGIIRLKNWLYRKMFK	PF02_0198;PFB0953w
PF3D7_1353100		Plasmodium exported protein, unknown function	Yes	0.93362	0.79894	1.29087	1.15759	-0.02034	0.81212	-0.45155	-3.18933	-2.25571	-2.47103	-1.67209	-2.67175	-1.38088	-2.55496	-1.39737	-2.94994	-2.97028	-2.76959	-1.95747	-4.18891	-4.64046	PF3D7_1353100	112	S	___2	T(0.034)S(0.966)YTEVK	2	TEDVNHKAHHTGERTSYTEVKHRRSSSNSHV	PF13_0275
PF3D7_1353100		Plasmodium exported protein, unknown function	Yes	0.93362	0.79894	1.29087	1.15759	-0.02034	0.81212	-0.45155	-3.18933	-2.25571	-2.47103	-1.67209	-2.67175	-1.38088	-2.55496	-1.39737	-2.94994	-2.97028	-2.76959	-1.95747	-4.18891	-4.64046	PF3D7_1353100	111	T	___2	T(0.742)S(0.258)YTEVK	1	ETEDVNHKAHHTGERTSYTEVKHRRSSSNSH	PF13_0275
PF3D7_1230800	WTAP	pre-mRNA-splicing regulator, putative	No	0.929695	0.644287	0.6588	0.758797	0.691321	0.803961	0.366591	-0.624565	0.30513	-0.372839	0.271448	-0.80821	-0.14941	-0.536976	0.221821	-0.896391	-0.20507	-1.0686	-0.264639	-0.947691	-0.5811	PF3D7_1230800	312	S	___1	YGPHS(1)KYNK	5	DNNSKHEYSNKYGPHSKYNKHHSNKYDKYDQ	2277.t00297;MAL12P1.297;PFL1485w
PF3D7_0813300		conserved Plasmodium protein, unknown function	No	0.92767	0.2138	0.32341	0.88863	0.19723	0.53382	-0.07292	-4.19826	-3.27059	-3.87058	-3.65678	-4.1758	-3.85239	-4.22462	-3.33599	-3.7531	-3.55587	-4.58816	-4.05434	-3.54637	-3.61929	PF3D7_0813300	64	T	___1	NVCEDT(1)PLDIFLMLDNDVK	6	GCYNICCLQKNVCEDTPLDIFLMLDNDVKIK	MAL8P1.95
PF3D7_1347200	NT1	nucleoside transporter 1	No	0.9263	-0.19224	-0.36575	0.23818	0.28961	-0.03686	-0.67671	1.24415	2.17045	3.3347	3.14246	2.41521	2.04946	2.59786	2.83604	2.533	2.82261	2.15404	2.11718	3.05577	2.37906	PF3D7_1347200	8	S	___1	ES(0.105)S(0.895)KAYADIESR	3	________MSTGKESSKAYADIESRGDYKDD	PF13_0252
PF3D7_1134600		zinc finger protein, putative	No	0.926066	0.495067	0.52611	1.01707	0.52742	0.64574	0.45954	-0.246235	0.679831	-0.177179	0.317888	-0.316109	0.210001	-0.337934	0.679131	-0.33342	0.194	-0.35791	0.28783	-0.41165	0.0478897	PF3D7_1134600	42	S	___1	S(0.003)YS(0.997)QGDNEK	3	KNNNLSTLEKDKRSYSQGDNEKLICVQLNIE	PF11_0357
PF3D7_0422200		erythrocyte membrane-associated antigen	No	0.921905	-0.13963	-0.14357	0.14824	0.360631	0.049181	-0.54143	-0.146215	0.77569	1.79572	1.65609	0.73893	0.59536	1.02533	1.17357	0.956169	1.3168	0.54809	0.597271	1.3646	0.82317	PF3D7_0422200	4152	S	___1	S(1)IDKISK	1	NNILSEYYKIKKRQKSIDKISKLYKDEIKKK	MAL4P1.204;PFD1045c
PF3D7_0401800	PfD80	Plasmodium exported protein (PHISTb), unknown function	Yes	0.919	0.52636	0.3498	1.18245	0.54849	0.82182	-0.03656	3.89557	4.81457	3.45093	3.97729	3.98069	4.33049	3.28778	4.47023	3.41081	3.9593	3.1481	3.96992	2.93924	2.90268	PF3D7_0401800	288	S	___2	FPS(0.991)T(0.009)GSSR	3	STTRLPSTGSTIRFPSTGSSRLEDYEKEGSN	MAL4P1.16;PFD0080c
PF3D7_1123100	CDPK7	calcium-dependent protein kinase 7	No	0.91704	-0.04545	-0.49898	0.19595	-0.04654	-0.79725	0.11006	-4.10937	-3.19233	-3.54704	-3.59249	-3.53364	-4.03262	-4.00782	-3.81187	-3.29776	-3.3443	-3.19117	-3.98842	-3.60668	-3.49662	PF3D7_1123100	2108	T	___1	NEEINILNLQDVS(0.048)VS(0.384)T(0.568)FNIPR	16	NEEINILNLQDVSVSTFNIPRYTPLHIEEEK	PF11_0242
PF3D7_1149000	Pf332	antigen 332, DBL-like protein	Yes	0.907241	0.550419	0.692141	0.501427	-0.08994	0.65658	0.597031	-1.34703	-0.439789	-1.1752	-0.624781	-1.47161	-0.779469	-0.811695	-0.310268	-3.95167	-4.04161	-1.60457	-0.94799	-1.53862	-0.941589	PF3D7_1149000	4766	S	___1	SVTGDVVEQEGS(1)GKDESEAK	12	LEDKSVTGDVVEQEGSGKDESEAKESFTEEV	PF11_0506;PF11_0507
PF3D7_1149000	Pf332	antigen 332, DBL-like protein	Yes	0.90386	0.81882	1.07491	0.607151	0.61436	1.08672	0.90281	-1.91121	-1.00735	-2.12932	-1.3105	-2.55676	-1.48185	-1.51284	-0.905689	-2.30425	-1.68989	-2.85886	-1.77214	-2.41037	-1.50756	PF3D7_1149000	4891	T	___1	S(0.075)S(0.075)T(0.851)DEIVEVEDLFTEEVK	3	EQASTTEEFVEERSSTDEIVEVEDLFTEEVK	PF11_0506;PF11_0507
PF3D7_0702400	SEMP1	small exported membrane protein 1	Yes	0.90014	0.53401	0.64383	0.76215	0.47545	0.94125	-0.1422	3.26386	4.164	3.05203	3.58604	3.09391	3.73774	3.28264	4.04479	2.9528	3.42825	2.29208	3.23333	1.10758	0.96538	PF3D7_0702400	33	S	___1	NPS(0.459)QS(0.541)GPYR	5	NTQEKKFNPTRNPSQSGPYRHHGPQGRTPYM	PF07_0007
PF3D7_1435600		conserved Plasmodium protein, unknown function	No	0.89826	0.49214	0.64679	0.81247	0.67101	0.52807	0.43617	2.33397	3.23223	2.47939	2.97153	2.27827	2.92506	2.32158	3.13405	2.15075	2.82176	2.44081	2.96888	2.27706	2.71323	PF3D7_1435600	1732	S	___1	T(0.001)LS(0.999)DNSPTK	3	GYETNKNEKKIIRTLSDNSPTKKGVNNIYTQ	PF14_0337
PF3D7_1149000	Pf332	antigen 332, DBL-like protein	Yes	0.89377	0.61058	0.59151	0.81991	0.93193	0.897	0.35664	2.58516	3.47893	1.87652	2.4871	1.93433	2.52584	2.17315	2.99306	1.72835	2.66028	1.25591	2.15291	1.39356	1.7502	PF3D7_1149000	1379	S	___1	EGS(1)INEDIVK	3	EEEELVTEEVIEREGSINEDIVKEASITEEV	PF11_0506;PF11_0507
PF3D7_0418100	SOC1	conserved Plasmodium protein, unknown function	No	0.89323	-0.12254	-0.16826	-0.28456	-0.49058	-0.02288	0.03617	-4.85354	-3.96031	-3.14582	-3.26836	-3.30942	-3.47768	-2.95852	-3.24308	-2.90603	-3.39661	-2.85086	-2.87374	-3.25211	-3.21594	PF3D7_0418100	15	S	___1	LKNNDMS(1)LELIK	7	_MDNGIYWRLKNNDMSLELIKYIEEDDIKNI	MAL4P1.170;PFD0875c
PF3D7_1334500	MSRP6	MSP7-like protein	Yes	0.89223	0.50187	0.38135	0.78741	0.11718	0.62774	0.64036	-3.07281	-2.18058	-2.53523	-2.03336	-2.54371	-2.16236	-2.82928	-2.04187	-2.78348	-2.6663	-2.78549	-2.15775	-3.65521	-3.01485	PF3D7_1334500	67	S	___1	VNIMDALS(0.032)NNPS(0.968)LIK	12	NIVKVNIMDALSNNPSLIKKTYEAVEINDDD	PF13_0192
PF3D7_0702500		Plasmodium exported protein, unknown function	Yes	0.89016	0.83035	0.87744	0.99161	0.65295	0.73798	0.24938	3.43921	4.32937	3.45896	4.28931	3.53057	4.40801	3.63218	4.62379	2.88729	3.54024	3.13585	3.87383	1.95621	2.20559	PF3D7_0702500	180	S	___1	KEHS(0.996)T(0.004)HDLPAGR	4	VGSHSVSSQEHKKEHSTHDLPAGRNYSLGNL	PF07_0008
PF3D7_0702500		Plasmodium exported protein, unknown function	Yes	0.88967	0.6398	0.70545	0.94465	0.65268	0.7563	0.169632	2.36833	3.258	2.58851	3.22831	2.56746	3.27291	2.70115	3.6458	2.22333	2.87601	2.29311	3.04941	0.604269	0.773901	PF3D7_0702500	161	S	___2	NS(0.108)S(0.892)QHS(1)VGS(0.989)HS(0.009)VS(0.001)S(0.001)QEHK	3	TENHLSGSNSDGRNSSQHSVGSHSVSSQEHK	PF07_0008
PF3D7_1127100	dUTPase	deoxyuridine 5'-triphosphate nucleotidohydrolase	No	0.88661	0.366278	0.385429	0.595756	0.370199	-0.003031	0.231691	-1.00235	-0.11574	-0.719519	-0.353241	-0.819719	-0.43429	-0.615665	-0.0199089	-0.686489	-0.31629	-0.767639	-0.77067	-0.879831	-0.64814	PF3D7_1127100	93	S	___1	S(0.16)S(0.839)IS(0.001)KTPLR	2	KSNIVNTSFLLFPRSSISKTPLRLANSIGLI	PF11_0282
PF3D7_0902000	FIKK9.1	serine/threonine protein kinase, FIKK family	Yes	0.88487	0.8804	0.59919	1.13876	-1.37355	0.56238	0.6082	-4.21282	-3.32795	-4.31594	-3.43554	-3.94693	-3.34774	-3.99008	-2.85132	-5.10595	-6.4795	-3.49931	-2.93693	-4.3728	-3.7646	PF3D7_0902000	74	T	___1	T(0.005)LEGFLCDT(0.995)LNGIIFK	9	IRVKGSKTLEGFLCDTLNGIIFKSTKEKSDN	PFI0095c
PF3D7_1134600		zinc finger protein, putative	No	0.882161	0.268518	0.877651	1.11809	0.671168	0.88734	0.367551	-1.10241	-0.220249	-1.02667	-0.758152	-1.57185	-0.694199	-1.39178	-0.273689	-1.43633	-0.765162	-1.94976	-1.06242	-1.34138	-0.973829	PF3D7_1134600	922	S	___1	GEEGEIS(0.543)S(0.457)PKER	7	YNILINNVRGEEGEISSPKERNIPKKDIEII	PF11_0357
PF3D7_1478600	PTP3	EMP1-trafficking protein	Yes	0.88197	-0.11865	0.811291	1.19899	0.57403	0.6806	0.41384	-1.99296	-1.11099	-3.45176	-3.57041	-1.66528	-0.853989	-1.95916	-0.76017	-1.99268	-1.41865	-1.65788	-0.97728	-2.25298	-1.83914	PF3D7_1478600	322	S	___1	NEESTNDTTT(0.001)NDTS(0.196)S(0.803)NMETK	15	KNEESTNDTTTNDTSSNMETKNEPAMKNPNV	PF14_0758
PF3D7_1149000	Pf332	antigen 332, DBL-like protein	Yes	0.88041	0.69282	0.58342	0.85918	0.66119	0.84966	0.58969	1.28976	2.17017	1.2646	1.95742	1.39984	1.98326	1.64438	2.50356	1.19323	1.85442	1.07267	1.92233	1.34995	1.93964	PF3D7_1149000	803	S	___1	NVS(1)EEIPVEEK	3	EKSVSEEIPVEEKNVSEEIPVEEKNVSEEIP	PF11_0506;PF11_0507
PF3D7_1478600	PTP3	EMP1-trafficking protein	Yes	0.878395	0.52084	1.00892	0.937315	0.608407	0.722941	0.60244	-0.0275154	0.85088	-2.02531	-1.50447	-0.58917	0.41975	-0.133875	0.80344	-0.223289	0.385118	-0.171	0.551941	-0.62479	-0.0223503	PF3D7_1478600;PF3D7_1477000	900;645	S	___1	S(0.143)ES(0.857)LKK	3	DMLNKNQKGKQLKSESLKKNELENKNTKNMD	PF14_0758
PF3D7_0923900	PABP2	RNA-binding protein, putative	No	0.87402	-0.57105	0.40502	0.99932	-0.5277	-0.4326	-0.41091	-5.54851	-4.67449	-4.79203	-5.36308	-4.84846	-4.44344	-5.14674	-4.14742	-4.63909	-5.16679	-4.06108	-4.49368	-4.52023	-4.93114	PF3D7_0923900	89	S	___1	SIFVGNVDY(0.012)S(0.014)T(0.014)QPEELQS(0.921)LFS(0.04)ECGLINR	18	FVGNVDYSTQPEELQSLFSECGLINRVTILV	PFI1175c
PF3D7_0113200		Plasmodium exported protein, unknown function	Yes	0.87196	0.45518	0.524132	0.60857	0.60661	0.445569	0.32681	1.3499	2.22186	1.05857	1.51375	0.0117397	0.535872	1.16398	1.77255	1.01445	1.62106	0.772741	1.21831	0.84943	1.17624	PF3D7_0113200	393	S	___2	HES(1)LHSYNIK	3	VVYNDKIRKSNNRHESLHSYNIKETPKKNKK	MAL1P3.08;PFA0630c
PF3D7_0113200		Plasmodium exported protein, unknown function	Yes	0.87196	0.45518	0.524132	0.60857	0.60661	0.445569	0.32681	1.3499	2.22186	1.05857	1.51375	0.0117397	0.535872	1.16398	1.77255	1.01445	1.62106	0.772741	1.21831	0.84943	1.17624	PF3D7_0113200	396	S	___2	HES(1)LHS(0.983)Y(0.017)NIK	6	NDKIRKSNNRHESLHSYNIKETPKKNKKKSQ	MAL1P3.08;PFA0630c
PF3D7_1478600	PTP3	EMP1-trafficking protein	Yes	0.871536	0.003688	0.74201	0.588276	0.6339	0.505629	0.272721	-0.095335	0.776201	-0.806089	-0.802401	-0.0412693	0.700741	0.141615	0.729891	-0.178261	0.455639	0.126501	0.63213	-0.2363	0.0364208	PF3D7_1478600	453	S	___1	DNLQDS(1)NKGLNVTTNK	6	FIENDVSDKKDNLQDSNKGLNVTTNKTNDKT	PF14_0758
PF3D7_1134600		zinc finger protein, putative	No	0.86927	0.588279	0.65185	1.27221	0.62253	0.74973	0.489381	-1.13001	-0.26074	-1.27737	-0.689091	-1.2102	-0.55835	-1.33293	-0.0607185	-1.37632	-0.75379	-1.29013	-0.5404	-1.3555	-0.866119	PF3D7_1134600	2	S	___1	S(0.788)QS(0.212)KPNQEISSR	1	______________MSQSKPNQEISSRNLHE	PF11_0357
PF3D7_1002100	PTP5	EMP1-trafficking protein	Yes	0.864571	0.379819	0.321401	0.640521	0.566009	0.17243	0.66825	-1.70982	-0.845249	-1.20165	-0.821831	-1.2369	-0.915499	-1.04667	-0.406149	-1.45741	-0.891401	-1.1509	-0.97847	-1.57474	-0.90649	PF3D7_1002100	255	S	___1	GS(0.5)S(0.5)EGETSSK	2	PSKYTMNLDSPLLKGSSEGETSSKKAQEKSV	PF10_0025
PF3D7_1321700	SF1	splicing factor 1	No	0.86105	0.39845	0.63447	0.25528	0.26216	0.01727	0.10564	-3.37011	-2.50906	-2.65746	-2.25901	-2.93222	-2.29775	-2.88395	-2.62867	-3.24873	-2.98657	-3.02759	-3.01032	-3.2619	-3.15626	PF3D7_1321700	5	S	___1	MEENS(0.544)Y(0.456)FEAVEK	5	___________MEENSYFEAVEKLFEIKNSK	MAL13P1.120
PF3D7_0113200		Plasmodium exported protein, unknown function	Yes	0.859624	-0.87656	0.32518	0.553166	0.34418	0.35765	0.5723	0.761866	1.62149	-2.60259	-3.47915	0.50004	0.82522	0.855104	1.40827	0.736	1.08018	1.13096	1.48861	0.56419	1.13649	PF3D7_0113200	134	S	___1	NS(0.054)GLS(0.946)HMFSSEINK	5	KKEEQKNKQTKNSGLSHMFSSEINKTQTNES	MAL1P3.08;PFA0630c
PF3D7_0404600		conserved Plasmodium membrane protein, unknown function	No	0.859295	0.406797	0.622049	0.735494	0.383869	0.654008	0.539332	-0.757105	0.10219	-0.491869	-0.0850716	-0.607929	0.0141201	-0.725494	0.0100002	-0.446079	-0.0622101	-0.703199	-0.0491905	-0.791531	-0.252199	PF3D7_0404600	3344	S	___1	NNNNNNIVS(0.164)CS(0.836)EDEGKNK	11	KNNIKNNNNNNIVSCSEDEGKNKNHKNDEND	MAL4P1.44;PFD0220c;PFD0220w;PFD0225w
PF3D7_0401800	PfD80	Plasmodium exported protein (PHISTb), unknown function	Yes	0.85687	0.773589	-0.12134	1.19442	0.67608	0.699589	0.088912	1.08786	1.94473	0.805941	1.57953	3.23382	3.11248	0.542675	1.73709	0.82197	1.49805	0.615801	1.31539	0.532249	0.621161	PF3D7_0401800	282	S	___1	LPSTGS(0.98)T(0.019)IRFPSTGSSR	6	TGSTSGSTTRLPSTGSTIRFPSTGSSRLEDY	MAL4P1.16;PFD0080c
PF3D7_0306700	EMC5	membrane magnesium transporter, putative	No	0.85442	0.06782	-0.10806	0.56625	0.33939	0.08331	-0.21804	-2.85373	-1.99931	-1.52591	-1.45809	-2.14489	-2.25295	-2.14233	-1.57608	-2.33042	-1.99103	-2.11173	-2.02842	-1.86945	-2.08749	PF3D7_0306700	114	S	___1	NFIKDFVGS(1)PI	9	NRKQYIKNFIKDFVGSPI_____________	PFC0282w
PF3D7_1149000	Pf332	antigen 332, DBL-like protein	Yes	0.84855	0.691109	0.53158	0.62911	0.73744	1.00122	0.20565	1.84025	2.6888	0.997931	1.68904	1.18798	1.71956	1.51744	2.14655	1.49291	2.23035	0.58131	1.58253	-1.93089	-1.72524	PF3D7_1149000	4498	S	___1	QVS(0.951)VT(0.049)EDIVEK	3	LEEETATEEIVEKQVSVTEDIVEKEGSVNEE	PF11_0506;PF11_0507
PF3D7_0702500		Plasmodium exported protein, unknown function	Yes	0.84595	0.48474	0.62926	0.72942	0.60246	0.66843	0.00191	2.82456	3.67051	2.89477	3.37951	2.90971	3.53897	2.97453	3.70395	2.46006	3.06252	2.54355	3.21198	1.18308	1.18499	PF3D7_0702500	204	S	___2	NYSLGNLSTGTTSQGS(0.993)T(0.005)S(0.001)S(0.001)R	16	NYSLGNLSTGTTSQGSTSSRHYSLGGQPSSS	PF07_0008
PF3D7_0801000		Plasmodium exported protein (PHISTc), unknown function	Yes	0.84526	0.46949	0.61875	0.93417	0.2897	0.64638	0.15435	3.51519	4.36045	3.01485	3.48434	3.15236	3.77111	3.26254	4.19671	3.23492	3.52462	3.02032	3.6667	0.0578499	0.2122	PF3D7_0801000	158	S	___1	GS(1)LGFDSFK	2	NDQNSRNNTPNLRKGSLGFDSFKKLELGTLN	PF08_0137
PF3D7_1149000	Pf332	antigen 332, DBL-like protein	Yes	0.8432	0.45634	0.48151	0.7812	0.22108	1.73379	0.42794	-3.60445	-2.76125	-3.48709	-3.03075	-3.76346	-3.28195	-3.88085	-3.09965	-4.76251	-4.54143	-5.42472	-3.69093	-3.8659	-3.43796	PF3D7_1149000	4889	S	___1	S(0.804)S(0.094)T(0.101)DEIVEVEDLFTEEVKER	1	IEEQASTTEEFVEERSSTDEIVEVEDLFTEE	PF11_0506;PF11_0507
PF3D7_0702500		Plasmodium exported protein, unknown function	Yes	0.84232	0.47878	0.6147	0.70828	0.57868	0.60463	0.06596	3.13375	3.97607	3.18417	3.66295	3.18475	3.79945	3.28674	3.99502	2.77448	3.35316	2.89287	3.4975	1.70887	1.77483	PF3D7_0702500	191	S	___2	NYS(1)LGNLSTGTTSQGSTSSR	3	KKEHSTHDLPAGRNYSLGNLSTGTTSQGSTS	PF07_0008
PF3D7_1478600	PTP3	EMP1-trafficking protein	Yes	0.83797	0.44852	0.954	0.56658	0.30956	0.62269	0.43348	-2.49548	-1.65751	-3.42314	-2.97462	-2.30835	-1.35435	-2.18534	-1.61876	-2.65046	-2.3409	-2.18627	-1.56358	-2.83166	-2.39818	PF3D7_1478600	216	S	___1	IDNLS(0.997)NKPT(0.003)DLRR	5	ESGLYGPMKGKIDNLSNKPTDLRRTNNTDYG	PF14_0758
PF3D7_1016300	GBP130	glycophorin binding protein	Yes	0.836876	0.269629	0.496441	0.673857	0.435841	0.460871	-0.18869	-0.741945	0.0949306	-0.64613	-0.376501	-1.05909	-0.562649	-0.462965	0.210892	-0.931881	-0.49604	-0.8911	-0.430229	-1.6702	-1.85889	PF3D7_1016300	225	T	___1	AAS(0.391)NQET(0.609)LTSADPEGQIMR	7	RSNNEVKIRAASNQETLTSADPEGQIMREYA	PF10_0159
PF3D7_1467900		rab GTPase activator, putative	No	0.83637	0.33855	0.16633	0.58792	0.42472	-0.28015	0.30091	-4.00513	-3.16876	-3.32813	-2.98958	-2.68621	-2.51988	-3.29574	-2.70782	-3.01452	-2.5898	-2.11181	-2.39196	-2.76185	-2.46094	PF3D7_1467900	515	T	___1	TLNDDMES(0.5)FT(0.5)LHK	10	NYSNEKTLNDDMESFTLHKGSSYNRTKSFFK	PF14_0647
PF3D7_0113200		Plasmodium exported protein, unknown function	Yes	0.831255	0.128048	0.28555	0.750878	0.350979	0.380708	0.183151	-0.414335	0.41692	0.17461	0.302658	-2.55389	-2.26834	-0.852606	-0.101728	-0.69105	-0.340071	-0.500509	-0.119801	-0.372511	-0.18936	PF3D7_0113200	190	S	___2	NQS(0.052)IS(0.91)S(0.038)NNNNNNNKEEEEECTK	5	DKRNISISNKRNQSISSNNNNNNNKEEEEEC	MAL1P3.08;PFA0630c
PF3D7_0113200		Plasmodium exported protein, unknown function	Yes	0.831255	0.128048	0.28555	0.750878	0.350979	0.380708	0.183151	-0.414335	0.41692	0.17461	0.302658	-2.55389	-2.26834	-0.852606	-0.101728	-0.69105	-0.340071	-0.500509	-0.119801	-0.372511	-0.18936	PF3D7_0113200	191	S	___2	NQS(0.187)IS(0.909)S(0.904)NNNNNNNKEEEEECTK	6	KRNISISNKRNQSISSNNNNNNNKEEEEECT	MAL1P3.08;PFA0630c
PF3D7_0702300	STARP	sporozoite threonine and asparagine-rich protein	Yes	0.83088	0.51466	0.3883	0.369135	0.37095	0.588	0.39653	2.14105	2.97193	2.37893	2.89359	2.74498	3.13328	0.447525	0.81666	2.52867	2.89962	2.31638	2.90438	2.11603	2.51256	PF3D7_0702300	143	S	___1	LTGNNSTTINTNSTENT(0.006)S(0.99)AT(0.003)K	18	GNNSTTINTNSTENTSATKKVTENVITNQIL	PF07_0006
PF3D7_1149000	Pf332	antigen 332, DBL-like protein	Yes	0.829855	0.522248	0.341759	0.742045	0.319069	0.51413	0.341851	0.104715	0.93457	0.121841	0.644089	0.471281	0.81304	0.332365	1.07441	-0.11384	0.205229	0.0865803	0.60071	0.24188	0.583731	PF3D7_1149000	768	S	___1	SVSEEIPVEEKS(0.996)VS(0.004)EEIPVEEK	12	VEEKSVSEEIPVEEKSVSEEIPVEEKSVSEE	PF11_0506;PF11_0507
PF3D7_0202400	PTEF	gamete antigen 27/25, putative	No	0.82877	0.32695	0.59206	0.90911	0.5458	0.5408	0.33917	-2.4123	-1.58353	-1.57724	-1.25029	-2.11881	-1.52675	-1.35427	-0.44516	-1.79745	-1.25165	-1.66554	-1.12474	-2.06686	-1.72769	PF3D7_0202400	45	T	___1	KYT(0.999)YGDNLQLGASTINTPK	3	PFLSQNKDSFEEKKYTYGDNLQLGASTINTP	PF02_0024;PFB0115w
PF3D7_0501300	SBP1	skeleton-binding protein 1	Yes	0.82726	0.24366	0.48059	0.60812	0.23474	-0.14393	0.11356	-2.11485	-1.28759	-1.60468	-1.36102	-1.43913	-0.95854	-1.71	-1.10188	-1.36581	-1.13107	-1.09789	-1.24182	-3.86866	-3.7551	PF3D7_0501300	328	S	___1	TQQNPQQNAQQNTQQNT(0.009)QQQS(0.404)T(0.476)T(0.111)KS(0.833)T(0.142)T(0.025)K	25	QQNTQQNTQQQSTTKSTTKTVARET______	MAL5P1.14;PFE0065w
PF3D7_1436300	PTEX150	translocon component PTEX150	No	0.82715	0.24426	0.16803	0.51146	0.24287	0.33769	0.09534	-2.30537	-1.47822	-2.38706	-2.1428	-2.22524	-2.05721	-1.98689	-1.47543	-2.57133	-2.32846	-2.40553	-2.06784	-2.52857	-2.43323	PF3D7_1436300	423	S	___1	GQNNNEEDDEEGGDDDDY(0.413)DDKS(0.573)FVVNS(0.014)K	22	EDDEEGGDDDDYDDKSFVVNSKYADNSFEDK	PF14_0344;Pf112
PF3D7_1207000		conserved Plasmodium protein, unknown function	No	0.826815	0.59287	0.67206	0.936936	0.700761	0.70903	0.709931	0.749775	1.57659	0.60125	1.19412	0.55835	1.23041	0.537834	1.47477	0.477169	1.17793	0.52631	1.23534	0.368969	1.0789	PF3D7_1207000	1392	S	___1	YDLDEREES(1)LNNDK	9	EQIEKRKYDLDEREESLNNDKAQMEESRKIF	2277.t00071;MAL12P1.70;PFL0350c
PF3D7_1149000	Pf332	antigen 332, DBL-like protein	Yes	0.82485	0.18843	0.47625	0.15805	0.25765	0.12418	0.27807	-4.34257	-3.51772	-4.25599	-4.06756	-4.28733	-3.81108	-4.61349	-4.45544	-4.17354	-3.91589	-4.62305	-4.49887	-4.95883	-4.68076	PF3D7_1149000	4847	S	___1	STTQEILEET(0.5)QS(0.5)VNEEIVEEER	12	EEEKSTTQEILEETQSVNEEIVEEERDTDEV	PF11_0506;PF11_0507
PF3D7_1149000	Pf332	antigen 332, DBL-like protein	Yes	0.82485	0.18843	0.47625	0.15805	0.25765	0.12418	0.27807	-4.34257	-3.51772	-4.25599	-4.06756	-4.28733	-3.81108	-4.61349	-4.45544	-4.17354	-3.91589	-4.62305	-4.49887	-4.95883	-4.68076	PF3D7_1149000	4845	T	___1	STTQEILEET(0.5)QS(0.5)VNEEIVEEER	10	DIEEEKSTTQEILEETQSVNEEIVEEERDTD	PF11_0506;PF11_0507
PF3D7_0532300		Plasmodium exported protein (PHISTb), unknown function	Yes	0.81642	-0.09999	0.05023	0.971072	0.509939	0.27576	0.11437	-1.50129	-0.68487	-1.24813	-1.34812	-0.318029	-0.267799	-1.12303	-0.151958	-1.4717	-0.961761	-1.04922	-0.77346	-2.89573	-2.78136	PF3D7_0532300	346	T	___1	NYSTHENT(0.963)Y(0.037)PTLK	8	FKNGKFLKNYSTHENTYPTLKTLLEKYAITD	MAL5P1.314;PFE1600w
PF3D7_1476300		Plasmodium exported protein (PHISTb), unknown function	Yes	0.81523	0.3146	0.11379	0.42379	0.5905	0.51708	-0.25097	-2.17644	-1.36121	-1.95141	-1.63681	-2.32593	-2.21214	-2.50933	-2.08554	-2.44761	-1.85711	-2.59907	-2.08199	-2.24433	-2.4953	PF3D7_1476300	352	S	___2	HIDS(1)DVDDAETEWYDTK	4	NYYLEENTNEIKHIDSDVDDAETEWYDTKLL	PF14_0732
PF3D7_1476300		Plasmodium exported protein (PHISTb), unknown function	Yes	0.81523	0.3146	0.11379	0.42379	0.5905	0.51708	-0.25097	-2.17644	-1.36121	-1.95141	-1.63681	-2.32593	-2.21214	-2.50933	-2.08554	-2.44761	-1.85711	-2.59907	-2.08199	-2.24433	-2.4953	PF3D7_1476300	359	T	___2	HIDS(0.999)DVDDAET(0.991)EWY(0.01)DTK	11	TNEIKHIDSDVDDAETEWYDTKLLLDEKKKE	PF14_0732
PF3D7_0500800	MESA	mature parasite-infected erythrocyte surface antigen	Yes	0.81131	0.3305	0.38298	0.43022	0.43528	0.26991	0.62075	-2.10942	-1.29811	-1.78429	-1.45379	-1.83718	-1.4542	-1.58863	-1.15841	-2.19428	-1.759	-1.45993	-1.19002	-2.1121	-1.49135	PF3D7_0500800	357	S	___1	VSGPYENSENSNVT(0.002)S(0.029)ES(0.823)EET(0.147)KK	17	SGPYENSENSNVTSESEETKKLAEKEENEGE	MAL5P1.9;PFE0040c
PF3D7_0402400	GEXP18	Plasmodium exported protein, unknown function	Yes	0.80899	0.32317	0.48145	0.71071	0.43563	0.55754	0.24045	1.1743	1.98329	1.04792	1.37109	1.25505	1.7365	1.29855	2.00926	1.32155	1.75718	0.81432	1.37186	1.15149	1.39194	PF3D7_0402400	117	S	___1	DHIS(1)ENVK	4	EKYVDNYEYNVRDHISENVKLGNDSIGDNIS	MAL4P1.23;PFD0115c
PF3D7_1450100	SRP54	signal recognition particle subunit SRP54	No	0.80782	0.05485	-0.46875	-0.12774	-0.17712	-0.08738	-0.672	-4.12718	-3.31936	-3.06351	-3.00866	-3.14792	-3.61667	-3.38562	-3.51336	-3.04741	-3.22453	-3.22615	-3.31353	-2.5583	-3.2303	PF3D7_1450100	4	T	___1	VLT(0.999)ELGTQITNAFR	3	____________MVLTELGTQITNAFRKLQT	PF14_0477
PF3D7_1038600		Plasmodium exported protein, unknown function	Yes	0.807275	0.458088	0.451719	0.987406	0.35832	0.669918	0.298121	-0.319614	0.487661	0.0550308	0.513119	0.216351	0.66807	0.267164	1.25457	-0.0532608	0.305059	0.0150013	0.684919	-0.0277596	0.270361	PF3D7_1038600	460	S	___1	TYYDT(0.047)LS(0.922)IT(0.03)HK	7	LGAKNYYKKTYYDTLSITHKNIKKIKKKNNI	PF10_0376
PF3D7_1302100	G27/25	gamete antigen 27/25	No	0.80458	0.591099	1.11575	2.01082	0.80702	0.88649	0.39056	1.54078	2.34536	0.811501	1.4026	0.12022	1.23597	0.533985	2.5448	-0.0518303	0.75519	-0.0832291	0.803261	0.15345	0.54401	PF3D7_1302100	32	S	___1	FGNIYDYHYEHETHAPLS(1)PR	18	NIYDYHYEHETHAPLSPRIRKVGDIEFHACS	PF13_0011
PF3D7_1149000	Pf332	antigen 332, DBL-like protein	Yes	0.80062	0.6324	1.16773	0.27536	0.4118	0.80879	0.55154	-2.46381	-1.66319	-2.56084	-1.92844	-2.98807	-1.82034	-2.44796	-2.1726	-2.61053	-2.19873	-2.41797	-1.60918	-3.31123	-2.75969	PF3D7_1149000	1462	S	___2	S(0.008)VS(0.992)EEVLEEEGSTTEK	3	VASITEEVEEEEKSVSEEVLEEEGSTTEKVV	PF11_0506;PF11_0507
PF3D7_1149000	Pf332	antigen 332, DBL-like protein	Yes	0.80062	0.6324	1.16773	0.27536	0.4118	0.80879	0.55154	-2.46381	-1.66319	-2.56084	-1.92844	-2.98807	-1.82034	-2.44796	-2.1726	-2.61053	-2.19873	-2.41797	-1.60918	-3.31123	-2.75969	PF3D7_1149000	1471	S	___2	SVSEEVLEEEGS(0.983)T(0.017)TEK	12	EEEKSVSEEVLEEEGSTTEKVVKGSSTEVVV	PF11_0506;PF11_0507
PF3D7_0519800		EELM2 domain-containing protein, putative	No	0.799627	-0.0575	-0.34605	0.254177	0.394791	-0.167639	-0.343919	-0.307636	0.491991	1.36348	1.30598	0.661251	0.315201	0.724915	0.979092	0.722139	1.11693	0.51417	0.346531	1.07607	0.732151	PF3D7_0519800	247	S	___1	VS(1)KDLNLNNEYVYGTNLNFK	2	NLQNNVPHGRRKRKVSKDLNLNNEYVYGTNL	MAL5P1.199;PFE0995c
PF3D7_0500800	MESA	mature parasite-infected erythrocyte surface antigen	Yes	0.799	0.699	0.76159	0.80527	0.34157	0.57455	0.43544	2.37214	3.17114	2.08923	2.78823	2.32823	3.08982	2.84501	3.65028	1.41362	1.75519	2.50133	3.07588	2.09739	2.53283	PF3D7_0500800	355	S	___1	VSGPYENSENSNVT(0.001)S(0.999)ESEETK	15	KVSGPYENSENSNVTSESEETKKLAEKEENE	MAL5P1.9;PFE0040c
PF3D7_0702500		Plasmodium exported protein, unknown function	Yes	0.79861	0.64716	0.5725	0.82432	0.53116	0.48392	0.3609	2.96222	3.76083	3.25197	3.89913	3.32371	3.89621	3.46473	4.28905	3.06054	3.5917	3.43123	3.91515	2.00773	2.36863	PF3D7_0702500	164	S	___2	NS(0.108)S(0.892)QHS(1)VGS(0.989)HS(0.009)VS(0.001)S(0.001)QEHK	6	HLSGSNSDGRNSSQHSVGSHSVSSQEHKKEH	PF07_0008
PF3D7_0424500	FIKK4.1	serine/threonine protein kinase, FIKK family	Yes	0.79579	0.52329	-0.117609	0.76521	0.65445	0.53669	0.55758	2.62792	3.42371	2.87979	3.40308	-0.0787106	-0.19632	2.87279	3.638	2.74423	3.39868	2.94879	3.48548	2.57943	3.13701	PF3D7_0424500	163	S	___2	S(1)LS(1)IREDCNNK	1	HKENDVSLKKDQCKKSLSIREDCNNKNSKSY	MAL4P1.228;PFD1165w
PF3D7_0424500	FIKK4.1	serine/threonine protein kinase, FIKK family	Yes	0.79579	0.52329	-0.117609	0.76521	0.65445	0.53669	0.55758	2.62792	3.42371	2.87979	3.40308	-0.0787106	-0.19632	2.87279	3.638	2.74423	3.39868	2.94879	3.48548	2.57943	3.13701	PF3D7_0424500	165	S	___2	S(1)LS(1)IREDCNNK	3	ENDVSLKKDQCKKSLSIREDCNNKNSKSYNE	MAL4P1.228;PFD1165w
PF3D7_1149000	Pf332	antigen 332, DBL-like protein	Yes	0.7937	0.872778	0.659401	1.26961	0.24723	0.65102	0.3507	-1.35859	-0.56489	-0.30686	0.565918	-0.167891	0.49151	-0.166626	1.10298	-0.51358	-0.26635	0.0489311	0.699951	-0.30389	0.0468102	PF3D7_1149000	792	S	___1	S(0.108)VS(0.892)EEIPVEEKNVSEEIPVEEK	3	EKSVSEEIPVEEKSVSEEIPVEEKNVSEEIP	PF11_0506;PF11_0507
PF3D7_0532400	LyMP	lysine-rich membrane-associated PHISTb protein	Yes	0.79287	0.33392	0.29957	0.84659	0.50855	0.62544	0.24026	4.72899	5.52186	4.3407	4.67462	4.00538	4.30495	4.89428	5.74087	4.85406	5.36261	4.81073	5.43617	5.03199	5.27225	PF3D7_0532400	310	S	___1	RKS(1)NPNNEISLR	3	VSKLPKKKKLRNRRKSNPNNEISLRTYGQST	MAL5P1.315;PFE1605w
PF3D7_1478600	PTP3	EMP1-trafficking protein	Yes	0.78931	0.35344	0.282711	0.7766	0.51688	0.43213	0.51	2.30255	3.09186	0.94623	1.29967	-0.129271	0.15344	2.56908	3.34568	2.19758	2.71446	2.81767	3.2498	2.04594	2.55594	PF3D7_1478600	673	S	___1	NEKS(1)IPNK	4	SKLDTQNGKNEKNEKSIPNKLDSQNGKNEKN	PF14_0758
PF3D7_1149000	Pf332	antigen 332, DBL-like protein	Yes	0.787577	0.410078	0.770531	1.0859	0.660149	0.924471	-0.25731	-0.724976	0.0626011	-0.865309	-0.455231	-1.04047	-0.269939	-1.13532	-0.0494194	-1.1068	-0.446651	-1.49119	-0.566719	-2.0607	-2.31801	PF3D7_1149000	3087	S	___1	QGS(1)VIEEVVEEEISTTEEK	3	VQDGSGTNDFVGKQGSVIEEVVEEEISTTEE	PF11_0506;PF11_0507
PF3D7_1149000	Pf332	antigen 332, DBL-like protein	Yes	0.78181	0.59551	0.46577	0.76457	0.6555	1.02383	0.34286	-2.31756	-1.53575	-2.18214	-1.58663	-1.9605	-1.49473	-2.05004	-1.28547	-2.19325	-1.53775	-2.53572	-1.51189	-2.17849	-1.83563	PF3D7_1149000	4870	S	___1	VS(0.005)PS(0.995)EEVIEEQASTTEEFVEER	4	EERDTDEVLKEKVSPSEEVIEEQASTTEEFV	PF11_0506;PF11_0507
PF3D7_0111500		UMP-CMP kinase, putative	No	0.78024	0.45352	0.12412	-0.12272	0.04879	-0.19241	0.06079	-3.32213	-2.54189	-3.03007	-2.57655	-2.85603	-2.73191	-2.56522	-2.68794	-2.88088	-2.83209	-2.95626	-3.14867	-2.9757	-2.91491	PF3D7_0111500	132	T	___1	FDFT(0.586)HIS(0.414)AGDCLR	4	GKGTQCKLIQEKFDFTHISAGDCLREYLKKC	MAL1P2.40;PFA0555c
PF3D7_0708400	HSP90	heat shock protein 90	No	0.779385	0.505968	0.49321	0.833546	0.541559	0.65934	0.398011	0.298635	1.07802	0.46624	0.972208	0.52364	1.01685	0.500404	1.33395	0.45298	0.994539	0.23332	0.89266	0.542089	0.9401	PF3D7_0708400	349	S	___1	HFS(1)VEGQLEFK	3	SLTNDWEDHLAVKHFSVEGQLEFKALLFIPK	PF07_0029
PF3D7_0616900		conserved Plasmodium protein, unknown function	No	0.77849	0.24423	0.45276	0.17389	0.19676	-0.0691	0.76203	-4.82781	-4.04932	-4.76125	-4.51702	-4.60844	-4.15568	-4.32347	-4.14958	-4.33642	-4.13966	-3.71201	-3.78111	-4.85127	-4.08924	PF3D7_0616900	1023	S	___2	FFSLYS(0.613)S(0.386)PS(0.001)PQYDNDEKNIYNNTNER	6	HFNIDEDNKKFFSLYSSPSPQYDNDEKNIYN	2270.t00057;MAL6P1.257;PFF0820w
PF3D7_1149000	Pf332	antigen 332, DBL-like protein	Yes	0.77841	0.60507	0.43524	0.5874	0.69158	0.65842	0.03301	1.71438	2.49279	0.76902	1.37409	1.08447	1.51971	1.32902	1.91642	1.30847	2.00005	0.39884	1.05726	-1.16953	-1.13652	PF3D7_1149000	4500	T	___1	QVS(0.263)VT(0.737)EDIVEK	5	EETATEEIVEKQVSVTEDIVEKEGSVNEEII	PF11_0506;PF11_0507
PF3D7_0401800	PfD80	Plasmodium exported protein (PHISTb), unknown function	Yes	0.77579	0.48099	0.54895	0.73026	0.71082	0.73862	0.09864	3.84496	4.62075	3.31163	3.79262	3.08011	3.62906	3.17936	3.90962	3.19449	3.90531	2.53142	3.27004	1.92175	2.02039	PF3D7_0401800	280	T	___1	LPS(0.065)T(0.935)GSTIR	4	PSTGSTSGSTTRLPSTGSTIRFPSTGSSRLE	MAL4P1.16;PFD0080c
PF3D7_1345400		conserved Plasmodium protein, unknown function	No	0.775	0.2706	0.13896	-0.42794	-0.31869	-0.45464	0.01789	-3.70057	-2.92557	-3.11442	-2.84382	-3.10865	-2.96969	-2.86994	-3.29788	-2.95295	-3.27164	-2.82631	-3.28095	-3.27793	-3.26004	PF3D7_1345400	21	S	___2	IIFS(0.495)S(0.496)DDEES(0.528)NDDS(0.402)EQINT(0.077)DNIS(0.002)K	10	KNKRNKIIFSSDDEESNDDSEQINTDNISKN	MAL13P1.226
PF3D7_0731100	PTP2	EMP1-trafficking protein	Yes	0.77272	0.02762	0.2498	0.69803	0.28225	-0.0145	0.27088	-2.38552	-1.6128	-2.21927	-2.19165	-2.83348	-2.58368	-2.57638	-1.87835	-2.4208	-2.13855	-2.17704	-2.19154	-2.59563	-2.32475	PF3D7_0731100	159	S	___1	APS(0.986)GS(0.014)LFNSPENFQGGYK	3	NKQDSFENEGYYRAPSGSLFNSPENFQGGYK	MAL7P1.172
PF3D7_0622200		radical SAM protein, putative	No	0.77232	0.96081	-0.02218	1.00346	0.50517	-1.17091	-0.15122	-4.91351	-4.14119	-4.75472	-3.79391	-3.85978	-3.88196	-5.1621	-4.15864	-4.44198	-3.93681	-4.27154	-5.44245	-4.39537	-4.54659	PF3D7_0622200	146	S	___2	NIDIFNNDNNFS(0.5)S(0.5)AEDS(0.5)IS(0.5)DVEDINNLNER	12	PINKNIDIFNNDNNFSSAEDSISDVEDINNL	2270.t00111;MAL6P1.206;PFF1070c
PF3D7_0622200		radical SAM protein, putative	No	0.77232	0.96081	-0.02218	1.00346	0.50517	-1.17091	-0.15122	-4.91351	-4.14119	-4.75472	-3.79391	-3.85978	-3.88196	-5.1621	-4.15864	-4.44198	-3.93681	-4.27154	-5.44245	-4.39537	-4.54659	PF3D7_0622200	147	S	___2	NIDIFNNDNNFS(0.5)S(0.5)AEDS(0.5)IS(0.5)DVEDINNLNER	13	INKNIDIFNNDNNFSSAEDSISDVEDINNLN	2270.t00111;MAL6P1.206;PFF1070c
PF3D7_0622200		radical SAM protein, putative	No	0.77232	0.96081	-0.02218	1.00346	0.50517	-1.17091	-0.15122	-4.91351	-4.14119	-4.75472	-3.79391	-3.85978	-3.88196	-5.1621	-4.15864	-4.44198	-3.93681	-4.27154	-5.44245	-4.39537	-4.54659	PF3D7_0622200	151	S	___2	NIDIFNNDNNFS(0.5)S(0.5)AEDS(0.5)IS(0.5)DVEDINNLNER	17	IDIFNNDNNFSSAEDSISDVEDINNLNERTN	2270.t00111;MAL6P1.206;PFF1070c
PF3D7_0622200		radical SAM protein, putative	No	0.77232	0.96081	-0.02218	1.00346	0.50517	-1.17091	-0.15122	-4.91351	-4.14119	-4.75472	-3.79391	-3.85978	-3.88196	-5.1621	-4.15864	-4.44198	-3.93681	-4.27154	-5.44245	-4.39537	-4.54659	PF3D7_0622200	153	S	___2	NIDIFNNDNNFS(0.016)S(0.016)AEDS(0.067)IS(0.902)DVEDINNLNER	19	IFNNDNNFSSAEDSISDVEDINNLNERTNYK	2270.t00111;MAL6P1.206;PFF1070c
PF3D7_0401800	PfD80	Plasmodium exported protein (PHISTb), unknown function	Yes	0.77	0.44371	0.4829	0.79761	0.54525	0.72955	0.22169	2.80243	3.57243	2.38753	2.83124	2.30756	2.79046	2.18125	2.97886	2.28355	2.8288	1.83877	2.56832	1.0332	1.25489	PF3D7_0401800	279	S	___1	LPS(0.983)T(0.017)GSTIR	3	SPSTGSTSGSTTRLPSTGSTIRFPSTGSSRL	MAL4P1.16;PFD0080c
PF3D7_1008100	PHD1	zinc finger protein, putative	No	0.768586	0.02141	-0.01086	0.48544	0.00581	0.12256	-0.23158	0.625124	1.39371	1.8718	1.89321	1.63278	1.62192	1.61569	2.10113	1.50612	1.51193	1.65084	1.7734	1.58304	1.35146	PF3D7_1008100	1580	S	___1	NYNS(0.624)NKKET(0.188)T(0.188)DDEDEQQDQHLQQK	4	MHSFCSGSKNIKNYNSNKKETTDDEDEQQDQ	PF10_0079
PF3D7_1435600		conserved Plasmodium protein, unknown function	No	0.767966	0.638849	0.68993	0.674794	0.737528	0.53118	0.443972	0.362024	1.12999	0.2127	0.851549	0.199541	0.889471	0.384886	1.05968	0.107651	0.845179	0.42823	0.95941	0.218439	0.662411	PF3D7_1435600	1735	S	___1	TLSDNS(0.992)PT(0.008)K	6	TNKNEKKIIRTLSDNSPTKKGVNNIYTQTKV	PF14_0337
PF3D7_0112200	MRP1	multidrug resistance-associated protein 1	No	0.76686	0.35532	0.66041	0.60411	0.679099	0.4977	0.52064	-1.52571	-0.75885	-1.48249	-1.12717	-1.81651	-1.1561	-1.66041	-1.0563	-1.56693	-0.887831	-1.68137	-1.18367	-1.62566	-1.10502	PF3D7_0112200	236	S	___2	FS(0.01)S(0.984)QT(0.006)EIDEISR	3	LQNPDAFYNTYRKFSSQTEIDEISRDFLSIG	MAL1P3.03;PFA0590w
PF3D7_0112200	MRP1	multidrug resistance-associated protein 1	No	0.76686	0.35532	0.66041	0.60411	0.679099	0.4977	0.52064	-1.52571	-0.75885	-1.48249	-1.12717	-1.81651	-1.1561	-1.66041	-1.0563	-1.56693	-0.887831	-1.68137	-1.18367	-1.62566	-1.10502	PF3D7_0112200	238	T	___2	FS(0.001)S(0.004)QT(0.995)EIDEISR	5	NPDAFYNTYRKFSSQTEIDEISRDFLSIGKN	MAL1P3.03;PFA0590w
PF3D7_1026000		conserved Plasmodium protein, unknown function	No	0.76619	-0.24351	-0.41581	0.09439	-0.03572	-0.27103	-0.37332	-2.99471	-2.22852	-2.52804	-2.77155	-2.36175	-2.77756	-2.61773	-2.52334	-2.88525	-2.92097	-2.87786	-3.14889	-2.62715	-3.00047	PF3D7_1026000	339	S	___1	IDDIIAIVEKEES(1)IKQK	13	REKIDDIIAIVEKEESIKQKQKQKMLQKTKQ	PF10_0257
PF3D7_0402400	GEXP18	Plasmodium exported protein, unknown function	Yes	0.765731	0.33281	0.379841	0.35155	0.4003	0.21415	0.46044	-1.4507	-0.684969	-1.71956	-1.38675	-1.27989	-0.900049	-1.28456	-0.93301	-1.46745	-1.06715	-1.6215	-1.40735	-1.52715	-1.06671	PF3D7_0402400	126	S	___1	LGNDS(1)IGDNISIVDFNGENNVEVTFPDDNINEK	5	NVRDHISENVKLGNDSIGDNISIVDFNGENN	MAL4P1.23;PFD0115c
PF3D7_1302000	PTP6	EMP1-trafficking protein	Yes	0.76513	0.35755	0.46265	0.37244	0.00051	-0.15381	-0.0614	-3.39178	-2.62665	-3.28816	-2.93061	-2.96147	-2.49882	-3.422	-3.04956	-2.95969	-2.95918	-2.59061	-2.74442	-2.97789	-3.03929	PF3D7_1302000	114	S	___1	QSHVTNSATEVAAQENNS(0.5)T(0.5)EEK	18	HVTNSATEVAAQENNSTEEKKNNPPVEQQQQ	PF13_0076
PF3D7_1302000	PTP6	EMP1-trafficking protein	Yes	0.76513	0.35755	0.46265	0.37244	0.00051	-0.15381	-0.0614	-3.39178	-2.62665	-3.28816	-2.93061	-2.96147	-2.49882	-3.422	-3.04956	-2.95969	-2.95918	-2.59061	-2.74442	-2.97789	-3.03929	PF3D7_1302000	115	T	___1	QSHVTNSATEVAAQENNS(0.5)T(0.5)EEK	19	VTNSATEVAAQENNSTEEKKNNPPVEQQQQQ	PF13_0076
PF3D7_0500800	MESA	mature parasite-infected erythrocyte surface antigen	Yes	0.764305	0.71176	0.629589	0.778335	0.443119	0.877979	0.552191	0.380505	1.14481	0.34783	1.05959	0.237831	0.86742	0.200026	0.978361	0.0678596	0.510979	0.141281	1.01926	0.0161495	0.56834	PF3D7_0500800	454	T	___1	NIET(1)DDEEET(1)LVVKDDAK	10	NFLCNKNIETDDEEETLVVKDDAKKKHKFLR	MAL5P1.9;PFE0040c
PF3D7_0702400	SEMP1	small exported membrane protein 1	Yes	0.76307	0.6921	0.82228	0.94427	0.32799	0.68304	-0.02388	4.53876	5.30183	4.68446	5.37656	4.84669	5.66897	4.79987	5.74414	4.42915	4.75714	4.74133	5.42437	3.09261	3.06873	PF3D7_0702400	31	S	___1	FNPTRNPS(1)QSGPYR	8	AANTQEKKFNPTRNPSQSGPYRHHGPQGRTP	PF07_0007
PF3D7_0506900	ROM4	rhomboid protease ROM4	No	0.761671	0.79644	0.513921	0.637747	0.519099	0.285561	0.09177	-1.24477	-0.483099	-1.14187	-0.34543	-0.90962	-0.395699	-0.731026	-0.0932789	-1.13572	-0.616621	-0.83577	-0.550209	-1.64058	-1.54881	PF3D7_0506900	180	S	___1	S(0.5)CS(0.5)INDDERK	1	EKKESFSINEDETKKSCSINDDERKISIFSN	MAL5P1.70;PFE0340c
PF3D7_1149100		Plasmodium exported protein, unknown function	Yes	0.760416	0.43734	0.36577	0.605954	0.375789	0.617849	0.190491	0.172054	0.93247	0.67049	1.10783	0.54319	0.90896	0.768206	1.37416	0.402451	0.77824	0.424311	1.04216	0.13146	0.321951	PF3D7_1149100;PF3D7_1149100	373;374	S	___1	KDVVEGCS(0.972)T(0.028)GMCPLR	8	KENCESCKKDVVEGCSTGMCPLRNNDTKKEN	PF11_0508;PF3D7_1149100.1;PF3D7_1149100.2
PF3D7_0830500	TryThrA	sporozoite and liver stage tryptophan-rich protein, putative	Yes	0.75949	0.27852	0.09238	0.0338	0.28092	-0.99025	-0.06952	-4.00866	-3.24917	-4.29278	-4.01426	-3.75893	-3.66655	-4.11718	-4.08338	-4.28365	-4.00273	-3.29436	-4.28461	-4.07995	-4.14947	PF3D7_0830500	434	S	___1	S(0.5)DLES(0.5)IMEEDENEYNSFDENEEENDEK	1	KKKKILKFFPLFNYKSDLESIMEEDENEYNS	PF08_0003
PF3D7_1328500		alpha/beta-hydrolase, putative	No	0.75496	0.29415	0.39999	0.90106	0.45995	0.55678	0.32572	1.08084	1.8358	1.3704	1.66455	1.33358	1.73357	1.35652	2.25758	1.16411	1.62406	1.0546	1.61138	1.20452	1.53024	PF3D7_1328500	922	S	___1	FFENS(1)YIK	5	SEDYSNQTCNKFFENSYIKLSKSTLKNEKEL	PF13_0153
PF3D7_1426700	PEPC	phosphoenolpyruvate carboxylase	No	0.75493	0.5018	0.27469	0.33767	-0.78773	0.79829	-0.43052	-4.23071	-3.47578	-4.39458	-3.89278	-3.64905	-3.37436	-4.16553	-3.82786	-3.79235	-4.58008	-4.9176	-4.11931	-3.99739	-4.42791	PF3D7_1426700	1086	S	___2	FHPLIELHPY(0.029)VFPQS(0.628)ET(0.628)ENES(0.628)FFDY(0.088)VK	15	KFHPLIELHPYVFPQSETENESFFDYVKTID	PF14_0246
PF3D7_1426700	PEPC	phosphoenolpyruvate carboxylase	No	0.75493	0.5018	0.27469	0.33767	-0.78773	0.79829	-0.43052	-4.23071	-3.47578	-4.39458	-3.89278	-3.64905	-3.37436	-4.16553	-3.82786	-3.79235	-4.58008	-4.9176	-4.11931	-3.99739	-4.42791	PF3D7_1426700	1092	S	___2	FHPLIELHPY(0.029)VFPQS(0.628)ET(0.628)ENES(0.628)FFDY(0.088)VK	21	ELHPYVFPQSETENESFFDYVKTIDSNFERI	PF14_0246
PF3D7_1426700	PEPC	phosphoenolpyruvate carboxylase	No	0.75493	0.5018	0.27469	0.33767	-0.78773	0.79829	-0.43052	-4.23071	-3.47578	-4.39458	-3.89278	-3.64905	-3.37436	-4.16553	-3.82786	-3.79235	-4.58008	-4.9176	-4.11931	-3.99739	-4.42791	PF3D7_1426700	1088	T	___2	FHPLIELHPY(0.029)VFPQS(0.628)ET(0.628)ENES(0.628)FFDY(0.088)VK	17	HPLIELHPYVFPQSETENESFFDYVKTIDSN	PF14_0246
PF3D7_0817300		conserved Plasmodium protein, unknown function	No	0.753015	0.19197	0.34523	0.584234	0.379659	0.48774	0.201292	0.574055	1.32707	0.85507	1.04704	0.647211	0.992441	0.768206	1.35244	0.745741	1.1254	0.51214	0.99988	0.714329	0.915621	PF3D7_0817300	166	S	___1	NIIVIDDSLPNNS(0.148)NS(0.74)T(0.112)FDDKEK	15	KNIIVIDDSLPNNSNSTFDDKEKTETNNRIN	PF08_0060
PF3D7_0402100		Plasmodium exported protein (PHISTb), unknown function	Yes	0.75301	0.50084	0.72601	0.86542	0.76042	0.8857	0.51726	1.21046	1.96347	1.3909	1.89174	1.3058	2.03181	1.47465	2.34007	1.18989	1.95031	0.99556	1.88126	1.17107	1.68833	PF3D7_0402100	94	S	___2	QVPKEES(1)ENS(1)NNDIFEYYK	7	NYGEGSLLKQVPKEESENSNNDIFEYYKTLF	MAL4P1.19;PFD0095c
PF3D7_0402100		Plasmodium exported protein (PHISTb), unknown function	Yes	0.75301	0.50084	0.72601	0.86542	0.76042	0.8857	0.51726	1.21046	1.96347	1.3909	1.89174	1.3058	2.03181	1.47465	2.34007	1.18989	1.95031	0.99556	1.88126	1.17107	1.68833	PF3D7_0402100	97	S	___2	QVPKEES(1)ENS(1)NNDIFEYYK	10	EGSLLKQVPKEESENSNNDIFEYYKTLFNNV	MAL4P1.19;PFD0095c
PF3D7_1023000		conserved Plasmodium membrane protein, unknown function	No	0.75239	0.26322	-0.03683	0.15765	0.45421	-0.159	0.12989	-3.061	-2.30861	-2.38578	-2.12256	-2.1368	-2.17363	-2.3006	-2.14295	-2.50556	-2.05135	-1.67829	-1.83729	-2.04554	-1.91565	PF3D7_1023000	219	S	___1	IEANDENIT(0.172)NS(0.119)LS(0.671)ES(0.038)FINK	13	ENKIEANDENITNSLSESFINKLVFCSNTPN	PF10_0223
PF3D7_0818900	HSP70	heat shock protein 70	No	0.75182	0.54299	0.51037	0.94691	0.66055	0.71432	0.38746	2.37116	3.12298	2.35701	2.9	2.51643	3.0268	2.453	3.39991	2.50542	3.16597	2.22041	2.93473	2.61885	3.00631	PF3D7_0818900	554	S	___1	NS(1)LENYCYGVK	2	KAEDEENRKRIEARNSLENYCYGVKSSLEDQ	PF08_0054
PF3D7_0401800	PfD80	Plasmodium exported protein (PHISTb), unknown function	Yes	0.7514	0.28412	0.53774	0.80183	0.34938	0.50152	-0.02373	3.7856	4.537	3.05055	3.33467	2.64597	3.18371	3.08356	3.88539	3.28111	3.63049	2.82186	3.32338	3.12911	3.10538	PF3D7_0401800	288	S	___1	FPS(0.991)T(0.009)GSSR	3	STTRLPSTGSTIRFPSTGSSRLEDYEKEGSN	MAL4P1.16;PFD0080c
PF3D7_0202000	KAHRP	knob-associated histidine-rich protein	Yes	0.750797	-0.19846	-0.196	0.99557	0.71446	-0.15765	-1.75638	0.0407639	0.791561	3.54096	3.3425	2.06239	1.86639	1.94449	2.94006	1.47155	2.18601	2.14384	1.98619	1.84764	0.0912609	PF3D7_0202000	578	S	___1	EATKEAS(0.963)T(0.033)S(0.004)KGATK	7	ATKEASTSKEATKEASTSKGATKEASTTEGA	PF02_0020;PFB0100c
PF3D7_0424500	FIKK4.1	serine/threonine protein kinase, FIKK family	Yes	0.749801	0.51133	-0.17079	0.843901	0.56203	0.857961	0.4616	-1.67311	-0.923309	-1.58751	-1.07618	-3.39699	-3.56778	-1.31823	-0.474329	-1.63154	-1.06951	-1.49409	-0.636129	-1.70026	-1.23866	PF3D7_0424500	154	S	___1	HKENDVS(1)LK	7	EDKFNKKNKHKENDVSLKKDQCKKSLSIRED	MAL4P1.228;PFD1165w
PF3D7_1149000	Pf332	antigen 332, DBL-like protein	Yes	0.746426	0.655148	0.604031	0.917875	0.65484	0.758419	0.34713	-0.342806	0.40362	-0.272999	0.382149	0.28557	0.889601	0.00726509	0.92514	-1.14891	-0.49407	-0.481699	0.27672	-0.93483	-0.5877	PF3D7_1149000	2572	S	___1	DVSPTEDFVEQTDS(0.999)VT(0.001)EK	14	VKDVSPTEDFVEQTDSVTEKVIEQEGSNTEV	PF11_0506;PF11_0507
PF3D7_1347200	NT1	nucleoside transporter 1	No	0.74596	-0.29964	-0.47312	0.16661	0.17139	-0.18683	-0.58821	2.87092	3.61688	4.57095	4.27131	3.68424	3.21112	3.84335	4.00996	3.8587	4.03009	3.58131	3.39448	4.24826	3.66005	PF3D7_1347200	7	S	___2	S(0.96)T(0.96)GKES(0.96)S(0.087)KAY(0.034)ADIESR	6	_________MSTGKESSKAYADIESRGDYKD	PF13_0252
PF3D7_1347200	NT1	nucleoside transporter 1	No	0.74596	-0.29964	-0.47312	0.16661	0.17139	-0.18683	-0.58821	2.87092	3.61688	4.57095	4.27131	3.68424	3.21112	3.84335	4.00996	3.8587	4.03009	3.58131	3.39448	4.24826	3.66005	PF3D7_1347200	2	S	___2	S(0.999)T(0.999)GKES(0.874)S(0.128)KAYADIESR	1	______________MSTGKESSKAYADIESR	PF13_0252
PF3D7_0202000	KAHRP	knob-associated histidine-rich protein	Yes	0.74485	-0.18339	-0.07618	0.42717	0.20562	-0.01574	-0.47872	1.9859	2.73075	3.33522	3.15183	2.92978	2.8536	2.78115	3.20832	2.79853	3.00415	2.6525	2.63676	2.81991	2.34119	PF3D7_0202000	600	T	___2	GAS(0.001)T(0.02)T(0.974)AGS(0.005)TTGATTGANAVQSK	5	KEASTTEGATKGASTTAGSTTGATTGANAVQ	PF02_0020;PFB0100c
PF3D7_1128600	NOT2	CCR4-NOT transcription complex subunit 2, putative	No	0.742396	0.738848	0.977001	0.773084	0.6353	0.54566	0.607262	-0.347466	0.39493	-0.814579	-0.0757313	-0.79492	0.182081	-0.695604	0.0774803	-0.840601	-0.205301	-0.483629	0.0620308	-0.790661	-0.183399	PF3D7_1128600	341	S	___1	ILS(1)CEEEGEEEK	3	DILKSGDILKNNKILSCEEEGEEEKNELSLE	PF11_0297
PF3D7_0424600		Plasmodium exported protein (PHISTb), unknown function	Yes	0.7419	0.51703	0.308271	0.75085	0.67935	0.83678	0.38933	2.20676	2.94866	1.59155	2.10858	0.55069	0.858961	1.88568	2.63653	1.43473	2.11408	1.56437	2.40115	1.6794	2.06873	PF3D7_0424600	124	T	___1	LNT(1)IGNLFEGEK	3	VIGSTFMLPNENRLNTIGNLFEGEKYNILED	MAL4P1.229;PFD1170c
PF3D7_1200700	ACS7	acyl-CoA synthetase	Yes	0.738806	-0.0461	-0.29487	0.46189	0.628059	-0.044691	-0.157549	-0.217966	0.52084	1.41123	1.36513	0.792181	0.497311	1.02839	1.49028	0.577681	1.20574	0.854601	0.80991	1.00148	0.843931	PF3D7_1200700	779	S	___1	S(0.208)GS(0.792)KADIK	3	KDDIKSGSKDDIKSGSKADIKSGSKDDIKSG	2277.t00007;MAL12P1.7;PFL0035c
PF3D7_0831700	HSP70x	heat shock protein 70	Yes	0.73804	0.35726	0.61143	-0.1163	-0.1251	-0.88906	-0.41526	-5.20395	-4.46591	-4.46728	-4.11002	-4.55015	-3.93872	-4.1391	-4.2554	-4.46022	-4.58532	-5.45687	-6.34593	-4.08659	-4.50185	PF3D7_0831700	417	S	___1	AINPDEAVAYGAAVQAAILS(0.006)GDQS(0.19)S(0.804)AVK	25	YGAAVQAAILSGDQSSAVKDLLLLDVCPLSL	MAL7P1.228
PF3D7_1149000	Pf332	antigen 332, DBL-like protein	Yes	0.73558	0.830358	0.40466	0.809452	0.66436	1.09454	0.34739	-1.85839	-1.12281	-1.78697	-0.956612	-1.60238	-1.19772	-1.59337	-0.783918	-2.0609	-1.39654	-2.19842	-1.10388	-1.69952	-1.35213	PF3D7_1149000	2337	T	___1	S(0.075)AT(0.925)EDLVEEEAS(0.908)VT(0.092)EK	3	ERSVTEKPVEVERSATEDLVEEEASVTEKVS	PF11_0506;PF11_0507
PF3D7_1149000	Pf332	antigen 332, DBL-like protein	Yes	0.735225	0.755518	0.706371	0.757387	0.71567	0.89561	0.42387	-0.0240154	0.71121	-0.384739	0.370779	-0.37916	0.327211	-0.0499058	0.707481	-1.33045	-0.61478	-0.86902	0.0265903	-0.363211	0.0606594	PF3D7_1149000	1389	S	___1	EAS(0.991)IT(0.009)EEVEQIEPVTGK	3	IEREGSINEDIVKEASITEEVEQIEPVTGKV	PF11_0506;PF11_0507
PF3D7_1468100		conserved Plasmodium protein, unknown function	No	0.73476	-0.43673	-0.24034	-0.58054	0.89694	-0.43991	0.04064	-4.54259	-3.80783	-3.99822	-4.43495	-4.2367	-4.47704	-4.08201	-4.66255	-5.06058	-4.16364	-3.57442	-4.01433	-3.81734	-3.7767	PF3D7_1468100	40	S	___1	NFS(0.15)LS(0.849)NY(0.001)NLDLIK	5	QLNDDNYNASKNFSLSNYNLDLIKCLQDDSG	PF14_0649
PF3D7_1350900	ApiAP2	AP2 domain transcription factor AP2-O4, putative	No	0.730786	0.334108	0.41581	0.615587	0.284837	0.29175	-0.022558	-0.681206	0.0495796	-0.46377	-0.129662	-0.46542	-0.0496101	-0.598656	0.0169315	-0.713659	-0.428822	-0.46036	-0.16861	-0.644211	-0.666769	PF3D7_1350900	244	S	___1	NKYNEENS(1)DEGNVIK	8	TNELSNEKNKYNEENSDEGNVIKYKYLPTGV	PF13_0267
PF3D7_0826900		conserved Plasmodium protein, unknown function	No	0.730421	-0.2117	-0.11437	-0.36929	-0.19852	-0.21898	-0.22616	-1.39032	-0.659899	-1.43291	-1.64461	-1.45006	-1.56443	-1.40368	-1.77297	-1.57284	-1.77136	-1.26214	-1.48112	-1.34542	-1.57158	PF3D7_0826900	529	S	___1	IQNNNNMS(0.5)DENNS(0.5)FVLDPLVSDENK	13	DSKIQNNNNMSDENNSFVLDPLVSDENKHQK	MAL8P1.20
PF3D7_0914900		BSD-domain protein, putative	No	0.729586	0.080139	0.373239	0.947744	0.530738	0.41148	0.351021	-0.0181847	0.711401	0.606131	0.68627	0.00184059	0.37508	-0.196964	0.75078	-0.42621	0.104528	-0.33967	0.0718098	-0.420591	-0.0695705	PF3D7_0914900	556	S	___2	FLDEIS(1)EANRS(1)ACDLEEPK	6	FQKISEYNTKFLDEISEANRSACDLEEPKSD	PFI0730w
PF3D7_0914900		BSD-domain protein, putative	No	0.729586	0.080139	0.373239	0.947744	0.530738	0.41148	0.351021	-0.0181847	0.711401	0.606131	0.68627	0.00184059	0.37508	-0.196964	0.75078	-0.42621	0.104528	-0.33967	0.0718098	-0.420591	-0.0695705	PF3D7_0914900	561	S	___2	FLDEIS(1)EANRS(1)ACDLEEPK	11	EYNTKFLDEISEANRSACDLEEPKSDFFDSS	PFI0730w
PF3D7_0500800	MESA	mature parasite-infected erythrocyte surface antigen	Yes	0.727517	0.466829	0.446291	0.581396	0.593239	0.388211	0.345522	-0.423306	0.304211	-0.23345	0.233379	-0.45837	-0.0120792	-0.106846	0.47455	-0.38813	0.205109	-0.0801697	0.308041	-0.421181	-0.0756588	PF3D7_0500800	547	S	___1	VIGS(1)EKT(1)QK	4	DVKEKNDGKKDKVIGSEKTQKEIKEKVEKRV	MAL5P1.9;PFE0040c
PF3D7_1435600		conserved Plasmodium protein, unknown function	No	0.725557	0.759378	0.686159	0.488736	0.308409	0.430439	0.44722	-0.603426	0.122131	-0.67704	0.0823383	-0.669779	0.0163803	-0.750525	-0.261789	-0.581249	-0.27284	-0.386049	0.0443897	-0.54895	-0.10173	PF3D7_1435600	482	S	___1	S(1)QVHYFK	1	CSSTIGKRHILNSSKSQVHYFKTNNSGDQNE	PF14_0337
PF3D7_0911900	ICP	falstatin	Yes	0.72541	-0.19747	-0.45032	-0.08872	-0.10363	0.68074	-0.94903	-4.30943	-3.58402	-3.68927	-3.88674	-4.11014	-4.56046	-4.44248	-4.5312	-4.2658	-4.36943	-4.94587	-4.26513	-3.57598	-4.52501	PF3D7_0911900	233	T	___2	IFS(0.111)EEENT(0.844)EVES(0.395)AENNHT(0.336)NS(0.309)LNPNES(0.004)CDQIIK	8	NVPELKARIFSEEENTEVESAENNHTNSLNP	PFI0580c
PF3D7_0615600		conserved Plasmodium protein, unknown function	No	0.724516	0.227149	-0.102091	0.109385	0.002339	-0.143771	-0.003378	0.759834	1.48435	0.850931	1.07808	0.949511	0.84742	0.936295	1.04568	0.88866	0.890999	1.08927	0.945499	0.898119	0.894741	PF3D7_0615600	2188	S	___1	HENNS(1)NNIYNIDNDNIK	5	VNNTCLDKNIKHENNSNNIYNIDNDNIKNRY	2270.t00046;MAL6P1.270;PFF0755c
PF3D7_0523400		DnaJ protein, putative	Yes	0.723964	0.046358	-0.05043	0.015137	-0.03768	-0.30238	0.15837	0.249926	0.97389	0.46763	0.513988	0.879461	0.829031	0.817795	0.832932	0.87612	0.83844	1.27956	0.97718	0.86668	1.02505	PF3D7_0523400	416	S	___1	TS(0.042)S(0.957)LANQIR	3	IGTGFKFVKTLIKTSSLANQIRKKEDDDDIS	MAL5P1.234;PFE1170w
PF3D7_0214300		conserved Plasmodium protein, unknown function	No	0.719504	0.216608	0.067311	1.46042	-0.090221	0.09038	0.132201	0.410376	1.12988	0.37578	0.592388	0.525909	0.59322	0.322016	1.78244	0.36264	0.272419	0.424261	0.514641	0.253059	0.38526	PF3D7_0214300	1983	S	___1	S(1)KEVDTLK	1	KESDSFRGRERGSRRSKEVDTLKGRERDSLK	PF02_0134;PFB0650w
PF3D7_1149000	Pf332	antigen 332, DBL-like protein	Yes	0.718631	0.49922	0.686551	0.72112	0.31053	0.39353	0.30405	-1.70646	-0.987829	-1.61883	-1.11961	-1.6643	-0.977749	-1.65837	-0.93725	-2.34159	-2.03106	-1.95616	-1.56263	-1.71087	-1.40682	PF3D7_1149000	1054	S	___1	ELPVKEES(1)VFEELTEEDQSVTK	8	VEEEFVTKELPVKEESVFEELTEEDQSVTKE	PF11_0506;PF11_0507
PF3D7_1241500		conserved Plasmodium protein, unknown function	No	0.7137	0.0776	-0.04273	-0.01654	0.223	0.11871	-0.03311	3.00568	3.71938	2.7648	2.8424	2.73509	2.69236	2.78032	2.76378	2.74482	2.96782	2.52543	2.64414	2.81794	2.78483	PF3D7_1241500	218	S	___1	NNES(1)QLDNVS(1)IK	10	IYKRRKNNESQLDNVSIKSKNKKKKKGYPNK	2277.t00399;MAL12P1.397;PFL1995c
PF3D7_1039000	FIKK10.2	serine/threonine protein kinase, FIKK family	Yes	0.71145	0.28905	0.420239	0.59814	0.33455	0.446379	0.404412	1.43783	2.14928	1.09833	1.38738	0.964941	1.38518	1.11946	1.7176	1.38891	1.72346	0.717251	1.16363	-0.278681	0.125731	PF3D7_1039000	355	S	___1	RFDGDQENITS(0.024)S(0.976)FER	12	IKKRRFDGDQENITSSFERTQKSVKYDSDES	PF10_0380
PF3D7_1306800		RED-like protein, putative	No	0.70959	0.13726	0.09461	-0.01789	-0.09973	-0.44378	-0.01593	-1.49109	-0.7815	-1.84482	-1.70756	-1.43629	-1.34168	-1.54129	-1.55918	-1.46131	-1.56104	-1.24104	-1.68482	-1.53131	-1.54724	PF3D7_1306800	2	S	___1	S(0.793)T(0.207)ELTNNDFRR	1	______________MSTELTNNDFRRIFDNF	MAL13P1.34
PF3D7_1306800		RED-like protein, putative	No	0.70959	0.13726	0.09461	-0.01789	-0.09973	-0.44378	-0.01593	-1.49109	-0.7815	-1.84482	-1.70756	-1.43629	-1.34168	-1.54129	-1.55918	-1.46131	-1.56104	-1.24104	-1.68482	-1.53131	-1.54724	PF3D7_1306800	3	T	___1	S(0.5)T(0.5)ELTNNDFRR	2	_____________MSTELTNNDFRRIFDNFE	MAL13P1.34
PF3D7_1362700		conserved Plasmodium protein, unknown function	No	0.70421	0.11312	0.52684	1.29512	0.16842	0.73771	0.37722	-1.88522	-1.18101	-1.71098	-1.59786	-1.86151	-1.33467	-1.8379	-0.54278	-1.76335	-1.59493	-2.01501	-1.2773	-2.14361	-1.76639	PF3D7_1362700	677	S	___1	HNNES(1)EHAYIDNKK	5	KSIILENQVYKHNNESEHAYIDNKKNSLINS	MAL13P1.313;PF13_0332
PF3D7_1149000	Pf332	antigen 332, DBL-like protein	Yes	0.70102	0.58952	0.45092	0.95902	0.52796	0.27319	0.49351	-1.78998	-1.08896	-2.10752	-1.518	-1.98046	-1.52954	-2.22023	-1.26121	-2.43937	-1.91141	-2.46036	-2.18717	-2.34432	-1.85081	PF3D7_1149000	1878	S	___1	IT(0.034)ENIPVERES(0.81)VT(0.156)EDIVQEPS(0.001)LAQEVEQK	11	FQEEKITENIPVERESVTEDIVQEPSLAQEV	PF11_0506;PF11_0507
PF3D7_0603600		conserved Plasmodium protein, unknown function	No	0.700386	0.221188	0.508249	0.573216	0.552469	0.371858	0.155821	-0.565645	0.134741	-0.392149	-0.170961	-0.490059	0.0181904	-0.358515	0.214701	-0.66963	-0.117161	-0.460449	-0.0885906	-0.49514	-0.339319	PF3D7_0603600	1227	T	___1	NYT(0.999)FS(0.001)LLEYEK	3	KLYGKYWKKGGKKNYTFSLLEYEKISNDPRG	2270.t00333;MAL6P1.39;PFF0175c
PF3D7_0113200		Plasmodium exported protein, unknown function	Yes	0.699505	0.461058	0.609801	0.309416	0.397558	0.771939	0.372532	0.719355	1.41886	-0.151949	0.309109	-0.54818	0.0616207	0.190845	0.500261	0.00978088	0.407339	-0.701979	0.0699596	-0.425421	-0.0528889	PF3D7_0113200	396	S	___1	HES(1)LHS(0.983)Y(0.017)NIK	6	NDKIRKSNNRHESLHSYNIKETPKKNKKKSQ	MAL1P3.08;PFA0630c
PF3D7_0730900	PTP4	EMP1-trafficking protein	Yes	0.69939	0.55857	-0.11894	0.642861	0.23163	0.45263	-0.10794	-1.8154	-1.11601	-2.03081	-1.47224	-3.21271	-3.33165	-1.50949	-0.866629	-1.78346	-1.55183	-2.08642	-1.63379	-1.60629	-1.71423	PF3D7_0730900	336	T	___1	VNTTNNAPNVIKS(0.5)NT(0.5)HGGMNNK	15	KVNTTNNAPNVIKSNTHGGMNNKVNTTNNAP	MAL7P1.171
PF3D7_0500800	MESA	mature parasite-infected erythrocyte surface antigen	Yes	0.69584	0.56445	0.64517	0.652	0.53292	0.45893	0.29031	2.12873	2.82457	2.10491	2.66936	2.19213	2.8373	2.293	2.945	2.08695	2.61987	2.21581	2.67474	2.01818	2.30849	PF3D7_0500800	386	S	___1	LGENVNDGAS(1)ENS(1)EDPKK	13	GEKLGENVNDGASENSEDPKKLTEQEENGTK	MAL5P1.9;PFE0040c
PF3D7_0424700	FIKK4.2	serine/threonine protein kinase, FIKK family	Yes	0.695365	-0.10076	-0.50772	0.24184	0.0487	0.17626	-0.17197	-0.953485	-0.25812	-1.27483	-1.37559	-1.33098	-1.8387	3.59925	3.84109	-2.81095	-2.76225	-1.22695	-1.05069	-1.06906	-1.24103	PF3D7_0424700	250	S	___1	VYS(1)WELGK	3	CKVENVENINYERVYSWELGKEALTKLLGCS	MAL4P1.230;PFD1175w
PF3D7_1149000	Pf332	antigen 332, DBL-like protein	Yes	0.694536	0.617117	0.63584	0.664655	0.49131	0.45862	0.341551	0.181185	0.875721	0.110811	0.727928	0.41387	1.04971	0.467855	1.13251	0.32555	0.81686	0.157431	0.616051	0.249449	0.591	PF3D7_1149000	148	S	___1	S(1)RDDTEDQFLR	1	RENGLDVCKSQCEERSRDDTEDQFLRFFAEW	PF11_0506;PF11_0507
PF3D7_1425800		conserved Plasmodium protein, unknown function	No	0.69378	0.0986	-0.18343	-0.08203	-0.01431	0.38616	0.39354	-3.09422	-2.40044	-2.61023	-2.51163	-2.56724	-2.75067	-2.77787	-2.8599	-2.82909	-2.8434	-2.67538	-2.28922	-3.04923	-2.65569	PF3D7_1425800	216	S	___1	YSSSLNDFNDIS(0.418)DS(0.582)LNLK	14	TKYSSSLNDFNDISDSLNLKNDIINNEEEYN	PF14_0238
PF3D7_1140700		conserved Plasmodium protein, unknown function	No	0.69344	0.20678	0.44252	0.17968	0.29972	0.43929	0.18012	-1.25833	-0.56489	-1.32792	-1.12114	-1.45435	-1.01183	-1.21736	-1.03768	-1.32961	-1.02989	-1.58292	-1.14363	-1.29296	-1.11284	PF3D7_1140700	1212	T	___1	YDAHVDDDIDDDEEEENT(1)DKNNNTIR	18	AHVDDDIDDDEEEENTDKNNNTIRSSIQSDI	PF11_0418
PF3D7_1002100	PTP5	EMP1-trafficking protein	Yes	0.693235	0.317038	0.445179	0.486647	0.571029	0.0982588	0.546332	-0.417564	0.275671	0.0342312	0.351269	-0.167629	0.27755	0.0461941	0.532841	-0.30352	0.267509	0.0739212	0.17218	-0.414431	0.131901	PF3D7_1002100	256	S	___1	GS(0.046)S(0.946)EGET(0.006)S(0.002)S(0.001)K	3	SKYTMNLDSPLLKGSSEGETSSKKAQEKSVE	PF10_0025
PF3D7_0409100	PRPF31	U4/U6 small nuclear ribonucleoprotein PRP31, putative	No	0.69193	-0.52049	0.06877	0.45839	0.40146	0.36389	-0.01477	-4.20199	-3.51006	-4.09336	-4.61385	-4.21287	-4.1441	-4.56215	-4.10376	-4.13195	-3.73049	-4.53925	-4.17536	-4.00559	-4.02036	PF3D7_0409100	7	S	___1	AT(0.004)LADS(0.996)FLK	6	_________MATLADSFLKDLEDLEFEDEEE	MAL4P2.27;PFD0450c
PF3D7_1140700		conserved Plasmodium protein, unknown function	No	0.68941	0.52669	0.03554	0.2933	0.58794	0.79845	-0.14258	-2.38049	-1.69108	-2.56542	-2.03873	-2.73697	-2.70143	-2.38745	-2.09415	-2.65166	-2.06372	-3.12159	-2.32314	-2.39337	-2.53595	PF3D7_1140700	96	S	___2	NY(0.431)DS(0.49)DENT(0.079)WEPFENLS(1)PNLK	16	NYDSDENTWEPFENLSPNLKGQARKVALQLT	PF11_0418
PF3D7_1009400	ZNF2	zinc finger protein, putative	No	0.689007	0.30633	0.581191	0.794775	0.361399	0.52281	0.42015	0.178394	0.867401	0.30933	0.61566	0.0512505	0.632441	0.272945	1.06772	0.19096	0.552359	0.07201	0.59482	0.10191	0.52206	PF3D7_1009400	313	S	___1	WDVPEPS(1)EGDPSILK	7	IQQKRPSTKWDVPEPSEGDPSILKHNKEDST	PF10_0091
PF3D7_1349500		conserved Plasmodium protein, unknown function	No	0.68824	0.10387	0.04094	0.28585	0.0481	-0.13339	0.0226	-3.1932	-2.50496	-2.44494	-2.34107	-1.95033	-1.90939	-2.11269	-1.82684	-1.98036	-1.93226	-1.34825	-1.48164	-1.95946	-1.93686	PF3D7_1349500	2767	S	___1	LS(0.5)S(0.5)LDDNQNNSICNIK	2	KEIDNEKNKLNKVKLSSLDDNQNNSICNIKN	MAL13P1.249
PF3D7_0418600		regulator of chromosome condensation, putative	No	0.68483	0.23296	0.18107	0.15997	0.1707	-0.23199	0.36646	-2.72366	-2.03883	-2.41077	-2.17781	-1.97518	-1.79411	-1.67439	-1.51442	-1.94971	-1.77901	-1.72329	-1.95528	-1.96069	-1.59423	PF3D7_0418600	1961	S	___1	RNS(1)CLWNYFTYHK	3	SNEVKMRFKVFKKRNSCLWNYFTYHKHRNQY	MAL4P1.175;PFD0900w
PF3D7_0817300		conserved Plasmodium protein, unknown function	No	0.684311	0.29342	0.42889	0.804751	0.23827	0.28557	0.47703	-1.48457	-0.800259	-1.57317	-1.27975	-1.5979	-1.16901	-1.77678	-0.972029	-1.6432	-1.40493	-1.87481	-1.58924	-1.88272	-1.40569	PF3D7_0817300	29	S	___2	NNS(0.001)S(0.004)NS(0.361)S(0.634)NENNNNDENVS(1)LHAER	18	SSNSSNENNNNDENVSLHAERNNETNCTKGN	PF08_0060
PF3D7_0730800		Plasmodium exported protein, unknown function, unspecified product	Yes	0.68309	0.55471	1.25576	0.71934	0.86977	0.31816	0.80961	-3.79679	-3.1137	-3.07472	-2.52001	-4.21221	-2.95645	-3.4283	-2.70896	-3.65809	-2.78832	-5.21024	-4.89208	-4.04688	-3.23727	PF3D7_0730800;PF3D7_0730800	126;126	T	___1	YVNEDGTTKPNAPT(0.012)AQS(0.359)LT(0.526)S(0.103)IVK	19	EDGTTKPNAPTAQSLTSIVKGVMHDIKPQME	MAL7P1.170;PF3D7_0730800.1;PF3D7_0730800.2
PF3D7_0113200		Plasmodium exported protein, unknown function	Yes	0.682865	0.485618	0.79172	0.705335	0.269138	0.720249	0.46385	-0.103065	0.5798	-0.14768	0.337938	-2.36955	-1.57783	-0.0944042	0.610931	-0.44689	-0.177752	-0.342129	0.37812	-0.50345	-0.0396004	PF3D7_0113200	191	S	___1	NQS(0.187)IS(0.909)S(0.904)NNNNNNNKEEEEECTK	6	KRNISISNKRNQSISSNNNNNNNKEEEEECT	MAL1P3.08;PFA0630c
PF3D7_1453800	GluPho	glucose-6-phosphate dehydrogenase-6-phosphogluconolactonase	No	0.68093	-0.20239	-0.13605	0.10259	0.33249	0.09437	-0.4981	2.5344	3.21533	3.78322	3.58083	3.00508	2.86903	3.33071	3.4333	3.14576	3.47825	2.61052	2.70489	3.68766	3.18956	PF3D7_1453800	900	S	___1	KS(0.068)S(0.932)FYEDDLLDIN	3	YGKNYTHRPEFVRKSSFYEDDLLDIN_____	PF14_0511
PF3D7_0801000		Plasmodium exported protein (PHISTc), unknown function	Yes	0.68012	0.476167	0.732559	0.825546	0.288709	0.50836	-0.15525	1.05133	1.73145	0.116301	0.592468	0.510191	1.24275	0.552244	1.37779	0.61772	0.906429	0.61128	1.11964	-1.43977	-1.59502	PF3D7_0801000	163	S	___1	GS(0.08)LGFDS(0.92)FK	7	RNNTPNLRKGSLGFDSFKKLELGTLNQFDKD	PF08_0137
PF3D7_0621200	PDX1	pyridoxine biosynthesis protein PDX1	No	0.679426	0.28563	-0.05141	0.45806	0.24551	0.22845	-0.07887	0.730034	1.40946	1.82735	2.11298	1.72795	1.67654	1.54157	1.99963	1.50665	1.75216	1.63763	1.86608	1.68536	1.60649	PF3D7_0621200	299	T	___1	NEEHTKFLT(1)PQ	9	SDKWKNKNEEHTKFLTPQ_____________	2270.t00102;MAL6P1.215;PFF1025c
PF3D7_1149100		Plasmodium exported protein, unknown function	Yes	0.678797	0.608458	0.469719	0.765745	0.51649	0.603031	0.301561	-0.350626	0.328171	-0.207289	0.401169	-0.0704288	0.39929	0.149876	0.915621	-0.356421	0.160069	-0.40764	0.195391	-0.60111	-0.299549	PF3D7_1149100;PF3D7_1149100	186;187	T	___1	TETQEESLNKEVVEGCS(0.492)T(0.508)GMCPLK	18	TQEESLNKEVVEGCSTGMCPLKNNDTKKENC	PF11_0508;PF3D7_1149100.1;PF3D7_1149100.2
PF3D7_1464200		zinc finger protein, putative	No	0.678266	0.0239982	-0.11632	0.145056	-0.1021	-0.23142	-0.144138	-0.524925	0.153341	-0.0919189	-0.0679207	0.24222	0.1259	-0.111614	0.0334415	0.00774956	-0.0943508	0.4708	0.23938	0.188419	0.044281	PF3D7_1464200	235	S	___1	ADS(1)FFK	3	IIDIIKLDFKYNKADSFFKLINIAKNNQNNN	PF14_0610
PF3D7_0401800	PfD80	Plasmodium exported protein (PHISTb), unknown function	Yes	0.67586	0.33533	0.47498	1.12644	0.64635	0.4429	0.39576	4.42097	5.09683	4.36654	4.70187	5.61388	6.08886	3.67471	4.80115	3.83083	4.47718	4.24553	4.68843	2.68481	3.08057	PF3D7_0401800	138	S	___1	SASAAS(0.999)T(0.998)T(0.003)R	6	STASAASTTRSASAASTTRSASAASTTRSAS	MAL4P1.16;PFD0080c
PF3D7_1039000	FIKK10.2	serine/threonine protein kinase, FIKK family	Yes	0.67581	-0.04825	0.21565	0.48082	0.30829	0.2851	0.03436	2.1349	2.81071	1.77441	1.72616	2.28769	2.50334	1.47318	1.954	1.25387	1.56216	1.03117	1.31627	-0.84411	-0.80975	PF3D7_1039000	353	T	___1	FDGDQENIT(0.997)S(0.003)SFER	9	NDIKKRRFDGDQENITSSFERTQKSVKYDSD	PF10_0380
PF3D7_1203000	ORC1	origin recognition complex subunit 1	No	0.67214	-1.17973	0.37516	-0.18086	0.16433	-0.10388	0.57692	-3.94606	-3.27392	-2.94318	-4.12291	-4.02691	-3.65175	-3.28603	-3.46689	-3.64237	-3.47804	-3.61112	-3.715	-3.72436	-3.14744	PF3D7_1203000	283	S	___2	RT(0.746)S(0.746)HQS(0.508)QDQNNHFER	3	NIKKDRDKDIQTKRTSHQSQDQNNHFERRIL	2277.t00030;MAL12P1.30;PFL0150w
PF3D7_1358600		zinc finger protein, putative	No	0.671981	-0.129711	-0.112761	-0.051134	0.00145	-0.34464	0.20851	-1.50781	-0.835829	-0.82922	-0.958931	-0.303329	-0.41609	-0.691496	-0.74263	-1.30024	-1.29879	-0.72526	-1.0699	-1.49109	-1.28258	PF3D7_1358600	520	S	___1	NNIMAS(1)QTK	6	MNNIKDKKKKNNIMASQTKEGENKINCTEYE	PF13_0314
PF3D7_1149000	Pf332	antigen 332, DBL-like protein	Yes	0.670371	0.736098	0.593941	0.684376	-0.17223	0.623889	0.413252	-1.18472	-0.514349	-0.677319	0.0587788	-0.96633	-0.372389	-0.486746	0.19763	-2.03133	-2.20356	-0.855989	-0.2321	-0.982731	-0.569479	PF3D7_1149000	2346	S	___2	SATEDLVEEEAS(1)VTEK	12	EVERSATEDLVEEEASVTEKVSVHEGSTTEQ	PF11_0506;PF11_0507
PF3D7_1149000	Pf332	antigen 332, DBL-like protein	Yes	0.670371	0.736098	0.593941	0.684376	-0.17223	0.623889	0.413252	-1.18472	-0.514349	-0.677319	0.0587788	-0.96633	-0.372389	-0.486746	0.19763	-2.03133	-2.20356	-0.855989	-0.2321	-0.982731	-0.569479	PF3D7_1149000	2337	T	___2	S(0.075)AT(0.925)EDLVEEEAS(0.908)VT(0.092)EK	3	ERSVTEKPVEVERSATEDLVEEEASVTEKVS	PF11_0506;PF11_0507
PF3D7_0501300	SBP1	skeleton-binding protein 1	Yes	0.668726	0.535558	0.67381	0.526454	0.59516	0.52653	-0.31652	0.100874	0.7696	0.41449	0.950048	0.38912	1.06293	0.721186	1.24764	0.37183	0.96699	0.63567	1.1622	-1.5817	-1.89822	PF3D7_0501300	324	S	___2	TQQNPQQNAQQNTQQNT(0.001)QQQS(0.894)T(0.049)T(0.071)KS(0.498)T(0.419)T(0.068)K	21	QQNAQQNTQQNTQQQSTTKSTTKTVARET__	MAL5P1.14;PFE0065w
PF3D7_1228300	NEK1	NIMA related kinase 1	No	0.668295	0.103499	0.04344	0.14887	0.02172	-0.19185	0.04277	-0.846325	-0.17803	-1.05559	-0.952091	-0.9879	-0.94446	-1.19861	-1.04974	-1.19896	-1.17724	-1.09292	-1.28477	-1.48365	-1.44088	PF3D7_1228300	1002	S	___1	S(0.5)MS(0.5)ACINDEENK	3	AMDKSSEYNRRNRSMSACINDEENKNSYNVK	2277.t00274;MAL12P1.274;PFL1370w
PF3D7_1149000	Pf332	antigen 332, DBL-like protein	Yes	0.66702	0.54251	0.54011	0.6015	0.38612	0.52625	0.33154	5.74993	6.41695	5.32538	5.86789	5.56402	6.10413	5.75398	6.35548	5.7333	6.11942	5.45592	5.98217	3.79016	4.1217	PF3D7_1149000	4691	S	___1	SVIEEAVEKQGS(1)VTEEK	12	EVDKSVIEEAVEKQGSVTEEKVQEGVSAIEE	PF11_0506;PF11_0507
PF3D7_1122800	CDPK6	calcium-dependent protein kinase 6	No	0.666996	0.24662	0.443159	0.802915	0.582998	0.44598	0.34848	-0.302555	0.364441	1.14517	1.39179	0.440411	0.88357	0.102715	0.90563	-0.758869	-0.175871	0.0151196	0.4611	-0.0111008	0.337379	PF3D7_1122800	1130	T	___1	MNY(0.032)T(0.943)DFRQMY(0.026)WDLLK	4	VYKDYDSSKNNRMNYTDFRQMYWDLLKQIKK	PF11_0239
PF3D7_1149100		Plasmodium exported protein, unknown function	Yes	0.66603	0.45553	0.50397	0.844491	0.36923	0.61249	0.37695	-2.35132	-1.68529	-2.71102	-2.25549	-1.93481	-1.43084	-1.77715	-0.932659	-2.08755	-1.71832	-1.91479	-1.3023	-2.05158	-1.67463	PF3D7_1149100;PF3D7_1149100	416;417	S	___2	NST(0.002)NDS(0.997)IKTPK	6	EESLNKLSTKNSTNDSIKTPKKKSNNKNTKE	PF11_0508;PF3D7_1149100.1;PF3D7_1149100.2
PF3D7_1149100		Plasmodium exported protein, unknown function	Yes	0.66603	0.45553	0.50397	0.844491	0.36923	0.61249	0.37695	-2.35132	-1.68529	-2.71102	-2.25549	-1.93481	-1.43084	-1.77715	-0.932659	-2.08755	-1.71832	-1.91479	-1.3023	-2.05158	-1.67463	PF3D7_1149100;PF3D7_1149100	413;414	T	___2	NS(0.022)T(0.978)NDSIKTPK	3	ETQEESLNKLSTKNSTNDSIKTPKKKSNNKN	PF11_0508;PF3D7_1149100.1;PF3D7_1149100.2
PF3D7_1476300		Plasmodium exported protein (PHISTb), unknown function	Yes	0.66223	0.38293	0.10725	0.46726	-0.08536	0.24066	0.35463	-2.7809	-2.11867	-2.28012	-1.89719	-0.875999	-0.768749	-2.1656	-1.69834	-2.08431	-2.16967	-2.06444	-1.82378	-2.16154	-1.80691	PF3D7_1476300	73	S	___1	HLNFS(0.156)VS(0.844)LENVNDLANSTK	7	LYENNNVDKHLNFSVSLENVNDLANSTKKEI	PF14_0732
PF3D7_0918900	gammaGCS	gamma-glutamylcysteine synthetase	No	0.66181	0.20564	-0.01553	-0.06317	0.196	0.23987	0.16066	-2.18233	-1.52052	-1.62037	-1.41473	-1.56569	-1.58122	-1.71183	-1.775	-1.63729	-1.44129	-1.65378	-1.41391	-1.54064	-1.37998	PF3D7_0918900	322	S	___1	SCNDYNNVNDS(0.822)S(0.156)NT(0.022)QDIFISSLKK	11	DNTPRSCNDYNNVNDSSNTQDIFISSLKKTD	PFI0925w
PF3D7_1149000	Pf332	antigen 332, DBL-like protein	Yes	0.66138	0.51964	0.62108	0.61184	0.40576	0.63896	0.40094	5.25747	5.91885	4.72765	5.24729	4.94884	5.56992	5.21633	5.82817	5.22266	5.62842	4.78696	5.42592	3.15595	3.55689	PF3D7_1149000	4693	T	___1	QGS(0.279)VT(0.721)EEK	5	DKSVIEEAVEKQGSVTEEKVQEGVSAIEEIE	PF11_0506;PF11_0507
PF3D7_1149000	Pf332	antigen 332, DBL-like protein	Yes	0.660425	0.628769	0.525631	0.839026	0.56635	0.708341	0.49532	-0.569485	0.0909405	-0.80578	-0.177011	-0.76931	-0.243679	-0.676825	0.162201	-1.67145	-1.1051	-1.16718	-0.458839	-0.89679	-0.40147	PF3D7_1149000	1391	T	___1	EAS(0.401)IT(0.599)EEVEQIEPVTGK	5	REGSINEDIVKEASITEEVEQIEPVTGKVEK	PF11_0506;PF11_0507
PF3D7_1303800		conserved Plasmodium protein, unknown function	No	0.65775	0.54486	-0.36427	-0.1861	0.22185	0.512	-0.24454	-2.96307	-2.30532	-3.00004	-2.45518	-2.7349	-3.09917	-2.98215	-3.16825	-3.27814	-3.05629	-3.70576	-3.19376	-2.85575	-3.10029	PF3D7_1303800	1047	S	___1	NNS(1)EIDEVINLQLK	3	CANSYRQNNQTQKNNSEIDEVINLQLKKCGK	MAL13P1.19
PF3D7_0107500	NCR1	lipid/sterol:H+ symporter	No	0.65682	0.00122	0.2351	0.36194	0.06048	0.0416	0.42628	-2.1949	-1.53808	-1.62731	-1.62609	-1.87578	-1.64068	-1.85573	-1.49379	-1.96897	-1.90849	-1.88464	-1.84304	-2.27007	-1.84379	PF3D7_0107500	925	S	___2	S(0.034)S(0.034)GY(0.001)DS(0.148)S(0.744)Y(0.01)NDLQS(0.01)S(0.01)S(0.01)LPNPS(0.001)SNEVLNK	7	LLDRGDVIKSSGYDSSYNDLQSSSLPNPSSN	MAL1P2.03;PFA0375c
PF3D7_0404600		conserved Plasmodium membrane protein, unknown function	No	0.65467	0.44776	0.49686	0.65889	0.36897	0.773621	0.67495	-1.36596	-0.71129	-1.59185	-1.14409	-1.57253	-1.07567	-1.67424	-1.01535	-1.38818	-1.01921	-1.71834	-0.944719	-1.70059	-1.02564	PF3D7_0404600	1373	S	___1	NIAFLYEENKYS(0.992)DS(0.008)HNIGNIK	12	DKDKNIAFLYEENKYSDSHNIGNIKYINNNI	MAL4P1.44;PFD0220c;PFD0220w;PFD0225w
PF3D7_1221400	IMC1h	inner membrane complex protein 1h, putative	No	0.654611	0.665219	0.66422	1.12451	0.27671	0.54517	0.07538	-1.21737	-0.562759	-1.18299	-0.517771	-1.353	-0.68878	-1.17283	-0.0483189	-1.1529	-0.87619	-1.57283	-1.02766	-1.30082	-1.22544	PF3D7_1221400	514	T	___1	VPFLPAPAAPGT(1)PDIENIEK	12	HHNRVPFLPAPAAPGTPDIENIEKNM_____	2277.t00206;MAL12P1.206;PFL1030w
PF3D7_0202000	KAHRP	knob-associated histidine-rich protein	Yes	0.654576	0.454788	0.72068	0.492836	0.467989	0.80448	0.23258	-0.537636	0.11694	-1.14213	-0.687342	-1.02306	-0.30238	-0.694895	-0.202059	-0.96262	-0.494631	-1.11167	-0.30719	-1.95047	-1.71789	PF3D7_0202000	580	S	___2	EAS(0.881)T(0.121)S(0.999)KGATK	5	KEASTSKEATKEASTSKGATKEASTTEGATK	PF02_0020;PFB0100c
PF3D7_1223400		phospholipid-transporting ATPase, putative	No	0.65411	-0.15013	-0.24034	-0.01796	0.10045	-0.26525	-0.19876	-3.45306	-2.79895	-2.89528	-3.04541	-2.87011	-3.11045	-3.08397	-3.10193	-3.27846	-3.17801	-2.95114	-3.21639	-3.04119	-3.23995	PF3D7_1223400	245	S	___3	Y(0.003)NES(0.015)NNNCS(0.655)ET(0.655)S(0.655)NNLLFS(0.016)ENEK	9	NELIDDRYNESNNNCSETSNNLLFSENEKSQ	2277.t00225;MAL12P1.225;PFL1125w
PF3D7_1223400		phospholipid-transporting ATPase, putative	No	0.65411	-0.15013	-0.24034	-0.01796	0.10045	-0.26525	-0.19876	-3.45306	-2.79895	-2.89528	-3.04541	-2.87011	-3.11045	-3.08397	-3.10193	-3.27846	-3.17801	-2.95114	-3.21639	-3.04119	-3.23995	PF3D7_1223400	248	S	___3	Y(0.001)NES(0.005)NNNCS(0.643)ET(0.693)S(0.693)NNLLFS(0.966)ENEK	12	IDDRYNESNNNCSETSNNLLFSENEKSQKKG	2277.t00225;MAL12P1.225;PFL1125w
PF3D7_1223400		phospholipid-transporting ATPase, putative	No	0.65411	-0.15013	-0.24034	-0.01796	0.10045	-0.26525	-0.19876	-3.45306	-2.79895	-2.89528	-3.04541	-2.87011	-3.11045	-3.08397	-3.10193	-3.27846	-3.17801	-2.95114	-3.21639	-3.04119	-3.23995	PF3D7_1223400	254	S	___3	NIDNELIDDRYNES(0.001)NNNCS(0.003)ET(0.003)S(0.003)NNLLFS(0.99)ENEK	28	ESNNNCSETSNNLLFSENEKSQKKGKKKQKK	2277.t00225;MAL12P1.225;PFL1125w
PF3D7_1223400		phospholipid-transporting ATPase, putative	No	0.65411	-0.15013	-0.24034	-0.01796	0.10045	-0.26525	-0.19876	-3.45306	-2.79895	-2.89528	-3.04541	-2.87011	-3.11045	-3.08397	-3.10193	-3.27846	-3.17801	-2.95114	-3.21639	-3.04119	-3.23995	PF3D7_1223400	247	T	___3	Y(0.001)NES(0.005)NNNCS(0.643)ET(0.693)S(0.693)NNLLFS(0.966)ENEK	11	LIDDRYNESNNNCSETSNNLLFSENEKSQKK	2277.t00225;MAL12P1.225;PFL1125w
PF3D7_0606100		RNA-binding protein, putative	No	0.65344	-0.05101	-0.20601	0.31192	-0.69885	0.66486	-0.53952	-3.98884	-3.3354	-3.43444	-3.48545	-3.63027	-3.83628	-3.93416	-3.62224	-3.403	-4.10185	-4.09021	-3.42535	-3.53886	-4.07838	PF3D7_0606100	2	S	___1	S(0.5)LNFS(0.5)IANVVYVK	1	______________MSLNFSIANVVYVKNLS	2270.t00254;MAL6P1.64;PFF0300w
PF3D7_0606100		RNA-binding protein, putative	No	0.65344	-0.05101	-0.20601	0.31192	-0.69885	0.66486	-0.53952	-3.98884	-3.3354	-3.43444	-3.48545	-3.63027	-3.83628	-3.93416	-3.62224	-3.403	-4.10185	-4.09021	-3.42535	-3.53886	-4.07838	PF3D7_0606100	6	S	___1	S(0.5)LNFS(0.5)IANVVYVK	5	__________MSLNFSIANVVYVKNLSSDIT	2270.t00254;MAL6P1.64;PFF0300w
PF3D7_0501400	FIRA	interspersed repeat antigen	Yes	0.651085	0.12773	0.447361	0.758726	0.4991	0.421509	0.355411	0.434315	1.0854	3.0447	3.17243	0.32955	0.776911	0.872074	1.6308	0.56953	1.06863	0.471481	0.89299	0.701019	1.05643	PF3D7_0501400	1297	S	___1	KGS(0.092)ES(0.908)DNNALNK	5	SITTQEHIDKKKGSESDNNALNKLSENKTST	MAL5P1.15;PFE0070w
PF3D7_0702500		Plasmodium exported protein, unknown function	Yes	0.6501	0.91047	0.54646	0.97855	0.0908	1.06705	0.6376	-2.4979	-1.8478	-2.92331	-2.01284	-2.52556	-1.9791	-2.34949	-1.37094	-2.71715	-2.62635	-3.33297	-2.26592	-4.74767	-4.11007	PF3D7_0702500	171	S	___2	NS(0.023)S(0.109)QHS(0.867)VGS(0.008)HS(0.451)VS(0.65)S(0.891)QEHK	13	DGRNSSQHSVGSHSVSSQEHKKEHSTHDLPA	PF07_0008
PF3D7_1140700		conserved Plasmodium protein, unknown function	No	0.64966	0.04853	-0.03019	0.35784	0.17867	0.14894	-0.01163	-2.1459	-1.49624	-1.90689	-1.85836	-2.18636	-2.21655	-2.20982	-1.85198	-2.00291	-1.82424	-1.94586	-1.79692	-2.16496	-2.17659	PF3D7_1140700	1610	S	___2	SEQDHINDDDNNINS(0.682)Y(0.636)DDES(0.682)DVNFNNK	15	RSEQDHINDDDNNINSYDDESDVNFNNKKND	PF11_0418
PF3D7_1140700		conserved Plasmodium protein, unknown function	No	0.64966	0.04853	-0.03019	0.35784	0.17867	0.14894	-0.01163	-2.1459	-1.49624	-1.90689	-1.85836	-2.18636	-2.21655	-2.20982	-1.85198	-2.00291	-1.82424	-1.94586	-1.79692	-2.16496	-2.17659	PF3D7_1140700	1615	S	___2	SEQDHINDDDNNINS(0.682)Y(0.636)DDES(0.682)DVNFNNK	20	HINDDDNNINSYDDESDVNFNNKKNDYKGKR	PF11_0418
PF3D7_0702500		Plasmodium exported protein, unknown function	Yes	0.6496	0.19078	-0.08285	0.18586	0.53785	-0.8794	0.57607	3.74351	4.39311	3.74241	3.93319	3.87066	3.78781	3.39959	3.58545	3.72637	4.26422	4.67496	3.79556	2.25247	2.82854	PF3D7_0702500	66	S	___1	SSS(1)VTK	3	RSYKKRKGMRILKSSSVTKGRLYRGTVFDED	PF07_0008
PF3D7_1039000	FIKK10.2	serine/threonine protein kinase, FIKK family	Yes	0.649535	0.352068	0.67917	0.718928	0.51726	0.55403	0.92378	0.549685	1.19922	-0.0798492	0.272219	-0.27877	0.4004	0.0902443	0.809172	0.17914	0.6964	-0.6078	-0.0537701	-2.33424	-1.41046	PF3D7_1039000	354	S	___1	FDGDQENIT(0.008)S(0.873)S(0.118)FER	10	DIKKRRFDGDQENITSSFERTQKSVKYDSDE	PF10_0380
PF3D7_0214300		conserved Plasmodium protein, unknown function	No	0.649376	0.31915	0.09876	1.15017	-0.06481	0.00975	-0.05589	-0.991095	-0.341719	-1.4575	-1.13835	-1.30651	-1.20775	-1.21605	-0.0658798	-1.13664	-1.20145	-1.64456	-1.63481	-1.09232	-1.14821	PF3D7_0214300	1141	S	___1	NEQLS(1)DATLNR	5	EDQCLIDKNVRNEQLSDATLNRYFLECSQRN	PF02_0134;PFB0650w
PF3D7_1449500	ApiAP2	AP2 domain transcription factor, putative	No	0.64724	-0.22842	-0.06543	0.29748	-0.23148	0.00805	-0.03416	-2.37206	-1.72482	-2.84799	-3.07641	-2.56255	-2.62798	-2.90802	-2.61054	-2.52317	-2.75465	-2.87108	-2.86303	-2.82386	-2.85802	PF3D7_1449500	618	S	___1	YNENEYNFIFS(0.003)NEY(0.001)Y(0.001)S(0.434)DS(0.561)CQPNIDEYK	18	ENEYNFIFSNEYYSDSCQPNIDEYKTNFIDL	PF14_0471
PF3D7_0708800	HSP110c	heat shock protein 110	No	0.6462	-0.10506	0.39446	-0.0281	0.18938	-0.31612	0.11337	-3.55267	-2.90647	-3.20353	-3.30859	-3.34414	-2.94968	-3.26009	-3.28819	-3.53686	-3.34748	-3.23351	-3.54963	-3.02706	-2.91369	PF3D7_0708800	282	S	___1	FLVT(0.001)S(0.01)T(0.089)AS(0.9)DQQNGINNK	8	MGTGRLNKFLVTSTASDQQNGINNKVRIKLQ	PF07_0033
PF3D7_0202000	KAHRP	knob-associated histidine-rich protein	Yes	0.64244	0.29119	0.03421	0.72054	0.02832	0.1983	0.0056	1.06772	1.71016	1.94007	2.23126	1.92993	1.96414	2.13359	2.85413	1.84707	1.87539	2.579	2.7773	0.93078	0.93638	PF3D7_0202000	594	T	___2	EAS(0.715)T(0.219)T(0.068)EGAT(0.998)K	9	TSKGATKEASTTEGATKGASTTAGSTTGATT	PF02_0020;PFB0100c
PF3D7_0914900		BSD-domain protein, putative	No	0.640846	0.308889	0.48028	0.827745	0.585418	0.414051	0.20768	-0.647436	-0.00658989	-0.35111	-0.0422211	-0.65564	-0.17536	-0.761915	0.0658302	-1.03878	-0.453362	-1.18193	-0.767879	-0.85025	-0.64257	PF3D7_0914900	556	S	___1	FLDEIS(1)EANRS(1)ACDLEEPK	6	FQKISEYNTKFLDEISEANRSACDLEEPKSD	PFI0730w
PF3D7_0202000	KAHRP	knob-associated histidine-rich protein	Yes	0.64013	0.28606	0.4427	0.50174	0.54093	0.66496	0.26407	1.55406	2.19419	1.30705	1.59311	1.61712	2.05982	1.76973	2.27147	1.41575	1.95668	1.29034	1.9553	0.0782795	0.34235	PF3D7_0202000	578	S	___2	EATKEAS(0.963)T(0.033)S(0.004)KGATK	7	ATKEASTSKEATKEASTSKGATKEASTTEGA	PF02_0020;PFB0100c
PF3D7_1208900	PPM11	protein phosphatase, putative	No	0.637525	0.228918	0.288239	0.447555	0.03553	0.242818	0.0970802	-0.260145	0.37738	-0.100899	0.128019	0.0110912	0.29933	0.146805	0.59436	0.22933	0.26486	0.0270805	0.269899	-0.0890808	0.00799942	PF3D7_1208900	952	S	___1	GLHS(1)FVK	4	PDRSQWKDLENRGLHSFVKILEKVDIDGDSP	2277.t00090;MAL12P1.89;PFL0445w
PF3D7_0831700	HSP70x	heat shock protein 70	Yes	0.63534	0.41767	0.12496	0.75641	0.45936	0.59901	0.32879	2.27007	2.90541	2.49002	2.90769	1.79101	1.91597	2.47403	3.23044	2.25803	2.71739	2.37134	2.97035	2.31616	2.64495	PF3D7_0831700	108	S	___1	FS(1)ETTVQSDMK	2	ENTVFDAKRLIGRKFSETTVQSDMKHWPFTV	MAL7P1.228
PF3D7_1408600		40S ribosomal protein S8e, putative	No	0.63513	0.04986	-0.18727	0.63297	0.16865	0.7387	-0.14062	-4.87811	-4.24298	-4.37038	-4.32052	-4.32312	-4.51039	-4.67181	-4.03884	-4.60457	-4.43592	-4.48418	-3.74548	-4.16888	-4.3095	PF3D7_1408600	62	S	___1	LDS(0.968)GS(0.032)FSWPTFGISK	3	RGRGRNYKYRAIKLDSGSFSWPTFGISKNTR	PF14_0083
PF3D7_1343700	Kelch13	kelch protein K13	No	0.63486	0.75929	-0.03991	0.72093	0.21141	-0.13167	0.41108	-4.78804	-4.15318	-4.87551	-4.11622	-4.92258	-4.96249	-5.63288	-4.91195	-4.81107	-4.59966	-4.99416	-5.12583	-5.11025	-4.69917	PF3D7_1343700	74	S	___2	DS(0.656)LLES(0.742)IDMS(0.6)VLDS(0.002)NFDSK	2	NSFLLNNSSYGNVKDSLLESIDMSVLDSNFD	PF13_0238
PF3D7_0611400	SWIB	SWIB/MDM2 domain-containing protein	No	0.634816	0.30299	0.355589	0.675615	0.439109	0.393219	0.18599	0.951214	1.58603	1.00277	1.30576	0.925251	1.28084	0.837645	1.51326	0.834431	1.27354	0.773361	1.16658	0.98864	1.17463	PF3D7_0611400	405	S	___2	LNEMS(1)S(1)NDEYKNVQK	5	INEKEYLMNNKLNEMSSNDEYKNVQKKKQVY	2270.t00200;MAL6P1.116;PFF0560c
PF3D7_0611400	SWIB	SWIB/MDM2 domain-containing protein	No	0.634816	0.30299	0.355589	0.675615	0.439109	0.393219	0.18599	0.951214	1.58603	1.00277	1.30576	0.925251	1.28084	0.837645	1.51326	0.834431	1.27354	0.773361	1.16658	0.98864	1.17463	PF3D7_0611400	406	S	___2	LNEMS(1)S(1)NDEYKNVQK	6	NEKEYLMNNKLNEMSSNDEYKNVQKKKQVYN	2270.t00200;MAL6P1.116;PFF0560c
PF3D7_0616900		conserved Plasmodium protein, unknown function	No	0.63417	0.025198	-0.36474	0.23547	0.522728	-0.14868	-0.69378	-2.27052	-1.63635	-0.783529	-0.758331	-1.22446	-1.5892	-1.41875	-1.18328	-1.47263	-0.949902	-1.61874	-1.76742	-0.83811	-1.53189	PF3D7_0616900	1023	S	___1	FFSLYS(0.613)S(0.386)PS(0.001)PQYDNDEKNIYNNTNER	6	HFNIDEDNKKFFSLYSSPSPQYDNDEKNIYN	2270.t00057;MAL6P1.257;PFF0820w
PF3D7_1332800		eukaryotic translation initiation factor 6, putative	No	0.63337	0.07744	-0.24279	0.54859	-0.1309	-0.50847	-0.12764	-3.98633	-3.35296	-3.22441	-3.14697	-3.08148	-3.32427	-3.68734	-3.13875	-2.94903	-3.07993	-2.65913	-3.1676	-2.98763	-3.11527	PF3D7_1332800	240	S	___1	S(0.5)S(0.5)IIQTMI	1	NNITDNNMEDTFKYKSSIIQTMI________	PF13_0178
PF3D7_1332800		eukaryotic translation initiation factor 6, putative	No	0.63337	0.07744	-0.24279	0.54859	-0.1309	-0.50847	-0.12764	-3.98633	-3.35296	-3.22441	-3.14697	-3.08148	-3.32427	-3.68734	-3.13875	-2.94903	-3.07993	-2.65913	-3.1676	-2.98763	-3.11527	PF3D7_1332800	241	S	___1	S(0.5)S(0.5)IIQTMI	2	NITDNNMEDTFKYKSSIIQTMI_________	PF13_0178
PF3D7_1149000	Pf332	antigen 332, DBL-like protein	Yes	0.63133	0.18807	0.72488	0.83255	NaN	-0.08349	0.28062	-4.14075	-3.50942	-4.52505	-4.33698	-4.22697	-3.50209	-4.97472	-4.14217	-6.00937	NaN	-4.16174	-4.24523	-4.92847	-4.64785	PF3D7_1149000	2377	S	___2	VS(0.002)VHEGS(0.283)T(0.34)T(0.374)EQILDES(0.002)VAEEIVEEEVS(1)VDDK	27	ILDESVAEEIVEEEVSVDDKIIEEEVSVDEV	PF11_0506;PF11_0507
PF3D7_0402100		Plasmodium exported protein (PHISTb), unknown function	Yes	0.62892	0.41637	0.48936	0.68625	0.47414	0.567539	0.28471	1.35655	1.98547	1.34052	1.75689	1.31734	1.8067	1.547	2.23325	1.4079	1.88204	0.998741	1.56628	1.44521	1.72992	PF3D7_0402100	84	S	___1	LTDVINYGEGS(1)LLK	11	GKLYKLTDVINYGEGSLLKQVPKEESENSNN	MAL4P1.19;PFD0095c
PF3D7_1222300	GRP94	endoplasmin, putative	No	0.628235	0.226349	0.30707	0.464756	0.224879	0.4412	0.040842	0.160505	0.78874	0.24942	0.475769	0.18264	0.48971	0.143785	0.608541	0.21487	0.439749	0.05723	0.49843	0.326559	0.367401	PF3D7_1222300	542	S	___1	S(0.997)IS(0.003)LDTYIEHMKPDQK	1	KIAKLLLFKTMQYPKSISLDTYIEHMKPDQK	2277.t00214;MAL12P1.214;PFL1070c
PF3D7_0412300		phosphopantothenoylcysteine synthetase, putative	No	0.6278	-0.19947	-0.19537	-0.03228	0.00453	0.1286	-0.05339	-2.99498	-2.36718	-2.62555	-2.82502	-2.69671	-2.89208	-2.59785	-2.63013	-2.82418	-2.81965	-2.49515	-2.36655	-2.67038	-2.72377	PF3D7_0412300	442	S	___1	IDS(0.032)NY(0.028)S(0.755)PLS(0.185)IQLCLTPK	6	IPYDEMHENKIDSNYSPLSIQLCLTPKFYKI	MAL4P2.55;PFD0610w
PF3D7_0215300	ACS8	acyl-CoA synthetase	Yes	0.627525	0.07785	0.57708	0.537666	0.323318	0.52672	0.25407	-0.106945	0.52058	-1.66004	-1.58219	-0.211849	0.365231	-0.184635	0.353031	-0.302469	0.0208492	-0.112959	0.413761	-0.18202	0.0720501	PF3D7_0215300	784	S	___1	SYFS(0.002)RLS(0.998)QK	7	ENDQEKSKKSYFSRLSQKRKSRSQEKNKSTS	PF02_0144;PFB0695c
PF3D7_0401800	PfD80	Plasmodium exported protein (PHISTb), unknown function	Yes	0.6263	0.48777	0.28918	0.9819	0.49887	0.69353	0.14853	4.81402	5.44032	4.35268	4.84045	4.93405	5.22323	4.17398	5.15588	4.39415	4.89302	4.24871	4.94224	4.06772	4.21625	PF3D7_0401800	133	S	___2	S(1)AS(1)AAS(0.956)T(0.036)T(0.007)R	1	TASTASTASAASTTRSASAASTTRSASAAST	MAL4P1.16;PFD0080c
PF3D7_0623100	NAB2	nuclear polyadenylated RNA-binding protein NAB2, putative	No	0.62539	0.139208	-0.144	-0.008604	0.217199	-0.307541	0.093992	-1.21214	-0.58675	-0.987749	-0.848541	-0.93047	-1.07447	-0.996996	-1.0056	-0.820221	-0.603022	-0.881929	-1.18947	-0.964481	-0.870489	PF3D7_0623100	120	S	___1	VS(0.024)S(0.976)AHNK	3	YSKSNRSRDSKNRVSSAHNKKGGEDDFDKRN	2270.t00119;MAL6P1.198;PFF1110c
PF3D7_1248500		bax inhibitor 1, putative	No	0.62348	-0.19736	0.00877	-0.15232	-0.16963	-0.05353	0.13545	-2.50521	-1.88173	-1.7753	-1.97266	-1.5126	-1.50383	-1.33995	-1.49227	-1.32526	-1.49489	-1.1049	-1.15843	-1.40925	-1.2738	PF3D7_1248500	54	T	___1	T(0.056)NIT(0.944)ANGGLYDEFSLNEFSSTK	4	NSGQKGYYYDARTNITANGGLYDEFSLNEFS	2277.t00465;MAL12P1.464;PFL2325c
PF3D7_0702500		Plasmodium exported protein, unknown function	Yes	0.62217	0.37579	0.42416	0.58522	0.40129	0.58297	0.04778	4.75232	5.37449	4.47868	4.85447	4.58059	5.00475	4.51452	5.09974	4.27231	4.6736	4.13102	4.71399	1.65915	1.70693	PF3D7_0702500	217	S	___1	HYSLGGQPS(0.978)S(0.022)S(0.001)GR	9	QGSTSSRHYSLGGQPSSSGRSFSGSKYNTSN	PF07_0008
PF3D7_0408300	ZRANB2	zinc finger Ran-binding domain-containing protein 2, putative	No	0.621421	-0.140392	0.11318	0.61559	0.49509	0.06261	-0.00686	-1.23438	-0.612959	-0.36208	-0.502472	-1.14961	-1.03643	-1.3453	-0.72971	-1.38009	-0.885	-1.44061	-1.378	-1.38789	-1.39475	PF3D7_0408300	221	S	___1	YDRS(0.5)S(0.5)KYDGK	4	DKYDRSSKYDDKYDRSSKYDGKYDRSSKYDD	MAL4P2.19;PFD0405c;PFD0405w
PF3D7_0408300	ZRANB2	zinc finger Ran-binding domain-containing protein 2, putative	No	0.621421	-0.140392	0.11318	0.61559	0.49509	0.06261	-0.00686	-1.23438	-0.612959	-0.36208	-0.502472	-1.14961	-1.03643	-1.3453	-0.72971	-1.38009	-0.885	-1.44061	-1.378	-1.38789	-1.39475	PF3D7_0408300	222	S	___1	YDRS(0.5)S(0.5)KYDGK	5	KYDRSSKYDDKYDRSSKYDGKYDRSSKYDDK	MAL4P2.19;PFD0405c;PFD0405w
PF3D7_0702500		Plasmodium exported protein, unknown function	Yes	0.62098	0.29924	0.37779	0.57365	0.31745	0.27927	0.04173	1.86277	2.48375	1.64005	1.93929	1.90067	2.27846	1.94657	2.52022	1.93803	2.25548	1.46778	1.74705	1.4207	1.46243	PF3D7_0702500	222	S	___1	S(0.999)FS(0.001)GSK	1	SRHYSLGGQPSSSGRSFSGSKYNTSNLASSS	PF07_0008
PF3D7_0202100	LSAP2	liver stage associated protein 2	Yes	0.620485	0.34754	0.32211	0.644826	0.28047	0.380149	-0.108359	0.310635	0.93112	0.91716	1.2647	0.85899	1.1811	0.958364	1.60319	0.7609	1.04137	0.765991	1.14614	0.842459	0.7341	PF3D7_0202100	96	S	___1	GS(0.104)GS(0.896)EKNVYLSNK	4	RNSRKFAEGYMKGSGSEKNVYLSNKNKEINM	PF02_0021;PFB0105c
PF3D7_0401800	PfD80	Plasmodium exported protein (PHISTb), unknown function	Yes	0.620335	0.492449	0.44492	1.23052	0.348789	0.76513	-0.2645	0.281435	0.90177	0.151331	0.64378	-0.557709	-0.112789	0.172245	1.40276	0.02985	0.378639	-0.37851	0.38662	0.21196	-0.0525398	PF3D7_0401800	282	S	___3	LPSTGS(0.98)T(0.019)IRFPSTGSSR	6	TGSTSGSTTRLPSTGSTIRFPSTGSSRLEDY	MAL4P1.16;PFD0080c
PF3D7_0730900	PTP4	EMP1-trafficking protein	Yes	0.618065	0.210178	0.586069	0.831375	0.357929	0.34116	-0.3127	-0.797295	-0.17923	-0.51169	-0.301512	-0.217449	0.36862	-0.717964	0.113411	-0.97047	-0.612541	-0.673229	-0.332069	-1.63199	-1.94469	PF3D7_0730900	676	S	___1	KEVS(1)VPR	4	SEFKNNFDGGINKEVSVPRLSVNEFENNDDV	MAL7P1.171
PF3D7_0702500		Plasmodium exported protein, unknown function	Yes	0.617675	0.538389	0.475559	0.799604	0.61899	0.57489	0.18058	0.396915	1.01459	0.37443	0.912819	0.383291	0.85885	0.619286	1.41889	0.28677	0.90576	0.33671	0.9116	0.0888996	0.26948	PF3D7_0702500	196	S	___2	NYSLGNLS(0.994)T(0.184)GT(0.015)T(0.453)S(0.349)QGS(0.004)T(0.001)SSR	8	THDLPAGRNYSLGNLSTGTTSQGSTSSRHYS	PF07_0008
PF3D7_1410400	RAP1	rhoptry-associated protein 1	No	0.61744	-0.10926	-0.25701	-0.09011	0.00259	-0.22674	-0.63712	-2.00533	-1.38789	-1.76972	-1.87898	-1.92881	-2.18582	-2.2043	-2.29441	-1.92057	-1.91798	-2.06446	-2.2912	-1.86463	-2.50175	PF3D7_1410400	181	S	___1	S(0.5)AS(0.5)VAGIVGADEEAPPAPK	1	ESNSSEESTTKSSKRSASVAGIVGADEEAPP	PF14_0102
PF3D7_1453900		conserved Plasmodium protein, unknown function	No	0.61682	0.32735	0.05674	-0.04543	0.23544	0.24066	-0.0063	-2.23433	-1.61751	-2.01086	-1.68351	-1.91222	-1.85548	-1.88398	-1.92941	-2.04122	-1.80578	-2.13351	-1.89285	-2.02233	-2.02863	PF3D7_1453900	132	S	___2	CY(0.034)DVCT(0.293)MS(0.836)LDES(0.836)EHEIVMDNDNER	8	NIVEENKKCYDVCTMSLDESEHEIVMDNDNE	PF14_0512
PF3D7_1453900		conserved Plasmodium protein, unknown function	No	0.61682	0.32735	0.05674	-0.04543	0.23544	0.24066	-0.0063	-2.23433	-1.61751	-2.01086	-1.68351	-1.91222	-1.85548	-1.88398	-1.92941	-2.04122	-1.80578	-2.13351	-1.89285	-2.02233	-2.02863	PF3D7_1453900	136	S	___2	CYDVCTMSLDES(1)EHEIVMDNDNER	12	ENKKCYDVCTMSLDESEHEIVMDNDNERKGV	PF14_0512
PF3D7_0701600	MC-2TM	Pfmc-2TM Maurer's cleft two transmembrane protein	Yes	0.61617	-0.25068	0.5851	0.32819	-0.09611	0.31653	-0.09328	-1.96276	-1.34659	-1.9735	-2.22418	0.19096	0.77606	-1.45605	-1.12786	-1.82705	-1.92316	-1.81345	-1.49692	-1.84659	-1.93987	PF3D7_0701600	86	S	___1	KNPDDQIS(0.029)DLVS(0.968)LVDNMNIT(0.003)QEK	12	GSKKKNPDDQISDLVSLVDNMNITQEKKNEI	MAL7P1.5
PF3D7_1416600		conserved Plasmodium protein, unknown function	No	0.616146	0.412239	0.494862	0.540837	0.50169	0.390189	0.375901	0.134445	0.750591	0.0332603	0.445499	0.0681095	0.562971	0.0987244	0.639561	-0.0501308	0.451559	0.0677013	0.45789	-0.00608063	0.36982	PF3D7_1416600	2931	S	___1	FS(0.274)PS(0.726)FGNINNEDIK	4	KSENCINNNIRKFSPSFGNINNEDIKNNNYK	PF14_0165
PF3D7_0113200		Plasmodium exported protein, unknown function	Yes	0.61598	0.28332	0.62921	0.5993	0.38176	0.46395	0.2442	4.29306	4.90904	4.1769	4.46022	1.65199	2.2812	4.0764	4.6757	3.81008	4.19184	3.9162	4.38015	3.66243	3.90663	PF3D7_0113200	299	S	___1	QDS(1)QTNHYGR	3	ENKNKNKIINYPRQDSQTNHYGRYTSRTNNQ	MAL1P3.08;PFA0630c
PF3D7_1447800		calponin homology domain-containing protein, putative	No	0.6158	-0.14692	0.5195	0.08228	0.51833	0.0224	-0.16563	-2.038	-1.4222	-1.06215	-1.20907	-2.14668	-1.62718	-1.50006	-1.41778	-2.15017	-1.63184	-1.80234	-1.77994	-1.57359	-1.73922	PF3D7_1447800	1955	S	___3	T(0.138)KNEFS(0.859)DQGS(0.004)HDSSIQQTNLQLLK	6	LHKQQKDDLKTKNEFSDQGSHDSSIQQTNLQ	PF14_0454
PF3D7_1447800		calponin homology domain-containing protein, putative	No	0.6158	-0.14692	0.5195	0.08228	0.51833	0.0224	-0.16563	-2.038	-1.4222	-1.06215	-1.20907	-2.14668	-1.62718	-1.50006	-1.41778	-2.15017	-1.63184	-1.80234	-1.77994	-1.57359	-1.73922	PF3D7_1447800	1959	S	___3	T(0.359)KNEFS(0.647)DQGS(0.952)HDS(0.022)S(0.02)IQQTNLQLLK	10	QKDDLKTKNEFSDQGSHDSSIQQTNLQLLKS	PF14_0454
PF3D7_1447800		calponin homology domain-containing protein, putative	No	0.6158	-0.14692	0.5195	0.08228	0.51833	0.0224	-0.16563	-2.038	-1.4222	-1.06215	-1.20907	-2.14668	-1.62718	-1.50006	-1.41778	-2.15017	-1.63184	-1.80234	-1.77994	-1.57359	-1.73922	PF3D7_1447800	1962	S	___3	NEFS(0.858)DQGS(0.678)HDS(0.742)S(0.712)IQQT(0.01)NLQLLK	11	DLKTKNEFSDQGSHDSSIQQTNLQLLKSKST	PF14_0454
PF3D7_1447800		calponin homology domain-containing protein, putative	No	0.6158	-0.14692	0.5195	0.08228	0.51833	0.0224	-0.16563	-2.038	-1.4222	-1.06215	-1.20907	-2.14668	-1.62718	-1.50006	-1.41778	-2.15017	-1.63184	-1.80234	-1.77994	-1.57359	-1.73922	PF3D7_1447800	1963	S	___3	NEFS(0.858)DQGS(0.678)HDS(0.742)S(0.712)IQQT(0.01)NLQLLK	12	LKTKNEFSDQGSHDSSIQQTNLQLLKSKSTN	PF14_0454
PF3D7_0702500		Plasmodium exported protein, unknown function	Yes	0.61528	0.50389	0.46634	0.64954	0.40851	0.41892	0.22967	1.94737	2.56265	1.94933	2.45322	2.02319	2.48953	2.33941	2.98895	2.09838	2.50689	2.13399	2.55291	1.51026	1.73993	PF3D7_0702500	196	S	___1	NYSLGNLS(0.994)T(0.184)GT(0.015)T(0.453)S(0.349)QGS(0.004)T(0.001)SSR	8	THDLPAGRNYSLGNLSTGTTSQGSTSSRHYS	PF07_0008
PF3D7_0826900		conserved Plasmodium protein, unknown function	No	0.615007	-0.191	-0.18027	-0.14333	-0.15808	-0.057371	-0.18972	-0.976156	-0.361149	-0.95573	-1.14673	-1.02439	-1.20466	-1.00318	-1.14651	-1.07024	-1.22832	-0.964249	-1.02162	-0.97451	-1.16423	PF3D7_0826900	524	S	___1	IQNNNNMS(0.89)DENNS(0.11)FVLDPLVSDENK	8	QQIKNDSKIQNNNNMSDENNSFVLDPLVSDE	MAL8P1.20
PF3D7_0826700	RACK1	receptor for activated c kinase	No	0.61198	-0.44148	0.18926	-0.44736	-0.36573	-0.01602	0.54153	-4.49769	-3.88571	-3.96788	-4.40936	-4.35958	-4.17032	-3.83978	-4.28714	-4.17033	-4.53606	-4.39026	-4.40628	-4.60922	-4.06769	PF3D7_0826700	63	T	___1	LIVWNINT(0.001)DDDS(0.018)GEIGT(0.981)AK	17	IVWNINTDDDSGEIGTAKKSLTGHSQAINDV	PF08_0019
PF3D7_1453900		conserved Plasmodium protein, unknown function	No	0.61168	0.38285	-0.0033	0.04733	0.26947	0.26514	0.11027	-2.90335	-2.29167	-2.98773	-2.60488	-2.76949	-2.77279	-2.75321	-2.70588	-2.81544	-2.54597	-3.03922	-2.77408	-3.00726	-2.89699	PF3D7_1453900	130	T	___2	CY(0.016)DVCT(0.66)MS(0.66)LDES(0.664)EHEIVMDNDNER	6	NNNIVEENKKCYDVCTMSLDESEHEIVMDND	PF14_0512
PF3D7_1221300		conserved Plasmodium protein, unknown function	No	0.60981	0.03783	-0.14099	-0.5183	1.16717	-0.27951	0.17389	-4.08162	-3.47181	-3.22911	-3.19128	-2.83956	-2.98055	-3.12222	-3.64052	-4.17449	-3.00732	-2.80345	-3.08296	-3.27499	-3.1011	PF3D7_1221300	676	S	___1	DS(0.533)NES(0.112)LY(0.025)DILPLY(0.33)DIQGK	2	TLKPTRTKFSTFKKDSNESLYDILPLYDIQG	2277.t00205;MAL12P1.205;PFL1025c
PF3D7_1026000		conserved Plasmodium protein, unknown function	No	0.606755	0.170538	0.3011	0.706475	0.488911	0.493629	0.284521	0.690895	1.29765	0.757961	0.928499	0.60968	0.91078	0.598845	1.30532	0.577629	1.06654	0.384041	0.87767	0.589819	0.87434	PF3D7_1026000	218	S	___1	NNIHDNKENS(1)PCNIIDVNNDDKLK	10	DENCYKNNIHDNKENSPCNIIDVNNDDKLKK	PF10_0257
PF3D7_0401800	PfD80	Plasmodium exported protein (PHISTb), unknown function	Yes	0.60657	0.46247	0.28762	0.93395	0.5145	0.66313	0.12933	4.86717	5.47374	4.49359	4.95606	5.01836	5.30598	4.3017	5.23565	4.4643	4.9788	4.35322	5.01635	4.16985	4.29918	PF3D7_0401800	138	S	___2	SASAAS(0.999)T(0.998)T(0.003)R	6	STASAASTTRSASAASTTRSASAASTTRSAS	MAL4P1.16;PFD0080c
PF3D7_0936800		Plasmodium exported protein (PHISTc), unknown function	Yes	0.60409	0.25476	0.089369	0.753646	0.750701	0.436581	0.482629	1.05861	1.6627	0.79862	1.05338	0.292341	0.38171	0.703344	1.45699	0.713129	1.46383	0.53903	0.975611	0.610991	1.09362	PF3D7_0936800	74	S	___1	SHS(0.729)T(0.21)S(0.061)DPK	3	LAEASPEEHNNLRSHSTSDPKKNEEKSLSDE	PFI1780w
PF3D7_1149100		Plasmodium exported protein, unknown function	Yes	0.603511	0.35507	0.521111	0.425655	0.498769	0.295659	0.13065	-1.25011	-0.646599	-1.39936	-1.04429	-1.28813	-0.767019	-0.848425	-0.42277	-1.23264	-0.733871	-1.15986	-0.864201	-1.27614	-1.14549	PF3D7_1149100;PF3D7_1149100	416;417	S	___1	NST(0.002)NDS(0.997)IKTPK	6	EESLNKLSTKNSTNDSIKTPKKKSNNKNTKE	PF11_0508;PF3D7_1149100.1;PF3D7_1149100.2
PF3D7_1149000	Pf332	antigen 332, DBL-like protein	Yes	0.602775	0.639359	0.28417	0.148657	0.352469	0.3907	0.043701	0.384705	0.98748	0.675211	1.31457	0.61681	0.90098	0.704994	0.853651	0.58411	0.936579	-1.56628	-1.17558	0.66655	0.710251	PF3D7_1149000	79	S	___1	S(1)LADYKDIFQGK	1	KHDESCDEFCDAWNRSLADYKDIFQGKDMWN	PF11_0506;PF11_0507
PF3D7_0401800	PfD80	Plasmodium exported protein (PHISTb), unknown function	Yes	0.601627	0.14711	0.130021	0.505591	0.51879	0.33827	-0.13232	-0.481226	0.120401	-1.321	-1.17389	-1.08488	-0.954859	-1.24327	-0.737679	-1.18982	-0.67103	-1.74381	-1.40554	-1.39833	-1.53065	PF3D7_0401800	76	T	___2	SPS(0.997)T(0.694)AS(0.298)T(0.009)S(0.002)T(0.001)SLR	4	SSCSSLASTTKRSPSTASTSTSLRSASTAST	MAL4P1.16;PFD0080c
PF3D7_0501200	PIESP2	parasite-infected erythrocyte surface protein	Yes	0.601321	0.514479	0.594912	0.525411	0.28137	0.42514	0.170741	-1.31878	-0.717459	-0.84306	-0.328581	-0.871201	-0.276289	-1.03091	-0.505499	-1.46421	-1.18284	-1.01758	-0.59244	-1.06734	-0.896599	PF3D7_0501200	58	T	___1	NT(1)FNFLK	2	RTLADFNDMFANQKNTFNFLKHINHYKNEQD	MAL5P1.13;PFE0060w
PF3D7_1107300	PAIP1	polyadenylate-binding protein-interacting protein 1, putative	No	0.600914	0.229547	0.155401	0.311516	0.342369	0.10845	-0.01235	-0.220594	0.38032	0.443001	0.672548	0.39361	0.549011	0.479805	0.791321	0.29961	0.641979	0.582071	0.690521	0.55196	0.53961	PF3D7_1107300	2298	S	___2	NDNKLEKS(1)S(1)DEHMNEK	8	EICEKNEKNDNKLEKSSDEHMNEKISDNVKV	PF11_0086
PF3D7_1107300	PAIP1	polyadenylate-binding protein-interacting protein 1, putative	No	0.600914	0.229547	0.155401	0.311516	0.342369	0.10845	-0.01235	-0.220594	0.38032	0.443001	0.672548	0.39361	0.549011	0.479805	0.791321	0.29961	0.641979	0.582071	0.690521	0.55196	0.53961	PF3D7_1107300	2299	S	___2	NDNKLEKS(1)S(1)DEHMNEK	9	ICEKNEKNDNKLEKSSDEHMNEKISDNVKVN	PF11_0086
PF3D7_0730300	ApiAP2	AP2 domain transcription factor AP2-L, putative	No	0.600637	-0.0192318	-0.06509	0.258767	0.24423	0.091541	-0.454759	-0.871166	-0.270529	-0.0201988	-0.0394306	-0.518099	-0.583189	-0.453505	-0.194738	-0.40382	-0.15959	-0.97595	-0.884409	0.0450993	-0.40966	PF3D7_0730300	947	S	___1	RNS(1)S(1)DGQNKHLEPGVQK	3	GMDVFEPNFFELKRNSSDGQNKHLEPGVQKK	PF07_0126
PF3D7_0730300	ApiAP2	AP2 domain transcription factor AP2-L, putative	No	0.600637	-0.0192318	-0.06509	0.258767	0.24423	0.091541	-0.454759	-0.871166	-0.270529	-0.0201988	-0.0394306	-0.518099	-0.583189	-0.453505	-0.194738	-0.40382	-0.15959	-0.97595	-0.884409	0.0450993	-0.40966	PF3D7_0730300	948	S	___1	RNS(1)S(1)DGQNKHLEPGVQK	4	MDVFEPNFFELKRNSSDGQNKHLEPGVQKKI	PF07_0126
PF3D7_0532300		Plasmodium exported protein (PHISTb), unknown function	Yes	0.59926	0.22173	0.20112	0.76881	0.39702	0.24465	-0.01227	2.26621	2.86547	2.21476	2.43649	3.15851	3.35963	2.65262	3.42143	2.31804	2.71506	2.71499	2.95964	1.29731	1.28504	PF3D7_0532300	347	Y	___1	NYSTHENT(0.003)Y(0.997)PTLK	9	KNGKFLKNYSTHENTYPTLKTLLEKYAITDD	MAL5P1.314;PFE1600w
PF3D7_0113200		Plasmodium exported protein, unknown function	Yes	0.59683	0.42329	0.410452	0.5132	0.489339	0.477079	0.184252	1.4071	2.00393	0.89259	1.31588	0.0569897	0.467442	1.14211	1.65531	0.832621	1.32196	0.693621	1.1707	0.678919	0.863171	PF3D7_0113200	341	T	___1	SNNPPRQDS(0.028)QT(0.923)S(0.049)YYGR	11	RYTSRSNNPPRQDSQTSYYGRYTSRTNNQHR	MAL1P3.08;PFA0630c
PF3D7_1201000		Plasmodium exported protein (PHISTb), unknown function	Yes	0.59658	0.30093	0.08837	0.32126	0.35906	-0.09119	0.23004	-1.64481	-1.04823	-1.16666	-0.86573	-1.46165	-1.37328	-1.53558	-1.21432	-1.57509	-1.21603	-2.19114	-2.28233	-1.47635	-1.24631	PF3D7_1201000	535	S	___1	ELEEVIS(1)VEDITNISLK	7	TATINKDIKELEEVISVEDITNISLKITSNE	2277.t00010;MAL12P1.10;PFL0050c
PF3D7_0603600		conserved Plasmodium protein, unknown function	No	0.596295	0.485779	0.50802	0.822476	0.35216	0.47536	0.30633	0.977415	1.57371	0.799961	1.28574	0.81778	1.3258	0.839384	1.66186	0.73304	1.0852	0.8088	1.28416	0.75676	1.06309	PF3D7_0603600	785	S	___1	IHILS(1)EDDNKR	5	SNNMISNKMKKIHILSEDDNKRNINVDKRKG	2270.t00333;MAL6P1.39;PFF0175c
PF3D7_0730900	PTP4	EMP1-trafficking protein	Yes	0.59615	0.36956	0.65205	0.60199	0.41499	0.54289	0.49151	3.79842	4.39457	3.88363	4.25319	4.59019	5.24224	3.53746	4.13945	3.30503	3.72002	3.23463	3.77752	3.36022	3.85173	PF3D7_0730900	1178	S	___1	VEKEMS(1)IHDGMK	6	YKHLTDEENKVEKEMSIHDGMKGQKYGSKNV	MAL7P1.171
PF3D7_0220800	CLAG2	cytoadherence linked asexual protein 2	Yes	0.59458	0.19864	0.10267	-0.00335	-0.07198	0.20323	-0.15507	-2.69699	-2.10241	-2.22649	-2.02785	-2.15451	-2.05184	-1.84663	-1.84998	-2.48953	-2.56151	-1.90102	-1.69779	-2.40404	-2.55911	PF3D7_0220800	1418	S	___2	LHEES(0.022)Y(0.012)S(0.024)QET(0.453)QS(0.595)DNT(0.894)DDEKDNDLPDTELMITR	12	NYEKLHEESYSQETQSDNTDDEKDNDLPDTE	PF02_0195;PFB0935w
PF3D7_0220800	CLAG2	cytoadherence linked asexual protein 2	Yes	0.59458	0.19864	0.10267	-0.00335	-0.07198	0.20323	-0.15507	-2.69699	-2.10241	-2.22649	-2.02785	-2.15451	-2.05184	-1.84663	-1.84998	-2.48953	-2.56151	-1.90102	-1.69779	-2.40404	-2.55911	PF3D7_0220800	1421	T	___2	LHEES(0.022)Y(0.012)S(0.024)QET(0.453)QS(0.595)DNT(0.894)DDEKDNDLPDTELMITR	15	KLHEESYSQETQSDNTDDEKDNDLPDTELMI	PF02_0195;PFB0935w
PF3D7_0404600		conserved Plasmodium membrane protein, unknown function	No	0.594356	0.323469	0.424221	0.304895	0.409289	0.41008	0.25012	0.445324	1.03968	0.29908	0.622549	0.19393	0.618151	0.343325	0.64822	0.30533	0.714619	0.10697	0.51705	0.32444	0.57456	PF3D7_0404600	3018	S	___1	NIFNNNLS(1)DNNENVQNKEIEK	8	VNIVLEQKNIFNNNLSDNNENVQNKEIEKKN	MAL4P1.44;PFD0220c;PFD0220w;PFD0225w
PF3D7_1334500	MSRP6	MSP7-like protein	Yes	0.58975	0.81938	0.90421	0.90219	0.29282	0.56031	0.39068	-2.48806	-1.89831	-2.41478	-1.5954	-2.32924	-1.42503	-2.20761	-1.30542	-3.36267	-3.06985	-2.10171	-1.5414	-2.59296	-2.20228	PF3D7_1334500	405	S	___1	NHSNYNYKPINQENLS(1)MYFNNNNK	16	NHSNYNYKPINQENLSMYFNNNNKKKNKKNS	PF13_0192
PF3D7_1447800		calponin homology domain-containing protein, putative	No	0.58966	-0.09408	0.13078	0.98303	0.59415	0.65892	0.1119	-2.9321	-2.34244	-1.88088	-1.97496	-2.58072	-2.44994	-2.80344	-1.82041	-3.11725	-2.5231	-3.12143	-2.46251	-2.5504	-2.4385	PF3D7_1447800	415	S	___1	FS(0.272)S(0.728)NIS(1)CYDDNKLYNK	6	NILSEVTWNRFSSNISCYDDNKLYNKGLHNN	PF14_0454
PF3D7_1433400	PHD2	conserved Plasmodium membrane protein, unknown function	No	0.58964	0.02871	-0.20335	0.1349	-0.0459	-0.13628	0.06627	-4.04403	-3.45439	-2.91441	-2.8857	-2.20962	-2.41297	-2.49364	-2.35874	-2.49446	-2.54036	-1.96193	-2.09821	-2.47633	-2.41006	PF3D7_1433400	5482	S	___1	LRS(1)FLELAR	3	RRRVKPSIKLFSKLRSFLELARIIVDQMKKR	PF14_0315
PF3D7_0109000	PHIL1	photosensitized INA-labeled protein PHIL1, putative	No	0.589256	0.075937	-0.05387	0.215705	0.17271	-0.219219	-0.14389	-0.247776	0.34148	0.405321	0.481258	0.19179	0.13792	0.250565	0.46627	0.24531	0.41802	0.22043	0.00121117	0.46508	0.32119	PF3D7_0109000	167	S	___1	S(1)KGEANSEWSNAFVTR	1	QSIPIKSSPNVFKRRSKGEANSEWSNAFVTR	MAL1P2.17;PFA0440w
PF3D7_1449100		conserved Plasmodium protein, unknown function	No	0.58893	-0.02253	-0.17404	0.33717	0.04635	0.23181	-0.26384	-3.75769	-3.16876	-2.49854	-2.52107	-2.60378	-2.77782	-2.55956	-2.22239	-2.48591	-2.43956	-2.42399	-2.19218	-2.16996	-2.4338	PF3D7_1449100	81	S	___1	TSAMGINIINKNS(1)IEDK	13	LTRTSAMGINIINKNSIEDKKLNESYNVKNY	PF14_0468
PF3D7_0501300	SBP1	skeleton-binding protein 1	Yes	0.588886	0.682327	0.36297	0.375374	0.134911	0.27986	-0.22762	-0.0723362	0.51655	0.193251	0.875578	0.551781	0.914751	0.635336	1.01071	0.691959	0.82687	0.60803	0.88789	-1.40797	-1.63559	PF3D7_0501300	328	S	___2	TQQNPQQNAQQNTQQNT(0.009)QQQS(0.404)T(0.476)T(0.111)KS(0.833)T(0.142)T(0.025)K	25	QQNTQQNTQQQSTTKSTTKTVARET______	MAL5P1.14;PFE0065w
PF3D7_1001400	XL1	exported lipase 1	Yes	0.58878	-0.29731	-0.32543	-0.74879	0.79019	-0.46646	-0.02461	-4.05504	-3.46626	-3.72645	-4.02376	-3.88314	-4.20857	-3.59272	-4.34151	-4.38665	-3.59646	-5.97725	-6.44371	-3.87858	-3.90319	PF3D7_1001400	331	S	___1	DENEIT(0.007)DVS(0.026)NVNDIS(0.85)VIY(0.117)NNIFK	15	KDENEITDVSNVNDISVIYNNIFKILYDKIE	PF10_0018
PF3D7_1149200	RESA3	ring-infected erythrocyte surface antigen	Yes	0.58878	0.203398	-0.29202	0.492605	0.112358	-0.117909	-0.134029	-1.59462	-1.00584	-0.465939	-0.262541	-1.64035	-1.93237	-0.438885	0.0537205	-0.657209	-0.544851	-0.50621	-0.624119	-0.529211	-0.66324	PF3D7_1149200	382	S	___1	VS(0.983)INNS(0.017)AINYYDAVKDGK	2	HQINEYGDILPSLKVSINNSAINYYDAVKDG	PF11_0509
PF3D7_1248500		bax inhibitor 1, putative	No	0.58799	-0.25361	-0.37487	0.1525	0.14897	-0.21021	-0.54384	1.70412	2.29211	3.57434	3.32073	3.16277	2.7879	3.25352	3.40602	3.33321	3.48218	3.03489	2.82468	3.92258	3.37874	PF3D7_1248500	40	S	___1	DKENYDKS(0.003)NS(0.997)GQK	10	NYSQNKDKENYDKSNSGQKGYYYDARTNITA	2277.t00465;MAL12P1.464;PFL2325c
PF3D7_1135100	PPM8	protein phosphatase PPM8, putative	No	0.58714	0.39871	0.03108	0.45607	0.21113	0.12313	0.2189	-2.6531	-2.06596	-2.27805	-1.87934	-2.21055	-2.17947	-2.01422	-1.55815	-2.44707	-2.23594	-1.83255	-1.70942	-2.30712	-2.08822	PF3D7_1135100	361	S	___1	YFS(0.999)LNS(0.001)NEYK	3	ANRILEERLTETRYFSLNSNEYKNFQTSNPN	PF11_0362
PF3D7_1436300	PTEX150	translocon component PTEX150	No	0.586017	0.235548	0.35103	0.140644	0.263279	0.195761	0.109111	-0.0790462	0.506971	0.156881	0.392429	-0.179989	0.171041	0.156006	0.29665	0.0161095	0.279388	-0.25849	-0.0627289	0.170729	0.27984	PF3D7_1436300	817	S	___1	KNS(1)EYDLYDDDDKEGGNFK	3	IYDTKENLIKFLKKNSEYDLYDDDDKEGGNF	PF14_0344;Pf112
PF3D7_1127800		conserved Plasmodium protein, unknown function	No	0.58532	1.04091	0.65344	0.2693	0.02048	1.08114	-0.02386	-4.37051	-3.78519	-4.63124	-3.59033	-4.03802	-3.38458	-4.10528	-3.83598	-3.89806	-3.87758	-4.71815	-3.63701	-4.42167	-4.44553	PF3D7_1127800	820	T	___1	IS(0.5)DIT(0.5)NIMEDQNVVASEK	5	CMTFSNVKKRKISDITNIMEDQNVVASEKAI	PF11_0289
PF3D7_0113200		Plasmodium exported protein, unknown function	Yes	0.58489	0.28332	0.58065	0.3582	0.53517	0.51857	0.3123	4.27649	4.86138	3.44285	3.72617	2.72061	3.30126	3.55026	3.90846	3.32147	3.85664	2.82088	3.33945	3.01624	3.32854	PF3D7_0113200	393	S	___1	HES(1)LHSYNIK	3	VVYNDKIRKSNNRHESLHSYNIKETPKKNKK	MAL1P3.08;PFA0630c
PF3D7_0206300	AROM	pentafunctional AROM polypeptide, putative, pseudogene	No	0.58476	0.00535	0.25446	0.31242	0.27394	0.40498	0.14686	-2.94462	-2.35986	-2.8702	-2.86485	-2.65039	-2.39593	-3.15156	-2.83914	-3.14494	-2.871	-3.0615	-2.65652	-2.90697	-2.76011	PF3D7_0206300	1452	T	___1	GT(1)NEHMMQR	2	GNNNIIKNDDSASKGTNEHMMQRINDAETTQ	PF02_0059;PF02_0060;PF3D7_0206400;PFB0279w;PFB0280w
PF3D7_0935900	REX1	ring-exported protein 1	Yes	0.583776	0.367258	0.368881	0.754135	0.440859	0.477371	0.243292	0.154585	0.738361	0.16106	0.528318	0.15819	0.527071	0.495165	1.2493	0.17564	0.616499	0.06283	0.540201	-0.910511	-0.667219	PF3D7_0935900	569	S	___1	TENQS(1)GELLTQAEK	5	KPQAEKDALAKTENQSGELLTQAEKDALAKK	PFI1735c
PF3D7_0511500		RNA pseudouridylate synthase, putative	No	0.583586	-0.138891	-0.267429	0.163015	0.065689	0.252609	-0.34622	-0.930956	-0.34737	0.47356	0.334669	-0.24683	-0.514259	-0.145784	0.017231	-0.252489	-0.1868	-0.595779	-0.34317	-0.10824	-0.45446	PF3D7_0511500	139	S	___1	NCS(0.983)GT(0.017)DDKNYSNNK	3	VSTEYSDNHTLYKNCSGTDDKNYSNNKDDKI	MAL5P1.115;PFE0570w
PF3D7_0515700	GAP40	glideosome-associated protein 40, putative	No	0.58296	0.07799	-0.08816	-0.32732	-0.05236	-0.14518	-0.20165	-1.70823	-1.12527	-1.79583	-1.71784	-1.34075	-1.42891	-1.49734	-1.82466	-1.50259	-1.55495	-1.44742	-1.5926	-1.37529	-1.57694	PF3D7_0515700	372	S	___1	QGTQASKPFLSSADNEEDEESSFS(0.973)S(0.027)NDSK	24	FLSSADNEEDEESSFSSNDSKSYQGSQDYDD	MAL5P1.157;PFE0785c
PF3D7_1357400		conserved Plasmodium protein, unknown function	No	0.58293	0.10305	-0.20311	0.03696	-0.00181	-0.28137	-0.07288	1.49056	2.07349	1.54413	1.64718	1.66601	1.4629	1.50784	1.5448	1.50739	1.50558	1.82353	1.54216	1.54396	1.47108	PF3D7_1357400	506	S	___1	KESLQECCNDS(1)NS(1)IIYR	11	KKLVKKESLQECCNDSNSIIYRRKKAKKKAK	PF13_0307
PF3D7_1244600	ARFGAP1	ADP-ribosylation factor GTPase-activating protein, putative	No	0.58247	0.15401	-0.08275	-0.27389	-0.25135	-0.09541	-0.08777	-2.27884	-1.69637	-1.9234	-1.76939	-1.80992	-1.89267	-1.81501	-2.0889	-1.48022	-1.73157	-1.51346	-1.60887	-1.61573	-1.7035	PF3D7_1244600	133	S	___1	SIVHNVDPPAPLPLDEGKS(1)LINYGR	19	HNVDPPAPLPLDEGKSLINYGRNENVNENNK	2277.t00428;MAL12P1.426;PFL2140c
PF3D7_0308900	SF3B1	splicing factor 3B subunit 1, putative	No	0.58224	-0.47685	-0.14095	-0.04005	-0.69579	-0.32625	0.78513	-4.99273	-4.41049	-4.10365	-4.5805	-4.1426	-4.28355	-3.98721	-4.02726	-3.99712	-4.69291	-3.91496	-4.24121	-4.34454	-3.55941	PF3D7_0308900	382	T	___2	T(0.055)PFT(0.945)PMVDTSLSTDDLIK	4	NMNTPYIPNNIKTPFTPMVDTSLSTDDLIKI	MAL3P3.10;PFC0375c
PF3D7_0801700	SENP2	sentrin-specific protease 2, putative	No	0.582026	-0.185492	-0.00403	0.21203	-0.1527	0.0177	-0.11344	-0.921206	-0.33918	-0.747839	-0.933331	-1.11102	-1.11505	-1.16991	-0.95788	-1.06858	-1.22128	-1.19396	-1.17626	-1.04083	-1.15427	PF3D7_0801700	923	S	___1	QSDS(0.001)IS(0.999)IR	6	YMHNPQPYNKQSDSISIRNTESINEENISIK	MAL8P1.157
PF3D7_0220600		Plasmodium exported protein (hyp9), unknown function	Yes	0.58183	0.47871	0.60201	0.50769	0.37796	0.4147	0.27039	2.41896	3.00079	2.67232	3.15103	2.60329	3.2053	2.60955	3.11724	2.60902	2.98698	2.41323	2.82793	2.45679	2.72718	PF3D7_0220600	99	S	___1	MVEVDSES(1)VCPGTNEVNLK	8	GNMHPEIKMVEVDSESVCPGTNEVNLKVVTN	PF02_0193;PFB0930w
PF3D7_1149100		Plasmodium exported protein, unknown function	Yes	0.58109	0.521358	0.422961	0.763715	0.45157	0.72873	0.30026	-1.30506	-0.72397	-1.2397	-0.718342	-1.12641	-0.703449	-0.891214	-0.127499	-1.36308	-0.91151	-1.55107	-0.82234	-1.59906	-1.2988	PF3D7_1149100;PF3D7_1149100	185;186	S	___1	TETQEESLNKEVVEGCS(0.5)T(0.5)GMCPLK	17	ETQEESLNKEVVEGCSTGMCPLKNNDTKKEN	PF11_0508;PF3D7_1149100.1;PF3D7_1149100.2
PF3D7_1436300	PTEX150	translocon component PTEX150	No	0.579285	0.135618	0.213341	0.201756	0.58564	0.35339	0.021381	-0.384735	0.19455	-0.75264	-0.617022	-0.80748	-0.594139	-0.881165	-0.679409	-0.85816	-0.27252	-1.3163	-0.96291	-0.75024	-0.728859	PF3D7_1436300	950	Y	___1	NNS(0.156)NDDDDMDNGY(0.823)VT(0.021)FDGK	13	NTKNNSNDDDDMDNGYVTFDGKNKVSENDDD	PF14_0344;Pf112
PF3D7_1473200		DnaJ protein, putative	No	0.57916	0.28466	0.1593	-0.02221	-0.23493	0.18294	0.01682	-3.86703	-3.28787	-3.39815	-3.11349	-3.75652	-3.59722	-3.17999	-3.2022	-3.62594	-3.86087	-3.11325	-2.93031	-3.92938	-3.91256	PF3D7_1473200	145	S	___3	NS(1)ENFGNSEISENSESAER	2	SGKSEISGNSENARNSENFGNSEISENSESA	PF14_0700
PF3D7_1466800		conserved Plasmodium protein, unknown function	No	0.57687	0.33714	0.33932	0.58073	0.2571	0.31562	0.28171	2.38721	2.96408	2.26136	2.5985	2.39961	2.73893	2.44715	3.02788	2.43068	2.68778	2.3965	2.71212	2.27537	2.55708	PF3D7_1466800	625	S	___1	NDAY(0.001)KY(0.034)S(0.969)T(0.995)DS(1)DDIERR	10	LYNSMKNDAYKYSTDSDDIERRLTKGIENEK	PF14_0636
PF3D7_0112200	MRP1	multidrug resistance-associated protein 1	No	0.576034	0.561817	0.57315	0.431495	0.326368	0.21891	0.56163	-0.824594	-0.24856	-0.670149	-0.108332	-0.662029	-0.0888786	-0.586414	-0.154919	-0.515369	-0.189001	-0.299669	-0.080759	-0.5336	0.0280304	PF3D7_0112200	235	S	___1	FS(0.965)S(0.029)QT(0.006)EIDEISRDFLSIGK	2	HLQNPDAFYNTYRKFSSQTEIDEISRDFLSI	MAL1P3.03;PFA0590w
PF3D7_1478600	PTP3	EMP1-trafficking protein	Yes	0.57582	0.31442	0.587201	1.13075	0.33817	0.5382	0.50993	-1.69237	-1.11655	-2.36818	-2.05376	-1.33187	-0.744669	-1.75721	-0.626459	-1.68259	-1.34442	-1.34647	-0.80827	-1.81574	-1.30581	PF3D7_1478600;PF3D7_1477000	1171;922	S	___2	CGIDVES(1)DIDIETETNPLK	7	KVKDIVSKKCGIDVESDIDIETETNPLKWHQ	PF14_0758
PF3D7_1478600	PTP3	EMP1-trafficking protein	Yes	0.57582	0.31442	0.587201	1.13075	0.33817	0.5382	0.50993	-1.69237	-1.11655	-2.36818	-2.05376	-1.33187	-0.744669	-1.75721	-0.626459	-1.68259	-1.34442	-1.34647	-0.80827	-1.81574	-1.30581	PF3D7_1478600;PF3D7_1477000	1177;928	T	___2	CGIDVES(1)DIDIET(0.985)ET(0.015)NPLK	13	SKKCGIDVESDIDIETETNPLKWHQVVRNKY	PF14_0758
PF3D7_0916700	HoMu	RNA-binding protein musashi, putative	No	0.574641	0.294638	0.310411	0.273195	0.340539	0.19681	0.17336	-1.03282	-0.458179	-1.12118	-0.826542	-1.14789	-0.837479	-0.951635	-0.67844	-1.17299	-0.832451	-1.21241	-1.0156	-1.19029	-1.01693	PF3D7_0916700	272	S	___1	GYGFLTFS(0.706)S(0.293)PR	8	HDNEGKSKGYGFLTFSSPREAFKVMQQPERI	PFI0820c
PF3D7_0209100	PATPL1	phospholipase A2, putative	No	0.57379	-0.28441	-0.06661	0.96751	0.06081	-0.10482	0.24356	-3.66409	-3.0903	-3.49706	-3.78147	-3.14102	-3.20763	-3.99273	-3.02522	-3.35248	-3.29167	-3.5579	-3.66272	-3.82601	-3.58245	PF3D7_0209100	218	S	___2	YNLDQTDILLDDS(1)NS(1)ERRR	13	ICKYNLDQTDILLDDSNSERRRNSKFKIKNT	PF02_0087;PFB0410c
PF3D7_0209100	PATPL1	phospholipase A2, putative	No	0.57379	-0.28441	-0.06661	0.96751	0.06081	-0.10482	0.24356	-3.66409	-3.0903	-3.49706	-3.78147	-3.14102	-3.20763	-3.99273	-3.02522	-3.35248	-3.29167	-3.5579	-3.66272	-3.82601	-3.58245	PF3D7_0209100	220	S	___2	YNLDQTDILLDDS(1)NS(1)ERRR	15	KYNLDQTDILLDDSNSERRRNSKFKIKNTNY	PF02_0087;PFB0410c
PF3D7_0406500		NYN domain-containing protein, putative	No	0.57354	0.08887	0.30965	1.05606	0.55467	0.34619	-0.14204	-2.46043	-1.88689	-2.23119	-2.14232	-2.48926	-2.17961	-2.70123	-1.64517	-2.658	-2.10333	-2.5922	-2.24601	-2.38701	-2.52905	PF3D7_0406500	1673	S	___1	FQSASFNYYEKS(1)DDMK	12	AHDKFQSASFNYYEKSDDMKREKIKRDKIKM	MAL4P1.63;PFD0320c
PF3D7_1149000	Pf332	antigen 332, DBL-like protein	Yes	0.573186	0.289	0.47242	0.3797	0.49097	0.53373	0.39934	0.902254	1.47544	1.40062	1.68962	1.50384	1.97626	1.45487	1.83457	1.41001	1.90098	1.303	1.83673	1.12973	1.52907	PF3D7_1149000	275	S	___1	NSNNLKDLDS(0.817)NS(0.183)DKDGIVSESYK	10	EGAGNKNSNNLKDLDSNSDKDGIVSESYKAT	PF11_0506;PF11_0507
PF3D7_1101700	MC-2TM	Pfmc-2TM Maurer's cleft two transmembrane protein	Yes	0.573166	0.12144	-0.33484	0.189238	0.191759	1.15912	-0.05133	-0.906656	-0.33349	-2.19349	-2.07205	-3.48588	-3.82072	-0.504326	-0.315088	0.0855999	0.277359	-1.85849	-0.699369	-2.90631	-2.95764	PF3D7_1101700;PF3D7_1039700	60;60	T	___1	S(0.001)FGNT(0.23)LT(0.769)NILFK	7	LAQKNDNKKSFGNTLTNILFKDKKKKNLDPQ	PF11_0025
PF3D7_1464900		ATP-dependent zinc metalloprotease FTSH, putative	No	0.57273	0.25341	0.65015	0.54021	0.25359	0.67399	0.54923	-3.5179	-2.94517	-3.46374	-3.21033	-3.87089	-3.22074	-3.60159	-3.06138	-3.64287	-3.38928	-3.72757	-3.05358	-3.86765	-3.31842	PF3D7_1464900	478	S	___1	KS(1)VDMNSIEQAFDR	2	ILNIAAIKCSVEGKKSVDMNSIEQAFDRVVV	PF14_0616
PF3D7_1149100		Plasmodium exported protein, unknown function	Yes	0.572266	0.634129	0.000929	0.481906	0.32556	0.48546	0.522631	-0.00341606	0.56885	0.0855312	0.71966	0.433241	0.43417	0.445395	0.927301	0.0888805	0.41444	-0.0204391	0.465021	-0.0051899	0.517441	PF3D7_1149100;PF3D7_1149100	403;404	S	___1	NETQEES(1)LNK	7	NCESCKKEKNETQEESLNKLSTKNSTNDSIK	PF11_0508;PF3D7_1149100.1;PF3D7_1149100.2
PF3D7_1149000	Pf332	antigen 332, DBL-like protein	Yes	0.57196	0.48255	0.44419	0.56296	0.630131	0.44544	0.2259	1.90145	2.47341	1.29828	1.78083	1.63533	2.07952	1.68896	2.25192	0.669979	1.30011	1.19128	1.63672	0.79627	1.02217	PF3D7_1149000	1918	S	___1	IIPEVS(0.999)VT(0.001)ENVVEK	6	IEETKLANEKIIPEVSVTENVVEKEGLDTEE	PF11_0506;PF11_0507
PF3D7_0401800	PfD80	Plasmodium exported protein (PHISTb), unknown function	Yes	0.570086	0.356157	0.382059	0.736821	0.479749	0.53583	0.35237	-0.739775	-0.169689	-0.616419	-0.260262	0.0657806	0.44784	-1.06445	-0.327629	-1.46685	-0.987101	-0.56757	-0.0317402	-3.26505	-2.91268	PF3D7_0401800	79	T	___1	RS(0.022)PS(0.561)T(0.313)AS(0.475)T(0.732)S(0.692)T(0.163)S(0.042)LR	8	SSLASTTKRSPSTASTSTSLRSASTASTAST	MAL4P1.16;PFD0080c
PF3D7_0202000	KAHRP	knob-associated histidine-rich protein	Yes	0.56735	0.16117	0.40029	0.42884	0.2667	0.25132	-0.0171	4.67206	5.23941	5.20583	5.367	5.09689	5.49718	5.14076	5.5696	5.14048	5.40718	5.12098	5.3723	4.56525	4.54815	PF3D7_0202000	598	S	___3	GAS(0.991)T(0.961)T(0.048)AGS(0.965)T(0.03)T(0.005)GATTGANAVQSK	3	ATKEASTTEGATKGASTTAGSTTGATTGANA	PF02_0020;PFB0100c
PF3D7_1106800	pTKL	protein kinase, putative	Yes	0.567247	-0.048992	-0.06469	0.272976	0.147459	0.011669	-0.389988	-0.870346	-0.303099	0.286711	0.237719	-0.358009	-0.422699	-0.164345	0.108631	-0.33358	-0.186121	-0.497669	-0.486	-0.0735111	-0.463499	PF3D7_1106800	1182	S	___1	Y(0.005)AS(0.97)ET(0.025)KYNIK	3	TDHNIEQINECNKYASETKYNIKKSNLKNNI	PF11_0079
PF3D7_1473200		DnaJ protein, putative	No	0.566916	-0.08742	-0.129758	0.018076	0.218599	-0.08827	-0.25861	0.223705	0.790621	1.12186	1.03444	0.71409	0.584332	0.696745	0.714821	0.600491	0.81909	0.57559	0.48732	0.84387	0.58526	PF3D7_1473200	2	S	___1	S(0.876)S(0.124)KQDVDLYEILGVNRR	1	______________MSSKQDVDLYEILGVNR	PF14_0700
PF3D7_1036900		conserved Plasmodium protein, unknown function	No	0.56651	-0.07785	-0.42223	-0.30122	0.30531	0.05028	0.10905	-4.5203	-3.95379	-4.3403	-4.41815	-3.71361	-4.13584	-3.95032	-4.25154	-4.41574	-4.11043	-4.70821	-4.65793	-3.94379	-3.83474	PF3D7_1036900	886	S	___1	IFFGNINIS(0.005)GDNIENFNMS(0.877)ENS(0.118)VMEHMK	19	GNINISGDNIENFNMSENSVMEHMKHNNMLN	PF10_0361
PF3D7_1359100		riboflavin kinase / FAD synthase family protein, putative	No	0.56589	0.09593	0.31418	0.05749	-0.02558	0.1897	-0.09732	-2.54891	-1.98302	-2.09645	-2.00052	-1.74314	-1.42896	-1.56392	-1.50643	-1.72729	-1.75287	-1.55633	-1.36663	-1.71691	-1.81423	PF3D7_1359100	213	S	___1	IDCINIS(0.033)NLNNLS(0.936)KDNIIT(0.026)T(0.005)QDDQYK	13	QEKIDCINISNLNNLSKDNIITTQDDQYKHL	MAL13P1.292
PF3D7_0710200		conserved Plasmodium protein, unknown function	No	0.56538	-0.65661	0.028	-0.8834	-0.48325	0.24811	-0.34876	-4.25321	-3.68783	-4.33853	-4.99514	-4.1916	-4.1636	-3.99158	-4.87498	-4.4888	-4.97205	-4.42818	-4.18007	-4.05725	-4.40601	PF3D7_0710200	2869	S	___2	S(0.012)NNLS(0.988)ELDILSNELNSNTTSK	5	ENSSFKSSTLKSNNLSELDILSNELNSNTTS	PF07_0042
PF3D7_0710200		conserved Plasmodium protein, unknown function	No	0.56538	-0.65661	0.028	-0.8834	-0.48325	0.24811	-0.34876	-4.25321	-3.68783	-4.33853	-4.99514	-4.1916	-4.1636	-3.99158	-4.87498	-4.4888	-4.97205	-4.42818	-4.18007	-4.05725	-4.40601	PF3D7_0710200	2880	S	___2	SNNLSELDILS(0.034)NELNS(0.834)NT(0.11)T(0.019)S(0.004)K	16	SNNLSELDILSNELNSNTTSKRKYSRNKNKK	PF07_0042
PF3D7_0508900		conserved Plasmodium protein, unknown function	No	0.565296	0.552329	0.44443	0.417116	0.73912	0.531151	0.273201	-0.469776	0.09552	-0.570229	-0.0179005	-0.307089	0.137341	-0.200125	0.216991	-2.31136	-1.57224	-0.73674	-0.205589	-0.38525	-0.112049	PF3D7_0508900	1872	S	___3	S(1)KS(1)AT(1)Y(1)NNIS(1)KNEK	1	NNESKNTYNISTYIRSKSATYNNISKNEKEN	MAL5P1.90;PFE0440w
PF3D7_0508900		conserved Plasmodium protein, unknown function	No	0.565296	0.552329	0.44443	0.417116	0.73912	0.531151	0.273201	-0.469776	0.09552	-0.570229	-0.0179005	-0.307089	0.137341	-0.200125	0.216991	-2.31136	-1.57224	-0.73674	-0.205589	-0.38525	-0.112049	PF3D7_0508900	1874	S	___3	S(1)KS(1)AT(1)Y(1)NNIS(1)KNEK	3	ESKNTYNISTYIRSKSATYNNISKNEKENKK	MAL5P1.90;PFE0440w
PF3D7_0508900		conserved Plasmodium protein, unknown function	No	0.565296	0.552329	0.44443	0.417116	0.73912	0.531151	0.273201	-0.469776	0.09552	-0.570229	-0.0179005	-0.307089	0.137341	-0.200125	0.216991	-2.31136	-1.57224	-0.73674	-0.205589	-0.38525	-0.112049	PF3D7_0508900	1881	S	___3	S(1)KS(1)AT(1)Y(1)NNIS(1)KNEK	10	ISTYIRSKSATYNNISKNEKENKKNEIYIVH	MAL5P1.90;PFE0440w
PF3D7_0508900		conserved Plasmodium protein, unknown function	No	0.565296	0.552329	0.44443	0.417116	0.73912	0.531151	0.273201	-0.469776	0.09552	-0.570229	-0.0179005	-0.307089	0.137341	-0.200125	0.216991	-2.31136	-1.57224	-0.73674	-0.205589	-0.38525	-0.112049	PF3D7_0508900	1876	T	___3	S(1)KS(1)AT(1)Y(1)NNIS(1)KNEK	5	KNTYNISTYIRSKSATYNNISKNEKENKKNE	MAL5P1.90;PFE0440w
PF3D7_0508900		conserved Plasmodium protein, unknown function	No	0.565296	0.552329	0.44443	0.417116	0.73912	0.531151	0.273201	-0.469776	0.09552	-0.570229	-0.0179005	-0.307089	0.137341	-0.200125	0.216991	-2.31136	-1.57224	-0.73674	-0.205589	-0.38525	-0.112049	PF3D7_0508900	1877	Y	___3	S(1)KS(1)AT(1)Y(1)NNIS(1)KNEK	6	NTYNISTYIRSKSATYNNISKNEKENKKNEI	MAL5P1.90;PFE0440w
PF3D7_0404600		conserved Plasmodium membrane protein, unknown function	No	0.564455	0.326519	0.354189	0.680665	0.413349	0.3934	0.47434	-0.588015	-0.0235596	-0.79775	-0.471231	-0.833769	-0.47958	-0.940454	-0.259789	-0.861629	-0.44828	-0.9209	-0.5275	-1.02248	-0.54814	PF3D7_0404600	2096	Y	___1	RGEQT(0.009)NS(0.362)NDEY(0.629)KK	11	YVDMKRGEQTNSNDEYKKKNSYYIKNGDMEN	MAL4P1.44;PFD0220c;PFD0220w;PFD0225w
PF3D7_0702500		Plasmodium exported protein, unknown function	Yes	0.564036	0.791979	0.867849	0.746586	0.729411	0.871941	-0.53974	0.467514	1.03155	0.340801	1.13278	0.337681	1.20553	0.593624	1.34021	-0.0731506	0.65626	0.09272	0.964661	-1.4673	-2.00704	PF3D7_0702500	169	S	___2	NS(0.149)S(0.853)QHS(0.972)VGS(0.032)HS(0.994)VS(0.464)S(0.537)QEHK	11	NSDGRNSSQHSVGSHSVSSQEHKKEHSTHDL	PF07_0008
PF3D7_1467600		conserved Plasmodium protein, unknown function	No	0.56355	0.19168	0.34037	0.65899	0.28101	0.34618	0.23175	2.37018	2.93373	2.23162	2.4233	1.84104	2.18141	2.05791	2.7169	1.88684	2.16785	1.72259	2.06877	1.8227	2.05445	PF3D7_1467600	2083	S	___1	T(0.002)LS(0.997)DS(0.001)K	3	SHKTIDFKKANVRTLSDSKYGSFKNKQHSSI	PF14_0644
PF3D7_1107300	PAIP1	polyadenylate-binding protein-interacting protein 1, putative	No	0.562735	0.284648	0.19305	0.684277	0.01709	0.377569	0.203841	-0.998955	-0.43622	-0.67275	-0.388102	-0.591589	-0.398539	-0.784216	-0.0999393	-0.70376	-0.68667	-0.626499	-0.24893	-0.89362	-0.689779	PF3D7_1107300	2027	S	___3	KETDKADDIS(1)VCDTISVIEK	10	SVQNKKKETDKADDISVCDTISVIEKKEDFE	PF11_0086
PF3D7_1107300	PAIP1	polyadenylate-binding protein-interacting protein 1, putative	No	0.562735	0.284648	0.19305	0.684277	0.01709	0.377569	0.203841	-0.998955	-0.43622	-0.67275	-0.388102	-0.591589	-0.398539	-0.784216	-0.0999393	-0.70376	-0.68667	-0.626499	-0.24893	-0.89362	-0.689779	PF3D7_1107300	2033	S	___3	KET(0.001)DKADDIS(0.999)VCDT(1)IS(1)VIEK	16	KETDKADDISVCDTISVIEKKEDFEELKDEK	PF11_0086
PF3D7_1107300	PAIP1	polyadenylate-binding protein-interacting protein 1, putative	No	0.562735	0.284648	0.19305	0.684277	0.01709	0.377569	0.203841	-0.998955	-0.43622	-0.67275	-0.388102	-0.591589	-0.398539	-0.784216	-0.0999393	-0.70376	-0.68667	-0.626499	-0.24893	-0.89362	-0.689779	PF3D7_1107300	2031	T	___3	KET(0.001)DKADDIS(0.999)VCDT(1)IS(1)VIEK	14	KKKETDKADDISVCDTISVIEKKEDFEELKD	PF11_0086
PF3D7_1110400		RNA-binding protein, putative	No	0.56238	-0.154201	0.11983	0.617621	0.58242	0.18822	0.10414	-1.60131	-1.03893	-0.43644	-0.590641	-1.22599	-1.10616	-1.61615	-0.998529	-2.16144	-1.57902	-1.73471	-1.54649	-1.79952	-1.69538	PF3D7_1110400	674	S	___1	DFS(1)NLKNNTPDDNKK	3	NFNKNMDNNNITRDFSNLKNNTPDDNKKNIN	PF11_0111
PF3D7_0601200	MC-2TM	Pfmc-2TM Maurer's cleft two transmembrane protein	Yes	0.562301	0.60956	-0.15758	-0.17165	0.188469	0.51661	0.015561	-1.03362	-0.471319	-2.93477	-2.32521	-3.0169	-3.17448	-1.40668	-1.57833	-0.58263	-0.394161	-3.43184	-2.91523	-0.430861	-0.4153	PF3D7_0601200	58	T	___1	KPFGNT(0.998)LT(0.002)NILLK	6	RMLAQKNTNKKPFGNTLTNILLKDKGGKGSK	PFF0060w
PF3D7_0401800	PfD80	Plasmodium exported protein (PHISTb), unknown function	Yes	0.562145	0.618698	0.17948	0.691875	0.50954	0.45789	0.11139	0.374645	0.93679	-0.286089	0.332609	-0.52426	-0.34478	-0.561275	0.1306	-0.23278	0.27676	-0.402899	0.0549908	-0.25104	-0.13965	PF3D7_0401800	133	S	___3	S(1)AS(1)AAS(0.956)T(0.036)T(0.007)R	1	TASTASTASAASTTRSASAASTTRSASAAST	MAL4P1.16;PFD0080c
PF3D7_1353100		Plasmodium exported protein, unknown function	Yes	0.56109	0.04243	0.32065	0.21606	0.37127	0.36873	-0.00257	2.40508	2.96617	2.33337	2.3758	2.21297	2.53362	2.52037	2.73643	2.36559	2.73686	1.4749	1.84363	1.75973	1.75716	PF3D7_1353100	112	S	___1	T(0.034)S(0.966)YTEVK	2	TEDVNHKAHHTGERTSYTEVKHRRSSSNSHV	PF13_0275
PF3D7_1001500	ETRAMP10	early transcribed membrane protein 10.1	Yes	0.5599	0.18023	0.4046	0.57523	0.27125	0.390429	0.13362	1.43002	1.98992	1.00399	1.18422	1.11248	1.51708	1.23741	1.81264	1.22849	1.49974	0.985281	1.37571	1.30029	1.43391	PF3D7_1001500	95	S	___1	NKS(1)QEGSTPLLTAK	3	DEGNDKKGSNDSKNKSQEGSTPLLTAKA___	PF10_0019
PF3D7_1468100		conserved Plasmodium protein, unknown function	No	0.558631	-0.141912	-0.3223	-0.00661468	0.396369	-0.219019	-0.63447	-1.47318	-0.914549	0.479721	0.337809	-0.311289	-0.633589	-0.000324249	-0.00693893	-0.41221	-0.0158405	-0.14686	-0.365879	0.24721	-0.38726	PF3D7_1468100	2557	T	___1	NNSDDVNEDNKS(1)LEDAEEEDT(1)I	21	VNEDNKSLEDAEEEDTI______________	PF14_0649
PF3D7_1309100		60S ribosomal protein L24, putative	No	0.55698	-0.55791	0.4376	0.09855	-0.01361	-0.74252	-0.18471	-4.0153	-3.45832	-3.00813	-3.56604	-3.16459	-2.72699	-2.88706	-2.78851	-2.95132	-2.96493	-2.30429	-3.04681	-3.01368	-3.19839	PF3D7_1309100	45	S	___1	FAS(1)LALQK	3	ARDGKVYFYLSSKFASLALQKKKAAKLRWTQ	PF13_0049
PF3D7_0702500		Plasmodium exported protein, unknown function	Yes	0.556505	0.65597	0.37011	1.43398	0.41918	0.46427	-0.47713	0.117495	0.674	1.69016	2.34613	1.59572	1.96583	1.01632	2.4503	0.473709	0.892889	1.98183	2.4461	-1.86001	-2.33714	PF3D7_0702500	224	S	___2	SFS(0.999)GS(0.001)K	3	HYSLGGQPSSSGRSFSGSKYNTSNLASSSTT	PF07_0008
PF3D7_1001500	ETRAMP10	early transcribed membrane protein 10.1	Yes	0.556137	-0.028302	0.511301	0.671335	0.33371	0.452381	0.265622	0.243654	0.799791	-0.630159	-0.658461	-0.6833	-0.171999	-0.520664	0.150671	-0.35137	-0.0176601	-1.03989	-0.587509	-0.190081	0.0755405	PF3D7_1001500	95	S	___2	NKS(1)QEGSTPLLTAK	3	DEGNDKKGSNDSKNKSQEGSTPLLTAKA___	PF10_0019
PF3D7_1001500	ETRAMP10	early transcribed membrane protein 10.1	Yes	0.556137	-0.028302	0.511301	0.671335	0.33371	0.452381	0.265622	0.243654	0.799791	-0.630159	-0.658461	-0.6833	-0.171999	-0.520664	0.150671	-0.35137	-0.0176601	-1.03989	-0.587509	-0.190081	0.0755405	PF3D7_1001500	99	S	___2	NKS(0.996)QEGS(0.914)T(0.089)PLLTAK	7	DKKGSNDSKNKSQEGSTPLLTAKA_______	PF10_0019
PF3D7_0801800		mannose-6-phosphate isomerase, putative	No	0.55611	-0.0265	-0.66371	0.43347	0.36643	-0.40789	-0.19069	-2.69024	-2.13413	-1.06117	-1.08767	-1.75972	-2.42343	-1.77419	-1.34072	-1.95619	-1.58976	-1.72225	-2.13014	-1.68415	-1.87484	PF3D7_0801800	2	S	___1	S(0.997)KLCINECIPY(0.003)VQK	1	______________MSKLCINECIPYVQKYE	MAL8P1.156
PF3D7_1149000	Pf332	antigen 332, DBL-like protein	Yes	0.556017	0.552158	0.443169	0.513325	0.29007	0.598079	0.21883	0.0374241	0.593441	-0.36343	0.188728	-0.420729	0.02244	-0.131655	0.38167	-2.03368	-1.74361	-0.91106	-0.312981	-0.41839	-0.19956	PF3D7_1149000	2198	S	___1	EVSDAEEVLGQEGS(1)MNEEILEK	14	QKEVSDAEEVLGQEGSMNEEILEKESIVEEI	PF11_0506;PF11_0507
PF3D7_0936800		Plasmodium exported protein (PHISTc), unknown function	Yes	0.55495	0.3141	0.42024	0.80247	0.38642	0.55296	0.3324	1.31219	1.86714	1.28683	1.60093	1.66063	2.08087	1.47454	2.27701	1.44432	1.83074	1.43427	1.98723	1.42151	1.75391	PF3D7_0936800	85	S	___1	S(1)LSDEINK	1	LRSHSTSDPKKNEEKSLSDEINKCDMKKYTA	PFI1780w
PF3D7_0113200		Plasmodium exported protein, unknown function	Yes	0.55425	0.038528	0.15423	0.48491	0.25433	0.29909	0.19069	2.0813	2.63555	0.7239	0.762428	1.86877	2.023	2.11873	2.60364	2.01583	2.27016	2.34796	2.64705	2.06301	2.2537	PF3D7_0113200	131	S	___1	NS(0.999)GLS(0.001)HMFSSEINK	2	SNVKKEEQKNKQTKNSGLSHMFSSEINKTQT	MAL1P3.08;PFA0630c
PF3D7_0202000	KAHRP	knob-associated histidine-rich protein	Yes	0.55354	0.2407	0.58655	0.58119	0.43234	0.6341	-0.1884	-2.26642	-1.71288	-1.73802	-1.49732	-1.60709	-1.02054	-2.00453	-1.42334	-2.1597	-1.72736	-1.83355	-1.19945	-2.37166	-2.56006	PF3D7_0202000	608	T	___3	GAS(0.148)T(0.846)T(0.835)AGS(0.287)T(0.697)T(0.225)GAT(0.783)T(0.179)GANAVQSK	13	ATKGASTTAGSTTGATTGANAVQSKDETADK	PF02_0020;PFB0100c
PF3D7_0202000	KAHRP	knob-associated histidine-rich protein	Yes	0.55354	0.2407	0.58655	0.58119	0.43234	0.6341	-0.1884	-2.26642	-1.71288	-1.73802	-1.49732	-1.60709	-1.02054	-2.00453	-1.42334	-2.1597	-1.72736	-1.83355	-1.19945	-2.37166	-2.56006	PF3D7_0202000	609	T	___3	GAS(0.029)T(0.364)T(0.512)AGS(0.094)T(0.147)T(0.113)GAT(0.073)T(0.669)GANAVQSK	14	TKGASTTAGSTTGATTGANAVQSKDETADKN	PF02_0020;PFB0100c
PF3D7_1033200	ETRAMP10.2	early transcribed membrane protein 10.2	Yes	0.553035	0.214527	0.587919	0.0612241	0.324719	0.39612	0.441782	0.197596	0.750631	-0.233589	-0.019062	-0.455019	0.1329	0.0584259	0.11965	-0.13567	0.189049	-0.377939	0.0181808	0.0110188	0.452801	PF3D7_1033200	86	S	___1	NVDS(1)EVQEIIDEKDEK	4	TGIGLNMYMKKKNVDSEVQEIIDEKDEKVKE	PF10_0323
PF3D7_0904900	CuTP	copper-transporting ATPase	Yes	0.55259	-0.12116	-0.26673	-0.61458	-0.64527	-0.18482	0.31361	-4.3827	-3.83011	-4.03608	-4.15724	-4.12275	-4.38948	-4.14065	-4.75523	-3.65352	-4.29879	-3.93818	-4.123	-4.75659	-4.44298	PF3D7_0904900	1697	S	___2	NNLS(0.661)FS(0.224)T(0.15)S(0.363)S(0.32)FFLS(0.249)NQFLY(0.033)DDDEINK	4	VGKENIKVDTLKNNLSFSTSSFFLSNQFLYD	PFI0240c
PF3D7_0529800		conserved Plasmodium protein, unknown function	No	0.55146	-0.07537	-0.21122	-0.21658	-0.00011	-0.30747	-0.01037	1.65106	2.20252	1.58371	1.50834	1.58192	1.3707	1.54557	1.32899	1.17483	1.17472	1.65741	1.34994	1.29765	1.28728	PF3D7_0529800	500	S	___2	ELKDNES(0.994)FS(0.05)ES(0.957)MLNENYHNQQNDK	7	LINGIKEQKELKDNESFSESMLNENYHNQQN	MAL5P1.294;PFE1485w
PF3D7_0529800		conserved Plasmodium protein, unknown function	No	0.55146	-0.07537	-0.21122	-0.21658	-0.00011	-0.30747	-0.01037	1.65106	2.20252	1.58371	1.50834	1.58192	1.3707	1.54557	1.32899	1.17483	1.17472	1.65741	1.34994	1.29765	1.28728	PF3D7_0529800	504	S	___2	ELKDNES(0.994)FS(0.05)ES(0.957)MLNENYHNQQNDK	11	IKEQKELKDNESFSESMLNENYHNQQNDKNE	MAL5P1.294;PFE1485w
PF3D7_0202000	KAHRP	knob-associated histidine-rich protein	Yes	0.548077	0.20695	0.17281	0.222476	0.16139	0.30254	0.21458	-0.196936	0.351141	-0.34524	-0.13829	-0.547829	-0.375019	-0.0514755	0.171001	-0.12536	0.0360298	-0.6481	-0.34556	-0.20763	0.00695038	PF3D7_0202000	469	S	___2	T(0.141)NNS(0.153)KS(0.727)DGS(0.979)KAHEK	6	TNEENKNKEKTNNSKSDGSKAHEKKENETKN	PF02_0020;PFB0100c
PF3D7_0202000	KAHRP	knob-associated histidine-rich protein	Yes	0.548077	0.20695	0.17281	0.222476	0.16139	0.30254	0.21458	-0.196936	0.351141	-0.34524	-0.13829	-0.547829	-0.375019	-0.0514755	0.171001	-0.12536	0.0360298	-0.6481	-0.34556	-0.20763	0.00695038	PF3D7_0202000	472	S	___2	S(0.003)DGS(0.997)KAHEK	4	ENKNKEKTNNSKSDGSKAHEKKENETKNTAG	PF02_0020;PFB0100c
PF3D7_0501400	FIRA	interspersed repeat antigen	Yes	0.54674	0.19599	0.40376	0.83051	0.52678	0.4978	0.28435	1.54219	2.08893	3.84977	4.04576	1.37592	1.77968	1.73639	2.5669	1.54918	2.07596	1.27232	1.77012	1.71696	2.00131	PF3D7_0501400	1295	S	___1	KGS(0.995)ES(0.005)DNNALNK	3	QVSITTQEHIDKKKGSESDNNALNKLSENKT	MAL5P1.15;PFE0070w
PF3D7_0524000	KASbeta	karyopherin beta	No	0.543817	0.14959	0.35758	0.593336	0.385389	0.46334	0.178731	-0.411186	0.132631	-0.56065	-0.41106	-0.63718	-0.2796	-0.629055	-0.0357189	-0.69137	-0.305981	-0.82571	-0.36237	-0.639771	-0.46104	PF3D7_0524000	360	S	___1	DDS(1)QELYDIGEESLDR	3	CFNEWMNSIKEGKDDSQELYDIGEESLDRVG	MAL5P1.239;PFE1195w
PF3D7_1149000	Pf332	antigen 332, DBL-like protein	Yes	0.54201	0.75753	0.18484	0.81769	NaN	0.685	-0.5812	-5.52081	-4.9788	-4.45533	-3.6978	-4.49378	-4.30894	-3.79764	-2.97995	NaN	NaN	-4.51732	-3.83232	-4.281	-4.8622	PF3D7_1149000	4868	S	___2	VS(0.526)PS(0.474)EEVIEEQAS(0.309)T(0.309)T(0.382)EEFVEER	2	VEEERDTDEVLKEKVSPSEEVIEEQASTTEE	PF11_0506;PF11_0507
PF3D7_0421700		conserved Plasmodium protein, unknown function	No	0.54035	-0.27853	0.11311	-0.05691	-0.14653	-0.06919	-0.16959	-2.64686	-2.10651	-2.16992	-2.44845	-2.1718	-2.05869	-2.08745	-2.14436	-1.98836	-2.13489	-1.72943	-1.79862	-1.67318	-1.84277	PF3D7_0421700	1830	S	___1	IEY(0.002)IDNS(0.532)INY(0.466)DLNDIMK	7	SKEGTSLIKIEYIDNSINYDLNDIMKKINNV	MAL4P1.201;PFD1030c
PF3D7_1334500	MSRP6	MSP7-like protein	Yes	0.53985	0.55421	0.50245	0.55774	0.47582	0.74343	0.35645	2.81025	3.3501	2.89375	3.44796	3.21213	3.71458	3.03309	3.59083	2.6618	3.13762	2.31386	3.05729	1.8292	2.18565	PF3D7_1334500;PF3D7_0214600	192;264	S	___1	LSENPEKYS(1)NYNK	9	HNYNDDKLSENPEKYSNYNKNIHEDKKKDNL	PF13_0192
PF3D7_0826200		alpha/beta hydrolase, putative	No	0.53972	0.1055	0.42407	0.03079	0.14916	0.26763	-0.02653	-1.6575	-1.11778	-1.4433	-1.3378	-1.85202	-1.42795	-1.36094	-1.33015	-1.75069	-1.60153	-2.00759	-1.73996	-1.58944	-1.61597	PF3D7_0826200	272	S	___1	S(0.015)LDEQRY(0.016)S(0.969)DAENFIIYK	8	KGNINVDKSLDEQRYSDAENFIIYKVPKYLK	PF08_0022
PF3D7_0310600	EIF3K	eukaryotic translation initiation factor 3 subunit K, putative, unspecified product	No	0.53905	0.27918	-0.02265	0.10293	-0.1005	0.00611	-0.30169	-3.39979	-2.86074	-2.44784	-2.16866	-2.29047	-2.31312	-2.09929	-1.99636	-2.28795	-2.38845	-1.99448	-1.98837	-1.88048	-2.18217	PF3D7_0310600;PF3D7_0310600	221;222	T	___1	KNINT(0.098)Y(0.047)FT(0.8)EDNIGS(0.05)Y(0.006)ITK	8	NIETVQNKKNINTYFTEDNIGSYITKLNH__	PF3D7_0310600.1;PF3D7_0310600.2;PFC0441c
PF3D7_0621100		conserved Plasmodium protein, unknown function	No	0.5378	0.23266	-0.04994	0.15658	0.18148	-0.00582	0.0374	-2.38549	-1.84769	-1.70524	-1.47258	-1.95712	-2.00706	-2.06355	-1.90697	-2.08775	-1.90627	-1.68466	-1.69048	-2.07004	-2.03264	PF3D7_0621100	169	S	___1	NHS(0.005)YDDS(0.995)EFEKNR	7	SSDQTFTSKNHSYDDSEFEKNRTNIYYSSTD	2270.t00101;MAL6P1.216;PFF1020c
PF3D7_0420000		zinc finger protein, putative	No	0.537645	-0.08619	-0.18122	0.0054	0.24233	-0.08654	-0.43014	0.998985	1.53663	2.22366	2.13747	1.57534	1.39412	1.82015	1.82555	1.63701	1.87934	1.57988	1.49334	1.96524	1.5351	PF3D7_0420000	3303	S	___1	NYYS(0.007)Y(0.001)RNS(0.993)QDKVDIQNK	8	TNKKLINKNYYSYRNSQDKVDIQNKNEYINN	MAL4P1.189;PFD0970c
PF3D7_1149000	Pf332	antigen 332, DBL-like protein	Yes	0.536246	0.595359	0.60094	0.703244	0.3389	0.65337	0.656142	0.424894	0.96114	0.462431	1.05779	0.71286	1.3138	0.688986	1.39223	-0.7785	-0.4396	0.31151	0.96488	0.0795994	0.735741	PF3D7_1149000	1594	S	___1	QQGLATYEFVEEEKS(0.997)LT(0.003)DK	15	KQQGLATYEFVEEEKSLTDKLLEEESVTKEV	PF11_0506;PF11_0507
PF3D7_0110400	RPB9	DNA-directed RNA polymerase II subunit RPB9, putative	No	0.53622	0.534	-0.1176	1.58944	0.77976	0.45564	-0.02029	-4.29454	-3.75832	-4.69163	-4.15763	-4.26025	-4.37785	-5.56975	-3.98031	-5.08287	-4.30311	-4.83746	-4.38182	-4.44282	-4.46311	PF3D7_0110400	238	Y	___1	LQNEVQS(0.477)EGENDY(0.523)DINVEEYFCEE	13	NDKLQNEVQSEGENDYDINVEEYFCEE____	MAL1P2.30;PFA0505c
PF3D7_0906600		zinc finger protein, putative	No	0.5356	0.11104	0.31147	0.21341	-0.09163	0.05217	0.07525	-2.11112	-1.57552	-1.55259	-1.44155	-1.41273	-1.10126	-1.52691	-1.3135	-1.43348	-1.52511	-1.09748	-1.04531	-1.50941	-1.43416	PF3D7_0906600	283	T	___1	RNET(1)YCIFPK	4	SNHINNNVDSNKRNETYCIFPKKKEIYFNKV	PFI0325c
PF3D7_1228300	NEK1	NIMA related kinase 1	No	0.535175	0.044189	0.06218	0.128996	-0.00032	-0.054461	-0.032711	-0.248575	0.2866	-0.37495	-0.330761	-0.379	-0.31682	-0.568886	-0.43989	-0.548901	-0.549221	-0.4699	-0.524361	-0.7328	-0.765511	PF3D7_1228300	1000	S	___1	S(0.61)MS(0.39)ACINDEENK	1	GKAMDKSSEYNRRNRSMSACINDEENKNSYN	2277.t00274;MAL12P1.274;PFL1370w
PF3D7_0702500		Plasmodium exported protein, unknown function	Yes	0.535031	0.609329	0.330379	1.35357	0.25232	0.63594	-1.03609	-1.04045	-0.505419	0.640841	1.25017	0.537701	0.86808	-0.017395	1.33618	-0.5103	-0.25798	0.79851	1.43445	-3.1354	-4.17149	PF3D7_0702500	236	S	___2	S(0.167)FS(0.814)GS(0.017)KYNT(0.001)S(0.001)NLAS(0.134)S(0.513)S(0.336)T(0.014)T(0.003)ESSVSGLNTNEAHV	15	RSFSGSKYNTSNLASSSTTESSVSGLNTNEA	PF07_0008
PF3D7_0113000	GARP	glutamic acid-rich protein	Yes	0.533566	0.471819	-0.110201	0.486574	0.243939	-0.002949	0.107691	-0.894875	-0.361309	-0.51627	-0.0444508	-0.282169	-0.39237	-0.421974	0.0646	-0.74655	-0.502611	-0.15237	-0.155319	-0.50659	-0.398899	PF3D7_0113000	185	T	___1	NAT(1)EHGEENLYEEMVSEINNNAQGGLLLSSPYQYR	3	VMSLYKTGQHKPKNATEHGEENLYEEMVSEI	MAL1P3.06;PFA0620c
PF3D7_0622900	AP2Tel	AP2 domain transcription factor AP2-SP3, putative	No	0.53193	-0.07206	-0.18807	0.18715	-0.15796	-0.14124	-0.30398	-2.0699	-1.53797	-1.77658	-1.84864	-2.00892	-2.19699	-2.2115	-2.02435	-2.19742	-2.35538	-1.91224	-2.05348	-1.91419	-2.21817	PF3D7_0622900	779	S	___2	NSNILFCFGES(0.995)S(0.995)EEEVLS(0.009)ER	11	YEEFKNSNILFCFGESSEEEVLSERCTSKEN	2270.t00117;MAL6P1.200;PFF1100c
PF3D7_0622900	AP2Tel	AP2 domain transcription factor AP2-SP3, putative	No	0.53193	-0.07206	-0.18807	0.18715	-0.15796	-0.14124	-0.30398	-2.0699	-1.53797	-1.77658	-1.84864	-2.00892	-2.19699	-2.2115	-2.02435	-2.19742	-2.35538	-1.91224	-2.05348	-1.91419	-2.21817	PF3D7_0622900	780	S	___2	NSNILFCFGES(0.995)S(0.995)EEEVLS(0.009)ER	12	EEFKNSNILFCFGESSEEEVLSERCTSKENV	2270.t00117;MAL6P1.200;PFF1100c
PF3D7_0817300		conserved Plasmodium protein, unknown function	No	0.53125	0.16749	0.29356	0.5884	0.27813	0.07741	0.06027	-2.24509	-1.71384	-2.27805	-2.11056	-2.16705	-1.87349	-2.43575	-1.84735	-2.39221	-2.11408	-2.3235	-2.24609	-2.18135	-2.12108	PF3D7_0817300	18	S	___2	NNS(0.014)S(0.024)NS(0.981)S(0.981)NENNNNDENVSLHAER	7	VHLEENKVKNNSSNSSNENNNNDENVSLHAE	PF08_0060
PF3D7_0500800	MESA	mature parasite-infected erythrocyte surface antigen	Yes	0.53111	0.52489	0.51067	0.75516	0.26984	0.4595	0.2338	1.47888	2.00999	1.37153	1.89642	1.09677	1.60744	1.92722	2.68238	1.55542	1.82526	1.78039	2.23989	1.61165	1.84545	PF3D7_0500800	319	S	___1	IT(0.086)S(0.914)EFRETENVK	3	KETRIYEETKYNKITSEFRETENVKITEESK	MAL5P1.9;PFE0040c
PF3D7_1438400	MCA2	metacaspase-like protein	No	0.530565	0.25698	-0.30335	-0.07901	-0.232021	-0.583119	0.116652	0.758265	1.28883	1.45524	1.71222	2.13863	1.83528	1.6745	1.59549	1.14249	0.910469	1.53472	0.951601	0.762659	0.879311	PF3D7_1438400	461	S	___1	IIDNNTSNAKS(0.999)EGNSTLHK	11	IFNNKIIDNNTSNAKSEGNSTLHKIYNFIFP	PF14_0362;PF14_0363
PF3D7_1475400	CRMP4	cysteine repeat modular protein 4	No	0.52995	-0.0667	-0.30011	-0.01683	0.30074	-0.01649	-0.41362	2.95453	3.48448	4.12336	4.05666	3.5461	3.24599	3.69773	3.6809	3.65565	3.95639	3.08329	3.0668	3.8622	3.44858	PF3D7_1475400	3464	S	___1	ILGKPIY(0.001)CS(0.997)LCDPIY(0.001)FHEDIYK	9	YCASIAKILGKPIYCSLCDPIYFHEDIYKNI	PF14_0722
PF3D7_1440000		conserved Plasmodium protein, unknown function	No	0.52874	0.02863	0.0112	0.03399	-0.00643	0.38724	-0.21401	-2.00771	-1.47897	-1.28176	-1.25313	-1.66171	-1.65051	-1.46926	-1.43527	-1.55796	-1.56439	-1.93033	-1.54309	-1.48619	-1.7002	PF3D7_1440000	1567	S	___1	ISQLTQS(0.006)NQNES(0.994)NKNS(0.891)Y(0.109)IEK	16	ISQLTQSNQNESNKNSYIEKNKTDNKCTNDN	PF14_0379
PF3D7_1227700	KIC2	conserved Plasmodium protein, unknown function	No	0.526287	0.32285	0.204609	0.436261	0.258409	0.231611	0.028471	-0.993786	-0.467499	-1.13674	-0.81389	-0.954279	-0.74967	-1.17369	-0.737429	-1.07509	-0.816681	-1.21199	-0.980379	-0.991621	-0.96315	PF3D7_1227700	212	T	___1	LEEIIEENES(0.048)HT(0.957)ERT(0.995)EGDNFMMSK	12	KIFKLEEIIEENESHTERTEGDNFMMSKMKS	2277.t00268;MAL12P1.268;PFL1340c
PF3D7_0527000	MCM3	DNA replication licensing factor MCM3, putative	No	0.52614	-0.09186	-0.03424	-0.64048	0.09249	0.46306	0.24019	-2.6542	-2.12806	-2.55606	-2.64792	-2.76212	-2.79636	-2.09725	-2.73773	-2.50646	-2.41397	-3.08541	-2.62235	-2.89216	-2.65197	PF3D7_0527000	636	S	___1	AQHIS(1)IYNER	5	IQADSYDINPKAQHISIYNERDINQNNDSNN	MAL5P1.269;PFE1345c
PF3D7_1149000	Pf332	antigen 332, DBL-like protein	Yes	0.52495	0.32586	0.3707	0.25358	0.57131	0.05748	0.29523	-2.00873	-1.48378	-2.3661	-2.04024	-2.15085	-1.78015	-2.21278	-1.9592	-3.155	-2.58369	-2.28919	-2.23171	-2.25975	-1.96452	PF3D7_1149000	1803	S	___1	GQGPT(0.012)DNVS(0.881)VEDVNS(0.107)EDIINEHTPLEETK	9	VDDESFKGQGPTDNVSVEDVNSEDIINEHTP	PF11_0506;PF11_0507
PF3D7_0202000	KAHRP	knob-associated histidine-rich protein	Yes	0.52403	0.17341	0.49019	0.32016	0.34768	0.33164	0.05263	5.03724	5.56127	5.386	5.55941	5.3233	5.81349	5.38564	5.7058	5.31827	5.66595	5.22671	5.55835	4.64647	4.6991	PF3D7_0202000	603	S	___3	GAS(0.08)T(0.92)T(0.001)AGS(0.992)T(0.008)TGATTGANAVQSK	8	STTEGATKGASTTAGSTTGATTGANAVQSKD	PF02_0020;PFB0100c
PF3D7_0401800	PfD80	Plasmodium exported protein (PHISTb), unknown function	Yes	0.523456	0.326609	0.245839	1.02009	0.281799	0.504699	-0.247849	0.661724	1.18518	0.648491	0.9751	0.811861	1.0577	0.593765	1.61386	0.51075	0.792549	0.297871	0.80257	0.668459	0.42061	PF3D7_0401800	283	T	___3	LPS(0.007)T(0.035)GS(0.962)T(0.996)IRFPSTGSSR	7	GSTSGSTTRLPSTGSTIRFPSTGSSRLEDYE	MAL4P1.16;PFD0080c
PF3D7_1149000	Pf332	antigen 332, DBL-like protein	Yes	0.521906	0.563148	0.48888	0.508205	0.63642	0.63942	0.43893	-0.585636	-0.0637302	-0.65694	-0.093792	-0.692989	-0.204109	-0.554014	-0.0458088	-1.03662	-0.4002	-0.83824	-0.19882	-0.68762	-0.24869	PF3D7_1149000	2335	S	___1	S(0.861)AT(0.139)EDLVEEEASVTEK	1	GEERSVTEKPVEVERSATEDLVEEEASVTEK	PF11_0506;PF11_0507
PF3D7_0220300		Plasmodium exported protein, unknown function	Yes	0.52151	0.03172	-0.13337	0.4958	-0.12978	-0.26907	-0.19429	-2.26406	-1.74255	-1.64555	-1.61383	-1.55064	-1.68401	-1.73013	-1.23433	-1.78511	-1.91489	-1.14853	-1.4176	-1.88762	-2.08191	PF3D7_0220300	89	S	___1	FIHDRYS(0.89)T(0.11)APYELIK	7	KASTTKTRRFIHDRYSTAPYELIKRKPKKKK	PF02_0190;PFB0923c
PF3D7_1467600		conserved Plasmodium protein, unknown function	No	0.52115	0.06353	0.43993	0.627871	0.40358	0.390201	0.31972	-1.61572	-1.09457	-1.36853	-1.305	-1.5771	-1.13717	-1.41928	-0.791409	-1.69905	-1.29547	-1.38561	-0.995409	-1.93109	-1.61137	PF3D7_1467600	1507	S	___1	QLESCESNSCVANS(1)VQDIR	14	LKQLESCESNSCVANSVQDIRNASSENEKDI	PF14_0644
PF3D7_1114100	ROM1	rhomboid protease ROM1	No	0.5211	0.33437	-0.01796	0.16186	0.01131	-0.14201	-0.32148	-2.81938	-2.29828	-2.45348	-2.11911	-1.87227	-1.89023	-2.07051	-1.90865	-1.75401	-1.7427	-1.51837	-1.66038	-1.52239	-1.84387	PF3D7_1114100	29	S	___2	TPDY(0.003)Y(0.014)QS(0.977)QS(0.251)S(0.755)FVQR	7	YAENTPFNRTPDYYQSQSSFVQRSKPIDLLN	PF11_0149;PF11_0150;PF3D7_1114100.1;PF3D7_1114100.2
PF3D7_1007900	EIF3D	eukaryotic translation initiation factor 3 subunit D, putative	No	0.5205	-0.11042	0.17721	0.50778	NaN	1.49158	0.99024	-5.08082	-4.56032	-4.83853	-4.94895	-5.18988	-5.01267	-5.56336	-5.05558	NaN	-5.16975	-5.97682	-4.48524	-6.01081	-5.02057	PF3D7_1007900	2	S	___1	S(0.5)S(0.5)FNLVGVINNR	1	______________MSSFNLVGVINNRTWGP	PF10_0077
PF3D7_1007900	EIF3D	eukaryotic translation initiation factor 3 subunit D, putative	No	0.5205	-0.11042	0.17721	0.50778	NaN	1.49158	0.99024	-5.08082	-4.56032	-4.83853	-4.94895	-5.18988	-5.01267	-5.56336	-5.05558	NaN	-5.16975	-5.97682	-4.48524	-6.01081	-5.02057	PF3D7_1007900	3	S	___1	S(0.5)S(0.5)FNLVGVINNR	2	_____________MSSFNLVGVINNRTWGPD	PF10_0077
PF3D7_1436300	PTEX150	translocon component PTEX150	No	0.520225	0.470678	0.448999	0.895495	0.118269	0.549259	-0.064209	-0.554914	-0.0346889	0.07621	0.546888	0.0956306	0.54463	-0.139935	0.75556	-0.0169601	0.101309	0.250591	0.79985	-0.83416	-0.898369	PF3D7_1436300	898	T	___1	NDGGVT(0.98)MFS(0.02)K	6	FSKNYNFSSKNDGGVTMFSKDQLEDMVKNFG	PF14_0344;Pf112
PF3D7_1121000	DHHC3	palmitoyltransferase DHHC3	No	0.51794	-0.08536	0.02222	0.33159	0.24127	0.02411	0.03749	-1.41768	-0.89974	-1.23242	-1.31778	-1.17494	-1.15272	-1.41039	-1.0788	-1.38107	-1.1398	-1.25522	-1.23111	-1.43306	-1.39557	PF3D7_1121000	236	Y	___2	MT(0.038)T(0.038)Y(0.719)EY(0.172)ILNT(0.068)S(0.864)HHS(0.1)EAEGR	4	LFGLHIFLISKKMTTYEYILNTSHHSEAEGR	PF11_0217
PF3D7_0615400		ribonuclease, putative	No	0.517727	-0.253441	-0.38434	0.012467	0.103809	-0.29406	-0.31309	-0.634686	-0.116959	0.923201	0.66976	0.46603	0.0816898	0.285604	0.298071	0.278099	0.381908	0.322201	0.028141	0.473429	0.160339	PF3D7_0615400	2307	S	___1	WNDKS(1)DVCS(1)NNK	9	NVFPECKWNDKSDVCSNNKFVILNKKEKKKI	2270.t00044;MAL6P1.272;PFF0745c
PF3D7_0401800	PfD80	Plasmodium exported protein (PHISTb), unknown function	Yes	0.517695	0.590858	0.441301	0.640045	0.69858	0.72829	0.39213	0.625015	1.14271	0.408051	0.998909	0.0851097	0.526411	0.310375	0.95042	0.26408	0.96266	0.0651798	0.79347	-0.0451298	0.347	PF3D7_0401800	307	T	___1	EGS(1)NVDIT(1)EEEEK	8	SRLEDYEKEGSNVDITEEEEKEAESVDDNNK	MAL4P1.16;PFD0080c
PF3D7_1202600	NEMF	conserved protein, unknown function	No	0.51755	0.32058	0.13104	0.56014	0.52112	0.25269	0.18159	1.78387	2.30142	2.26234	2.58292	1.92665	2.05769	1.84509	2.40523	1.63879	2.15991	1.93042	2.18311	1.81092	1.99251	PF3D7_1202600	1921	S	___1	NVS(1)FEYNENENK	3	NMKRNKENDTLKKNVSFEYNENENKNENKNE	2277.t00026;MAL12P1.26;PFL0130c
PF3D7_1467600		conserved Plasmodium protein, unknown function	No	0.517426	0.295328	0.346809	0.398365	0.388479	0.554419	0.269842	0.204805	0.722231	0.28067	0.575998	0.0941811	0.44099	0.121435	0.5198	0.00303078	0.39151	-0.110989	0.44343	-0.0904312	0.179411	PF3D7_1467600	274	S	___1	REEIS(0.893)NS(0.107)HEK	5	KTKKISNSHEKREEISNSHEKREEISNSHEK	PF14_0644
PF3D7_1149000	Pf332	antigen 332, DBL-like protein	Yes	0.51741	-1.12739	0.34303	0.87337	NaN	0.92708	NaN	-5.18119	-4.66378	-5.08792	-6.21531	-5.48377	-5.14074	-6.78395	-5.91058	NaN	-6.55181	-5.94934	-5.02226	NaN	-5.11346	PF3D7_1149000	3405	S	___1	EGS(0.829)VS(0.17)EEIVEEMGS(0.001)LTEEIVDEER	3	LDEDSITEEALEKEGSVSEEIVEEMGSLTEE	PF11_0506;PF11_0507
PF3D7_1149000	Pf332	antigen 332, DBL-like protein	Yes	0.5164	0.60706	0.51865	0.55149	0.67586	0.6876	0.50449	2.17541	2.69181	1.58319	2.19025	1.70201	2.22066	1.85661	2.4081	1.29479	1.97065	1.3319	2.0195	1.64495	2.14944	PF3D7_1149000	3066	S	___1	EGS(0.985)AT(0.015)EEIVQDGSGTNDFVGK	3	IRDETNVEEVLEKEGSATEEIVQDGSGTNDF	PF11_0506;PF11_0507
PF3D7_0810300	PPM5	protein phosphatase PPM5, putative	No	0.51462	-0.00315	0.04956	0.105	-0.07587	0.05159	0.01848	2.41484	2.92946	2.33244	2.32929	2.67918	2.72874	2.72667	2.83167	2.82089	2.74502	2.48324	2.53483	2.72427	2.74275	PF3D7_0810300	24	S	___1	RLS(1)ISTK	3	KKNSVKEKKNTRRRLSISTKIDLPDDTEEIK	MAL8P1.109
PF3D7_1347200	NT1	nucleoside transporter 1	No	0.514125	-0.29432	-0.33038	0.30741	0.33044	-0.11493	-0.61696	0.920055	1.43418	2.37342	2.0791	1.4424	1.11202	1.53884	1.84625	1.47281	1.80325	1.29879	1.18386	2.00805	1.39109	PF3D7_1347200	7	S	___1	S(0.96)T(0.96)GKES(0.96)S(0.087)KAY(0.034)ADIESR	6	_________MSTGKESSKAYADIESRGDYKD	PF13_0252
PF3D7_1462800	GAPDH	glyceraldehyde-3-phosphate dehydrogenase	No	0.51306	-0.55763	0.18952	-0.03502	0.25478	0.04478	0.26837	-3.05729	-2.54423	-2.17057	-2.7282	-2.72731	-2.53779	-2.8224	-2.85742	-3.02114	-2.76636	-2.73091	-2.68613	-2.90522	-2.63685	PF3D7_1462800	286	S	___1	GILGYTEDEVVS(1)QDFVHDNR	12	GPLKGILGYTEDEVVSQDFVHDNRSSIFDMK	PF14_0598
PF3D7_0501400	FIRA	interspersed repeat antigen	Yes	0.512946	0.09571	0.401691	0.530615	0.39959	0.656061	0.17292	0.569464	1.08241	2.10991	2.20562	0.46336	0.865051	0.768505	1.29912	0.67795	1.07754	0.17301	0.829071	0.7258	0.89872	PF3D7_0501400	1184	S	___2	KAS(1)EGDNHSLSSLSEETEEK	3	QELTTTQEHDDEKKASEGDNHSLSSLSEETE	MAL5P1.15;PFE0070w
PF3D7_0716100	SDA1	protein SDA1, putative	No	0.51182	0.38056	-0.08378	0.44266	0.34962	0.36603	-0.2627	-4.32484	-3.81302	-4.3061	-3.92554	-3.60106	-3.68484	-4.37982	-3.93716	-4.17378	-3.82416	-4.05469	-3.68866	-4.14107	-4.40377	PF3D7_0716100	686	S	___1	S(0.53)GES(0.47)VQENSLLQYSYLLGK	1	KQTAILVQKKKILNKSGESVQENSLLQYSYL	PF07_0067
PF3D7_1227600		conserved Plasmodium protein, unknown function	No	0.511476	-0.193032	0.490171	0.175066	0.124849	0.3391	-0.093769	-0.264875	0.246601	0.0474396	-0.145592	-0.54635	-0.056179	-0.247885	-0.0728188	-0.29825	-0.173401	-0.715319	-0.376219	-0.19166	-0.285429	PF3D7_1227600	306	S	___1	NMNDEEY(0.001)S(0.999)NCDKFGDMNMSYNVK	8	GRNYYLDKNMNDEEYSNCDKFGDMNMSYNVK	2277.t00267;MAL12P1.267;PFL1335w
PF3D7_0202000	KAHRP	knob-associated histidine-rich protein	Yes	0.51145	0.31986	0.62298	0.72688	0.39701	0.43407	-0.110349	1.453	1.96445	1.51237	1.83223	2.11614	2.73912	1.85712	2.584	1.50178	1.89879	2.02101	2.45508	0.66217	0.551821	PF3D7_0202000	588	S	___3	EAS(0.997)T(0.993)T(0.01)EGATK	3	ATKEASTSKGATKEASTTEGATKGASTTAGS	PF02_0020;PFB0100c
PF3D7_1130400	RPT5	26S protease regulatory subunit 6A, putative	No	0.51021	-0.08939	0.12074	0.01806	0.1644	0.39392	-0.42042	-2.60289	-2.09268	-2.24666	-2.33605	-2.57602	-2.45528	-2.55188	-2.53382	-2.58146	-2.41706	-2.82338	-2.42946	-2.20601	-2.62643	PF3D7_1130400	21	S	___1	MNVENIFGNEEVNVEEIEKLS(0.5)NS(0.5)EIK	21	IFGNEEVNVEEIEKLSNSEIKTRVSLIDTEI	PF11_0314
PF3D7_1303500	NHE	sodium/hydrogen exchanger, Na+, H+ antiporter	No	0.509181	0.40599	0.00194	0.20301	0.06567	0.212739	-0.01482	-1.44514	-0.935959	-1.45521	-1.04922	-1.22613	-1.22419	-1.30321	-1.1002	-1.27294	-1.20727	-1.18193	-0.969191	-1.18224	-1.19706	PF3D7_1303500	748	T	___2	S(0.023)Y(0.008)DS(0.08)HT(0.898)FIES(0.907)FDDY(0.124)S(0.959)CNEK	6	RTCDISFWERSYDSHTFIESFDDYSCNEKRP	PF13_0019
PF3D7_1149000	Pf332	antigen 332, DBL-like protein	Yes	0.5089	0.8531	0.49851	0.512106	0.166269	0.53327	0.477161	-1.09179	-0.58289	-1.32501	-0.47191	-0.847	-0.34849	-0.555716	-0.0436096	-1.11848	-0.952211	-0.923159	-0.389889	-1.08238	-0.605219	PF3D7_1149000	5139	T	___1	IS(0.241)T(0.759)EEVVGQDK	3	RELGDDGVEEREKISTEEVVGQDKSATGDVE	PF11_0506;PF11_0507
PF3D7_1149000	Pf332	antigen 332, DBL-like protein	Yes	0.50843	0.53514	0.84695	0.83519	NaN	0.36735	0.12219	-3.02486	-2.51643	-2.83345	-2.29831	-3.10783	-2.26088	-2.84114	-2.00595	-5.63988	NaN	-3.31986	-2.95251	-3.16882	-3.04663	PF3D7_1149000	2497	S	___1	EGFVIEEIIEEGS(1)VIEQVEDTK	13	LGKEGFVIEEIIEEGSVIEQVEDTKTVSEKS	PF11_0506;PF11_0507
PF3D7_1149000	Pf332	antigen 332, DBL-like protein	Yes	0.50839	0.17297	0.82257	-0.2017	-0.04255	0.47755	0.01576	-2.81604	-2.30765	-2.25096	-2.07799	-2.53336	-1.71079	-1.95807	-2.15977	-2.50766	-2.55021	-2.78177	-2.30422	-2.45889	-2.44313	PF3D7_1149000	5666	S	___1	NTYESDQNDEENNEES(0.969)MNELS(0.031)DELIK	16	NTYESDQNDEENNEESMNELSDELIKNNTSD	PF11_0506;PF11_0507
PF3D7_1356000		conserved Plasmodium protein, unknown function	No	0.50793	0.32888	0.22342	0.45241	0.39589	0.36231	0.29158	2.34987	2.8578	2.26234	2.59122	2.23591	2.45933	2.16987	2.62228	2.20274	2.59863	2.03079	2.3931	2.22381	2.51539	PF3D7_1356000	1236	S	___1	YDNDIHYYS(1)DCTYEK	9	LSAYTNKYDNDIHYYSDCTYEKMIDIKKNKK	PF13_0298
PF3D7_0918900	gammaGCS	gamma-glutamylcysteine synthetase	No	0.50725	0.0608	0.19306	-0.15884	0.28474	-0.14561	-0.20845	-2.90158	-2.39433	-3.42495	-3.36415	-3.88051	-3.68745	-3.80643	-3.96527	-3.07734	-2.7926	-4.09354	-4.23915	-3.22698	-3.43543	PF3D7_0918900	1044	Y	___2	T(0.496)IY(0.51)EES(0.497)MDNT(0.497)VEFAK	3	LKDDQDYCTCTRRTIYEESMDNTVEFAKKMY	PFI0925w
PF3D7_0532300		Plasmodium exported protein (PHISTb), unknown function	Yes	0.50622	0.32995	0.50619	0.3488	0.39558	0.46602	0.38987	3.61712	4.12334	3.5016	3.83155	3.75269	4.25888	3.95653	4.30533	3.81888	4.21446	3.43228	3.8983	3.65883	4.0487	PF3D7_0532300	459	S	___1	LAENQVEKEFQEVNERFS(1)EVAK	18	ENQVEKEFQEVNERFSEVAKRFKLTEKTVNF	MAL5P1.314;PFE1600w
PF3D7_1229500	CCT3	T-complex protein 1 subunit gamma	No	0.50614	0.22411	0.3713	-0.06991	0.43771	0.19228	0.2678	-1.76104	-1.2549	-1.64251	-1.4184	-1.85989	-1.48859	-1.5577	-1.62761	-1.71095	-1.27324	-1.75037	-1.55809	-1.84795	-1.58015	PF3D7_1229500	437	S	___1	S(0.99)IT(0.01)EAVASALEIIPK	1	QYLIKEAAKFNDSRKSITEAVASALEIIPKI	2277.t00285;MAL12P1.285;PFL1425w
PF3D7_1149000	Pf332	antigen 332, DBL-like protein	Yes	0.50543	0.7012	0.15032	0.22436	1.08191	0.62435	-0.1345	-2.7565	-2.25107	-3.06761	-2.36641	-3.07815	-2.92783	-2.79578	-2.57142	-3.60696	-2.52505	-3.49321	-2.86886	-2.9161	-3.0506	PF3D7_1149000	4736	T	___1	QGS(0.5)VT(0.5)EEIVEEEELDTEEVLEDK	5	DKSVIEEAVEKQGSVTEEIVEEEELDTEEVL	PF11_0506;PF11_0507
PF3D7_0615900		conserved Plasmodium protein, unknown function	No	0.50512	-0.23741	-0.07179	-0.51844	0.06397	-0.03398	-0.21485	-2.89994	-2.39482	-2.50459	-2.742	-2.3854	-2.45719	-2.4584	-2.97684	-2.51468	-2.45071	-2.41127	-2.44525	-2.62886	-2.84371	PF3D7_0615900	1076	S	___1	MES(1)FNMYK	3	SNSCNIRRGQTNRMESFNMYKEGYINNDYMT	2270.t00047;MAL6P1.267;PFF0770c
PF3D7_0108300	ARP	conserved Plasmodium protein, unknown function	No	0.50506	-0.04301	0.18596	-0.07036	0.11126	0.50882	-0.02899	-2.5983	-2.09324	-1.78956	-1.83257	-2.42566	-2.2397	-2.01029	-2.08065	-2.09457	-1.98331	-2.46396	-1.95514	-2.0094	-2.03839	PF3D7_0108300	2182	S	___1	YVEALNS(0.007)QFNFLS(0.176)RDS(0.817)R	16	YVEALNSQFNFLSRDSRKIDTENNAINILNF	MAL1P2.10;PFA0410w
PF3D7_1149000	Pf332	antigen 332, DBL-like protein	Yes	0.50473	0.51719	0.29329	0.42033	-0.141371	0.41906	0.48099	1.75817	2.2629	1.7956	2.31279	1.88	2.17329	2.22364	2.64397	-0.617359	-0.75873	1.86716	2.28622	1.71406	2.19505	PF3D7_1149000	2346	S	___1	SATEDLVEEEAS(1)VTEK	12	EVERSATEDLVEEEASVTEKVSVHEGSTTEQ	PF11_0506;PF11_0507
PF3D7_0522400		conserved Plasmodium protein, unknown function	No	0.50429	0.10963	-0.41693	0.2685	-0.04594	-0.18246	-0.24979	-3.25681	-2.75252	-2.66999	-2.56036	-2.0428	-2.45973	-2.54951	-2.28101	-2.3338	-2.37974	-1.73362	-1.91608	-2.01108	-2.26087	PF3D7_0522400	7901	S	___1	FS(1)INPFFINTTEK	2	RKNNKNIKYGLKMKFSINPFFINTTEKKKKY	MAL5P1.224;PFE1120w
PF3D7_1149000	Pf332	antigen 332, DBL-like protein	Yes	0.50398	0.49262	0.38021	0.42151	-0.12326	0.44102	0.41175	2.20786	2.71184	1.80579	2.29841	1.82886	2.20907	2.17863	2.60014	-0.72777	-0.85103	1.42566	1.86668	1.78791	2.19966	PF3D7_1149000	2583	S	___1	VIEQEGS(1)NTEVAEDVEEK	7	EQTDSVTEKVIEQEGSNTEVAEDVEEKESAS	PF11_0506;PF11_0507
PF3D7_1002800		DnaJ protein, putative	No	0.503156	-0.02068	-0.02607	0.071476	0.256611	0.117699	-0.140309	0.341885	0.845041	1.2691	1.24842	0.884991	0.858921	0.918455	0.989931	0.878229	1.13484	0.757061	0.87476	1.04856	0.908251	PF3D7_1002800	295	S	___1	ASTTTQDENIT(0.004)KQS(0.996)PQMK	14	NKASTTTQDENITKQSPQMKCDKNIKMDKHV	PF10_0032
PF3D7_1222400	ApiAP2	AP2 domain transcription factor	No	0.502696	0.061289	0.329679	0.229944	0.11928	0.149241	0.02461	0.425695	0.928391	0.570881	0.63217	0.309891	0.63957	0.466326	0.69627	0.45989	0.57917	0.4027	0.551941	0.548979	0.573589	PF3D7_1222400	1347	T	___1	NKT(1)QEIYCNNNK	3	ILNDTCIENNGKKNKTQEIYCNNNKIHNIED	2277.t00215;MAL12P1.215;PFL1075w
PF3D7_0318200	RPB1	DNA-directed RNA polymerase II subunit RPB1	No	0.502525	-0.10358	-0.03684	0.0991364	0.24194	0.111071	-0.28339	-0.593355	-0.0908298	0.32975	0.22617	-0.196749	-0.233589	-0.00803566	0.0911007	-0.0683098	0.17363	-0.33593	-0.224859	0.18786	-0.0955296	PF3D7_0318200;P24928	2305;1870	T	___2	YS(0.875)PT(0.107)S(0.018)PKY(0.001)S(0.269)PT(0.665)S(0.066)PK	11	VTSPKYSPTSPKYSPTSPKYSPTSPKYSPTS	MAL3P6.20;PFC0805w
PF3D7_0801000		Plasmodium exported protein (PHISTc), unknown function	Yes	0.502105	0.185599	0.31281	0.758542	0.531619	0.155531	0.29337	-0.899595	-0.39749	-0.425669	-0.24007	-1.23381	-0.921	-1.43261	-0.674068	-1.09324	-0.561621	-0.99925	-0.843719	-1.33486	-1.04149	PF3D7_0801000	307	S	___1	DNYAS(1)EQEYFDRGEQLNDVSADNNTSNK	5	PTQHDVPVQLRDNYASEQEYFDRGEQLNDVS	PF08_0137
PF3D7_1227700	KIC2	conserved Plasmodium protein, unknown function	No	0.50206	0.37366	0.25115	0.03173	0.464838	0.30939	0.07369	-1.39085	-0.88879	-1.40159	-1.02793	-1.58577	-1.33462	-1.1981	-1.16637	-1.43648	-0.971642	-1.71361	-1.40422	-1.3729	-1.29921	PF3D7_1227700	108	S	___1	ECNDSHKDIS(0.343)LS(0.657)R	12	PIVKECNDSHKDISLSRNENSIHNISENSYQ	2277.t00268;MAL12P1.268;PFL1340c
PF3D7_1227700	KIC2	conserved Plasmodium protein, unknown function	No	0.501941	0.091249	0.07411	0.290471	-0.22526	0.304291	-0.08626	-1.45539	-0.953449	-1.06129	-0.970041	-1.04464	-0.97053	-1.25282	-0.962349	-0.96069	-1.18595	-1.28384	-0.979549	-1.01314	-1.0994	PF3D7_1227700	580	T	___1	NEQLLNT(0.098)T(0.902)FLLQK	8	LLSKHIHRNEQLLNTTFLLQKSTLENNSLEK	2277.t00268;MAL12P1.268;PFL1340c
PF3D7_0318200	RPB1	DNA-directed RNA polymerase II subunit RPB1	No	0.501606	-0.079872	-0.0627	0.111805	0.285469	0.139389	-0.341978	-0.101015	0.400591	0.884741	0.804869	0.291521	0.228821	0.514126	0.625931	0.40509	0.690559	0.110121	0.24951	0.697319	0.355341	PF3D7_0318200;P24928	2296;1861	S	___2	Y(0.006)S(0.963)PT(0.014)S(0.017)PKY(0.086)S(0.894)PT(0.009)S(0.01)PK	2	YNVMSPVYSVTSPKYSPTSPKYSPTSPKYSP	MAL3P6.20;PFC0805w
PF3D7_0413900	USP13	ubiquitin carboxyl-terminal hydrolase 13, putative	No	0.50129	-0.359	-0.394	-0.38321	0.02861	-0.10565	0.36847	-3.98651	-3.48522	-3.22807	-3.58707	-3.34571	-3.73971	-3.33033	-3.71354	-3.38975	-3.36114	-3.2331	-3.33875	-3.56824	-3.19977	PF3D7_0413900	266	S	___1	DGEADVFS(0.002)Y(0.032)ADDENDS(0.949)VIDPY(0.016)IGVHLK	16	DGEADVFSYADDENDSVIDPYIGVHLKNLGI	MAL4P1.131;PFD0655c;PFD0680c
PF3D7_1013900		translation initiation factor eIF-2B subunit delta, putative	No	0.501265	0.0390091	-0.03459	0.150054	-0.08667	-0.160092	0.04162	-0.265215	0.23605	0.00180054	0.0408096	0.227131	0.192541	0.101706	0.25176	0.2048	0.11813	0.543051	0.382959	0.23432	0.27594	PF3D7_1013900	953	S	___1	ST(0.001)YS(0.999)LNFK	4	FNLKNGKNNFEKSTYSLNFKNHFDIKSSNIN	PF10_0136
PF3D7_1149000	Pf332	antigen 332, DBL-like protein	Yes	0.501257	0.505798	0.37754	0.557926	0.03607	0.367069	0.213722	0.271244	0.772501	0.210331	0.716129	0.39448	0.77202	0.475584	1.03351	-1.4631	-1.42703	0.0659008	0.43297	0.377989	0.591711	PF3D7_1149000	969	S	___1	VQEEDES(0.972)VT(0.028)EELPEEDIINEK	7	SEEDIINEKVQEEDESVTEELPEEDIINEKV	PF11_0506;PF11_0507
PF3D7_0501200	PIESP2	parasite-infected erythrocyte surface protein	Yes	0.50125	0.83303	0.78836	0.81739	0.24419	0.52627	0.27654	-2.31402	-1.81277	-2.68517	-1.85214	-2.17279	-1.38443	-2.34912	-1.53173	-2.38397	-2.13978	-2.44187	-1.9156	-2.72775	-2.45121	PF3D7_0501200	179	S	___1	GYYNVFFENYANDT(0.123)ES(0.877)NVHNKPEEVHK	16	GYYNVFFENYANDTESNVHNKPEEVHKHEEI	MAL5P1.13;PFE0060w
PF3D7_0202000	KAHRP	knob-associated histidine-rich protein	Yes	0.50117	0.29255	0.50625	0.57724	0.37868	0.59615	0.04328	5.21652	5.71769	4.9946	5.28715	5.80444	6.31069	5.60888	6.18612	5.21959	5.59827	5.5508	6.14695	3.70913	3.75241	PF3D7_0202000	588	S	___2	EAS(0.997)T(0.993)T(0.01)EGATK	3	ATKEASTSKGATKEASTTEGATKGASTTAGS	PF02_0020;PFB0100c
PF3D7_1201000		Plasmodium exported protein (PHISTb), unknown function	Yes	0.50045	-0.08011	0.18244	0.37945	0.38091	0.03502	-0.04741	-1.75863	-1.25818	-1.80129	-1.8814	-1.64234	-1.4599	-1.98925	-1.6098	-3.23168	-2.85077	-2.22559	-2.19057	-2.64206	-2.68947	PF3D7_1201000	403	S	___2	AVPQNS(1)GS(1)NFDEFLDVK	6	KVSNIKNNLRAVPQNSGSNFDEFLDVKEANE	2277.t00010;MAL12P1.10;PFL0050c
PF3D7_1201000		Plasmodium exported protein (PHISTb), unknown function	Yes	0.50045	-0.08011	0.18244	0.37945	0.38091	0.03502	-0.04741	-1.75863	-1.25818	-1.80129	-1.8814	-1.64234	-1.4599	-1.98925	-1.6098	-3.23168	-2.85077	-2.22559	-2.19057	-2.64206	-2.68947	PF3D7_1201000	405	S	___2	AVPQNS(1)GS(1)NFDEFLDVK	8	SNIKNNLRAVPQNSGSNFDEFLDVKEANEIV	2277.t00010;MAL12P1.10;PFL0050c
PF3D7_1140700		conserved Plasmodium protein, unknown function	No	0.500185	0.242488	0.17247	0.169855	0.532089	0.21904	0.154251	-0.552105	-0.0519199	-1.07278	-0.830292	-0.70265	-0.53018	-0.736204	-0.566349	-0.88722	-0.355131	-1.06189	-0.84285	-0.93749	-0.783239	PF3D7_1140700	998	S	___2	S(0.99)YS(0.013)NNS(0.996)AYVNR	1	KSGKNIVKNLFCNKKSYSNNSAYVNRGISEY	PF11_0418
PF3D7_1453800	GluPho	glucose-6-phosphate dehydrogenase-6-phosphogluconolactonase	No	0.4999	-0.12737	-0.00059	0.15239	0.27913	0.14345	-0.39699	1.8261	2.326	2.76291	2.63554	2.09315	2.09256	2.34755	2.49994	2.11443	2.39356	1.78026	1.92371	2.57626	2.17927	PF3D7_1453800	899	S	___1	KS(0.61)S(0.39)FYEDDLLDIN	2	NYGKNYTHRPEFVRKSSFYEDDLLDIN____	PF14_0511
PF3D7_1410300		WD repeat-containing protein, putative	No	0.49941	0.04171	-0.36689	-0.133	0.33603	-0.22219	0.23332	-3.6532	-3.15379	-3.01382	-2.97211	-2.48015	-2.84704	-2.48765	-2.62065	-2.83631	-2.50028	-2.23929	-2.46148	-2.46432	-2.231	PF3D7_1410300	1772	S	___1	T(0.08)NY(0.007)S(0.911)FVNIPIAHGVPYTNT(0.001)PLNNSSLQR	4	DNNMVDNNLPYKTNYSFVNIPIAHGVPYTNT	PF14_0101
PF3D7_1149000	Pf332	antigen 332, DBL-like protein	Yes	0.49868	0.94113	0.75055	0.91037	0.17796	0.855	0.16036	-2.06756	-1.56888	-2.60983	-1.6687	-2.33287	-1.58232	-2.10627	-1.1959	-3.02988	-2.85192	-2.45095	-1.59595	-2.44568	-2.28532	PF3D7_1149000	1481	S	___2	GS(0.126)S(0.7)T(0.174)EVVVEEQGS(0.847)VT(0.153)ENLLEEESASQGIVEK	3	LEEEGSTTEKVVKGSSTEVVVEEQGSVTENL	PF11_0506;PF11_0507
PF3D7_1149000	Pf332	antigen 332, DBL-like protein	Yes	0.49868	0.94113	0.75055	0.91037	0.17796	0.855	0.16036	-2.06756	-1.56888	-2.60983	-1.6687	-2.33287	-1.58232	-2.10627	-1.1959	-3.02988	-2.85192	-2.45095	-1.59595	-2.44568	-2.28532	PF3D7_1149000	1491	S	___2	GSSTEVVVEEQGS(0.893)VT(0.106)ENLLEEES(0.001)ASQGIVEK	13	VVKGSSTEVVVEEQGSVTENLLEEESASQGI	PF11_0506;PF11_0507
PF3D7_0202000	KAHRP	knob-associated histidine-rich protein	Yes	0.49861	0.30354	0.52494	0.56114	0.40343	0.62945	0.09156	5.16991	5.66852	4.88195	5.18549	5.72829	6.25323	5.56768	6.12882	5.17398	5.57741	5.4778	6.10725	3.59583	3.68739	PF3D7_0202000	584	T	___2	GAT(1)KEAS(0.976)T(0.022)T(0.002)EGATK	3	TSKEATKEASTSKGATKEASTTEGATKGAST	PF02_0020;PFB0100c
PF3D7_1478600	PTP3	EMP1-trafficking protein	Yes	0.49827	0.10095	0.367	0.4482	0.29784	0.2769	0.1826	1.65199	2.15026	0.68891	0.78986	1.77118	2.13818	1.6956	2.1438	1.76092	2.05876	1.85155	2.12845	1.52627	1.70887	PF3D7_1478600;PF3D7_1477000	1171;922	S	___1	CGIDVES(1)DIDIETETNPLK	7	KVKDIVSKKCGIDVESDIDIETETNPLKWHQ	PF14_0758
PF3D7_0831000	GEXP09	Plasmodium exported protein (PHISTb), unknown function	Yes	0.497475	0.242079	0.287451	0.577784	0.265429	0.50041	0.25866	0.478645	0.97612	0.5585	0.800579	0.48509	0.772541	0.634356	1.21214	0.65266	0.918089	0.4198	0.92021	0.35564	0.6143	PF3D7_0831000	119	S	___1	RS(1)LNGEYSDNPLFDYK	2	KDDNISNKWYEENKRSLNGEYSDNPLFDYKL	MAL8P1.2
PF3D7_0501400	FIRA	interspersed repeat antigen	Yes	0.497326	0.25961	0.43053	0.665945	0.219898	0.493489	0.259361	0.201275	0.698601	3.24097	3.50058	0.228661	0.659191	0.620325	1.28627	0.494431	0.714329	0.0817814	0.57527	0.19726	0.456621	PF3D7_0501400	1333	S	___2	AS(1)LGSVK	2	SWLSFGRKDKKDKKASLGSVKETYEKETQTE	MAL5P1.15;PFE0070w
PF3D7_0501400	FIRA	interspersed repeat antigen	Yes	0.497326	0.25961	0.43053	0.665945	0.219898	0.493489	0.259361	0.201275	0.698601	3.24097	3.50058	0.228661	0.659191	0.620325	1.28627	0.494431	0.714329	0.0817814	0.57527	0.19726	0.456621	PF3D7_0501400	1336	S	___2	KAS(1)LGS(1)VKETYEK	6	SFGRKDKKDKKASLGSVKETYEKETQTEEQE	MAL5P1.15;PFE0070w
PF3D7_1356000		conserved Plasmodium protein, unknown function	No	0.49685	0.41936	0.34632	0.31944	0.28041	0.32796	0.27923	2.03417	2.53102	2.06783	2.48719	1.89753	2.24385	2.11027	2.42971	2.01881	2.29922	2.06698	2.39494	2.03263	2.31186	PF3D7_1356000	1217	S	___1	MYS(1)HEALSAYTNK	3	MLNNNKTKPLGHKMYSHEALSAYTNKYDNDI	PF13_0298
PF3D7_1442400	KIC9	conserved Plasmodium protein, unknown function	No	0.4966	0.284528	0.31687	-0.165323	0.43006	0.06455	-0.297	-1.55223	-1.05563	-0.746469	-0.461941	-1.30037	-0.9835	-0.594715	-0.760038	-1.09676	-0.6667	-0.992229	-0.927679	-0.88065	-1.17765	PF3D7_1442400	407	S	___1	NYMIKGS(0.504)Y(0.032)DT(0.393)S(0.072)PNLK	7	IDSNVNMKKNYMIKGSYDTSPNLKGYIYENN	PF14_0402
PF3D7_0936800		Plasmodium exported protein (PHISTc), unknown function	Yes	0.49648	0.352829	0.48054	0.80276	0.38309	0.50141	0.22327	1.16782	1.6643	0.679911	1.03274	1.37754	1.85808	1.05551	1.85827	1.16382	1.54691	1.18001	1.68142	1.16005	1.38332	PF3D7_0936800	87	S	___1	S(0.001)LS(0.999)DEINK	3	SHSTSDPKKNEEKSLSDEINKCDMKKYTAEE	PFI1780w
PF3D7_1149000	Pf332	antigen 332, DBL-like protein	Yes	0.49624	0.49792	0.40109	0.55105	0.3283	0.49105	0.293	1.52437	2.02061	1.494	1.99192	1.53015	1.93124	1.51287	2.06392	0.22156	0.54986	1.28833	1.77938	1.33375	1.62675	PF3D7_1149000	1000	S	___1	VQEEEESAYQEIVQDGS(1)VTK	17	QEEEESAYQEIVQDGSVTKDVEYKELVNDDV	PF11_0506;PF11_0507
PF3D7_0302500	CLAG3.1	cytoadherence linked asexual protein 3.1	Yes	0.496237	0.228378	0.224602	0.323996	0.213579	0.228119	0.08667	-0.628836	-0.132599	-0.15143	0.0769482	-0.243731	-0.0191288	-0.221945	0.102051	-0.37466	-0.161081	-0.258869	-0.0307503	-0.59852	-0.51185	PF3D7_0302500	1326	T	___1	MS(0.094)T(0.906)YVDDFAFFDDCGK	3	LRRYDMENAFKNKMSTYVDDFAFFDDCGKNE	MAL3P1.5;PFC0120w
PF3D7_1149000	Pf332	antigen 332, DBL-like protein	Yes	0.49598	0.53027	0.50087	0.5047	0.47051	0.491569	0.48713	1.54802	2.044	1.06611	1.59638	1.24408	1.74495	1.27834	1.78304	0.83786	1.30837	0.899221	1.39079	1.05745	1.54458	PF3D7_1149000	3068	T	___1	EGS(0.005)AT(0.995)EEIVQDGSGTNDFVGK	5	DETNVEEVLEKEGSATEEIVQDGSGTNDFVG	PF11_0506;PF11_0507
PF3D7_0319200	CCR4-4	endonuclease/exonuclease/phosphatase family protein, putative	No	0.49564	0.0735	0.21702	-0.55183	0.28587	0.05919	0.05557	-3.24336	-2.74772	-2.93259	-2.85909	-2.66543	-2.44841	-2.51521	-3.06704	-2.6082	-2.32233	-2.59599	-2.5368	-2.48105	-2.42548	PF3D7_0319200	376	S	___1	S(1)GELINNIIDNINENK	1	KEQNGKDKTLIKEEKSGELINNIIDNINENK	MAL3P6.29;PFC0850c
PF3D7_1334500	MSRP6	MSP7-like protein	Yes	0.495636	0.544729	0.69574	0.540074	0.197979	0.511719	0.467151	0.378515	0.874151	0.822861	1.36759	0.69858	1.39432	0.627476	1.16755	-0.17654	0.0214386	0.697811	1.20953	0.389849	0.857	PF3D7_1334500	105	S	___1	YGEGS(0.272)IFY(0.011)DES(0.717)K	11	DSTGKYGEGSIFYDESKKYNYRKYLDIENEL	PF13_0192
PF3D7_0401800	PfD80	Plasmodium exported protein (PHISTb), unknown function	Yes	0.49531	0.05348	0.55044	0.5571	0.35092	0.23981	0.13971	1.82656	2.32187	1.7851	1.83858	2.357	2.90744	1.74463	2.30173	1.52088	1.8718	1.6982	1.93801	1.19144	1.33115	PF3D7_0401800	166	T	___1	S(0.994)AS(0.004)T(0.003)AS(0.376)T(0.624)AR	7	SASAASTTRSASTASTARSASTASTASAASA	MAL4P1.16;PFD0080c
PF3D7_1458500	SAS4	spindle assembly abnormal protein 4, putative	No	0.49432	-0.24647	0.97498	0.47689	0.4253	-0.7756	-0.30806	-4.25774	-3.76342	-4.17307	-4.41954	-4.95618	-3.9812	-4.48703	-4.01014	-5.15193	-4.72663	-4.25381	-5.02941	-4.93733	-5.24539	PF3D7_1458500	670	S	___1	ENS(1)IDICVDLNDEEPWDENIK	3	LEKEVNDEEIKTRENSIDICVDLNDEEPWDE	PF14_0558
PF3D7_1346300	ALBA2	DNA/RNA-binding protein Alba 2	No	0.49404	-0.17218	-0.19838	0.27836	0.46181	-0.01075	-0.66754	2.65771	3.15175	4.2055	4.03332	3.19089	2.99251	3.41135	3.68971	3.35165	3.81346	2.98226	2.97151	3.98924	3.3217	PF3D7_1346300	7	S	___2	PGS(0.461)T(0.54)KS(0.996)DT(0.003)KLENEIR	6	_________MPGSTKSDTKLENEIRISYKSD	MAL13P1.233
PF3D7_1412700		AAA family ATPase, putative	No	0.49258	0.30879	0.45645	0.03202	0.37608	-0.01117	-0.05344	-2.38942	-1.89684	-2.05998	-1.75119	-1.66367	-1.20722	-1.89834	-1.86632	-2.06156	-1.68548	-1.66883	-1.68	-1.91851	-1.97195	PF3D7_1412700	1070	S	___1	S(0.5)S(0.5)YDHIHNYTFNK	1	HPKNSNQKINNHITKSSYDHIHNYTFNKNNM	PF14_0126
PF3D7_1412700		AAA family ATPase, putative	No	0.49258	0.30879	0.45645	0.03202	0.37608	-0.01117	-0.05344	-2.38942	-1.89684	-2.05998	-1.75119	-1.66367	-1.20722	-1.89834	-1.86632	-2.06156	-1.68548	-1.66883	-1.68	-1.91851	-1.97195	PF3D7_1412700	1071	S	___1	S(0.5)S(0.5)YDHIHNYTFNK	2	PKNSNQKINNHITKSSYDHIHNYTFNKNNMN	PF14_0126
PF3D7_1436300	PTEX150	translocon component PTEX150	No	0.492477	0.081308	0.14225	0.227325	0.14823	0.35324	0.259661	-0.293886	0.198591	-0.70433	-0.623022	-0.659679	-0.517429	-0.795244	-0.567919	-0.59869	-0.45046	-1.2254	-0.87216	-0.805271	-0.54561	PF3D7_1436300	940	S	___1	NNS(1)NDDDDMDNGYVTFDGK	3	SRKENPFVPTNTKNNSNDDDDMDNGYVTFDG	PF14_0344;Pf112
PF3D7_0817300		conserved Plasmodium protein, unknown function	No	0.49246	0.0578	0.5907	0.78752	0.09311	0.04326	0.32052	-1.74737	-1.25491	-1.75808	-1.70028	-2.00975	-1.41905	-2.08508	-1.29756	-1.83363	-1.74052	-2.14161	-2.09835	-2.12676	-1.80624	PF3D7_0817300	17	S	___2	NNS(0.014)S(0.024)NS(0.981)S(0.981)NENNNNDENVSLHAER	6	EVHLEENKVKNNSSNSSNENNNNDENVSLHA	PF08_0060
PF3D7_1447800		calponin homology domain-containing protein, putative	No	0.491776	0.151478	0.31233	0.327274	0.240759	0.289629	0.056361	0.278234	0.77001	-0.0194397	0.132038	-0.20072	0.11161	-0.0601444	0.26713	0.0183296	0.259089	-0.772999	-0.48337	0.133249	0.18961	PF3D7_1447800	1080	S	___1	KELIIDEEEELEEDIS(0.88)S(0.12)NEIHR	16	KELIIDEEEELEEDISSNEIHRLEKEMDTNE	PF14_0454
PF3D7_0922500	PGK	phosphoglycerate kinase	No	0.49142	0.38465	0.51609	0.51921	0.33829	0.26156	0.20504	1.19538	1.6868	1.04323	1.42788	1.56722	2.08331	1.22014	1.73935	1.28046	1.61875	1.32326	1.58482	1.3502	1.55524	PF3D7_0922500	7	S	___1	LS(1)ISDLK	2	_________MLGNKLSISDLKDIKNKKVLVR	PFI1105w
PF3D7_0812500		RNA-binding protein, putative	No	0.491146	-0.13518	-0.08857	0.01789	0.26021	0.05611	-0.47038	0.956074	1.44722	1.35293	1.21775	0.569231	0.480661	1.02875	1.04664	1.00736	1.26757	0.41844	0.47455	1.3586	0.88822	PF3D7_0812500	503	T	___2	S(0.981)IEGS(0.142)T(0.876)KNENLK	6	HKTNEESYKRSIEGSTKNENLKNDKVTKSAS	PF08_0086
PF3D7_1467600		conserved Plasmodium protein, unknown function	No	0.490995	0.174938	0.272939	0.866136	0.39045	0.47125	0.208752	-0.404594	0.086401	-0.35939	-0.184452	-0.567289	-0.29435	-0.610235	0.255901	-0.669001	-0.278551	-0.81097	-0.33972	-0.680111	-0.471359	PF3D7_1467600	1945	S	___2	KGS(1)NES(1)NNINNNNNNNNNK	3	NQNIVKPNESYSRKGSNESNNINNNNNNNNN	PF14_0644
PF3D7_1467600		conserved Plasmodium protein, unknown function	No	0.490995	0.174938	0.272939	0.866136	0.39045	0.47125	0.208752	-0.404594	0.086401	-0.35939	-0.184452	-0.567289	-0.29435	-0.610235	0.255901	-0.669001	-0.278551	-0.81097	-0.33972	-0.680111	-0.471359	PF3D7_1467600	1948	S	___2	KGS(1)NES(1)NNINNNNNNNNNK	6	IVKPNESYSRKGSNESNNINNNNNNNNNKGM	PF14_0644
PF3D7_0503500		protein kinase, putative	No	0.49092	0.2404	0.54808	0.41026	-0.00448	0.38988	0.227	-2.87458	-2.38366	-2.65702	-2.41662	-2.7026	-2.15452	-2.50591	-2.09565	-2.63184	-2.63632	-2.77122	-2.38134	-2.3948	-2.1678	PF3D7_0503500	741	S	___1	EENKS(0.997)PQFIS(0.002)DT(0.002)NLFNNNNIQNNVTLK	5	YHISLPKENMKEENKSPQFISDTNLFNNNNI	MAL5P1.35;PFE0170c
PF3D7_0922100		ubiquitin-like protein, putative	No	0.490236	0.125189	0.20459	0.075266	-0.09844	-0.09934	-0.10989	-0.868385	-0.378149	-0.58765	-0.462461	-0.73798	-0.53339	-0.469975	-0.394709	-0.397131	-0.495571	-0.395859	-0.495199	-0.49008	-0.59997	PF3D7_0922100	1210	S	___3	S(0.001)AS(0.003)HS(0.131)FS(0.865)DAT(0.982)S(0.471)S(0.547)HQEK	7	KDTNSYKSKSASHSFSDATSSHQEKQEKKNN	PFI1085w
PF3D7_0922100		ubiquitin-like protein, putative	No	0.490236	0.125189	0.20459	0.075266	-0.09844	-0.09934	-0.10989	-0.868385	-0.378149	-0.58765	-0.462461	-0.73798	-0.53339	-0.469975	-0.394709	-0.397131	-0.495571	-0.395859	-0.495199	-0.49008	-0.59997	PF3D7_0922100	1215	S	___3	SASHS(0.001)FS(0.091)DAT(0.153)S(0.964)S(0.791)HQEK	12	YKSKSASHSFSDATSSHQEKQEKKNNLHNEN	PFI1085w
PF3D7_0922100		ubiquitin-like protein, putative	No	0.490236	0.125189	0.20459	0.075266	-0.09844	-0.09934	-0.10989	-0.868385	-0.378149	-0.58765	-0.462461	-0.73798	-0.53339	-0.469975	-0.394709	-0.397131	-0.495571	-0.395859	-0.495199	-0.49008	-0.59997	PF3D7_0922100	1213	T	___3	S(0.001)AS(0.003)HS(0.131)FS(0.865)DAT(0.982)S(0.471)S(0.547)HQEK	10	NSYKSKSASHSFSDATSSHQEKQEKKNNLHN	PFI1085w
PF3D7_0500800	MESA	mature parasite-infected erythrocyte surface antigen	Yes	0.48973	0.8077	1.06453	1.12433	0.36152	0.65276	0.59109	-2.27988	-1.79015	-2.06575	-1.25805	-1.67773	-0.613199	-1.86036	-0.736029	-2.22847	-1.86695	-1.74316	-1.0904	-2.50388	-1.91279	PF3D7_0500800	100	S	___1	TFDEDHLYS(1)IR	9	SLEEIMRTFDEDHLYSIRNYIECLRNAPYID	MAL5P1.9;PFE0040c
PF3D7_0308600	PRPF19	pre-mRNA-processing factor 19, putative	No	0.48864	0.21327	-0.36866	0.04684	0.48257	0.26976	-0.9083	-5.71426	-5.22562	-5.07857	-4.8653	-4.82964	-5.1983	-5.00941	-4.96257	-5.52088	-5.03831	-4.96676	-4.697	-4.84677	-5.75507	PF3D7_0308600	2	S	___1	S(0.319)IICT(0.319)IS(0.319)GQT(0.043)PEEPVISK	1	______________MSIICTISGQTPEEPVI	MAL3P3.8;PFC0365w
PF3D7_1467600		conserved Plasmodium protein, unknown function	No	0.487206	0.223	0.38074	0.25739	0.407389	0.455829	0.13437	0.967304	1.45451	1.11202	1.33502	0.96723	1.34797	1.24523	1.50262	0.964331	1.37172	0.826281	1.28211	1.2271	1.36147	PF3D7_1467600	1945	S	___1	KGS(1)NES(1)NNINNNNNNNNNK	3	NQNIVKPNESYSRKGSNESNNINNNNNNNNN	PF14_0644
PF3D7_1438400	MCA2	metacaspase-like protein	No	0.48709	0.21301	0.22695	0.14112	0.352628	0.17619	0.29359	-1.47293	-0.98584	-1.28645	-1.07344	-1.3308	-1.10385	-1.24935	-1.10823	-1.33802	-0.985392	-1.31154	-1.13535	-1.41222	-1.11863	PF3D7_1438400	1536	S	___1	NNINISDKYFLS(0.976)ET(0.024)DSPYIGK	12	EKIKNNINISDKYFLSETDSPYIGKKKALMI	PF14_0362;PF14_0363
PF3D7_1234900		conserved Plasmodium protein, unknown function	No	0.487015	0.252589	0.48312	0.574224	0.35827	0.5223	0.1282	0.017395	0.50441	-0.352589	-0.1	-0.53018	-0.04706	-0.463064	0.11116	-0.34024	0.0180302	-0.759109	-0.236809	-0.38253	-0.25433	PF3D7_1234900	24	S	___1	SSFLS(0.001)RPGS(0.999)R	9	SSNSSSRSSFLSRPGSRDMNRGNNTSAQNYS	2277.t00337;PF12_0003;PFL1685w
PF3D7_0802300	PWP2	periodic tryptophan protein 2, putative	No	0.48689	0.12133	0.24747	-0.5764	0.00412	-0.06083	0.521	-3.9046	-3.41771	-3.60284	-3.48151	-3.70372	-3.45625	-3.15703	-3.73343	-3.93737	-3.93325	-3.44663	-3.50746	-3.98043	-3.45943	PF3D7_0802300	859	Y	___1	Y(0.002)LT(0.002)S(0.002)EGT(0.002)HIY(0.011)ELDIS(0.474)DEEGDIY(0.503)LDNY(0.003)K	22	THIYELDISDEEGDIYLDNYKIMNRKKKQNL	PF08_0130
PF3D7_0730900	PTP4	EMP1-trafficking protein	Yes	0.486307	0.347698	0.41454	0.608876	0.110048	-0.041891	0.299089	-0.484926	0.00138092	-0.38657	-0.0388718	-0.724829	-0.310289	-0.723225	-0.114349	-0.869909	-0.759861	-0.455179	-0.49707	-0.75066	-0.451571	PF3D7_0730900	1486	S	___1	S(0.009)FS(0.08)S(0.91)QGIREDFPYK	4	MKGQKYGSKNVRSFSSQGIREDFPYKNENNH	MAL7P1.171
PF3D7_0730900	PTP4	EMP1-trafficking protein	Yes	0.486187	0.324839	0.437531	0.417286	0.296141	0.3887	0.26181	-0.457886	0.0283012	-0.0230999	0.301739	-0.41111	0.0264206	-0.398855	0.0184307	-0.681511	-0.38537	-0.723289	-0.334589	-0.81591	-0.5541	PF3D7_0730900	1773	S	___1	NS(1)LHKEEK	2	NETHKLKSDIGNFKNSLHKEEKNVTDKLKPN	MAL7P1.171
PF3D7_1452600		conserved Plasmodium protein, unknown function	No	0.48609	-0.17504	0.10841	0.09071	-0.2581	0.00864	-0.22943	-2.86884	-2.38275	-2.25032	-2.42536	-2.30912	-2.20071	-2.13146	-2.04075	-2.11908	-2.37718	-1.87739	-1.86875	-1.78673	-2.01616	PF3D7_1452600	1581	S	___1	RLS(0.5)IES(0.5)VEANFLTYK	3	NDNINYLKENFSKRLSIESVEANFLTYKRIL	PF14_0501
PF3D7_1452600		conserved Plasmodium protein, unknown function	No	0.48609	-0.17504	0.10841	0.09071	-0.2581	0.00864	-0.22943	-2.86884	-2.38275	-2.25032	-2.42536	-2.30912	-2.20071	-2.13146	-2.04075	-2.11908	-2.37718	-1.87739	-1.86875	-1.78673	-2.01616	PF3D7_1452600	1584	S	___1	RLS(0.5)IES(0.5)VEANFLTYK	6	INYLKENFSKRLSIESVEANFLTYKRILNDD	PF14_0501
PF3D7_0401800	PfD80	Plasmodium exported protein (PHISTb), unknown function	Yes	0.486077	0.724247	-0.023119	0.616167	-0.16	0.53303	0.19347	-0.697016	-0.210939	-0.678339	0.045908	-0.35214	-0.375259	-0.233496	0.382671	-0.66325	-0.82325	-0.0464897	0.48654	-0.48741	-0.29394	PF3D7_0401800	78	S	___3	RSPST(0.001)AS(0.987)T(0.012)STSLR	7	CSSLASTTKRSPSTASTSTSLRSASTASTAS	MAL4P1.16;PFD0080c
PF3D7_1030300		conserved Plasmodium protein, unknown function	No	0.485466	0.203009	0.24506	0.376586	0.341719	0.04776	0.17366	0.720104	1.20557	0.64439	0.847399	0.752501	0.997561	0.825214	1.2018	0.733231	1.07495	0.85359	0.90135	0.775709	0.949369	PF3D7_1030300	332	S	___1	IS(0.006)NS(0.994)GNFDFSNNVETYK	4	NNNVNSKNNNTKISNSGNFDFSNNVETYKTI	PF10_0296
PF3D7_0609000	NUP637	conserved Plasmodium protein, unknown function	No	0.48525	0.1837	-0.15567	-0.24265	-0.23194	-0.10676	-0.08875	-3.53218	-3.04693	-3.27257	-3.08887	-3.75668	-3.91235	-3.30266	-3.54531	-3.80105	-4.03299	-3.08872	-3.19548	-3.6996	-3.78835	PF3D7_0609000	5709	S	___2	YIYNNY(0.005)DDDDY(0.481)DGDDDS(0.516)NNS(0.516)Y(0.481)NNIFK	20	NYDDDDYDGDDDSNNSYNNIFKTQNDYDRNT	2270.t00223;MAL6P1.93;PFF0445w
PF3D7_1353100		Plasmodium exported protein, unknown function	Yes	0.48434	0.33527	0.44041	0.4384	0.2097	0.31333	0.09481	4.21376	4.6981	4.0138	4.34907	4.0403	4.48071	4.33797	4.77637	4.0712	4.2809	4.23182	4.54515	3.72933	3.82414	PF3D7_1353100	273	S	___1	YGS(0.98)GS(0.02)HDHEEEVVEA	3	DNKSKKKPKDNKRYGSGSHDHEEEVVEA___	PF13_0275
PF3D7_1343000	PMT	phosphoethanolamine N-methyltransferase	No	0.48421	0.35419	0.52377	0.18157	0.11122	0.49592	0.26338	-1.93931	-1.4551	-1.6909	-1.33671	-1.82208	-1.29831	-1.52988	-1.34831	-1.72594	-1.61472	-1.92468	-1.42876	-1.84775	-1.58437	PF3D7_1343000	9	S	___1	T(0.005)LIENLNS(0.994)DKT(0.001)FLENNQYTDEGVK	8	_______MTLIENLNSDKTFLENNQYTDEGV	MAL13P1.214
PF3D7_1430300		acid phosphatase, putative	No	0.48379	-0.36441	0.72139	0.53402	0.07466	0.62057	0.23031	-3.23627	-2.75248	-2.77241	-3.13682	-3.9077	-3.18631	-3.23975	-2.70573	-3.59052	-3.51586	-4.14341	-3.52284	-3.92255	-3.69224	PF3D7_1430300	2290	S	___2	S(0.003)S(0.003)LHS(0.068)IS(0.629)NS(0.644)S(0.653)VNPFVFDSLNVFR	7	NILNKEIKKSSLHSISNSSVNPFVFDSLNVF	PF14_0282
PF3D7_1430300		acid phosphatase, putative	No	0.48379	-0.36441	0.72139	0.53402	0.07466	0.62057	0.23031	-3.23627	-2.75248	-2.77241	-3.13682	-3.9077	-3.18631	-3.23975	-2.70573	-3.59052	-3.51586	-4.14341	-3.52284	-3.92255	-3.69224	PF3D7_1430300	2292	S	___2	S(0.003)S(0.003)LHS(0.068)IS(0.629)NS(0.644)S(0.653)VNPFVFDSLNVFR	9	LNKEIKKSSLHSISNSSVNPFVFDSLNVFRR	PF14_0282
PF3D7_1430300		acid phosphatase, putative	No	0.48379	-0.36441	0.72139	0.53402	0.07466	0.62057	0.23031	-3.23627	-2.75248	-2.77241	-3.13682	-3.9077	-3.18631	-3.23975	-2.70573	-3.59052	-3.51586	-4.14341	-3.52284	-3.92255	-3.69224	PF3D7_1430300	2293	S	___2	S(0.003)S(0.003)LHS(0.068)IS(0.629)NS(0.644)S(0.653)VNPFVFDSLNVFR	10	NKEIKKSSLHSISNSSVNPFVFDSLNVFRRE	PF14_0282
PF3D7_0906600		zinc finger protein, putative	No	0.483517	0.362409	0.35552	0.251085	0.0780108	0.25201	-0.076531	0.0694141	0.552931	0.0162296	0.378639	0.00582123	0.361341	0.000545502	0.251631	0.0615692	0.13958	0.0752907	0.327301	0.18392	0.107389	PF3D7_0906600	588	S	___1	CSS(0.003)T(0.054)S(0.942)NLLTDINCTNK	5	EETTSGEKFGRCSSTSNLLTDINCTNKQDTT	PFI0325c
PF3D7_1354900		conserved Plasmodium protein, unknown function	No	0.482216	0.167198	0.024251	0.409975	0.433558	0.34022	0.244162	-0.787636	-0.30542	-0.609909	-0.442711	-0.78021	-0.755959	-0.758844	-0.348869	-1.00879	-0.575232	-0.949009	-0.608789	-0.960051	-0.715889	PF3D7_1354900	175	S	___1	VHNNINNDEDNNLPNDFFDS(1)LNNENNIDEK	20	INNDEDNNLPNDFFDSLNNENNIDEKLPKNL	PF13_0290
PF3D7_0730900	PTP4	EMP1-trafficking protein	Yes	0.4822	0.10156	0.46592	0.40372	0.409551	0.301411	0.13237	1.39352	1.87572	1.23782	1.33938	1.45595	1.92187	1.1126	1.51632	0.986139	1.39569	0.55225	0.853661	1.03804	1.17041	PF3D7_0730900	1797	S	___1	ENES(0.999)NKGT(0.001)NVPDKLK	4	TDKLKPNFESSKENESNKGTNVPDKLKIEKD	MAL7P1.171
PF3D7_1473200		DnaJ protein, putative	No	0.48216	-0.07673	-0.09735	0.24612	0.40283	0.17272	0.29018	-2.44995	-1.96779	-2.17152	-2.24825	-2.05765	-2.155	-2.08912	-1.843	-2.25027	-1.84744	-2.15375	-1.98103	-2.03396	-1.74378	PF3D7_1473200	159	S	___2	SEIS(0.001)GNS(0.433)ENARNS(0.566)ENFGNSEIS(0.001)ENS(0.17)ES(0.828)AER	27	NSENFGNSEISENSESAERSRIPEDCPTPEN	PF14_0700
PF3D7_0501400	FIRA	interspersed repeat antigen	Yes	0.48194	-1.51718	0.10627	0.16148	0.05964	0.08234	-0.17161	2.01408	2.49602	-4.04886	-5.56604	2.1839	2.29017	2.25248	2.41396	2.33797	2.39761	1.79808	1.88042	2.40033	2.22872	PF3D7_0501400	439	S	___1	KS(0.776)S(0.224)WLK	2	LSEETQEKSHTKKKKSSWLKFGRGNKNDKKN	MAL5P1.15;PFE0070w
PF3D7_0305200		conserved Plasmodium protein, unknown function	No	0.481115	0.209669	0.0995296	0.664686	0.107439	0.24671	0.022922	0.287125	0.76824	0.26251	0.472179	0.0322704	0.1318	-0.195885	0.468801	-0.165421	-0.0579815	-0.22925	0.0174599	-0.146341	-0.123419	PF3D7_0305200	188	S	___1	S(0.078)T(0.059)S(0.863)INYTDNSFVLNK	3	YENVLNDNFIKSRSTSINYTDNSFVLNKENL	MAL3P2.16;PFC0235w
PF3D7_0113200		Plasmodium exported protein, unknown function	Yes	0.48047	0.36003	0.381069	0.48694	0.25802	0.37278	0.14889	1.72762	2.20809	1.57628	1.93631	0.886761	1.26783	1.70629	2.19323	1.49609	1.75411	1.49282	1.8656	1.21713	1.36602	PF3D7_0113200	339	S	___1	SNNPPRQDS(1)QTSYYGR	9	YSRYTSRSNNPPRQDSQTSYYGRYTSRTNNQ	MAL1P3.08;PFA0630c
PF3D7_1466200	EGXP	conserved Plasmodium protein, unknown function	No	0.479706	-0.001682	0.420712	0.682964	0.22086	0.169019	0.302691	-0.845205	-0.365499	-0.648329	-0.650011	-0.954741	-0.534029	-0.925924	-0.24296	-1.0217	-0.80084	-0.77375	-0.604731	-1.05547	-0.752779	PF3D7_1466200	44	T	___1	IYVIEDDNT(0.998)DS(0.002)EDK	9	NKNIVRKIYVIEDDNTDSEDKKICKNRRLDL	PF14_0631
PF3D7_0815800	VPS9	vacuolar protein sorting-associated protein 9, putative	No	0.47919	0.03338	0.00464	-0.08146	0.42819	0.31055	0.28081	-2.32778	-1.84859	-1.83349	-1.80011	-1.86225	-1.85761	-1.93349	-2.01495	-1.98834	-1.56015	-2.19373	-1.88318	-1.96367	-1.68286	PF3D7_0815800	1577	S	___1	NPNEYVQQDT(0.007)FKQS(0.993)EEDVDYLK	14	VKNPNEYVQQDTFKQSEEDVDYLKSGLNNRP	MAL8P1.82
PF3D7_1013200		conserved Plasmodium protein, unknown function	No	0.479065	-0.03281	-0.09563	0.23345	-0.07027	0.02265	-0.07682	0.318205	0.79727	1.19233	1.15952	1.28459	1.18896	1.11077	1.34422	1.19078	1.12051	1.24471	1.26736	1.27338	1.19656	PF3D7_1013200	82	S	___1	IERT(0.004)DS(0.996)NIPDSNENVENK	6	TNKEENILIKIERTDSNIPDSNENVENKIEI	PF10_0129
PF3D7_1442900	ARFGEF	protein transport protein SEC7, putative	No	0.47903	-0.28395	-0.04406	-0.19738	-0.228	0.0834	-0.129589	-2.4809	-2.00187	-1.48568	-1.76963	-1.22599	-1.27005	-1.18172	-1.3791	-1.03203	-1.26003	-1.00051	-0.91711	-0.960171	-1.08976	PF3D7_1442900	2165	S	___1	ILVDIYMHS(1)HEAR	9	FVRRKERILVDIYMHSHEARGEKHRDERNRN	PF14_0407
PF3D7_1330800		RNA-binding protein, putative	No	0.4783	0.01771	-0.13603	-0.3149	0.05931	0.3912	0.03982	-1.57783	-1.09953	-1.54093	-1.52322	-1.70792	-1.84395	-1.73715	-2.05205	-1.86945	-1.81014	-2.45546	-2.06426	-1.75379	-1.71397	PF3D7_1330800	35	S	___1	ADDSNVDNKAT(1)ES(0.999)T(0.994)AVDS(0.008)EAK	13	DIKADDSNVDNKATESTAVDSEAKMEISSKV	PF13_0165
PF3D7_0208400		conserved Plasmodium protein, unknown function	No	0.47745	0.00469	0.04988	0.08052	-0.06799	-0.15171	0.10263	-2.89385	-2.4164	-2.19413	-2.18944	-1.93675	-1.88687	-2.00072	-1.9202	-2.08562	-2.15361	-1.68773	-1.83944	-1.9443	-1.84167	PF3D7_0208400	645	S	___1	RLQS(1)LDDMYK	4	DELYIYFNKILKRLQSLDDMYKINHEVKMFG	PF02_0080;PFB0380c
PF3D7_0824900		conserved Plasmodium protein, unknown function	No	0.47728	0.12596	0.47446	1.92477	0.05121	-0.32652	0.92943	-5.27291	-4.79563	-5.15297	-5.02701	-4.76357	-4.28911	-6.33741	-4.41264	-4.84936	-4.79815	-4.63606	-4.96258	-5.59258	-4.66315	PF3D7_0824900	817	S	___1	QEINES(1)NES(1)LDERIDEEIER	6	NPINDVKRSKQEINESNESLDERIDEEIERN	PF08_0027
PF3D7_0202000	KAHRP	knob-associated histidine-rich protein	Yes	0.47662	-0.175242	0.08222	0.09143	0.558849	-0.30589	-0.59316	-2.07423	-1.59761	-0.513769	-0.689011	-2.61085	-2.52863	-1.27733	-1.1859	-1.37635	-0.817501	-1.56805	-1.87394	-0.83135	-1.42451	PF3D7_0202000	343	Y	___3	Y(0.955)S(0.045)S(0.001)FSSVNK	1	SAPYGVPHGAAHGSRYSSFSSVNKYGKHGDE	PF02_0020;PFB0100c
PF3D7_0922500	PGK	phosphoglycerate kinase	No	0.476526	0.514738	0.673941	0.417687	0.48111	0.41082	0.26297	0.444704	0.92123	0.11059	0.625328	0.540319	1.21426	0.403755	0.821442	0.383039	0.864149	0.18428	0.5951	0.49449	0.75746	PF3D7_0922500	9	S	___1	LS(0.5)IS(0.5)DLK	4	_______MLGNKLSISDLKDIKNKKVLVRVD	PFI1105w
PF3D7_0703200		conserved Plasmodium protein, unknown function	No	0.47646	0.0341	0.00502	-0.08052	-0.00078	0.48879	-0.11903	-1.91516	-1.4387	-1.3442	-1.3101	-1.53195	-1.52693	-1.4369	-1.51742	-1.74916	-1.74994	-2.00751	-1.51872	-1.4875	-1.60653	PF3D7_0703200	1456	S	___1	QNFLT(0.015)Y(0.025)QS(0.96)DDDDKCS(0.001)KPK	8	NLSYDLTKQNFLTYQSDDDDKCSKPKYVKDR	PF07_0012
PF3D7_0823300	GCN5	histone acetyltransferase GCN5	No	0.476275	-0.314652	-0.30666	-0.220083	0.15138	0.169769	-0.428588	-0.921425	-0.44515	0.0328598	-0.281792	-0.55744	-0.8641	-0.400866	-0.620949	-0.53614	-0.38476	-0.767429	-0.59766	-0.250441	-0.679029	PF3D7_0823300	644	S	___2	VHS(0.434)NS(0.613)S(0.693)NY(0.294)NNNNNNNS(0.887)DS(0.078)NNK	6	ENNEFENIKRVHSNSSNYNNNNNNNSDSNNK	MAL8P1.39;PF08_0034
PF3D7_1117900		conserved Plasmodium protein, unknown function	No	0.475945	0.386879	0.345939	0.518916	0.3384	0.410759	0.286361	0.856535	1.33248	0.927591	1.31447	0.826811	1.17275	0.907484	1.4264	0.98037	1.31877	0.854111	1.26487	0.868589	1.15495	PF3D7_1117900	1414	S	___2	S(1)IDTNIVETK	1	RPPFVNETNASTRSKSIDTNIVETKNVQHSY	PF11_0185
PF3D7_1117900		conserved Plasmodium protein, unknown function	No	0.475945	0.386879	0.345939	0.518916	0.3384	0.410759	0.286361	0.856535	1.33248	0.927591	1.31447	0.826811	1.17275	0.907484	1.4264	0.98037	1.31877	0.854111	1.26487	0.868589	1.15495	PF3D7_1117900	1412	S	___2	S(0.972)KS(0.778)IDT(0.248)NIVET(0.003)K	1	KIRPPFVNETNASTRSKSIDTNIVETKNVQH	PF11_0185
PF3D7_1473200		DnaJ protein, putative	No	0.475906	-0.06455	-0.074631	0.054207	0.189609	-0.0975515	-0.23012	-0.0915451	0.384361	0.62327	0.55872	0.262671	0.18804	0.291664	0.345871	0.205191	0.3948	0.144581	0.0470295	0.40988	0.17976	PF3D7_1473200	3	S	___1	S(0.5)S(0.5)KQDVDLYEILGVNR	2	_____________MSSKQDVDLYEILGVNRR	PF14_0700
PF3D7_0424700	FIKK4.2	serine/threonine protein kinase, FIKK family	Yes	0.4755	0.34144	0.38366	-0.174493	0.27707	0.32333	0.2747	1.88189	2.35739	1.70678	2.04822	1.84284	2.2265	-0.360556	-0.535049	2.07804	2.35511	1.75607	2.0794	1.82776	2.10246	PF3D7_0424700	123	S	___1	TEENS(1)EEIRK	5	RCSNLLKEKKKTEENSEEIRKYLSDKTKKRN	MAL4P1.230;PFD1175w
PF3D7_0202000	KAHRP	knob-associated histidine-rich protein	Yes	0.47538	0.17774	0.44517	0.31038	0.28541	0.31894	0.0623	5.65422	6.1296	5.89229	6.07003	5.95298	6.39815	5.99618	6.30656	5.94812	6.23353	5.85747	6.17641	5.29259	5.35489	PF3D7_0202000	599	T	___3	GAS(0.991)T(0.961)T(0.048)AGS(0.965)T(0.03)T(0.005)GATTGANAVQSK	4	TKEASTTEGATKGASTTAGSTTGATTGANAV	PF02_0020;PFB0100c
PF3D7_1408700		conserved Plasmodium protein, unknown function	No	0.474695	-0.173112	-0.209551	0.017655	-0.04031	-0.118969	-0.446779	-0.756155	-0.28146	0.365501	0.192389	-0.323839	-0.53339	-0.252625	-0.23497	-0.32506	-0.36537	-0.45648	-0.575449	-0.0793705	-0.52615	PF3D7_1408700	5525	S	___1	GYQS(1)KNEQNETK	4	EEMIINPDLLMKGYQSKNEQNETKTNIVKEN	PF14_0084
PF3D7_1201000		Plasmodium exported protein (PHISTb), unknown function	Yes	0.474405	0.12456	0.27971	0.462235	0.33749	0.342241	0.15535	0.957085	1.43149	0.63319	0.75775	1.36578	1.64549	0.650755	1.11299	0.46991	0.8074	0.29208	0.634321	-0.36492	-0.20957	PF3D7_1201000	403	S	___1	AVPQNS(1)GS(1)NFDEFLDVK	6	KVSNIKNNLRAVPQNSGSNFDEFLDVKEANE	2277.t00010;MAL12P1.10;PFL0050c
PF3D7_1149000	Pf332	antigen 332, DBL-like protein	Yes	0.474025	0.486369	0.3668	0.745716	0.205867	0.34572	0.082291	0.158335	0.63236	0.998541	1.48491	0.99131	1.35811	-0.285295	0.460421	0.563311	0.769178	1.04412	1.38984	0.6509	0.733191	PF3D7_1149000	2618	S	___1	KS(0.999)VT(0.001)KEIVDEVSR	2	QEDVSVNAQVTYEKKSVTKEIVDEVSRTEEI	PF11_0506;PF11_0507
PF3D7_0202000	KAHRP	knob-associated histidine-rich protein	Yes	0.47207	0.15989	0.39722	0.31453	0.28913	0.29943	0.03887	5.18197	5.65404	5.56024	5.72013	5.5743	5.97152	5.59974	5.91427	5.55075	5.83988	5.4778	5.77723	4.95841	4.99728	PF3D7_0202000	600	T	___3	GAS(0.001)T(0.02)T(0.974)AGS(0.005)TTGATTGANAVQSK	5	KEASTTEGATKGASTTAGSTTGATTGANAVQ	PF02_0020;PFB0100c
PF3D7_1438400	MCA2	metacaspase-like protein	No	0.471965	0.256329	0.05311	0.513888	0.121779	0.3049	0.0999203	0.524115	0.99608	0.26202	0.518349	0.13332	0.18643	0.0642643	0.578152	0.17156	0.293339	-0.598059	-0.293159	-0.0461102	0.0538101	PF3D7_1438400	559	S	___1	SFS(0.652)S(0.348)FDVK	3	TNYMNKDSTKNVRSFSSFDVKERISPRVIRN	PF14_0362;PF14_0363
PF3D7_0918900	gammaGCS	gamma-glutamylcysteine synthetase	No	0.471675	0.419397	0.217241	0.425665	0.632241	0.688231	0.62886	0.617615	1.08929	0.394451	0.813848	0.2507	0.467941	0.407696	0.833361	0.339359	0.9716	-0.37501	0.313221	0.11685	0.74571	PF3D7_0918900	309	T	___1	NKEKDNT(1)PR	7	VYDDEIENKNKEKDNTPRSCNDYNNVNDSSN	PFI0925w
PF3D7_0702500		Plasmodium exported protein, unknown function	Yes	0.471261	0.33083	0.64846	0.600671	0.750429	0.146311	0.03901	-1.0759	-0.604639	-0.91568	-0.58485	-1.05562	-0.40716	-1.03182	-0.431149	-1.56418	-0.813751	-1.04455	-0.898239	-1.42868	-1.38967	PF3D7_0702500	211	S	___3	HYS(1)LGGQPSSSGR	3	STGTTSQGSTSSRHYSLGGQPSSSGRSFSGS	PF07_0008
PF3D7_1241900		tetratricopeptide repeat protein, putative	No	0.46997	-0.22962	-0.10119	-0.00159	0.01166	-0.27348	-0.07326	2.05115	2.52112	2.41666	2.18704	2.29414	2.19295	2.27062	2.26903	2.20302	2.21468	2.41983	2.14635	2.46448	2.39122	PF3D7_1241900	188	S	___1	TENSLLENNS(0.965)NENKS(0.976)ET(0.059)DNENSDK	15	KTENSLLENNSNENKSETDNENSDKKINNKM	2277.t00403;MAL12P1.401;PFL2015w
PF3D7_0919800		TLD domain-containing protein	No	0.46979	0.17634	0.46733	-0.1941	-0.60114	0.58681	0.44343	-5.13393	-4.66414	-4.53097	-4.35463	-4.29432	-3.82699	-3.88877	-4.08287	-3.39224	-3.99338	-3.93837	-3.35156	-3.92255	-3.47912	PF3D7_0919800	213	S	___1	S(0.106)LS(0.894)YVFNLAQPLVTTNTTFK	3	KQKSISYYKYISKSLSYVFNLAQPLVTTNTT	PFI0970c
PF3D7_0113200		Plasmodium exported protein, unknown function	Yes	0.46966	0.33852	0.78684	0.60868	0.34424	0.44592	0.19614	3.71433	4.18399	3.41196	3.75048	0.2766	1.06344	3.37057	3.97925	3.15274	3.49698	3.27173	3.71765	3.11021	3.30635	PF3D7_0113200	156	S	___1	REIS(1)LTVK	4	INKTQTNESNNKREISLTVKNQKNQTNKSKN	MAL1P3.08;PFA0630c
PF3D7_0401800	PfD80	Plasmodium exported protein (PHISTb), unknown function	Yes	0.469591	0.64841	0.25021	0.43927	0.99615	1.19303	0.77971	-1.28212	-0.812529	-1.91192	-1.26351	-1.61102	-1.36081	-1.94983	-1.51056	-2.19392	-1.19777	-2.0337	-0.84067	-2.35243	-1.57272	PF3D7_0401800	316	S	___2	EGS(0.038)NVDIT(0.963)EEEEKEAES(0.999)VDDNNK	17	GSNVDITEEEEKEAESVDDNNKEGNESDNIY	MAL4P1.16;PFD0080c
PF3D7_0405400	PRPF8	pre-mRNA-processing-splicing factor 8, putative	No	0.468697	0.317358	-0.14555	0.178616	0.118959	0.244599	0.060572	0.316084	0.784781	0.662811	0.980169	1.03105	0.8855	0.649694	0.82831	0.800011	0.91897	0.984421	1.22902	0.765339	0.825911	PF3D7_0405400	851	S	___3	DETYEIDS(0.991)T(0.009)VENDS(1)HDGSLK	8	SSRTSKNKDETYEIDSTVENDSHDGSLKKEK	MAL4P1.52;PFD0260w;PFD0265w
PF3D7_0317300		conserved Plasmodium protein, unknown function	No	0.46856	0.00766	-0.16322	0.09363	0.48398	0.21725	-0.07039	-1.69801	-1.22945	-1.3964	-1.38874	-1.37526	-1.53848	-1.50311	-1.40948	-1.76007	-1.27609	-1.61336	-1.39611	-1.41098	-1.48137	PF3D7_0317300	2186	T	___1	YINENIDLT(0.5)S(0.5)ELEK	9	LSQEIYKYINENIDLTSELEKKNDMLENYKN	MAL3P6.11;PFC0760c
PF3D7_0708400	HSP90	heat shock protein 90	No	0.468461	0.288239	0.367151	0.27284	0.21774	0.37366	0.09634	-1.26752	-0.799059	-1.10528	-0.817041	-1.19853	-0.831379	-1.31123	-1.03839	-1.5736	-1.35586	-1.48263	-1.10897	-1.52123	-1.42489	PF3D7_0708400	737	T	___1	LGLSIDEEENNDIDLPPLEET(0.004)VDAT(0.941)DS(0.055)K	25	NNDIDLPPLEETVDATDSKMEEVD_______	PF07_0029
PF3D7_1149000	Pf332	antigen 332, DBL-like protein	Yes	0.46841	0.2588	0.34922	0.23756	-0.166331	0.2156	0.36222	2.38333	2.85174	2.02821	2.28701	1.95178	2.301	2.11304	2.3506	1.04819	0.881859	2.16137	2.37697	1.8609	2.22312	PF3D7_1149000	1149	S	___2	VVKEEGS(1)AS(1)EK	7	KEEGSASEKVVKEEGSASEKIVEEEGSVTEE	PF11_0506;PF11_0507
PF3D7_1149000	Pf332	antigen 332, DBL-like protein	Yes	0.46841	0.2588	0.34922	0.23756	-0.166331	0.2156	0.36222	2.38333	2.85174	2.02821	2.28701	1.95178	2.301	2.11304	2.3506	1.04819	0.881859	2.16137	2.37697	1.8609	2.22312	PF3D7_1149000	1151	S	___2	VVKEEGS(1)AS(1)EK	9	EGSASEKVVKEEGSASEKIVEEEGSVTEETA	PF11_0506;PF11_0507
PF3D7_0915400	PFK9	ATP-dependent 6-phosphofructokinase	No	0.46777	-0.46341	-0.48737	0.031	0.68766	0.96812	-0.01164	-4.52353	-4.05576	-3.64511	-4.10852	-3.73828	-4.22565	-3.96247	-3.93147	-4.75768	-4.07002	-4.92411	-3.95599	-3.56854	-3.58018	PF3D7_0915400	1199	S	___1	Y(0.003)S(0.534)GS(0.463)FMGLTHFFGYQGR	2	MVKEELQDRKQKGKYSGSFMGLTHFFGYQGR	PFI0755c
PF3D7_0320600		conserved Plasmodium protein, unknown function	No	0.46774	0.01082	0.34278	-0.47607	-0.063	0.00093	-0.43475	-2.80859	-2.34085	-2.76284	-2.75202	-2.90569	-2.56291	-2.95446	-3.43053	-3.34697	-3.40997	-2.49239	-2.49146	-2.81476	-3.24951	PF3D7_0320600	7	S	___2	MNFDIAS(1)DGNEYTYSGYSK	7	_________MNFDIASDGNEYTYSGYSKNSL	PFC0911c
PF3D7_0320600		conserved Plasmodium protein, unknown function	No	0.46774	0.01082	0.34278	-0.47607	-0.063	0.00093	-0.43475	-2.80859	-2.34085	-2.76284	-2.75202	-2.90569	-2.56291	-2.95446	-3.43053	-3.34697	-3.40997	-2.49239	-2.49146	-2.81476	-3.24951	PF3D7_0320600	15	S	___2	MNFDIAS(0.814)DGNEY(0.166)T(0.034)Y(0.006)S(0.968)GY(0.001)S(0.012)K	15	_MNFDIASDGNEYTYSGYSKNSLIEDKNYIL	PFC0911c
PF3D7_1441200		60S ribosomal protein L1, putative	No	0.467691	0.15853	0.46209	0.226611	0.229759	0.27737	0.357811	-1.18279	-0.715099	-0.99482	-0.83629	-1.30161	-0.83952	-1.06972	-0.843109	-1.1068	-0.877041	-1.34118	-1.06381	-1.30744	-0.949629	PF3D7_1441200;P62906	49;50	S	___1	RFS(0.999)GT(0.001)VR	3	QIGLKDYDTQRDKRFSGTVRLSNEVRKKLKV	PF14_0391
PF3D7_0422700	EIF4A3	eukaryotic initiation factor 4A-III, putative	No	0.46743	-0.24392	0.12298	-0.17431	0.02815	-0.4412	0.01972	-2.74901	-2.28158	-2.07278	-2.3167	-1.92209	-1.79911	-1.86022	-2.03453	-2.16462	-2.13647	-1.56108	-2.00228	-1.95904	-1.93932	PF3D7_0422700	18	S	___1	YEICT(0.013)S(0.987)FENIGIDEGLLR	6	KDDHYKTSEKYEICTSFENIGIDEGLLRGIY	MAL4P1.208;PFD1070w
PF3D7_0204700	HT1	hexose transporter	No	0.4671	0.08745	0.0651	-0.06403	0.28072	0.27418	0.56961	-2.74743	-2.28033	-2.79708	-2.70963	-2.40173	-2.33663	-2.22703	-2.29106	-2.76362	-2.4829	-2.56201	-2.28783	-2.82717	-2.25756	PF3D7_0204700	279	S	___1	NS(0.847)LS(0.152)LLS(0.001)ALK	2	AIKEAVEQNESAKKNSLSLLSALKIPSYRYV	PF02_0044;PFB0210c
PF3D7_0723800		conserved Plasmodium protein, unknown function	No	0.46685	-0.42165	-0.36165	0.44317	0.0423	-0.62946	-0.56743	-3.82423	-3.35738	-2.93776	-3.35941	-3.51017	-3.87182	-4.24992	-3.80675	-3.92772	-3.88542	-3.86585	-4.49531	-4.0065	-4.57393	PF3D7_0723800	167	S	___1	FS(0.071)NLS(0.929)LLNDDFFLK	5	ENINKKEKLPRFSNLSLLNDDFFLKSQNLDM	PF07_0101
PF3D7_1343400	RAD5	DNA repair protein RAD5, putative	No	0.46664	-0.11631	0.50419	-0.0581	0.38152	0.53442	-0.39836	-2.07623	-1.60959	-1.85078	-1.96709	-2.23715	-1.73296	-1.94285	-2.00095	-2.19766	-1.81614	-2.4181	-1.88368	-1.88601	-2.28437	PF3D7_1343400	496	S	___1	QKS(1)NINEIIIDDVIK	3	RENPPEYTKKLERQKSNINEIIIDDVIKIPT	MAL13P1.216
PF3D7_0401800	PfD80	Plasmodium exported protein (PHISTb), unknown function	Yes	0.46623	0.04611	0.56435	0.51531	0.39744	0.28358	0.13876	2.15971	2.62594	2.10572	2.15183	2.6691	3.23345	2.07854	2.59385	1.78575	2.18319	2.033	2.31658	1.46837	1.60713	PF3D7_0401800	165	S	___1	SASTAS(0.986)T(0.014)AR	6	RSASAASTTRSASTASTARSASTASTASAAS	MAL4P1.16;PFD0080c
PF3D7_0424600		Plasmodium exported protein (PHISTb), unknown function	Yes	0.466127	0.179767	0.595912	0.471726	0.435639	0.336769	0.077501	-0.509756	-0.0436287	-0.208639	-0.0288715	-0.236691	0.359221	-0.237505	0.234221	-0.71637	-0.280731	-0.0238895	0.31288	-0.25654	-0.179039	PF3D7_0424600	157	S	___1	YNS(0.013)NY(0.01)S(0.927)PIPY(0.049)PEQY(0.001)NPVDYNK	6	KLIDDINKFRYNSNYSPIPYPEQYNPVDYNK	MAL4P1.229;PFD1170c
PF3D7_1447800		calponin homology domain-containing protein, putative	No	0.466097	0.130657	0.02257	0.373426	0.51288	0.28089	0.00564	-0.561476	-0.0953789	0.217121	0.347778	-0.19628	-0.17371	-0.183235	0.190191	-0.41238	0.1005	-0.555609	-0.274719	-0.1124	-0.10676	PF3D7_1447800	412	S	___2	FS(0.272)S(0.728)NIS(1)CYDDNKLYNK	3	FSDNILSEVTWNRFSSNISCYDDNKLYNKGL	PF14_0454
PF3D7_1447800		calponin homology domain-containing protein, putative	No	0.466097	0.130657	0.02257	0.373426	0.51288	0.28089	0.00564	-0.561476	-0.0953789	0.217121	0.347778	-0.19628	-0.17371	-0.183235	0.190191	-0.41238	0.1005	-0.555609	-0.274719	-0.1124	-0.10676	PF3D7_1447800	415	S	___2	FS(0.272)S(0.728)NIS(1)CYDDNKLYNK	6	NILSEVTWNRFSSNISCYDDNKLYNKGLHNN	PF14_0454
PF3D7_1344800	ATCase	aspartate carbamoyltransferase	No	0.465586	0.366719	0.1367	0.303347	0.373989	0.27603	0.288441	-0.126326	0.33926	0.0112114	0.37793	0.236721	0.373421	0.258104	0.561451	0.11034	0.484329	0.012701	0.288731	0.15333	0.441771	PF3D7_1344800	113	S	___1	T(0.001)RCS(0.999)FDAAILK	4	VFCSVFLEPSTRTRCSFDAAILKLGSKVLNI	MAL13P1.221;PF13_0240
PF3D7_0521000		conserved Plasmodium protein, unknown function	No	0.465517	-0.19514	-0.05453	-0.259313	0.210739	0.233991	0.061731	-0.161196	0.304321	-0.38452	-0.57966	-0.69482	-0.74935	-0.400385	-0.659698	-0.37808	-0.167341	-1.03074	-0.796749	-0.372921	-0.31119	PF3D7_0521000	367	S	___1	HYS(0.012)S(0.988)DVS(1)LNDEDLKYK	4	KTYRKDTNYKRRHYSSDVSLNDEDLKYKDRK	MAL5P1.211;PFE1055c
PF3D7_0627800	ACS	acetyl-CoA synthetase, putative	No	0.46522	0.27813	-0.4064	-1.07349	0.869868	-0.26301	0.83922	-1.59063	-1.12541	-1.43052	-1.15239	-1.63625	-2.04265	-1.62103	-2.69452	-1.8208	-0.950932	-1.90065	-2.16366	-1.99052	-1.1513	PF3D7_0627800	424	S	___1	NDHS(1)DDNNKNK	4	SYFNQQNNTYNKNDHSDDNNKNKGKTTLHKK	2270.t00165;MAL6P1.150;PFF1350c
PF3D7_0905100	NUP221	nucleoporin NUP100/NSP100, putative	No	0.46419	-0.02699	-0.59384	-0.01078	-0.13017	-0.08535	-0.2464	-2.84576	-2.38157	-2.34018	-2.36717	-2.21329	-2.80713	-2.56145	-2.57223	-2.28224	-2.41241	-2.49569	-2.58104	-2.268	-2.5144	PF3D7_0905100	1599	S	___1	FIDNFDIIDTDVLYCDEENVS(1)HINDTK	21	DIIDTDVLYCDEENVSHINDTKCRRERINKR	PFI0250c
PF3D7_1408200	ApiAP2	AP2 domain transcription factor AP2-G2, putative	No	0.46211	0.32951	0.23846	0.35832	0.30816	0.2411	0.14913	2.54679	3.0089	2.29728	2.62679	2.46493	2.70339	2.52341	2.88173	2.50786	2.81602	2.38765	2.62875	2.51853	2.66766	PF3D7_1408200	45	S	___1	NLCENNS(1)DIVEK	7	DIESNDDKKNLCENNSDIVEKMKGNYEYKDD	PF14_0079
PF3D7_1420700	P113	surface protein P113	No	0.461925	0.458599	0.69105	0.157097	0.261961	0.21571	-0.40241	-0.753395	-0.29147	-1.00754	-0.548941	-1.55169	-0.86064	-0.587835	-0.430738	-0.904381	-0.64242	-0.988859	-0.773149	-1.93647	-2.33888	PF3D7_1420700	91	T	___1	KT(1)QSFR	2	NNKCIYFFEYELRKKTQSFRNKNSIEISECV	PF14_0201;Pf113
PF3D7_1149000	Pf332	antigen 332, DBL-like protein	Yes	0.461466	0.583847	0.74431	0.505236	0.346819	0.676818	0.62267	-0.247175	0.214291	-0.775719	-0.191872	-0.408739	0.335571	-0.526606	-0.0213699	-0.44842	-0.101601	-0.734119	-0.0573006	-1.04721	-0.42454	PF3D7_1149000	434	S	___1	IKPTYEENDEDKS(1)K	13	NSKIKPTYEENDEDKSKISIETSEIDRDKEP	PF11_0506;PF11_0507
PF3D7_0202000	KAHRP	knob-associated histidine-rich protein	Yes	0.46144	0.24242	-0.02305	-0.25167	0.87487	0.20074	0.69224	1.97216	2.4336	1.85784	2.10026	1.50686	1.48381	1.83866	1.58699	1.5694	2.44427	1.17013	1.37087	1.47455	2.16679	PF3D7_0202000	472	S	___1	S(0.003)DGS(0.997)KAHEK	4	ENKNKEKTNNSKSDGSKAHEKKENETKNTAG	PF02_0020;PFB0100c
PF3D7_1329500		conserved Plasmodium protein, unknown function	No	0.46132	0.01615	0.07903	0.09969	0.16192	0.08805	-0.00706	-1.66599	-1.20467	-1.76658	-1.75043	-1.85974	-1.78071	-1.7213	-1.62161	-1.74633	-1.58441	-2.00809	-1.92004	-1.81482	-1.82188	PF3D7_1329500	628	S	___1	YNS(0.132)S(0.132)S(0.729)FIS(0.008)NFNDDGMSTK	5	KLRGYHNNNYRYNSSSFISNFNDDGMSTKFP	PF13_0162
PF3D7_0615000		conserved Plasmodium protein, unknown function	No	0.46105	0.18678	0.41003	0.17981	0.13964	0.1256	-0.18089	-2.32484	-1.86379	-2.00111	-1.81433	-1.96896	-1.55893	-1.87852	-1.69871	-1.96221	-1.82257	-1.84175	-1.71615	-1.80547	-1.98636	PF3D7_0615000	93	S	___1	IIS(0.5)S(0.5)DNELGEENEEEENVIICTDSILK	3	YANLIKNKKSDSKIISSDNELGEENEEEENV	2270.t00040;MAL6P1.276;PFF0725w
PF3D7_1149000	Pf332	antigen 332, DBL-like protein	Yes	0.46043	0.3821	0.48061	0.17442	0.48152	0.48198	0.26739	2.51548	2.97591	1.73389	2.11599	1.86768	2.34829	2.2034	2.37782	1.78173	2.26325	1.54888	2.03086	1.64277	1.91016	PF3D7_1149000	1530	S	___1	EGS(1)VTEQLVEEEK	3	EEDSVKDQNVFEKEGSVTEQLVEEEKGLINE	PF11_0506;PF11_0507
PF3D7_0730800		Plasmodium exported protein, unknown function, unspecified product	Yes	0.459726	0.291158	0.25769	0.483596	0.617359	0.416921	0.393652	0.0688248	0.528551	0.62871	0.919868	0.27236	0.53005	0.609394	1.09299	0.17803	0.795389	-1.23595	-0.819029	0.368479	0.762131	PF3D7_0730800;PF3D7_0730800	124;124	S	___1	YVNEDGTTKPNAPTAQS(0.999)LTSIVK	17	VNEDGTTKPNAPTAQSLTSIVKGVMHDIKPQ	MAL7P1.170;PF3D7_0730800.1;PF3D7_0730800.2
PF3D7_1139300	ApiAP2	AP2 domain transcription factor, putative	No	0.459576	0.454778	0.444771	0.511934	0.105179	0.29609	0.230391	0.446615	0.906191	0.17487	0.629648	0.20084	0.645611	0.386166	0.8981	0.33383	0.439009	0.226461	0.522551	0.224239	0.45463	PF3D7_1139300	1587	T	___1	RT(0.669)T(0.331)EDIYK	2	SQYLSLPSKKKKKKRTTEDIYKSEIDVLSYQ	PF11_0404
PF3D7_1149000	Pf332	antigen 332, DBL-like protein	Yes	0.45947	0.34834	0.31418	0.37532	0.53529	0.55727	0.25736	3.66635	4.12582	3.33857	3.68691	3.32223	3.63641	3.43233	3.80765	3.24586	3.78115	2.95634	3.51361	3.43895	3.69631	PF3D7_1149000	5116	S	___1	EGS(1)FNEEIDIRELGDDGVEEREK	3	QTDSVIEEVVEQKEGSFNEEIDIRELGDDGV	PF11_0506;PF11_0507
PF3D7_1347200	NT1	nucleoside transporter 1	No	0.45911	-0.24308	-0.28655	0.25664	0.21745	-0.07411	-0.40692	2.30301	2.76212	3.50853	3.26545	2.70334	2.41679	2.85876	3.1154	2.9056	3.12305	2.72329	2.64918	3.16696	2.76004	PF3D7_1347200	3	T	___2	S(0.999)T(0.999)GKES(0.874)S(0.128)KAYADIESR	2	_____________MSTGKESSKAYADIESRG	PF13_0252
PF3D7_0401800	PfD80	Plasmodium exported protein (PHISTb), unknown function	Yes	0.45907	0.13334	0.38678	0.38657	0.41665	0.27555	0.20524	1.83675	2.29582	1.97399	2.10733	2.54161	2.92839	1.71766	2.10423	1.55858	1.97523	1.69108	1.96663	1.07123	1.27647	PF3D7_0401800	139	T	___1	SASAAS(0.999)T(0.998)T(0.003)R	7	TASAASTTRSASAASTTRSASAASTTRSASA	MAL4P1.16;PFD0080c
PF3D7_1242700		40S ribosomal protein S17, putative	No	0.45898	-0.07227	0.186631	0.29474	0.02529	0.0329	0.04804	-1.9957	-1.53672	-1.07266	-1.14493	-1.09236	-0.905729	-1.32778	-1.03304	-1.2475	-1.22221	-1.07533	-1.04243	-1.19748	-1.14944	PF3D7_1242700	94	S	___1	SQIDVS(1)VIYVEPDTLR	6	ERRLDFVPEKSQIDVSVIYVEPDTLRMIKSL	2277.t00411;MAL12P1.409;PFL2055w
PF3D7_1359400	CELF1	CUGBP Elav-like family member 1	No	0.458376	-0.51832	-0.49411	-0.245624	0.31279	0.12697	-0.63509	0.469755	0.928131	1.52495	1.00663	0.318611	-0.175499	0.738235	0.492611	0.79929	1.11208	-0.216339	-0.0893688	1.24337	0.60828	PF3D7_1359400	49	S	___1	EDIEGDENLKS(1)S(1)KGK	12	DYSKEDIEGDENLKSSKGKQENNTKSSSDKD	PF13_0315
PF3D7_1316900		conserved Plasmodium protein, unknown function	No	0.45821	-0.22301	-0.27507	0.45186	0.09201	-0.11377	0.12289	-3.87024	-3.41203	-3.27845	-3.50146	-3.21558	-3.49065	-3.7818	-3.32994	-3.57874	-3.48673	-3.42096	-3.53473	-3.78379	-3.6609	PF3D7_1316900	389	S	___1	NSYHHHYNNNS(1)NNNK	11	DKYYKNSYHHHYNNNSNNNKYYYDEKEYENY	MAL13P1.88;PF13_0094
PF3D7_0729100		conserved Plasmodium protein, unknown function	No	0.45816	0.1158	0.1576	0.3948	0.20254	0.31451	0.045	2.6016	3.05976	2.67086	2.78666	2.48603	2.64363	2.49834	2.89314	2.40877	2.61131	2.16305	2.47756	2.40511	2.45011	PF3D7_0729100	1581	S	___1	GVLYDSLS(0.997)DS(0.003)YNYR	8	KIQNSKEKGVLYDSLSDSYNYRRKENNMRRG	PF07_0120
PF3D7_0723400		conserved Plasmodium protein, unknown function	No	0.45811	0.63159	0.16697	0.57333	0.1864	0.48713	0.29237	-2.66264	-2.20453	-2.80013	-2.16854	-2.34489	-2.17792	-2.5997	-2.02637	-2.71118	-2.52478	-2.75696	-2.26983	-2.75134	-2.45897	PF3D7_0723400	362	S	___2	QAQNEYDGDYIS(0.997)ES(0.003)YQYNNK	12	QKERQAQNEYDGDYISESYQYNNKYDYKKKG	PF07_0097
PF3D7_0723400		conserved Plasmodium protein, unknown function	No	0.45811	0.63159	0.16697	0.57333	0.1864	0.48713	0.29237	-2.66264	-2.20453	-2.80013	-2.16854	-2.34489	-2.17792	-2.5997	-2.02637	-2.71118	-2.52478	-2.75696	-2.26983	-2.75134	-2.45897	PF3D7_0723400	364	S	___2	QAQNEYDGDY(0.133)IS(0.645)ES(0.645)Y(0.576)QY(0.001)NNK	14	ERQAQNEYDGDYISESYQYNNKYDYKKKGYE	PF07_0097
PF3D7_0821300	DHX36	ATP-dependent RNA helicase DHX36, putative	No	0.456406	0.006998	0.03842	-0.035464	0.12714	-0.129621	-0.285088	0.110464	0.56687	0.701981	0.708979	0.48394	0.52236	0.550215	0.514751	0.4977	0.62484	0.602041	0.47242	0.713629	0.428541	PF3D7_0821300	644	S	___1	NS(0.966)VEDS(0.034)KENINK	2	KKKNNNEQKKIVQKNSVEDSKENINKLENYD	PF08_0042
PF3D7_1033100	AdoMetDC/ODC	S-adenosylmethionine decarboxylase/ornithine decarboxylase	No	0.455866	0.241249	0.141869	0.059746	0.092261	0.13835	0.07102	-0.894976	-0.43911	-0.84296	-0.601711	-0.834839	-0.69297	-0.712496	-0.65275	-0.838011	-0.74575	-0.830849	-0.692499	-0.70112	-0.6301	PF3D7_1033100	273	S	___1	LYDSSDADKEVT(0.157)T(0.157)HIYS(0.567)T(0.118)R	17	YDSSDADKEVTTHIYSTRGTYEDTGMVNCVD	PF10_0322
PF3D7_0108700	PSOP24	secreted ookinete protein, putative	No	0.45582	0.597368	0.06801	0.476841	0.088139	0.213159	0.123431	-2.12667	-1.67085	-1.48884	-0.891472	-0.897249	-0.829239	-1.08499	-0.608149	-1.03419	-0.946051	-0.463739	-0.25058	-0.55164	-0.428209	PF3D7_0108700	1113	S	___1	AGDPFLHNQEGS(0.961)FS(0.039)YAPPPYQGVENSSNK	12	NISKAGDPFLHNQEGSFSYAPPPYQGVENSS	MAL1P2.15;PFA0430c
PF3D7_0601900		conserved Plasmodium protein, unknown function	Yes	0.455805	0.27804	0.10358	0.184725	0.118799	0.05269	-0.27587	-0.859665	-0.40386	-1.70327	-1.42523	-1.0086	-0.90502	-0.884245	-0.69952	-0.32679	-0.207991	-0.6077	-0.55501	-2.96856	-3.24443	PF3D7_0601900	113	S	___2	S(0.843)HS(0.145)S(0.189)S(0.415)S(0.204)S(0.204)VYASANAEN	1	PNERKTSSSSRQAARSHSSSSSVYASANAEN	2270.t00296;MAL6P1.22;PFF0090w
PF3D7_0321900	CARL	cyclic amine resistance locus protein	No	0.45578	-0.15291	0.50261	-0.27153	0.22327	0.2577	0.13034	-3.02307	-2.56729	-2.79895	-2.95186	-3.22596	-2.72335	-2.59307	-2.8646	-2.96385	-2.74058	-2.83248	-2.57478	-2.54482	-2.41448	PF3D7_0321900	511	S	___1	LNS(1)VHFEDNEEHISSNLFIK	3	LKIDYEQGGEIHRLNSVHFEDNEEHISSNLF	MAL3P7.23;PFC0970w
PF3D7_1101700	MC-2TM	Pfmc-2TM Maurer's cleft two transmembrane protein	Yes	0.45568	0.61945	-0.01588	-0.45989	-0.16395	-2.12016	0.08824	-5.81116	-5.35548	-4.69962	-4.08017	-5.09718	-5.11306	-3.65674	-4.11663	-4.8469	-5.01085	-5.7737	-7.89386	-2.90422	-2.81598	PF3D7_1101700;PF3D7_1039700;PF3D7_0222100;PF3D7_0631400	77;77;77;77	S	___2	NLDPQIS(0.91)S(0.088)LVS(0.002)LVDNMDITQEK	7	ILFKDKKKKNLDPQISSLVSLVDNMDITQEK	PF11_0025
PF3D7_1033200	ETRAMP10.2	early transcribed membrane protein 10.2	Yes	0.45527	0.30725	0.09363	0.74111	0.4196	0.6144	0.20698	4.10871	4.56398	3.79759	4.10484	3.15042	3.24405	3.91772	4.65883	3.53521	3.95481	3.16977	3.78417	3.39901	3.60599	PF3D7_1033200	329	S	___1	S(1)KGPSSPLR	1	SSGSSNRSSSGTSTRSKGPSSPLRDSSGRSS	PF10_0323
PF3D7_1145100	SEC21	coatomer subunit gamma, putative	No	0.455181	0.32147	0.48077	1.03335	-0.06236	0.17253	0.06826	-1.22446	-0.769279	-1.67568	-1.35421	-1.69394	-1.21317	-1.79945	-0.7661	-1.56812	-1.63048	-1.51248	-1.33995	-1.75883	-1.69057	PF3D7_1145100	744	S	___1	DYVS(0.541)S(0.459)PFINKK	4	EQIIASNDLNNKDYVSSPFINKKNKTSYNEI	PF11_0463
PF3D7_1353100		Plasmodium exported protein, unknown function	Yes	0.45512	0.18613	0.22878	0.31121	0.22664	0.39448	-6e-05	2.19178	2.6469	1.91716	2.10329	2.06268	2.29146	2.21338	2.52459	2.17109	2.39773	1.2824	1.67688	1.66818	1.66812	PF3D7_1353100	111	T	___1	T(0.742)S(0.258)YTEVK	1	ETEDVNHKAHHTGERTSYTEVKHRRSSSNSH	PF13_0275
PF3D7_0110700	CAF1C	chromatin assembly factor 1 protein WD40 domain, putative	No	0.45458	0.38095	0.32923	0.12941	0.41093	-0.11138	0.16431	-2.85813	-2.40355	-2.6582	-2.27725	-2.81044	-2.48121	-2.56878	-2.43937	-2.79587	-2.38494	-2.66573	-2.77711	-2.67712	-2.51281	PF3D7_0110700	45	T	___1	IDEDEEEDVET(1)QFNNWK	11	VSHEKIDEDEEEDVETQFNNWKTNSGLLYDF	MAL1P2.33;PFA0520c
PF3D7_1203400	MFS4	major facilitator superfamily domain-containing protein, putative	No	0.45433	-0.00859	0.26514	0.12192	0.06711	0.01381	-0.20699	-2.52207	-2.06774	-2.01762	-2.02621	-2.12342	-1.85828	-1.9664	-1.84448	-2.14026	-2.07315	-2.03924	-2.02543	-1.93287	-2.13986	PF3D7_1203400	1248	S	___1	VSPLFTSLTFPCEIS(0.937)HT(0.063)	15	KVSPLFTSLTFPCEISHT_____________	2277.t00034;MAL12P1.34;PFL0170w
PF3D7_0529800		conserved Plasmodium protein, unknown function	No	0.453435	0.18265	0.3272	0.507204	0.31043	0.418459	0.17914	0.786385	1.23982	0.94396	1.12661	0.68849	1.01569	0.653706	1.16091	0.75588	1.06631	0.749901	1.16836	0.734409	0.913549	PF3D7_0529800	1065	S	___1	KYNS(1)YEK	4	AAYNNFHLEAQKKYNSYEKVIDNLKKEIDEL	MAL5P1.294;PFE1485w
PF3D7_0929000	TAF7	transcription initiation factor TFIID subunit 7, putative	No	0.45262	-0.14321	0.49576	-0.23027	0.3982	0.12576	-0.9548	-4.37064	-3.91802	-4.15675	-4.29996	-5.06062	-4.56486	-4.55305	-4.78332	-4.32305	-3.92485	-4.43238	-4.30662	-4.39497	-5.34977	PF3D7_0929000	381	S	___2	ENY(0.068)ES(0.942)DVS(0.988)DLLLGGT(0.001)YYLQK	5	FEALLNYDIEKENYESDVSDLLLGGTYYLQK	PFI1425w
PF3D7_0929000	TAF7	transcription initiation factor TFIID subunit 7, putative	No	0.45262	-0.14321	0.49576	-0.23027	0.3982	0.12576	-0.9548	-4.37064	-3.91802	-4.15675	-4.29996	-5.06062	-4.56486	-4.55305	-4.78332	-4.32305	-3.92485	-4.43238	-4.30662	-4.39497	-5.34977	PF3D7_0929000	384	S	___2	ENY(0.068)ES(0.942)DVS(0.988)DLLLGGT(0.001)YYLQK	8	LLNYDIEKENYESDVSDLLLGGTYYLQKK__	PFI1425w
PF3D7_0807200		conserved Plasmodium membrane protein, unknown function	No	0.452326	0.442907	0.142899	0.510266	0.073031	0.10447	0.192101	0.443874	0.8962	0.374611	0.817518	0.867861	1.01076	0.677654	1.18792	0.800949	0.87398	1.06881	1.17328	0.858969	1.05107	PF3D7_0807200	17	S	___1	LSS(1)LITQNIK	3	KTMSMIHEVGLNKLSSLITQNIKQKIIKRKD	MAL8P1.130
PF3D7_1139300	ApiAP2	AP2 domain transcription factor, putative	No	0.452217	0.247748	0.414989	0.108397	0.243469	0.142721	0.052181	-0.553766	-0.101549	-0.895039	-0.647291	-0.909399	-0.49441	-0.622456	-0.514059	-0.77433	-0.530861	-1.02178	-0.879059	-0.879131	-0.82695	PF3D7_1139300	2448	S	___1	LS(0.001)IES(0.999)IEQIK	5	VIRRGVKEAYKLSIESIEQIKRQTQTNNFNN	PF11_0404
PF3D7_1139300	ApiAP2	AP2 domain transcription factor, putative	No	0.45193	-0.04653	0.11005	0.25461	0.34512	0.08076	0.15165	-2.14354	-1.69161	-1.82688	-1.87341	-2.09347	-1.98342	-1.82703	-1.57242	-2.03775	-1.69263	-2.11015	-2.02939	-1.95433	-1.80268	PF3D7_1139300	1780	S	___1	NDDDEDDGNNT(1)DNS(1)KILR	14	HKNDDDEDDGNNTDNSKILRSFDKCSNENSV	PF11_0404
PF3D7_1343700	Kelch13	kelch protein K13	No	0.45178	0.35864	-0.40913	0.14804	-0.53449	-0.28858	0.09434	-3.88958	-3.4378	-4.38152	-4.02288	-3.17467	-3.5838	-3.63533	-3.48729	-3.48949	-4.02398	-3.54486	-3.83344	-3.65506	-3.56072	PF3D7_1343700	86	S	___1	DSLLES(0.039)IDMS(0.039)VLDS(0.647)NFDS(0.276)K	14	VKDSLLESIDMSVLDSNFDSKKDFLPSNLSR	PF13_0238
PF3D7_1251200		coronin	No	0.45165	-0.15872	-0.28808	0.19318	-0.15421	-0.15241	0.06725	-2.70807	-2.25642	-1.50611	-1.66483	-1.17064	-1.45872	-1.19958	-1.0064	-1.16647	-1.32068	-0.751259	-0.903669	-1.12488	-1.05763	PF3D7_1251200	351	S	___2	KNS(0.999)S(0.999)IFQEDLY(0.001)PPIIMRDPER	3	NTDIRPISFYVPRKNSSIFQEDLYPPIIMRD	2277.t00492;MAL12P1.489;PFL2460w
PF3D7_1251200		coronin	No	0.45165	-0.15872	-0.28808	0.19318	-0.15421	-0.15241	0.06725	-2.70807	-2.25642	-1.50611	-1.66483	-1.17064	-1.45872	-1.19958	-1.0064	-1.16647	-1.32068	-0.751259	-0.903669	-1.12488	-1.05763	PF3D7_1251200	352	S	___2	KNS(0.999)S(0.999)IFQEDLY(0.001)PPIIMRDPER	4	TDIRPISFYVPRKNSSIFQEDLYPPIIMRDP	2277.t00492;MAL12P1.489;PFL2460w
PF3D7_1222000		tRNA-splicing ligase RtcB, putative	No	0.45133	0.27319	0.14307	0.45524	0.09899	0.20168	-0.200758	1.84334	2.29467	2.5391	2.81229	2.94355	3.08662	2.64268	3.09792	2.4478	2.54679	2.96168	3.16336	-0.0733109	-0.274069	PF3D7_1222000	462	T	___2	EY(0.018)MY(0.018)VT(0.963)RKGAT(0.514)S(0.427)S(0.059)K	11	NEIKKEYMYVTRKGATSSKKNQYGIIPGNMK	2277.t00212;MAL12P1.212;PFL1060c
PF3D7_0722500	CWC15	pre-mRNA-splicing factor CWC15, putative	No	0.450936	0.332259	0.3706	0.632515	0.246269	0.3796	0.244131	0.569994	1.02093	0.813131	1.14539	0.69623	1.06683	0.611525	1.24404	0.668329	0.914598	0.72954	1.10914	0.591669	0.8358	PF3D7_0722500	239	S	___2	NNVLTNNPLINLEDS(0.997)S(0.997)DNDEVS(0.005)T(0.001)K	15	KNNVLTNNPLINLEDSSDNDEVSTKKRKWTD	PF07_0091
PF3D7_0722500	CWC15	pre-mRNA-splicing factor CWC15, putative	No	0.450936	0.332259	0.3706	0.632515	0.246269	0.3796	0.244131	0.569994	1.02093	0.813131	1.14539	0.69623	1.06683	0.611525	1.24404	0.668329	0.914598	0.72954	1.10914	0.591669	0.8358	PF3D7_0722500	240	S	___2	NNVLTNNPLINLEDS(0.997)S(0.997)DNDEVS(0.005)T(0.001)K	16	NNVLTNNPLINLEDSSDNDEVSTKKRKWTDD	PF07_0091
PF3D7_1136600		conserved Plasmodium protein, unknown function	No	0.450895	-0.29145	-0.0705909	0.034046	0.179598	0.05447	-0.346319	-0.154215	0.29668	1.00741	0.71596	0.0395412	-0.0310497	0.363014	0.39706	0.454861	0.634459	-0.01231	0.04216	0.564659	0.21834	PF3D7_1136600	1104	T	___1	KEKENIDENIT(0.999)T(0.996)DY(0.005)ESSK	11	KKKRKKEKENIDENITTDYESSKNIREGKKI	PF11_0378
PF3D7_1008500		conserved Plasmodium membrane protein, unknown function	No	0.45082	-0.6393	0.01386	-0.23624	-0.1458	-0.16487	-0.60542	-2.94628	-2.49546	-1.08436	-1.72366	-2.10478	-2.09092	-1.67441	-1.91065	-1.84067	-1.98647	-1.71845	-1.88332	-1.39532	-2.00074	PF3D7_1008500	552	S	___1	NICALTNASLLKS(0.035)S(0.965)DNEK	14	IKNICALTNASLLKSSDNEKYEKVKSNINYE	2296.t00400;PF10_0082
PF3D7_1249300	PPM4	protein phosphatase PPM4, putative	No	0.45045	-0.09806	-0.18152	-0.02212	-0.25529	0.10559	0.59882	-3.37512	-2.92467	-3.04015	-3.13821	-3.29531	-3.47683	-3.21564	-3.23776	-3.05988	-3.31517	-3.70224	-3.59665	-3.45538	-2.85656	PF3D7_1249300	666	S	___1	KQS(0.014)NEES(0.969)FEEFS(0.017)MVLEDDLVGGTFSK	7	GPNSKTLNKKQSNEESFEEFSMVLEDDLVGG	2277.t00473;MAL12P1.471;PFL2365w
PF3D7_1126200	RPS18	40S ribosomal protein S18, putative	No	0.449957	0.001768	-0.110239	-0.076965	0.06007	0.223019	0.032201	-0.754826	-0.304869	-0.566509	-0.564741	-0.54184	-0.652079	-0.407965	-0.48493	-0.69659	-0.63652	-0.644459	-0.42144	-0.702871	-0.67067	PF3D7_1126200	2	S	___1	S(1)LQVIDNNDFQHILR	1	______________MSLQVIDNNDFQHILRI	PF11_0272
PF3D7_0624600	ISWI	SNF2 helicase, putative	No	0.4497	0.48109	-0.11798	-0.58369	-0.1808	-0.05705	0.05324	-3.37613	-2.92643	-2.99808	-2.51699	-2.02545	-2.14343	-2.151	-2.73469	-2.30377	-2.48457	-2.07018	-2.12723	-2.30119	-2.24795	PF3D7_0624600	2216	S	___1	DTHNANFIRDS(1)FNEDFLNK	11	EKLIKDTHNANFIRDSFNEDFLNKAKEFLRV	2270.t00132;MAL6P1.183;PFF1185w
PF3D7_1426000	RPL21	60S ribosomal protein L21	No	0.44952	-0.33167	-0.50721	-0.25828	-0.01263	0.06807	-0.05712	-3.84953	-3.40001	-2.28128	-2.61295	-2.62651	-3.13372	-2.64727	-2.90555	-2.97758	-2.99021	-2.71613	-2.64806	-2.8962	-2.95332	PF3D7_1426000	147	S	___1	VPPS(0.87)KIIT(0.13)IEPLPFYEEY	4	KTEGPKPAAMIKVPPSKIITIEPLPFYEEY_	PF14_0240
PF3D7_1142500	RPL28	60S ribosomal protein L28	No	0.44935	0.11235	-0.47406	1.6979	-1.21264	-2.11878	0.07997	-4.72509	-4.27574	-5.18206	-5.06971	-4.80826	-5.28232	-6.76649	-5.06859	-5.26704	-6.47968	-4.39951	-6.51829	-5.07367	-4.9937	PF3D7_1142500	2	S	___1	S(0.886)NVS(0.114)NALVWELTR	1	______________MSNVSNALVWELTRKSN	PF11_0437
PF3D7_0529400		conserved Plasmodium protein, unknown function	No	0.449107	-0.456692	-0.45245	0.120105	0.081398	-0.31183	-0.49583	-0.635386	-0.186279	0.37776	-0.0789318	-0.155039	-0.607489	-0.200544	-0.0804386	-0.301649	-0.220251	-0.72537	-1.0372	0.19346	-0.30237	PF3D7_0529400;PF3D7_0529400	1093;1013	S	___1	FRLS(1)KNEEK	4	LRNKSGSSLSVKFRLSKNEEKNVLTEKTDSV	MAL5P1.291;PF3D7_0529400.1;PF3D7_0529400.2;PFE1465w
PF3D7_1104200	SNF2L	chromatin remodeling protein	No	0.448797	-0.0165215	-0.0669613	-0.0911941	0.096241	-0.123291	-0.219888	-0.328226	0.120571	0.0598507	0.0433292	0.0109711	-0.0559902	0.00075531	-0.0904388	-0.0536709	0.0425701	0.208241	0.0849495	0.178289	-0.0415993	PF3D7_1104200	116	S	___1	NIGNDTHVS(1)YDDKRK	9	HDKNVHRNIGNDTHVSYDDKRKSYLDNNEEN	PF11_0053
PF3D7_1455300		conserved Plasmodium protein, unknown function	No	0.44875	0.10112	-0.02506	0.17821	-0.4864	-0.37897	0.07456	-2.23608	-1.78733	-1.50815	-1.40703	-1.50214	-1.5272	-1.41928	-1.24107	-1.04992	-1.53632	-1.0897	-1.46867	-1.23979	-1.16523	PF3D7_1455300	114	S	___1	KGNEMNT(0.016)DYMY(0.001)S(0.982)NNNNNIYANYVFK	12	RDSKKGNEMNTDYMYSNNNNNIYANYVFKQP	PF14_0527
PF3D7_1149100		Plasmodium exported protein, unknown function	Yes	0.448536	0.541329	0.420431	0.928185	0.33296	0.32669	0.644471	-0.858126	-0.40959	-0.83305	-0.291721	0.19586	0.616291	0.316795	1.24498	-0.0728703	0.26009	0.56819	0.89488	-0.31572	0.328751	PF3D7_1149100;PF3D7_1149100	413;414	T	___1	NS(0.022)T(0.978)NDSIKTPK	3	ETQEESLNKLSTKNSTNDSIKTPKKKSNNKN	PF11_0508;PF3D7_1149100.1;PF3D7_1149100.2
PF3D7_0627800	ACS	acetyl-CoA synthetase, putative	No	0.44825	-0.083742	-0.36503	0.050035	-0.072931	0.00855	0.003921	-1.28542	-0.83717	-0.290789	-0.374531	-0.48839	-0.85342	-0.569744	-0.519709	-0.54389	-0.616821	-0.512569	-0.504019	-0.3971	-0.393179	PF3D7_0627800	464	T	___1	S(0.031)YS(0.265)KELINT(0.704)DMVNNDNQFGDLK	9	KISYSEKSYSKELINTDMVNNDNQFGDLKTK	2270.t00165;MAL6P1.150;PFF1350c
PF3D7_1119100		tRNA m(1)G methyltransferase, putative	No	0.448045	0.021669	0.110531	0.340476	0.217419	0.293581	0.02115	0.209595	0.65764	0.78261	0.804279	0.42123	0.531761	0.375135	0.715611	0.38793	0.605349	0.25923	0.552811	0.476019	0.497169	PF3D7_1119100	310	S	___1	IIKGDS(1)EICINEK	6	SSSSVNEDERIIKGDSEICINEKKDIQVHF_	PF11_0198
PF3D7_0418700		RNA-binding protein NOB1, putative	No	0.447266	0.36631	0.342782	-0.049945	0.11949	0.184689	0.434801	-0.970955	-0.523689	-1.27173	-0.90542	-0.970881	-0.628099	-0.989565	-1.03951	-0.852921	-0.733431	-0.960949	-0.77626	-1.07624	-0.641439	PF3D7_0418700	228	S	___1	HS(1)QGDDNS(1)LGK	8	IIYLEHDKHSQGDDNSLGKNYKLSHIDDDIS	MAL4P1.176;PFD0905w
PF3D7_1467600		conserved Plasmodium protein, unknown function	No	0.44701	0.32356	0.42361	0.57632	0.36466	0.39677	0.23653	2.61343	3.06044	2.52954	2.8531	2.29766	2.72127	2.45695	3.03327	2.34888	2.71354	2.2958	2.69257	2.35386	2.59039	PF3D7_1467600	386	S	___2	YILS(0.034)S(0.962)S(0.004)HEDEAK	5	KESKSSEDYEKYILSSSHEDEAKTWTIVQKS	PF14_0644
PF3D7_0305300		conserved Plasmodium membrane protein, unknown function	No	0.44593	0.28814	0.23446	0.26497	-0.36133	0.32908	0.01295	-3.95942	-3.51349	-3.46747	-3.17933	-3.10665	-2.87219	-2.84937	-2.5844	-2.70718	-3.06851	-2.85922	-2.53014	-2.91639	-2.90344	PF3D7_0305300	318	S	___1	FS(1)EVYNSIYENLK	2	NKKKKKEDTLDDKKFSEVYNSIYENLKKKKE	MAL3P2.17;PFC0240c
PF3D7_0202000	KAHRP	knob-associated histidine-rich protein	Yes	0.44541	0.30508	0.60669	0.63176	0.4498	0.48347	-0.09421	1.26794	1.71335	1.14312	1.4482	1.65563	2.26232	1.51366	2.14542	1.13379	1.58359	1.44222	1.92569	0.55501	0.4608	PF3D7_0202000	584	T	___3	GAT(1)KEAS(0.976)T(0.022)T(0.002)EGATK	3	TSKEATKEASTSKGATKEASTTEGATKGAST	PF02_0020;PFB0100c
PF3D7_1122800	CDPK6	calcium-dependent protein kinase 6	No	0.44497	0.11913	-0.00942	0.348142	0.11338	0.17904	-0.27028	-1.60917	-1.1642	-1.43367	-1.31454	-1.2383	-1.24772	-1.32767	-0.979528	-1.3458	-1.23242	-1.32911	-1.15007	-1.20794	-1.47822	PF3D7_1122800	168	S	___1	NILDS(1)HNINK	5	MLNNYSRVNIKNILDSHNINKRELYNKHNNN	PF11_0239
PF3D7_1346400		conserved Plasmodium protein, unknown function	No	0.443915	-0.117771	0.09394	0.145096	0.09218	-0.187481	-0.17418	-0.285065	0.15885	0.60755	0.489779	0.486071	0.580011	0.602295	0.747391	0.64678	0.73896	0.852621	0.66514	0.78513	0.61095	PF3D7_1346400	2103	S	___1	RS(0.5)S(0.5)KEYILSNEK	2	NNTKENEDTNDIAKRSSKEYILSNEKKDTKT	MAL13P1.234
PF3D7_1346400		conserved Plasmodium protein, unknown function	No	0.443915	-0.117771	0.09394	0.145096	0.09218	-0.187481	-0.17418	-0.285065	0.15885	0.60755	0.489779	0.486071	0.580011	0.602295	0.747391	0.64678	0.73896	0.852621	0.66514	0.78513	0.61095	PF3D7_1346400	2104	S	___1	RS(0.5)S(0.5)KEYILSNEK	3	NTKENEDTNDIAKRSSKEYILSNEKKDTKTE	MAL13P1.234
PF3D7_0401800	PfD80	Plasmodium exported protein (PHISTb), unknown function	Yes	0.443405	0.262289	0.06336	0.768046	0.314539	0.31413	0.02255	0.301245	0.74465	0.562531	0.82482	2.87886	2.94222	0.387104	1.15515	0.29151	0.606049	0.46567	0.7798	0.302519	0.325069	PF3D7_0401800	282	S	___2	LPSTGS(0.98)T(0.019)IRFPSTGSSR	6	TGSTSGSTTRLPSTGSTIRFPSTGSSRLEDY	MAL4P1.16;PFD0080c
PF3D7_1334500	MSRP6	MSP7-like protein	Yes	0.44232	0.53769	0.02536	-0.09615	0.10287	0.46319	0.09401	-3.03074	-2.58842	-2.52224	-1.98455	-2.11496	-2.0896	-2.0877	-2.18385	-2.50306	-2.40019	-2.80363	-2.34044	-2.49869	-2.40468	PF3D7_1334500	407	Y	___1	NHS(0.11)NY(0.102)NY(0.102)KPINQENLS(0.134)MY(0.553)FNNNNK	18	SNYNYKPINQENLSMYFNNNNKKKNKKNSQK	PF13_0192
PF3D7_1464600	UIS2	serine/threonine protein phosphatase UIS2, putative	No	0.44228	0.127928	0.426521	0.253117	-0.12626	0.262959	0.321961	-1.0327	-0.59042	-0.938299	-0.810371	-1.1697	-0.743179	-0.839186	-0.586069	-2.95126	-3.07752	-0.965479	-0.70252	-1.16911	-0.847149	PF3D7_1464600	738	S	___1	SIS(0.003)S(0.997)VEER	4	ESNTSINEKEEKSISSVEERANLYEDDEEND	PF14_0614
PF3D7_0217500	CDPK1	calcium-dependent protein kinase 1	No	0.441946	0.132488	-0.261471	0.271545	-0.04952	-0.058521	-0.19881	-0.340805	0.101141	0.52586	0.658348	0.822941	0.56147	0.729815	1.00136	0.86989	0.82037	0.957111	0.89859	1.18897	0.99016	PF3D7_0217500	406	S	___1	S(1)FKNELGELK	1	QLDKKELIEGYNILRSFKNELGELKNVEEEV	PF02_0166;PFB0815w
PF3D7_1474000		probable protein, unknown function	No	0.441795	0.317929	0.408222	0.857861	0.23702	0.457349	0.54987	-0.941095	-0.4993	-1.19229	-0.874361	-1.29931	-0.891088	-1.11147	-0.253609	-1.20189	-0.96487	-1.25452	-0.797171	-1.40466	-0.85479	PF3D7_1474000	410	T	___1	IT(1)DDDIPQEK	2	NNILGNENIFEYMKITDDDIPQEKHKFYISK	PF14_0708
PF3D7_1139300	ApiAP2	AP2 domain transcription factor, putative	No	0.441506	0.074789	0.10956	0.253185	-0.16852	0.298321	0.21678	0.167995	0.609501	-0.29665	-0.221861	-0.279209	-0.169649	0.0248356	0.278021	-0.06534	-0.23386	-0.41667	-0.118349	-0.18281	0.0339699	PF3D7_1139300	1534	S	___1	DNNIS(1)NEHK	5	IAETQSTHFLKDNNISNEHKSMETFYNENSY	PF11_0404
PF3D7_1417600		conserved Plasmodium protein, unknown function	No	0.44119	-0.14455	-0.19761	-0.54898	0.3764	-0.11173	0.24561	-3.38323	-2.94204	-2.709	-2.85355	-2.82021	-3.01782	-3.02077	-3.56975	-3.20684	-2.83044	-2.74562	-2.85735	-3.07824	-2.83263	PF3D7_1417600	2461	S	___1	EVCVNS(0.972)IS(0.028)QLIIYNK	6	KDEKKDTYNKEVCVNSISQLIIYNKCKDDEY	PF14_0175
PF3D7_1237900		conserved Plasmodium protein, unknown function	Yes	0.44037	-0.07555	0.20471	-0.15514	0.29275	0.21992	-0.05372	-2.01587	-1.5755	-2.2463	-2.32185	-2.30182	-2.09711	-1.79683	-1.95197	-1.86434	-1.57159	-2.44235	-2.22243	-1.96987	-2.02359	PF3D7_1237900	918	S	___1	EVS(1)NEENREDEMIR	3	NDNSKSVSGMGEREVSNEENREDEMIRNEEV	2277.t00367;MAL12P1.365;PFL1835w
PF3D7_1212900	BDP2	bromodomain protein 2, putative	No	0.44014	-0.26208	-0.29599	0.12743	0.3527	-0.03228	0.07373	-3.00368	-2.56354	-2.15104	-2.41312	-2.46426	-2.76025	-2.49454	-2.36711	-2.83716	-2.48446	-2.68363	-2.71591	-2.73935	-2.66562	PF3D7_1212900	887	S	___1	S(0.003)S(0.02)LIS(0.977)ANKVNNSSFSK	5	HMGRINLEHYKSSLISANKVNNSSFSKGKMG	2277.t00128;MAL12P1.127;PFL0635c
PF3D7_1466800		conserved Plasmodium protein, unknown function	No	0.440086	0.236307	0.45199	0.283705	0.31404	0.41908	-0.045829	-0.190685	0.249401	-0.594059	-0.357752	-0.724529	-0.272539	-0.426655	-0.14295	-0.48362	-0.16958	-0.77375	-0.35467	-0.35689	-0.402719	PF3D7_1466800	622	S	___2	NDAYKY(0.004)S(0.998)T(0.998)DS(1)DDIER	7	NSDLYNSMKNDAYKYSTDSDDIERRLTKGIE	PF14_0636
PF3D7_1008500		conserved Plasmodium membrane protein, unknown function	No	0.43994	-0.310711	-0.54042	-0.098334	-0.12866	-0.42729	-0.38176	-2.05553	-1.61559	-0.58984	-0.900551	-1.07456	-1.61498	-0.975386	-1.07372	-1.07565	-1.20431	-1.04209	-1.46938	-0.88076	-1.26252	PF3D7_1008500	551	S	___1	NICALTNASLLKS(0.591)S(0.409)DNEK	13	KIKNICALTNASLLKSSDNEKYEKVKSNINY	2296.t00400;PF10_0082
PF3D7_1206800		conserved Plasmodium protein, unknown function	No	0.43946	0.21848	0.14126	0.29319	0.21123	0.25532	0.22325	5.76452	6.20398	5.66153	5.88001	5.63561	5.77687	5.83433	6.12752	5.74317	5.9544	5.45033	5.70565	5.76844	5.99169	PF3D7_1206800	410	S	___1	YCDES(1)DDEDIYTDNIIFSQIHGLK	5	IQLKLDKQFNRYCDESDDEDIYTDNIIFSQI	2277.t00069;MAL12P1.68;PFL0340w
PF3D7_0910200		conserved Plasmodium protein, unknown function	No	0.43899	0.13732	-0.13456	0.07207	0.24341	-0.28796	0.12528	-2.43727	-1.99828	-2.09695	-1.95963	-2.02936	-2.16392	-2.41576	-2.34369	-2.50421	-2.2608	-1.66253	-1.95049	-2.41836	-2.29308	PF3D7_0910200	2066	Y	___3	DQNES(0.944)EY(0.688)LS(0.722)DDS(0.647)DQHHVLNLK	7	NCIMEKLRKDQNESEYLSDDSDQHHVLNLKM	PFI0495w
PF3D7_1436300	PTEX150	translocon component PTEX150	No	0.438856	0.14154	0.36526	0.478611	0.52249	0.16473	0.08685	-0.646465	-0.207609	-1.28972	-1.14818	-1.35831	-0.99305	-1.22979	-0.751179	-1.24359	-0.7211	-1.39655	-1.23182	-3.1288	-3.04195	PF3D7_1436300	549	S	___1	MS(0.006)VS(0.801)T(0.194)HNK	4	SSSQFDNNKKNKMSVSTHNKKSKNLMDSLDL	PF14_0344;Pf112
PF3D7_1322200		conserved Plasmodium protein, unknown function	No	0.43834	0.06172	-0.61875	-0.05505	-0.20893	-0.10658	-0.3049	-2.50131	-2.06297	-1.92347	-1.86175	-1.74831	-2.36706	-1.97262	-2.02767	-1.86019	-2.06912	-1.91669	-2.02327	-1.80132	-2.10622	PF3D7_1322200	1164	T	___2	HREKDT(1)FINNT(1)NDMNNNINQQNK	6	HKEKDTETERHREKDTFINNTNDMNNNINQQ	MAL13P1.123;MAL13P1.124
PF3D7_1322200		conserved Plasmodium protein, unknown function	No	0.43834	0.06172	-0.61875	-0.05505	-0.20893	-0.10658	-0.3049	-2.50131	-2.06297	-1.92347	-1.86175	-1.74831	-2.36706	-1.97262	-2.02767	-1.86019	-2.06912	-1.91669	-2.02327	-1.80132	-2.10622	PF3D7_1322200	1169	T	___2	HREKDT(1)FINNT(1)NDMNNNINQQNK	11	TETERHREKDTFINNTNDMNNNINQQNKKDE	MAL13P1.123;MAL13P1.124
PF3D7_0401800	PfD80	Plasmodium exported protein (PHISTb), unknown function	Yes	0.43773	0.31187	-0.04517	0.545054	0.25648	0.24996	0.14056	1.52996	1.96769	1.25744	1.56931	2.0355	1.99033	0.958216	1.50327	1.41895	1.67543	1.34276	1.59272	1.24721	1.38777	PF3D7_0401800	135	S	___3	S(1)AS(1)AAS(0.956)T(0.036)T(0.007)R	3	STASTASAASTTRSASAASTTRSASAASTTR	MAL4P1.16;PFD0080c
PF3D7_1467600		conserved Plasmodium protein, unknown function	No	0.43763	0.34703	0.40836	0.565	0.37522	0.36935	0.26053	2.73442	3.17205	2.60241	2.94944	2.4022	2.81056	2.57372	3.13872	2.45563	2.83085	2.37559	2.74494	2.44024	2.70077	PF3D7_1467600	385	S	___2	SSEDYEKY(0.003)ILS(0.897)S(0.897)S(0.203)HEDEAK	11	KKESKSSEDYEKYILSSSHEDEAKTWTIVQK	PF14_0644
PF3D7_1429900	WRN	ADP-dependent DNA helicase RecQ	No	0.43761	-0.01739	0.45051	0.4504	0.54614	-0.11471	0.25072	-2.48219	-2.04458	-2.40369	-2.42108	-2.92157	-2.47106	-2.68748	-2.23708	-2.83951	-2.29337	-2.53937	-2.65408	-2.67728	-2.42656	PF3D7_1429900	1216	S	___1	RDES(0.846)ET(0.154)GVQGNVTHVK	4	KHDDIFSNFCYKRDESETGVQGNVTHVKKDI	PF14_0278
PF3D7_0509500		ERCC4 domain-containing protein, putative	No	0.436751	0.10094	-0.02349	0.04952	0.00834	0.14904	-0.13613	-1.2559	-0.819149	-1.33583	-1.23489	-1.24563	-1.26912	-1.32192	-1.2724	-1.16048	-1.15214	-1.35869	-1.20965	-1.25503	-1.39116	PF3D7_0509500	434	S	___1	VFS(1)PNANPHHFVS	3	RKLGKALSRKIYRVFSPNANPHHFVS_____	MAL5P1.96;PFE0470w
PF3D7_1478600	PTP3	EMP1-trafficking protein	Yes	0.436261	0.40848	0.32681	0.34086	0.1404	0.00644	0.25739	-1.26373	-0.827469	-2.46287	-2.05439	-1.18114	-0.85433	-1.35475	-1.01389	-1.20185	-1.06145	-1.16704	-1.1606	-1.58149	-1.3241	PF3D7_1478600;PF3D7_1477000	1030;775	S	___1	GIDDEES(0.5)S(0.5)NKGK	7	NKIAKTVLKGIDDEESSNKGKNENKKKKKKD	PF14_0758
PF3D7_1118500	NOP56	nucleolar protein 56, putative	No	0.4362	-0.06253	-0.40104	-0.30363	-0.66004	-0.58926	0.78453	-2.85867	-2.42247	-2.74929	-2.81182	-2.56795	-2.96899	-2.49152	-2.79515	-2.29253	-2.95257	-2.81438	-3.40364	-2.98423	-2.1997	PF3D7_1118500	473	S	___1	HDEDQHS(1)EHS(1)HQDQDEQEEKEKEK	7	NKKNKNKRKHDEDQHSEHSHQDQDEQEEKEK	PF11_0191
PF3D7_1467600		conserved Plasmodium protein, unknown function	No	0.43584	0.29498	0.34577	0.46808	0.35629	0.37861	0.2458	2.08834	2.52418	1.89122	2.1862	1.64784	1.99361	1.90895	2.37703	1.76807	2.12436	1.54499	1.9236	1.79423	2.04003	PF3D7_1467600	387	S	___2	Y(0.001)ILS(0.092)S(0.938)S(0.969)HEDEAK	6	ESKSSEDYEKYILSSSHEDEAKTWTIVQKSD	PF14_0644
PF3D7_1440100		conserved Plasmodium protein, unknown function	No	0.43538	-0.161821	-0.21214	0.25671	-0.339521	0.00794	-0.13952	-1.41096	-0.97558	-0.36171	-0.523531	-0.8342	-1.04634	-1.30112	-1.04441	-0.868589	-1.20811	-1.57558	-1.56764	-1.20199	-1.34151	PF3D7_1440100	448	S	___3	GS(1)NYGNIDAR	2	QDMNNRNNYPFEPRGSNYGNIDARSDVVVGS	PF14_0380
PF3D7_0409100	PRPF31	U4/U6 small nuclear ribonucleoprotein PRP31, putative	No	0.43518	0.42218	0.65815	0.19252	0.78154	0.44862	0.36516	-3.42809	-2.99291	-3.73637	-3.31419	-4.20055	-3.5424	-3.80562	-3.6131	-4.11154	-3.33	-3.60927	-3.16065	-3.54526	-3.1801	PF3D7_0409100	500	T	___2	NLNVHS(0.252)S(0.24)GAT(0.223)GGLS(0.211)S(0.215)S(0.216)LIFT(0.642)PLQGIELYNPSLINAK	20	HSSGATGGLSSSLIFTPLQGIELYNPSLINA	MAL4P2.27;PFD0450c
PF3D7_0819500		conserved protein, unknown function	No	0.43498	0.089569	-0.26494	0.21618	0.0057	-0.03491	-0.16006	-1.87523	-1.44025	-1.02227	-0.932701	-1.13201	-1.39695	-1.15624	-0.94006	-1.31598	-1.31028	-1.03563	-1.07054	-1.13915	-1.29921	PF3D7_0819500	29	S	___2	LQICNGKNNS(0.661)S(0.661)S(0.661)ENENT(0.014)LS(0.002)S(0.001)K	11	EQNVKLQICNGKNNSSSENENTLSSKYFRKE	MAL8P1.63
PF3D7_0702500		Plasmodium exported protein, unknown function	Yes	0.43451	0.62977	0.34135	0.47301	0.32797	0.21436	0.38781	1.44802	1.88253	1.68531	2.31508	2.00345	2.3448	2.07582	2.54883	1.78223	2.1102	2.48335	2.69771	1.34481	1.73262	PF3D7_0702500	167	S	___2	NS(0.168)S(0.832)QHS(1)VGS(0.998)HS(0.002)VSSQEHK	9	GSNSDGRNSSQHSVGSHSVSSQEHKKEHSTH	PF07_0008
PF3D7_1237700		conserved protein, unknown function	No	0.43439	-0.0535	-0.01673	-0.10798	-0.24449	-0.341	0.06601	-1.81335	-1.37896	-1.80009	-1.85359	-1.70374	-1.72047	-1.82442	-1.9324	-1.55837	-1.80286	-1.48856	-1.82956	-1.73764	-1.67163	PF3D7_1237700	77	S	___1	GVPLPES(0.5)AS(0.5)EAKK	7	LLRSLKNMKGVPLPESASEAKKLLEEMKNSE	2277.t00365;MAL12P1.363;PFL1825w
PF3D7_1149000	Pf332	antigen 332, DBL-like protein	Yes	0.43412	0.47962	0.57172	1.0093	0.22087	0.28866	0.66588	-3.04556	-2.61144	-3.19202	-2.7124	-2.57794	-2.00622	-3.27118	-2.26188	-3.52871	-3.30784	-2.80486	-2.5162	-4.18615	-3.52027	PF3D7_1149000	2551	S	___1	EESVTEEIVRQEES(0.923)T(0.038)T(0.038)EK	14	EKEESVTEEIVRQEESTTEKIVKDVSPTEDF	PF11_0506;PF11_0507
PF3D7_1008000	HDA2	histone deacetylase 2	No	0.43362	-0.23218	0.03442	-0.29372	0.11504	-0.22821	-0.27312	-2.99953	-2.56591	-2.55809	-2.79027	-2.85697	-2.82255	-2.52044	-2.81416	-2.57977	-2.46473	-2.62489	-2.8531	-2.71682	-2.98994	PF3D7_1008000	2378	T	___1	ELYLSNT(0.001)DVT(0.276)NDT(0.723)V	13	RIKELYLSNTDVTNDTV______________	PF10_0078
PF3D7_1359100		riboflavin kinase / FAD synthase family protein, putative	No	0.43337	0.45935	0.34994	0.51376	0.25269	0.32338	0.08967	-1.93863	-1.50526	-1.90215	-1.4428	-1.80629	-1.45635	-1.95035	-1.43659	-2.20262	-1.94993	-1.96305	-1.63967	-1.87086	-1.78119	PF3D7_1359100	149	S	___1	QS(0.198)HT(0.198)EIS(0.51)LS(0.094)DYANKEIAINNNINNK	7	DVDKLEEGRQSHTEISLSDYANKEIAINNNI	MAL13P1.292
PF3D7_1122500	KIC10	conserved Plasmodium protein, unknown function	No	0.43284	0.0145	-0.0301	-0.001093	-0.0427	-0.01065	-0.163399	-1.09106	-0.65822	-0.96628	-0.95178	-1.2594	-1.2895	-0.983246	-0.984339	-0.83777	-0.88047	-1.32938	-1.34003	-0.886711	-1.05011	PF3D7_1122500	857	T	___1	NFFFS(0.257)FNT(0.996)DS(0.747)EDY(0.001)NNK	8	NYNKNKKRNFFFSFNTDSEDYNNKYLNNSSF	PF11_0233
PF3D7_0801700	SENP2	sentrin-specific protease 2, putative	No	0.432346	0.286319	0.194721	0.541806	0.154919	0.010231	0.29607	-0.935375	-0.503029	-0.968	-0.681681	-0.92198	-0.727259	-0.979525	-0.437719	-1.03257	-0.877651	-0.86936	-0.859129	-1.03447	-0.7384	PF3D7_0801700	921	S	___1	QS(0.009)DS(0.99)ISIR	4	KKYMHNPQPYNKQSDSISIRNTESINEENIS	MAL8P1.157
PF3D7_0500800	MESA	mature parasite-infected erythrocyte surface antigen	Yes	0.432337	0.195198	0.49299	0.542816	0.42063	0.09782	0.557051	-0.248116	0.184221	-0.496309	-0.301111	-0.663349	-0.170359	-0.528065	0.0147514	-0.401291	0.0193386	-0.35317	-0.25535	-0.70854	-0.151489	PF3D7_0500800	404	S	___1	ES(0.222)S(0.588)EET(0.19)KDDKPEENEK	3	PKKLTEQEENGTKESSEETKDDKPEENEKKA	MAL5P1.9;PFE0040c
PF3D7_1372400	ACS4	acyl-CoA synthetase	Yes	0.43199	-0.0713	0.32945	-0.05665	-0.03798	-0.04494	0.03271	-2.41246	-1.98047	-1.80525	-1.87655	-2.31403	-1.98458	-1.729	-1.78565	-1.49244	-1.53042	-1.61496	-1.6599	-1.66496	-1.63225	PF3D7_1372400	747	S	___2	LS(0.123)GS(0.872)S(0.463)T(0.328)GS(0.214)MNNGER	4	YIDAVKKKYEEKLSGSSTGSMNNGERCEKKD	MAL13P1.485
PF3D7_0206300	AROM	pentafunctional AROM polypeptide, putative, pseudogene	No	0.43186	-0.18451	0.34015	-0.03734	0.13252	0.71339	0.07868	-1.57018	-1.13832	-1.37673	-1.56124	-1.74339	-1.40324	-1.50768	-1.54502	-1.60045	-1.46793	-1.88255	-1.16916	-1.6242	-1.54552	PF3D7_0206300	741	S	___2	TNIININENS(0.001)IY(0.012)LIDS(0.993)S(0.993)DKENDRPMS(0.001)S(0.001)K	16	TNIININENSIYLIDSSDKENDRPMSSKRKR	PF02_0059;PF02_0060;PF3D7_0206400;PFB0279w;PFB0280w
PF3D7_0206300	AROM	pentafunctional AROM polypeptide, putative, pseudogene	No	0.43186	-0.18451	0.34015	-0.03734	0.13252	0.71339	0.07868	-1.57018	-1.13832	-1.37673	-1.56124	-1.74339	-1.40324	-1.50768	-1.54502	-1.60045	-1.46793	-1.88255	-1.16916	-1.6242	-1.54552	PF3D7_0206300	742	S	___2	TNIININENS(0.001)IY(0.012)LIDS(0.993)S(0.993)DKENDRPMS(0.001)S(0.001)K	17	NIININENSIYLIDSSDKENDRPMSSKRKRE	PF02_0059;PF02_0060;PF3D7_0206400;PFB0279w;PFB0280w
PF3D7_1467600		conserved Plasmodium protein, unknown function	No	0.43171	0.14737	0.27897	0.63223	0.25743	0.38016	0.19698	-1.90432	-1.47261	-1.91054	-1.76317	-2.18243	-1.90346	-2.10017	-1.46794	-2.30425	-2.04682	-2.11608	-1.73592	-2.16646	-1.96948	PF3D7_1467600	2	S	___1	S(0.992)DILY(0.008)GNSLSNGK	1	______________MSDILYGNSLSNGKKSK	PF14_0644
PF3D7_0702500		Plasmodium exported protein, unknown function	Yes	0.43162	0.19973	0.28632	0.55294	0.2875	0.3461	0.08941	9.52423	9.95585	9.21442	9.41415	9.33138	9.6177	9.46956	10.0225	9.24552	9.53302	8.89851	9.24461	7.29806	7.38747	PF3D7_0702500	224	S	___1	SFS(0.999)GS(0.001)K	3	HYSLGGQPSSSGRSFSGSKYNTSNLASSSTT	PF07_0008
PF3D7_0626800	PyrK	pyruvate kinase	No	0.43092	-0.01802	0.12734	0.35178	0.05704	-0.00202	-0.02692	1.39367	1.82459	2.24152	2.2235	1.91099	2.03833	2.08117	2.43295	2.08751	2.14455	2.08514	2.08312	2.34282	2.3159	PF3D7_0626800	9	S	___1	NS(1)AAGASMQSAANITLR	2	_______MSSFKYKNSAAGASMQSAANITLR	2270.t00155;MAL6P1.160;PFF1300w
PF3D7_0910200		conserved Plasmodium protein, unknown function	No	0.4304	0.19687	0.14193	0.23493	0.26273	0.3208	0.10256	-1.53666	-1.10626	-1.34012	-1.14325	-1.58214	-1.44021	-1.4495	-1.21457	-1.42904	-1.16631	-1.75359	-1.43279	-1.43857	-1.33601	PF3D7_0910200	276	S	___1	S(0.005)YENS(0.993)Y(0.002)DNFNDYDLFGINSPIEK	5	EEQENLYLCNKSYENSYDNFNDYDLFGINSP	PFI0495w
PF3D7_0323100		conserved Plasmodium protein, unknown function	No	0.430056	0.145588	0.339401	0.621807	0.447299	0.29611	-0.082779	-0.665205	-0.235149	-0.89971	-0.754122	-1.05154	-0.712139	-0.872246	-0.250439	-1.03486	-0.587561	-1.25407	-0.95796	-0.924591	-1.00737	PF3D7_0323100	1170	S	___1	NNVSNDCVNNS(1)DCNSAYYNILR	11	DNNIRNNVSNDCVNNSDCNSAYYNILREEKY	MAL3P7.37;PFC1030w
PF3D7_0936800		Plasmodium exported protein (PHISTc), unknown function	Yes	0.429966	0.217419	0.267519	0.557756	0.355697	0.198879	0.150061	0.483204	0.91317	0.257101	0.47452	0.330221	0.59774	0.405945	0.963701	0.262871	0.618568	0.45236	0.651239	0.390049	0.54011	PF3D7_0936800	275	S	___1	GYLGEVES(1)ETIKK	8	HSRGIFAKGYLGEVESETIKKKTEHHENVNE	PFI1780w
PF3D7_0803100	UTP14	U3 small nucleolar RNA-associated protein 14, putative	No	0.4299	-0.34806	0.31673	-0.05594	-0.25216	0.05117	0.08572	-3.44462	-3.01472	-2.74455	-3.09261	-3.20637	-2.88964	-3.29774	-3.35368	-2.82895	-3.08111	-2.94494	-2.89377	-3.13673	-3.05101	PF3D7_0803100	922	T	___1	TDILHIDDVEDIT(0.965)DVIS(0.023)GY(0.012)DEEDNEK	13	LKKTDILHIDDVEDITDVISGYDEEDNEKNG	PF08_0127
PF3D7_0918900	gammaGCS	gamma-glutamylcysteine synthetase	No	0.42957	0.05347	0.07301	0.09834	0.31256	0.17814	-0.08544	1.65071	2.08028	1.26937	1.32284	1.13092	1.20393	1.38614	1.48448	1.36333	1.67589	0.766541	0.944681	1.43213	1.34669	PF3D7_0918900	1042	T	___2	T(1)IY(0.001)EES(0.987)MDNT(0.013)VEFAK	1	EVLKDDQDYCTCTRRTIYEESMDNTVEFAKK	PFI0925w
PF3D7_1139100		RNA-binding protein, putative	No	0.428421	0.23417	0.425501	0.200061	0.28174	0.22605	0.19822	-1.41774	-0.989319	-1.26023	-1.02606	-1.37558	-0.950079	-1.19165	-0.991589	-1.43826	-1.15652	-1.20106	-0.97501	-1.34705	-1.14883	PF3D7_1139100	808	S	___1	VMDS(0.002)PS(0.998)ESNTGLLSSFDFR	6	NNENNMMNEKVMDSPSESNTGLLSSFDFRSH	PF11_0402
PF3D7_0302500	CLAG3.1	cytoadherence linked asexual protein 3.1	Yes	0.427866	0.404888	0.238849	0.465098	0.260238	0.36964	0.22388	-0.402216	0.02565	-0.0840492	0.320839	-0.152849	0.0860004	-0.0537357	0.411362	-0.328779	-0.0685406	-0.20652	0.16312	-0.43881	-0.21493	PF3D7_0302500	1325	S	___1	MS(0.58)T(0.42)YVDDFAFFDDCGK	2	NLRRYDMENAFKNKMSTYVDDFAFFDDCGKN	MAL3P1.5;PFC0120w
PF3D7_0830500	TryThrA	sporozoite and liver stage tryptophan-rich protein, putative	Yes	0.42777	0.21065	0.30799	0.20755	-0.07249	-0.68501	0.30557	-2.18431	-1.75654	-2.23102	-2.02037	-2.05906	-1.75107	-2.11481	-1.90726	-2.11836	-2.19085	-1.61217	-2.29718	-2.53673	-2.23116	PF3D7_0830500	438	S	___1	S(0.039)DLES(0.96)IMEEDENEYNS(0.001)FDENEEENDEK	5	ILKFFPLFNYKSDLESIMEEDENEYNSFDEN	PF08_0003
PF3D7_0730900	PTP4	EMP1-trafficking protein	Yes	0.427654	0.413229	-0.17219	0.614166	0.173128	0.38433	-0.04398	-0.649734	-0.22208	-1.01849	-0.605261	-2.54594	-2.71813	-0.620565	-0.00639915	-0.845329	-0.672201	-1.2086	-0.82427	-0.67375	-0.71773	PF3D7_0730900	334	S	___1	VNTTNNAPNVIKS(0.956)NT(0.044)HGGMNNK	13	NNKVNTTNNAPNVIKSNTHGGMNNKVNTTNN	MAL7P1.171
PF3D7_0302100	SRPK1	serine/threonine protein kinase	No	0.42765	0.25217	0.34396	0.46689	0.26994	0.45117	0.27984	2.31812	2.74577	2.39043	2.6426	2.28305	2.62701	2.24677	2.71366	2.1216	2.39154	2.0512	2.50237	2.08976	2.3696	PF3D7_0302100	1201	T	___1	RDINFKECT(1)PR	9	IYILQNKRDINFKECTPRNNINKEIKSDKYQ	MAL3P1.1;PFC0105w
PF3D7_1212700	EIF3A	eukaryotic translation initiation factor 3 subunit A, putative	No	0.42758	-0.08231	0.54728	0.45477	-0.13559	0.14182	0.22144	-1.58855	-1.16097	-1.3077	-1.39001	-1.8523	-1.30502	-1.86979	-1.41502	-1.68999	-1.82558	-1.84669	-1.70487	-1.69671	-1.47527	PF3D7_1212700	1035	T	___2	SSIDDDLT(1)WR	8	RSERSHRKSSIDDDLTWRRGDKGGSQNGDDS	2277.t00126;MAL12P1.125;PFL0625c
PF3D7_1036800	ACT	acetyl-CoA transporter, putative	No	0.42707	0.13977	-0.13879	-0.02406	-0.12886	-0.17226	0.12874	-2.42994	-2.00287	-2.19042	-2.05065	-1.68569	-1.82448	-1.78973	-1.81379	-1.95749	-2.08635	-1.76446	-1.93672	-1.87693	-1.74819	PF3D7_1036800	321	T	___1	INNQIRT(1)NEHIK	7	NAKMNYPKKINNQIRTNEHIKINDIKQTNIQ	PF10_0360
PF3D7_1410300		WD repeat-containing protein, putative	No	0.42603	-0.23165	-0.24585	0.09628	0.1574	-0.60361	-0.48201	-3.38741	-2.96138	-3.60859	-3.84024	-3.70046	-3.94631	-3.87584	-3.77956	-3.63115	-3.47375	-3.11091	-3.71452	-3.12202	-3.60403	PF3D7_1410300	3722	S	___1	GIT(0.005)FY(0.02)S(0.601)AS(0.124)DS(0.124)LNS(0.124)DINEFS(0.001)YK	6	FNDFNKDIRKGITFYSASDSLNSDINEFSYK	PF14_0101
PF3D7_0210600	CERLI1	conserved Plasmodium protein, unknown function	No	0.42593	-0.27588	0.27474	0.1143	0.07605	0.20337	-0.16355	-3.42529	-2.99936	-2.6414	-2.91728	-2.87216	-2.59742	-2.58704	-2.47274	-2.71771	-2.64166	-2.4807	-2.27733	-2.34634	-2.50989	PF3D7_0210600	424	Y	___2	VEVLS(1)DMDNEENY(0.734)MNS(0.266)GDLGPVFK	13	KKKVEVLSDMDNEENYMNSGDLGPVFKDMSK	PF02_0099;PFB0475c
PF3D7_1107800	ApiAP2	AP2 domain transcription factor, putative	No	0.42573	0.40152	0.49701	0.32666	0.24898	0.19535	0.35143	1.50682	1.93255	1.52798	1.9295	1.4215	1.91851	1.57688	1.90354	1.50698	1.75596	1.55257	1.74792	1.38212	1.73355	PF3D7_1107800	1497	S	___1	GVYFS(0.003)KS(0.997)PR	7	VNPNDDKVKGVYFSKSPRGVGKWNAYFQIAN	PF11_0091
PF3D7_1328300		conserved Plasmodium protein, unknown function	No	0.42542	-0.06227	0.04492	-0.01148	-0.18159	0.27974	-0.13712	-2.10723	-1.68181	-1.63352	-1.69579	-1.74899	-1.70407	-1.76534	-1.77682	-1.67721	-1.8588	-1.86066	-1.58092	-1.62151	-1.75863	PF3D7_1328300	52	S	___1	EVELMETIENLS(0.008)DDIGS(0.008)NNFS(0.036)Y(0.024)DS(0.913)NDS(0.009)S(0.002)K	24	ENLSDDIGSNNFSYDSNDSSKIHNRKNNDKS	PF13_0154
PF3D7_0513800	RAB1a	ras-related protein Rab-1A	No	0.425316	-0.17717	-0.07	-0.014255	0.055909	-0.08046	-0.102709	-0.871065	-0.445749	-0.6597	-0.83687	-0.763639	-0.833639	-0.950375	-0.96463	-0.75775	-0.701841	-0.7917	-0.87216	-0.790991	-0.8937	PF3D7_0513800	150	S	___1	ELNIS(1)FIETSAK	5	ITTMEGQNKAKELNISFIETSAKDATNVELA	MAL5P1.139;PFE0690c
PF3D7_1145100	SEC21	coatomer subunit gamma, putative	No	0.424896	0.246868	0.340939	0.636155	0.298201	0.251139	0.25545	0.510294	0.93519	0.352591	0.599459	0.395521	0.73646	0.370325	1.00648	0.242689	0.54089	0.381151	0.63229	0.1982	0.45365	PF3D7_1145100	745	S	___1	DYVS(0.012)S(0.988)PFINK	5	QIIASNDLNNKDYVSSPFINKKNKTSYNEIP	PF11_0463
PF3D7_0303200		HAD superfamily protein, putative	No	0.424684	-0.120041	-0.12439	-0.137255	0.0871811	0.080889	-0.450899	-0.474464	-0.0497799	0.0769806	-0.0430603	-0.321159	-0.445549	-0.028965	-0.16622	-0.00521088	0.0819702	-0.632429	-0.55154	0.18664	-0.264259	PF3D7_0303200	688	S	___1	S(0.021)HS(0.979)KGDQDAIFDDDIQNR	3	DDNNNHNDNNNKRSHSKGDQDAIFDDDIQNR	MAL3P1.12;PFC0150w
PF3D7_0708400	HSP90	heat shock protein 90	No	0.42434	0.04107	0.47257	0.72306	-0.24215	0.46469	0.15803	-2.87839	-2.45405	-2.1884	-2.14733	-2.76637	-2.2938	-3.00333	-2.28027	-2.82218	-3.06433	-2.95387	-2.48918	-3.09526	-2.93723	PF3D7_0708400	733	T	___1	LGLSIDEEENNDIDLPPLEET(0.99)VDAT(0.008)DS(0.002)K	21	DEEENNDIDLPPLEETVDATDSKMEEVD___	PF07_0029
PF3D7_1353300		conserved Plasmodium protein, unknown function	No	0.42384	0.04833	-0.01182	0.20166	-0.43839	-0.48167	0.04512	-3.41456	-2.99072	-2.99366	-2.94533	-2.53561	-2.54743	-2.86555	-2.66389	-2.51743	-2.95582	-2.14023	-2.6219	-2.57327	-2.52815	PF3D7_1353300	1772	S	___2	NS(0.985)LNT(0.015)IEYFENNLSFFNK	2	RDNDNNINVEIYKKNSLNTIEYFENNLSFFN	PF13_0277
PF3D7_1353300		conserved Plasmodium protein, unknown function	No	0.42384	0.04833	-0.01182	0.20166	-0.43839	-0.48167	0.04512	-3.41456	-2.99072	-2.99366	-2.94533	-2.53561	-2.54743	-2.86555	-2.66389	-2.51743	-2.95582	-2.14023	-2.6219	-2.57327	-2.52815	PF3D7_1353300	1784	S	___2	NSLNTIEYFENNLS(1)FFNK	14	KKNSLNTIEYFENNLSFFNKIHKMNKKKDEY	PF13_0277
PF3D7_0922800		conserved Plasmodium protein, unknown function	No	0.423465	0.160139	0.151261	0.164837	-0.000971	0.076011	0.153721	0.189816	0.613281	0.40369	0.563829	0.54265	0.693911	0.487894	0.652731	0.50746	0.506489	0.49441	0.570421	0.353519	0.50724	PF3D7_0922800	164	S	___1	QVHPNIYYNNCLS(1)DVHEK	13	FIRQVHPNIYYNNCLSDVHEKNDRSKFEVLK	PFI1120c
PF3D7_0500800	MESA	mature parasite-infected erythrocyte surface antigen	Yes	0.423366	0.666859	0.4385	0.879776	0.70307	0.532341	0.437332	-0.614786	-0.19142	-0.93919	-0.272331	-2.00253	-1.56403	-0.620565	0.259211	-0.822901	-0.119831	-0.67684	-0.144499	-0.930481	-0.493149	PF3D7_0500800	342	S	___1	VS(0.905)GPY(0.075)ENS(0.02)ENSNVTSESEETK	2	VKITEESKDREGNKVSGPYENSENSNVTSES	MAL5P1.9;PFE0040c
PF3D7_0802200	1-CysPxn	1-cys peroxiredoxin	No	0.422975	0.106777	0.142891	0.261745	0.201099	0.2484	-0.11072	-0.800634	-0.377659	-0.543459	-0.436682	-0.70994	-0.567049	-0.822805	-0.56106	-0.73773	-0.536631	-0.788439	-0.540039	-0.53524	-0.64596	PF3D7_0802200	189	S	___1	CCILPS(1)VDNADLPK	6	TPVNWKEGDKCCILPSVDNADLPKLFKNEVK	PF08_0131
PF3D7_1317900	NOC4	small ribosomal subunit nuclear export protein, putative	No	0.4229	0.73891	-0.13943	-0.11987	0.03746	-0.12132	0.03789	-2.97038	-2.54748	-3.10135	-2.36244	-2.28567	-2.4251	-2.50739	-2.62726	-2.65497	-2.61751	-2.1755	-2.29682	-2.86272	-2.82483	PF3D7_1317900	93	S	___1	DS(1)IIFDIPR	2	INNFDEKLKYFFRKDSIIFDIPRKQKGYNKY	MAL13P1.93
PF3D7_1238500		conserved Plasmodium protein, unknown function	No	0.422761	0.15713	0.157351	0.192495	0.167789	0.133379	0.12252	-1.05783	-0.635069	-0.67071	-0.51358	-0.61311	-0.455759	-0.620674	-0.428179	-0.83671	-0.668921	-0.437799	-0.30442	-0.816801	-0.694281	PF3D7_1238500	693	S	___1	NLHES(1)DEQNIDILTDEPILLNLNNEGSTNK	5	DNNYPLNENQKNLHESDEQNIDILTDEPILL	2277.t00373;MAL12P1.371;PFL1865w
PF3D7_0317000		proteasome subunit alpha type-3, putative	No	0.42234	0.39088	-0.79861	-0.11429	-0.02967	-0.98575	-0.01254	-4.90622	-4.48388	-4.36052	-3.96964	-4.48282	-5.28143	-4.68917	-4.80346	-4.86665	-4.89632	-4.08509	-5.07084	-4.36888	-4.38142	PF3D7_0317000	16	S	___1	AGLSAGYDLS(0.004)VS(0.19)T(0.162)FS(0.644)PDGR	15	MAGLSAGYDLSVSTFSPDGRLYQVEYIYKSI	MAL3P6.31;PFC0745c
PF3D7_1223100	PKAr	cAMP-dependent protein kinase regulatory subunit	No	0.42225	0.04178	0.23012	0.34673	0.15699	0.03824	-0.180199	-2.37969	-1.95744	-1.72325	-1.68147	-1.60302	-1.3729	-1.75189	-1.40516	-1.40542	-1.24843	-1.48775	-1.44951	-0.919441	-1.09964	PF3D7_1223100	83	S	___2	TDS(1)EILDGLDYSEMSK	3	SKKPSKTKIPITKTDSEILDGLDYSEMSKQV	2277.t00222;MAL12P1.222;PFL1110c
PF3D7_1223100	PKAr	cAMP-dependent protein kinase regulatory subunit	No	0.42225	0.04178	0.23012	0.34673	0.15699	0.03824	-0.180199	-2.37969	-1.95744	-1.72325	-1.68147	-1.60302	-1.3729	-1.75189	-1.40516	-1.40542	-1.24843	-1.48775	-1.44951	-0.919441	-1.09964	PF3D7_1223100	79	T	___2	IPIT(0.666)KT(0.666)DS(0.666)EILDGLDY(0.002)S(0.001)EMSK	4	GFSLSKKPSKTKIPITKTDSEILDGLDYSEM	2277.t00222;MAL12P1.222;PFL1110c
PF3D7_1223100	PKAr	cAMP-dependent protein kinase regulatory subunit	No	0.42225	0.04178	0.23012	0.34673	0.15699	0.03824	-0.180199	-2.37969	-1.95744	-1.72325	-1.68147	-1.60302	-1.3729	-1.75189	-1.40516	-1.40542	-1.24843	-1.48775	-1.44951	-0.919441	-1.09964	PF3D7_1223100	81	T	___2	IPIT(0.666)KT(0.666)DS(0.666)EILDGLDY(0.002)S(0.001)EMSK	6	SLSKKPSKTKIPITKTDSEILDGLDYSEMSK	2277.t00222;MAL12P1.222;PFL1110c
PF3D7_0113200		Plasmodium exported protein, unknown function	Yes	0.42206	0.35479	0.32256	0.32652	0.23896	0.11252	0.11487	1.93301	2.35507	1.92855	2.28334	1.90799	2.23055	2.08587	2.41239	2.01972	2.25868	2.35313	2.46565	1.98799	2.10286	PF3D7_0113200	365	S	___1	SENENDDES(1)DYDDDEELQGHSVVYNDK	9	RTNNQHRSENENDDESDYDDDEELQGHSVVY	MAL1P3.08;PFA0630c
PF3D7_1140700		conserved Plasmodium protein, unknown function	No	0.42203	0.34163	0.34497	0.42434	0.42537	0.31027	0.16133	1.66627	2.0883	1.25434	1.59597	1.36328	1.70825	1.38342	1.80776	1.39714	1.82251	1.17055	1.48082	1.37283	1.53416	PF3D7_1140700	1003	S	___2	SYS(1)NNS(1)AYVNR	6	IVKNLFCNKKSYSNNSAYVNRGISEYAEENI	PF11_0418
PF3D7_0926100		protein kinase, putative	No	0.422026	0.133279	0.083501	0.187785	0.173859	0.193609	0.220512	0.811954	1.23398	0.889191	1.02247	0.86377	0.947271	0.855865	1.04365	0.836901	1.01076	0.876091	1.0697	0.769089	0.989601	PF3D7_0926100	811	S	___1	IQT(0.003)NES(0.997)EDIRK	6	NYKRLLSYQKIQTNESEDIRKNNDNYYMNNL	PFI1280c
PF3D7_1222000		tRNA-splicing ligase RtcB, putative	No	0.42196	0.26039	0.13606	0.42816	0.0837	0.2035	-0.16617	1.99143	2.41339	2.61188	2.87227	3.0268	3.16286	2.73801	3.16617	2.53379	2.61749	3.03703	3.24053	0.14473	-0.0214405	PF3D7_1222000	457	T	___2	EY(0.003)MY(0.003)VT(0.995)RKGAT(0.494)S(0.428)S(0.078)K	6	MYLDNNEIKKEYMYVTRKGATSSKKNQYGII	2277.t00212;MAL12P1.212;PFL1060c
PF3D7_0509900		conserved Plasmodium protein, unknown function	No	0.421955	-0.06975	0.136881	-0.071884	0.22369	-0.031389	-0.008678	-0.0333347	0.38862	0.59664	0.52689	0.135651	0.272532	0.375755	0.303871	0.40708	0.63077	0.34222	0.310831	0.507349	0.498671	PF3D7_0509900	2	S	___1	S(0.99)DY(0.009)EKGSSNDEVAEISR	1	______________MSDYEKGSSNDEVAEIS	MAL5P1.100;PFE0490w
PF3D7_1022000		RNA-binding protein, putative	No	0.421386	-0.0165615	0.194479	0.235827	-0.0080299	0.132879	0.132421	0.191195	0.612581	-0.03125	-0.0478115	0.0124512	0.20693	-0.0239449	0.211882	-0.0571709	-0.0652008	-0.298359	-0.16548	-0.152851	-0.0204296	PF3D7_1022000	704	S	___1	S(1)LLENEYK	1	SNTQHLSIPDTNSSKSLLENEYKNKFPLNNS	PF10_0214
PF3D7_0109400		tubulin-specific chaperone a, putative	No	0.4212	-0.14769	-0.0105	0.03807	-0.01581	-0.26273	0.14106	-3.60651	-3.18531	-3.01892	-3.16661	-2.88719	-2.89769	-3.12772	-3.08965	-3.22458	-3.24039	-2.84828	-3.11101	-3.20153	-3.06047	PF3D7_0109400	153	S	___1	KS(0.006)VIS(0.988)EPVLY(0.006)QMEECIDI	5	HIKDATLPSSKKSVISEPVLYQMEECIDI__	MAL1P2.21;PFA0460c
PF3D7_1149000	Pf332	antigen 332, DBL-like protein	Yes	0.420906	0.48246	0.269661	0.103245	0.862049	0.32441	0.197059	-0.505745	-0.0848389	-0.95392	-0.47146	-0.9429	-0.673239	-0.749914	-0.646669	-1.45812	-0.596071	-1.33292	-1.00851	-1.06694	-0.869881	PF3D7_1149000	4734	S	___1	QGS(0.938)VT(0.062)EEIVEEEELDTEEVLEDK	3	EEDKSVIEEAVEKQGSVTEEIVEEEELDTEE	PF11_0506;PF11_0507
PF3D7_0822900		conserved Plasmodium protein, unknown function	No	0.42048	0.30885	0.1007	-0.01519	0.04486	-0.12137	-0.61547	1.18394	1.60442	1.66882	1.97767	1.85394	1.95464	2.16545	2.15026	1.88874	1.9336	2.28784	2.16647	2.62081	2.00534	PF3D7_0822900	987	S	___1	QS(0.035)S(0.965)MTNSINSK	3	PEYQNSNEQYHQKQSSMTNSINSKSNIYNNS	PF08_0035
PF3D7_0826700	RACK1	receptor for activated c kinase	No	0.42042	-0.09958	-0.26666	0.16991	0.39718	-0.09114	-0.10842	-2.14398	-1.72356	-1.38131	-1.48089	-1.51036	-1.77702	-1.61413	-1.44422	-1.86158	-1.4644	-1.55804	-1.64918	-1.45394	-1.56236	PF3D7_0826700	208	T	___1	NLEGHTGVLNT(0.012)VT(0.506)IS(0.24)PDGS(0.24)LCAS(0.001)GGK	13	LNKNLEGHTGVLNTVTISPDGSLCASGGKDG	PF08_0019
PF3D7_1230200		vacuolar transporter chaperone, putative, pseudogene	No	0.420076	0.155868	0.000551	0.032887	0.119999	0.096051	-0.042538	-0.337816	0.0822601	0.570721	0.726589	0.36689	0.367441	0.524185	0.557072	0.31139	0.431389	0.54512	0.641171	0.447199	0.404661	PF3D7_1230200	944	S	___1	YSNNFKDIS(1)IK	9	NINKFNKYSNNFKDISIKNTSLIYDNNLYEP	2277.t00291;MAL12P1.291;PFL1455w
PF3D7_1442700		conserved Plasmodium protein, unknown function	No	0.41923	-0.21762	0.47586	-0.4895	0.86347	0.15785	-0.78636	-4.93644	-4.51721	-4.74903	-4.96665	-5.49051	-5.01465	-4.23032	-4.71982	-5.86946	-5.00599	-4.97085	-4.813	-4.54833	-5.33469	PF3D7_1442700	2303	S	___1	S(0.5)FS(0.5)LDMCLLK	1	NKIYNKNDHMVKFDKSFSLDMCLLKLRRKNL	PF14_0405
PF3D7_1149000	Pf332	antigen 332, DBL-like protein	Yes	0.419086	0.256798	0.29079	0.295895	0.14748	0.17448	0.098499	0.721544	1.14063	0.693531	0.950329	0.86858	1.15937	0.735355	1.03125	0.75181	0.89929	0.50976	0.68424	0.46924	0.567739	PF3D7_1149000	142	S	___1	ENGLDVCKS(1)QCEER	9	KDETFSRENGLDVCKSQCEERSRDDTEDQFL	PF11_0506;PF11_0507
PF3D7_1234100	BDP5	bromodomain protein, putative	No	0.41874	0.32848	0.17815	-0.20418	-0.32242	-0.05241	0.06172	-2.8288	-2.41006	-2.75699	-2.42851	-2.44649	-2.26834	-2.42877	-2.63295	-2.5537	-2.87612	-2.53208	-2.58449	-2.70305	-2.64133	PF3D7_1234100	3615	S	___2	Y(0.054)NS(0.904)LNNNDEDEET(0.042)EDIYYTHEEHGK	3	KKRKKGKENMNNRYNSLNNNDEDEETEDIYY	2277.t00329;MAL12P1.328;PFL1645w
PF3D7_1234100	BDP5	bromodomain protein, putative	No	0.41874	0.32848	0.17815	-0.20418	-0.32242	-0.05241	0.06172	-2.8288	-2.41006	-2.75699	-2.42851	-2.44649	-2.26834	-2.42877	-2.63295	-2.5537	-2.87612	-2.53208	-2.58449	-2.70305	-2.64133	PF3D7_1234100	3625	T	___2	YNSLNNNDEDEET(1)EDIYYTHEEHGK	13	NNRYNSLNNNDEDEETEDIYYTHEEHGKFKK	2277.t00329;MAL12P1.328;PFL1645w
PF3D7_1438400	MCA2	metacaspase-like protein	No	0.418465	0.25566	0.30016	0.221117	0.200248	0.18971	0.167601	0.458925	0.87739	0.81572	1.07138	0.690151	0.990311	0.773054	0.994171	0.689631	0.889879	0.67277	0.86248	0.636709	0.80431	PF3D7_1438400	1076	S	___1	YVNQFTNQNENS(1)LYNFTTHHNNIK	12	LENKYVNQFTNQNENSLYNFTTHHNNIKNNN	PF14_0362;PF14_0363
PF3D7_1442400	KIC9	conserved Plasmodium protein, unknown function	No	0.41812	0.10411	0.286611	0.02647	-0.057589	0.075319	0.00167	-1.36455	-0.94643	-1.17573	-1.07162	-1.20689	-0.920279	-1.05687	-1.0304	-0.999281	-1.05687	-0.998619	-0.9233	-1.19452	-1.19285	PF3D7_1442400	582	S	___1	NNILLNNINNNS(1)FEK	12	NINKNNILLNNINNNSFEKRNEKVYIKQRRM	PF14_0402
PF3D7_0614800	NTHL1	endonuclease III homologue, putative	No	0.41731	-0.004992	0.08803	0.080876	-0.229549	-0.068371	-0.196489	-1.50215	-1.08484	-0.549509	-0.554501	-0.856129	-0.768099	-0.814625	-0.733749	-0.816851	-1.0464	-0.63711	-0.705481	-0.739861	-0.93635	PF3D7_0614800	433	S	___1	CQYYQDTS(0.003)T(0.003)KQENKS(0.972)NEY(0.022)I	15	KCQYYQDTSTKQENKSNEYI___________	2270.t00038;MAL6P1.278;PFF0715c
PF3D7_0401800	PfD80	Plasmodium exported protein (PHISTb), unknown function	Yes	0.41718	0.37829	0.12736	0.51609	0.31987	0.38212	0.09727	1.75076	2.16794	1.51808	1.89637	2.24523	2.37259	1.39537	1.91146	1.53824	1.85811	1.46662	1.84874	1.53391	1.63118	PF3D7_0401800	138	S	___3	SASAAS(0.999)T(0.998)T(0.003)R	6	STASAASTTRSASAASTTRSASAASTTRSAS	MAL4P1.16;PFD0080c
PF3D7_0606100		RNA-binding protein, putative	No	0.41667	0.07223	0.28222	0.58685	0.22153	0.0305	0.26899	-1.64894	-1.23227	-1.57458	-1.50235	-1.93436	-1.65214	-1.94193	-1.35508	-1.82062	-1.59909	-1.80637	-1.77587	-2.06031	-1.79132	PF3D7_0606100	546	S	___1	RDS(0.992)EVS(0.008)KPWWVK	3	SNSSYSERRRRSRRDSEVSKPWWVKESEKMK	2270.t00254;MAL6P1.64;PFF0300w
PF3D7_0309600	PfP2	60S acidic ribosomal protein P2	No	0.41627	-0.18643	0.05881	0.27361	0.22539	-0.24983	-0.10192	-2.48058	-2.06431	-1.04183	-1.22826	-1.4261	-1.36729	-2.01515	-1.74154	-2.22807	-2.00268	-1.48232	-1.73215	-1.65289	-1.75481	PF3D7_0309600	109	S	___1	KEEEEEEEDDLGFS(1)LFG	14	EKKEEEEEEEDDLGFSLFG____________	MAL3P3.19;PFC0400w
PF3D7_1473700	NUP116	nucleoporin NUP116/NSP116, putative	No	0.41608	-0.00574	-0.09405	0.26895	-0.00521	0.01667	0.01848	-2.36672	-1.95064	-2.28085	-2.28659	-2.41902	-2.51307	-2.65374	-2.38479	-2.75862	-2.76383	-2.41689	-2.40022	-2.46386	-2.44538	PF3D7_1473700	214	T	___2	NCLVFEFPIIHNT(0.613)EEDS(0.613)T(0.613)EEDNT(0.161)EEQNK	13	EGKNCLVFEFPIIHNTEEDSTEEDNTEEQNK	PF14_0706
PF3D7_1344800	ATCase	aspartate carbamoyltransferase	No	0.415975	0.489538	0.06109	0.527437	0.296539	0.42359	0.36122	-0.139425	0.27655	-0.044239	0.445299	0.259291	0.320381	0.116024	0.643461	0.169331	0.46587	-0.02952	0.39407	0.14986	0.51108	PF3D7_1344800	110	T	___1	VFCSVFLEPS(0.144)T(0.144)RT(0.711)R	13	ENKVFCSVFLEPSTRTRCSFDAAILKLGSKV	MAL13P1.221;PF13_0240
PF3D7_0206300	AROM	pentafunctional AROM polypeptide, putative, pseudogene	No	0.415665	0.123028	0.171049	0.183247	0.144011	0.357769	-0.036279	-0.420435	-0.00477028	-0.23564	-0.112612	-0.420969	-0.24992	-0.353226	-0.169979	-0.109211	0.0347996	-0.529789	-0.17202	-0.169821	-0.2061	PF3D7_0206300	900	S	___1	VYS(1)EEMEKIDDEK	3	DKYIDNIINIQKKVYSEEMEKIDDEKRFTSV	PF02_0059;PF02_0060;PF3D7_0206400;PFB0279w;PFB0280w
PF3D7_0302500	CLAG3.1	cytoadherence linked asexual protein 3.1	Yes	0.41492	0.18003	0.08889	0.18571	0.20711	0.14416	0.13721	1.61231	2.02723	1.77249	1.95252	1.90826	1.99715	2.01138	2.19709	1.86688	2.07399	2.10354	2.2477	1.87532	2.01253	PF3D7_0302500;PF3D7_0302200	1382;1381	S	___1	KQT(0.1)S(0.87)T(0.031)YIDTEK	4	GDKNTNKTTEIKKQTSTYIDTEKMNEADSAD	MAL3P1.5;PFC0120w
PF3D7_1467600		conserved Plasmodium protein, unknown function	No	0.414781	0.490008	0.48966	0.2449	0.2961	0.18221	0.0584	-1.23504	-0.820259	-1.47083	-0.980822	-1.34193	-0.85227	-1.19072	-0.94582	-1.40851	-1.11241	-1.46192	-1.27971	-1.27683	-1.21843	PF3D7_1467600	1500	S	___2	QLES(0.01)CES(0.908)NS(0.11)CVANS(0.972)VQDIR	7	MDESQFYLKQLESCESNSCVANSVQDIRNAS	PF14_0644
PF3D7_1467600		conserved Plasmodium protein, unknown function	No	0.414781	0.490008	0.48966	0.2449	0.2961	0.18221	0.0584	-1.23504	-0.820259	-1.47083	-0.980822	-1.34193	-0.85227	-1.19072	-0.94582	-1.40851	-1.11241	-1.46192	-1.27971	-1.27683	-1.21843	PF3D7_1467600	1507	S	___2	QLESCESNSCVANS(1)VQDIR	14	LKQLESCESNSCVANSVQDIRNASSENEKDI	PF14_0644
PF3D7_0202000	KAHRP	erythrocyte membrane protein 1, PfEMP1	Yes	0.41453	-0.2281	-0.26348	0.20158	0.14778	0.0587	-0.312189	1.8084	2.22293	1.81187	1.58377	2.09371	1.83023	2.01958	2.22116	1.92943	2.07721	1.23663	1.29533	0.83894	0.526751	PF3D7_0202000;PF3D7_1255200	549;1773	T	___1	EAS(0.178)T(0.54)S(0.262)KEAT(0.02)K	4	CAAEGATKGATKEASTSKEATKEASTSKEAT	PF02_0020;PFB0100c
PF3D7_0510100		conserved Plasmodium protein, unknown function	No	0.41412	0.06889	0.69239	0.31579	0.27253	-0.03361	-0.26705	-3.18338	-2.76926	-3.32959	-3.2607	-3.6804	-2.98801	-3.31221	-2.99642	-3.29085	-3.01832	-3.41518	-3.44879	-3.2042	-3.47125	PF3D7_0510100	83	S	___2	LLVEGNS(0.666)S(0.666)DT(0.666)FVDSSIGFK	7	VRNIPNDEKLLVEGNSSDTFVDSSIGFKHMY	MAL5P1.102;PFE0500c
PF3D7_0510100		conserved Plasmodium protein, unknown function	No	0.41412	0.06889	0.69239	0.31579	0.27253	-0.03361	-0.26705	-3.18338	-2.76926	-3.32959	-3.2607	-3.6804	-2.98801	-3.31221	-2.99642	-3.29085	-3.01832	-3.41518	-3.44879	-3.2042	-3.47125	PF3D7_0510100	84	S	___2	LLVEGNS(0.027)S(0.968)DT(0.005)FVDSSIGFK	8	RNIPNDEKLLVEGNSSDTFVDSSIGFKHMYI	MAL5P1.102;PFE0500c
PF3D7_0510100		conserved Plasmodium protein, unknown function	No	0.41412	0.06889	0.69239	0.31579	0.27253	-0.03361	-0.26705	-3.18338	-2.76926	-3.32959	-3.2607	-3.6804	-2.98801	-3.31221	-2.99642	-3.29085	-3.01832	-3.41518	-3.44879	-3.2042	-3.47125	PF3D7_0510100	86	T	___2	LLVEGNS(0.666)S(0.666)DT(0.666)FVDSSIGFK	10	IPNDEKLLVEGNSSDTFVDSSIGFKHMYINN	MAL5P1.102;PFE0500c
PF3D7_1036900		conserved Plasmodium protein, unknown function	No	0.41375	0.35477	0.42923	0.48093	0.31217	0.33628	0.07221	2.34366	2.75741	2.5378	2.89257	2.41276	2.84199	2.29622	2.77715	2.3543	2.66647	2.42814	2.76442	2.49787	2.57008	PF3D7_1036900	541	T	___3	LNYDMT(0.02)T(0.98)IT(1)EET(1)NEFDHDVNK	9	DPYTGQKLNYDMTTITEETNEFDHDVNKKVI	PF10_0361
PF3D7_1036900		conserved Plasmodium protein, unknown function	No	0.41375	0.35477	0.42923	0.48093	0.31217	0.33628	0.07221	2.34366	2.75741	2.5378	2.89257	2.41276	2.84199	2.29622	2.77715	2.3543	2.66647	2.42814	2.76442	2.49787	2.57008	PF3D7_1036900	544	T	___3	LNYDMT(0.02)T(0.98)IT(1)EET(1)NEFDHDVNK	12	TGQKLNYDMTTITEETNEFDHDVNKKVIENT	PF10_0361
PF3D7_0323700	SART1	U4/U6.U5 tri-snRNP-associated protein 1, putative	No	0.413627	0.375179	0.277109	0.533405	0.27907	0.51944	0.080801	-0.538286	-0.124659	-0.76676	-0.391581	-0.620689	-0.34358	-0.540035	-0.00662994	-0.555851	-0.276781	-0.61644	-0.0970001	-0.57489	-0.494089	PF3D7_0323700	116	S	___2	LEQDELKYS(1)DDENEEQSYNK	9	RNTMNQRLEQDELKYSDDENEEQSYNKKNKK	MAL3P7.43;PFC1060c
PF3D7_0323700	SART1	U4/U6.U5 tri-snRNP-associated protein 1, putative	No	0.413627	0.375179	0.277109	0.533405	0.27907	0.51944	0.080801	-0.538286	-0.124659	-0.76676	-0.391581	-0.620689	-0.34358	-0.540035	-0.00662994	-0.555851	-0.276781	-0.61644	-0.0970001	-0.57489	-0.494089	PF3D7_0323700	124	S	___2	LEQDELKY(0.072)S(0.934)DDENEEQS(0.98)Y(0.014)NK	17	EQDELKYSDDENEEQSYNKKNKKKKKKNSND	MAL3P7.43;PFC1060c
PF3D7_0503500		protein kinase, putative	No	0.41346	0.008159	-0.09919	0.39754	0.579879	0.49989	0.08717	-1.19669	-0.78323	-0.99703	-0.988871	-1.39608	-1.49527	-1.12411	-0.72657	-1.49064	-0.910761	-1.64285	-1.14296	-1.39808	-1.31091	PF3D7_0503500	841	T	___1	INMDIDNFFDEFDLS(0.01)KENNT(0.99)PK	20	IDNFFDEFDLSKENNTPKVKLSSLQ______	MAL5P1.35;PFE0170c
PF3D7_0716100	SDA1	protein SDA1, putative	No	0.413296	0.280859	0.053511	0.089416	0.31591	0.02951	-0.144782	-0.737335	-0.324039	-0.361629	-0.0807705	-0.248671	-0.19516	-0.236225	-0.146809	-0.39747	-0.0815601	-0.226669	-0.197159	-0.328279	-0.473061	PF3D7_0716100	109	S	___2	NMFTSEYDFEFS(1)DIET(1)DDDLKSENNK	12	GDNKNMFTSEYDFEFSDIETDDDLKSENNKS	PF07_0067
PF3D7_0716100	SDA1	protein SDA1, putative	No	0.413296	0.280859	0.053511	0.089416	0.31591	0.02951	-0.144782	-0.737335	-0.324039	-0.361629	-0.0807705	-0.248671	-0.19516	-0.236225	-0.146809	-0.39747	-0.0815601	-0.226669	-0.197159	-0.328279	-0.473061	PF3D7_0716100	113	T	___2	NMFTSEYDFEFS(1)DIET(1)DDDLKSENNK	16	NMFTSEYDFEFSDIETDDDLKSENNKSDDFN	PF07_0067
PF3D7_0805400		acetyltransferase, putative	No	0.4131	0.21739	-0.08018	-0.10989	-0.18744	0.03005	-0.03336	-2.75776	-2.34466	-2.03886	-1.82147	-2.28613	-2.36631	-2.51939	-2.62928	-2.76036	-2.9478	-2.86539	-2.83534	-2.50427	-2.53763	PF3D7_0805400	29	S	___1	VENYINPFVLADIS(1)DLDFEK	14	NKVENYINPFVLADISDLDFEKSIEKSFECN	MAL8P1.200
PF3D7_0220600		Plasmodium exported protein (hyp9), unknown function	Yes	0.412867	0.31074	0.0924797	0.012556	0.15892	0.18092	0.0645008	-0.262236	0.150631	0.26741	0.57815	0.0883713	0.180851	0.321785	0.334341	0.0525799	0.2115	-0.588869	-0.407949	0.0162697	0.0807705	PF3D7_0220600	130	S	___1	VNATS(0.001)ENMS(0.998)VGQWDYIMQYYGQSTPK	9	IPPDMIKVNATSENMSVGQWDYIMQYYGQST	PF02_0193;PFB0930w
PF3D7_0401800	PfD80	Plasmodium exported protein (PHISTb), unknown function	Yes	0.4128	0.47517	0.58154	0.5051	0.63679	0.71112	0.41069	2.62965	3.04245	1.99949	2.47466	1.36557	1.94711	1.87676	2.38186	2.05418	2.69097	1.68474	2.39586	1.6735	2.08419	PF3D7_0401800	327	S	___1	EGNES(1)DNIYCMLCSSNTR	5	KEAESVDDNNKEGNESDNIYCMLCSSNTRGF	MAL4P1.16;PFD0080c
PF3D7_1436300	PTEX150	translocon component PTEX150	No	0.412694	0.39869	0.546391	0.484017	0.198689	0.49137	0.036591	-0.163404	0.24929	-0.77702	-0.37833	-1.04366	-0.497269	-0.471985	0.0120316	-1.12263	-0.923941	-0.998999	-0.507629	-0.82675	-0.790159	PF3D7_1436300	243	S	___1	DNLQSFLS(0.009)S(0.988)LT(0.002)GNK	9	IGKMMNKDNLQSFLSSLTGNKDGSGKNPLSD	PF14_0344;Pf112
PF3D7_0401800	PfD80	Plasmodium exported protein (PHISTb), unknown function	Yes	0.41212	0.23828	0.10336	0.342	0.36461	0.51831	0.15452	2.894	3.30612	2.66121	2.89949	3.16357	3.26693	2.60813	2.95013	2.47044	2.83505	2.20017	2.71848	2.40738	2.5619	PF3D7_0401800	82	S	___1	SPSTASTSTS(1)LR	10	ASTTKRSPSTASTSTSLRSASTASTASTLRS	MAL4P1.16;PFD0080c
PF3D7_0609700	KIC6	conserved Plasmodium protein, unknown function	No	0.41126	0.24914	-0.1057	0.37962	0.36044	-0.10841	0.10047	-2.55076	-2.1395	-2.33059	-2.08145	-2.08552	-2.19122	-2.19547	-1.81585	-2.72353	-2.36309	-2.25964	-2.36805	-2.45791	-2.35744	PF3D7_0609700	22	S	___1	KS(0.164)LNS(0.764)PHNNNNDNY(0.05)NNNY(0.009)T(0.01)Y(0.002)DENSLVK	5	KNSFLLQSYFKKSLNSPHNNNNDNYNNNYTY	2270.t00217;MAL6P1.100;PFF0480w
PF3D7_0500800	MESA	mature parasite-infected erythrocyte surface antigen	Yes	0.411246	0.385959	0.15674	0.559825	0.340219	0.475609	0.361271	0.692924	1.10417	0.44232	0.828279	-0.16576	-0.00901985	0.828285	1.38811	0.547581	0.8878	0.507601	0.98321	0.47357	0.834841	PF3D7_0500800	348	S	___1	VSGPYENS(0.995)ENS(0.005)NVTSESEETK	8	SKDREGNKVSGPYENSENSNVTSESEETKKL	MAL5P1.9;PFE0040c
PF3D7_1433500	TOP2	DNA topoisomerase 2	No	0.41105	0.59638	-0.08524	-0.16896	0.3369	0.22458	-0.26239	-3.84329	-3.43224	-3.61301	-3.01663	-3.22251	-3.30775	-3.36592	-3.53488	-3.44951	-3.11261	-3.6069	-3.38232	-3.25718	-3.51957	PF3D7_1433500	1235	S	___1	LS(0.868)S(0.132)DEESEGGDISDSSEFLVNTLNIK	2	QGPSSMKKKKKKKKLSSDEESEGGDISDSSE	PF14_0316
PF3D7_0627700		transportin	No	0.410906	0.02756	-0.03777	0.05706	0.00972	-0.11139	0.02129	0.346855	0.757761	1.14116	1.16872	1.16024	1.12247	1.31163	1.36869	1.1859	1.19562	1.51893	1.40754	1.46272	1.48401	PF3D7_0627700	326	S	___1	SDINKS(0.005)DS(0.995)NYIDENVYK	8	YASYNNPKSDINKSDSNYIDENVYKNINELR	2270.t00164;MAL6P1.151;PFF1345w
PF3D7_1036900		conserved Plasmodium protein, unknown function	No	0.41067	0.35054	0.46466	0.44898	0.30746	0.29469	0.08143	1.5729	1.98357	1.84753	2.19807	1.67553	2.14019	1.58876	2.03774	1.65868	1.96614	1.77092	2.06561	1.80159	1.88302	PF3D7_1036900	538	T	___3	LNY(0.007)DMT(0.722)T(0.635)IT(0.635)EET(0.001)NEFDHDVNKK	6	LEYDPYTGQKLNYDMTTITEETNEFDHDVNK	PF10_0361
PF3D7_1004400		RNA-binding protein, putative	No	0.41045	0.16227	0.27372	0.44869	0.28606	0.30677	0.04332	1.57466	1.98511	1.81512	1.97739	1.52088	1.7946	1.57075	2.01944	1.58105	1.86711	1.41359	1.72036	1.67993	1.72325	PF3D7_1004400	785	T	___3	NEEEGYDDDT(1)YT(0.643)S(0.357)ERDK	10	FLVDKKNEEEGYDDDTYTSERDKSMNEKIMK	PF10_0047
PF3D7_0730900	PTP4	EMP1-trafficking protein	Yes	0.410256	0.26222	0.138639	0.353555	0.275429	0.22537	0.114221	0.626734	1.03699	1.08745	1.34967	-0.351379	-0.21274	0.859505	1.21306	0.61832	0.893749	0.9387	1.16407	0.724579	0.8388	PF3D7_0730900	2098	S	___1	GVNVQS(0.026)S(0.958)NT(0.016)NK	7	LGKHKHHEKGVNVQSSNTNKHMPRKMLR___	MAL7P1.171
PF3D7_0320000	I2	protein phosphatase inhibitor 2	No	0.409966	-0.060932	-0.24007	0.015625	0.137108	0.225901	-0.126872	-0.883286	-0.47332	-0.16581	-0.226742	-0.555689	-0.795759	-0.513914	-0.498289	-0.472059	-0.334951	-0.98053	-0.754629	-0.359159	-0.486031	PF3D7_0320000	50	S	___1	ILEPNTPFNFILMDS(0.999)AS(0.997)EDEAS(0.003)K	17	LEPNTPFNFILMDSASEDEASKYGDVKGSDE	PFC0886w
PF3D7_0305500		conserved Plasmodium protein, unknown function	No	0.40961	-0.02281	0.11842	-0.09886	0.04463	0.09463	0.1402	-2.23779	-1.82818	-1.82033	-1.84314	-1.99591	-1.87749	-1.90096	-1.99982	-1.8235	-1.77887	-1.96617	-1.87154	-2.13517	-1.99497	PF3D7_0305500	3702	S	___1	RS(0.529)VHFY(0.47)PQHLDGNTLK	2	ENNSVKIIDVDERKRSVHFYPQHLDGNTLKK	MAL3P2.18;PFC0245c
PF3D7_1033600	CEF1	myb2 transcription factor, putative	No	0.4096	-0.25834	0.02779	0.16074	-0.24177	-0.30815	0.19063	-2.08609	-1.67649	-1.70755	-1.96589	-1.86674	-1.83895	-1.62877	-1.46803	-1.96568	-2.20745	-1.48879	-1.79694	-1.99285	-1.80222	PF3D7_1033600	522	S	___1	NIS(0.002)LYAHS(0.998)IIS(1)YK	8	SDIKSFKKNISLYAHSIISYKNLKNDQSMMD	PF10_0327
PF3D7_1022000		RNA-binding protein, putative	No	0.40931	0.20506	0.32795	0.45957	0.14945	0.20108	0.13994	1.90628	2.31559	1.65155	1.85661	1.60601	1.93396	1.66073	2.1203	1.76695	1.9164	1.64559	1.84667	1.6988	1.83874	PF3D7_1022000	1063	T	___1	IRNET(1)PSSFNEK	5	TEKNIELTINRIRNETPSSFNEKTKNISSFL	PF10_0214
PF3D7_0905400	RhopH3	high molecular weight rhoptry protein 3	Yes	0.408747	0.448489	0.32823	0.464716	0.362358	0.54394	0.363181	-0.280066	0.128681	-0.348429	0.10006	-0.538109	-0.209879	-0.0856152	0.379101	-0.366489	-0.00413132	-0.608759	-0.0648193	-0.628981	-0.2658	PF3D7_0905400	791	S	___1	YMGPLKEQS(1)K	9	LEIELYKYMGPLKEQSKSTSAASTSDEISGS	PFI0265c
PF3D7_0408500	FEN1	flap endonuclease 1	No	0.40861	-0.269381	-0.005	0.0325	0.4894	-0.12871	-0.00258	-1.59503	-1.18642	-0.950649	-1.22003	-1.71682	-1.72182	-1.57418	-1.54168	-1.66778	-1.17838	-1.95197	-2.08068	-1.45941	-1.46199	PF3D7_0408500	492	S	___3	S(0.996)LDNFS(0.007)S(0.014)NLFDS(0.979)DKES(0.833)ES(0.171)GNIIK	1	EKNKDDEKNKDDEKKSLDNFSSNLFDSDKES	MAL4P2.21;PFD0420c
PF3D7_0408500	FEN1	flap endonuclease 1	No	0.40861	-0.269381	-0.005	0.0325	0.4894	-0.12871	-0.00258	-1.59503	-1.18642	-0.950649	-1.22003	-1.71682	-1.72182	-1.57418	-1.54168	-1.66778	-1.17838	-1.95197	-2.08068	-1.45941	-1.46199	PF3D7_0408500	503	S	___3	SLDNFSSNLFDS(1)DKES(0.999)ES(0.001)GNIIK	12	DEKKSLDNFSSNLFDSDKESESGNIIKNEKQ	MAL4P2.21;PFD0420c
PF3D7_0408500	FEN1	flap endonuclease 1	No	0.40861	-0.269381	-0.005	0.0325	0.4894	-0.12871	-0.00258	-1.59503	-1.18642	-0.950649	-1.22003	-1.71682	-1.72182	-1.57418	-1.54168	-1.66778	-1.17838	-1.95197	-2.08068	-1.45941	-1.46199	PF3D7_0408500	507	S	___3	SLDNFSSNLFDS(1)DKES(1)ESGNIIK	16	SLDNFSSNLFDSDKESESGNIIKNEKQNMDD	MAL4P2.21;PFD0420c
PF3D7_0301700		Plasmodium exported protein, unknown function	Yes	0.40849	0.32302	0.29827	0.5538	0.26196	0.20821	0.21301	4.74764	5.15613	4.61788	4.9409	4.84135	5.13962	4.70209	5.25589	4.95915	5.22111	4.61594	4.82415	4.95912	5.17213	PF3D7_0301700	152	S	___1	VTVLEPQT(1)ENS(1)EDEENYEK	11	NSTPRVTVLEPQTENSEDEENYEKTIVDELN	MAL3P8.15;PFC0085c
PF3D7_1444800	FBPA	fructose-bisphosphate aldolase	No	0.40834	0.13496	0.25032	0.307	0.17576	0.32189	0.04513	1.24895	1.65729	1.28721	1.42217	1.16293	1.41325	1.24748	1.55448	1.20024	1.376	1.05529	1.37718	1.26149	1.30662	PF3D7_1444800	129	S	___1	GLVNIPCTDEEKS(0.907)T(0.093)QGLDGLAER	13	VDKGLVNIPCTDEEKSTQGLDGLAERCKEYY	PF14_0425
PF3D7_1107300	PAIP1	polyadenylate-binding protein-interacting protein 1, putative	No	0.40829	0.10028	-0.04457	0.09724	0.09474	-0.055	-0.02281	1.47941	1.8877	1.54996	1.65024	1.75144	1.70687	1.59084	1.68808	1.42382	1.51856	1.72983	1.67483	1.46107	1.43826	PF3D7_1107300	2299	S	___1	NDNKLEKS(1)S(1)DEHMNEK	9	ICEKNEKNDNKLEKSSDEHMNEKISDNVKVN	PF11_0086
PF3D7_1408200	ApiAP2	AP2 domain transcription factor AP2-G2, putative	No	0.408106	0.122078	0.11729	0.388206	0.064219	0.119261	0.150211	-0.423155	-0.015049	-0.439999	-0.317921	-0.479389	-0.362099	-0.332355	0.055851	-0.25359	-0.189371	-0.49493	-0.375669	-0.458641	-0.30843	PF3D7_1408200	915	S	___1	KENS(0.01)S(0.06)IS(0.93)K	7	NNDNNYVERKENSSISKILDEKNNLSNNDPI	PF14_0079
PF3D7_1036900		conserved Plasmodium protein, unknown function	No	0.407446	0.212818	0.28841	0.588026	0.39604	0.37728	0.379071	0.373695	0.781141	0.305231	0.518049	0.274731	0.563141	0.107306	0.695332	0.26939	0.66543	-0.0211487	0.356131	0.19721	0.576281	PF3D7_1036900	658	S	___2	EET(1)LRS(1)PK	6	TNGTQNNNEKEETLRSPKKDANSNKELKNEK	PF10_0361
PF3D7_1036900		conserved Plasmodium protein, unknown function	No	0.407446	0.212818	0.28841	0.588026	0.39604	0.37728	0.379071	0.373695	0.781141	0.305231	0.518049	0.274731	0.563141	0.107306	0.695332	0.26939	0.66543	-0.0211487	0.356131	0.19721	0.576281	PF3D7_1036900	655	T	___2	EET(1)LRS(1)PK	3	SVITNGTQNNNEKEETLRSPKKDANSNKELK	PF10_0361
PF3D7_0501400	FIRA	interspersed repeat antigen	Yes	0.407417	-0.146352	0.009859	0.185695	0.28735	0.02009	-0.095299	-0.164356	0.243061	-0.225859	-0.372211	-0.235359	-0.2255	-0.0677242	0.117971	-0.0935307	0.193819	-0.87615	-0.85606	-0.24691	-0.342209	PF3D7_0501400	1666	S	___1	S(1)WMSFGK	1	ATKDAPTSSANKKSRSWMSFGKGDKSDKKNK	MAL5P1.15;PFE0070w
PF3D7_0627100		ankyrin-repeat protein, putative	No	0.40727	-0.25279	0.17524	0.73015	-0.16848	0.06825	0.23799	-1.88979	-1.48252	-1.31236	-1.56515	-1.45456	-1.27932	-1.74887	-1.01872	-1.60329	-1.77177	-1.29	-1.22175	-1.86966	-1.63167	PF3D7_0627100	615	S	___1	IQNNVS(1)VKEANLK	6	TFKHFGYSTKIQNNVSVKEANLKIANKKEQE	2270.t00158;MAL6P1.157;PFF1315w
PF3D7_0918900	gammaGCS	gamma-glutamylcysteine synthetase	No	0.40669	0.05653	0.05122	0.27714	0.21698	0.17538	0.01035	3.12493	3.53162	2.91424	2.97077	2.8674	2.91862	2.96917	3.24631	2.96365	3.18063	2.70385	2.87923	3.00101	3.01136	PF3D7_0918900	1047	S	___2	TIYEES(1)MDNTVEFAK	6	DQDYCTCTRRTIYEESMDNTVEFAKKMYELS	PFI0925w
PF3D7_1253100		Plasmodium exported protein (PHISTa), unknown function	Yes	0.40651	0.27888	0.28609	0.44508	0.3462	0.23929	0.22224	1.06949	1.476	1.167	1.44588	1.44986	1.73595	1.47042	1.9155	1.19763	1.54383	1.62561	1.8649	1.19779	1.42003	PF3D7_1253100	286	S	___1	DT(0.035)LS(0.965)LK	4	KLINNFCNKYKKDTLSLK_____________	2277.t00509;MAL12P1.506;PFL2555w
PF3D7_1033200	ETRAMP10.2	early transcribed membrane protein 10.2	Yes	0.406316	0.08064	0.56706	0.50061	0.09799	0.23309	0.23375	0.815674	1.22199	2.41677	2.49741	2.17575	2.74281	2.09085	2.59146	1.682	1.77999	2.64779	2.88088	-1.71077	-1.47702	PF3D7_1033200	195	S	___1	LAS(0.5)FS(0.5)LYDALADASEQNKNK	5	DSFKNINEPRKLASFSLYDALADASEQNKNK	PF10_0323
PF3D7_1036900		conserved Plasmodium protein, unknown function	No	0.40599	0.37546	0.43192	0.48549	0.28094	0.35371	0.06128	2.24899	2.65498	2.4195	2.79496	2.31033	2.74225	2.19535	2.68084	2.27187	2.55281	2.29682	2.65053	2.39889	2.46017	PF3D7_1036900	539	T	___3	LNYDMT(0.02)T(0.98)IT(1)EET(1)NEFDHDVNK	7	EYDPYTGQKLNYDMTTITEETNEFDHDVNKK	PF10_0361
PF3D7_0730900	PTP4	EMP1-trafficking protein	Yes	0.405925	0.132887	0.07646	0.196205	0.145539	-0.58203	0.43086	-0.851505	-0.44558	-0.581959	-0.449072	-0.73213	-0.65567	-0.748215	-0.55201	-1.04733	-0.901791	-2.05804	-2.64007	-0.9538	-0.52294	PF3D7_0730900	400	S	___1	VNTTNNAPNEIKS(0.969)NT(0.027)Y(0.004)DDMNNK	13	NNKVNTTNNAPNEIKSNTYDDMNNKVNTTNN	MAL7P1.171
PF3D7_0822900		conserved Plasmodium protein, unknown function	No	0.405886	-0.062431	0.183869	0.148054	-0.230741	-0.12388	-0.139538	0.155094	0.56098	0.671631	0.6092	0.836451	1.02032	0.771786	0.91984	0.76683	0.536089	1.14884	1.02496	0.865469	0.725931	PF3D7_0822900	421	S	___1	GNNSECGNIVEEQNNGDS(1)LDERKEK	18	NSECGNIVEEQNNGDSLDERKEKNMKSAIRF	PF08_0035
PF3D7_1449400	MUS81	crossover junction endonuclease MUS81, putative	No	0.40518	0.05526	-0.37281	-0.06469	0.46053	-0.28581	-0.09628	-1.98723	-1.58205	-1.94785	-1.89259	-1.95451	-2.32732	-1.98528	-2.04997	-2.45153	-1.991	-2.1374	-2.42321	-2.06406	-2.16034	PF3D7_1449400	340	S	___2	EEES(1)MLHT(1)ENVK	4	NTENIYQLNNTKEEESMLHTENVKNMISQYS	PF14_0470
PF3D7_1449400	MUS81	crossover junction endonuclease MUS81, putative	No	0.40518	0.05526	-0.37281	-0.06469	0.46053	-0.28581	-0.09628	-1.98723	-1.58205	-1.94785	-1.89259	-1.95451	-2.32732	-1.98528	-2.04997	-2.45153	-1.991	-2.1374	-2.42321	-2.06406	-2.16034	PF3D7_1449400	344	T	___2	EEES(1)MLHT(1)ENVK	8	IYQLNNTKEEESMLHTENVKNMISQYSFNTD	PF14_0470
PF3D7_0201800	KAHsp40	knob associated heat shock protein 40	Yes	0.404936	0.600908	0.6008	0.553715	0.620249	0.595609	0.379011	-0.408636	-0.00370026	-0.1502	0.450708	-0.39975	0.20105	-0.597565	-0.0438499	-0.468229	0.15202	-0.191299	0.40431	-0.78771	-0.408699	PF3D7_0201800	144	S	___1	SISEAYEVLS(1)DEEK	10	ADNMFKSISEAYEVLSDEEKRDIYDKYGEEG	PF02_0018;PFB0090c
PF3D7_1107300	PAIP1	polyadenylate-binding protein-interacting protein 1, putative	No	0.404365	-0.006832	-0.0345783	0.428585	0.163109	-0.13381	-0.0800686	-0.132484	0.271881	0.496731	0.489899	0.0980797	0.0635014	-0.029335	0.39925	-0.0614891	0.10162	0.18284	0.0490303	0.0510292	-0.0290394	PF3D7_1107300	1715	S	___2	SIDALTENENNKNDAECS(1)DSTTVK	18	DALTENENNKNDAECSDSTTVKNKKGKRTST	PF11_0086
PF3D7_1107300	PAIP1	polyadenylate-binding protein-interacting protein 1, putative	No	0.404365	-0.006832	-0.0345783	0.428585	0.163109	-0.13381	-0.0800686	-0.132484	0.271881	0.496731	0.489899	0.0980797	0.0635014	-0.029335	0.39925	-0.0614891	0.10162	0.18284	0.0490303	0.0510292	-0.0290394	PF3D7_1107300	1717	S	___2	NDAECS(0.067)DS(0.72)T(0.188)T(0.025)VK	8	LTENENNKNDAECSDSTTVKNKKGKRTSTNN	PF11_0086
PF3D7_1107300	PAIP1	polyadenylate-binding protein-interacting protein 1, putative	No	0.404365	-0.006832	-0.0345783	0.428585	0.163109	-0.13381	-0.0800686	-0.132484	0.271881	0.496731	0.489899	0.0980797	0.0635014	-0.029335	0.39925	-0.0614891	0.10162	0.18284	0.0490303	0.0510292	-0.0290394	PF3D7_1107300	1718	T	___2	SIDALT(0.003)ENENNKNDAECS(0.608)DS(0.608)T(0.608)T(0.173)VK	21	TENENNKNDAECSDSTTVKNKKGKRTSTNNV	PF11_0086
PF3D7_1015600	HSP60	heat shock protein 60	No	0.40413	0.221138	0.06703	0.066227	0.13481	0.024559	0.143862	-1.08628	-0.68215	-0.72954	-0.508402	-0.794609	-0.727579	-0.547226	-0.480999	-0.7043	-0.56949	-0.662849	-0.63829	-0.789131	-0.645269	PF3D7_1015600	75	S	___1	NVIIEQS(0.018)FGS(0.982)PK	10	LGPKGRNVIIEQSFGSPKITKDGVTVAKSIE	PF10_0153
PF3D7_0815800	VPS9	vacuolar protein sorting-associated protein 9, putative	No	0.403856	0.150829	0.25377	0.450285	0.10668	-0.0243	0.255661	-0.583946	-0.18009	-0.43243	-0.281601	-0.388639	-0.134869	-0.468575	-0.0182896	-0.248421	-0.141741	-0.26301	-0.28731	-0.469101	-0.21344	PF3D7_0815800	375	S	___1	RES(1)NS(1)IEYFDK	5	KEKKNNRELDKRESNSIEYFDKINIRDKKKI	MAL8P1.82
PF3D7_1302000	PTP6	EMP1-trafficking protein	Yes	0.40353	0.58746	0.04748	0.64805	0.07289	0.20324	0.16123	-2.24005	-1.83652	-2.68603	-2.09857	-2.25695	-2.20947	-2.84338	-2.19533	-1.82134	-1.74845	-2.02122	-1.81798	-3.12021	-2.95898	PF3D7_1302000	302	S	___1	DTNDNT(0.004)T(0.113)NNKS(0.812)AT(0.072)K	11	KNIKKDTNDNTTNNKSATKTNVTKTS_____	PF13_0076
PF3D7_1339300		conserved Plasmodium protein, unknown function	No	0.40272	0.216207	0.20659	0.535102	0.448009	0.02537	-0.2851	-1.15491	-0.75219	-0.962299	-0.746092	-0.92164	-0.71505	-1.23536	-0.700258	-1.38729	-0.939281	-1.02574	-1.00037	-1.07717	-1.36227	PF3D7_1339300	243	S	___2	T(0.003)EY(0.001)AS(0.966)DIAS(0.815)NADMNT(0.062)AEDY(0.147)DMT(0.006)NGSINEDGQGK	9	KVSKNSKTEYASDIASNADMNTAEDYDMTNG	PF13_0215
PF3D7_1346400		conserved Plasmodium protein, unknown function	No	0.40268	-0.15555	0.14061	0.32541	-0.06579	0.20427	-0.13376	-1.20381	-0.80113	-1.0959	-1.25145	-1.01919	-0.87858	-1.38852	-1.06311	-1.18191	-1.2477	-1.23824	-1.03397	-1.14963	-1.28339	PF3D7_1346400	3944	S	___1	GNDNINGNHS(0.395)DRES(0.605)EK	14	VKGNDNINGNHSDRESEKRQDMNQNNVNENI	MAL13P1.234
PF3D7_1410400	RAP1	rhoptry-associated protein 1	No	0.4021	0.06715	-0.08009	-0.26693	0.43046	-0.05712	-0.12677	-2.12714	-1.72504	-1.47045	-1.4033	-1.90036	-1.98045	-1.84486	-2.11179	-1.82199	-1.39153	-1.86736	-1.92448	-2.04294	-2.16971	PF3D7_1410400	104	S	___1	S(0.876)AS(0.124)AAAILEEDDSKDDMEFK	1	SNKSSKKGHGRSRVRSASAAAILEEDDSKDD	PF14_0102
PF3D7_1319300	TRM1	tRNA (guanine(26)-N(2))-dimethyltransferase, putative	No	0.40168	-1.06644	0.04075	0.57677	-1.05028	0.40042	-0.46869	-4.94659	-4.54491	-4.28628	-5.35272	-4.35032	-4.30957	-4.73324	-4.15647	-3.79719	-4.84747	-4.40869	-4.00827	-4.24592	-4.71461	PF3D7_1319300	235	S	___3	HNPLENVIEHDS(0.784)DS(0.784)T(0.784)T(0.784)FLS(0.784)NDDEIIT(0.04)T(0.04)K	12	NRRKHNPLENVIEHDSDSTTFLSNDDEIITT	PF13_0109
PF3D7_1319300	TRM1	tRNA (guanine(26)-N(2))-dimethyltransferase, putative	No	0.40168	-1.06644	0.04075	0.57677	-1.05028	0.40042	-0.46869	-4.94659	-4.54491	-4.28628	-5.35272	-4.35032	-4.30957	-4.73324	-4.15647	-3.79719	-4.84747	-4.40869	-4.00827	-4.24592	-4.71461	PF3D7_1319300	237	S	___3	HNPLENVIEHDS(0.784)DS(0.784)T(0.784)T(0.784)FLS(0.784)NDDEIIT(0.04)T(0.04)K	14	RKHNPLENVIEHDSDSTTFLSNDDEIITTKI	PF13_0109
PF3D7_1319300	TRM1	tRNA (guanine(26)-N(2))-dimethyltransferase, putative	No	0.40168	-1.06644	0.04075	0.57677	-1.05028	0.40042	-0.46869	-4.94659	-4.54491	-4.28628	-5.35272	-4.35032	-4.30957	-4.73324	-4.15647	-3.79719	-4.84747	-4.40869	-4.00827	-4.24592	-4.71461	PF3D7_1319300	242	S	___3	HNPLENVIEHDS(0.784)DS(0.784)T(0.784)T(0.784)FLS(0.784)NDDEIIT(0.04)T(0.04)K	19	LENVIEHDSDSTTFLSNDDEIITTKIDNSGE	PF13_0109
PF3D7_1319300	TRM1	tRNA (guanine(26)-N(2))-dimethyltransferase, putative	No	0.40168	-1.06644	0.04075	0.57677	-1.05028	0.40042	-0.46869	-4.94659	-4.54491	-4.28628	-5.35272	-4.35032	-4.30957	-4.73324	-4.15647	-3.79719	-4.84747	-4.40869	-4.00827	-4.24592	-4.71461	PF3D7_1319300	238	T	___3	HNPLENVIEHDS(0.784)DS(0.784)T(0.784)T(0.784)FLS(0.784)NDDEIIT(0.04)T(0.04)K	15	KHNPLENVIEHDSDSTTFLSNDDEIITTKID	PF13_0109
PF3D7_1319300	TRM1	tRNA (guanine(26)-N(2))-dimethyltransferase, putative	No	0.40168	-1.06644	0.04075	0.57677	-1.05028	0.40042	-0.46869	-4.94659	-4.54491	-4.28628	-5.35272	-4.35032	-4.30957	-4.73324	-4.15647	-3.79719	-4.84747	-4.40869	-4.00827	-4.24592	-4.71461	PF3D7_1319300	239	T	___3	HNPLENVIEHDS(0.784)DS(0.784)T(0.784)T(0.784)FLS(0.784)NDDEIIT(0.04)T(0.04)K	16	HNPLENVIEHDSDSTTFLSNDDEIITTKIDN	PF13_0109
PF3D7_0202000	KAHRP	knob-associated histidine-rich protein	Yes	0.401535	0.164787	0.508451	0.427126	0.29819	0.17415	-0.155588	0.434645	0.83618	0.0865707	0.251358	0.751329	1.25978	0.350334	0.77746	0.263969	0.562159	0.41947	0.59362	-0.151941	-0.307529	PF3D7_0202000	589	T	___2	EAS(0.997)T(0.993)T(0.01)EGATK	4	TKEASTSKGATKEASTTEGATKGASTTAGST	PF02_0020;PFB0100c
PF3D7_0507800		conserved Plasmodium protein, unknown function	No	0.401	0.32335	0.31114	0.15447	0.65613	0.06247	0.00678	-2.01095	-1.60995	-2.84267	-2.51932	-2.56608	-2.25494	-1.90304	-1.74857	-2.43359	-1.77746	-2.27717	-2.2147	-2.09958	-2.0928	PF3D7_0507800	176	S	___3	TEEICDT(0.002)T(0.01)KS(0.989)DNS(0.999)FLDIDQEHEK	10	NYEQNKTEEICDTTKSDNSFLDIDQEHEKIK	MAL5P1.79;PFE0385w
PF3D7_0507800		conserved Plasmodium protein, unknown function	No	0.401	0.32335	0.31114	0.15447	0.65613	0.06247	0.00678	-2.01095	-1.60995	-2.84267	-2.51932	-2.56608	-2.25494	-1.90304	-1.74857	-2.43359	-1.77746	-2.27717	-2.2147	-2.09958	-2.0928	PF3D7_0507800	179	S	___3	TEEICDT(0.007)T(0.009)KS(0.985)DNS(1)FLDIDQEHEK	13	QNKTEEICDTTKSDNSFLDIDQEHEKIKIGE	MAL5P1.79;PFE0385w
PF3D7_0507800		conserved Plasmodium protein, unknown function	No	0.401	0.32335	0.31114	0.15447	0.65613	0.06247	0.00678	-2.01095	-1.60995	-2.84267	-2.51932	-2.56608	-2.25494	-1.90304	-1.74857	-2.43359	-1.77746	-2.27717	-2.2147	-2.09958	-2.0928	PF3D7_0507800	173	T	___3	T(0.027)EEICDT(0.743)T(0.743)KS(0.743)DNS(0.743)FLDIDQEHEK	7	SNDNYEQNKTEEICDTTKSDNSFLDIDQEHE	MAL5P1.79;PFE0385w
PF3D7_0507800		conserved Plasmodium protein, unknown function	No	0.401	0.32335	0.31114	0.15447	0.65613	0.06247	0.00678	-2.01095	-1.60995	-2.84267	-2.51932	-2.56608	-2.25494	-1.90304	-1.74857	-2.43359	-1.77746	-2.27717	-2.2147	-2.09958	-2.0928	PF3D7_0507800	174	T	___3	T(0.027)EEICDT(0.743)T(0.743)KS(0.743)DNS(0.743)FLDIDQEHEK	8	NDNYEQNKTEEICDTTKSDNSFLDIDQEHEK	MAL5P1.79;PFE0385w
PF3D7_1440800	MFS6	major facilitator superfamily domain-containing protein, putative	No	0.400596	0.25506	0.236051	0.220087	0.340658	0.242661	0.22215	-0.670755	-0.270159	-0.63269	-0.37763	-0.58559	-0.349539	-0.414036	-0.193949	-0.673929	-0.333271	-0.59038	-0.347719	-0.678291	-0.456141	PF3D7_1440800	284	T	___1	AFNEENKT(1)EDNHSILQIK	8	EDSEGNTKAFNEENKTEDNHSILQIKSTEHL	PF14_0387
PF3D7_1200600	VAR2CSA	erythrocyte membrane protein 1, PfEMP1	Yes	0.400475	0.29728	0.262689	0.179667	0.413078	0.36063	0.353871	-0.874575	-0.4741	-0.92684	-0.62956	-0.859699	-0.59701	-0.417326	-0.237659	-0.968149	-0.555071	-0.205	0.15563	-1.00437	-0.650499	PF3D7_1200600	536	S	___1	VLAS(1)LTNCYK	4	KNQEACEKNLEKVLASLTNCYKCDKCKSEQS	2277.t00006;MAL12P1.6;PFL0030c
PF3D7_0914900		BSD-domain protein, putative	No	0.400465	0.0397778	0.0903914	0.620596	0.37909	0.3848	0.032831	0.00845528	0.40892	-0.0465794	-0.00680161	0.0109196	0.101311	-0.286976	0.33362	-0.47728	-0.0981903	-0.4582	-0.0734005	-0.273861	-0.24103	PF3D7_0914900	561	S	___1	FLDEIS(1)EANRS(1)ACDLEEPK	11	EYNTKFLDEISEANRSACDLEEPKSDFFDSS	PFI0730w
PF3D7_1149000	Pf332	antigen 332, DBL-like protein	Yes	0.400415	0.306398	0.168119	0.424006	-0.06579	0.321841	0.138311	0.381155	0.78157	0.276251	0.582649	0.376421	0.54454	0.389715	0.813721	-1.25476	-1.32055	0.0911903	0.413031	0.35673	0.495041	PF3D7_1149000	4879	S	___1	VSPSEEVIEEQAS(0.924)T(0.067)T(0.009)EEFVEER	13	KEKVSPSEEVIEEQASTTEEFVEERSSTDEI	PF11_0506;PF11_0507
PF3D7_1455700		conserved Plasmodium protein, unknown function	No	0.39994	0.13459	0.04671	0.30894	0.35623	0.25284	-0.03542	-1.75845	-1.35851	-1.26793	-1.13334	-1.4294	-1.38269	-1.43679	-1.12785	-1.71291	-1.35668	-1.49179	-1.23895	-1.51011	-1.54553	PF3D7_1455700	707	T	___1	S(0.075)NT(0.384)T(0.541)PENLYTNNQLFTYSDK	4	KKKEKIMNQLNRSNTTPENLYTNNQLFTYSD	PF14_0531
PF3D7_1140700		conserved Plasmodium protein, unknown function	No	0.3999	0.36528	0.39509	0.49244	0.39648	0.33394	0.16311	1.31723	1.71713	0.93371	1.29899	0.96957	1.36466	1.00615	1.49859	1.06566	1.46214	0.82539	1.15933	1.04798	1.21109	PF3D7_1140700	1000	S	___2	SYS(1)NNS(1)AYVNR	3	GKNIVKNLFCNKKSYSNNSAYVNRGISEYAE	PF11_0418
PF3D7_1011700	RAD23	DNA repair protein RAD23, putative	No	0.399864	0.537039	0.17991	0.252068	0.254829	0.240801	0.423342	0.0957756	0.49564	-0.38109	0.155949	-0.149019	0.0308914	-0.339676	-0.0876083	-0.737619	-0.48279	-0.34078	-0.0999794	-0.477091	-0.0537491	PF3D7_1011700	353	S	___1	LES(1)LGFPK	3	TPLNENEMESIKKLESLGFPKHVALEAFIAC	PF10_0114
PF3D7_1237700		conserved protein, unknown function	No	0.399735	0.002458	-0.0360299	0.067936	-0.0687099	-0.0959703	0.0063515	-0.240435	0.1593	-0.107229	-0.104771	0.0620213	0.0259914	-0.0989857	-0.0310497	-0.0941601	-0.16287	0.10557	0.00959969	-0.0453205	-0.038969	PF3D7_1237700	79	S	___1	GVPLPES(0.023)AS(0.977)EAKK	9	RSLKNMKGVPLPESASEAKKLLEEMKNSEGD	2277.t00365;MAL12P1.363;PFL1825w
PF3D7_1478800		Plasmodium exported protein, unknown function	Yes	0.399636	0.01488	0.3634	0.466825	0.19837	0.257389	0.0701	-0.0674248	0.332211	-1.05147	-1.03659	-0.43854	-0.07514	-0.443605	0.0232201	-0.0327702	0.1656	-0.500069	-0.24268	-0.28606	-0.21596	PF3D7_1478800	78	S	___1	NHINNENDNDIDT(0.001)IS(0.999)NYDIK	15	KNHINNENDNDIDTISNYDIKDKKNDYFYLL	PF14_0760
PF3D7_0916700	HoMu	RNA-binding protein musashi, putative	No	0.39916	0.13492	0.09061	0.10078	0.45225	0.25471	-0.10728	2.17353	2.57269	2.04088	2.1758	1.78637	1.87698	1.97034	2.07112	2.04949	2.50174	1.44649	1.7012	2.26436	2.15708	PF3D7_0916700	24	S	___2	S(1)VEEHNIDDKS(1)LRDEDNK	1	YNSNNSNENSVQDKKSVEEHNIDDKSLRDED	PFI0820c
PF3D7_1312800		conserved Plasmodium protein, unknown function	No	0.39909	-0.20578	0.00563	-0.04828	0.00198	-0.20037	-0.08153	-1.7907	-1.39161	-1.5726	-1.77838	-1.78789	-1.78226	-1.73308	-1.78136	-1.96452	-1.96254	-1.76531	-1.96568	-1.77068	-1.85221	PF3D7_1312800	2	S	___1	S(1)FLLALNESK	1	______________MSFLLALNESKKSAEGS	PF13_0072
PF3D7_0202000	KAHRP	knob-associated histidine-rich protein	Yes	0.39906	-0.03565	-0.04306	0.30982	0.06139	-0.05907	-0.38026	3.76613	4.16519	4.30415	4.2685	4.57318	4.53012	4.40129	4.71111	4.25621	4.3176	4.4078	4.34873	3.66053	3.28027	PF3D7_0202000	558	S	___1	EAT(1)KEAS(0.988)T(0.011)S(0.001)KEATK	7	ATKEASTSKEATKEASTSKEATKEASTSKEA	PF02_0020;PFB0100c
PF3D7_0406500		NYN domain-containing protein, putative	No	0.39879	0.16731	0.20285	0.67725	-0.23582	0.79511	0.03945	-2.60049	-2.2017	-2.77133	-2.60402	-2.90944	-2.70659	-3.12253	-2.44528	-2.93158	-3.1674	-3.01748	-2.22237	-2.73324	-2.69379	PF3D7_0406500	2851	S	___1	REDIDEVDICHS(1)GEYIK	12	KKKKREDIDEVDICHSGEYIKGSPYMKKNSS	MAL4P1.63;PFD0320c
PF3D7_1149000	Pf332	antigen 332, DBL-like protein	Yes	0.39823	0.34118	0.43194	0.07116	0.19866	0.62243	0.649	-1.14715	-0.74892	-1.72977	-1.38859	-1.42247	-0.99053	-1.51969	-1.44853	-2.60479	-2.40613	-1.68877	-1.06634	-1.88517	-1.23617	PF3D7_1149000	1625	S	___1	VS(0.993)VT(0.007)EEVIEEEK	2	GETELSTQEVVDEKVSVTEEVIEEEKSVSEE	PF11_0506;PF11_0507
PF3D7_1146000	RSA4	ribosome assembly protein 4, putative	No	0.398225	0.33812	0.162361	0.297406	0.355151	0.406969	0.08851	0.938995	1.33722	0.68224	1.02036	0.66828	0.830641	0.785894	1.0833	0.735649	1.0908	0.363131	0.7701	0.784609	0.873119	PF3D7_1146000	304	S	___1	NIS(1)PNNTQNNTTSTNCSYFVR	3	TNSKNNSKNNSKRNISPNNTQNNTTSTNCSY	PF11_0471
PF3D7_1139100		RNA-binding protein, putative	No	0.39781	0.08008	0.0167	0.185511	0.19031	0.1307	0.15955	-1.12043	-0.72262	-1.17086	-1.09078	-1.36431	-1.34761	-1.14651	-0.960999	-1.19384	-1.00353	-1.46393	-1.33323	-1.76575	-1.6062	PF3D7_1139100	825	S	___1	SHS(0.012)S(0.987)Y(0.001)NK	4	SNTGLLSSFDFRSHSSYNKYNDKERNNNKNK	PF11_0402
PF3D7_1140200		conserved Plasmodium protein, unknown function	No	0.39773	0.49992	0.2651	0.71407	-0.01639	0.099861	0.48191	-3.21224	-2.81451	-1.70186	-1.20194	-1.5483	-1.2832	-1.8702	-1.15613	-2.23242	-2.24881	-0.5149	-0.415039	-2.4625	-1.98059	PF3D7_1140200	204	S	___1	NSTT(0.145)S(0.854)PKVK	5	ESLSKKKSKKKNSTTSPKVKNVHTIKKEKLR	PF11_0413
PF3D7_1036900		conserved Plasmodium protein, unknown function	No	0.397606	0.209797	0.272091	0.462628	0.340429	0.440659	0.29841	-0.0739346	0.323671	-0.171839	0.0379581	-0.22983	0.0422611	-0.280186	0.182442	-0.16321	0.177219	-0.543829	-0.10317	-0.20573	0.09268	PF3D7_1036900	646	T	___2	LWVSVIT(0.032)NGT(0.679)QNNNEKEET(0.679)LRS(0.61)PK	10	NNKTEKLWVSVITNGTQNNNEKEETLRSPKK	PF10_0361
PF3D7_0401800	PfD80	Plasmodium exported protein (PHISTb), unknown function	Yes	0.3972	0.11096	-0.03931	0.328356	0.3504	0.24515	0.050602	1.5146	1.9118	0.93569	1.04665	1.12184	1.08253	0.989334	1.31769	1.06899	1.41939	0.56777	0.81292	0.815569	0.866171	PF3D7_0401800	73	S	___2	S(0.679)PS(0.215)T(0.109)AS(0.22)T(0.688)S(0.081)T(0.008)SLR	1	KKSSSCSSLASTTKRSPSTASTSTSLRSAST	MAL4P1.16;PFD0080c
PF3D7_0401800	PfD80	Plasmodium exported protein (PHISTb), unknown function	Yes	0.3972	0.11096	-0.03931	0.328356	0.3504	0.24515	0.050602	1.5146	1.9118	0.93569	1.04665	1.12184	1.08253	0.989334	1.31769	1.06899	1.41939	0.56777	0.81292	0.815569	0.866171	PF3D7_0401800	79	T	___2	RS(0.022)PS(0.561)T(0.313)AS(0.475)T(0.732)S(0.692)T(0.163)S(0.042)LR	8	SSLASTTKRSPSTASTSTSLRSASTASTAST	MAL4P1.16;PFD0080c
PF3D7_1408100	PMIII	plasmepsin III	No	0.397184	0.299618	0.255339	0.216637	0.355259	-0.09639	0.012241	-0.301374	0.0958099	-0.157469	0.142149	-0.134039	0.1213	0.0166149	0.233252	-0.20587	0.149389	-0.16316	-0.25955	-0.735111	-0.72287	PF3D7_1408100	204	T	___1	AGT(0.989)IS(0.01)GIFSK	3	YEKDDTPVKLTSKAGTISGIFSKDLVTIGKL	PF14_0078
PF3D7_1303500	NHE	sodium/hydrogen exchanger, Na+, H+ antiporter	No	0.39717	-0.00264	0.36839	0.31671	0.25316	0.11035	0.18515	-1.80082	-1.40365	-1.60845	-1.61109	-1.85226	-1.48387	-1.70529	-1.38858	-1.87674	-1.62358	-1.88327	-1.77292	-1.85818	-1.67303	PF3D7_1303500	752	S	___3	SYDSHTFIES(1)FDDYSCNEK	10	ISFWERSYDSHTFIESFDDYSCNEKRPREKN	PF13_0019
PF3D7_1303500	NHE	sodium/hydrogen exchanger, Na+, H+ antiporter	No	0.39717	-0.00264	0.36839	0.31671	0.25316	0.11035	0.18515	-1.80082	-1.40365	-1.60845	-1.61109	-1.85226	-1.48387	-1.70529	-1.38858	-1.87674	-1.62358	-1.88327	-1.77292	-1.85818	-1.67303	PF3D7_1303500	757	S	___3	SYDSHTFIESFDDYS(1)CNEK	15	RSYDSHTFIESFDDYSCNEKRPREKNKMEKG	PF13_0019
PF3D7_1303500	NHE	sodium/hydrogen exchanger, Na+, H+ antiporter	No	0.39717	-0.00264	0.36839	0.31671	0.25316	0.11035	0.18515	-1.80082	-1.40365	-1.60845	-1.61109	-1.85226	-1.48387	-1.70529	-1.38858	-1.87674	-1.62358	-1.88327	-1.77292	-1.85818	-1.67303	PF3D7_1303500	748	T	___3	S(0.023)Y(0.008)DS(0.08)HT(0.898)FIES(0.907)FDDY(0.124)S(0.959)CNEK	6	RTCDISFWERSYDSHTFIESFDDYSCNEKRP	PF13_0019
PF3D7_0603400	TEX1	trophozoite exported protein 1	No	0.397135	0.347168	0.37974	0.341974	0.13102	0.26784	0.27326	-0.839045	-0.44191	-0.590189	-0.243021	-0.799469	-0.419729	-0.621004	-0.27903	-0.63608	-0.50506	-0.54447	-0.27663	-0.76273	-0.48947	PF3D7_0603400	802	S	___2	DNS(0.001)FNEES(1)KS(1)EEGK	8	MLSGIHIKDNSFNEESKSEEGKIQLRDIQND	2270.t00281;MAL6P1.37;PFF0165c
PF3D7_0603400	TEX1	trophozoite exported protein 1	No	0.397135	0.347168	0.37974	0.341974	0.13102	0.26784	0.27326	-0.839045	-0.44191	-0.590189	-0.243021	-0.799469	-0.419729	-0.621004	-0.27903	-0.63608	-0.50506	-0.54447	-0.27663	-0.76273	-0.48947	PF3D7_0603400	804	S	___2	DNS(0.001)FNEES(1)KS(1)EEGK	10	SGIHIKDNSFNEESKSEEGKIQLRDIQNDND	2270.t00281;MAL6P1.37;PFF0165c
PF3D7_0605100		RNA-binding protein, putative	No	0.39706	0.18993	-0.95082	0.04455	-0.26423	-0.00653	-0.6073	-4.19083	-3.79377	-2.98648	-2.79655	-2.64342	-3.59424	-3.08827	-3.04372	-2.81925	-3.08348	-2.9098	-2.91633	-2.60022	-3.20752	PF3D7_0605100	555	S	___1	EGLVIPLNEIYYNKNS(1)NNNNNNNK	16	EGLVIPLNEIYYNKNSNNNNNNNKYSNHMKK	2270.t00262;MAL6P1.54;PFF0250w
PF3D7_0401800	PfD80	Plasmodium exported protein (PHISTb), unknown function	Yes	0.39704	0.12326	0.44786	0.67242	0.37797	0.30861	-0.0195	2.20051	2.59755	1.76554	1.8888	1.78781	2.23567	1.72079	2.39321	1.70347	2.08144	1.74322	2.05183	1.60448	1.58498	PF3D7_0401800	160	S	___2	S(0.994)AS(0.004)T(0.003)AS(0.376)T(0.624)AR	1	AASTTRSASAASTTRSASTASTARSASTAST	MAL4P1.16;PFD0080c
PF3D7_0401800	PfD80	Plasmodium exported protein (PHISTb), unknown function	Yes	0.39704	0.12326	0.44786	0.67242	0.37797	0.30861	-0.0195	2.20051	2.59755	1.76554	1.8888	1.78781	2.23567	1.72079	2.39321	1.70347	2.08144	1.74322	2.05183	1.60448	1.58498	PF3D7_0401800	166	T	___2	S(0.994)AS(0.004)T(0.003)AS(0.376)T(0.624)AR	7	SASAASTTRSASTASTARSASTASTASAASA	MAL4P1.16;PFD0080c
PF3D7_1007700	AP2-I	AP2 domain transcription factor, putative	No	0.39697	0.287659	0.04196	0.467131	0.0155	-0.11264	-0.06232	-1.49838	-1.10141	-1.2342	-0.946541	-1.1913	-1.14934	-1.36147	-0.894339	-1.22435	-1.20885	-1.39703	-1.50967	-1.4025	-1.46482	PF3D7_1007700	311	S	___1	NETLSNAEFES(0.999)VLS(0.001)YLK	11	MINLKNETLSNAEFESVLSYLKKYEMKSSKG	PF10_0075
PF3D7_0818000	SNRNP27	conserved protein, unknown function	No	0.396927	0.197968	0.042111	0.398657	0.32082	0.183248	0.067541	-0.365076	0.0318508	-0.319109	-0.121141	-0.407549	-0.365438	-0.296745	0.101912	-0.5149	-0.19408	-0.510599	-0.327351	-0.546181	-0.47864	PF3D7_0818000	228	S	___2	IS(1)LNNIQTYDNNDSNIKK	2	SYSTDSMEDKKNDKISLNNIQTYDNNDSNIK	MAL8P1.71
PF3D7_0818000	SNRNP27	conserved protein, unknown function	No	0.396927	0.197968	0.042111	0.398657	0.32082	0.183248	0.067541	-0.365076	0.0318508	-0.319109	-0.121141	-0.407549	-0.365438	-0.296745	0.101912	-0.5149	-0.19408	-0.510599	-0.327351	-0.546181	-0.47864	PF3D7_0818000	240	S	___2	ISLNNIQTYDNNDS(1)NIKK	14	DKISLNNIQTYDNNDSNIKKNNTYVEEDDQY	MAL8P1.71
PF3D7_0918900	gammaGCS	gamma-glutamylcysteine synthetase	No	0.39689	0.05644	-0.08754	0.059131	0.325089	0.36643	-0.32245	-1.16574	-0.76885	-1.06886	-1.01242	-1.13371	-1.22125	-1.0176	-0.958469	-1.09409	-0.769001	-1.48511	-1.11868	-0.92267	-1.24512	PF3D7_0918900	1042	T	___1	T(1)IY(0.001)EES(0.987)MDNT(0.013)VEFAK	1	EVLKDDQDYCTCTRRTIYEESMDNTVEFAKK	PFI0925w
PF3D7_1460500		conserved Plasmodium protein, unknown function	No	0.396465	0.215769	0.21451	0.435325	0.17313	0.363599	0.187161	-0.849575	-0.45311	-0.47337	-0.257601	-0.54019	-0.32568	-0.476114	-0.0407887	-0.52037	-0.34724	-0.69087	-0.327271	-0.56065	-0.373489	PF3D7_1460500	1212	S	___1	DLDLVGCTNT(0.141)S(0.859)CFFHK	11	MKTVRDLDLVGCTNTSCFFHKYRITGCNEKK	PF14_0577
PF3D7_1200700	ACS7	acyl-CoA synthetase	Yes	0.39638	-0.02395	-0.22959	-0.10927	0.10321	-0.064	-0.06967	3.03623	3.43261	3.92606	3.90211	3.88287	3.65328	4.06558	3.95631	3.67682	3.78003	4.12761	4.06361	3.81008	3.74041	PF3D7_1200700	771	S	___1	DDIKS(0.01)GS(0.99)KDDIK	7	KSDIKGGSKDDIKSGSKDDIKSGSKADIKSG	2277.t00007;MAL12P1.7;PFL0035c
PF3D7_1139300	ApiAP2	AP2 domain transcription factor, putative	No	0.396055	0.461777	0.366691	0.550436	0.149309	0.211761	0.251952	-0.252605	0.14345	-0.565039	-0.103262	-0.48855	-0.121859	-0.388374	0.162062	-0.49258	-0.343271	-0.50827	-0.296509	-0.518761	-0.266809	PF3D7_1139300	1588	T	___1	RT(0.5)T(0.5)EDIYK	3	QYLSLPSKKKKKKRTTEDIYKSEIDVLSYQN	PF11_0404
PF3D7_0815800	VPS9	vacuolar protein sorting-associated protein 9, putative	No	0.395347	0.009689	0.322069	0.163234	0.310789	0.233221	0.130392	0.147074	0.542421	0.43561	0.445299	0.249451	0.57152	0.334496	0.49773	0.132919	0.443708	0.28282	0.516041	0.274269	0.404661	PF3D7_0815800	1725	S	___1	TTFLNIS(1)DDEYKEK	7	IEFIKELGKTTFLNISDDEYKEKVANAEKSY	MAL8P1.82
PF3D7_0708400	HSP90	heat shock protein 90	No	0.39488	0.43338	0.28917	0.36401	0.27417	0.30909	0.29772	2.41431	2.80919	2.1949	2.62828	2.35851	2.64768	2.37925	2.74326	2.29755	2.57172	2.16487	2.47396	2.28952	2.58724	PF3D7_0708400	573	S	___1	EGLDIDDS(1)EEAKK	8	KKLKCCTKEGLDIDDSEEAKKDFETLKAEYE	PF07_0029
PF3D7_0113200		Plasmodium exported protein, unknown function	Yes	0.394575	0.151319	0.359101	0.420646	0.21971	0.36253	-0.161808	0.374775	0.76935	0.31769	0.469009	-1.33548	-0.976379	0.0589848	0.479631	0.0874004	0.30711	-0.166189	0.196341	0.109959	-0.0518494	PF3D7_0113200	342	S	___2	S(0.005)NNPPRQDS(0.23)QT(0.724)S(0.85)Y(0.158)Y(0.034)GR	12	YTSRSNNPPRQDSQTSYYGRYTSRTNNQHRS	MAL1P3.08;PFA0630c
PF3D7_1022000		RNA-binding protein, putative	No	0.39457	0.126	0.09906	0.3038	0.13328	0.12401	0.01934	1.56797	1.96254	1.52788	1.65388	1.6054	1.70446	1.62857	1.93237	1.60991	1.74319	1.45621	1.58022	1.65657	1.67591	PF3D7_1022000	985	S	___1	YSNYNYIEENNS(1)EKNESSK	12	RNNKYSNYNYIEENNSEKNESSKLNNFKNQF	PF10_0214
PF3D7_0930500	DGK1	diacylglycerol kinase, putative	No	0.394457	-0.037321	0.03791	0.097335	0.040671	-0.050661	0.198332	0.328344	0.722801	0.652981	0.61566	0.51516	0.55307	0.658585	0.75592	0.652149	0.69282	0.560921	0.51026	0.352579	0.550911	PF3D7_0930500	1118	S	___1	DDELEKNY(0.002)Y(0.002)S(0.996)DFEKENNK	10	GIKIWKDDELEKNYYSDFEKENNKMNDSEYI	PFI1485c
PF3D7_1201000		Plasmodium exported protein (PHISTb), unknown function	Yes	0.393804	-0.145222	0.20968	0.336417	0.16325	0.245281	0.035221	0.493176	0.88698	0.33457	0.189348	0.60718	0.81686	0.240665	0.577082	0.13069	0.29394	0.0244198	0.269701	-0.162651	-0.12743	PF3D7_1201000	405	S	___1	AVPQNS(1)GS(1)NFDEFLDVK	8	SNIKNNLRAVPQNSGSNFDEFLDVKEANEIV	2277.t00010;MAL12P1.10;PFL0050c
PF3D7_0916700	HoMu	RNA-binding protein musashi, putative	No	0.393675	0.123737	0.37751	0.130327	0.232089	0.32057	0.196421	0.355165	0.74884	0.149021	0.272758	-0.16729	0.21022	0.182755	0.313082	0.32439	0.556479	-0.31296	0.00761032	0.139629	0.33605	PF3D7_0916700	95	S	___2	SLGEDNKS(1)VKDDES(1)EAEK	14	EKSLGEDNKSVKDDESEAEKLRRLIAPLSKE	PFI0820c
PF3D7_0210200		conserved Plasmodium protein, unknown function	No	0.39322	0.04497	-0.8316	-0.18249	-0.17046	0.57191	0.04677	-2.46786	-2.07464	-2.32815	-2.28318	-1.33223	-2.16383	-2.26768	-2.45017	-2.22794	-2.3984	-2.20992	-1.63801	-2.08091	-2.03414	PF3D7_0210200	1845	S	___3	NIDHEDEPVS(0.852)S(0.852)NT(0.852)EDDHEENDY(0.38)FT(0.047)Y(0.016)DHIDER	10	ERQDERNIDHEDEPVSSNTEDDHEENDYFTY	PF02_0096;PFB0460c
PF3D7_0210200		conserved Plasmodium protein, unknown function	No	0.39322	0.04497	-0.8316	-0.18249	-0.17046	0.57191	0.04677	-2.46786	-2.07464	-2.32815	-2.28318	-1.33223	-2.16383	-2.26768	-2.45017	-2.22794	-2.3984	-2.20992	-1.63801	-2.08091	-2.03414	PF3D7_0210200	1846	S	___3	NIDHEDEPVS(0.852)S(0.852)NT(0.852)EDDHEENDY(0.38)FT(0.047)Y(0.016)DHIDER	11	RQDERNIDHEDEPVSSNTEDDHEENDYFTYD	PF02_0096;PFB0460c
PF3D7_0210200		conserved Plasmodium protein, unknown function	No	0.39322	0.04497	-0.8316	-0.18249	-0.17046	0.57191	0.04677	-2.46786	-2.07464	-2.32815	-2.28318	-1.33223	-2.16383	-2.26768	-2.45017	-2.22794	-2.3984	-2.20992	-1.63801	-2.08091	-2.03414	PF3D7_0210200	1848	T	___3	NIDHEDEPVS(0.852)S(0.852)NT(0.852)EDDHEENDY(0.38)FT(0.047)Y(0.016)DHIDER	13	DERNIDHEDEPVSSNTEDDHEENDYFTYDHI	PF02_0096;PFB0460c
PF3D7_1408200	ApiAP2	AP2 domain transcription factor AP2-G2, putative	No	0.3927	0.14978	0.09047	0.35823	0.15963	0.07306	0.378	-2.20277	-1.81007	-2.41861	-2.26883	-2.14613	-2.05566	-2.34684	-1.98861	-2.17553	-2.0159	-2.45071	-2.37765	-2.52384	-2.14584	PF3D7_1408200	1100	S	___2	S(0.986)LT(0.013)MDLNES(0.001)MEDEK	1	NSNTKDSLSLMISHKSLTMDLNESMEDEKKE	PF14_0079
PF3D7_1408200	ApiAP2	AP2 domain transcription factor AP2-G2, putative	No	0.3927	0.14978	0.09047	0.35823	0.15963	0.07306	0.378	-2.20277	-1.81007	-2.41861	-2.26883	-2.14613	-2.05566	-2.34684	-1.98861	-2.17553	-2.0159	-2.45071	-2.37765	-2.52384	-2.14584	PF3D7_1408200	1108	S	___2	S(0.983)LT(0.017)MDLNES(1)MEDEK	9	SLMISHKSLTMDLNESMEDEKKEQSKDYNED	PF14_0079
PF3D7_0401800	PfD80	Plasmodium exported protein (PHISTb), unknown function	Yes	0.391756	0.159269	0.37852	0.370846	0.29613	0.283859	-0.128429	0.838484	1.23024	0.42004	0.579309	1.30107	1.67959	0.302814	0.67366	0.0368004	0.33293	0.500601	0.78446	-0.75845	-0.886879	PF3D7_0401800	80	S	___1	SPSTAS(0.001)T(0.004)S(0.994)T(0.001)SLR	8	SLASTTKRSPSTASTSTSLRSASTASTASTL	MAL4P1.16;PFD0080c
PF3D7_1023700		conserved Plasmodium protein, unknown function	No	0.39174	-0.29447	-0.00297	-0.05318	-0.05777	0.48035	0.52708	-2.24678	-1.85504	-1.76785	-2.06232	-2.00779	-2.01076	-2.21895	-2.27213	-2.11513	-2.1729	-2.32921	-1.84886	-2.44647	-1.91939	PF3D7_1023700	489	S	___3	GKNEDY(1)MGHT(1)NDAY(1)S(1)QHGENNK	15	KGKNEDYMGHTNDAYSQHGENNKMHSINSDR	PF10_0230
PF3D7_1023700		conserved Plasmodium protein, unknown function	No	0.39174	-0.29447	-0.00297	-0.05318	-0.05777	0.48035	0.52708	-2.24678	-1.85504	-1.76785	-2.06232	-2.00779	-2.01076	-2.21895	-2.27213	-2.11513	-2.1729	-2.32921	-1.84886	-2.44647	-1.91939	PF3D7_1023700	484	T	___3	GKNEDY(1)MGHT(1)NDAY(1)S(1)QHGENNK	10	EMKKLKGKNEDYMGHTNDAYSQHGENNKMHS	PF10_0230
PF3D7_1023700		conserved Plasmodium protein, unknown function	No	0.39174	-0.29447	-0.00297	-0.05318	-0.05777	0.48035	0.52708	-2.24678	-1.85504	-1.76785	-2.06232	-2.00779	-2.01076	-2.21895	-2.27213	-2.11513	-2.1729	-2.32921	-1.84886	-2.44647	-1.91939	PF3D7_1023700	480	Y	___3	GKNEDY(1)MGHT(1)NDAY(1)S(1)QHGENNK	6	TQSLEMKKLKGKNEDYMGHTNDAYSQHGENN	PF10_0230
PF3D7_1023700		conserved Plasmodium protein, unknown function	No	0.39174	-0.29447	-0.00297	-0.05318	-0.05777	0.48035	0.52708	-2.24678	-1.85504	-1.76785	-2.06232	-2.00779	-2.01076	-2.21895	-2.27213	-2.11513	-2.1729	-2.32921	-1.84886	-2.44647	-1.91939	PF3D7_1023700	488	Y	___3	GKNEDY(1)MGHT(1)NDAY(1)S(1)QHGENNK	14	LKGKNEDYMGHTNDAYSQHGENNKMHSINSD	PF10_0230
PF3D7_1478600	PTP3	EMP1-trafficking protein	Yes	0.39165	0.086048	0.24395	0.28022	0.17068	0.19532	0.11468	2.71782	3.10947	0.448271	0.534319	2.64864	2.89259	2.49204	2.77226	2.48792	2.6586	2.34598	2.5413	2.40081	2.51549	PF3D7_1478600;PF3D7_1477000	1031;776	S	___1	GIDDEES(0.054)S(0.946)NKGK	8	KIAKTVLKGIDDEESSNKGKNENKKKKKKDK	PF14_0758
PF3D7_0402100		Plasmodium exported protein (PHISTb), unknown function	Yes	0.39132	0.16439	0.63208	0.09597	0.37785	0.04689	0.17236	-3.44849	-3.05717	-3.76851	-3.60412	-3.62533	-2.99325	-3.61263	-3.51666	-3.95831	-3.58046	-3.70142	-3.65453	-3.56397	-3.39161	PF3D7_0402100	94	S	___1	QVPKEES(1)ENS(1)NNDIFEYYK	7	NYGEGSLLKQVPKEESENSNNDIFEYYKTLF	MAL4P1.19;PFD0095c
PF3D7_0102900		aspartate--tRNA ligase	No	0.39111	-0.14159	0.11256	0.30393	0.2328	0.17985	-0.1889	-2.15128	-1.76017	-1.58396	-1.72555	-1.93258	-1.82002	-1.97071	-1.66678	-2.11873	-1.88593	-2.02413	-1.84428	-1.79594	-1.98484	PF3D7_0102900	56	S	___1	DDVVS(0.86)S(0.122)T(0.018)PAATEEAVMNDK	5	LFVCGLRKMEKDDVVSSTPAATEEAVMNDKK	MAL1P1.20;PFA0145c
PF3D7_0628200	PK4	eukaryotic translation initiation factor 2-alpha kinase	No	0.390844	0.170469	0.371941	0.289075	0.34808	0.082889	0.145052	0.724276	1.11512	0.67137	0.841839	0.30768	0.679621	0.894865	1.18394	0.8585	1.20658	0.679411	0.7623	0.479149	0.624201	PF3D7_0628200	2318	S	___2	NNAPNLVFYS(1)DNDGLTSK	10	KEVLRKNNAPNLVFYSDNDGLTSKNKENPEK	2270.t00170;MAL6P1.146;PFF1370w
PF3D7_0628200	PK4	eukaryotic translation initiation factor 2-alpha kinase	No	0.390844	0.170469	0.371941	0.289075	0.34808	0.082889	0.145052	0.724276	1.11512	0.67137	0.841839	0.30768	0.679621	0.894865	1.18394	0.8585	1.20658	0.679411	0.7623	0.479149	0.624201	PF3D7_0628200	2324	T	___2	NNAPNLVFY(0.006)S(0.994)DNDGLT(0.533)S(0.467)KNKENPEK	16	NNAPNLVFYSDNDGLTSKNKENPEKNHNPFL	2270.t00170;MAL6P1.146;PFF1370w
PF3D7_0525000		zinc finger protein, putative	No	0.39061	-0.50256	-0.17704	-0.21554	-0.02199	0.08289	0.41079	-4.0318	-3.64119	-3.39134	-3.8939	-4.08132	-4.25836	-3.33984	-3.55538	-4.19702	-4.21901	-3.72799	-3.6451	-4.46666	-4.05587	PF3D7_0525000	552	S	___1	NS(0.5)GS(0.5)FNEQNFLFNDDDCVNNVNMNDLNNIK	2	SSDIKNFLNLLHLKNSGSFNEQNFLFNDDDC	MAL5P1.249;PFE1245w
PF3D7_0525000		zinc finger protein, putative	No	0.39061	-0.50256	-0.17704	-0.21554	-0.02199	0.08289	0.41079	-4.0318	-3.64119	-3.39134	-3.8939	-4.08132	-4.25836	-3.33984	-3.55538	-4.19702	-4.21901	-3.72799	-3.6451	-4.46666	-4.05587	PF3D7_0525000	554	S	___1	NS(0.5)GS(0.5)FNEQNFLFNDDDCVNNVNMNDLNNIK	4	DIKNFLNLLHLKNSGSFNEQNFLFNDDDCVN	MAL5P1.249;PFE1245w
PF3D7_1116800	HSP101	heat shock protein 101	Yes	0.39045	0.08682	0.2685	0.27348	0.26622	0.20637	0.11067	3.01575	3.4062	2.97602	3.06284	2.89513	3.16363	3.01023	3.28371	3.02222	3.28844	2.90072	3.10709	3.03487	3.14554	PF3D7_1116800	356	S	___1	FIESCS(1)AFER	6	GATTIAEYRKFIESCSAFERRFEKILVEPPS	PF11_0175
PF3D7_0818000	SNRNP27	conserved protein, unknown function	No	0.390405	0.219748	0.178261	0.642976	0.353981	0.29844	0.13975	0.886145	1.27655	0.768131	0.987879	0.81036	0.988621	0.824394	1.46737	0.726959	1.08094	0.75728	1.05572	0.60569	0.74544	PF3D7_0818000	240	S	___1	ISLNNIQTYDNNDS(1)NIKK	14	DKISLNNIQTYDNNDSNIKKNNTYVEEDDQY	MAL8P1.71
PF3D7_1408200	ApiAP2	AP2 domain transcription factor AP2-G2, putative	No	0.390116	0.451769	0.21998	0.034996	0.117838	0.19944	0.22785	0.105125	0.495241	-0.38147	0.0702991	0.0149899	0.23497	0.316904	0.3519	0.228491	0.346329	-0.0177689	0.181671	0.0493793	0.277229	PF3D7_1408200	955	S	___1	NGS(1)IIQES(1)DNDNYNTTR	8	TDQYKTNKNGSIIQESDNDNYNTTRNEEIHE	PF14_0079
PF3D7_0305300		conserved Plasmodium membrane protein, unknown function	No	0.389877	0.164148	0.158159	0.251585	0.110649	0.163349	0.226921	0.559784	0.949661	0.682131	0.846279	0.789871	0.94803	0.811445	1.06303	0.75127	0.861919	0.804821	0.96817	0.683849	0.91077	PF3D7_0305300	10	S	___1	MDVYKEENS(1)DLLNHQEEEISR	9	______MMDVYKEENSDLLNHQEEEISRNSN	MAL3P2.17;PFC0240c
PF3D7_1343400	RAD5	DNA repair protein RAD5, putative	No	0.389666	0.06802	0.09404	0.22771	0.290831	0.11003	0.04532	0.920984	1.31065	1.15495	1.22297	1.03122	1.12526	1.04106	1.26877	0.870939	1.16177	0.92886	1.03889	1.00173	1.04705	PF3D7_1343400	68	S	___1	NKEMS(1)S(1)DIEIIEDIGNYK	5	KDVKKNIEYNKNKEMSSDIEIIEDIGNYKYE	MAL13P1.216
PF3D7_1343400	RAD5	DNA repair protein RAD5, putative	No	0.389666	0.06802	0.09404	0.22771	0.290831	0.11003	0.04532	0.920984	1.31065	1.15495	1.22297	1.03122	1.12526	1.04106	1.26877	0.870939	1.16177	0.92886	1.03889	1.00173	1.04705	PF3D7_1343400	69	S	___1	NKEMS(1)S(1)DIEIIEDIGNYK	6	DVKKNIEYNKNKEMSSDIEIIEDIGNYKYEK	MAL13P1.216
PF3D7_0914000		pseudouridylate synthase, putative	No	0.38934	-0.22831	-0.0356	0.22443	0.14346	0.15003	0.09764	-1.59365	-1.20431	-1.36734	-1.59565	-1.6523	-1.6879	-1.60047	-1.37604	-1.53415	-1.39069	-1.70652	-1.55649	-1.79127	-1.69363	PF3D7_0914000	207	S	___1	DVSQDVS(1)QDINR	7	ENYNQDVSQDVSQDVSQDINRDISRDVSQDV	PFI0685w
PF3D7_1326500		conserved Plasmodium protein, unknown function	No	0.38915	0.38291	0.3396	0.42886	0.04001	0.18361	0.25921	-1.22408	-0.83493	-1.56342	-1.18051	-1.68728	-1.34768	-1.82271	-1.39385	-1.45787	-1.41786	-1.62106	-1.43745	-1.68451	-1.4253	PF3D7_1326500	1438	S	___1	S(0.118)LS(0.882)VENRHEK	3	NLVSSYKKGMTNRSLSVENRHEKENSKNKKG	MAL13P1.145
PF3D7_0401800	PfD80	Plasmodium exported protein (PHISTb), unknown function	Yes	0.38882	0.07504	0.34614	0.09027	-0.18007	-0.1945	-0.31454	-3.17496	-2.78614	-2.66081	-2.58577	-1.88121	-1.53507	-2.77796	-2.68769	-2.67435	-2.85442	-2.51201	-2.70651	-2.76313	-3.07767	PF3D7_0401800	184	T	___1	SASTASTASAAS(0.032)AAS(0.968)T(0.968)T(0.032)R	16	SASTASTASAASAASTTRSASAASTTRSASA	MAL4P1.16;PFD0080c
PF3D7_0307900		conserved Plasmodium protein, unknown function	No	0.38852	0.13123	0.05307	0.30656	0.32318	-0.03904	-0.64786	-3.00522	-2.6167	-3.10125	-2.97002	-2.96742	-2.91435	-3.11203	-2.80547	-3.32213	-2.99895	-2.77522	-2.81426	-2.63635	-3.28421	PF3D7_0307900	616	S	___1	VNVYEEDIIGS(0.582)NEDDEY(0.418)IHVLK	11	ITNNKVNVYEEDIIGSNEDDEYIHVLKENLK	MAL3P3.3;PFC0335c
PF3D7_0202000	KAHRP	knob-associated histidine-rich protein	Yes	0.38791	-0.12409	0.14554	0.19093	0.09374	-0.0341	-0.26806	3.11304	3.50095	4.29802	4.17393	3.03671	3.18225	2.73409	2.92502	3.4406	3.53434	3.68848	3.65438	3.71593	3.44787	PF3D7_0202000	524	S	___1	TGAS(0.977)T(0.022)NAATNK	4	AKDKTQGGKTDKTGASTNAATNKGQCAAEGA	PF02_0020;PFB0100c
PF3D7_0805900		conserved protein, unknown function	No	0.3875	0.11044	-0.66157	0.09047	0.1409	0.03519	0.30092	-3.1568	-2.7693	-3.03379	-2.92335	-3.17462	-3.83619	-3.27798	-3.18751	-3.27974	-3.13884	-3.61558	-3.58039	-3.58301	-3.28209	PF3D7_0805900	2	S	___1	S(0.561)Y(0.439)VDLS(0.001)GYK	1	______________MSYVDLSGYKIPKKMFD	MAL8P1.136
PF3D7_1016300	GBP130	glycophorin binding protein	Yes	0.387426	0.14437	0.0763	0.22248	0.47975	0.15912	0.13474	0.982704	1.37013	1.83701	1.98138	1.67745	1.75375	1.83179	2.05427	1.49581	1.97556	1.41507	1.57419	1.51094	1.64568	PF3D7_1016300	137	S	___1	VES(0.008)DS(0.992)EKQK	5	ENKSVVTEEQKVESDSEKQKRTKKVVKKQIN	PF10_0159
PF3D7_1417300	ATG4	cysteine protease ATG4, putative	No	0.38718	0.02586	0.06209	0.21597	1.06434	-0.4018	0.48757	-3.54449	-3.15731	-3.32012	-3.29426	-3.71002	-3.64793	-3.7887	-3.57273	-4.34952	-3.28518	-3.40723	-3.80903	-3.61501	-3.12744	PF3D7_1417300	1119	S	___1	NELNYDT(0.005)DDS(0.995)GLVVL	10	PQYVYKNELNYDTDDSGLVVL__________	PF14_0171
PF3D7_0903200	RAB7	ras-related protein RAB7	No	0.38715	0.10448	0.062651	0.48844	-0.07262	-0.197062	-0.193141	-1.85854	-1.47139	-1.12118	-1.0167	-0.87611	-0.813459	-1.07668	-0.58824	-0.98122	-1.05384	-0.494749	-0.691811	-0.69313	-0.886271	PF3D7_0903200	146	S	___1	VLQWCKS(0.966)NNNIPY(0.034)FETSAK	7	NKRKVQSLKVLQWCKSNNNIPYFETSAKNAI	PFI0155c
PF3D7_0201500		Plasmodium exported protein (hyp9), unknown function	Yes	0.38693	0.41431	0.18234	-0.11765	0.42771	0.34072	-0.02852	-2.39264	-2.00571	-2.05898	-1.64467	-1.92444	-1.7421	-2.15551	-2.27316	-2.23512	-1.80741	-2.14103	-1.80031	-1.95387	-1.98239	PF3D7_0201500	171	T	___2	IVEIKDET(0.008)NDET(0.066)DNET(0.892)NDET(0.033)DNETNDEK	16	IVEIKDETNDETDNETNDETDNETNDEKSIK	PF02_0015;PFB0075c
PF3D7_0201500		Plasmodium exported protein (hyp9), unknown function	Yes	0.38693	0.41431	0.18234	-0.11765	0.42771	0.34072	-0.02852	-2.39264	-2.00571	-2.05898	-1.64467	-1.92444	-1.7421	-2.15551	-2.27316	-2.23512	-1.80741	-2.14103	-1.80031	-1.95387	-1.98239	PF3D7_0201500	175	T	___2	IVEIKDET(0.012)NDET(0.262)DNET(0.862)NDET(0.862)DNET(0.002)NDEK	20	KDETNDETDNETNDETDNETNDEKSIKKKKK	PF02_0015;PFB0075c
PF3D7_0906600		zinc finger protein, putative	No	0.386616	0.17224	0.127669	0.203295	0.201151	0.117411	0.059632	0.932514	1.31913	0.83811	1.01035	0.909231	1.0369	0.933645	1.13694	0.907419	1.10857	0.78537	0.902781	0.902149	0.961781	PF3D7_0906600	586	S	___1	CS(0.002)S(0.997)T(0.002)SNLLTDINCTNK	3	FLEETTSGEKFGRCSSTSNLLTDINCTNKQD	PFI0325c
PF3D7_0113200		Plasmodium exported protein, unknown function	Yes	0.3866	0.21629	0.35063	0.46989	0.20541	0.28087	0.02774	2.17266	2.55926	1.80332	2.01961	-0.424639	-0.0740089	1.72514	2.19503	1.6688	1.87421	1.50013	1.781	1.61587	1.64361	PF3D7_0113200	341	T	___2	SNNPPRQDS(0.028)QT(0.923)S(0.049)YYGR	11	RYTSRSNNPPRQDSQTSYYGRYTSRTNNQHR	MAL1P3.08;PFA0630c
PF3D7_0113200		Plasmodium exported protein, unknown function	Yes	0.386057	0.125338	-0.18919	0.147756	0.18915	0.125911	0.31147	-0.695736	-0.309679	-0.731089	-0.605751	-2.36946	-2.55865	-0.762405	-0.614649	-1.1068	-0.91765	-1.04325	-0.917339	-1.40777	-1.0963	PF3D7_0113200	343	Y	___2	S(0.014)NNPPRQDS(0.966)QT(0.071)S(0.25)Y(0.674)Y(0.025)GR	13	TSRSNNPPRQDSQTSYYGRYTSRTNNQHRSE	MAL1P3.08;PFA0630c
PF3D7_0710200		conserved Plasmodium protein, unknown function	No	0.385935	0.027988	0.02199	0.035477	0.24856	0.078121	0.014961	-0.958075	-0.57214	-0.58712	-0.559132	-0.57012	-0.54813	-0.762165	-0.726688	-0.824181	-0.575621	-0.73349	-0.655369	-0.825401	-0.81044	PF3D7_0710200	2765	S	___1	NIENEEQNMLINS(1)EIENDGNHNEVPCAVINVHENIR	13	EIKNIENEEQNMLINSEIENDGNHNEVPCAV	PF07_0042
PF3D7_1333800		conserved Plasmodium protein, unknown function	No	0.38553	0.20791	-0.04184	0.01042	0.1097	0.04434	-0.03483	-2.56682	-2.18129	-2.13167	-1.92376	-2.08506	-2.1269	-2.23985	-2.22943	-2.29718	-2.18748	-2.20765	-2.16331	-2.1968	-2.23163	PF3D7_1333800	160	T	___1	SEQTNDDEENS(1)DT(0.998)DNDLPY(0.002)DEISTPEILLVSK	13	IIKSEQTNDDEENSDTDNDLPYDEISTPEIL	PF13_0186
PF3D7_0730900	PTP4	EMP1-trafficking protein	Yes	0.38488	0.25479	0.26831	0.5305	0.37301	0.30363	0.16907	3.79331	4.17819	3.78745	4.04224	3.72476	3.99307	3.82668	4.35718	3.96129	4.3343	3.57663	3.88026	3.48303	3.6521	PF3D7_0730900	1167	T	___1	HLT(1)DEENKVEK	3	ETKKDIPQNKNYKHLTDEENKVEKEMSIHDG	MAL7P1.171
PF3D7_1436300	PTEX150	translocon component PTEX150	No	0.384855	0.10422	0.59828	0.50641	0.44137	0.35474	-0.55927	-0.983604	-0.598749	-1.75483	-1.65061	-1.9109	-1.31262	-1.7487	-1.24229	-1.67137	-1.23	-2.00966	-1.65492	-3.77936	-4.33863	PF3D7_1436300	547	S	___1	MS(0.557)VS(0.425)T(0.018)HNK	2	LISSSQFDNNKKNKMSVSTHNKKSKNLMDSL	PF14_0344;Pf112
PF3D7_1033200	ETRAMP10.2	early transcribed membrane protein 10.2	Yes	0.384817	0.148159	0.09842	0.140066	0.217569	0.058161	-0.14759	-0.179466	0.205351	-0.19603	-0.0478706	-1.27142	-1.173	-0.0748844	0.0651817	-0.28158	-0.0640106	-0.47304	-0.414879	-0.99729	-1.14488	PF3D7_1033200	254	S	___1	NS(0.5)S(0.5)EDKPTSESK	2	NDMDPLNPYGSSKRNSSEDKPTSESKGTTPE	PF10_0323
PF3D7_1356000		conserved Plasmodium protein, unknown function	No	0.384751	-0.00633	0.18417	0.40231	0.14062	0.25555	0.16736	-1.21188	-0.827129	-1.2437	-1.25003	-1.42698	-1.24281	-1.48215	-1.07984	-1.33415	-1.19353	-1.50613	-1.25058	-1.54856	-1.3812	PF3D7_1356000	1397	S	___1	QYSYDYT(0.005)S(0.994)D	8	HYPLNLIKQYSYDYTSD______________	PF13_0298
PF3D7_1343000	PMT	phosphoethanolamine N-methyltransferase	No	0.38467	0.3969	0.39355	0.48227	0.50778	0.42902	0.31336	2.54766	2.93233	2.3545	2.7514	2.3391	2.73265	2.33954	2.82181	1.97113	2.47891	2.10644	2.53546	2.24476	2.55812	PF3D7_1343000	49	S	___1	KILS(1)DIELNENSK	4	NYISSGGLEATKKILSDIELNENSKVLDIGS	MAL13P1.214
PF3D7_0401800	PfD80	Plasmodium exported protein (PHISTb), unknown function	Yes	0.38401	0.36207	0.16149	0.68182	0.45548	0.41284	0.12814	3.13323	3.51724	2.81613	3.1782	3.05086	3.21235	2.6414	3.32322	2.57184	3.02732	2.94014	3.35298	2.32767	2.45581	PF3D7_0401800	75	S	___2	SPS(0.997)T(0.694)AS(0.298)T(0.009)S(0.002)T(0.001)SLR	3	SSSCSSLASTTKRSPSTASTSTSLRSASTAS	MAL4P1.16;PFD0080c
PF3D7_0915400	PFK9	ATP-dependent 6-phosphofructokinase	No	0.383686	0.043098	0.106731	0.197874	0.29435	0.083179	0.063212	-0.379305	0.00438118	-0.55088	-0.507782	-0.41341	-0.306679	-0.488674	-0.2908	-0.500111	-0.205761	-0.523729	-0.44055	-0.237341	-0.174129	PF3D7_0915400	749	S	___2	S(0.831)NT(0.259)S(0.671)DVLS(0.077)S(0.161)EPVNQGFYEQHASSYK	1	YNVNGDGMNTLNCQKSNTSDVLSSEPVNQGF	PFI0755c
PF3D7_0915400	PFK9	ATP-dependent 6-phosphofructokinase	No	0.383686	0.043098	0.106731	0.197874	0.29435	0.083179	0.063212	-0.379305	0.00438118	-0.55088	-0.507782	-0.41341	-0.306679	-0.488674	-0.2908	-0.500111	-0.205761	-0.523729	-0.44055	-0.237341	-0.174129	PF3D7_0915400	752	S	___2	S(0.028)NT(0.126)S(0.846)DVLSSEPVNQGFYEQHASSYK	4	NGDGMNTLNCQKSNTSDVLSSEPVNQGFYEQ	PFI0755c
PF3D7_1139300	ApiAP2	AP2 domain transcription factor, putative	No	0.38358	0.24116	0.15194	0.39275	0.22172	0.1385	0.1064	1.59612	1.9797	1.319	1.56016	1.64601	1.79795	1.70815	2.1009	1.63748	1.8592	1.38952	1.52802	1.72559	1.83199	PF3D7_1139300	1800	S	___1	CSNENS(0.001)VCINKS(0.999)NEK	12	SFDKCSNENSVCINKSNEKLENILDGGVNMR	PF11_0404
PF3D7_1033200	ETRAMP10.2	early transcribed membrane protein 10.2	Yes	0.383515	0.024899	0.199791	0.474247	-0.049971	0.239861	0.117901	-0.907925	-0.52441	-0.23736	-0.212461	-0.25683	-0.0570393	-0.481565	-0.0073185	-0.48233	-0.532301	-0.46756	-0.227699	-0.55423	-0.436329	PF3D7_1033200	333	S	___1	S(0.083)KGPS(0.542)S(0.375)PLRDSSGR	5	SNRSSSGTSTRSKGPSSPLRDSSGRSSGRST	PF10_0323
PF3D7_1138400	GCalpha	guanylyl cyclase	No	0.38296	0.19423	-0.0099	-0.06514	-0.32062	0.00501	-0.1533	-2.53466	-2.1517	-2.46422	-2.26999	-1.99484	-2.00474	-2.15736	-2.2225	-1.92402	-2.24464	-1.68107	-1.67606	-2.12389	-2.27719	PF3D7_1138400	3484	S	___1	LS(0.999)IS(0.001)DS(0.001)LYYLNENVIR	2	DFDDIKDLRIGMNKLSISDSLYYLNENVIRN	PF11_0395
PF3D7_0401800	PfD80	Plasmodium exported protein (PHISTb), unknown function	Yes	0.382845	0.601627	0.927291	0.786781	0.632639	0.88437	0.708751	0.0251751	0.40802	-0.736519	-0.134892	-1.69679	-0.769499	-1.00308	-0.216299	-0.60499	0.0276489	-1.21827	-0.3339	-1.35123	-0.642479	PF3D7_0401800	331	Y	___1	EGNES(0.044)DNIY(0.956)CMLCSSNTR	9	SVDDNNKEGNESDNIYCMLCSSNTRGFGCDC	MAL4P1.16;PFD0080c
PF3D7_0404600		conserved Plasmodium membrane protein, unknown function	No	0.38243	0.14856	0.351981	0.04025	0.17645	0.77441	0.11541	-1.0365	-0.65407	-1.05571	-0.90715	-1.26068	-0.908699	-1.07088	-1.03063	-1.30981	-1.13336	-1.60201	-0.8276	-1.25549	-1.14008	PF3D7_0404600	2090	T	___1	RGEQT(0.583)NS(0.417)NDEYKK	5	NDISYNYVDMKRGEQTNSNDEYKKKNSYYIK	MAL4P1.44;PFD0220c;PFD0220w;PFD0225w
PF3D7_0425900	RIF	rifin	No	0.38225	0.60617	0.72642	0.1754	-0.00587	NaN	-2.44479	-2.81703	-2.43478	-2.84589	-2.23972	-3.17048	-2.44406	-2.64954	-2.47414	-2.58846	-2.59433	-5.57763	NaN	-4.42901	-6.8738	PF3D7_0425900	208	S	___1	NYS(0.581)S(0.14)S(0.14)S(0.14)LIIQAIDAAAGPICDVPVNESLK	3	LPGFNLANIINPKNYSSSSLIIQAIDAAAGP	MAL4P1.243;PFD1240w
PF3D7_1149000	Pf332	antigen 332, DBL-like protein	Yes	0.38207	0.38883	0.33355	0.3925	0.036659	0.40408	0.31649	3.14635	3.52842	2.92226	3.31109	2.69674	3.03029	3.07034	3.46284	0.587271	0.62393	2.35301	2.75709	2.81964	3.13613	PF3D7_1149000	3282	S	___1	LVVEEEGS(1)ATEGIVEDR	8	KEEVEEQRLVVEEEGSATEGIVEDRLATEGI	PF11_0506;PF11_0507
PF3D7_0932100		protein MAM3, putative	No	0.38184	-0.03111	0.10154	-0.09557	-0.11882	-0.224821	-0.06127	-2.16965	-1.78781	-1.58853	-1.61964	-1.27668	-1.17514	-1.18485	-1.28042	-1.19944	-1.31826	-0.849409	-1.07423	-1.06403	-1.1253	PF3D7_0932100	953	S	___2	TGSSIPS(0.001)NFVWKNS(0.999)DDSK	14	IKTGSSIPSNFVWKNSDDSKKKMKSKIRRRN	PFI1560c
PF3D7_1438400	MCA2	metacaspase-like protein	No	0.3816	0.15325	0.10976	0.20994	0.26648	0.24932	0.07106	1.61757	1.99917	1.7219	1.87515	1.63247	1.74223	1.63148	1.84142	1.69347	1.95995	1.341	1.59032	1.7165	1.78756	PF3D7_1438400	1312	S	___1	SVHYDMDEILS(1)LK	11	KKKIKSVHYDMDEILSLKCKVYDELDTCLKC	PF14_0362;PF14_0363
PF3D7_1464600	UIS2	serine/threonine protein phosphatase UIS2, putative	No	0.38148	0.51733	0.36349	0.33893	0.013269	0.16823	0.19227	1.34683	1.72831	1.57951	2.09684	1.67881	2.0423	1.72379	2.06272	0.55374	0.567009	1.81301	1.98124	1.54238	1.73465	PF3D7_1464600	633	T	___1	DLGT(0.001)NT(0.999)LSAESIANFYNDK	6	KKKSEKQVHKDLGTNTLSAESIANFYNDKIK	PF14_0614
PF3D7_0202000	KAHRP	knob-associated histidine-rich protein	Yes	0.38108	0.12431	-0.00509	0.38549	0.16472	0.10371	-0.06968	4.35737	4.73845	4.60785	4.73216	4.77792	4.77283	4.70801	5.0935	4.51026	4.67498	4.7414	4.84511	3.96111	3.89143	PF3D7_0202000	598	S	___2	GAS(0.991)T(0.961)T(0.048)AGS(0.965)T(0.03)T(0.005)GATTGANAVQSK	3	ATKEASTTEGATKGASTTAGSTTGATTGANA	PF02_0020;PFB0100c
PF3D7_0505800	SUMO	small ubiquitin-related modifier	No	0.380715	0.25112	0.10696	0.441345	-0.0636196	0.29296	0.177919	0.0675354	0.44825	0.15427	0.40539	0.151501	0.258461	0.0600948	0.50144	0.000919342	-0.0627003	-0.138739	0.154221	-0.154819	0.0230999	PF3D7_0505800	6	S	___2	GDDDS(1)AVNNNGS(0.125)S(0.875)PVNNQGEHIQVK	5	__________MGDDDSAVNNNGSSPVNNQGE	MAL5P1.58;PFE0285c
PF3D7_1366900		conserved Plasmodium protein, unknown function	No	0.38053	-0.81237	0.65128	1.82256	0.00019	2.08388	-1.32145	3.0845	3.46503	3.44135	2.62898	1.74496	2.39624	0.776196	2.59876	1.84342	1.84361	0.63571	2.71959	2.08233	0.76088	PF3D7_1366900	338	S	___1	EHS(1)NHTVNR	3	GPRNNVNNSEHMREHSNHTVNRFAPMGQYAN	MAL13P1.336
PF3D7_1351400		60S ribosomal protein L17, putative	No	0.380436	0.108788	0.281339	0.169525	-0.0019	0.16637	0.27248	-0.720886	-0.34045	-0.421919	-0.313131	-0.487129	-0.20579	-0.425674	-0.256149	-0.3687	-0.3706	-0.187429	-0.021059	-0.41687	-0.14439	PF3D7_1351400	160	S	___1	KS(1)LLS(1)NAEK	2	HIQIIAREINKPAKKSLLSNAEKQKKLPFKV	PF13_0268
PF3D7_0614300	MFR1	major facilitator superfamily-related transporter, putative	No	0.38011	0.18906	0.1641	-0.07134	-0.240981	0.119869	0.17081	-1.54263	-1.16252	-1.35064	-1.16158	-1.10102	-0.93692	-1.04209	-1.11343	-0.873159	-1.11414	-0.80855	-0.688681	-0.963001	-0.792191	PF3D7_0614300	422	S	___2	T(1)S(1)NIS(1)NLKNIS(0.5)S(0.5)GK	2	NDNTNDTNNLSSAKTSNISNLKNISSGKSID	2270.t00033;MAL6P1.283;PFF0690c
PF3D7_0614300	MFR1	major facilitator superfamily-related transporter, putative	No	0.38011	0.18906	0.1641	-0.07134	-0.240981	0.119869	0.17081	-1.54263	-1.16252	-1.35064	-1.16158	-1.10102	-0.93692	-1.04209	-1.11343	-0.873159	-1.11414	-0.80855	-0.688681	-0.963001	-0.792191	PF3D7_0614300	425	S	___2	T(1)S(1)NIS(1)NLKNIS(0.5)S(0.5)GK	5	TNDTNNLSSAKTSNISNLKNISSGKSIDDST	2270.t00033;MAL6P1.283;PFF0690c
PF3D7_0420300	ApiAP2	AP2 domain transcription factor, putative	No	0.380061	0.00458	0.30417	-0.06254	-0.17956	0.02009	-0.18443	-1.20797	-0.827909	-1.13507	-1.13049	-1.25143	-0.94726	-1.00536	-1.0679	-0.762661	-0.942221	-1.18679	-1.1667	-1.0083	-1.19273	PF3D7_0420300	3333	S	___1	RLNS(0.999)PY(0.001)NK	4	CLENGLLNSRKRRLNSPYNKKDESFSMMPDN	MAL4P1.192;PFD0985w
PF3D7_0927600		RNA-binding protein, putative	No	0.37965	0.22733	-0.05829	-0.40876	-0.30101	0.34453	0.06604	-2.58742	-2.20777	-1.88725	-1.65992	-2.01733	-2.07562	-1.81065	-2.21941	-2.18033	-2.48134	-2.39359	-2.04906	-2.12453	-2.05849	PF3D7_0927600	389	T	___1	NNNSISVLDY(0.025)T(0.98)VS(0.98)HDVT(0.014)LDENNIPLNPTK	11	ENSMKNNNSISVLDYTVSHDVTLDENNIPLN	PFI1355w
PF3D7_0104300	UBP1	ubiquitin carboxyl-terminal hydrolase 1, putative	No	0.37959	-0.15905	-0.13337	-0.03596	0.25056	0.08833	-0.10221	-2.29726	-1.91767	-1.87409	-2.03314	-2.01755	-2.15092	-1.98654	-2.0225	-2.14695	-1.89639	-2.13334	-2.04501	-1.73314	-1.83535	PF3D7_0104300	438	S	___1	YDNTNDYLDDLES(1)FEYNK	13	NNKYDNTNDYLDDLESFEYNKTKKKKKKKND	MAL1P1.34b;PFA0215w;PFA0220w
PF3D7_1310400		conserved Plasmodium protein, unknown function	No	0.37955	0.02462	0.22798	0.528546	0.19646	0.37649	0.234451	1.2071	1.58665	1.22827	1.25289	1.14847	1.37645	0.956804	1.48535	1.09897	1.29543	0.8834	1.25989	0.987909	1.22236	PF3D7_1310400	36	S	___2	YDEDKLS(1)EAT(1)DQEK	7	SYIHSDKKKYDEDKLSEATDQEKKSKNNEKY	PF13_0056
PF3D7_1310400		conserved Plasmodium protein, unknown function	No	0.37955	0.02462	0.22798	0.528546	0.19646	0.37649	0.234451	1.2071	1.58665	1.22827	1.25289	1.14847	1.37645	0.956804	1.48535	1.09897	1.29543	0.8834	1.25989	0.987909	1.22236	PF3D7_1310400	39	T	___2	YDEDKLS(1)EAT(1)DQEK	10	HSDKKKYDEDKLSEATDQEKKSKNNEKYKHE	PF13_0056
PF3D7_1140700		conserved Plasmodium protein, unknown function	No	0.379526	0.19599	0.39701	0.0915	0.17932	0.26407	0.03182	-0.638016	-0.25849	-1.07045	-0.87446	-1.22738	-0.83037	-1.02773	-0.93623	-0.95048	-0.77116	-1.33143	-1.06736	-0.88228	-0.85046	PF3D7_1140700	1105	S	___1	LTES(0.999)EYDS(0.001)VYETLINR	4	RNNNIRKSYINKLTESEYDSVYETLINRYCK	PF11_0418
PF3D7_1107300	PAIP1	polyadenylate-binding protein-interacting protein 1, putative	No	0.37917	0.18949	0.11551	-0.14778	-0.15521	0.17591	0.22106	-1.48773	-1.10856	-1.3732	-1.18371	-1.20648	-1.09097	-1.06256	-1.21034	-1.20728	-1.36249	-1.31046	-1.13455	-1.35343	-1.13237	PF3D7_1107300	385	S	___1	S(0.911)S(0.086)VLS(0.001)S(0.001)LNADAPEFVPSTK	1	GNKKNETSSIKSLHKSSVLSSLNADAPEFVP	PF11_0086
PF3D7_0106400		pre-rRNA-processing protein TSR2, putative	No	0.37881	0.13755	0.09818	0.35358	0.24416	0.17229	0.03986	1.45506	1.83387	1.58609	1.72364	1.63537	1.73355	1.46877	1.82235	1.41164	1.6558	1.42442	1.59671	1.58761	1.62747	PF3D7_0106400	118	S	___1	NIQIYDISCS(1)QEK	10	ILEKIKNIQIYDISCSQEKNLIQNYEQGDEE	MAL1P1.55;PFA0315w
PF3D7_1428500		protein kinase, putative	No	0.37842	-0.04042	0.25503	0.19398	-0.0059	0.23046	0.14386	-1.45056	-1.07214	-1.36762	-1.40804	-1.5299	-1.27487	-1.67455	-1.48057	-1.70014	-1.70604	-1.56442	-1.33396	-1.71965	-1.57579	PF3D7_1428500	1362	S	___1	YNENDDYIS(1)NQK	9	ISSILAKYNENDDYISNQKKNKDSEIYLDVK	PF14_0264
PF3D7_1366900		conserved Plasmodium protein, unknown function	No	0.378376	-0.022162	-0.08326	0.367195	0.182518	-0.0933	-0.40604	-0.000705719	0.37767	0.686451	0.664289	0.32033	0.23707	0.0887451	0.45594	0.132681	0.315199	0.22662	0.13332	0.35737	-0.0486698	PF3D7_1366900	607	S	___1	Y(0.019)S(0.981)FNKNDDQK	2	MQQKGMNSSTGGHKYSFNKNDDQKNNNKMYK	MAL13P1.336
PF3D7_0918900	gammaGCS	gamma-glutamylcysteine synthetase	No	0.37823	0.07679	0.04173	0.31351	0.15882	0.15282	0.06802	2.68206	3.06029	2.52448	2.60127	2.52349	2.56522	2.58137	2.89488	2.59568	2.7545	2.43327	2.58609	2.59102	2.65904	PF3D7_0918900	1051	T	___2	T(0.001)IYEES(0.999)MDNT(1)VEFAK	10	CTCTRRTIYEESMDNTVEFAKKMYELSA___	PFI0925w
PF3D7_1039000	FIKK10.2	serine/threonine protein kinase, FIKK family	Yes	0.37798	-0.7177	0.34534	0.32772	0.03794	0.26048	0.3292	1.99413	2.37211	-1.08832	-1.80602	1.61459	1.95993	1.14248	1.4702	1.21765	1.25559	0.93906	1.19954	1.20515	1.53435	PF3D7_1039000	148	S	___1	S(1)NLYHNGK	1	YKKRRGKLREKKKGKSNLYHNGKNKKNVSNC	PF10_0380
PF3D7_0916700	HoMu	RNA-binding protein musashi, putative	No	0.377916	0.148089	0.355339	0.507435	0.259861	0.451179	0.227272	0.194695	0.572611	0.290861	0.43895	0.000471115	0.35581	0.132126	0.639561	0.0724392	0.3323	-0.149019	0.30216	-0.0496311	0.177641	PF3D7_0916700	273	S	___1	GYGFLT(0.001)FS(0.289)S(0.71)PR	9	DNEGKSKGYGFLTFSSPREAFKVMQQPERII	PFI0820c
PF3D7_1409900	CDS	cytidine diphosphate-diacylglycerol synthase	No	0.377726	0.495307	0.08123	0.485624	0.234398	0.23325	0.200842	-0.674265	-0.296539	-0.700439	-0.205132	-0.33296	-0.25173	-0.545944	-0.0603199	-0.460779	-0.226381	-0.3881	-0.15485	-0.475241	-0.274399	PF3D7_1409900	36	T	___3	KS(0.699)T(0.699)ES(0.699)S(0.721)T(0.182)VDEKGDIIK	3	FIEDKVLDDKKRKKSTESSTVDEKGDIIKRR	PF14_0097
PF3D7_1439500	ORP2	oocyst rupture protein 2, putative	No	0.37735	0.48085	-0.40897	-0.09996	-0.02338	0.449	-0.44127	-4.01612	-3.63877	-3.6022	-3.12135	-3.4436	-3.85257	-3.52866	-3.62862	-3.30595	-3.32933	-3.39151	-2.94251	-3.35867	-3.79994	PF3D7_1439500	630	S	___1	QNNIIINDY(0.462)S(0.536)PINNS(0.002)VQGNISQELINR	10	NNNMIKQNNIIINDYSPINNSVQGNISQELI	PF14_0374
PF3D7_1427600	MIT3	CorA-like Mg2+ transporter protein, putative	No	0.37731	0.06917	-0.05714	0.10564	0.09283	0.27788	-0.05259	-1.77348	-1.39617	-1.30074	-1.23157	-1.52457	-1.58171	-1.34219	-1.23655	-1.49866	-1.40583	-1.56129	-1.28341	-1.54923	-1.60182	PF3D7_1427600	62	S	___1	NFKDES(0.109)S(0.702)Y(0.151)MNY(0.038)IK	7	KNLMQRNEKNFKDESSYMNYIKRGFKRNSSE	PF14_0255
PF3D7_0107500	NCR1	lipid/sterol:H+ symporter	No	0.376901	-0.004061	0.298981	0.289957	0.06304	0.18595	0.31356	-1.0188	-0.641899	-0.68836	-0.692421	-1.01268	-0.713699	-0.936155	-0.646198	-0.908331	-0.845291	-1.00252	-0.81657	-1.20788	-0.89432	PF3D7_0107500	924	S	___2	S(0.001)S(0.001)GYDS(0.827)S(0.17)YNDLQSSSLPNPSSNEVLNK	6	ILLDRGDVIKSSGYDSSYNDLQSSSLPNPSS	MAL1P2.03;PFA0375c
PF3D7_1438400	MCA2	metacaspase-like protein	No	0.37687	0.01328	0.20405	0.17599	0.00466	-0.06718	0.34542	-2.37997	-2.0031	-2.02978	-2.0165	-2.46593	-2.26188	-2.09013	-1.91414	-2.36311	-2.35845	-2.12044	-2.18762	-2.36451	-2.01909	PF3D7_1438400	939	S	___1	APIT(0.029)IDENS(0.971)NKLDNNINYENVTK	9	NTINMNKAPITIDENSNKLDNNINYENVTKN	PF14_0362;PF14_0363
PF3D7_0319100	RBX1	E3 ubiquitin-protein ligase RBX1, putative	No	0.37684	-0.254063	0.09454	0.04147	0.21067	-0.33677	-0.17877	-1.67043	-1.29359	-0.709089	-0.963152	-1.23171	-1.13717	-1.09053	-1.04906	-1.30864	-1.09797	-0.75518	-1.09195	-1.03629	-1.21506	PF3D7_0319100	106	T	___1	QVCPLDNTTWEFQKAT(1)D	16	QVCPLDNTTWEFQKATD______________	MAL3P6.28;PFC0845c
PF3D7_0212100		conserved Plasmodium protein, unknown function	No	0.376795	-0.037441	0.193109	0.238806	-0.03973	0.025881	-0.05464	-0.544445	-0.16765	-0.19636	-0.233801	-0.517679	-0.32457	-0.624245	-0.385439	-0.400681	-0.440411	-0.44343	-0.417549	-0.38698	-0.44162	PF3D7_0212100	622	S	___1	KNS(0.5)T(0.5)ININNINK	3	NNNKKITKRGRAKKNSTININNINKMNSTNN	PF02_0113;PFB0540w
PF3D7_0212100		conserved Plasmodium protein, unknown function	No	0.376795	-0.037441	0.193109	0.238806	-0.03973	0.025881	-0.05464	-0.544445	-0.16765	-0.19636	-0.233801	-0.517679	-0.32457	-0.624245	-0.385439	-0.400681	-0.440411	-0.44343	-0.417549	-0.38698	-0.44162	PF3D7_0212100	623	T	___1	KNS(0.5)T(0.5)ININNINK	4	NNKKITKRGRAKKNSTININNINKMNSTNNK	PF02_0113;PFB0540w
PF3D7_1303500	NHE	sodium/hydrogen exchanger, Na+, H+ antiporter	No	0.37667	-0.11575	0.034439	-0.01596	-0.17052	-0.067309	0.11027	-2.18073	-1.80406	-1.34071	-1.45646	-0.817829	-0.78339	-1.05045	-1.06641	-1.05306	-1.22358	-0.75868	-0.825989	-0.91885	-0.80858	PF3D7_1303500	940	S	___1	HS(1)YNNVSNIR	2	GNEDTSDVYTYLNKHSYNNVSNIRGVYNYYY	PF13_0019
PF3D7_1140700		conserved Plasmodium protein, unknown function	No	0.37648	0.17912	0.45296	0.43296	0.11199	0.36269	0.38088	-2.9643	-2.58782	-3.24677	-3.06765	-3.0058	-2.55284	-3.16704	-2.73408	-3.18637	-3.07438	-2.9716	-2.60891	-3.17714	-2.79626	PF3D7_1140700	1109	S	___1	LTESEYDS(1)VYETLINR	8	IRKSYINKLTESEYDSVYETLINRYCKNTTN	PF11_0418
PF3D7_0718100	EST	exported serine/threonine protein kinase	Yes	0.37636	0.36207	0.67544	0.35741	0.53214	0.22578	0.61525	-2.73773	-2.36137	-2.77796	-2.41589	-3.20527	-2.52983	-2.72884	-2.37143	-3.17152	-2.63938	-2.76642	-2.54064	-3.25905	-2.6438	PF3D7_0718100	247	S	___1	WGS(1)DIINMMQTTNMNNLK	3	VMNSNPMNYNNGKWGSDIINMMQTTNMNNLK	MAL7P1.91
PF3D7_1407300	PRP38B	pre-mRNA-splicing factor 38B, putative	No	0.375985	-0.083332	-0.075869	0.426327	0.14007	0.0785007	-6.9e-05	0.153215	0.5292	0.627731	0.544399	0.15	0.074131	0.126755	0.553082	0.31489	0.45496	-0.0818996	-0.0033989	0.306509	0.30644	PF3D7_1407300	535	S	___2	DRS(1)INK	3	KHSSHYKSHNNHRDRSINKYNRPSEEDELYK	PF14_0070
PF3D7_1205500		zinc finger protein, putative	No	0.37553	-0.80008	0.23642	0.54462	-0.88311	-0.2365	0.28857	-5.36981	-4.99428	-4.21458	-5.01466	-3.82425	-3.58783	-3.96315	-3.41853	-3.54707	-4.43018	-4.04834	-4.28484	-3.88753	-3.59896	PF3D7_1205500	451	S	___2	S(0.002)LS(0.002)HINT(0.585)LNS(0.584)S(0.584)IIDNLT(0.204)QY(0.04)LQK	10	ITSNNKSLSHINTLNSSIIDNLTQYLQKELT	2277.t00056;MAL12P1.55;PFL0275w
PF3D7_1205500		zinc finger protein, putative	No	0.37553	-0.80008	0.23642	0.54462	-0.88311	-0.2365	0.28857	-5.36981	-4.99428	-4.21458	-5.01466	-3.82425	-3.58783	-3.96315	-3.41853	-3.54707	-4.43018	-4.04834	-4.28484	-3.88753	-3.59896	PF3D7_1205500	452	S	___2	S(0.002)LS(0.002)HINT(0.585)LNS(0.584)S(0.584)IIDNLT(0.204)QY(0.04)LQK	11	TSNNKSLSHINTLNSSIIDNLTQYLQKELTC	2277.t00056;MAL12P1.55;PFL0275w
PF3D7_1205500		zinc finger protein, putative	No	0.37553	-0.80008	0.23642	0.54462	-0.88311	-0.2365	0.28857	-5.36981	-4.99428	-4.21458	-5.01466	-3.82425	-3.58783	-3.96315	-3.41853	-3.54707	-4.43018	-4.04834	-4.28484	-3.88753	-3.59896	PF3D7_1205500	448	T	___2	S(0.002)LS(0.002)HINT(0.585)LNS(0.584)S(0.584)IIDNLT(0.204)QY(0.04)LQK	7	MNNITSNNKSLSHINTLNSSIIDNLTQYLQK	2277.t00056;MAL12P1.55;PFL0275w
PF3D7_0726500		ubiquitin carboxyl-terminal hydrolase, putative	No	0.37532	-0.21136	-0.56706	0.41003	0.05615	0.26153	-0.42194	-2.28621	-1.91089	-1.11497	-1.32633	-1.80967	-2.37673	-1.99603	-1.586	-1.87039	-1.81424	-2.33919	-2.07766	-1.58197	-2.00391	PF3D7_0726500	2441	S	___3	NQES(0.54)S(0.459)ILS(0.368)NS(0.633)NDEQDDDK	4	KTKKKKKNQNIKNQESSILSNSNDEQDDDKK	MAL7P1.147
PF3D7_0113200		Plasmodium exported protein, unknown function	Yes	0.37524	0.17937	0.370431	0.44235	0.19608	0.26449	0.03006	2.3792	2.75444	2.12937	2.30874	0.11797	0.488401	1.97844	2.42079	1.91649	2.11257	1.79088	2.05537	1.85914	1.8892	PF3D7_0113200	339	S	___2	SNNPPRQDS(1)QTSYYGR	9	YSRYTSRSNNPPRQDSQTSYYGRYTSRTNNQ	MAL1P3.08;PFA0630c
PF3D7_0307700		conserved Plasmodium protein, unknown function	No	0.37501	-0.25249	0.42937	0.35948	0.31655	0.88613	0.12591	-3.75335	-3.37834	-3.07079	-3.32328	-3.87412	-3.44475	-3.41687	-3.05739	-4.03527	-3.71872	-4.47241	-3.58628	-3.37182	-3.24591	PF3D7_0307700	832	S	___1	EESGEINNES(1)MNLES(1)GEEEYR	10	KSYKRREESGEINNESMNLESGEEEYRMMQK	MAL3P3.1;PFC0325c
PF3D7_0406500		NYN domain-containing protein, putative	No	0.374904	0.352117	0.337671	0.506447	0.2281	0.243921	0.001621	0.517756	0.89266	0.350941	0.703058	0.36097	0.698641	0.427395	0.933842	0.31653	0.54463	0.35195	0.595871	0.431219	0.43284	PF3D7_0406500	2808	S	___1	NDMGINS(0.419)S(0.581)EELENDSKK	8	PYKALLLKNDMGINSSEELENDSKKKQKQVS	MAL4P1.63;PFD0320c
PF3D7_1250200		CSC1-like protein, putative	No	0.37471	0.21278	-0.18598	0.50565	0.12204	0.08108	0.06468	-3.73589	-3.36118	-3.89971	-3.68693	-3.25121	-3.43719	-4.32415	-3.8185	-3.55983	-3.43779	-3.35293	-3.27185	-4.0808	-4.01612	PF3D7_1250200	374	S	___1	HHNQNQNNNQNDAY(0.02)S(0.919)NAS(0.061)K	15	KHHNQNQNNNQNDAYSNASKGVTIQANDKNV	2277.t00482;MAL12P1.480;PFL2410w
PF3D7_1200700	ACS7	acyl-CoA synthetase	Yes	0.37437	0.37906	-0.145599	0.36779	0.15696	0.11387	0.19582	2.43687	2.81124	2.45864	2.8377	0.36166	0.216061	2.94046	3.30825	2.59241	2.74937	3.18546	3.29933	2.49316	2.68898	PF3D7_1200700	875	S	___1	SEEKPVS(1)K	7	KEVESPVRKSEEKPVSKTVQKQLRKSAEKPI	2277.t00007;MAL12P1.7;PFL0035c
PF3D7_0606000	KIC1	conserved Plasmodium protein, unknown function	No	0.374207	0.166888	0.01055	-0.052843	0.13341	0.10595	0.27392	-0.812466	-0.438259	-0.480759	-0.313871	-0.592129	-0.581579	-0.673346	-0.726189	-0.58223	-0.44882	-0.71946	-0.61351	-0.718491	-0.444571	PF3D7_0606000	343	S	___2	FITFNTFDNHS(1)EGSVIFPMEK	11	KSDKKFITFNTFDNHSEGSVIFPMEKYRNFT	2270.t00255;MAL6P1.63;PFF0295c
PF3D7_0606000	KIC1	conserved Plasmodium protein, unknown function	No	0.374207	0.166888	0.01055	-0.052843	0.13341	0.10595	0.27392	-0.812466	-0.438259	-0.480759	-0.313871	-0.592129	-0.581579	-0.673346	-0.726189	-0.58223	-0.44882	-0.71946	-0.61351	-0.718491	-0.444571	PF3D7_0606000	346	S	___2	FIT(0.001)FNT(0.015)FDNHS(0.992)EGS(0.992)VIFPMEK	14	KKFITFNTFDNHSEGSVIFPMEKYRNFTLPS	2270.t00255;MAL6P1.63;PFF0295c
PF3D7_0601900		conserved Plasmodium protein, unknown function	Yes	0.37403	0.38073	0.33682	0.35817	0.22329	0.15811	0.02731	3.02209	3.39612	2.6858	3.06653	2.91643	3.25325	3.04174	3.39991	2.90128	3.12457	2.98131	3.13942	1.82184	1.84915	PF3D7_0601900	119	S	___2	SHSS(0.003)S(0.235)S(0.763)S(0.998)VYASANAEN	7	SSSSRQAARSHSSSSSVYASANAEN______	2270.t00296;MAL6P1.22;PFF0090w
PF3D7_0202000	KAHRP	knob-associated histidine-rich protein	Yes	0.37356	-0.05565	0.40419	0.34194	0.2546	0.56181	0.31196	3.36242	3.73598	3.26209	3.20644	1.51793	1.92212	3.55483	3.89677	3.48186	3.73646	2.41394	2.97575	3.46334	3.7753	PF3D7_0202000	494	S	___2	VDS(0.996)T(0.004)SADNK	3	ENETKNTAGENKKVDSTSADNKSTNAATPGA	PF02_0020;PFB0100c
PF3D7_1241200		conserved Plasmodium protein, unknown function	No	0.37354	0.01976	0.25554	-0.31443	-0.19956	-0.20974	-0.04026	-2.04296	-1.66942	-1.79639	-1.77663	-2.20513	-1.94959	-1.73491	-2.04934	-1.98792	-2.18748	-1.87189	-2.08163	-2.04156	-2.08182	PF3D7_1241200	868	Y	___1	IDQEDS(0.702)T(0.199)MS(0.268)DEY(0.831)NMNNDLYSNEYTNR	12	KKNKIDQEDSTMSDEYNMNNDLYSNEYTNRS	2277.t00396;MAL12P1.394;PFL1980c
PF3D7_0629800		cullin-like protein, putative	No	0.373281	0.134798	-0.0656	-0.034285	-0.240151	-0.047951	0.086342	-1.37284	-0.999559	-0.82477	-0.689972	-0.44379	-0.50939	-0.545635	-0.57992	-0.38331	-0.623461	-0.436609	-0.48456	-0.540571	-0.454229	PF3D7_0629800	861	S	___1	NFKEEGS(1)FDLGK	7	LCTLRVHFKNFKEEGSFDLGKRDDNNDEKRD	2270.t00185;MAL6P1.130;PFF1445c
PF3D7_1467600		conserved Plasmodium protein, unknown function	No	0.373175	0.229418	0.58398	0.665636	0.285779	0.45047	0.366879	-0.941315	-0.56814	-0.954819	-0.725401	-1.24295	-0.65897	-0.993355	-0.327719	-1.1773	-0.891521	-1.13632	-0.68585	-1.17566	-0.808781	PF3D7_1467600	386	S	___1	YILS(0.034)S(0.962)S(0.004)HEDEAK	5	KESKSSEDYEKYILSSSHEDEAKTWTIVQKS	PF14_0644
PF3D7_1219100	CHC	clathrin heavy chain, putative	No	0.37309	-0.03225	0.1003	0.16582	0.30375	-0.05245	-0.07238	-1.54362	-1.17053	-1.04508	-1.07733	-1.17118	-1.07088	-1.22754	-1.06172	-1.61357	-1.30982	-1.11752	-1.16997	-1.31448	-1.38686	PF3D7_1219100	1315	S	___1	NFHEFSS(0.002)HDS(0.804)T(0.172)VPY(0.018)Y(0.004)S(0.001)NNNNK	10	KNQKNKNFHEFSSHDSTVPYYSNNNNKDNIF	2277.t00186;MAL12P1.187;PFL0930w
PF3D7_0606000	KIC1	conserved Plasmodium protein, unknown function	No	0.373037	0.032617	-0.26919	0.310696	0.489149	0.131021	-0.170189	-0.392786	-0.0197487	0.234381	0.266998	-0.104599	-0.373789	0.00372505	0.314421	-0.315519	0.17363	-0.35638	-0.225359	0.0945892	-0.0755997	PF3D7_0606000	625	S	___1	S(0.5)KIS(0.5)DHGLNNDNVEQNICNLK	1	EDEDDNDNDNCRGQKSKISDHGLNNDNVEQN	2270.t00255;MAL6P1.63;PFF0295c
PF3D7_0818000	SNRNP27	conserved protein, unknown function	No	0.373017	0.352338	0.20952	0.495987	0.201769	0.31926	0.114891	-0.596846	-0.223829	-0.650249	-0.297911	-0.34169	-0.13217	-0.583916	-0.0879288	-0.508989	-0.30722	-0.538889	-0.219629	-0.663601	-0.54871	PF3D7_0818000	16	S	___1	T(0.443)S(0.557)EALES(0.885)T(0.115)ENNDKGNEENK	7	MFNVFFKSKTSEALESTENNDKGNEENKNDI	MAL8P1.71
PF3D7_1438400	MCA2	metacaspase-like protein	No	0.37299	0.25161	0.181	0.40966	0.29305	0.2203	0.1416	2.87845	3.25144	2.76351	3.01512	2.75437	2.93537	2.73104	3.1407	2.76045	3.0535	2.6278	2.8481	2.81928	2.96088	PF3D7_1438400;Q5JQC9	568;262	S	___1	ERIS(1)PR	4	KNVRSFSSFDVKERISPRVIRNGNINNNKNN	PF14_0362;PF14_0363
PF3D7_1033200	ETRAMP10.2	early transcribed membrane protein 10.2	Yes	0.37292	0.17776	-0.011339	0.28801	0.22327	0.16343	-0.102292	1.76188	2.1348	1.69206	1.86982	0.13706	0.125721	1.81249	2.1005	1.60526	1.82853	1.47216	1.63559	0.590281	0.487989	PF3D7_1033200	255	S	___1	RNS(0.011)S(0.989)EDKPTSESK	4	DMDPLNPYGSSKRNSSEDKPTSESKGTTPES	PF10_0323
PF3D7_0702500		Plasmodium exported protein, unknown function	Yes	0.372705	0.030157	0.111582	0.254206	0.249109	-0.0984	-0.05131	-0.746944	-0.374239	-0.625389	-0.595232	-0.9981	-0.886518	-0.636475	-0.382269	-0.57662	-0.327511	-0.99161	-1.09001	-0.90328	-0.95459	PF3D7_0702500	115	S	___1	NGFDLNDDT(0.021)T(0.156)NS(0.823)NNLGEGTHSAVHNLDGQK	12	IEKRNGFDLNDDTTNSNNLGEGTHSAVHNLD	PF07_0008
PF3D7_1013600		conserved Plasmodium protein, unknown function	No	0.372496	-0.007332	0.207891	0.176587	0.234939	0.01492	0.261739	-0.457335	-0.0848389	-0.78273	-0.790062	-1.02827	-0.820379	-0.611115	-0.434528	-0.6884	-0.453461	-1.08317	-1.06825	-0.77058	-0.508841	PF3D7_1013600	428	T	___1	RNT(1)NENIK	3	YSYNHLESHKKPKRNTNENIKERNKELYLSD	PF10_0133
PF3D7_1466800		conserved Plasmodium protein, unknown function	No	0.37241	0.16376	0.26884	0.4766	0.21354	0.2308	0.15119	1.55809	1.9305	1.97149	2.13525	1.96279	2.23163	1.97593	2.45253	1.86491	2.07845	2.17562	2.40642	1.90447	2.05566	PF3D7_1466800	623	T	___2	NDAYKY(0.004)S(0.998)T(0.998)DS(1)DDIER	8	SDLYNSMKNDAYKYSTDSDDIERRLTKGIEN	PF14_0636
PF3D7_0826100	HEUL	E3 ubiquitin-protein ligase, putative	No	0.372	0.09967	0.43607	0.28659	0.25533	0.18095	-0.04037	-1.87476	-1.50276	-1.73008	-1.63041	-1.79628	-1.36021	-1.91117	-1.62458	-1.80829	-1.55296	-1.80563	-1.62468	-1.77116	-1.81153	PF3D7_0826100	2841	S	___2	SSYSEFDDNS(0.454)S(0.547)DS(0.004)FS(0.211)S(0.761)AS(0.022)NR	16	SSYSEFDDNSSDSFSSASNRITDDIIISRNI	MAL8P1.23
PF3D7_1016300	GBP130	glycophorin binding protein	Yes	0.371825	0.547838	0.506591	0.431017	-0.0054703	0.4958	0.0429515	0.333055	0.70488	0.12055	0.668388	-0.0319805	0.474611	0.491714	0.922731	-0.0586109	-0.0640812	-0.156429	0.339371	-0.127571	-0.0846195	PF3D7_1016300	206	S	___1	VS(0.001)QKPS(0.953)T(0.044)S(0.002)TR	6	SKKQEPKASKVSQKPSTSTRSNNEVKIRAAS	PF10_0159
PF3D7_1021700		conserved Plasmodium membrane protein, unknown function	No	0.37094	0.19001	0.08894	0.15478	-0.32831	-0.22952	-0.07193	-2.53447	-2.16353	-2.087	-1.89699	-1.876	-1.78706	-1.93789	-1.78311	-1.67149	-1.9998	-1.47292	-1.70244	-1.74699	-1.81892	PF3D7_1021700	4818	S	___1	SLAPFFS(0.929)AS(0.071)K	7	CNEKYEHKKSLAPFFSASKGFNRFREKKKKK	PF10_0211;PF10_0212
PF3D7_1468100		conserved Plasmodium protein, unknown function	No	0.37085	0.28619	0.16473	-0.04252	0.41572	0.11871	0.14118	-4.0603	-3.68945	-3.94866	-3.66247	-3.54924	-3.38451	-3.45041	-3.49293	-4.15746	-3.74174	-4.0474	-3.92869	-3.95728	-3.8161	PF3D7_1468100	1073	S	___1	NHTHNNNNNNNNNS(0.835)S(0.164)EK	14	DKNHTHNNNNNNNNNSSEKNHNMHSNDKEYA	PF14_0649
PF3D7_0215300	ACS8	acyl-CoA synthetase	Yes	0.370825	0.127289	0.078399	0.27451	0.2297	0.2567	0.06011	-0.894245	-0.52342	-0.749399	-0.62211	-0.871309	-0.79291	-1.57327	-1.29876	-0.919371	-0.689671	-1.03795	-0.78125	-0.87299	-0.81288	PF3D7_0215300	855	S	___2	NT(0.009)LKS(0.521)T(0.521)DAS(0.949)LKIPEK	5	QQNNMSNITLKNTLKSTDASLKIPEKNKVQT	PF02_0144;PFB0695c
PF3D7_0215300	ACS8	acyl-CoA synthetase	Yes	0.370825	0.127289	0.078399	0.27451	0.2297	0.2567	0.06011	-0.894245	-0.52342	-0.749399	-0.62211	-0.871309	-0.79291	-1.57327	-1.29876	-0.919371	-0.689671	-1.03795	-0.78125	-0.87299	-0.81288	PF3D7_0215300	859	S	___2	NT(0.009)LKS(0.521)T(0.521)DAS(0.949)LKIPEK	9	MSNITLKNTLKSTDASLKIPEKNKVQTNKSR	PF02_0144;PFB0695c
PF3D7_0215300	ACS8	acyl-CoA synthetase	Yes	0.370825	0.127289	0.078399	0.27451	0.2297	0.2567	0.06011	-0.894245	-0.52342	-0.749399	-0.62211	-0.871309	-0.79291	-1.57327	-1.29876	-0.919371	-0.689671	-1.03795	-0.78125	-0.87299	-0.81288	PF3D7_0215300	856	T	___2	NT(0.009)LKS(0.521)T(0.521)DAS(0.949)LKIPEK	6	QNNMSNITLKNTLKSTDASLKIPEKNKVQTN	PF02_0144;PFB0695c
PF3D7_1449500	ApiAP2	AP2 domain transcription factor, putative	No	0.37082	-0.51312	-0.02141	0.55793	-0.16258	0.21052	0.26662	-2.55661	-2.18579	-2.479	-2.99212	-3.03367	-3.05508	-3.30482	-2.74689	-2.70507	-2.86765	-3.40217	-3.19165	-2.84663	-2.58001	PF3D7_1449500	31	S	___2	AS(1)EIVES(0.579)DMY(0.424)ES(0.928)NEDS(0.061)NT(0.009)K	2	ENDSHLVKNTSYEKASEIVESDMYESNEDSN	PF14_0471
PF3D7_1209400	CIA1	cytosolic iron-sulfur protein assembly protein 1, putative	No	0.37039	0.22158	0.14814	0.21864	0.09994	0.27193	0.0638	2.6652	3.03559	2.5613	2.78288	2.55282	2.70096	2.68093	2.89957	2.85096	2.9509	2.28191	2.55384	2.80145	2.86525	PF3D7_1209400	237	S	___1	NGDS(1)VKNDDIYK	4	NGDSVKNGDSVKNGDSVKNDDIYKNDDRVKN	2277.t00095;MAL12P1.94;PFL0470w
PF3D7_1246900	PKB	RAC-beta serine/threonine protein kinase	No	0.370356	0.386318	0.24576	0.777431	0.445628	0.613951	0.298	-0.695736	-0.32538	-0.97085	-0.584532	-0.84507	-0.59931	-1.10716	-0.329729	-1.06858	-0.622952	-1.04027	-0.426319	-1.09744	-0.79944	PF3D7_1246900	197	S	___1	RDIS(1)LEK	4	KREDPSKNIHDKRDISLEKNIINYNKYDMQF	2277.t00450;MAL12P1.449;PFL2250c
PF3D7_0318200	RPB1	DNA-directed RNA polymerase II subunit RPB1	No	0.3703	0.17685	0.34629	-0.33423	-0.31286	-0.10717	-0.04648	-2.31915	-1.94885	-2.3004	-2.12355	-2.24202	-1.89573	-2.28446	-2.61869	-2.17223	-2.48509	-2.17499	-2.28216	-2.18753	-2.23401	PF3D7_0318200	2292	S	___2	NQNDQMNVNS(0.028)QY(0.677)NVMS(0.281)PVY(0.012)S(0.003)VT(0.154)S(0.844)PK	23	VNSQYNVMSPVYSVTSPKYSPTSPKYSPTSP	MAL3P6.20;PFC0805w
PF3D7_0318200	RPB1	DNA-directed RNA polymerase II subunit RPB1	No	0.3703	0.17685	0.34629	-0.33423	-0.31286	-0.10717	-0.04648	-2.31915	-1.94885	-2.3004	-2.12355	-2.24202	-1.89573	-2.28446	-2.61869	-2.17223	-2.48509	-2.17499	-2.28216	-2.18753	-2.23401	PF3D7_0318200	2281	Y	___2	NQNDQMNVNS(0.028)QY(0.677)NVMS(0.281)PVY(0.012)S(0.003)VT(0.154)S(0.844)PK	12	TSPKNQNDQMNVNSQYNVMSPVYSVTSPKYS	MAL3P6.20;PFC0805w
PF3D7_0403200		conserved Plasmodium protein, unknown function	No	0.36977	-0.1952	0.03465	0.19619	0.40393	-0.32823	0.18628	-2.54242	-2.17265	-2.55689	-2.75209	-2.38951	-2.35486	-2.64649	-2.4503	-3.08001	-2.67608	-2.45171	-2.77994	-2.62231	-2.43603	PF3D7_0403200	488	Y	___3	ENHDNLNS(0.436)AS(0.482)NEHVS(0.412)Y(0.445)ES(0.375)DT(0.347)Y(0.502)ENNK	21	LNSASNEHVSYESDTYENNKNDKEINSQSDK	MAL4P1.30;PFD0150w
PF3D7_1466800		conserved Plasmodium protein, unknown function	No	0.36965	0.18649	0.28932	0.42787	0.19864	0.27585	0.13329	2.25385	2.6235	2.40833	2.59482	2.39656	2.68588	2.4625	2.89037	2.37654	2.57518	2.53663	2.81248	2.40559	2.53888	PF3D7_1466800	625	S	___2	NDAY(0.001)KY(0.034)S(0.969)T(0.995)DS(1)DDIERR	10	LYNSMKNDAYKYSTDSDDIERRLTKGIENEK	PF14_0636
PF3D7_1149000	Pf332	antigen 332, DBL-like protein	Yes	0.36959	0.46516	0.45376	0.21535	0.46592	0.49503	0.40104	3.46692	3.83651	2.60241	3.06757	2.77043	3.22419	3.04737	3.26272	2.76045	3.22637	2.47377	2.9688	2.51809	2.91913	PF3D7_1149000	1532	T	___1	EGS(0.13)VT(0.87)EQLVEEEK	5	DSVKDQNVFEKEGSVTEQLVEEEKGLINEDN	PF11_0506;PF11_0507
PF3D7_1013900		translation initiation factor eIF-2B subunit delta, putative	No	0.369526	0.126078	0.11969	0.157326	0.162128	-0.08926	0.0136204	-0.00981522	0.359711	0.240711	0.366789	-0.0679893	0.0517006	-0.019455	0.137871	-0.0680294	0.094099	-0.028429	-0.117689	-0.00856018	0.0050602	PF3D7_1013900	177	S	___2	TLNSCLLNECPHFS(1)DS(0.545)S(0.454)NLEY(0.001)RDEER	14	AKTLNSCLLNECPHFSDSSNLEYRDEERKKN	PF10_0136
PF3D7_1013900		translation initiation factor eIF-2B subunit delta, putative	No	0.369526	0.126078	0.11969	0.157326	0.162128	-0.08926	0.0136204	-0.00981522	0.359711	0.240711	0.366789	-0.0679893	0.0517006	-0.019455	0.137871	-0.0680294	0.094099	-0.028429	-0.117689	-0.00856018	0.0050602	PF3D7_1013900	179	S	___2	T(0.001)LNS(0.018)CLLNECPHFS(0.956)DS(0.546)S(0.479)NLEYRDEER	16	TLNSCLLNECPHFSDSSNLEYRDEERKKNDG	PF10_0136
PF3D7_1129100	PV1	parasitophorous vacuolar protein 1	Yes	0.36914	0.4185	-0.01696	0.35832	0.0475	-0.16592	-0.04885	-1.71838	-1.34924	-1.81564	-1.39714	-1.73136	-1.74832	-1.70374	-1.34542	-2.14926	-2.10176	-1.44893	-1.61485	-1.73815	-1.787	PF3D7_1129100	216	S	___1	DSLILNENNNDS(0.964)LT(0.029)S(0.006)ADQK	12	LSQKDSLILNENNNDSLTSADQKNNNMVPME	PF11_0302
PF3D7_1434500		dynein-related AAA-type ATPase, putative	No	0.36884	0.28326	-0.22064	0.13325	0.01481	0.11643	-0.41967	-1.65317	-1.28433	-1.44387	-1.16061	-1.21655	-1.43719	-1.33131	-1.19806	-1.32119	-1.30638	-1.23458	-1.11815	-1.12172	-1.54139	PF3D7_1434500	7014	S	___1	NKS(0.969)NDFNIS(0.031)HDNITK	3	ENDLTNIDDVFERNKSNDFNISHDNITKDLN	PF14_0326
PF3D7_0202000	KAHRP	knob-associated histidine-rich protein	Yes	0.36841	0.32342	0.60076	0.73823	0.24559	0.39968	-0.044468	1.32923	1.69764	1.20174	1.52516	1.98116	2.58192	1.56026	2.29849	1.38061	1.6262	1.88989	2.28957	0.650299	0.605831	PF3D7_0202000	589	T	___3	EAS(0.997)T(0.993)T(0.01)EGATK	4	TKEASTSKGATKEASTTEGATKGASTTAGST	PF02_0020;PFB0100c
PF3D7_1417200		NOT family protein, putative	No	0.368327	0.348268	0.48913	0.368447	0.24068	0.229739	0.226311	-0.645226	-0.276899	-0.560989	-0.212721	-0.81259	-0.32346	-0.675896	-0.307449	-0.6541	-0.41342	-0.482489	-0.25275	-0.70627	-0.479959	PF3D7_1417200	783	T	___1	FEES(0.004)NIT(0.996)PK	7	FLSGTMNPKFEESNITPKNGLHYEMLNNKEI	PF14_0170
PF3D7_0802000	GDH3	glutamate dehydrogenase, putative	No	0.368136	-0.150381	-0.072898	0.445615	0.066618	-0.02384	0.18305	-0.878815	-0.510679	-0.464979	-0.61536	-0.69068	-0.763578	-0.859035	-0.41342	-0.931629	-0.865011	-0.784109	-0.807949	-1.14794	-0.96489	PF3D7_0802000	814	S	___1	RCDNVS(0.946)NS(0.054)NYNYVNGTTEDAVQK	6	NRKNEENERKRCDNVSNSNYNYVNGTTEDAV	PF08_0132
PF3D7_0714200		conserved Plasmodium protein, unknown function	No	0.367836	-0.070072	-0.03562	-0.024494	0.503609	0.055589	-0.0029888	-0.0971451	0.270691	-0.211199	-0.281271	-0.71874	-0.75436	-0.206896	-0.23139	-0.45229	0.0513191	-0.543369	-0.48778	0.0740299	0.0710411	PF3D7_0714200	1321	T	___2	T(0.043)S(0.047)NIMRINT(0.43)T(0.48)ALNT(0.527)S(0.473)K	14	SKTSNIMRINTTALNTSKNYTTDLYQTNKSR	PF07_0056
PF3D7_1023900	CHD1	chromodomain-helicase-DNA-binding protein 1 homolog, putative	No	0.367256	0.310709	0.024191	0.287176	0.072939	-0.012979	0.194161	-0.735176	-0.36792	-0.61624	-0.305531	-0.4429	-0.418709	-0.656225	-0.369049	-0.71983	-0.646891	-0.41391	-0.426889	-0.68285	-0.488689	PF3D7_1023900	34	S	___1	KNLT(0.5)S(0.5)NFMGQVNNNK	5	KNNESENSIMKKNLTSNFMGQVNNNKNSTCS	PF10_0232
PF3D7_0401800	PfD80	Plasmodium exported protein (PHISTb), unknown function	Yes	0.366985	0.07759	0.20801	0.220326	0.186878	0.24571	-0.021761	0.819185	1.18617	1.25861	1.3362	3.34074	3.54875	0.913774	1.1341	0.657681	0.844559	1.13173	1.37744	0.12915	0.107389	PF3D7_0401800	183	S	___1	SASTASTASAASAAS(0.99)T(0.01)TR	15	RSASTASTASAASAASTTRSASAASTTRSAS	MAL4P1.16;PFD0080c
PF3D7_0202000	KAHRP	knob-associated histidine-rich protein	Yes	0.36697	-0.3062	0.13719	0.17886	0.08229	-0.05161	0.05915	-2.67195	-2.30498	-2.777	-3.0832	-2.98241	-2.84522	-2.83957	-2.66071	-3.03306	-2.95077	-3.46789	-3.5195	-2.89202	-2.83287	PF3D7_0202000	188	S	___1	YEAANYAFS(1)EECPYTVNDYSQENGPNIFALR	9	KKDCDEKYEAANYAFSEECPYTVNDYSQENG	PF02_0020;PFB0100c
PF3D7_1200800	FIKK12	serine/threonine protein kinase, FIKK family	Yes	0.36691	0.57781	0.30143	0.99905	0.43427	0.49457	-0.25581	-4.42142	-4.05451	-3.77848	-3.20067	-3.81374	-3.51231	-3.62438	-2.62533	-3.75222	-3.31795	-3.44882	-2.95425	-3.26785	-3.52366	PF3D7_1200800	509	S	___1	T(0.048)S(0.048)FPS(0.846)ES(0.059)VNFTTFLENNMNLSCYPSTK	5	IWIWNCGHMWKTSFPSESVNFTTFLENNMNL	2277.t00008;MAL12P1.8;PFL0040c
PF3D7_0730300	ApiAP2	AP2 domain transcription factor AP2-L, putative	No	0.366876	0.193018	0.01561	0.305606	0.23399	0.17918	0.193341	-0.747135	-0.380259	-0.46699	-0.273972	-0.585949	-0.570339	-0.551355	-0.245749	-0.50964	-0.27565	-0.5431	-0.36392	-0.58433	-0.390989	PF3D7_0730300	898	S	___2	CNQDS(0.023)Y(0.001)S(0.887)T(0.093)NEEPLS(0.959)NHS(0.038)INDPGK	14	NRCNQDSYSTNEEPLSNHSINDPGKIKDGIM	PF07_0126
PF3D7_1228400		conserved Plasmodium protein, unknown function	No	0.366867	0.0601291	0.175239	0.0686269	0.06321	0.0914	0.146332	-0.326456	0.040411	0.0330296	0.0931587	0.179331	0.35457	0.0782051	0.146832	0.128639	0.191849	0.13208	0.22348	0.195669	0.342001	PF3D7_1228400	149	S	___1	KQS(0.813)FNDS(0.187)INNCNVDIYK	3	SCDIKNEQDVMIKKQSFNDSINNCNVDIYKK	2277.t00275;MAL12P1.275;PFL1375w
PF3D7_0817300		conserved Plasmodium protein, unknown function	No	0.366837	0.051788	0.10659	0.193746	0.48764	0.25129	0.117071	-0.0485859	0.318251	0.135601	0.187389	-0.0362492	0.0703411	0.0182648	0.212011	-0.0917702	0.39587	-0.125729	0.125561	-0.0377808	0.0792904	PF3D7_0817300	159	S	___1	NIIVIDDS(0.983)LPNNS(0.372)NS(0.332)T(0.314)FDDKEK	8	DEYLNQNKNIIVIDDSLPNNSNSTFDDKEKT	PF08_0060
PF3D7_1337400		conserved Plasmodium protein, unknown function	No	0.36644	-0.23472	-0.03585	-0.02071	0.27567	-0.15551	0.25148	-2.00418	-1.63774	-1.39247	-1.62719	-1.61831	-1.65416	-1.71661	-1.73732	-1.773	-1.49733	-1.46263	-1.61814	-1.79208	-1.5406	PF3D7_1337400	584	S	___1	CNVIS(0.002)IADEEQEDT(0.097)PS(0.901)	16	CNVISIADEEQEDTPS_______________	PF13_0209
PF3D7_0202000	KAHRP	knob-associated histidine-rich protein	Yes	0.36617	0.05024	-0.0576	0.49488	0.07285	0.28614	-0.01271	5.37103	5.7372	4.93349	4.98373	3.38975	3.33215	5.74252	6.2374	5.51289	5.58574	5.5056	5.79174	5.23561	5.2229	PF3D7_0202000	634	S	___1	NAANNGEQVMS(1)RGQAQLQEAGKK	11	ETADKNAANNGEQVMSRGQAQLQEAGKKKKK	PF02_0020;PFB0100c
PF3D7_1149000	Pf332	antigen 332, DBL-like protein	Yes	0.36615	-0.05757	-0.23614	0.55716	-0.20547	0.42743	0.6056	-4.13153	-3.76538	-4.08532	-4.14289	-4.49418	-4.73032	-5.00455	-4.44739	-6.03592	-6.24139	-5.02917	-4.60174	-4.81122	-4.20562	PF3D7_1149000	2366	S	___2	VS(0.226)VHEGS(0.25)T(0.262)T(0.275)EQILDES(0.98)VAEEIVEEEVS(0.007)VDDK	16	VSVHEGSTTEQILDESVAEEIVEEEVSVDDK	PF11_0506;PF11_0507
PF3D7_0802000	GDH3	glutamate dehydrogenase, putative	No	0.36613	-0.94505	-0.3629	-0.72839	-0.0947	0.65427	0.03471	-4.14563	-3.7795	-3.22561	-4.17066	-3.66558	-4.02848	-3.29739	-4.02578	-3.85007	-3.94477	-4.72776	-4.07349	-3.74201	-3.7073	PF3D7_0802000	393	S	___1	NYNNNIMDTTTNS(0.002)S(0.016)S(0.105)S(0.721)PS(0.078)S(0.078)VLNDVYIIK	16	NYNNNIMDTTTNSSSSPSSVLNDVYIIKEKL	PF08_0132
PF3D7_1119900	SEC16	conserved Plasmodium protein, unknown function	No	0.36595	-0.242762	0.30113	0.389482	0.02435	-0.09398	0.0405	-1.45132	-1.08537	-0.63459	-0.877352	-1.50711	-1.20598	-1.22878	-0.839298	-1.33047	-1.30612	-1.23165	-1.32563	-1.44112	-1.40062	PF3D7_1119900	1313	T	___1	NKT(1)IHVQTQENINEYFNIK	3	NINVFNNSPIHNRNKTIHVQTQENINEYFNI	PF11_0206
PF3D7_0703200		conserved Plasmodium protein, unknown function	No	0.365835	-0.081912	0.096569	-0.151276	0.097969	-0.01103	-0.009411	-0.970285	-0.60445	-0.5923	-0.674212	-0.748449	-0.65188	-0.480354	-0.63163	-0.825109	-0.72714	-0.50889	-0.51992	-0.57461	-0.584021	PF3D7_0703200	356	S	___1	NKNS(0.987)DINY(0.013)HK	4	KNMNIDDKNNVKNKNSDINYHKRNTMDDCCD	PF07_0012
PF3D7_0519400	RPS24	40S ribosomal protein S24	No	0.365811	-0.068491	0.099751	0.068555	0.1031	-0.0781	-0.092619	-1.10822	-0.742409	-0.74197	-0.810461	-0.81584	-0.716089	-0.592525	-0.52397	-0.811871	-0.708771	-0.342449	-0.420549	-0.52511	-0.617729	PF3D7_0519400	14	S	___1	YMS(1)NPLLR	3	__MTDQFTIRVKKYMSNPLLRRKQFALEILH	MAL5P1.195;PFE0975c
PF3D7_0500800	MESA	mature parasite-infected erythrocyte surface antigen	Yes	0.36569	0.29496	0.55586	0.38317	0.31725	0.43134	0.18751	5.93684	6.30253	5.39407	5.68903	5.42703	5.98289	5.71269	6.09586	5.33357	5.65082	5.27269	5.70403	5.57121	5.75872	PF3D7_0500800	448	T	___1	NIET(1)DDEEET(1)LVVKDDAK	4	FQMLGCNFLCNKNIETDDEEETLVVKDDAKK	MAL5P1.9;PFE0040c
PF3D7_1468700	eIF4A	eukaryotic initiation factor 4A	No	0.36551	0.19627	-0.11045	0.2715	0.18998	0.26645	-0.11006	-2.58461	-2.2191	-2.39517	-2.1989	-2.43317	-2.54362	-2.55147	-2.27997	-2.51494	-2.32496	-2.46799	-2.20154	-2.53559	-2.64565	PF3D7_1468700	18	T	___2	EETFNNENDIEGNT(1)EEIVDTFDALGLNEK	14	TKEETFNNENDIEGNTEEIVDTFDALGLNEK	PF14_0655
PF3D7_0717500	CDPK4	calcium-dependent protein kinase 4	No	0.36508	0.26628	-0.09213	-0.3427	-0.09507	-0.27625	-0.35142	-3.62783	-3.26275	-3.29592	-3.02964	-3.04371	-3.13584	-3.11907	-3.46177	-3.13849	-3.23356	-2.68468	-2.96093	-2.6908	-3.04222	PF3D7_0717500	343	S	___1	DNLNIDIPS(0.631)LELS(0.369)IANIR	9	IKMMTSKDNLNIDIPSLELSIANIRQFQSTQ	PF07_0072
PF3D7_0503300	SRSF12	serine/arginine-rich splicing factor 12	No	0.364815	0.080029	-0.07578	-0.143355	-0.110231	0.36316	-0.041929	-0.979595	-0.61478	-0.802929	-0.7229	-1.04587	-1.12165	-0.723825	-0.86718	-0.57741	-0.687641	-1.10031	-0.73715	-0.84207	-0.883999	PF3D7_0503300	225	S	___1	S(0.976)KY(0.019)NHS(0.005)NDDYS(1)DETR	1	SRRASRHEKRNENYKSKYNHSNDDYSDETRN	MAL5P1.33;PFE0160c
PF3D7_0706500		conserved Plasmodium protein, unknown function	No	0.364524	0.13494	0.313731	0.455184	0.173759	0.26568	0.137251	-0.695644	-0.33112	-0.57309	-0.43815	-0.83643	-0.522699	-0.914804	-0.45962	-0.844259	-0.6705	-0.92268	-0.657	-0.822271	-0.68502	PF3D7_0706500	1582	S	___2	SNELEGEGINLS(1)EQGGENITDLDKK	12	KDEKSNELEGEGINLSEQGGENITDLDKKKT	MAL7P1.204
PF3D7_0706500		conserved Plasmodium protein, unknown function	No	0.364524	0.13494	0.313731	0.455184	0.173759	0.26568	0.137251	-0.695644	-0.33112	-0.57309	-0.43815	-0.83643	-0.522699	-0.914804	-0.45962	-0.844259	-0.6705	-0.92268	-0.657	-0.822271	-0.68502	PF3D7_0706500	1590	T	___2	SNELEGEGINLSEQGGENIT(1)DLDKK	20	EGEGINLSEQGGENITDLDKKKTYKMDKKNK	MAL7P1.204
PF3D7_0401800	PfD80	Plasmodium exported protein (PHISTb), unknown function	Yes	0.364256	0.312568	0.03592	0.485706	0.176958	0.228839	0.15097	0.716644	1.0809	0.59289	0.905458	1.62926	1.66518	0.510105	0.995811	0.803301	0.980259	0.906441	1.13528	0.54353	0.6945	PF3D7_0401800	142	S	___3	SAS(0.001)AAS(0.948)T(0.043)T(0.015)RS(0.964)AS(0.028)AASTTR	10	AASTTRSASAASTTRSASAASTTRSASAAST	MAL4P1.16;PFD0080c
PF3D7_0401800	PfD80	Plasmodium exported protein (PHISTb), unknown function	Yes	0.36417	0.39916	0.22027	0.871535	0.19339	0.48014	0.014111	1.4286	1.79277	1.09126	1.49042	1.11344	1.33371	0.977015	1.84855	1.01621	1.2096	1.11619	1.59633	0.91357	0.927681	PF3D7_0401800	82	S	___2	SPSTASTSTS(1)LR	10	ASTTKRSPSTASTSTSLRSASTASTASTLRS	MAL4P1.16;PFD0080c
PF3D7_0501400	FIRA	interspersed repeat antigen	Yes	0.36401	-0.00634	0.04675	0.15275	0.13335	0.14214	-0.235	2.15668	2.52069	-1.04749	-1.05383	2.29693	2.34368	2.42451	2.57726	2.43434	2.56769	1.96255	2.10469	2.59834	2.36334	PF3D7_0501400	440	S	___1	KS(0.136)S(0.864)WLK	3	SEETQEKSHTKKKKSSWLKFGRGNKNDKKNK	MAL5P1.15;PFE0070w
PF3D7_0217600		conserved Plasmodium protein, unknown function	No	0.3637	0.17173	-0.00349	-0.16815	0.12452	0.03801	-0.04593	-1.33817	-0.97447	-1.31211	-1.14038	-1.39473	-1.39822	-1.14461	-1.31276	-1.31936	-1.19484	-1.24485	-1.20684	-1.14935	-1.19528	PF3D7_0217600	1630	S	___2	Y(0.021)AS(0.978)S(0.926)T(0.591)T(0.483)DIYIKEK	4	LSPIYQNLVEYKYASSTTDIYIKEKNYFSKK	PF02_0167;PFB0820c
PF3D7_0217600		conserved Plasmodium protein, unknown function	No	0.3637	0.17173	-0.00349	-0.16815	0.12452	0.03801	-0.04593	-1.33817	-0.97447	-1.31211	-1.14038	-1.39473	-1.39822	-1.14461	-1.31276	-1.31936	-1.19484	-1.24485	-1.20684	-1.14935	-1.19528	PF3D7_0217600	1631	T	___2	Y(0.011)AS(0.45)S(0.554)T(0.636)T(0.345)DIY(0.004)IK	5	SPIYQNLVEYKYASSTTDIYIKEKNYFSKKK	PF02_0167;PFB0820c
PF3D7_0418600		regulator of chromosome condensation, putative	No	0.3637	0.09581	0.24275	0.05847	-0.08458	0.16559	-0.24457	-2.23256	-1.86886	-1.55165	-1.45584	-1.74527	-1.50252	-1.70619	-1.64772	-1.50893	-1.59351	-1.50269	-1.3371	-1.40364	-1.64821	PF3D7_0418600	901	S	___1	Y(0.001)S(0.53)S(0.468)CDEKY(0.001)QNHK	2	ADSFTFSKKNENNKYSSCDEKYQNHKNHETD	MAL4P1.175;PFD0900w
PF3D7_0705100		conserved Plasmodium protein, unknown function	No	0.36369	-0.26001	0.07674	0.04518	-0.04854	-0.06534	0.00708	-2.11833	-1.75464	-2.36514	-2.62515	-2.17849	-2.10175	-2.16498	-2.1198	-2.18781	-2.23635	-2.57723	-2.64257	-2.1837	-2.17662	PF3D7_0705100	2	S	___2	S(1)IHIS(1)DEEAEGR	1	______________MSIHISDEEAEGRNFDQ	PF07_0021
PF3D7_0705100		conserved Plasmodium protein, unknown function	No	0.36369	-0.26001	0.07674	0.04518	-0.04854	-0.06534	0.00708	-2.11833	-1.75464	-2.36514	-2.62515	-2.17849	-2.10175	-2.16498	-2.1198	-2.18781	-2.23635	-2.57723	-2.64257	-2.1837	-2.17662	PF3D7_0705100	6	S	___2	S(1)IHIS(1)DEEAEGR	5	__________MSIHISDEEAEGRNFDQKNKI	PF07_0021
PF3D7_1303500	NHE	sodium/hydrogen exchanger, Na+, H+ antiporter	No	0.36351	0.05962	0.02197	0.133621	0.103929	-0.033311	-0.00508	-1.36646	-1.00295	-1.12919	-1.06957	-0.951509	-0.929539	-1.02288	-0.889259	-1.07426	-0.970331	-0.992859	-1.02617	-0.9216	-0.92668	PF3D7_1303500	1598	T	___2	NNTADFT(0.012)PQRY(0.171)DT(0.904)DQT(0.912)INFECIEEMCQK	13	LPRNNTADFTPQRYDTDQTINFECIEEMCQK	PF13_0019
PF3D7_1303500	NHE	sodium/hydrogen exchanger, Na+, H+ antiporter	No	0.36351	0.05962	0.02197	0.133621	0.103929	-0.033311	-0.00508	-1.36646	-1.00295	-1.12919	-1.06957	-0.951509	-0.929539	-1.02288	-0.889259	-1.07426	-0.970331	-0.992859	-1.02617	-0.9216	-0.92668	PF3D7_1303500	1601	T	___2	NNTADFT(0.012)PQRY(0.171)DT(0.904)DQT(0.912)INFECIEEMCQK	16	NNTADFTPQRYDTDQTINFECIEEMCQKRHG	PF13_0019
PF3D7_1450700		conserved Plasmodium protein, unknown function	No	0.363386	-0.010962	-0.28116	-0.185974	0.028578	-0.207569	-0.244239	-0.630146	-0.26676	-0.308519	-0.319481	-0.210749	-0.491909	-0.203545	-0.389519	-0.287359	-0.258781	-0.333	-0.540569	-0.153561	-0.3978	PF3D7_1450700	488	S	___2	S(0.296)Y(0.284)ELDKS(0.754)S(0.754)NS(0.956)S(0.956)IIKHEK	7	RVIKNVENKSYELDKSSNSSIIKHEKTDKGN	PF14_0482
PF3D7_1450700		conserved Plasmodium protein, unknown function	No	0.363386	-0.010962	-0.28116	-0.185974	0.028578	-0.207569	-0.244239	-0.630146	-0.26676	-0.308519	-0.319481	-0.210749	-0.491909	-0.203545	-0.389519	-0.287359	-0.258781	-0.333	-0.540569	-0.153561	-0.3978	PF3D7_1450700	491	S	___2	S(0.296)Y(0.284)ELDKS(0.754)S(0.754)NS(0.956)S(0.956)IIKHEK	10	KNVENKSYELDKSSNSSIIKHEKTDKGNHRR	PF14_0482
PF3D7_0202000	KAHRP	knob-associated histidine-rich protein	Yes	0.36331	0.007417	0.347681	0.203085	0.373728	-0.039011	0.1079	-1.09902	-0.73571	-0.572479	-0.565062	-1.08135	-0.733669	-0.915625	-0.71254	-0.954809	-0.581081	-0.381699	-0.42071	-0.657501	-0.549601	PF3D7_0202000	521	T	___1	T(0.006)DKT(0.991)GAS(0.001)T(0.002)NAATNK	4	TPGAKDKTQGGKTDKTGASTNAATNKGQCAA	PF02_0020;PFB0100c
PF3D7_0411900		DNA polymerase alpha catalytic subunit A	No	0.3633	0.0229	-0.13895	0.00052	0.14041	-0.18257	0.19488	-2.84264	-2.47934	-3.42445	-3.40155	-3.54028	-3.67923	-3.1368	-3.13628	-3.3325	-3.19209	-3.76245	-3.94502	-3.08075	-2.88587	PF3D7_0411900	60	S	___1	S(0.003)LQNFIVGGDKDFDS(0.939)S(0.939)DDVIVENINFT(0.12)LLK	15	RSLQNFIVGGDKDFDSSDDVIVENINFTLLK	MAL4P2.51;PFD0590c
PF3D7_0411900		DNA polymerase alpha catalytic subunit A	No	0.3633	0.0229	-0.13895	0.00052	0.14041	-0.18257	0.19488	-2.84264	-2.47934	-3.42445	-3.40155	-3.54028	-3.67923	-3.1368	-3.13628	-3.3325	-3.19209	-3.76245	-3.94502	-3.08075	-2.88587	PF3D7_0411900	61	S	___1	S(0.003)LQNFIVGGDKDFDS(0.939)S(0.939)DDVIVENINFT(0.12)LLK	16	SLQNFIVGGDKDFDSSDDVIVENINFTLLKK	MAL4P2.51;PFD0590c
PF3D7_0730800		Plasmodium exported protein, unknown function, unspecified product	Yes	0.362341	-0.00564	-0.13143	0.076656	0.333799	-0.035081	0.16772	-1.10108	-0.738739	-0.6646	-0.67024	-0.81217	-0.9436	-0.580545	-0.503889	-0.98278	-0.648981	-0.989859	-1.02494	-0.8423	-0.67458	PF3D7_0730800;PF3D7_0730800	182;182	S	___1	S(0.015)FGGDFS(0.965)NT(0.02)VQGATGIPGK	7	KDGFKNIMKSFGGDFSNTVQGATGIPGKLFK	MAL7P1.170;PF3D7_0730800.1;PF3D7_0730800.2
PF3D7_0501400	FIRA	interspersed repeat antigen	Yes	0.362256	-0.00783	0.486861	0.568435	0.527948	0.74312	0.07345	0.162725	0.524981	1.35475	1.34692	-0.183369	0.303492	0.218836	0.787271	0.10857	0.636518	-0.278629	0.464491	0.29826	0.37171	PF3D7_0501400	1193	S	___2	KAS(0.652)EGDNHS(0.348)LS(0.175)S(0.822)LS(0.002)EETEEK	12	DDEKKASEGDNHSLSSLSEETEEKSHTKKKK	MAL5P1.15;PFE0070w
PF3D7_1305900		conserved Plasmodium protein, unknown function	No	0.362235	0.249738	0.149752	0.376486	0.151399	0.216471	0.150661	0.647575	1.00981	0.504061	0.753799	0.609489	0.759241	0.477205	0.853691	0.55477	0.706169	0.35367	0.570141	0.478159	0.62882	PF3D7_1305900	191	S	___2	IS(1)IT(1)PPRDNGMEWPDDLDLR	2	GMQDENNIISKMRKISITPPRDNGMEWPDDL	PF13_0031
PF3D7_1305900		conserved Plasmodium protein, unknown function	No	0.362235	0.249738	0.149752	0.376486	0.151399	0.216471	0.150661	0.647575	1.00981	0.504061	0.753799	0.609489	0.759241	0.477205	0.853691	0.55477	0.706169	0.35367	0.570141	0.478159	0.62882	PF3D7_1305900	193	T	___2	IS(1)IT(1)PPRDNGMEWPDDLDLR	4	QDENNIISKMRKISITPPRDNGMEWPDDLDL	PF13_0031
PF3D7_0601900		conserved Plasmodium protein, unknown function	Yes	0.36183	0.246	0.27605	0.27535	0.07423	0.16484	-0.132469	1.42892	1.79075	1.24187	1.48787	1.29271	1.56876	1.46199	1.73734	1.38354	1.45777	1.46145	1.62629	0.565599	0.43313	PF3D7_0601900	117	S	___2	SHS(0.005)S(0.067)S(0.918)S(0.01)SVYASANAEN	5	KTSSSSRQAARSHSSSSSVYASANAEN____	2270.t00296;MAL6P1.22;PFF0090w
PF3D7_0818200	14-3-3I	14-3-3 protein	No	0.36181	0.10994	0.1065	0.29505	0.18153	0.14113	-0.0358	6.15971	6.52152	6.50205	6.61199	6.41598	6.52248	6.28849	6.58354	6.23042	6.41195	6.14192	6.28305	6.33723	6.30143	PF3D7_0818200	252	T	___1	DNLTLWTSDLQGDQT(1)EEK	15	RDNLTLWTSDLQGDQTEEKSKDEGLE_____	MAL8P1.69
PF3D7_1136600		conserved Plasmodium protein, unknown function	No	0.36157	0.24081	-0.15604	0.06211	-0.25857	-0.20758	0.09298	-2.42276	-2.06119	-2.70435	-2.46354	-2.17169	-2.32773	-2.28716	-2.22505	-2.52704	-2.78561	-2.09434	-2.30192	-2.36842	-2.27544	PF3D7_1136600	1156	S	___2	KDVEDVFS(0.854)DLDIES(0.339)S(0.319)NNS(0.308)T(0.18)NQLDNK	8	NNNISKGKKDVEDVFSDLDIESSNNSTNQLD	PF11_0378
PF3D7_1127800		conserved Plasmodium protein, unknown function	No	0.360836	0.278078	0.28084	0.466765	0.181139	0.206309	0.349911	0.524275	0.885111	0.191671	0.469749	0.32571	0.60655	0.171535	0.6383	0.35417	0.535309	0.283901	0.49021	0.06674	0.416651	PF3D7_1127800	122	S	___1	NEDEKS(1)IIQDGK	6	NKNEYNNLSKNEDEKSIIQDGKCDISNSSYD	PF11_0289
PF3D7_0918900	gammaGCS	gamma-glutamylcysteine synthetase	No	0.36047	0.11602	0.08362	0.21287	0.21396	0.10079	0.07762	1.51056	1.87103	1.21943	1.33545	1.39699	1.48061	1.36391	1.57678	1.2762	1.49016	1.27406	1.37485	1.32232	1.39994	PF3D7_0918900	243	S	___1	STNFVNS(0.978)DT(0.022)VFAK	7	VSYEMDENKSTNFVNSDTVFAKNDEEGEVEE	PFI0925w
PF3D7_1107800	ApiAP2	AP2 domain transcription factor, putative	No	0.360365	0.285129	0.0949898	0.221587	0.0794678	0.20912	0.034481	-0.235645	0.12472	-0.29487	-0.00974083	-0.175539	-0.0805492	-0.264336	-0.0427494	-0.00997925	0.0694885	-0.0552788	0.153841	-0.09589	-0.061409	PF3D7_1107800	1039	S	___1	LECS(0.016)S(0.797)AS(0.187)DINK	5	DAKNYYDNKLKLECSSASDINKFLQDYKLND	PF11_0091
PF3D7_0206300	AROM	pentafunctional AROM polypeptide, putative, pseudogene	No	0.36009	0.22143	0.25459	0.4108	0.24965	0.24413	0.2325	4.10877	4.46886	3.93776	4.15919	4.07312	4.32771	4.05249	4.46329	4.00743	4.25708	3.99438	4.23851	4.0259	4.2584	PF3D7_0206300	1953	T	___1	GST(1)PDEK	3	NLLHCTKKKRPQRGSTPDEKYKGGEIKGNDI	PF02_0059;PF02_0060;PF3D7_0206400;PFB0279w;PFB0280w
PF3D7_0318100	STOML	stomatin-like protein	No	0.360006	0.25391	0.256241	0.160915	0.0297795	0.0958693	0.390022	-0.336885	0.0231209	-0.31163	-0.0577202	-0.193279	0.0629616	-0.0841541	0.0767612	-0.0629292	-0.0331497	-0.124079	-0.0282097	-0.350351	0.0396709	PF3D7_0318100	266	S	___1	S(1)ILIAEGQSFAIK	1	ERESEINIAIGKKRKSILIAEGQSFAIKAKA	MAL3P6.19;PFC0800w
PF3D7_0401800	PfD80	Plasmodium exported protein (PHISTb), unknown function	Yes	0.359966	0.154678	-0.21834	0.404437	0.208429	0.526371	0.04924	-0.256435	0.103531	-0.858629	-0.703951	-0.164089	-0.382429	-0.777615	-0.373178	-0.637609	-0.42918	-1.40654	-0.880169	-0.93458	-0.88534	PF3D7_0401800	81	T	___2	S(0.008)PS(0.003)T(0.016)AS(0.923)T(0.049)S(0.012)T(0.824)S(0.166)LR	9	LASTTKRSPSTASTSTSLRSASTASTASTLR	MAL4P1.16;PFD0080c
PF3D7_1353200	MAHRP2	membrane associated histidine-rich protein	Yes	0.35946	0.2588	-0.03444	0.28542	-0.08099	0.27828	-0.264679	1.00761	1.36707	1.32804	1.58684	1.15201	1.11757	1.65186	1.93728	1.39488	1.31389	1.34499	1.62327	-0.871481	-1.13616	PF3D7_1353200	125	S	___1	EQS(0.001)KS(0.873)T(0.098)S(0.026)DS(0.001)STSTQQTL	5	VNEEHKAEASKEQSKSTSDSSTSTQQTL___	PF13_0276
PF3D7_0500800	MESA	mature parasite-infected erythrocyte surface antigen	Yes	0.359135	0.789999	0.739279	0.688791	0.3061	0.566279	0.35377	-0.645935	-0.2868	-1.33079	-0.540791	-0.917139	-0.17786	-1.03853	-0.349739	-1.31698	-1.01088	-0.798239	-0.23196	-1.14808	-0.79431	PF3D7_0500800	393	T	___1	LT(1)EQEENGTK	2	VNDGASENSEDPKKLTEQEENGTKESSEETK	MAL5P1.9;PFE0040c
PF3D7_1231100	RAB2	ras-related protein Rab-2	No	0.35901	0.72544	0.1812	-0.34572	0.45892	0.29543	0.02379	-4.15322	-3.79421	-5.04911	-4.32367	-4.63363	-4.45243	-3.77355	-4.11927	-4.11337	-3.65445	-4.22403	-3.9286	-4.10528	-4.08149	PF3D7_1231100	2	S	___1	MS(0.543)PY(0.452)EY(0.005)LFK	2	______________MSPYEYLFKYIIIGDTG	2277.t00300;MAL12P1.300;PFL1500w
PF3D7_1126800	SR-MG	RNA-binding protein, putative	No	0.35898	0.35507	0.57902	0.4122	0.35358	0.53151	0.08414	-1.6104	-1.25142	-1.78628	-1.43121	-1.95179	-1.37277	-1.70024	-1.28804	-1.8036	-1.45002	-1.82353	-1.29202	-1.55972	-1.47558	PF3D7_1126800	425	T	___1	DIY(0.012)KDEENT(0.812)DEGHINS(0.078)NMY(0.083)T(0.014)NLNK	9	EVEKKCRDIYKDEENTDEGHINSNMYTNLNK	PF11_0279
PF3D7_1149000	Pf332	antigen 332, DBL-like protein	Yes	0.35891	0.56987	0.470089	0.355156	0.523338	0.415071	0.516552	1.10342	1.46233	0.38139	0.95126	0.663881	1.13397	0.644686	0.999842	0.00369072	0.527029	0.27718	0.692251	0.431309	0.947861	PF3D7_1149000	1449	S	___1	VEVAS(0.997)IT(0.003)EEVEEEEK	5	VAQRASVNDEKVEVASITEEVEEEEKSVSEE	PF11_0506;PF11_0507
PF3D7_0702500		Plasmodium exported protein, unknown function	Yes	0.35889	0.07114	0.29055	0.2545	0.29689	0.14138	0.26142	3.56505	3.92394	3.78144	3.85258	3.14807	3.43862	3.54989	3.80439	3.45766	3.75455	3.3922	3.53358	4.025	4.28642	PF3D7_0702500	211	S	___1	HYS(1)LGGQPSSSGR	3	STGTTSQGSTSSRHYSLGGQPSSSGRSFSGS	PF07_0008
[truncated: 16,052 more rows]

## Sheet: 2_16PLEX_Phospho_Human
Leading Protein ID	Gene Name	Product Description	Log2FC NF54 WT Heat Stress / NF54 WT Control	Log2FC FIKK1 KO Heat Stress / FIKK1 KO Control	Log2FC FIKK4.1 KO Heat Stress / FIKK4.1 KO Control	Log2FC FIKK4.2 KO Heat Stress / FIKK4.2 KO Control	Log2FC FIKK9's KO Heat Stress / FIKK9's KO Control	Log2FC FIKK10.1 KO Heat Stress / FIKK10.1 KO Control	Log2FC FIKK10.2 KO Heat Stress / FIKK10.2 KO Control	Log2FC uRBC Heat Stress / uRBC Control	Log2 NF54	Log2 NF54 Heat Stressed	Log2 KO FIKK1	Log2 KO FIKK1 Heat Stressed	Log2 KO FIKK4.1	Log2 KO FIKK4.1 Heat Stressed	Log2 KO FIKK4.2	Log2 KO FIKK4.2 Heat Stressed	Log2 KO FIKK9s	Log2 KO FIKK9s Heat Stressed	Log2 KO FIKK10.1	Log2 KO FIKK10.1 Heat Stressed	Log2 KO FIKK10.2	Log2 KO FIKK10.2 Heat Stressed	Log2 uRBC	Log2 uRBC Heat Stressed	Possible Protein ID Matches	Positions within proteins	Amino acid	Phosphosite Multiplicity	Phospho (STY) Probabilities	Position in peptide	Sequence window
[truncated: 1,395 more rows]

[truncated: 2 more sheets: 3_16PLEX_Proteome_Pf, 4_16PLEX_Proteome_Human]
